# Supplementary material for: Genetically incorporated crosslinkers reveal NleE attenuates host autophagy dependent on PSMD10
Source: eLife. 2021 Jul 13;10:e69047. doi: 10.7554/eLife.69047 (PMC8324295; doi:10.7554/eLife.69047)
Supplement: Figure 1—figure supplement 1—source data 1. [file elife-69047-fig1-figsupp1-data1.sourcedata.xls]

## Sheet: Sheet1
Sample	IL-6 rep1	IL-6 rep2	IL-6 rep3	Mean	Standard deviation
Ctrl	2.8508	2.30375	0.115524	1.75669	1.44737
EPEC WT	56.9182	35.583	41.6918	44.731	10.9875
EPEC NleE KO	84.5141	72.5093	63.0574	73.3602	10.7537
