# Supplementary material for: Genetically incorporated crosslinkers reveal NleE attenuates host autophagy dependent on PSMD10
Source: eLife. 2021 Jul 13;10:e69047. doi: 10.7554/eLife.69047 (PMC8324295; doi:10.7554/eLife.69047)
Supplement: Figure 1—figure supplement 1—source data 2. [file elife-69047-fig1-figsupp1-data2.sourcedata.xls]

## Sheet: Sheet1
Sample	IL-6 rep1	IL-6 rep2	IL-6 rep3	IL-6 rep4	Mean	Standard deviation
EPEC WT	73.6034	69.622	71.871	73.573	72.1674	1.88012
EPEC NleE KO	97.5219	92.9935	89.7111	92.1425	93.0922	3.26422
