# Supplementary material for: Genetically incorporated crosslinkers reveal NleE attenuates host autophagy dependent on PSMD10
Source: eLife. 2021 Jul 13;10:e69047. doi: 10.7554/eLife.69047 (PMC8324295; doi:10.7554/eLife.69047)
Supplement: Figure 1—figure supplement 1—source data 3. [file elife-69047-fig1-figsupp1-data3.xls]

## Sheet: Sheet1
Sample	IL-6 rep1	IL-6 rep2	IL-6 rep3	Mean	Standard deviation
EPEC WT	53.0888	48.3172	54.5476	51.9845	3.25866
EPEC WT+Wortmannin	37.0722	37.2849	45.7947	40.0506	4.97566
