# Supplementary material for: Genetically incorporated crosslinkers reveal NleE attenuates host autophagy dependent on PSMD10
Source: eLife. 2021 Jul 13;10:e69047. doi: 10.7554/eLife.69047 (PMC8324295; doi:10.7554/eLife.69047)
Supplement: Figure 1—source data 1. [file elife-69047-fig1-data1.xls]

## Sheet: Sheet1
Sample	Ctrl	NleE
	232	201
	252	178
	224	184
	206	121
	232	122
	192	98
	202	95
	219	88
	181	91
	194	86
	165	75
	155	77
	153	72
	128	62
	133	63
	122	60
	93	53
	91	63
	78	57
	72	51
	56	55
	63	48
	53	49
	48	43
	52	44
Mean	143.84	85.44
Standard deviation	67.4776	44.3988
