# Supplementary material for: Genetically incorporated crosslinkers reveal NleE attenuates host autophagy dependent on PSMD10
Source: eLife. 2021 Jul 13;10:e69047. doi: 10.7554/eLife.69047 (PMC8324295; doi:10.7554/eLife.69047)
Supplement: Figure 1—source data 2. [file elife-69047-fig1-data2.xls]

## Sheet: Sheet1
Sample	LC3-II/LC3-1 rep1	LC3-II/LC3-1 rep2	LC3-II/LC3-1 rep3	LC3-II/LC3-1 rep4	Mean	Standard deviation
Ctrl	1.3908	1.81011	1.82557	1.40694	1.60836	0.242062
NleE	0.901114	1.20806	1.07655	0.814828	1.00014	0.176272
