# Supplementary material for: Genetically incorporated crosslinkers reveal NleE attenuates host autophagy dependent on PSMD10
Source: eLife. 2021 Jul 13;10:e69047. doi: 10.7554/eLife.69047 (PMC8324295; doi:10.7554/eLife.69047)
Supplement: Figure 1—source data 3. [file elife-69047-fig1-data3.xls]

## Sheet: Sheet1
Sample	Ctrl	NleE
	97	50
	96	44
	96	62
	95	43
	95	45
	95	50
	94	42
	94	57
	93	23
	85	67
	81	49
	80	32
	79	62
	75	53
	74	84
	73	95
	71	40
	66	26
	54	41
	48	41
	48	41
	45	66
	43	44
	41	35
Mean	75.75	49.6667
Standard deviation	19.6231	16.7816
