# Supplementary material for: Genetically incorporated crosslinkers reveal NleE attenuates host autophagy dependent on PSMD10
Source: eLife. 2021 Jul 13;10:e69047. doi: 10.7554/eLife.69047 (PMC8324295; doi:10.7554/eLife.69047)
Supplement: Figure 1—source data 4. [file elife-69047-fig1-data4.sourcedata.xls]

## Sheet: Sheet1
Sample	Ctrl	OE NleE
	40	37
	58	12
	24	20
	25	18
	40	21
	37	43
	32	26
	40	44
	70	29
	25	14
	28	41
	31	11
	48	19
	43	21
	34	36
	33	14
	40	35
	51	42
	41	24
	34	15
	25	12
	38	26
	72	50
	76	9
	80	53
	28	48
	28	32
	37	29
	44	16
	29	14
	40	55
Mean	41	27.9355
Standard deviation	15.3796	13.8153
