# Supplementary material for: Genetically incorporated crosslinkers reveal NleE attenuates host autophagy dependent on PSMD10
Source: eLife. 2021 Jul 13;10:e69047. doi: 10.7554/eLife.69047 (PMC8324295; doi:10.7554/eLife.69047)
Supplement: Figure 1—source data 5. [file elife-69047-fig1-data5.xls]

## Sheet: Sheet1
Sample	Ctrl	NleE
	0.111111	0.25
	0.230769	0.257143
	0.31579	0.166667
	0.2	0.128205
	0.12766	0.0816327
	0.444444	0.0625
	0.6	0.115385
	0.6	0.25
	0.3125	0.294118
	0.555556	0.214286
	0.238095	0.181818
	0.222222	0.3
	0.583333	0.416667
	0.454545	0.190476
	0.1875	0.275862
	0.318182	0.111111
	0.294118	0.214286
	0.421053	0.2
	0.375	0.235294
	0.444444	0.25
	0.157895	0.4
Mean	0.342582	0.218831
Standard deviation	0.157651	0.0925189
