# Supplementary material for: Genetically incorporated crosslinkers reveal NleE attenuates host autophagy dependent on PSMD10
Source: eLife. 2021 Jul 13;10:e69047. doi: 10.7554/eLife.69047 (PMC8324295; doi:10.7554/eLife.69047)
Supplement: Figure 1—source data 6. [file elife-69047-fig1-data6.xls]

## Sheet: Sheet1
Sample	EPEC WT	EPEC NleE KO
	6	29
	14	19
	8	33
	16	11
	10	10
	13	34
	14	14
	8	10
	6	18
	21	15
	6	7
	13	20
	17	11
	20	14
	9	15
	8	36
	12	12
	11	16
	11	8
	17	22
	16	16
	14	15
	10	12
	10	21
	6	18
	17	22
	7	12
	15	18
Mean	11.9643	17.4286
Standard deviation	4.36724	7.66149
