# Supplementary material for: Genetically incorporated crosslinkers reveal NleE attenuates host autophagy dependent on PSMD10
Source: eLife. 2021 Jul 13;10:e69047. doi: 10.7554/eLife.69047 (PMC8324295; doi:10.7554/eLife.69047)
Supplement: Figure 1—source data 8. [file elife-69047-fig1-data8.xls]

## Sheet: Sheet1
Sample	Ctrl	NleE
	77	39
	63	98
	116	71
	82	152
	53	140
	126	74
	110	65
	123	114
	80	68
	113	99
	99	52
	136	69
	73	89
	112	90
	98	102
	164	67
	89	123
	174	65
	138	58
	90	92
	144	91
	64	67
	135	118
	97	67
	112	150
	152	118
Mean	108.462	89.9231
Standard deviation	31.8901	30.2786
