# Supplementary material for: Genetically incorporated crosslinkers reveal NleE attenuates host autophagy dependent on PSMD10
Source: eLife. 2021 Jul 13;10:e69047. doi: 10.7554/eLife.69047 (PMC8324295; doi:10.7554/eLife.69047)
Supplement: Figure 2—figure supplement 1—source data 1. [file elife-69047-fig2-figsupp1-data1.xls]

## Sheet: Sheet1
Sample	NleE level	actin level	NleE/actin	normalized
NleE-Y212Azi	42641	52612	0.81048	0.747002
NleE-M213Azi	62140	55169	1.12636	1.03814
NleE-K214Azi	32053	53715	0.596723	0.549987
NleE-Y215Azi	38273	56716	0.674818	0.621965
NleE-I216Azi	65291	55655	1.17314	1.08126
NleE-N217Azi	46510	49925	0.931597	0.858632
NleE-WT	61566	56744	1.08498	1
