# Supplementary material for: Genetically incorporated crosslinkers reveal NleE attenuates host autophagy dependent on PSMD10
Source: eLife. 2021 Jul 13;10:e69047. doi: 10.7554/eLife.69047 (PMC8324295; doi:10.7554/eLife.69047)
Supplement: Figure 2—figure supplement 2—source data 1. [file elife-69047-fig2-figsupp2-data1.xls]

## Sheet: NleE WT(1)
Accession	Description	Coverage	# Peptides	# PSMs	# Unique Peptides	# Protein Groups	# AAs	MW [kDa]	calc. pI	Score Mascot	# Peptides Mascot
Q9HCN8	Stromal cell-derived factor 2-like protein 1 OS=Homo sapiens GN=SDF2L1 PE=1 SV=2	59.7285	6	10	6	1	221	23.584	7.03	614.006	6
P35908	Keratin, type II cytoskeletal 2 epidermal OS=Homo sapiens GN=KRT2 PE=1 SV=2	58.529	28	33	22	1	639	65.393	8	1619.78	28
Q4VCS5	Angiomotin OS=Homo sapiens GN=AMOT PE=1 SV=1	56.7343	39	85	39	1	1084	118.013	7.64	2894.78	39
Q15233	Non-POU domain-containing octamer-binding protein OS=Homo sapiens GN=NONO PE=1 SV=4	53.9278	21	59	20	1	471	54.197	8.95	1901.69	21
Q7L2J0	7SK snRNA methylphosphate capping enzyme OS=Homo sapiens GN=MEPCE PE=1 SV=1	52.3948	22	35	22	1	689	74.31	9.57	1041.68	22
Q8IWS0	PHD finger protein 6 OS=Homo sapiens GN=PHF6 PE=1 SV=1	50.9589	13	22	13	1	365	41.264	8.68	878.776	13
Q9UG63	ATP-binding cassette sub-family F member 2 OS=Homo sapiens GN=ABCF2 PE=1 SV=2	50.5618	25	41	25	1	623	71.245	7.37	1310.84	25
P0CG48	Polyubiquitin-C OS=Homo sapiens GN=UBC PE=1 SV=3	49.927	3	6	3	1	685	76.992	7.66	246.88	3
P0CG47	Polyubiquitin-B OS=Homo sapiens GN=UBB PE=1 SV=1	49.7817	3	6	3	1	229	25.746	7.43	246.88	3
Q7Z417	Nuclear fragile X mental retardation-interacting protein 2 OS=Homo sapiens GN=NUFIP2 PE=1 SV=1	49.4964	24	42	24	1	695	76.075	8.7	1543.28	24
P14866	Heterogeneous nuclear ribonucleoprotein L OS=Homo sapiens GN=HNRNPL PE=1 SV=2	48.8964	22	39	22	1	589	64.092	8.22	1242.26	22
P35527	Keratin, type I cytoskeletal 9 OS=Homo sapiens GN=KRT9 PE=1 SV=3	48.3146	25	40	25	1	623	62.027	5.24	2096.4	25
P11387	DNA topoisomerase 1 OS=Homo sapiens GN=TOP1 PE=1 SV=2	45.6209	34	49	34	1	765	90.669	9.31	1616.39	34
Q7Z2T5	TRMT1-like protein OS=Homo sapiens GN=TRMT1L PE=1 SV=2	43.6562	23	27	23	1	733	81.695	7.88	962.452	23
P46776	60S ribosomal protein L27a OS=Homo sapiens GN=RPL27A PE=1 SV=2	40.5405	9	39	9	1	148	16.551	11	1184.09	9
P62917	60S ribosomal protein L8 OS=Homo sapiens GN=RPL8 PE=1 SV=2	40.0778	8	20	8	1	257	28.007	11.03	631.721	8
P04264	Keratin, type II cytoskeletal 1 OS=Homo sapiens GN=KRT1 PE=1 SV=6	40.0621	22	36	18	1	644	65.999	8.12	1753.37	22
Q7L3S4	Zinc finger protein 771 OS=Homo sapiens GN=ZNF771 PE=1 SV=1	39.1167	9	15	9	1	317	35.679	8.79	237.062	9
Q8WWM7	Ataxin-2-like protein OS=Homo sapiens GN=ATXN2L PE=1 SV=2	39.0698	30	52	30	1	1075	113.304	8.59	1589.49	30
Q9BZE4	Nucleolar GTP-binding protein 1 OS=Homo sapiens GN=GTPBP4 PE=1 SV=3	35.489	18	24	18	1	634	73.918	9.5	596.532	18
P13645	Keratin, type I cytoskeletal 10 OS=Homo sapiens GN=KRT10 PE=1 SV=6	35.4452	21	35	20	1	584	58.792	5.21	1525.77	21
Q9BU76	Multiple myeloma tumor-associated protein 2 OS=Homo sapiens GN=MMTAG2 PE=1 SV=1	35.3612	11	16	11	1	263	29.394	10.02	487.302	11
P61313	60S ribosomal protein L15 OS=Homo sapiens GN=RPL15 PE=1 SV=2	34.3137	7	13	7	1	204	24.131	11.62	413.866	7
O60563	Cyclin-T1 OS=Homo sapiens GN=CCNT1 PE=1 SV=1	34.022	16	22	14	1	726	80.634	8.78	850.978	16
Q9UEG4	Zinc finger protein 629 OS=Homo sapiens GN=ZNF629 PE=1 SV=2	32.5662	20	22	20	1	869	96.559	7.93	687.6	20
P15622	Zinc finger protein 250 OS=Homo sapiens GN=ZNF250 PE=1 SV=3	32.1429	11	15	10	1	560	63.427	8.28	321.605	11
Q99700	Ataxin-2 OS=Homo sapiens GN=ATXN2 PE=1 SV=2	31.9117	29	43	29	1	1313	140.196	9.57	1653.47	29
P02533	Keratin, type I cytoskeletal 14 OS=Homo sapiens GN=KRT14 PE=1 SV=4	30.5085	10	13	7	1	472	51.529	5.16	651.43	10
P58317	Zinc finger protein 121 OS=Homo sapiens GN=ZNF121 PE=3 SV=2	30	9	14	8	1	390	44.665	8.05	403.122	9
P62987	Ubiquitin-60S ribosomal protein L40 OS=Homo sapiens GN=UBA52 PE=1 SV=2	29.6875	3	6	3	1	128	14.719	9.83	246.88	3
Q9Y6Q3	Zinc finger protein 37 homolog OS=Homo sapiens GN=ZFP37 PE=2 SV=3	29.6825	13	18	13	1	630	71.164	9.09	490.627	13
Q99470	Stromal cell-derived factor 2 OS=Homo sapiens GN=SDF2 PE=1 SV=2	28.91	3	5	3	1	211	23.011	7.33	262.03	3
Q5VV52	Zinc finger protein 691 OS=Homo sapiens GN=ZNF691 PE=1 SV=1	27.5641	7	9	7	1	312	35.658	7.9	358.748	7
Q96EV2	RNA-binding protein 33 OS=Homo sapiens GN=RBM33 PE=1 SV=3	26.2393	17	20	17	1	1170	129.906	6.93	736.597	17
Q9H5H4	Zinc finger protein 768 OS=Homo sapiens GN=ZNF768 PE=1 SV=2	26.1111	11	14	11	1	540	60.191	7.97	505.207	11
Q15072	Zinc finger protein OZF OS=Homo sapiens GN=ZNF146 PE=1 SV=2	26.0274	6	9	6	1	292	33.286	8.88	283.156	6
Q9Y580	RNA-binding protein 7 OS=Homo sapiens GN=RBM7 PE=1 SV=1	25.9398	4	5	4	1	266	30.485	9.57	220.23	4
O94842	TOX high mobility group box family member 4 OS=Homo sapiens GN=TOX4 PE=1 SV=1	25.6039	11	13	11	1	621	66.153	5.06	662.413	11
P13647	Keratin, type II cytoskeletal 5 OS=Homo sapiens GN=KRT5 PE=1 SV=3	25.5932	15	16	8	1	590	62.34	7.74	511.28	15
Q9NWT1	p21-activated protein kinase-interacting protein 1 OS=Homo sapiens GN=PAK1IP1 PE=1 SV=2	25.2551	7	7	7	1	392	43.936	8.91	236.619	7
P02538	Keratin, type II cytoskeletal 6A OS=Homo sapiens GN=KRT6A PE=1 SV=3	25.1773	14	14	6	1	564	60.008	8	399.156	14
Q7Z2E3	Aprataxin OS=Homo sapiens GN=APTX PE=1 SV=2	25	6	7	6	1	356	40.714	9.17	206.489	6
P22087	rRNA 2'-O-methyltransferase fibrillarin OS=Homo sapiens GN=FBL PE=1 SV=2	24.6106	6	6	6	1	321	33.763	10.18	152.313	6
P39023	60S ribosomal protein L3 OS=Homo sapiens GN=RPL3 PE=1 SV=2	24.5658	6	9	6	1	403	46.08	10.18	342.892	6
P62979	Ubiquitin-40S ribosomal protein S27a OS=Homo sapiens GN=RPS27A PE=1 SV=2	24.359	3	6	3	1	156	17.953	9.64	246.88	3
Q96K58	Zinc finger protein 668 OS=Homo sapiens GN=ZNF668 PE=1 SV=3	24.0711	11	13	11	1	619	67.846	8.9	302.23	11
P48668	Keratin, type II cytoskeletal 6C OS=Homo sapiens GN=KRT6C PE=1 SV=3	23.4043	13	13	5	1	564	59.988	8	367.584	13
Q13595	Transformer-2 protein homolog alpha OS=Homo sapiens GN=TRA2A PE=1 SV=1	23.0496	5	6	5	1	282	32.669	11.27	241.79	5
P17020	Zinc finger protein 16 OS=Homo sapiens GN=ZNF16 PE=1 SV=3	23.0205	10	11	10	1	682	76.422	7.97	284.124	10
P46778	60S ribosomal protein L21 OS=Homo sapiens GN=RPL21 PE=1 SV=2	22.5	3	3	3	1	160	18.553	10.49	61.7333	3
Q8TF47	Zinc finger protein 90 homolog OS=Homo sapiens GN=ZFP90 PE=1 SV=2	22.4843	7	9	7	1	636	72.985	8.06	357.232	7
Q9NW07	Zinc finger protein 358 OS=Homo sapiens GN=ZNF358 PE=1 SV=2	21.831	8	10	8	1	568	59.25	6.6	314.448	8
Q02543	60S ribosomal protein L18a OS=Homo sapiens GN=RPL18A PE=1 SV=2	21.0227	3	3	3	1	176	20.749	10.71	121.373	3
Q15428	Splicing factor 3A subunit 2 OS=Homo sapiens GN=SF3A2 PE=1 SV=2	20.6897	7	11	7	1	464	49.224	9.64	435.59	7
P04259	Keratin, type II cytoskeletal 6B OS=Homo sapiens GN=KRT6B PE=1 SV=5	20.5674	12	12	5	0	564	60.03	8	333.266	12
Q8NAV1	Pre-mRNA-splicing factor 38A OS=Homo sapiens GN=PRPF38A PE=1 SV=1	20.5128	5	7	5	1	312	37.453	9.96	236.283	5
Q13523	Serine/threonine-protein kinase PRP4 homolog OS=Homo sapiens GN=PRPF4B PE=1 SV=3	20.3575	19	21	19	1	1007	116.916	10.26	901.936	19
Q99676	Zinc finger protein 184 OS=Homo sapiens GN=ZNF184 PE=1 SV=4	20.2397	11	15	11	1	751	86.119	8.07	322.239	11
Q96QC0	Serine/threonine-protein phosphatase 1 regulatory subunit 10 OS=Homo sapiens GN=PPP1R10 PE=1 SV=1	20.2128	13	15	13	1	940	98.996	9.17	538.45	13
Q15427	Splicing factor 3B subunit 4 OS=Homo sapiens GN=SF3B4 PE=1 SV=1	20.0472	5	11	5	1	424	44.357	8.56	500.522	5
Q9UC06	Zinc finger protein 70 OS=Homo sapiens GN=ZNF70 PE=2 SV=2	19.0583	6	7	6	1	446	50.769	8.31	194.83	6
Q75N03	E3 ubiquitin-protein ligase Hakai OS=Homo sapiens GN=CBLL1 PE=1 SV=1	18.9409	5	6	5	1	491	54.484	8.29	135.649	5
Q9H116	GDNF-inducible zinc finger protein 1 OS=Homo sapiens GN=GZF1 PE=1 SV=1	18.706	10	10	10	1	711	80.441	7.87	338.58	10
Q12986	Transcriptional repressor NF-X1 OS=Homo sapiens GN=NFX1 PE=1 SV=2	18.3929	14	16	14	1	1120	124.312	8.24	578.336	14
Q8NB50	Zinc finger protein 62 homolog OS=Homo sapiens GN=ZFP62 PE=1 SV=3	18.3333	11	12	11	1	900	102.445	9.04	326.412	11
P49711	Transcriptional repressor CTCF OS=Homo sapiens GN=CTCF PE=1 SV=1	18.2944	9	14	9	1	727	82.732	6.96	559.111	9
Q14151	Scaffold attachment factor B2 OS=Homo sapiens GN=SAFB2 PE=1 SV=1	17.3137	12	18	12	1	953	107.408	6.16	698.584	12
O43143	Pre-mRNA-splicing factor ATP-dependent RNA helicase DHX15 OS=Homo sapiens GN=DHX15 PE=1 SV=2	17.1069	10	10	10	1	795	90.875	7.46	327.45	10
P08779	Keratin, type I cytoskeletal 16 OS=Homo sapiens GN=KRT16 PE=1 SV=4	16.9133	6	8	3	1	473	51.236	5.05	308.677	6
Q8NDT2	Putative RNA-binding protein 15B OS=Homo sapiens GN=RBM15B PE=1 SV=3	16.4045	12	14	12	1	890	97.147	9.85	392.821	12
Q5HYJ3	Protein FAM76B OS=Homo sapiens GN=FAM76B PE=1 SV=3	16.2242	4	4	4	1	339	38.683	9.25	161.47	4
Q8IWX8	Calcium homeostasis endoplasmic reticulum protein OS=Homo sapiens GN=CHERP PE=1 SV=3	16.1572	12	15	12	1	916	103.637	9.04	462.13	12
A8MTY0	Zinc finger protein 724 OS=Homo sapiens GN=ZNF724 PE=2 SV=3	16.1551	6	7	4	1	619	71.126	9.11	158.214	6
P17098	Zinc finger protein 8 OS=Homo sapiens GN=ZNF8 PE=1 SV=2	15.6522	6	7	6	1	575	64.93	7.39	170.39	6
O00257	E3 SUMO-protein ligase CBX4 OS=Homo sapiens GN=CBX4 PE=1 SV=3	15.5357	7	9	7	1	560	61.329	9.36	414.381	7
Q71UM5	40S ribosomal protein S27-like OS=Homo sapiens GN=RPS27L PE=1 SV=3	15.4762	1	1	1	1	84	9.471	9.45	88.38	1
P42677	40S ribosomal protein S27 OS=Homo sapiens GN=RPS27 PE=1 SV=3	15.4762	1	1	1	1	84	9.455	9.45	88.38	1
Q12788	Transducin beta-like protein 3 OS=Homo sapiens GN=TBL3 PE=1 SV=2	14.604	9	9	9	1	808	88.978	6.9	304.437	9
P46783	40S ribosomal protein S10 OS=Homo sapiens GN=RPS10 PE=1 SV=1	14.5455	2	2	2	1	165	18.886	10.15	88.3651	2
P23246	Splicing factor, proline- and glutamine-rich OS=Homo sapiens GN=SFPQ PE=1 SV=2	14.4272	7	9	6	1	707	76.102	9.44	249.759	7
O75400	Pre-mRNA-processing factor 40 homolog A OS=Homo sapiens GN=PRPF40A PE=1 SV=2	14.3156	14	15	14	1	957	108.737	7.56	592.421	14
P05386	60S acidic ribosomal protein P1 OS=Homo sapiens GN=RPLP1 PE=1 SV=1	14.0351	1	1	1	1	114	11.507	4.32	42.41	1
P17019	Zinc finger protein 708 OS=Homo sapiens GN=ZNF708 PE=1 SV=5	14.0281	4	4	2	1	499	57.32	9.39	89.286	4
O60583	Cyclin-T2 OS=Homo sapiens GN=CCNT2 PE=1 SV=2	13.6986	6	6	4	1	730	80.979	8.92	259.37	6
Q8TF39	Zinc finger protein 483 OS=Homo sapiens GN=ZNF483 PE=1 SV=3	13.5753	8	8	8	1	744	85.044	8.57	189.324	8
P62750	60S ribosomal protein L23a OS=Homo sapiens GN=RPL23A PE=1 SV=1	13.4615	2	2	2	1	156	17.684	10.45	47.89	2
P17036	Zinc finger protein 3 OS=Homo sapiens GN=ZNF3 PE=1 SV=3	13.4529	2	4	0	0	446	50.884	7.52	144.226	2
Q03936	Zinc finger protein 92 OS=Homo sapiens GN=ZNF92 PE=2 SV=2	13.3106	4	4	2	0	586	68.442	9.28	58.156	4
Q96MX3	Zinc finger protein 48 OS=Homo sapiens GN=ZNF48 PE=1 SV=2	13.2686	5	6	5	1	618	67.777	9.36	171.85	5
P84098	60S ribosomal protein L19 OS=Homo sapiens GN=RPL19 PE=1 SV=1	13.2653	2	2	2	1	196	23.451	11.47	95.34	2
Q5VWQ0	Round spermatid basic protein 1 OS=Homo sapiens GN=RSBN1 PE=1 SV=2	12.9676	7	9	7	1	802	90.015	8.6	310.134	7
P26373	60S ribosomal protein L13 OS=Homo sapiens GN=RPL13 PE=1 SV=4	12.7962	3	3	3	1	211	24.247	11.65	100.117	3
Q9H9J4	Ubiquitin carboxyl-terminal hydrolase 42 OS=Homo sapiens GN=USP42 PE=1 SV=3	12.4622	7	14	7	1	1324	145.302	8.63	262.93	7
O43309	Zinc finger and SCAN domain-containing protein 12 OS=Homo sapiens GN=ZSCAN12 PE=1 SV=1	12.4172	5	5	4	1	604	70.178	6.74	152.103	5
P56270	Myc-associated zinc finger protein OS=Homo sapiens GN=MAZ PE=1 SV=1	12.369	5	8	5	1	477	48.576	8.95	205.603	5
P10075	Zinc finger protein GLI4 OS=Homo sapiens GN=GLI4 PE=1 SV=2	12.234	3	4	2	1	376	41.119	8.81	129.35	3
Q8NCA5	Protein FAM98A OS=Homo sapiens GN=FAM98A PE=1 SV=1	11.9461	2	2	2	1	519	55.366	9.03	145.208	2
P05109	Protein S100-A8 OS=Homo sapiens GN=S100A8 PE=1 SV=1	11.828	1	1	1	1	93	10.828	7.03	0	1
Q9P2N5	RNA-binding protein 27 OS=Homo sapiens GN=RBM27 PE=1 SV=2	11.7925	8	8	8	1	1060	118.645	9.19	215.265	8
O95625	Zinc finger and BTB domain-containing protein 11 OS=Homo sapiens GN=ZBTB11 PE=1 SV=2	11.301	10	10	10	1	1053	119.308	8.66	405.551	10
Q9H7X3	Zinc finger protein 696 OS=Homo sapiens GN=ZNF696 PE=2 SV=2	11.2299	2	2	2	1	374	40.549	8.92	163.176	2
Q9ULD5	Zinc finger protein 777 OS=Homo sapiens GN=ZNF777 PE=1 SV=2	11.1842	6	7	6	1	760	85.123	5.92	87.37	6
Q9GZN8	UPF0687 protein C20orf27 OS=Homo sapiens GN=C20orf27 PE=1 SV=3	10.9195	1	1	1	1	174	19.279	6.84	55.41	1
Q14241	Transcription elongation factor B polypeptide 3 OS=Homo sapiens GN=TCEB3 PE=1 SV=2	10.9023	6	9	6	1	798	89.853	9.57	301.556	6
A0A075B6S6	Immunoglobulin kappa variable 2D-30 OS=Homo sapiens GN=IGKV2D-30 PE=3 SV=1	10.8333	1	1	1	1	120	13.207	7.99	49.89	1
P06310	Immunoglobulin kappa variable 2-30 OS=Homo sapiens GN=IGKV2-30 PE=3 SV=2	10.8333	1	1	1	1	120	13.177	8.51	49.89	1
A0A075B6P5	Immunoglobulin kappa variable 2-28 OS=Homo sapiens GN=IGKV2-28 PE=3 SV=1	10.8333	1	1	1	1	120	12.948	5.94	49.89	1
Q8N684	Cleavage and polyadenylation specificity factor subunit 7 OS=Homo sapiens GN=CPSF7 PE=1 SV=1	10.828	4	4	4	1	471	52.018	8	144.568	4
P01614	Immunoglobulin kappa variable 2D-40 OS=Homo sapiens GN=IGKV2D-40 PE=1 SV=2	10.7438	1	1	1	1	121	13.302	4.61	49.89	1
Q9Y6M1	Insulin-like growth factor 2 mRNA-binding protein 2 OS=Homo sapiens GN=IGF2BP2 PE=1 SV=2	10.6845	5	6	5	1	599	66.081	8.46	213.411	5
Q9H0G5	Nuclear speckle splicing regulatory protein 1 OS=Homo sapiens GN=NSRP1 PE=1 SV=1	10.5735	4	4	4	1	558	66.35	8.84	82.2839	4
A1E959	Odontogenic ameloblast-associated protein OS=Homo sapiens GN=ODAM PE=1 SV=1	10.3943	1	3	1	1	279	30.758	4.56	0	1
Q6ZN55	Zinc finger protein 574 OS=Homo sapiens GN=ZNF574 PE=1 SV=2	10.3795	6	6	6	1	896	98.837	8.07	346.943	6
Q86YZ3	Hornerin OS=Homo sapiens GN=HRNR PE=1 SV=2	10.3158	4	6	4	1	2850	282.228	10.04	154.727	4
Q6ZMS4	Zinc finger protein 852 OS=Homo sapiens GN=ZNF852 PE=1 SV=4	10.3131	3	4	2	1	543	62.044	8.12	108.092	3
P35268	60S ribosomal protein L22 OS=Homo sapiens GN=RPL22 PE=1 SV=2	10.1562	1	1	1	1	128	14.778	9.19	24.25	1
Q8N3J9	Zinc finger protein 664 OS=Homo sapiens GN=ZNF664 PE=2 SV=1	9.96169	1	2	1	1	261	30.263	8.69	88.91	1
Q03923	Zinc finger protein 85 OS=Homo sapiens GN=ZNF85 PE=1 SV=3	9.7479	2	2	1	1	595	68.691	9.32	28.954	2
P62805	Histone H4 OS=Homo sapiens GN=HIST1H4A PE=1 SV=2	9.70874	1	1	1	1	103	11.36	11.36	14.1	1
Q15637	Splicing factor 1 OS=Homo sapiens GN=SF1 PE=1 SV=4	9.54617	4	4	4	1	639	68.286	8.98	121.78	4
Q15776	Zinc finger protein with KRAB and SCAN domains 8 OS=Homo sapiens GN=ZKSCAN8 PE=1 SV=2	9.51557	4	12	3	1	578	65.775	7.39	78.995	4
Q96JF6	Zinc finger protein 594 OS=Homo sapiens GN=ZNF594 PE=2 SV=3	9.4176	5	6	5	1	807	93.847	8.7	110.193	5
Q15424	Scaffold attachment factor B1 OS=Homo sapiens GN=SAFB PE=1 SV=4	9.07104	5	8	5	1	915	102.58	5.47	446.035	5
Q13627	Dual specificity tyrosine-phosphorylation-regulated kinase 1A OS=Homo sapiens GN=DYRK1A PE=1 SV=2	9.04325	6	6	6	1	763	85.53	8.75	164.721	6
Q9Y388	RNA-binding motif protein, X-linked 2 OS=Homo sapiens GN=RBMX2 PE=1 SV=2	9.00621	2	2	2	1	322	37.313	9.83	47.17	2
Q16670	Zinc finger and SCAN domain-containing protein 26 OS=Homo sapiens GN=ZSCAN26 PE=1 SV=2	8.78661	3	3	3	1	478	55.219	8.06	34.51	3
Q9Y2Q1	Zinc finger protein 257 OS=Homo sapiens GN=ZNF257 PE=2 SV=2	8.52575	2	2	0	1	563	65.736	9.01	28.954	2
Q9NQ39	Putative 40S ribosomal protein S10-like OS=Homo sapiens GN=RPS10P5 PE=5 SV=1	8.52273	1	1	1	1	176	20.108	10.13	54.45	1
Q12834	Cell division cycle protein 20 homolog OS=Homo sapiens GN=CDC20 PE=1 SV=2	8.41683	3	3	3	1	499	54.689	9.23	115.663	3
P11142	Heat shock cognate 71 kDa protein OS=Homo sapiens GN=HSPA8 PE=1 SV=1	8.35913	4	4	4	1	646	70.854	5.52	122.72	4
Q9H8G1	Zinc finger protein 430 OS=Homo sapiens GN=ZNF430 PE=1 SV=3	8.24561	3	3	2	1	570	66.275	8.65	135.025	3
Q6ZNH5	Zinc finger protein 497 OS=Homo sapiens GN=ZNF497 PE=2 SV=2	8.23293	3	3	3	1	498	54.686	8.94	110.751	3
Q9Y2X9	Zinc finger protein 281 OS=Homo sapiens GN=ZNF281 PE=1 SV=1	8.15642	4	5	4	1	895	96.855	8.48	266.55	4
Q86XP3	ATP-dependent RNA helicase DDX42 OS=Homo sapiens GN=DDX42 PE=1 SV=1	7.99574	4	6	4	1	938	102.912	7.02	90.6	4
O75820	Zinc finger protein 189 OS=Homo sapiens GN=ZNF189 PE=1 SV=2	7.98722	5	5	5	1	626	72.929	8.5	136.38	5
A6NNF4	Zinc finger protein 726 OS=Homo sapiens GN=ZNF726 PE=2 SV=4	7.85908	2	2	1	1	738	85.483	9.09	28.954	2
P0C0S5	Histone H2A.Z OS=Homo sapiens GN=H2AFZ PE=1 SV=2	7.8125	1	1	1	1	128	13.545	10.58	49.42	1
Q71UI9	Histone H2A.V OS=Homo sapiens GN=H2AFV PE=1 SV=3	7.8125	1	1	1	1	128	13.501	10.58	49.42	1
Q6P3V2	Zinc finger protein 585A OS=Homo sapiens GN=ZNF585A PE=2 SV=2	7.80234	2	4	0	0	769	87.917	9.06	97.8025	2
O95201	Zinc finger protein 205 OS=Homo sapiens GN=ZNF205 PE=1 SV=2	7.76173	3	3	3	1	554	60.592	8.54	46.7	3
P62266	40S ribosomal protein S23 OS=Homo sapiens GN=RPS23 PE=1 SV=3	7.69231	1	1	1	1	143	15.798	10.49	68.2	1
Q15937	Zinc finger protein 79 OS=Homo sapiens GN=ZNF79 PE=1 SV=2	7.63052	3	4	2	1	498	55.314	8.18	146.284	3
Q8TAD8	Smad nuclear-interacting protein 1 OS=Homo sapiens GN=SNIP1 PE=1 SV=1	7.57576	2	2	2	1	396	45.75	9.99	82.06	2
O95409	Zinc finger protein ZIC 2 OS=Homo sapiens GN=ZIC2 PE=1 SV=2	7.5188	2	2	2	1	532	54.971	8.41	41.96	2
Q9HBT8	Zinc finger protein 286A OS=Homo sapiens GN=ZNF286A PE=1 SV=1	7.4856	3	4	1	1	521	60.136	8.32	90.8519	3
O95678	Keratin, type II cytoskeletal 75 OS=Homo sapiens GN=KRT75 PE=1 SV=2	7.44102	4	4	1	1	551	59.524	7.74	133.017	4
O60765	Zinc finger protein 354A OS=Homo sapiens GN=ZNF354A PE=2 SV=2	7.43802	3	3	2	1	605	69.193	9.57	61.5967	3
Q9NQZ8	Endothelial zinc finger protein induced by tumor necrosis factor alpha OS=Homo sapiens GN=ZNF71 PE=2 SV=1	7.36196	2	3	2	1	489	54.462	8.68	70.6767	2
P19544	Wilms tumor protein OS=Homo sapiens GN=WT1 PE=1 SV=2	7.12695	1	1	1	1	449	49.157	9	18.95	1
Q01546	Keratin, type II cytoskeletal 2 oral OS=Homo sapiens GN=KRT76 PE=1 SV=2	7.05329	6	6	2	1	638	65.8	8.12	150.59	6
Q14593	Zinc finger protein 273 OS=Homo sapiens GN=ZNF273 PE=1 SV=3	7.02988	4	4	2	0	569	64.929	9.54	79.496	4
P17027	Zinc finger protein 23 OS=Homo sapiens GN=ZNF23 PE=2 SV=3	6.99844	1	2	0	5	643	73.012	8.12	69.8413	1
Q9NSD4	Zinc finger protein 275 OS=Homo sapiens GN=ZNF275 PE=1 SV=2	6.99301	2	2	2	1	429	48.412	9.09	51.0272	2
Q6P1X5	Transcription initiation factor TFIID subunit 2 OS=Homo sapiens GN=TAF2 PE=1 SV=3	6.83903	5	5	5	1	1199	136.883	8.19	97.4332	5
P17021	Zinc finger protein 17 OS=Homo sapiens GN=ZNF17 PE=2 SV=3	6.79758	2	3	2	0	662	77.154	8.44	0	2
Q96NM4	TOX high mobility group box family member 2 OS=Homo sapiens GN=TOX2 PE=2 SV=2	6.7623	3	3	3	1	488	51.571	6.71	130.557	3
Q9Y2G7	Zinc finger protein 30 homolog OS=Homo sapiens GN=ZFP30 PE=2 SV=1	6.74374	2	2	2	1	519	61.518	8.91	50.14	2
P62277	40S ribosomal protein S13 OS=Homo sapiens GN=RPS13 PE=1 SV=2	6.62252	1	1	1	1	151	17.212	10.54	40.3	1
A6NHQ2	rRNA/tRNA 2'-O-methyltransferase fibrillarin-like protein 1 OS=Homo sapiens GN=FBLL1 PE=3 SV=2	6.58683	2	2	2	1	334	34.782	10.35	34.1312	2
P17023	Zinc finger protein 19 OS=Homo sapiens GN=ZNF19 PE=2 SV=4	6.55022	1	2	0	5	458	52.415	7.8	69.8413	1
P48741	Putative heat shock 70 kDa protein 7 OS=Homo sapiens GN=HSPA7 PE=5 SV=2	6.53951	2	2	2	1	367	40.22	7.87	76.65	2
Q5MCW4	Zinc finger protein 569 OS=Homo sapiens GN=ZNF569 PE=1 SV=1	6.41399	2	3	1	1	686	79.531	8.66	69.8413	2
Q7Z794	Keratin, type II cytoskeletal 1b OS=Homo sapiens GN=KRT77 PE=2 SV=3	6.40138	4	5	0	0	578	61.864	5.99	144.424	4
Q9UII5	Zinc finger protein 107 OS=Homo sapiens GN=ZNF107 PE=2 SV=1	6.3857	1	1	0	6	783	90.614	9.31	26.01	1
Q5JVG8	Zinc finger protein 506 OS=Homo sapiens GN=ZNF506 PE=2 SV=2	6.30631	2	2	0	1	444	51.503	9.29	28.954	2
P54652	Heat shock-related 70 kDa protein 2 OS=Homo sapiens GN=HSPA2 PE=1 SV=1	6.25978	3	3	3	1	639	69.978	5.74	115.15	3
Q8N823	Zinc finger protein 611 OS=Homo sapiens GN=ZNF611 PE=2 SV=2	6.24113	3	3	3	1	705	81.397	8.9	153.773	3
P34931	Heat shock 70 kDa protein 1-like OS=Homo sapiens GN=HSPA1L PE=1 SV=2	6.24025	3	3	3	1	641	70.331	6.02	115.15	3
Q07020	60S ribosomal protein L18 OS=Homo sapiens GN=RPL18 PE=1 SV=2	5.85106	1	1	1	1	188	21.621	11.72	36.04	1
Q9NV72	Zinc finger protein 701 OS=Homo sapiens GN=ZNF701 PE=2 SV=3	5.83804	3	3	2	1	531	60.864	9.28	81.0633	3
Q6ZNG1	Zinc finger protein 600 OS=Homo sapiens GN=ZNF600 PE=1 SV=2	5.81717	3	3	2	0	722	83.07	9.25	97.3153	3
O75437	Zinc finger protein 254 OS=Homo sapiens GN=ZNF254 PE=2 SV=3	5.76631	2	2	1	1	659	77.11	9.28	28.954	2
P12035	Keratin, type II cytoskeletal 3 OS=Homo sapiens GN=KRT3 PE=1 SV=3	5.73248	5	5	2	1	628	64.378	6.48	122.833	5
O15405	TOX high mobility group box family member 3 OS=Homo sapiens GN=TOX3 PE=1 SV=2	5.72917	3	3	3	1	576	63.302	7.85	130.557	3
Q9Y5A6	Zinc finger and SCAN domain-containing protein 21 OS=Homo sapiens GN=ZSCAN21 PE=1 SV=2	5.70825	2	5	1	1	473	53.624	7.72	81.2917	2
P57071	PR domain zinc finger protein 15 OS=Homo sapiens GN=PRDM15 PE=1 SV=4	5.7067	7	7	7	1	1507	169.161	8.24	161.799	7
P0CJ79	Zinc finger protein 888 OS=Homo sapiens GN=ZNF888 PE=3 SV=1	5.6	2	2	1	1	500	58.689	9.09	70.07	2
Q5JVF3	PCI domain-containing protein 2 OS=Homo sapiens GN=PCID2 PE=1 SV=2	5.51378	2	2	2	1	399	46	8.53	51.68	2
A2RRD8	Zinc finger protein 320 OS=Homo sapiens GN=ZNF320 PE=1 SV=1	5.50098	3	3	1	1	509	59.288	8.91	56.0687	3
Q4V348	Zinc finger protein 658B OS=Homo sapiens GN=ZNF658B PE=2 SV=1	5.49451	1	2	0	5	819	94.27	8.56	69.8413	1
Q969P6	DNA topoisomerase I, mitochondrial OS=Homo sapiens GN=TOP1MT PE=1 SV=1	5.49085	4	5	4	1	601	69.828	9.41	61.31	4
A6NN14	Zinc finger protein 729 OS=Homo sapiens GN=ZNF729 PE=2 SV=4	5.43131	2	2	0	1	1252	144.926	9.5	28.954	2
P05787	Keratin, type II cytoskeletal 8 OS=Homo sapiens GN=KRT8 PE=1 SV=7	5.38302	4	4	1	1	483	53.671	5.59	96.4108	4
P17032	Zinc finger protein 37A OS=Homo sapiens GN=ZNF37A PE=2 SV=3	5.34759	2	3	1	0	561	65.376	8.19	80.7339	2
Q96GE5	Zinc finger protein 799 OS=Homo sapiens GN=ZNF799 PE=2 SV=4	5.28771	2	2	2	1	643	74.24	9.09	110.798	2
Q9BTA9	WW domain-containing adapter protein with coiled-coil OS=Homo sapiens GN=WAC PE=1 SV=3	5.25502	1	1	1	1	647	70.681	9.45	0	1
P13646	Keratin, type I cytoskeletal 13 OS=Homo sapiens GN=KRT13 PE=1 SV=4	5.24017	3	8	2	0	458	49.557	4.96	293.758	3
E7ETH6	Zinc finger protein 587B OS=Homo sapiens GN=ZNF587B PE=1 SV=1	5.22388	1	1	1	1	402	45.512	8.38	17.85	1
Q9H707	Zinc finger protein 552 OS=Homo sapiens GN=ZNF552 PE=1 SV=2	5.15971	1	1	1	1	407	46.168	8.51	17.85	1
Q96L21	60S ribosomal protein L10-like OS=Homo sapiens GN=RPL10L PE=1 SV=3	5.14019	1	1	1	1	214	24.503	10.01	27.6	1
P27635	60S ribosomal protein L10 OS=Homo sapiens GN=RPL10 PE=1 SV=4	5.14019	1	1	1	1	214	24.588	10.08	27.6	1
Q8N7Q3	Zinc finger protein 676 OS=Homo sapiens GN=ZNF676 PE=2 SV=2	5.10204	1	1	0	6	588	67.58	8.87	26.01	1
Q8N9L1	Zinc finger protein ZIC 4 OS=Homo sapiens GN=ZIC4 PE=2 SV=3	5.08982	1	1	1	1	334	36.543	9.52	33.55	1
Q8TAQ5	Zinc finger protein 420 OS=Homo sapiens GN=ZNF420 PE=1 SV=1	5.08721	2	3	2	1	688	80.195	8.62	128.147	2
Q9Y2A4	Zinc finger protein 443 OS=Homo sapiens GN=ZNF443 PE=2 SV=2	5.06706	2	2	2	1	671	77.465	9.1	110.798	2
Q5XKE5	Keratin, type II cytoskeletal 79 OS=Homo sapiens GN=KRT79 PE=1 SV=2	5.04673	3	3	1	1	535	57.8	7.2	86.0342	3
Q6P9A1	Zinc finger protein 530 OS=Homo sapiens GN=ZNF530 PE=2 SV=2	5.00835	1	1	1	1	599	68.793	8.66	0	1
Q15929	Putative zinc finger protein 56 OS=Homo sapiens GN=ZNF56 PE=5 SV=2	4.96894	1	1	0	4	161	18.639	8.56	23.36	1
Q6ZN08	Putative zinc finger protein 66 OS=Homo sapiens GN=ZNF66 PE=5 SV=3	4.88656	2	2	0	1	573	65.831	9.33	28.954	2
Q05481	Zinc finger protein 91 OS=Homo sapiens GN=ZNF91 PE=2 SV=2	4.86986	2	2	1	1	1191	137.128	9.32	28.954	2
Q96SQ5	Zinc finger protein 587 OS=Homo sapiens GN=ZNF587 PE=1 SV=1	4.86957	2	2	2	1	575	65.58	8.92	30.4	2
P68400	Casein kinase II subunit alpha OS=Homo sapiens GN=CSNK2A1 PE=1 SV=1	4.85934	1	1	1	1	391	45.115	7.74	30.95	1
Q8NEV1	Casein kinase II subunit alpha 3 OS=Homo sapiens GN=CSNK2A3 PE=1 SV=2	4.85934	1	1	1	1	391	45.191	8.5	30.95	1
P25490	Transcriptional repressor protein YY1 OS=Homo sapiens GN=YY1 PE=1 SV=2	4.83092	1	1	1	1	414	44.685	6.25	78.22	1
P63261	Actin, cytoplasmic 2 OS=Homo sapiens GN=ACTG1 PE=1 SV=1	4.8	1	1	1	1	375	41.766	5.48	47.78	1
P60709	Actin, cytoplasmic 1 OS=Homo sapiens GN=ACTB PE=1 SV=1	4.8	1	1	1	1	375	41.71	5.48	47.78	1
Q3KQV3	Zinc finger protein 792 OS=Homo sapiens GN=ZNF792 PE=1 SV=2	4.74684	2	2	1	0	632	71.531	8.02	0	2
Q9NSY1	BMP-2-inducible protein kinase OS=Homo sapiens GN=BMP2K PE=1 SV=2	4.65116	4	4	4	1	1161	129.091	6.51	159.77	4
P00918	Carbonic anhydrase 2 OS=Homo sapiens GN=CA2 PE=1 SV=2	4.61538	1	1	1	1	260	29.228	7.4	58.88	1
P19012	Keratin, type I cytoskeletal 15 OS=Homo sapiens GN=KRT15 PE=1 SV=3	4.60526	2	2	0	2	456	49.181	4.77	86.4	2
Q9Y462	Zinc finger protein 711 OS=Homo sapiens GN=ZNF711 PE=1 SV=2	4.59921	2	2	2	1	761	86.19	6.87	153.17	2
Q02878	60S ribosomal protein L6 OS=Homo sapiens GN=RPL6 PE=1 SV=3	4.51389	1	1	1	1	288	32.708	10.58	28.36	1
Q8IYX0	Zinc finger protein 679 OS=Homo sapiens GN=ZNF679 PE=1 SV=2	4.37956	2	2	0	1	411	47.148	8.91	28.954	2
P0CB33	Putative zinc finger protein 735 OS=Homo sapiens GN=ZNF735 PE=5 SV=1	4.36893	2	2	0	1	412	47.534	9.11	28.954	2
Q96N22	Zinc finger protein 681 OS=Homo sapiens GN=ZNF681 PE=2 SV=2	4.34109	2	2	1	1	645	75.011	9.09	28.954	2
Q9UJW8	Zinc finger protein 180 OS=Homo sapiens GN=ZNF180 PE=1 SV=2	4.33526	1	3	0	0	692	79.061	7.8	68.1513	1
Q14CN4	Keratin, type II cytoskeletal 72 OS=Homo sapiens GN=KRT72 PE=1 SV=2	4.30528	2	2	1	1	511	55.842	6.89	79.4019	2
O43402	ER membrane protein complex subunit 8 OS=Homo sapiens GN=EMC8 PE=1 SV=1	4.28571	1	1	1	1	210	23.758	6.4	32.13	1
Q5TYW1	Zinc finger protein 658 OS=Homo sapiens GN=ZNF658 PE=2 SV=2	4.24929	2	5	0	0	1059	122.196	8.28	69.8413	2
Q14157	Ubiquitin-associated protein 2-like OS=Homo sapiens GN=UBAP2L PE=1 SV=2	4.13983	3	4	3	1	1087	114.465	7.11	89.72	3
P11021	78 kDa glucose-regulated protein OS=Homo sapiens GN=HSPA5 PE=1 SV=2	4.12844	2	2	2	1	654	72.288	5.16	84.31	2
Q99575	Ribonucleases P/MRP protein subunit POP1 OS=Homo sapiens GN=POP1 PE=1 SV=2	4.10156	3	3	3	1	1024	114.636	9.22	85.4898	3
Q7Z3Z0	Keratin, type I cytoskeletal 25 OS=Homo sapiens GN=KRT25 PE=1 SV=1	4	2	5	1	1	450	49.287	5.08	223.286	2
Q9P0L1	Zinc finger protein with KRAB and SCAN domains 7 OS=Homo sapiens GN=ZKSCAN7 PE=1 SV=2	3.97878	1	2	0	5	754	84.979	7.47	69.8413	1
Q5SW79	Centrosomal protein of 170 kDa OS=Homo sapiens GN=CEP170 PE=1 SV=1	3.97727	4	4	4	1	1584	175.187	7.11	149.09	4
P0CG24	Zinc finger protein 883 OS=Homo sapiens GN=ZNF883 PE=2 SV=1	3.95778	1	2	0	5	379	43.938	8.69	69.8413	1
Q7Z3Y8	Keratin, type I cytoskeletal 27 OS=Homo sapiens GN=KRT27 PE=1 SV=2	3.92157	2	5	1	1	459	49.792	5.05	223.286	2
Q52M93	Zinc finger protein 585B OS=Homo sapiens GN=ZNF585B PE=2 SV=1	3.90117	1	2	0	2	769	88.009	9.04	97.8025	1
Q96H40	Zinc finger protein 486 OS=Homo sapiens GN=ZNF486 PE=2 SV=4	3.88769	2	2	0	1	463	53.596	9.1	28.954	2
Q7Z3Y7	Keratin, type I cytoskeletal 28 OS=Homo sapiens GN=KRT28 PE=1 SV=2	3.87931	2	5	1	1	464	50.536	5.47	223.286	2
Q9Y2L9	Leucine-rich repeat and calponin homology domain-containing protein 1 OS=Homo sapiens GN=LRCH1 PE=1 SV=3	3.84615	2	2	2	1	728	80.824	5.94	108.559	2
Q9UN81	LINE-1 retrotransposable element ORF1 protein OS=Homo sapiens GN=L1RE1 PE=1 SV=1	3.84615	1	1	1	1	338	40.031	9.51	49.57	1
Q15915	Zinc finger protein ZIC 1 OS=Homo sapiens GN=ZIC1 PE=1 SV=2	3.80313	1	1	1	1	447	48.278	8.44	33.55	1
Q15928	Zinc finger protein 141 OS=Homo sapiens GN=ZNF141 PE=1 SV=1	3.79747	2	2	0	1	474	55.214	9.31	28.954	2
Q68DY1	Zinc finger protein 626 OS=Homo sapiens GN=ZNF626 PE=2 SV=2	3.78788	1	1	0	6	528	60.853	9.1	26.01	1
Q8NB42	Zinc finger protein 527 OS=Homo sapiens GN=ZNF527 PE=2 SV=2	3.77668	2	4	0	0	609	70.856	8.03	73.605	2
P0DMV9	Heat shock 70 kDa protein 1B OS=Homo sapiens GN=HSPA1B PE=1 SV=1	3.74415	2	2	2	1	641	70.009	5.66	76.65	2
P17066	Heat shock 70 kDa protein 6 OS=Homo sapiens GN=HSPA6 PE=1 SV=2	3.7325	2	2	2	1	643	70.984	6.14	76.65	2
Q96NG5	Zinc finger protein 558 OS=Homo sapiens GN=ZNF558 PE=2 SV=1	3.73134	1	2	0	2	402	45.726	8.95	97.8025	1
Q8IYN0	Zinc finger protein 100 OS=Homo sapiens GN=ZNF100 PE=2 SV=2	3.69004	2	2	1	1	542	62.704	8.94	45.244	2
P51814	Zinc finger protein 41 OS=Homo sapiens GN=ZNF41 PE=1 SV=2	3.65408	1	2	0	2	821	93.668	8.79	97.8025	1
O60481	Zinc finger protein ZIC 3 OS=Homo sapiens GN=ZIC3 PE=1 SV=1	3.64026	1	1	1	1	467	50.537	8.65	33.55	1
Q9UJN7	Zinc finger protein 391 OS=Homo sapiens GN=ZNF391 PE=2 SV=2	3.63128	1	1	1	1	358	40.634	8.6	0	1
O94900	Thymocyte selection-associated high mobility group box protein TOX OS=Homo sapiens GN=TOX PE=2 SV=3	3.61217	2	2	2	1	526	57.476	7.33	56.26	2
Q9NYV4	Cyclin-dependent kinase 12 OS=Homo sapiens GN=CDK12 PE=1 SV=2	3.55705	3	4	3	1	1490	164.054	9.44	159.31	3
Q7Z398	Zinc finger protein 550 OS=Homo sapiens GN=ZNF550 PE=1 SV=2	3.5545	1	1	0	0	422	48.35	8.63	0	1
Q5JVG2	Zinc finger protein 484 OS=Homo sapiens GN=ZNF484 PE=1 SV=1	3.52113	1	2	0	2	852	98.158	8.32	97.8025	1
Q8TD23	Zinc finger protein 675 OS=Homo sapiens GN=ZNF675 PE=1 SV=3	3.52113	1	1	0	6	568	66.256	8.87	26.01	1
P52741	Zinc finger protein 134 OS=Homo sapiens GN=ZNF134 PE=2 SV=2	3.51288	1	1	1	1	427	48.448	8.63	0	1
Q8TF32	Zinc finger protein 431 OS=Homo sapiens GN=ZNF431 PE=2 SV=2	3.47222	1	1	0	6	576	67.173	8.76	26.01	1
P17038	Zinc finger protein 43 OS=Homo sapiens GN=ZNF43 PE=2 SV=4	3.46106	2	2	1	1	809	94.063	9.19	28.954	2
Q96JC4	Zinc finger protein 479 OS=Homo sapiens GN=ZNF479 PE=2 SV=1	3.43511	2	2	0	1	524	60.559	8.95	28.954	2
Q13106	Zinc finger protein 154 OS=Homo sapiens GN=ZNF154 PE=2 SV=3	3.43249	1	2	1	1	437	49.833	8.81	49.065	1
Q5VX52	Spermatogenesis-associated protein 1 OS=Homo sapiens GN=SPATA1 PE=2 SV=3	3.43249	1	2	1	1	437	50.276	8.43	0	1
Q96LW1	Zinc finger protein 354B OS=Homo sapiens GN=ZNF354B PE=2 SV=1	3.43137	2	2	1	1	612	70.484	9.5	50.07	2
Q96IR2	Zinc finger protein 845 OS=Homo sapiens GN=ZNF845 PE=2 SV=3	3.40206	3	6	1	0	970	113.06	9.33	102.762	3
Q8NCK3	Zinc finger protein 485 OS=Homo sapiens GN=ZNF485 PE=2 SV=1	3.40136	1	4	0	2	441	50.248	9.6	69.8413	1
O75373	Zinc finger protein 737 OS=Homo sapiens GN=ZNF737 PE=2 SV=3	3.35821	2	2	1	1	536	61.891	9.26	28.954	2
Q8NFD5	AT-rich interactive domain-containing protein 1B OS=Homo sapiens GN=ARID1B PE=1 SV=2	3.3542	4	4	4	1	2236	235.974	6.73	143.64	4
O43660	Pleiotropic regulator 1 OS=Homo sapiens GN=PLRG1 PE=1 SV=1	3.30739	1	1	1	1	514	57.158	9.17	41.25	1
Q6ZN57	Zinc finger protein 2 homolog OS=Homo sapiens GN=ZFP2 PE=1 SV=1	3.2538	1	1	0	0	461	52.706	8.56	24.51	1
P14923	Junction plakoglobin OS=Homo sapiens GN=JUP PE=1 SV=3	3.22148	2	2	2	1	745	81.693	6.14	83.8	2
Q3ZCT1	Zinc finger protein 260 OS=Homo sapiens GN=ZNF260 PE=1 SV=3	3.15534	1	1	1	1	412	47.191	9.07	0	1
A6NK75	Zinc finger protein 98 OS=Homo sapiens GN=ZNF98 PE=2 SV=4	3.14685	2	2	1	1	572	65.756	9.17	28.954	2
Q3SY52	Zinc finger protein interacting with ribonucleoprotein K OS=Homo sapiens GN=ZIK1 PE=2 SV=1	3.08008	1	1	1	1	487	54.751	8.79	0	1
B4DXR9	Zinc finger protein 732 OS=Homo sapiens GN=ZNF732 PE=2 SV=1	3.07692	2	2	0	1	585	67.796	8.98	28.954	2
Q86W11	Zinc finger and SCAN domain-containing protein 30 OS=Homo sapiens GN=ZSCAN30 PE=1 SV=1	3.03644	1	2	0	5	494	56.328	6.7	69.8413	1
P19013	Keratin, type II cytoskeletal 4 OS=Homo sapiens GN=KRT4 PE=1 SV=4	2.99625	2	2	0	2	534	57.25	6.61	62.9893	2
Q96NJ6	Zinc finger protein 3 homolog OS=Homo sapiens GN=ZFP3 PE=2 SV=1	2.98805	1	2	0	5	502	57.625	7.34	69.8413	1
P16415	Zinc finger protein 823 OS=Homo sapiens GN=ZNF823 PE=2 SV=2	2.95082	1	2	1	1	610	70.225	8.72	0	1
P0DKX0	Zinc finger protein 728 OS=Homo sapiens GN=ZNF728 PE=3 SV=1	2.89389	2	2	1	1	622	71.754	9.14	28.954	2
Q6P1W5	Uncharacterized protein C1orf94 OS=Homo sapiens GN=C1orf94 PE=1 SV=2	2.84281	1	1	1	1	598	65.312	8.28	0	1
Q8IVS2	Malonyl-CoA-acyl carrier protein transacylase, mitochondrial OS=Homo sapiens GN=MCAT PE=1 SV=2	2.82051	1	1	1	1	390	42.934	8.72	38.29	1
Q8NF99	Zinc finger protein 397 OS=Homo sapiens GN=ZNF397 PE=1 SV=2	2.80899	1	2	0	5	534	61.1	7.27	69.8413	1
Q8TAQ2	SWI/SNF complex subunit SMARCC2 OS=Homo sapiens GN=SMARCC2 PE=1 SV=1	2.80066	3	3	3	1	1214	132.797	5.69	65.8233	3
Q969J2	Zinc finger protein with KRAB and SCAN domains 4 OS=Homo sapiens GN=ZKSCAN4 PE=1 SV=1	2.75229	1	1	1	1	545	61.54	7.61	37.81	1
Q96SE7	Zinc finger protein 347 OS=Homo sapiens GN=ZNF347 PE=1 SV=2	2.74136	2	3	0	0	839	95.709	9.17	23.36	2
Q86Y25	Zinc finger protein 354C OS=Homo sapiens GN=ZNF354C PE=2 SV=1	2.70758	1	6	1	1	554	64.805	8.05	68.1513	1
B4DU55	Zinc finger protein 879 OS=Homo sapiens GN=ZNF879 PE=2 SV=2	2.6643	1	1	0	0	563	64.536	9.54	0	1
P51654	Glypican-3 OS=Homo sapiens GN=GPC3 PE=1 SV=1	2.58621	1	4	1	1	580	65.52	6.37	0	1
Q8N883	Zinc finger protein 614 OS=Homo sapiens GN=ZNF614 PE=1 SV=2	2.5641	1	2	0	5	585	67.171	9.04	69.8413	1
Q96T25	Zinc finger protein ZIC 5 OS=Homo sapiens GN=ZIC5 PE=1 SV=2	2.5641	1	1	1	1	663	68.404	8.76	33.55	1
O75467	Zinc finger protein 324A OS=Homo sapiens GN=ZNF324 PE=2 SV=1	2.53165	1	1	1	1	553	61.066	9.57	49.12	1
Q96PQ6	Zinc finger protein 317 OS=Homo sapiens GN=ZNF317 PE=1 SV=2	2.52101	1	2	0	2	595	67.915	8.98	97.8025	1
Q6ZMS7	Protein ZNF783 OS=Homo sapiens GN=ZNF783 PE=1 SV=1	2.4911	1	1	1	1	281	31.403	4.96	14.29	1
B7Z6K7	Putative uncharacterized zinc finger protein 814 OS=Homo sapiens GN=ZNF814 PE=1 SV=2	2.45614	1	1	1	1	855	97.275	8.85	17.85	1
P52746	Zinc finger protein 142 OS=Homo sapiens GN=ZNF142 PE=1 SV=4	2.43035	2	4	2	1	1687	187.758	7.91	170.31	2
O60885	Bromodomain-containing protein 4 OS=Homo sapiens GN=BRD4 PE=1 SV=2	2.42291	2	2	2	1	1362	152.124	9.19	0	2
O00425	Insulin-like growth factor 2 mRNA-binding protein 3 OS=Homo sapiens GN=IGF2BP3 PE=1 SV=2	2.41796	1	1	1	1	579	63.666	8.87	56.76	1
Q7Z6E9	E3 ubiquitin-protein ligase RBBP6 OS=Homo sapiens GN=RBBP6 PE=1 SV=1	2.39955	4	4	4	1	1792	201.442	9.64	104.13	4
Q9BX82	Zinc finger protein 471 OS=Homo sapiens GN=ZNF471 PE=2 SV=1	2.39617	1	1	1	1	626	72.961	8.56	0	1
P52655	Transcription initiation factor IIA subunit 1 OS=Homo sapiens GN=GTF2A1 PE=1 SV=1	2.39362	1	1	1	1	376	41.488	4.55	39.56	1
A8MQ14	Zinc finger protein 850 OS=Homo sapiens GN=ZNF850 PE=3 SV=2	2.38532	1	1	1	1	1090	125.35	8.7	94.09	1
Q3ZCX4	Zinc finger protein 568 OS=Homo sapiens GN=ZNF568 PE=2 SV=2	2.32919	1	1	0	0	644	74.32	8.22	0	1
Q9NX05	Constitutive coactivator of PPAR-gamma-like protein 2 OS=Homo sapiens GN=FAM120C PE=2 SV=3	2.28102	2	2	2	1	1096	120.511	9.03	90.33	2
P51508	Zinc finger protein 81 OS=Homo sapiens GN=ZNF81 PE=1 SV=3	2.26929	1	2	0	2	661	75.911	8.68	97.8025	1
Q8TAU3	Zinc finger protein 417 OS=Homo sapiens GN=ZNF417 PE=1 SV=2	2.26087	1	1	1	1	575	65.691	9.06	30.4	1
P08727	Keratin, type I cytoskeletal 19 OS=Homo sapiens GN=KRT19 PE=1 SV=4	2.25	1	1	0	2	400	44.079	5.14	32.48	1
P55316	Forkhead box protein G1 OS=Homo sapiens GN=FOXG1 PE=1 SV=2	2.24949	1	1	1	1	489	52.32	8.87	75.47	1
Q7Z340	Zinc finger protein 551 OS=Homo sapiens GN=ZNF551 PE=1 SV=3	2.23881	1	1	1	1	670	77.465	8.35	0	1
P59923	Zinc finger protein 445 OS=Homo sapiens GN=ZNF445 PE=1 SV=1	2.23084	2	3	0	0	1031	118.887	9.39	103.457	2
Q499Z4	Zinc finger protein 672 OS=Homo sapiens GN=ZNF672 PE=2 SV=2	2.21239	1	1	1	1	452	50.192	9.89	42.1	1
Q9HCZ1	Zinc finger protein 334 OS=Homo sapiens GN=ZNF334 PE=2 SV=2	2.20588	1	3	0	0	680	79.597	9.16	68.1513	1
Q6NSZ9	Zinc finger and SCAN domain-containing protein 25 OS=Homo sapiens GN=ZSCAN25 PE=1 SV=3	2.20588	1	1	1	1	544	61.435	7.72	0	1
Q9H7H0	Methyltransferase-like protein 17, mitochondrial OS=Homo sapiens GN=METTL17 PE=1 SV=1	2.19298	1	1	1	1	456	50.701	9.33	36.66	1
P17014	Zinc finger protein 12 OS=Homo sapiens GN=ZNF12 PE=1 SV=3	2.15208	1	2	1	1	697	81.149	7.84	0	1
Q9Y473	Zinc finger protein 175 OS=Homo sapiens GN=ZNF175 PE=1 SV=1	2.1097	1	2	0	2	711	81.557	8.66	97.8025	1
Q2M2I5	Keratin, type I cytoskeletal 24 OS=Homo sapiens GN=KRT24 PE=1 SV=1	2.09524	1	3	1	1	525	55.053	4.96	155.255	1
Q04695	Keratin, type I cytoskeletal 17 OS=Homo sapiens GN=KRT17 PE=1 SV=2	2.08333	1	1	0	2	432	48.076	5.02	32.48	1
P26599	Polypyrimidine tract-binding protein 1 OS=Homo sapiens GN=PTBP1 PE=1 SV=1	2.07156	1	1	1	1	531	57.186	9.17	42.2	1
Q9Y463	Dual specificity tyrosine-phosphorylation-regulated kinase 1B OS=Homo sapiens GN=DYRK1B PE=1 SV=1	2.06677	1	1	1	1	629	69.154	9.13	83.27	1
Q9Y383	Putative RNA-binding protein Luc7-like 2 OS=Homo sapiens GN=LUC7L2 PE=1 SV=2	2.04082	1	1	1	1	392	46.486	10.01	0	1
Q92576	PHD finger protein 3 OS=Homo sapiens GN=PHF3 PE=1 SV=3	2.01079	2	2	2	1	2039	229.339	6.96	60.6	2
Q7Z3Y9	Keratin, type I cytoskeletal 26 OS=Homo sapiens GN=KRT26 PE=1 SV=2	1.92308	1	3	0	3	468	51.878	4.92	184.596	1
Q969X6	U3 small nucleolar RNA-associated protein 4 homolog OS=Homo sapiens GN=UTP4 PE=1 SV=1	1.89504	1	1	1	1	686	76.841	8.85	73.8	1
Q9P255	Zinc finger protein 492 OS=Homo sapiens GN=ZNF492 PE=2 SV=2	1.88324	1	1	0	6	531	61.118	9.25	26.01	1
Q5FWF6	Zinc finger protein 789 OS=Homo sapiens GN=ZNF789 PE=2 SV=3	1.88235	1	1	0	4	425	49.952	9.1	23.36	1
O43167	Zinc finger and BTB domain-containing protein 24 OS=Homo sapiens GN=ZBTB24 PE=1 SV=2	1.86514	1	1	1	1	697	78.233	7.61	73.53	1
Q8N859	Zinc finger protein 713 OS=Homo sapiens GN=ZNF713 PE=2 SV=1	1.86047	1	1	0	4	430	50.14	6.98	23.36	1
Q9UJW7	Zinc finger protein 229 OS=Homo sapiens GN=ZNF229 PE=2 SV=3	1.81818	1	3	1	1	825	93.647	8.53	52.3903	1
Q96N38	Zinc finger protein 714 OS=Homo sapiens GN=ZNF714 PE=2 SV=3	1.80505	1	1	0	6	554	63.842	9.1	26.01	1
Q8IY63	Angiomotin-like protein 1 OS=Homo sapiens GN=AMOTL1 PE=1 SV=1	1.77824	2	2	2	1	956	106.508	7.11	73.6332	2
Q9UPW0	Forkhead box protein J3 OS=Homo sapiens GN=FOXJ3 PE=1 SV=2	1.76849	1	1	1	1	622	68.917	7.09	51.95	1
Q8N9Z0	Zinc finger protein 610 OS=Homo sapiens GN=ZNF610 PE=2 SV=2	1.7316	1	1	0	4	462	53.455	9.2	23.36	1
Q92922	SWI/SNF complex subunit SMARCC1 OS=Homo sapiens GN=SMARCC1 PE=1 SV=3	1.71946	2	2	2	1	1105	122.79	5.76	33.75	2
Q5HY98	Zinc finger protein 766 OS=Homo sapiens GN=ZNF766 PE=2 SV=1	1.7094	1	1	0	4	468	54.472	9.45	23.36	1
Q96N58	Zinc finger protein 578 OS=Homo sapiens GN=ZNF578 PE=2 SV=2	1.69492	1	1	0	6	590	68.486	8.95	26.01	1
Q3SXZ3	Zinc finger protein 718 OS=Homo sapiens GN=ZNF718 PE=2 SV=1	1.67364	1	1	0	4	478	55.369	9.45	23.36	1
Q15935	Zinc finger protein 77 OS=Homo sapiens GN=ZNF77 PE=2 SV=2	1.65138	1	1	1	1	545	61.923	8.69	42.72	1
Q9UJU3	Zinc finger protein 112 OS=Homo sapiens GN=ZNF112 PE=2 SV=2	1.64294	1	1	0	0	913	105.775	8.27	0	1
Q9NSG2	Uncharacterized protein C1orf112 OS=Homo sapiens GN=C1orf112 PE=1 SV=1	1.64127	1	1	1	1	853	96.492	6	0	1
A6NP11	Zinc finger protein 716 OS=Homo sapiens GN=ZNF716 PE=2 SV=4	1.61616	1	1	0	4	495	56.969	9.17	23.36	1
O75346	Zinc finger protein 253 OS=Homo sapiens GN=ZNF253 PE=2 SV=2	1.60321	1	1	0	4	499	57.565	9.16	23.36	1
P17017	Zinc finger protein 14 OS=Homo sapiens GN=ZNF14 PE=2 SV=3	1.55763	1	1	1	1	642	75.304	9.17	28.03	1
Q8IW36	Zinc finger protein 695 OS=Homo sapiens GN=ZNF695 PE=1 SV=4	1.5534	1	1	0	4	515	60.109	8.65	23.36	1
Q6ZR52	Zinc finger protein 493 OS=Homo sapiens GN=ZNF493 PE=2 SV=3	1.54799	1	1	0	6	646	75.293	9.31	26.01	1
Q6PCB5	Round spermatid basic protein 1-like protein OS=Homo sapiens GN=RSBN1L PE=1 SV=2	1.53664	1	1	1	1	846	94.81	8.78	48.33	1
Q5VIY5	Zinc finger protein 468 OS=Homo sapiens GN=ZNF468 PE=2 SV=1	1.53257	1	1	0	4	522	60.534	8.82	23.36	1
Q7L2R6	Zinc finger protein 765 OS=Homo sapiens GN=ZNF765 PE=1 SV=2	1.52964	1	1	0	4	523	61.594	8.6	23.36	1
Q02413	Desmoglein-1 OS=Homo sapiens GN=DSG1 PE=1 SV=2	1.52526	1	1	1	1	1049	113.676	5.03	21.99	1
Q8WV37	Zinc finger protein 480 OS=Homo sapiens GN=ZNF480 PE=1 SV=2	1.49533	1	1	0	4	535	61.669	9.06	23.36	1
P08729	Keratin, type II cytoskeletal 7 OS=Homo sapiens GN=KRT7 PE=1 SV=5	1.49254	1	1	0	3	469	51.354	5.48	38.39	1
Q9BRH9	Zinc finger protein 251 OS=Homo sapiens GN=ZNF251 PE=2 SV=4	1.49031	1	1	0	6	671	75.716	9.17	26.01	1
Q8TB69	Zinc finger protein 519 OS=Homo sapiens GN=ZNF519 PE=2 SV=2	1.48148	1	1	0	4	540	62.979	9.36	23.36	1
A8MT65	Zinc finger protein 891 OS=Homo sapiens GN=ZNF891 PE=2 SV=2	1.47059	1	1	0	4	544	63.55	8.73	23.36	1
Q5EBL2	Zinc finger protein 628 OS=Homo sapiens GN=ZNF628 PE=1 SV=3	1.41643	1	1	1	1	1059	110.816	8.29	25.96	1
Q86XU0	Zinc finger protein 677 OS=Homo sapiens GN=ZNF677 PE=2 SV=1	1.36986	1	1	0	4	584	67.953	9.13	23.36	1
Q9NSB4	Keratin, type II cuticular Hb2 OS=Homo sapiens GN=KRT82 PE=3 SV=3	1.36452	1	1	0	0	513	56.616	6.74	38.39	1
Q3SY84	Keratin, type II cytoskeletal 71 OS=Homo sapiens GN=KRT71 PE=1 SV=3	1.33843	1	1	0	3	523	57.256	6.61	38.39	1
Q03938	Zinc finger protein 90 OS=Homo sapiens GN=ZNF90 PE=2 SV=3	1.33111	1	1	0	4	601	69.013	9.22	23.36	1
Q7RTS7	Keratin, type II cytoskeletal 74 OS=Homo sapiens GN=KRT74 PE=1 SV=2	1.32325	1	1	0	3	529	57.83	7.71	38.39	1
Q5SVQ8	Zinc finger and BTB domain-containing protein 41 OS=Homo sapiens GN=ZBTB41 PE=1 SV=1	1.32013	1	1	1	1	909	105.125	7.93	21.14	1
P02768	Serum albumin OS=Homo sapiens GN=ALB PE=1 SV=2	1.31363	1	1	1	1	609	69.321	6.28	44.83	1
Q6ZN06	Zinc finger protein 813 OS=Homo sapiens GN=ZNF813 PE=2 SV=2	1.2966	1	1	0	4	617	71.674	9.36	23.36	1
Q86Y46	Keratin, type II cytoskeletal 73 OS=Homo sapiens GN=KRT73 PE=1 SV=1	1.2963	1	1	0	3	540	58.887	7.23	38.39	1
P17039	Zinc finger protein 30 OS=Homo sapiens GN=ZNF30 PE=2 SV=5	1.28411	1	1	0	4	623	71.371	9.07	23.36	1
O15014	Zinc finger protein 609 OS=Homo sapiens GN=ZNF609 PE=1 SV=2	1.27569	1	1	1	1	1411	151.098	8.03	57.05	1
Q3MIS6	Zinc finger protein 528 OS=Homo sapiens GN=ZNF528 PE=2 SV=1	1.27389	1	1	0	4	628	72.092	9.19	23.36	1
O14628	Zinc finger protein 195 OS=Homo sapiens GN=ZNF195 PE=1 SV=2	1.27186	1	1	0	4	629	72.285	8.09	23.36	1
Q2M2I8	AP2-associated protein kinase 1 OS=Homo sapiens GN=AAK1 PE=1 SV=3	1.2487	1	1	1	1	961	103.821	6.6	37.86	1
Q8IYB9	Zinc finger protein 595 OS=Homo sapiens GN=ZNF595 PE=2 SV=1	1.23457	1	1	0	4	648	74.242	9.11	23.36	1
Q86YE8	Zinc finger protein 573 OS=Homo sapiens GN=ZNF573 PE=2 SV=4	1.20301	1	1	0	4	665	78.131	9.16	23.36	1
Q96JL9	Zinc finger protein 333 OS=Homo sapiens GN=ZNF333 PE=2 SV=3	1.20301	1	1	0	4	665	75.496	7.94	23.36	1
Q8WXX7	Autism susceptibility gene 2 protein OS=Homo sapiens GN=AUTS2 PE=1 SV=1	1.19142	1	1	1	1	1259	138.897	9.38	30.8	1
Q76KX8	Zinc finger protein 534 OS=Homo sapiens GN=ZNF534 PE=2 SV=1	1.18694	1	1	0	4	674	77.117	9.25	23.36	1
Q86V71	Zinc finger protein 429 OS=Homo sapiens GN=ZNF429 PE=2 SV=2	1.18694	1	1	1	1	674	78.102	9.39	23.36	1
Q9NSB2	Keratin, type II cuticular Hb4 OS=Homo sapiens GN=KRT84 PE=2 SV=2	1.16667	1	1	0	3	600	64.801	7.56	38.39	1
P08048	Zinc finger Y-chromosomal protein OS=Homo sapiens GN=ZFY PE=1 SV=3	1.1236	1	1	1	1	801	90.447	6.06	56.8	1
P17010	Zinc finger X-chromosomal protein OS=Homo sapiens GN=ZFX PE=2 SV=2	1.11801	1	1	1	1	805	90.464	6.14	56.8	1
P17035	Zinc finger protein 28 OS=Homo sapiens GN=ZNF28 PE=2 SV=5	1.11421	1	1	0	4	718	83.604	9.03	23.36	1
Q8N4W9	Zinc finger protein 808 OS=Homo sapiens GN=ZNF808 PE=2 SV=2	1.10742	1	1	0	6	903	104.757	9.48	26.01	1
Q86XN6	Zinc finger protein 761 OS=Homo sapiens GN=ZNF761 PE=2 SV=2	1.07239	1	1	0	4	746	87.662	9	23.36	1
Q9UKJ3	G patch domain-containing protein 8 OS=Homo sapiens GN=GPATCH8 PE=1 SV=2	1.06525	1	1	1	1	1502	164.098	8.66	14.19	1
Q08AN1	Zinc finger protein 616 OS=Homo sapiens GN=ZNF616 PE=2 SV=2	1.02433	1	1	0	4	781	90.215	9.57	23.36	1
A8MXY4	Zinc finger protein 99 OS=Homo sapiens GN=ZNF99 PE=2 SV=3	0.925926	1	1	1	1	864	100.725	9.45	23.36	1
Q9P2J8	Zinc finger protein 624 OS=Homo sapiens GN=ZNF624 PE=1 SV=3	0.924855	1	1	0	4	865	99.864	8.88	23.36	1
Q9Y2J4	Angiomotin-like protein 2 OS=Homo sapiens GN=AMOTL2 PE=1 SV=3	0.898588	1	1	1	1	779	85.713	7.3	40.76	1
Q92833	Protein Jumonji OS=Homo sapiens GN=JARID2 PE=1 SV=2	0.882825	1	1	1	1	1246	138.648	9.38	60.22	1
O14497	AT-rich interactive domain-containing protein 1A OS=Homo sapiens GN=ARID1A PE=1 SV=3	0.83151	1	1	1	1	2285	241.892	6.7	95.5	1
Q8IZH2	5'-3' exoribonuclease 1 OS=Homo sapiens GN=XRN1 PE=1 SV=1	0.820633	1	1	1	1	1706	193.985	7.21	70.99	1
O14646	Chromodomain-helicase-DNA-binding protein 1 OS=Homo sapiens GN=CHD1 PE=1 SV=2	0.818713	1	1	1	1	1710	196.567	7.14	0	1
Q5D862	Filaggrin-2 OS=Homo sapiens GN=FLG2 PE=1 SV=1	0.794647	1	1	1	1	2391	247.928	8.31	59.2	1
P42694	Probable helicase with zinc finger domain OS=Homo sapiens GN=HELZ PE=1 SV=2	0.669413	1	1	1	1	1942	218.833	7.42	78.95	1
O43345	Zinc finger protein 208 OS=Homo sapiens GN=ZNF208 PE=2 SV=2	0.625	1	1	1	1	1280	147.39	9.01	23.36	1
Q8WXH0	Nesprin-2 OS=Homo sapiens GN=SYNE2 PE=1 SV=3	0.421206	1	1	1	1	6885	795.944	5.36	0	1
Q8WZ42	Titin OS=Homo sapiens GN=TTN PE=1 SV=4	0.0203785	1	3	1	1	34350	3813.65	6.35	0	1

## Sheet: NleE K219Azi(1)
Accession	Description	Coverage	# Peptides	# PSMs	# Unique Peptides	# Protein Groups	# AAs	MW [kDa]	calc. pI	Score Mascot	# Peptides Mascot
Q15233	Non-POU domain-containing octamer-binding protein OS=Homo sapiens GN=NONO PE=1 SV=4	73.4607	33	105	32	1	471	54.197	8.95	3211.13	33
P35527	Keratin, type I cytoskeletal 9 OS=Homo sapiens GN=KRT9 PE=1 SV=3	57.7849	31	53	31	1	623	62.027	5.24	2763.61	31
Q8WWM7	Ataxin-2-like protein OS=Homo sapiens GN=ATXN2L PE=1 SV=2	45.4884	38	78	38	1	1075	113.304	8.59	2761.8	38
P04264	Keratin, type II cytoskeletal 1 OS=Homo sapiens GN=KRT1 PE=1 SV=6	50.3106	36	60	33	1	644	65.999	8.12	2745.74	36
Q7Z417	Nuclear fragile X mental retardation-interacting protein 2 OS=Homo sapiens GN=NUFIP2 PE=1 SV=1	55.2518	31	63	31	1	695	76.075	8.7	2330.88	31
Q99700	Ataxin-2 OS=Homo sapiens GN=ATXN2 PE=1 SV=2	28.5605	30	47	30	1	1313	140.196	9.57	2043.67	30
P35908	Keratin, type II cytoskeletal 2 epidermal OS=Homo sapiens GN=KRT2 PE=1 SV=2	57.903	32	39	26	1	639	65.393	8	1864.86	32
P14866	Heterogeneous nuclear ribonucleoprotein L OS=Homo sapiens GN=HNRNPL PE=1 SV=2	56.0272	26	49	26	1	589	64.092	8.22	1832.21	26
P13645	Keratin, type I cytoskeletal 10 OS=Homo sapiens GN=KRT10 PE=1 SV=6	43.3219	28	45	26	1	584	58.792	5.21	1816	28
P11387	DNA topoisomerase 1 OS=Homo sapiens GN=TOP1 PE=1 SV=2	45.2288	35	53	35	1	765	90.669	9.31	1759.16	35
Q9UG63	ATP-binding cassette sub-family F member 2 OS=Homo sapiens GN=ABCF2 PE=1 SV=2	53.9326	30	43	30	1	623	71.245	7.37	1271.69	30
P46776	60S ribosomal protein L27a OS=Homo sapiens GN=RPL27A PE=1 SV=2	40.5405	9	35	9	1	148	16.551	11	1257.54	9
Q7L2J0	7SK snRNA methylphosphate capping enzyme OS=Homo sapiens GN=MEPCE PE=1 SV=1	53.4107	27	40	27	1	689	74.31	9.57	1222.63	27
Q96EV2	RNA-binding protein 33 OS=Homo sapiens GN=RBM33 PE=1 SV=3	32.906	22	39	22	1	1170	129.906	6.93	1167.37	22
Q8IWS0	PHD finger protein 6 OS=Homo sapiens GN=PHF6 PE=1 SV=1	61.0959	16	29	16	1	365	41.264	8.68	1153.55	16
P62917	60S ribosomal protein L8 OS=Homo sapiens GN=RPL8 PE=1 SV=2	54.4747	12	33	12	1	257	28.007	11.03	1065.8	12
Q7Z2T5	TRMT1-like protein OS=Homo sapiens GN=TRMT1L PE=1 SV=2	36.0164	23	29	23	1	733	81.695	7.88	1023.77	23
Q9Y6Q3	Zinc finger protein 37 homolog OS=Homo sapiens GN=ZFP37 PE=2 SV=3	40.6349	22	34	22	1	630	71.164	9.09	1006.42	22
Q12986	Transcriptional repressor NF-X1 OS=Homo sapiens GN=NFX1 PE=1 SV=2	27.6786	21	26	21	1	1120	124.312	8.24	977.472	21
O60563	Cyclin-T1 OS=Homo sapiens GN=CCNT1 PE=1 SV=1	31.9559	17	27	15	1	726	80.634	8.78	976.79	17
Q9UEG4	Zinc finger protein 629 OS=Homo sapiens GN=ZNF629 PE=1 SV=2	37.8596	21	30	21	1	869	96.559	7.93	967.108	21
Q13523	Serine/threonine-protein kinase PRP4 homolog OS=Homo sapiens GN=PRPF4B PE=1 SV=3	18.4707	16	24	16	1	1007	116.916	10.26	898.138	16
P39023	60S ribosomal protein L3 OS=Homo sapiens GN=RPL3 PE=1 SV=2	44.1687	19	27	19	1	403	46.08	10.18	885.059	19
Q4VCS5	Angiomotin OS=Homo sapiens GN=AMOT PE=1 SV=1	25.8303	20	22	20	1	1084	118.013	7.64	874.731	20
Q9BZE4	Nucleolar GTP-binding protein 1 OS=Homo sapiens GN=GTPBP4 PE=1 SV=3	41.6404	23	27	23	1	634	73.918	9.5	874.474	23
Q14151	Scaffold attachment factor B2 OS=Homo sapiens GN=SAFB2 PE=1 SV=1	21.0913	16	22	10	1	953	107.408	6.16	774	16
O75400	Pre-mRNA-processing factor 40 homolog A OS=Homo sapiens GN=PRPF40A PE=1 SV=2	16.5099	15	17	15	1	957	108.737	7.56	733.621	15
Q96QC0	Serine/threonine-protein phosphatase 1 regulatory subunit 10 OS=Homo sapiens GN=PPP1R10 PE=1 SV=1	25.9574	18	20	18	1	940	98.996	9.17	730.864	18
P23246	Splicing factor, proline- and glutamine-rich OS=Homo sapiens GN=SFPQ PE=1 SV=2	26.4498	16	23	15	1	707	76.102	9.44	721.013	16
P02533	Keratin, type I cytoskeletal 14 OS=Homo sapiens GN=KRT14 PE=1 SV=4	35.1695	14	16	7	1	472	51.529	5.16	676.99	14
P13647	Keratin, type II cytoskeletal 5 OS=Homo sapiens GN=KRT5 PE=1 SV=3	26.1017	18	24	10	1	590	62.34	7.74	623.267	18
P08779	Keratin, type I cytoskeletal 16 OS=Homo sapiens GN=KRT16 PE=1 SV=4	27.4841	13	15	6	1	473	51.236	5.05	613.66	13
Q99575	Ribonucleases P/MRP protein subunit POP1 OS=Homo sapiens GN=POP1 PE=1 SV=2	18.6523	14	17	14	1	1024	114.636	9.22	613.025	14
P49711	Transcriptional repressor CTCF OS=Homo sapiens GN=CTCF PE=1 SV=1	25.0344	12	18	12	1	727	82.732	6.96	578.021	12
Q9BU76	Multiple myeloma tumor-associated protein 2 OS=Homo sapiens GN=MMTAG2 PE=1 SV=1	39.5437	10	16	10	1	263	29.394	10.02	566.58	10
Q96K58	Zinc finger protein 668 OS=Homo sapiens GN=ZNF668 PE=1 SV=3	37.9645	17	21	17	1	619	67.846	8.9	564.154	17
Q9H5H4	Zinc finger protein 768 OS=Homo sapiens GN=ZNF768 PE=1 SV=2	33.5185	15	18	15	1	540	60.191	7.97	552.815	15
Q9HCN8	Stromal cell-derived factor 2-like protein 1 OS=Homo sapiens GN=SDF2L1 PE=1 SV=2	43.8914	5	11	5	1	221	23.584	7.03	547.132	5
Q15428	Splicing factor 3A subunit 2 OS=Homo sapiens GN=SF3A2 PE=1 SV=2	20.6897	7	15	7	1	464	49.224	9.64	507.707	7
P56270	Myc-associated zinc finger protein OS=Homo sapiens GN=MAZ PE=1 SV=1	16.9811	7	16	7	1	477	48.576	8.95	503.797	7
Q15427	Splicing factor 3B subunit 4 OS=Homo sapiens GN=SF3B4 PE=1 SV=1	21.4623	6	12	6	1	424	44.357	8.56	486.373	6
P61313	60S ribosomal protein L15 OS=Homo sapiens GN=RPL15 PE=1 SV=2	42.1569	9	16	9	1	204	24.131	11.62	486.207	9
P58317	Zinc finger protein 121 OS=Homo sapiens GN=ZNF121 PE=3 SV=2	32.8205	10	16	7	1	390	44.665	8.05	469.616	10
P17020	Zinc finger protein 16 OS=Homo sapiens GN=ZNF16 PE=1 SV=3	26.8328	11	16	11	1	682	76.422	7.97	465.089	11
Q5VV52	Zinc finger protein 691 OS=Homo sapiens GN=ZNF691 PE=1 SV=1	32.0513	8	10	8	1	312	35.658	7.9	462.7	8
Q7L3S4	Zinc finger protein 771 OS=Homo sapiens GN=ZNF771 PE=1 SV=1	47.6341	11	20	11	1	317	35.679	8.79	453.707	11
P48668	Keratin, type II cytoskeletal 6C OS=Homo sapiens GN=KRT6C PE=1 SV=3	19.3262	12	17	3	1	564	59.988	8	432.564	12
P02538	Keratin, type II cytoskeletal 6A OS=Homo sapiens GN=KRT6A PE=1 SV=3	19.3262	12	17	3	1	564	60.008	8	432.564	12
P04259	Keratin, type II cytoskeletal 6B OS=Homo sapiens GN=KRT6B PE=1 SV=5	16.4894	11	16	3	0	564	60.03	8	429.617	11
P13646	Keratin, type I cytoskeletal 13 OS=Homo sapiens GN=KRT13 PE=1 SV=4	9.17031	6	11	2	0	458	49.557	4.96	408.657	6
O94842	TOX high mobility group box family member 4 OS=Homo sapiens GN=TOX4 PE=1 SV=1	20.934	8	8	8	1	621	66.153	5.06	388.61	8
O00257	E3 SUMO-protein ligase CBX4 OS=Homo sapiens GN=CBX4 PE=1 SV=3	21.6071	8	11	8	1	560	61.329	9.36	386.556	8
O60583	Cyclin-T2 OS=Homo sapiens GN=CCNT2 PE=1 SV=2	15.3425	8	9	6	1	730	80.979	8.92	384.769	8
Q9NWT1	p21-activated protein kinase-interacting protein 1 OS=Homo sapiens GN=PAK1IP1 PE=1 SV=2	38.2653	11	12	11	1	392	43.936	8.91	384.267	11
O43143	Pre-mRNA-splicing factor ATP-dependent RNA helicase DHX15 OS=Homo sapiens GN=DHX15 PE=1 SV=2	20.1258	13	13	13	1	795	90.875	7.46	378.497	13
Q15424	Scaffold attachment factor B1 OS=Homo sapiens GN=SAFB PE=1 SV=4	11.694	7	9	1	1	915	102.58	5.47	377.935	7
Q86YZ3	Hornerin OS=Homo sapiens GN=HRNR PE=1 SV=2	13.0526	5	10	5	1	2850	282.228	10.04	372.06	5
Q96MX3	Zinc finger protein 48 OS=Homo sapiens GN=ZNF48 PE=1 SV=2	26.699	10	13	10	1	618	67.777	9.36	368.227	10
Q5VWQ0	Round spermatid basic protein 1 OS=Homo sapiens GN=RSBN1 PE=1 SV=2	19.7007	10	10	10	1	802	90.015	8.6	366.74	10
Q8NB50	Zinc finger protein 62 homolog OS=Homo sapiens GN=ZFP62 PE=1 SV=3	24.1111	13	14	12	1	900	102.445	9.04	364.101	13
P15622	Zinc finger protein 250 OS=Homo sapiens GN=ZNF250 PE=1 SV=3	21.9643	9	14	8	1	560	63.427	8.28	358.339	9
O95625	Zinc finger and BTB domain-containing protein 11 OS=Homo sapiens GN=ZBTB11 PE=1 SV=2	10.7312	8	8	8	1	1053	119.308	8.66	355.378	8
Q02543	60S ribosomal protein L18a OS=Homo sapiens GN=RPL18A PE=1 SV=2	39.7727	9	12	9	1	176	20.749	10.71	354.973	9
Q9P2N5	RNA-binding protein 27 OS=Homo sapiens GN=RBM27 PE=1 SV=2	15.566	13	16	13	1	1060	118.645	9.19	346.793	13
O43660	Pleiotropic regulator 1 OS=Homo sapiens GN=PLRG1 PE=1 SV=1	24.5136	7	9	7	1	514	57.158	9.17	329.579	7
Q7Z2E3	Aprataxin OS=Homo sapiens GN=APTX PE=1 SV=2	33.7079	10	11	10	1	356	40.714	9.17	322.778	10
Q6ZN55	Zinc finger protein 574 OS=Homo sapiens GN=ZNF574 PE=1 SV=2	10.1562	6	10	6	1	896	98.837	8.07	319.19	6
Q8NCA5	Protein FAM98A OS=Homo sapiens GN=FAM98A PE=1 SV=1	18.4971	4	4	4	1	519	55.366	9.03	306.364	4
P26373	60S ribosomal protein L13 OS=Homo sapiens GN=RPL13 PE=1 SV=4	25.1185	6	9	6	1	211	24.247	11.65	301.922	6
P32121	Beta-arrestin-2 OS=Homo sapiens GN=ARRB2 PE=1 SV=2	15.6479	6	8	5	1	409	46.077	7.69	296.766	6
P52597	Heterogeneous nuclear ribonucleoprotein F OS=Homo sapiens GN=HNRNPF PE=1 SV=3	16.3855	5	6	3	1	415	45.643	5.58	295.348	5
Q15637	Splicing factor 1 OS=Homo sapiens GN=SF1 PE=1 SV=4	12.989	5	7	5	1	639	68.286	8.98	292.27	5
Q8NDT2	Putative RNA-binding protein 15B OS=Homo sapiens GN=RBM15B PE=1 SV=3	10.2247	9	10	9	1	890	97.147	9.85	286.897	9
Q9UHD1	Cysteine and histidine-rich domain-containing protein 1 OS=Homo sapiens GN=CHORDC1 PE=1 SV=2	23.7952	5	7	5	1	332	37.466	7.87	286.539	5
Q8NFD5	AT-rich interactive domain-containing protein 1B OS=Homo sapiens GN=ARID1B PE=1 SV=2	5.23256	6	6	6	1	2236	235.974	6.73	274.287	6
Q14241	Transcription elongation factor B polypeptide 3 OS=Homo sapiens GN=TCEB3 PE=1 SV=2	10.7769	7	9	7	1	798	89.853	9.57	272.92	7
Q99676	Zinc finger protein 184 OS=Homo sapiens GN=ZNF184 PE=1 SV=4	18.2423	9	11	9	1	751	86.119	8.07	272.908	9
Q15072	Zinc finger protein OZF OS=Homo sapiens GN=ZNF146 PE=1 SV=2	31.8493	7	10	7	1	292	33.286	8.88	272.175	7
Q5T6F2	Ubiquitin-associated protein 2 OS=Homo sapiens GN=UBAP2 PE=1 SV=1	8.57909	7	7	7	1	1119	117.044	7.34	270.534	7
P68363	Tubulin alpha-1B chain OS=Homo sapiens GN=TUBA1B PE=1 SV=1	27.051	8	8	8	1	451	50.12	5.06	265.91	8
Q8NAV1	Pre-mRNA-splicing factor 38A OS=Homo sapiens GN=PRPF38A PE=1 SV=1	31.0897	8	10	8	1	312	37.453	9.96	260.11	8
Q9H9J4	Ubiquitin carboxyl-terminal hydrolase 42 OS=Homo sapiens GN=USP42 PE=1 SV=3	6.571	6	6	6	1	1324	145.302	8.63	258.413	6
Q9H0G5	Nuclear speckle splicing regulatory protein 1 OS=Homo sapiens GN=NSRP1 PE=1 SV=1	14.8746	6	9	6	1	558	66.35	8.84	255.708	6
Q9Y6M1	Insulin-like growth factor 2 mRNA-binding protein 2 OS=Homo sapiens GN=IGF2BP2 PE=1 SV=2	13.3556	6	6	6	1	599	66.081	8.46	253.217	6
Q8TF47	Zinc finger protein 90 homolog OS=Homo sapiens GN=ZFP90 PE=1 SV=2	20.5975	7	8	7	1	636	72.985	8.06	252.15	7
Q7Z6E9	E3 ubiquitin-protein ligase RBBP6 OS=Homo sapiens GN=RBBP6 PE=1 SV=1	4.6875	6	6	6	1	1792	201.442	9.64	252.143	6
Q9BQE3	Tubulin alpha-1C chain OS=Homo sapiens GN=TUBA1C PE=1 SV=1	24.2762	7	7	7	1	449	49.863	5.1	240.596	7
Q71U36	Tubulin alpha-1A chain OS=Homo sapiens GN=TUBA1A PE=1 SV=1	24.1685	7	7	7	1	451	50.104	5.06	240.596	7
Q7Z3Y7	Keratin, type I cytoskeletal 28 OS=Homo sapiens GN=KRT28 PE=1 SV=2	5.60345	4	6	2	1	464	50.536	5.47	228.65	4
Q12788	Transducin beta-like protein 3 OS=Homo sapiens GN=TBL3 PE=1 SV=2	13.6139	8	8	8	1	808	88.978	6.9	215.79	8
P31943	Heterogeneous nuclear ribonucleoprotein H OS=Homo sapiens GN=HNRNPH1 PE=1 SV=4	13.363	4	5	2	1	449	49.198	6.3	206.73	4
Q06830	Peroxiredoxin-1 OS=Homo sapiens GN=PRDX1 PE=1 SV=1	43.7186	8	8	8	1	199	22.096	8.13	206.519	8
O95678	Keratin, type II cytoskeletal 75 OS=Homo sapiens GN=KRT75 PE=1 SV=2	7.98548	5	6	1	1	551	59.524	7.74	204.176	5
Q13595	Transformer-2 protein homolog alpha OS=Homo sapiens GN=TRA2A PE=1 SV=1	23.0496	5	5	5	1	282	32.669	11.27	199.33	5
P26599	Polypyrimidine tract-binding protein 1 OS=Homo sapiens GN=PTBP1 PE=1 SV=1	8.28625	3	4	3	1	531	57.186	9.17	197.14	3
Q2M2I5	Keratin, type I cytoskeletal 24 OS=Homo sapiens GN=KRT24 PE=1 SV=1	3.42857	2	4	1	1	525	55.053	4.96	193.702	2
Q01546	Keratin, type II cytoskeletal 2 oral OS=Homo sapiens GN=KRT76 PE=1 SV=2	5.64263	6	7	2	1	638	65.8	8.12	192.976	6
Q9Y2X9	Zinc finger protein 281 OS=Homo sapiens GN=ZNF281 PE=1 SV=1	9.49721	5	6	5	1	895	96.855	8.48	190.23	5
P46783	40S ribosomal protein S10 OS=Homo sapiens GN=RPS10 PE=1 SV=1	23.6364	3	4	3	1	165	18.886	10.15	189.058	3
P27635	60S ribosomal protein L10 OS=Homo sapiens GN=RPL10 PE=1 SV=4	12.1495	3	4	3	1	214	24.588	10.08	188.92	3
Q9Y580	RNA-binding protein 7 OS=Homo sapiens GN=RBM7 PE=1 SV=1	25.188	5	5	5	1	266	30.485	9.57	186.02	5
Q9H116	GDNF-inducible zinc finger protein 1 OS=Homo sapiens GN=GZF1 PE=1 SV=1	11.2518	7	8	7	1	711	80.441	7.87	185.793	7
P46778	60S ribosomal protein L21 OS=Homo sapiens GN=RPL21 PE=1 SV=2	32.5	6	8	6	1	160	18.553	10.49	182.112	6
P05787	Keratin, type II cytoskeletal 8 OS=Homo sapiens GN=KRT8 PE=1 SV=7	6.21118	5	7	1	0	483	53.671	5.59	181.63	5
P62987	Ubiquitin-60S ribosomal protein L40 OS=Homo sapiens GN=UBA52 PE=1 SV=2	24.2188	4	6	4	1	128	14.719	9.83	180.63	4
P62979	Ubiquitin-40S ribosomal protein S27a OS=Homo sapiens GN=RPS27A PE=1 SV=2	19.8718	4	6	4	1	156	17.953	9.64	180.63	4
P0CG47	Polyubiquitin-B OS=Homo sapiens GN=UBB PE=1 SV=1	40.6114	4	6	4	1	229	25.746	7.43	180.63	4
P0CG48	Polyubiquitin-C OS=Homo sapiens GN=UBC PE=1 SV=3	40.7299	4	6	4	1	685	76.992	7.66	180.63	4
P68104	Elongation factor 1-alpha 1 OS=Homo sapiens GN=EEF1A1 PE=1 SV=1	8.44156	4	5	4	1	462	50.109	9.01	178.31	4
Q5VTE0	Putative elongation factor 1-alpha-like 3 OS=Homo sapiens GN=EEF1A1P5 PE=5 SV=1	8.44156	4	5	4	1	462	50.153	9.07	178.31	4
P19012	Keratin, type I cytoskeletal 15 OS=Homo sapiens GN=KRT15 PE=1 SV=3	8.55263	5	5	0	2	456	49.181	4.77	175.06	5
O43290	U4/U6.U5 tri-snRNP-associated protein 1 OS=Homo sapiens GN=SART1 PE=1 SV=1	5	3	3	3	1	800	90.2	6.13	174.847	3
Q15397	Pumilio homolog 3 OS=Homo sapiens GN=PUM3 PE=1 SV=3	10.4938	6	6	6	1	648	73.538	9.64	174.45	6
Q9HBT8	Zinc finger protein 286A OS=Homo sapiens GN=ZNF286A PE=1 SV=1	9.78887	4	7	1	1	521	60.136	8.32	173.65	4
Q8N684	Cleavage and polyadenylation specificity factor subunit 7 OS=Homo sapiens GN=CPSF7 PE=1 SV=1	14.2251	5	6	5	1	471	52.018	8	168.497	5
Q13748	Tubulin alpha-3C/D chain OS=Homo sapiens GN=TUBA3C PE=1 SV=3	20.8889	6	6	6	1	450	49.928	5.1	168.444	6
P12035	Keratin, type II cytoskeletal 3 OS=Homo sapiens GN=KRT3 PE=1 SV=3	4.29936	5	6	2	1	628	64.378	6.48	166.577	5
O43309	Zinc finger and SCAN domain-containing protein 12 OS=Homo sapiens GN=ZSCAN12 PE=1 SV=1	10.2649	5	6	4	1	604	70.178	6.74	165.436	5
Q75N03	E3 ubiquitin-protein ligase Hakai OS=Homo sapiens GN=CBLL1 PE=1 SV=1	16.7006	5	7	5	1	491	54.484	8.29	164.56	5
P22087	rRNA 2'-O-methyltransferase fibrillarin OS=Homo sapiens GN=FBL PE=1 SV=2	28.0374	6	7	6	1	321	33.763	10.18	164.162	6
Q8TAQ2	SWI/SNF complex subunit SMARCC2 OS=Homo sapiens GN=SMARCC2 PE=1 SV=1	4.03624	4	4	4	1	1214	132.797	5.69	163.147	4
Q96IR2	Zinc finger protein 845 OS=Homo sapiens GN=ZNF845 PE=2 SV=3	4.63918	4	7	1	0	970	113.06	9.33	156.489	4
P62750	60S ribosomal protein L23a OS=Homo sapiens GN=RPL23A PE=1 SV=1	33.9744	6	6	6	1	156	17.684	10.45	154.778	6
Q9Y383	Putative RNA-binding protein Luc7-like 2 OS=Homo sapiens GN=LUC7L2 PE=1 SV=2	10.7143	4	4	4	1	392	46.486	10.01	154.45	4
Q14157	Ubiquitin-associated protein 2-like OS=Homo sapiens GN=UBAP2L PE=1 SV=2	6.43974	4	4	4	1	1087	114.465	7.11	152.96	4
Q8NC51	Plasminogen activator inhibitor 1 RNA-binding protein OS=Homo sapiens GN=SERBP1 PE=1 SV=2	15.6863	5	6	5	1	408	44.938	8.65	151.633	5
Q9NW07	Zinc finger protein 358 OS=Homo sapiens GN=ZNF358 PE=1 SV=2	15.493	6	7	6	1	568	59.25	6.6	150.143	6
Q07020	60S ribosomal protein L18 OS=Homo sapiens GN=RPL18 PE=1 SV=2	25.5319	4	4	4	1	188	21.621	11.72	149.706	4
Q9NSD4	Zinc finger protein 275 OS=Homo sapiens GN=ZNF275 PE=1 SV=2	11.8881	4	4	4	1	429	48.412	9.09	148.865	4
Q16670	Zinc finger and SCAN domain-containing protein 26 OS=Homo sapiens GN=ZSCAN26 PE=1 SV=2	11.0879	4	5	4	1	478	55.219	8.06	147.88	4
Q02878	60S ribosomal protein L6 OS=Homo sapiens GN=RPL6 PE=1 SV=3	13.8889	3	3	3	1	288	32.708	10.58	144.397	3
P42694	Probable helicase with zinc finger domain OS=Homo sapiens GN=HELZ PE=1 SV=2	2.88363	3	3	3	1	1942	218.833	7.42	141.333	3
Q969P6	DNA topoisomerase I, mitochondrial OS=Homo sapiens GN=TOP1MT PE=1 SV=1	4.15973	3	6	3	1	601	69.828	9.41	139.55	3
Q04695	Keratin, type I cytoskeletal 17 OS=Homo sapiens GN=KRT17 PE=1 SV=2	8.7963	5	5	1	1	432	48.076	5.02	138.21	5
Q71UI9	Histone H2A.V OS=Homo sapiens GN=H2AFV PE=1 SV=3	25.7812	3	4	3	1	128	13.501	10.58	138.05	3
P0C0S5	Histone H2A.Z OS=Homo sapiens GN=H2AFZ PE=1 SV=2	25.7812	3	4	3	1	128	13.545	10.58	138.05	3
P42771	Cyclin-dependent kinase inhibitor 2A OS=Homo sapiens GN=CDKN2A PE=1 SV=2	26.2821	3	4	3	1	156	16.522	5.81	136.88	3
P0DMV9	Heat shock 70 kDa protein 1B OS=Homo sapiens GN=HSPA1B PE=1 SV=1	6.24025	3	3	1	1	641	70.009	5.66	136.173	3
P17066	Heat shock 70 kDa protein 6 OS=Homo sapiens GN=HSPA6 PE=1 SV=2	6.22084	3	3	1	1	643	70.984	6.14	136.173	3
P07437	Tubulin beta chain OS=Homo sapiens GN=TUBB PE=1 SV=2	11.036	4	4	4	1	444	49.639	4.89	134.47	4
Q8TAD8	Smad nuclear-interacting protein 1 OS=Homo sapiens GN=SNIP1 PE=1 SV=1	18.4343	5	5	5	1	396	45.75	9.99	134.45	5
Q9NQ39	Putative 40S ribosomal protein S10-like OS=Homo sapiens GN=RPS10P5 PE=5 SV=1	8.52273	1	2	1	1	176	20.108	10.13	133.22	1
Q92576	PHD finger protein 3 OS=Homo sapiens GN=PHF3 PE=1 SV=3	2.89358	4	4	4	1	2039	229.339	6.96	131.79	4
Q9Y388	RNA-binding motif protein, X-linked 2 OS=Homo sapiens GN=RBMX2 PE=1 SV=2	13.0435	4	4	4	1	322	37.313	9.83	130	4
Q99470	Stromal cell-derived factor 2 OS=Homo sapiens GN=SDF2 PE=1 SV=2	28.91	3	3	3	1	211	23.011	7.33	129.447	3
Q7Z3Z0	Keratin, type I cytoskeletal 25 OS=Homo sapiens GN=KRT25 PE=1 SV=1	4	2	3	1	1	450	49.287	5.08	128.827	2
Q7Z3Y8	Keratin, type I cytoskeletal 27 OS=Homo sapiens GN=KRT27 PE=1 SV=2	3.92157	2	3	1	1	459	49.792	5.05	128.827	2
Q14CN4	Keratin, type II cytoskeletal 72 OS=Homo sapiens GN=KRT72 PE=1 SV=2	4.69667	3	4	1	1	511	55.842	6.89	127.637	3
Q96JF6	Zinc finger protein 594 OS=Homo sapiens GN=ZNF594 PE=2 SV=3	8.92193	5	7	4	1	807	93.847	8.7	127.359	5
Q13627	Dual specificity tyrosine-phosphorylation-regulated kinase 1A OS=Homo sapiens GN=DYRK1A PE=1 SV=2	9.69856	5	5	5	1	763	85.53	8.75	127.11	5
Q5XKE5	Keratin, type II cytoskeletal 79 OS=Homo sapiens GN=KRT79 PE=1 SV=2	5.60748	4	4	1	1	535	57.8	7.2	126.37	4
Q6ZNA1	Zinc finger protein 836 OS=Homo sapiens GN=ZNF836 PE=2 SV=2	2.88462	2	5	1	1	936	107.647	9.22	126.086	2
Q9NYV4	Cyclin-dependent kinase 12 OS=Homo sapiens GN=CDK12 PE=1 SV=2	1.47651	1	1	1	1	1490	164.054	9.44	125.16	1
P57071	PR domain zinc finger protein 15 OS=Homo sapiens GN=PRDM15 PE=1 SV=4	6.10484	6	6	6	1	1507	169.161	8.24	124.69	6
O14497	AT-rich interactive domain-containing protein 1A OS=Homo sapiens GN=ARID1A PE=1 SV=3	0.83151	1	1	1	1	2285	241.892	6.7	122.31	1
Q5HYJ3	Protein FAM76B OS=Homo sapiens GN=FAM76B PE=1 SV=3	20.059	4	4	4	1	339	38.683	9.25	121.68	4
P31948	Stress-induced-phosphoprotein 1 OS=Homo sapiens GN=STIP1 PE=1 SV=1	9.02394	4	4	4	1	543	62.599	6.8	121.48	4
P55795	Heterogeneous nuclear ribonucleoprotein H2 OS=Homo sapiens GN=HNRNPH2 PE=1 SV=1	9.57684	3	3	2	1	449	49.232	6.3	117.267	3
Q5D862	Filaggrin-2 OS=Homo sapiens GN=FLG2 PE=1 SV=1	2.88582	2	2	2	1	2391	247.928	8.31	116.484	2
Q92901	60S ribosomal protein L3-like OS=Homo sapiens GN=RPL3L PE=2 SV=3	2.9484	2	3	2	1	407	46.267	10.45	116.197	2
Q6ZMS4	Zinc finger protein 852 OS=Homo sapiens GN=ZNF852 PE=1 SV=4	10.3131	3	5	2	1	543	62.044	8.12	115.866	3
P68366	Tubulin alpha-4A chain OS=Homo sapiens GN=TUBA4A PE=1 SV=1	17.1875	5	5	5	1	448	49.892	5.06	114.735	5
O75820	Zinc finger protein 189 OS=Homo sapiens GN=ZNF189 PE=1 SV=2	8.30671	4	4	4	1	626	72.929	8.5	114.57	4
Q86UY6	N-alpha-acetyltransferase 40 OS=Homo sapiens GN=NAA40 PE=1 SV=1	12.2363	2	2	2	1	237	27.176	7.39	113.87	2
P09651	Heterogeneous nuclear ribonucleoprotein A1 OS=Homo sapiens GN=HNRNPA1 PE=1 SV=5	11.5591	3	3	3	1	372	38.723	9.13	113.684	3
Q6PEY2	Tubulin alpha-3E chain OS=Homo sapiens GN=TUBA3E PE=1 SV=2	16.4444	5	5	5	1	450	49.827	5.14	112.155	5
Q7Z794	Keratin, type II cytoskeletal 1b OS=Homo sapiens GN=KRT77 PE=2 SV=3	4.67128	4	4	0	0	578	61.864	5.99	111.666	4
Q9ULD5	Zinc finger protein 777 OS=Homo sapiens GN=ZNF777 PE=1 SV=2	6.05263	4	4	4	1	760	85.123	5.92	110.96	4
Q9P0L1	Zinc finger protein with KRAB and SCAN domains 7 OS=Homo sapiens GN=ZKSCAN7 PE=1 SV=2	5.96817	2	5	0	1	754	84.979	7.47	110.819	2
Q9UC06	Zinc finger protein 70 OS=Homo sapiens GN=ZNF70 PE=2 SV=2	17.4888	5	8	5	1	446	50.769	8.31	110.745	5
O60506	Heterogeneous nuclear ribonucleoprotein Q OS=Homo sapiens GN=SYNCRIP PE=1 SV=2	4.01284	2	2	2	1	623	69.56	8.59	109.13	2
Q8N3J9	Zinc finger protein 664 OS=Homo sapiens GN=ZNF664 PE=2 SV=1	14.9425	2	3	2	1	261	30.263	8.69	108.118	2
P19013	Keratin, type II cytoskeletal 4 OS=Homo sapiens GN=KRT4 PE=1 SV=4	5.05618	3	3	1	0	534	57.25	6.61	108.107	3
Q7Z3Y9	Keratin, type I cytoskeletal 26 OS=Homo sapiens GN=KRT26 PE=1 SV=2	1.92308	1	2	0	3	468	51.878	4.92	107.6	1
P62241	40S ribosomal protein S8 OS=Homo sapiens GN=RPS8 PE=1 SV=2	16.8269	3	3	3	1	208	24.19	10.32	106.987	3
Q9UKV8	Protein argonaute-2 OS=Homo sapiens GN=AGO2 PE=1 SV=3	6.98487	4	4	4	1	859	97.146	9.19	106.65	4
P13639	Elongation factor 2 OS=Homo sapiens GN=EEF2 PE=1 SV=4	4.31235	3	3	3	1	858	95.277	6.83	106.193	3
O75832	26S proteasome non-ATPase regulatory subunit 10 OS=Homo sapiens GN=PSMD10 PE=1 SV=1	24.7788	3	3	3	1	226	24.412	6.1	106.05	3
Q9NQZ8	Endothelial zinc finger protein induced by tumor necrosis factor alpha OS=Homo sapiens GN=ZNF71 PE=2 SV=1	10.4294	3	3	3	1	489	54.462	8.68	105.897	3
Q9Y5A6	Zinc finger and SCAN domain-containing protein 21 OS=Homo sapiens GN=ZSCAN21 PE=1 SV=2	5.70825	2	5	1	1	473	53.624	7.72	105.843	2
Q15776	Zinc finger protein with KRAB and SCAN domains 8 OS=Homo sapiens GN=ZKSCAN8 PE=1 SV=2	9.86159	4	7	2	1	578	65.775	7.39	104.376	4
P17021	Zinc finger protein 17 OS=Homo sapiens GN=ZNF17 PE=2 SV=3	6.79758	2	5	1	0	662	77.154	8.44	103.477	2
Q4V348	Zinc finger protein 658B OS=Homo sapiens GN=ZNF658B PE=2 SV=1	9.15751	3	5	0	0	819	94.27	8.56	103.077	3
Q5TYW1	Zinc finger protein 658 OS=Homo sapiens GN=ZNF658 PE=2 SV=2	8.49858	4	7	0	0	1059	122.196	8.28	103.077	4
P27348	14-3-3 protein theta OS=Homo sapiens GN=YWHAQ PE=1 SV=1	9.79592	2	2	2	1	245	27.747	4.78	102.94	2
P04080	Cystatin-B OS=Homo sapiens GN=CSTB PE=1 SV=2	24.4898	2	2	2	1	98	11.133	7.56	101.36	2
P63244	Receptor of activated protein C kinase 1 OS=Homo sapiens GN=RACK1 PE=1 SV=3	22.3975	5	5	5	1	317	35.055	7.69	100.18	5
Q9Y2D9	Zinc finger protein 652 OS=Homo sapiens GN=ZNF652 PE=1 SV=3	6.60066	3	3	3	1	606	69.699	8.65	99.9433	3
Q8NB42	Zinc finger protein 527 OS=Homo sapiens GN=ZNF527 PE=2 SV=2	5.58292	3	5	0	0	609	70.856	8.03	97.3496	3
Q9Y3U8	60S ribosomal protein L36 OS=Homo sapiens GN=RPL36 PE=1 SV=3	21.9048	3	3	3	1	105	12.246	11.59	97.2167	3
A2RRD8	Zinc finger protein 320 OS=Homo sapiens GN=ZNF320 PE=1 SV=1	7.85855	4	4	1	1	509	59.288	8.91	95.7344	4
P84098	60S ribosomal protein L19 OS=Homo sapiens GN=RPL19 PE=1 SV=1	13.2653	2	2	2	1	196	23.451	11.47	95.29	2
Q96GE5	Zinc finger protein 799 OS=Homo sapiens GN=ZNF799 PE=2 SV=4	2.17729	1	1	1	1	643	74.24	9.09	95.23	1
Q9Y2A4	Zinc finger protein 443 OS=Homo sapiens GN=ZNF443 PE=2 SV=2	2.08644	1	1	1	1	671	77.465	9.1	95.23	1
P0CG31	Putative zinc finger protein 286B OS=Homo sapiens GN=ZNF286B PE=5 SV=1	5.36398	2	3	1	1	522	59.534	8.35	94.2693	2
Q13885	Tubulin beta-2A chain OS=Homo sapiens GN=TUBB2A PE=1 SV=1	8.31461	3	3	3	1	445	49.875	4.89	93.6533	3
Q9BVA1	Tubulin beta-2B chain OS=Homo sapiens GN=TUBB2B PE=1 SV=1	8.31461	3	3	3	1	445	49.921	4.89	93.6533	3
P30050	60S ribosomal protein L12 OS=Homo sapiens GN=RPL12 PE=1 SV=1	19.3939	2	2	2	1	165	17.808	9.42	92.7091	2
Q96SE7	Zinc finger protein 347 OS=Homo sapiens GN=ZNF347 PE=1 SV=2	2.74136	2	4	0	0	839	95.709	9.17	92.6183	2
P62266	40S ribosomal protein S23 OS=Homo sapiens GN=RPS23 PE=1 SV=3	16.0839	2	2	2	1	143	15.798	10.49	92.5699	2
P0CG24	Zinc finger protein 883 OS=Homo sapiens GN=ZNF883 PE=2 SV=1	3.95778	1	3	0	4	379	43.938	8.69	92.2372	1
Q8NCK3	Zinc finger protein 485 OS=Homo sapiens GN=ZNF485 PE=2 SV=1	3.40136	1	4	0	2	441	50.248	9.6	92.2372	1
P17036	Zinc finger protein 3 OS=Homo sapiens GN=ZNF3 PE=1 SV=3	10.0897	1	3	0	4	446	50.884	7.52	92.2372	1
P17023	Zinc finger protein 19 OS=Homo sapiens GN=ZNF19 PE=2 SV=4	6.55022	1	3	0	4	458	52.415	7.8	92.2372	1
Q86W11	Zinc finger and SCAN domain-containing protein 30 OS=Homo sapiens GN=ZSCAN30 PE=1 SV=1	3.03644	1	3	0	4	494	56.328	6.7	92.2372	1
Q96NJ6	Zinc finger protein 3 homolog OS=Homo sapiens GN=ZFP3 PE=2 SV=1	2.98805	1	3	0	4	502	57.625	7.34	92.2372	1
Q8NF99	Zinc finger protein 397 OS=Homo sapiens GN=ZNF397 PE=1 SV=2	2.80899	1	3	0	4	534	61.1	7.27	92.2372	1
P17032	Zinc finger protein 37A OS=Homo sapiens GN=ZNF37A PE=2 SV=3	2.6738	1	3	0	4	561	65.376	8.19	92.2372	1
Q8N883	Zinc finger protein 614 OS=Homo sapiens GN=ZNF614 PE=1 SV=2	2.5641	1	3	0	4	585	67.171	9.04	92.2372	1
P17027	Zinc finger protein 23 OS=Homo sapiens GN=ZNF23 PE=2 SV=3	12.1306	2	4	0	1	643	73.012	8.12	92.2372	2
Q5MCW4	Zinc finger protein 569 OS=Homo sapiens GN=ZNF569 PE=1 SV=1	4.37318	1	3	0	4	686	79.531	8.66	92.2372	1
Q9UNY5	Zinc finger protein 232 OS=Homo sapiens GN=ZNF232 PE=1 SV=1	3.59712	1	3	1	1	417	47.658	6.74	92.0635	1
Q9BSG1	Zinc finger protein 2 OS=Homo sapiens GN=ZNF2 PE=1 SV=4	3.52113	1	4	1	1	426	48.832	8.57	92.0635	1
Q8N9F8	Zinc finger protein 454 OS=Homo sapiens GN=ZNF454 PE=2 SV=2	4.98084	2	5	1	0	522	59.969	8.65	92.0635	2
P42677	40S ribosomal protein S27 OS=Homo sapiens GN=RPS27 PE=1 SV=3	15.4762	1	1	1	1	84	9.455	9.45	91.62	1
Q71UM5	40S ribosomal protein S27-like OS=Homo sapiens GN=RPS27L PE=1 SV=3	15.4762	1	1	1	1	84	9.471	9.45	91.62	1
Q9NY65	Tubulin alpha-8 chain OS=Homo sapiens GN=TUBA8 PE=1 SV=1	14.2539	4	4	4	1	449	50.062	5.06	89.7225	4
Q9UJW8	Zinc finger protein 180 OS=Homo sapiens GN=ZNF180 PE=1 SV=2	4.33526	1	2	0	0	692	79.061	7.8	89.6272	1
Q9HCZ1	Zinc finger protein 334 OS=Homo sapiens GN=ZNF334 PE=2 SV=2	2.20588	1	2	0	0	680	79.597	9.16	89.6272	1
P08729	Keratin, type II cytoskeletal 7 OS=Homo sapiens GN=KRT7 PE=1 SV=5	4.26439	3	3	1	0	469	51.354	5.48	89.4133	3
P07237	Protein disulfide-isomerase OS=Homo sapiens GN=P4HB PE=1 SV=3	4.33071	2	2	2	1	508	57.081	4.87	87.98	2
P11142	Heat shock cognate 71 kDa protein OS=Homo sapiens GN=HSPA8 PE=1 SV=1	5.57276	3	3	1	1	646	70.854	5.52	87.6099	3
P62277	40S ribosomal protein S13 OS=Homo sapiens GN=RPS13 PE=1 SV=2	16.5563	2	2	2	1	151	17.212	10.54	87.38	2
O43670	BUB3-interacting and GLEBS motif-containing protein ZNF207 OS=Homo sapiens GN=ZNF207 PE=1 SV=1	5.43933	2	2	2	1	478	50.717	9.1	86.57	2
Q05639	Elongation factor 1-alpha 2 OS=Homo sapiens GN=EEF1A2 PE=1 SV=1	5.83153	3	3	3	1	463	50.438	9.03	85.3333	3
Q8N1N4	Keratin, type II cytoskeletal 78 OS=Homo sapiens GN=KRT78 PE=2 SV=2	2.30769	1	1	1	1	520	56.83	6.02	84.79	1
P17014	Zinc finger protein 12 OS=Homo sapiens GN=ZNF12 PE=1 SV=3	2.15208	1	3	1	1	697	81.149	7.84	84.3412	1
P52655	Transcription initiation factor IIA subunit 1 OS=Homo sapiens GN=GTF2A1 PE=1 SV=1	5.85106	2	2	2	1	376	41.488	4.55	84.22	2
Q92922	SWI/SNF complex subunit SMARCC1 OS=Homo sapiens GN=SMARCC1 PE=1 SV=3	1.90045	2	2	2	1	1105	122.79	5.76	83.3577	2
P68371	Tubulin beta-4B chain OS=Homo sapiens GN=TUBB4B PE=1 SV=1	4.94382	2	2	2	1	445	49.799	4.89	82.84	2
P35900	Keratin, type I cytoskeletal 20 OS=Homo sapiens GN=KRT20 PE=1 SV=1	2.59434	2	2	0	2	424	48.457	5.69	82.71	2
Q4G0J3	La-related protein 7 OS=Homo sapiens GN=LARP7 PE=1 SV=1	3.2646	2	2	2	1	582	66.857	9.55	82.14	2
P48741	Putative heat shock 70 kDa protein 7 OS=Homo sapiens GN=HSPA7 PE=5 SV=2	6.53951	2	2	0	2	367	40.22	7.87	82.0074	2
P54652	Heat shock-related 70 kDa protein 2 OS=Homo sapiens GN=HSPA2 PE=1 SV=1	3.75587	2	2	0	2	639	69.978	5.74	82.0074	2
P34931	Heat shock 70 kDa protein 1-like OS=Homo sapiens GN=HSPA1L PE=1 SV=2	3.74415	2	2	0	2	641	70.331	6.02	82.0074	2
Q9UN81	LINE-1 retrotransposable element ORF1 protein OS=Homo sapiens GN=L1RE1 PE=1 SV=1	3.84615	1	1	1	1	338	40.031	9.51	81.52	1
Q8WUA2	Peptidyl-prolyl cis-trans isomerase-like 4 OS=Homo sapiens GN=PPIL4 PE=1 SV=1	2.64228	1	1	1	1	492	57.189	5.92	81.46	1
Q02930	Cyclic AMP-responsive element-binding protein 5 OS=Homo sapiens GN=CREB5 PE=1 SV=3	4.72441	1	1	1	1	508	56.882	8.5	81.16	1
Q96NM4	TOX high mobility group box family member 2 OS=Homo sapiens GN=TOX2 PE=2 SV=2	2.86885	1	1	1	1	488	51.571	6.71	80.36	1
O15405	TOX high mobility group box family member 3 OS=Homo sapiens GN=TOX3 PE=1 SV=2	2.43056	1	1	1	1	576	63.302	7.85	80.36	1
P10075	Zinc finger protein GLI4 OS=Homo sapiens GN=GLI4 PE=1 SV=2	3.45745	1	2	1	1	376	41.119	8.81	79.2689	1
P08727	Keratin, type I cytoskeletal 19 OS=Homo sapiens GN=KRT19 PE=1 SV=4	6.25	3	3	0	2	400	44.079	5.14	77.93	3
P05387	60S acidic ribosomal protein P2 OS=Homo sapiens GN=RPLP2 PE=1 SV=1	42.6087	2	3	2	1	115	11.658	4.54	77.2967	2
Q6P1X5	Transcription initiation factor TFIID subunit 2 OS=Homo sapiens GN=TAF2 PE=1 SV=3	2.00167	2	2	2	1	1199	136.883	8.19	76.3	2
Q15937	Zinc finger protein 79 OS=Homo sapiens GN=ZNF79 PE=1 SV=2	7.22892	3	4	3	1	498	55.314	8.18	76.1346	3
O75123	Zinc finger protein 623 OS=Homo sapiens GN=ZNF623 PE=2 SV=2	6.90299	3	3	3	1	536	61.353	8.16	74.9113	3
P62244	40S ribosomal protein S15a OS=Homo sapiens GN=RPS15A PE=1 SV=2	17.6923	2	2	2	1	130	14.83	10.13	73.8635	2
Q86Y25	Zinc finger protein 354C OS=Homo sapiens GN=ZNF354C PE=2 SV=1	2.70758	1	1	1	1	554	64.805	8.05	73.8	1
P50914	60S ribosomal protein L14 OS=Homo sapiens GN=RPL14 PE=1 SV=4	5.5814	1	1	1	1	215	23.417	10.93	73.69	1
Q13360	Zinc finger protein 177 OS=Homo sapiens GN=ZNF177 PE=1 SV=4	3.1185	1	4	0	0	481	54.746	8.18	72.6091	1
Q5HYK9	Zinc finger protein 667 OS=Homo sapiens GN=ZNF667 PE=2 SV=2	2.45902	1	2	1	1	610	70.116	9.73	72.6091	1
P42772	Cyclin-dependent kinase 4 inhibitor B OS=Homo sapiens GN=CDKN2B PE=1 SV=1	8.69565	1	2	1	1	138	14.713	6.54	72.58	1
Q9GZN8	UPF0687 protein C20orf27 OS=Homo sapiens GN=C20orf27 PE=1 SV=3	18.9655	2	3	2	1	174	19.279	6.84	70.3133	2
Q8TF39	Zinc finger protein 483 OS=Homo sapiens GN=ZNF483 PE=1 SV=3	4.83871	3	3	3	1	744	85.044	8.57	69.892	3
Q6ZNH5	Zinc finger protein 497 OS=Homo sapiens GN=ZNF497 PE=2 SV=2	5.62249	2	2	2	1	498	54.686	8.94	69.7458	2
O43167	Zinc finger and BTB domain-containing protein 24 OS=Homo sapiens GN=ZBTB24 PE=1 SV=2	1.72166	1	1	1	1	697	78.233	7.61	69.46	1
Q01844	RNA-binding protein EWS OS=Homo sapiens GN=EWSR1 PE=1 SV=1	3.65854	1	1	1	1	656	68.436	9.33	67.67	1
P52746	Zinc finger protein 142 OS=Homo sapiens GN=ZNF142 PE=1 SV=4	1.83758	2	2	2	1	1687	187.758	7.91	67.59	2
P08048	Zinc finger Y-chromosomal protein OS=Homo sapiens GN=ZFY PE=1 SV=3	1.74782	1	1	1	1	801	90.447	6.06	67.18	1
P17010	Zinc finger X-chromosomal protein OS=Homo sapiens GN=ZFX PE=2 SV=2	1.73913	1	1	1	1	805	90.464	6.14	67.18	1
P35268	60S ribosomal protein L22 OS=Homo sapiens GN=RPL22 PE=1 SV=2	10.1562	1	1	1	1	128	14.778	9.19	66.91	1
Q9UN86	Ras GTPase-activating protein-binding protein 2 OS=Homo sapiens GN=G3BP2 PE=1 SV=2	2.6971	1	2	1	1	482	54.088	5.55	66.85	1
P17098	Zinc finger protein 8 OS=Homo sapiens GN=ZNF8 PE=1 SV=2	6.08696	3	3	3	1	575	64.93	7.39	66.7704	3
Q7Z2W4	Zinc finger CCCH-type antiviral protein 1 OS=Homo sapiens GN=ZC3HAV1 PE=1 SV=3	1.66297	1	1	1	1	902	101.367	8.4	65.73	1
O60231	Putative pre-mRNA-splicing factor ATP-dependent RNA helicase DHX16 OS=Homo sapiens GN=DHX16 PE=1 SV=2	0.864553	1	1	1	1	1041	119.189	6.8	65.72	1
Q14562	ATP-dependent RNA helicase DHX8 OS=Homo sapiens GN=DHX8 PE=1 SV=1	0.737705	1	1	1	1	1220	139.227	8.32	65.72	1
Q86X95	Corepressor interacting with RBPJ 1 OS=Homo sapiens GN=CIR1 PE=1 SV=1	3.77778	1	1	1	1	450	52.281	9.86	64.59	1
P10599	Thioredoxin OS=Homo sapiens GN=TXN PE=1 SV=3	12.381	1	1	1	1	105	11.73	4.92	64.47	1
P62854	40S ribosomal protein S26 OS=Homo sapiens GN=RPS26 PE=1 SV=3	13.0435	1	1	1	1	115	13.007	11	64.35	1
P17019	Zinc finger protein 708 OS=Homo sapiens GN=ZNF708 PE=1 SV=5	9.81964	2	2	1	1	499	57.32	9.39	63.9973	2
Q5JVF3	PCI domain-containing protein 2 OS=Homo sapiens GN=PCID2 PE=1 SV=2	3.00752	1	1	1	1	399	46	8.53	63.99	1
Q5HY98	Zinc finger protein 766 OS=Homo sapiens GN=ZNF766 PE=2 SV=1	4.2735	2	2	0	1	468	54.472	9.45	63.9756	2
P0CJ79	Zinc finger protein 888 OS=Homo sapiens GN=ZNF888 PE=3 SV=1	4	2	2	0	1	500	58.689	9.09	63.9756	2
Q5VIY5	Zinc finger protein 468 OS=Homo sapiens GN=ZNF468 PE=2 SV=1	3.83142	2	2	0	1	522	60.534	8.82	63.9756	2
Q9NV72	Zinc finger protein 701 OS=Homo sapiens GN=ZNF701 PE=2 SV=3	3.76648	2	2	0	1	531	60.864	9.28	63.9756	2
Q7L2R6	Zinc finger protein 765 OS=Homo sapiens GN=ZNF765 PE=1 SV=2	3.82409	2	2	0	1	523	61.594	8.6	63.9756	2
Q6ZN06	Zinc finger protein 813 OS=Homo sapiens GN=ZNF813 PE=2 SV=2	3.24149	2	2	0	1	617	71.674	9.36	63.9756	2
P17035	Zinc finger protein 28 OS=Homo sapiens GN=ZNF28 PE=2 SV=5	2.78552	2	2	0	1	718	83.604	9.03	63.9756	2
Q86XN6	Zinc finger protein 761 OS=Homo sapiens GN=ZNF761 PE=2 SV=2	2.68097	2	2	0	1	746	87.662	9	63.9756	2
Q08AN1	Zinc finger protein 616 OS=Homo sapiens GN=ZNF616 PE=2 SV=2	2.56082	2	2	0	1	781	90.215	9.57	63.9756	2
Q6UN15	Pre-mRNA 3'-end-processing factor FIP1 OS=Homo sapiens GN=FIP1L1 PE=1 SV=1	4.3771	2	2	2	1	594	66.487	5.59	63.7091	2
Q6EEV6	Small ubiquitin-related modifier 4 OS=Homo sapiens GN=SUMO4 PE=1 SV=2	12.6316	1	1	1	1	95	10.678	7.18	63.49	1
P61956	Small ubiquitin-related modifier 2 OS=Homo sapiens GN=SUMO2 PE=1 SV=3	12.6316	1	1	1	1	95	10.864	5.5	63.49	1
P55854	Small ubiquitin-related modifier 3 OS=Homo sapiens GN=SUMO3 PE=1 SV=2	11.6505	1	1	1	1	103	11.63	5.49	63.49	1
P62913	60S ribosomal protein L11 OS=Homo sapiens GN=RPL11 PE=1 SV=2	6.74157	1	1	1	1	178	20.24	9.6	63.41	1
Q9Y463	Dual specificity tyrosine-phosphorylation-regulated kinase 1B OS=Homo sapiens GN=DYRK1B PE=1 SV=1	2.06677	1	1	1	1	629	69.154	9.13	63.3	1
Q9NQ29	Putative RNA-binding protein Luc7-like 1 OS=Homo sapiens GN=LUC7L PE=1 SV=1	5.12129	2	2	1	0	371	43.701	9.92	63.28	2
P47914	60S ribosomal protein L29 OS=Homo sapiens GN=RPL29 PE=1 SV=2	9.43396	1	1	1	1	159	17.741	11.66	62.8	1
Q9H707	Zinc finger protein 552 OS=Homo sapiens GN=ZNF552 PE=1 SV=2	12.285	3	4	3	1	407	46.168	8.51	62.609	3
Q96ME7	Zinc finger protein 512 OS=Homo sapiens GN=ZNF512 PE=1 SV=2	3.1746	1	2	1	1	567	64.641	9.76	62.43	1
P46781	40S ribosomal protein S9 OS=Homo sapiens GN=RPS9 PE=1 SV=3	10.3093	2	2	2	1	194	22.578	10.65	61.34	2
A6NHQ2	rRNA/tRNA 2'-O-methyltransferase fibrillarin-like protein 1 OS=Homo sapiens GN=FBLL1 PE=3 SV=2	6.58683	2	2	2	1	334	34.782	10.35	61.2612	2
Q96L21	60S ribosomal protein L10-like OS=Homo sapiens GN=RPL10L PE=1 SV=3	5.60748	1	2	1	1	214	24.503	10.01	60.91	1
Q13557	Calcium/calmodulin-dependent protein kinase type II subunit delta OS=Homo sapiens GN=CAMK2D PE=1 SV=3	4.80962	2	2	2	1	499	56.334	7.25	60.56	2
Q03936	Zinc finger protein 92 OS=Homo sapiens GN=ZNF92 PE=2 SV=2	11.6041	3	3	1	1	586	68.442	9.28	60.2964	3
O60765	Zinc finger protein 354A OS=Homo sapiens GN=ZNF354A PE=2 SV=2	6.77686	4	4	3	1	605	69.193	9.57	60.0993	4
O60885	Bromodomain-containing protein 4 OS=Homo sapiens GN=BRD4 PE=1 SV=2	2.12922	2	2	2	1	1362	152.124	9.19	59.59	2
P60174	Triosephosphate isomerase OS=Homo sapiens GN=TPI1 PE=1 SV=3	5.24476	1	1	1	1	286	30.772	5.92	59	1
P25490	Transcriptional repressor protein YY1 OS=Homo sapiens GN=YY1 PE=1 SV=2	4.83092	1	1	1	1	414	44.685	6.25	58.75	1
Q13263	Transcription intermediary factor 1-beta OS=Homo sapiens GN=TRIM28 PE=1 SV=5	5.26946	3	3	3	1	835	88.493	5.77	58.61	3
Q9HCG1	Zinc finger protein 160 OS=Homo sapiens GN=ZNF160 PE=2 SV=3	1.46699	1	1	0	2	818	94.051	9.28	58.47	1
Q14247	Src substrate cortactin OS=Homo sapiens GN=CTTN PE=1 SV=2	2.36364	1	1	1	1	550	61.549	5.4	57.47	1
Q13106	Zinc finger protein 154 OS=Homo sapiens GN=ZNF154 PE=2 SV=3	3.43249	1	2	1	1	437	49.833	8.81	57.3897	1
Q9Y462	Zinc finger protein 711 OS=Homo sapiens GN=ZNF711 PE=1 SV=2	2.75953	1	1	1	1	761	86.19	6.87	57.15	1
P49368	T-complex protein 1 subunit gamma OS=Homo sapiens GN=CCT3 PE=1 SV=4	2.01835	1	1	1	1	545	60.495	6.49	56.92	1
Q13310	Polyadenylate-binding protein 4 OS=Homo sapiens GN=PABPC4 PE=1 SV=1	6.21118	4	4	2	1	644	70.738	9.26	56.67	4
P78344	Eukaryotic translation initiation factor 4 gamma 2 OS=Homo sapiens GN=EIF4G2 PE=1 SV=1	2.20507	1	1	1	1	907	102.297	7.14	56.18	1
Q9UFB7	Zinc finger and BTB domain-containing protein 47 OS=Homo sapiens GN=ZBTB47 PE=2 SV=3	3.61446	2	2	2	1	747	82.708	5.76	55.97	2
P11021	78 kDa glucose-regulated protein OS=Homo sapiens GN=HSPA5 PE=1 SV=2	1.68196	1	1	0	2	654	72.288	5.16	54.28	1
P32119	Peroxiredoxin-2 OS=Homo sapiens GN=PRDX2 PE=1 SV=5	5.55556	1	1	1	1	198	21.878	5.97	54.15	1
P14136	Glial fibrillary acidic protein OS=Homo sapiens GN=GFAP PE=1 SV=1	2.5463	1	1	1	1	432	49.85	5.52	54.09	1
Q6KB66	Keratin, type II cytoskeletal 80 OS=Homo sapiens GN=KRT80 PE=1 SV=2	2.43363	1	1	1	1	452	50.494	5.67	54.09	1
Q92908	Transcription factor GATA-6 OS=Homo sapiens GN=GATA6 PE=1 SV=2	2.35294	1	1	1	1	595	59.995	8.35	53.59	1
Q6NVV1	Putative 60S ribosomal protein L13a protein RPL13AP3 OS=Homo sapiens GN=RPL13AP3 PE=5 SV=1	10.7843	1	1	1	1	102	12.127	10.76	53.47	1
P40429	60S ribosomal protein L13a OS=Homo sapiens GN=RPL13A PE=1 SV=2	5.41872	1	1	1	1	203	23.562	10.93	53.47	1
P05386	60S acidic ribosomal protein P1 OS=Homo sapiens GN=RPLP1 PE=1 SV=1	14.0351	1	1	1	1	114	11.507	4.32	53.41	1
Q9NSB4	Keratin, type II cuticular Hb2 OS=Homo sapiens GN=KRT82 PE=3 SV=3	1.75439	2	2	0	0	513	56.616	6.74	51.99	2
Q3SY84	Keratin, type II cytoskeletal 71 OS=Homo sapiens GN=KRT71 PE=1 SV=3	1.72084	2	2	0	3	523	57.256	6.61	51.99	2
Q7RTS7	Keratin, type II cytoskeletal 74 OS=Homo sapiens GN=KRT74 PE=1 SV=2	1.70132	2	2	0	3	529	57.83	7.71	51.99	2
Q86Y46	Keratin, type II cytoskeletal 73 OS=Homo sapiens GN=KRT73 PE=1 SV=1	1.66667	2	2	0	3	540	58.887	7.23	51.99	2
Q9NSB2	Keratin, type II cuticular Hb4 OS=Homo sapiens GN=KRT84 PE=2 SV=2	1.5	2	2	0	3	600	64.801	7.56	51.99	2
Q9UL18	Protein argonaute-1 OS=Homo sapiens GN=AGO1 PE=1 SV=3	1.51692	1	1	1	1	857	97.152	9.16	51.83	1
Q9H9G7	Protein argonaute-3 OS=Homo sapiens GN=AGO3 PE=1 SV=2	1.51163	1	1	1	1	860	97.298	9.11	51.83	1
Q14593	Zinc finger protein 273 OS=Homo sapiens GN=ZNF273 PE=1 SV=3	3.51494	2	2	1	1	569	64.929	9.54	51.3773	2
Q9H8G1	Zinc finger protein 430 OS=Homo sapiens GN=ZNF430 PE=1 SV=3	5.26316	2	2	1	1	570	66.275	8.65	51.3773	2
Q13509	Tubulin beta-3 chain OS=Homo sapiens GN=TUBB3 PE=1 SV=2	5.55556	2	2	2	1	450	50.4	4.93	50.36	2
Q499Z4	Zinc finger protein 672 OS=Homo sapiens GN=ZNF672 PE=2 SV=2	5.75221	2	2	2	1	452	50.192	9.89	50.2452	2
O75437	Zinc finger protein 254 OS=Homo sapiens GN=ZNF254 PE=2 SV=3	8.80121	3	3	2	1	659	77.11	9.28	50.063	3
Q05481	Zinc finger protein 91 OS=Homo sapiens GN=ZNF91 PE=2 SV=2	8.39631	4	5	3	1	1191	137.128	9.32	50.063	4
P49407	Beta-arrestin-1 OS=Homo sapiens GN=ARRB1 PE=1 SV=2	5.26316	2	2	1	1	418	47.036	6.2	49.8379	2
Q96KK5	Histone H2A type 1-H OS=Homo sapiens GN=HIST1H2AH PE=1 SV=3	7.03125	1	1	1	1	128	13.898	10.89	49.54	1
Q99878	Histone H2A type 1-J OS=Homo sapiens GN=HIST1H2AJ PE=1 SV=3	7.03125	1	1	1	1	128	13.928	10.89	49.54	1
Q16777	Histone H2A type 2-C OS=Homo sapiens GN=HIST2H2AC PE=1 SV=4	6.97674	1	1	1	1	129	13.98	10.9	49.54	1
Q8IUE6	Histone H2A type 2-B OS=Homo sapiens GN=HIST2H2AB PE=1 SV=3	6.92308	1	1	1	1	130	13.987	10.89	49.54	1
Q9BTM1	Histone H2A.J OS=Homo sapiens GN=H2AFJ PE=1 SV=1	6.97674	1	1	1	1	129	14.011	10.9	49.54	1
P0C0S8	Histone H2A type 1 OS=Homo sapiens GN=HIST1H2AG PE=1 SV=2	6.92308	1	1	1	1	130	14.083	10.9	49.54	1
Q6FI13	Histone H2A type 2-A OS=Homo sapiens GN=HIST2H2AA3 PE=1 SV=3	6.92308	1	1	1	1	130	14.087	10.9	49.54	1
Q93077	Histone H2A type 1-C OS=Homo sapiens GN=HIST1H2AC PE=1 SV=3	6.92308	1	1	1	1	130	14.097	11.05	49.54	1
P20671	Histone H2A type 1-D OS=Homo sapiens GN=HIST1H2AD PE=1 SV=2	6.92308	1	1	1	1	130	14.099	10.9	49.54	1
Q7L7L0	Histone H2A type 3 OS=Homo sapiens GN=HIST3H2A PE=1 SV=3	6.92308	1	1	1	1	130	14.113	11.05	49.54	1
P04908	Histone H2A type 1-B/E OS=Homo sapiens GN=HIST1H2AB PE=1 SV=2	6.92308	1	1	1	1	130	14.127	11.05	49.54	1
Q96QV6	Histone H2A type 1-A OS=Homo sapiens GN=HIST1H2AA PE=1 SV=3	6.87023	1	1	1	1	131	14.225	10.86	49.54	1
P16104	Histone H2AX OS=Homo sapiens GN=H2AFX PE=1 SV=2	6.29371	1	1	1	1	143	15.135	10.74	49.54	1
Q8IWX8	Calcium homeostasis endoplasmic reticulum protein OS=Homo sapiens GN=CHERP PE=1 SV=3	6.87773	5	5	5	1	916	103.637	9.04	49.51	5
P0DMR1	Heterogeneous nuclear ribonucleoprotein C-like 4 OS=Homo sapiens GN=HNRNPCL4 PE=3 SV=1	4.09556	1	1	1	1	293	32.01	5.68	49.23	1
B2RXH8	Heterogeneous nuclear ribonucleoprotein C-like 2 OS=Homo sapiens GN=HNRNPCL2 PE=2 SV=1	4.09556	1	1	1	1	293	32.053	5.44	49.23	1
O60812	Heterogeneous nuclear ribonucleoprotein C-like 1 OS=Homo sapiens GN=HNRNPCL1 PE=2 SV=1	4.09556	1	1	1	1	293	32.123	5.06	49.23	1
P07910	Heterogeneous nuclear ribonucleoproteins C1/C2 OS=Homo sapiens GN=HNRNPC PE=1 SV=4	3.92157	1	1	1	1	306	33.65	5.08	49.23	1
Q16600	Zinc finger protein 239 OS=Homo sapiens GN=ZNF239 PE=1 SV=3	3.27511	1	1	1	1	458	51.558	7.64	48.91	1
Q15366	Poly(rC)-binding protein 2 OS=Homo sapiens GN=PCBP2 PE=1 SV=1	3.56164	1	1	1	1	365	38.556	6.79	48.79	1
Q12834	Cell division cycle protein 20 homolog OS=Homo sapiens GN=CDC20 PE=1 SV=2	3.00601	1	1	1	1	499	54.689	9.23	48.52	1
P11940	Polyadenylate-binding protein 1 OS=Homo sapiens GN=PABPC1 PE=1 SV=2	4.40252	3	3	1	1	636	70.626	9.5	48.2533	3
P27816	Microtubule-associated protein 4 OS=Homo sapiens GN=MAP4 PE=1 SV=3	1.12847	1	1	1	1	1152	120.93	5.43	48.13	1
Q9Y2G7	Zinc finger protein 30 homolog OS=Homo sapiens GN=ZFP30 PE=2 SV=1	11.5607	2	5	1	1	519	61.518	8.91	48.05	2
Q8N0Y2	Zinc finger protein 444 OS=Homo sapiens GN=ZNF444 PE=1 SV=1	2.14067	1	1	1	1	327	35.182	8.56	47.9	1
P19338	Nucleolin OS=Homo sapiens GN=NCL PE=1 SV=3	1.26761	1	1	1	1	710	76.568	4.7	47.82	1
P15924	Desmoplakin OS=Homo sapiens GN=DSP PE=1 SV=3	0.905608	3	3	3	1	2871	331.569	6.81	47.82	3
P81605	Dermcidin OS=Homo sapiens GN=DCD PE=1 SV=2	12.7273	1	1	1	1	110	11.277	6.54	47.27	1
P05455	Lupus La protein OS=Homo sapiens GN=SSB PE=1 SV=2	2.69608	1	1	1	1	408	46.808	7.12	46.78	1
Q15365	Poly(rC)-binding protein 1 OS=Homo sapiens GN=PCBP1 PE=1 SV=2	4.49438	1	1	1	1	356	37.474	7.09	46.58	1
Q8TAQ5	Zinc finger protein 420 OS=Homo sapiens GN=ZNF420 PE=1 SV=1	17.7326	4	5	2	1	688	80.195	8.62	46.43	4
O00425	Insulin-like growth factor 2 mRNA-binding protein 3 OS=Homo sapiens GN=IGF2BP3 PE=1 SV=2	2.41796	1	1	1	1	579	63.666	8.87	46.38	1
Q14525	Keratin, type I cuticular Ha3-II OS=Homo sapiens GN=KRT33B PE=1 SV=3	1.73267	1	1	0	3	404	46.185	4.84	46.27	1
Q15323	Keratin, type I cuticular Ha1 OS=Homo sapiens GN=KRT31 PE=1 SV=3	1.68269	1	1	0	3	416	47.207	4.88	46.27	1
P05783	Keratin, type I cytoskeletal 18 OS=Homo sapiens GN=KRT18 PE=1 SV=2	1.62791	1	1	0	3	430	48.029	5.45	46.27	1
O76014	Keratin, type I cuticular Ha7 OS=Homo sapiens GN=KRT37 PE=3 SV=3	1.55902	1	1	0	3	449	49.715	4.96	46.27	1
Q14532	Keratin, type I cuticular Ha2 OS=Homo sapiens GN=KRT32 PE=2 SV=3	1.5625	1	1	0	3	448	50.31	4.84	46.27	1
Q92764	Keratin, type I cuticular Ha5 OS=Homo sapiens GN=KRT35 PE=2 SV=5	1.53846	1	1	0	3	455	50.329	4.91	46.27	1
O76015	Keratin, type I cuticular Ha8 OS=Homo sapiens GN=KRT38 PE=1 SV=3	1.53509	1	1	0	3	456	50.447	4.84	46.27	1
O76013	Keratin, type I cuticular Ha6 OS=Homo sapiens GN=KRT36 PE=2 SV=1	1.49893	1	1	0	3	467	52.214	4.94	46.27	1
Q8N720	Zinc finger protein 655 OS=Homo sapiens GN=ZNF655 PE=1 SV=3	2.64766	1	1	1	1	491	57.371	7.14	45.96	1
Q8WXF1	Paraspeckle component 1 OS=Homo sapiens GN=PSPC1 PE=1 SV=1	1.33843	1	1	1	1	523	58.706	6.67	45.81	1
P18621	60S ribosomal protein L17 OS=Homo sapiens GN=RPL17 PE=1 SV=3	5.43478	1	1	1	1	184	21.383	10.17	45.28	1
P61353	60S ribosomal protein L27 OS=Homo sapiens GN=RPL27 PE=1 SV=2	12.5	2	2	2	1	136	15.788	10.56	44.75	2
P62910	60S ribosomal protein L32 OS=Homo sapiens GN=RPL32 PE=1 SV=2	14.8148	2	2	2	1	135	15.85	11.33	43.99	2
O43390	Heterogeneous nuclear ribonucleoprotein R OS=Homo sapiens GN=HNRNPR PE=1 SV=1	1.89573	1	1	1	1	633	70.899	8.13	43.83	1
Q96CX3	Zinc finger protein 501 OS=Homo sapiens GN=ZNF501 PE=2 SV=2	11.0701	2	2	2	1	271	31.158	9.19	43.32	2
Q9NX05	Constitutive coactivator of PPAR-gamma-like protein 2 OS=Homo sapiens GN=FAM120C PE=2 SV=3	1.27737	1	1	1	1	1096	120.511	9.03	43.09	1
P02545	Prelamin-A/C OS=Homo sapiens GN=LMNA PE=1 SV=1	2.10843	1	1	1	1	664	74.095	7.02	42.86	1
Q9UII5	Zinc finger protein 107 OS=Homo sapiens GN=ZNF107 PE=2 SV=1	9.83397	3	3	1	0	783	90.614	9.31	42.2385	3
O75319	RNA/RNP complex-1-interacting phosphatase OS=Homo sapiens GN=DUSP11 PE=1 SV=1	4.84848	1	1	1	1	330	38.915	9.41	42.21	1
Q96RE9	Zinc finger protein 300 OS=Homo sapiens GN=ZNF300 PE=1 SV=1	2.48344	1	2	0	2	604	68.699	8.7	42.03	1
Q8IYN0	Zinc finger protein 100 OS=Homo sapiens GN=ZNF100 PE=2 SV=2	5.90406	3	3	2	1	542	62.704	8.94	41.9673	3
Q969J2	Zinc finger protein with KRAB and SCAN domains 4 OS=Homo sapiens GN=ZKSCAN4 PE=1 SV=1	2.75229	1	1	1	1	545	61.54	7.61	41.91	1
B7Z6K7	Putative uncharacterized zinc finger protein 814 OS=Homo sapiens GN=ZNF814 PE=1 SV=2	4.21053	2	3	1	0	855	97.275	8.85	41.8493	2
E7ETH6	Zinc finger protein 587B OS=Homo sapiens GN=ZNF587B PE=1 SV=1	8.70647	2	2	2	1	402	45.512	8.38	40.88	2
Q14566	DNA replication licensing factor MCM6 OS=Homo sapiens GN=MCM6 PE=1 SV=1	1.58343	1	1	1	1	821	92.831	5.41	40.68	1
Q9UQM7	Calcium/calmodulin-dependent protein kinase type II subunit alpha OS=Homo sapiens GN=CAMK2A PE=1 SV=2	2.51046	1	1	1	1	478	54.054	7.08	40.63	1
Q13555	Calcium/calmodulin-dependent protein kinase type II subunit gamma OS=Homo sapiens GN=CAMK2G PE=1 SV=3	2.15054	1	1	1	1	558	62.57	7.83	40.63	1
Q13554	Calcium/calmodulin-dependent protein kinase type II subunit beta OS=Homo sapiens GN=CAMK2B PE=1 SV=3	1.8018	1	1	1	1	666	72.632	7.27	40.63	1
P62841	40S ribosomal protein S15 OS=Homo sapiens GN=RPS15 PE=1 SV=2	8.27586	1	1	1	1	145	17.029	10.39	40.49	1
Q659C4	La-related protein 1B OS=Homo sapiens GN=LARP1B PE=1 SV=2	1.53173	1	1	1	1	914	105.257	7.61	40.26	1
Q6PKG0	La-related protein 1 OS=Homo sapiens GN=LARP1 PE=1 SV=2	1.27737	1	1	1	1	1096	123.434	8.82	40.26	1
Q9Y2J4	Angiomotin-like protein 2 OS=Homo sapiens GN=AMOTL2 PE=1 SV=3	0.898588	1	1	1	1	779	85.713	7.3	40.02	1
Q8IY63	Angiomotin-like protein 1 OS=Homo sapiens GN=AMOTL1 PE=1 SV=1	0.732218	1	1	1	1	956	106.508	7.11	40.02	1
A6NNZ2	Tubulin beta-8 chain-like protein LOC260334 OS=Homo sapiens PE=1 SV=1	2.25225	1	1	1	1	444	49.541	4.86	39.88	1
P04350	Tubulin beta-4A chain OS=Homo sapiens GN=TUBB4A PE=1 SV=2	2.25225	1	1	1	1	444	49.554	4.88	39.88	1
Q3ZCM7	Tubulin beta-8 chain OS=Homo sapiens GN=TUBB8 PE=1 SV=2	2.25225	1	1	1	1	444	49.744	4.89	39.88	1
Q9BUF5	Tubulin beta-6 chain OS=Homo sapiens GN=TUBB6 PE=1 SV=1	2.24215	1	1	1	1	446	49.825	4.88	39.88	1
Q9H4B7	Tubulin beta-1 chain OS=Homo sapiens GN=TUBB1 PE=1 SV=1	2.21729	1	1	1	1	451	50.295	5.17	39.88	1
A6NFI3	Zinc finger protein 316 OS=Homo sapiens GN=ZNF316 PE=1 SV=1	2.29084	1	2	1	1	1004	108.37	5.31	39.71	1
Q8IYX0	Zinc finger protein 679 OS=Homo sapiens GN=ZNF679 PE=1 SV=2	4.37956	2	2	0	2	411	47.148	8.91	39.0773	2
P0CB33	Putative zinc finger protein 735 OS=Homo sapiens GN=ZNF735 PE=5 SV=1	4.36893	2	2	0	2	412	47.534	9.11	39.0773	2
Q5JVG8	Zinc finger protein 506 OS=Homo sapiens GN=ZNF506 PE=2 SV=2	6.30631	2	2	0	2	444	51.503	9.29	39.0773	2
Q96H40	Zinc finger protein 486 OS=Homo sapiens GN=ZNF486 PE=2 SV=4	3.88769	2	2	0	2	463	53.596	9.1	39.0773	2
Q15928	Zinc finger protein 141 OS=Homo sapiens GN=ZNF141 PE=1 SV=1	3.79747	2	2	0	2	474	55.214	9.31	39.0773	2
Q96JC4	Zinc finger protein 479 OS=Homo sapiens GN=ZNF479 PE=2 SV=1	3.43511	2	2	0	2	524	60.559	8.95	39.0773	2
O75373	Zinc finger protein 737 OS=Homo sapiens GN=ZNF737 PE=2 SV=3	3.35821	2	2	1	1	536	61.891	9.26	39.0773	2
Q9Y2Q1	Zinc finger protein 257 OS=Homo sapiens GN=ZNF257 PE=2 SV=2	8.52575	2	2	0	2	563	65.736	9.01	39.0773	2
A6NK75	Zinc finger protein 98 OS=Homo sapiens GN=ZNF98 PE=2 SV=4	3.14685	2	2	1	1	572	65.756	9.17	39.0773	2
Q6ZN08	Putative zinc finger protein 66 OS=Homo sapiens GN=ZNF66 PE=5 SV=3	4.88656	2	2	0	2	573	65.831	9.33	39.0773	2
B4DXR9	Zinc finger protein 732 OS=Homo sapiens GN=ZNF732 PE=2 SV=1	3.07692	2	2	0	2	585	67.796	8.98	39.0773	2
Q03923	Zinc finger protein 85 OS=Homo sapiens GN=ZNF85 PE=1 SV=3	9.7479	2	2	1	1	595	68.691	9.32	39.0773	2
A8MTY0	Zinc finger protein 724 OS=Homo sapiens GN=ZNF724 PE=2 SV=3	6.13893	2	2	1	1	619	71.126	9.11	39.0773	2
P0DKX0	Zinc finger protein 728 OS=Homo sapiens GN=ZNF728 PE=3 SV=1	2.89389	2	2	1	1	622	71.754	9.14	39.0773	2
Q96N22	Zinc finger protein 681 OS=Homo sapiens GN=ZNF681 PE=2 SV=2	4.34109	2	2	1	1	645	75.011	9.09	39.0773	2
A6NNF4	Zinc finger protein 726 OS=Homo sapiens GN=ZNF726 PE=2 SV=4	7.85908	2	2	1	1	738	85.483	9.09	39.0773	2
P17038	Zinc finger protein 43 OS=Homo sapiens GN=ZNF43 PE=2 SV=4	3.46106	2	2	1	1	809	94.063	9.19	39.0773	2
A6NN14	Zinc finger protein 729 OS=Homo sapiens GN=ZNF729 PE=2 SV=4	5.43131	2	2	0	2	1252	144.926	9.5	39.0773	2
P23396	40S ribosomal protein S3 OS=Homo sapiens GN=RPS3 PE=1 SV=2	5.34979	1	1	1	1	243	26.671	9.66	39.03	1
Q5SVQ8	Zinc finger and BTB domain-containing protein 41 OS=Homo sapiens GN=ZBTB41 PE=1 SV=1	0.990099	1	1	1	1	909	105.125	7.93	38.91	1
Q9Y2Z0	Protein SGT1 homolog OS=Homo sapiens GN=SUGT1 PE=1 SV=3	3.28767	1	1	1	1	365	40.998	5.16	38.85	1
Q8N1A0	Keratin-like protein KRT222 OS=Homo sapiens GN=KRT222 PE=2 SV=1	3.05085	1	1	0	2	295	34.137	5.87	38.53	1
Q86T29	Zinc finger protein 605 OS=Homo sapiens GN=ZNF605 PE=2 SV=1	1.24805	1	1	1	1	641	74.328	9.11	38.44	1
Q9UNX3	60S ribosomal protein L26-like 1 OS=Homo sapiens GN=RPL26L1 PE=1 SV=1	4.82759	1	1	1	1	145	17.246	10.55	37.07	1
P61254	60S ribosomal protein L26 OS=Homo sapiens GN=RPL26 PE=1 SV=1	4.82759	1	1	1	1	145	17.248	10.55	37.07	1
O00193	Small acidic protein OS=Homo sapiens GN=SMAP PE=1 SV=1	8.74317	1	1	1	1	183	20.32	4.72	35.79	1
Q15527	Surfeit locus protein 2 OS=Homo sapiens GN=SURF2 PE=1 SV=3	10.9375	2	2	2	1	256	29.629	9.22	35.24	2
Q96LW1	Zinc finger protein 354B OS=Homo sapiens GN=ZNF354B PE=2 SV=1	3.43137	2	2	1	1	612	70.484	9.5	35.1429	2
P39019	40S ribosomal protein S19 OS=Homo sapiens GN=RPS19 PE=1 SV=2	6.2069	1	1	1	1	145	16.051	10.32	34.69	1
Q8TAV0	Protein FAM76A OS=Homo sapiens GN=FAM76A PE=2 SV=1	3.58306	1	1	1	1	307	35.027	9.19	34.58	1
P17026	Zinc finger protein 22 OS=Homo sapiens GN=ZNF22 PE=1 SV=3	6.69643	1	1	0	0	224	25.899	10.04	34.37	1
P52742	Zinc finger protein 135 OS=Homo sapiens GN=ZNF135 PE=2 SV=3	4.55927	1	2	0	0	658	75.213	8.15	34.37	1
Q96PV7	Protein FAM193B OS=Homo sapiens GN=FAM193B PE=1 SV=3	2.99335	2	2	2	1	902	96.482	7.9	34.31	2
Q8TD47	40S ribosomal protein S4, Y isoform 2 OS=Homo sapiens GN=RPS4Y2 PE=2 SV=3	2.6616	1	1	1	1	263	29.277	10.08	33.79	1
P62701	40S ribosomal protein S4, X isoform OS=Homo sapiens GN=RPS4X PE=1 SV=2	2.6616	1	1	1	1	263	29.579	10.15	33.79	1
P17040	Zinc finger and SCAN domain-containing protein 20 OS=Homo sapiens GN=ZSCAN20 PE=2 SV=3	1.43816	1	1	1	1	1043	117.467	6.43	33.68	1
Q68DY1	Zinc finger protein 626 OS=Homo sapiens GN=ZNF626 PE=2 SV=2	3.78788	1	1	0	6	528	60.853	9.1	33.56	1
Q9P255	Zinc finger protein 492 OS=Homo sapiens GN=ZNF492 PE=2 SV=2	1.88324	1	1	0	6	531	61.118	9.25	33.56	1
Q96N38	Zinc finger protein 714 OS=Homo sapiens GN=ZNF714 PE=2 SV=3	1.80505	1	1	0	6	554	63.842	9.1	33.56	1
Q8TD23	Zinc finger protein 675 OS=Homo sapiens GN=ZNF675 PE=1 SV=3	3.52113	1	1	0	6	568	66.256	8.87	33.56	1
Q8TF32	Zinc finger protein 431 OS=Homo sapiens GN=ZNF431 PE=2 SV=2	5.55556	2	2	1	1	576	67.173	8.76	33.56	2
Q8N7Q3	Zinc finger protein 676 OS=Homo sapiens GN=ZNF676 PE=2 SV=2	5.10204	1	1	0	6	588	67.58	8.87	33.56	1
Q96N58	Zinc finger protein 578 OS=Homo sapiens GN=ZNF578 PE=2 SV=2	1.69492	1	1	0	6	590	68.486	8.95	33.56	1
Q6ZR52	Zinc finger protein 493 OS=Homo sapiens GN=ZNF493 PE=2 SV=3	1.54799	1	1	0	6	646	75.293	9.31	33.56	1
Q9BRH9	Zinc finger protein 251 OS=Homo sapiens GN=ZNF251 PE=2 SV=4	1.49031	1	1	0	6	671	75.716	9.17	33.56	1
Q6ZNG1	Zinc finger protein 600 OS=Homo sapiens GN=ZNF600 PE=1 SV=2	1.38504	1	1	0	6	722	83.07	9.25	33.56	1
Q8N4W9	Zinc finger protein 808 OS=Homo sapiens GN=ZNF808 PE=2 SV=2	1.10742	1	1	0	6	903	104.757	9.48	33.56	1
P17017	Zinc finger protein 14 OS=Homo sapiens GN=ZNF14 PE=2 SV=3	1.55763	1	1	1	1	642	75.304	9.17	32.89	1
Q02413	Desmoglein-1 OS=Homo sapiens GN=DSG1 PE=1 SV=2	1.52526	1	1	1	1	1049	113.676	5.03	32.05	1
P60709	Actin, cytoplasmic 1 OS=Homo sapiens GN=ACTB PE=1 SV=1	4.8	1	1	0	0	375	41.71	5.48	31.94	1
P63261	Actin, cytoplasmic 2 OS=Homo sapiens GN=ACTG1 PE=1 SV=1	4.8	1	1	0	0	375	41.766	5.48	31.94	1
Q562R1	Beta-actin-like protein 2 OS=Homo sapiens GN=ACTBL2 PE=1 SV=2	4.78723	1	1	1	1	376	41.976	5.59	31.94	1
Q9NZT1	Calmodulin-like protein 5 OS=Homo sapiens GN=CALML5 PE=1 SV=2	9.58904	1	1	1	1	146	15.883	4.44	31.87	1
Q6ZN57	Zinc finger protein 2 homolog OS=Homo sapiens GN=ZFP2 PE=1 SV=1	2.81996	1	1	1	1	461	52.706	8.56	31.86	1
Q5T0B9	Zinc finger protein 362 OS=Homo sapiens GN=ZNF362 PE=1 SV=1	2.38095	1	1	1	1	420	45.785	9.64	31.04	1
Q8TF68	Zinc finger protein 384 OS=Homo sapiens GN=ZNF384 PE=1 SV=2	1.7331	1	1	1	1	577	63.179	8.95	31.04	1
P16415	Zinc finger protein 823 OS=Homo sapiens GN=ZNF823 PE=2 SV=2	1.47541	1	1	1	1	610	70.225	8.72	30.76	1
P07477	Trypsin-1 OS=Homo sapiens GN=PRSS1 PE=1 SV=1	4.04858	1	1	1	1	247	26.541	6.51	30.65	1
P63104	14-3-3 protein zeta/delta OS=Homo sapiens GN=YWHAZ PE=1 SV=1	4.08163	1	1	1	1	245	27.728	4.79	30.62	1
P31947	14-3-3 protein sigma OS=Homo sapiens GN=SFN PE=1 SV=1	4.03226	1	1	1	1	248	27.757	4.74	30.62	1
P31946	14-3-3 protein beta/alpha OS=Homo sapiens GN=YWHAB PE=1 SV=3	4.06504	1	1	1	1	246	28.065	4.83	30.62	1
Q04917	14-3-3 protein eta OS=Homo sapiens GN=YWHAH PE=1 SV=4	4.06504	1	1	1	1	246	28.201	4.84	30.62	1
P61981	14-3-3 protein gamma OS=Homo sapiens GN=YWHAG PE=1 SV=2	4.04858	1	1	1	1	247	28.285	4.89	30.62	1
P62258	14-3-3 protein epsilon OS=Homo sapiens GN=YWHAE PE=1 SV=1	3.92157	1	1	1	1	255	29.155	4.74	30.62	1
Q5T8P6	RNA-binding protein 26 OS=Homo sapiens GN=RBM26 PE=1 SV=3	1.19166	1	1	1	1	1007	113.527	9.16	30.55	1
P83881	60S ribosomal protein L36a OS=Homo sapiens GN=RPL36A PE=1 SV=2	8.49057	1	1	1	1	106	12.433	10.58	30.21	1
Q969Q0	60S ribosomal protein L36a-like OS=Homo sapiens GN=RPL36AL PE=1 SV=3	8.49057	1	1	1	1	106	12.461	10.65	30.21	1
P62424	60S ribosomal protein L7a OS=Homo sapiens GN=RPL7A PE=1 SV=2	4.13534	1	1	1	1	266	29.977	10.61	28.66	1
P01040	Cystatin-A OS=Homo sapiens GN=CSTA PE=1 SV=1	18.3673	1	1	1	1	98	11	5.5	28.59	1
Q13835	Plakophilin-1 OS=Homo sapiens GN=PKP1 PE=1 SV=2	2.00803	1	1	1	1	747	82.808	9.13	28.46	1
Q92616	eIF-2-alpha kinase activator GCN1 OS=Homo sapiens GN=GCN1 PE=1 SV=6	0.299513	1	1	0	0	2671	292.572	7.47	28.43	1
Q9ULV3	Cip1-interacting zinc finger protein OS=Homo sapiens GN=CIZ1 PE=1 SV=2	1.22494	1	1	1	1	898	99.983	6.11	27.4	1
P0CB38	Polyadenylate-binding protein 4-like OS=Homo sapiens GN=PABPC4L PE=2 SV=1	3.24324	1	1	1	1	370	41.827	9.5	27.09	1
P51858	Hepatoma-derived growth factor OS=Homo sapiens GN=HDGF PE=1 SV=1	11.25	1	1	1	1	240	26.772	4.73	26.57	1
Q15929	Putative zinc finger protein 56 OS=Homo sapiens GN=ZNF56 PE=5 SV=2	4.96894	1	1	0	4	161	18.639	8.56	26.37	1
Q5FWF6	Zinc finger protein 789 OS=Homo sapiens GN=ZNF789 PE=2 SV=3	1.88235	1	1	0	4	425	49.952	9.1	26.37	1
Q8N859	Zinc finger protein 713 OS=Homo sapiens GN=ZNF713 PE=2 SV=1	1.86047	1	1	0	4	430	50.14	6.98	26.37	1
Q8N9Z0	Zinc finger protein 610 OS=Homo sapiens GN=ZNF610 PE=2 SV=2	1.7316	1	1	0	4	462	53.455	9.2	26.37	1
Q3SXZ3	Zinc finger protein 718 OS=Homo sapiens GN=ZNF718 PE=2 SV=1	1.67364	1	1	0	4	478	55.369	9.45	26.37	1
A6NP11	Zinc finger protein 716 OS=Homo sapiens GN=ZNF716 PE=2 SV=4	1.61616	1	1	0	4	495	56.969	9.17	26.37	1
O75346	Zinc finger protein 253 OS=Homo sapiens GN=ZNF253 PE=2 SV=2	1.60321	1	1	0	4	499	57.565	9.16	26.37	1
Q8IW36	Zinc finger protein 695 OS=Homo sapiens GN=ZNF695 PE=1 SV=4	1.5534	1	1	0	4	515	60.109	8.65	26.37	1
Q8WV37	Zinc finger protein 480 OS=Homo sapiens GN=ZNF480 PE=1 SV=2	1.49533	1	1	0	4	535	61.669	9.06	26.37	1
Q8TB69	Zinc finger protein 519 OS=Homo sapiens GN=ZNF519 PE=2 SV=2	1.48148	1	1	0	4	540	62.979	9.36	26.37	1
A8MT65	Zinc finger protein 891 OS=Homo sapiens GN=ZNF891 PE=2 SV=2	1.47059	1	1	0	4	544	63.55	8.73	26.37	1
Q86XU0	Zinc finger protein 677 OS=Homo sapiens GN=ZNF677 PE=2 SV=1	1.36986	1	1	0	4	584	67.953	9.13	26.37	1
Q03938	Zinc finger protein 90 OS=Homo sapiens GN=ZNF90 PE=2 SV=3	1.33111	1	1	0	4	601	69.013	9.22	26.37	1
P17039	Zinc finger protein 30 OS=Homo sapiens GN=ZNF30 PE=2 SV=5	6.58106	2	5	0	0	623	71.371	9.07	26.37	2
Q3MIS6	Zinc finger protein 528 OS=Homo sapiens GN=ZNF528 PE=2 SV=1	1.27389	1	1	0	4	628	72.092	9.19	26.37	1
O14628	Zinc finger protein 195 OS=Homo sapiens GN=ZNF195 PE=1 SV=2	1.27186	1	1	0	4	629	72.285	8.09	26.37	1
Q8IYB9	Zinc finger protein 595 OS=Homo sapiens GN=ZNF595 PE=2 SV=1	1.23457	1	1	0	4	648	74.242	9.11	26.37	1
Q96JL9	Zinc finger protein 333 OS=Homo sapiens GN=ZNF333 PE=2 SV=3	1.20301	1	1	0	4	665	75.496	7.94	26.37	1
Q76KX8	Zinc finger protein 534 OS=Homo sapiens GN=ZNF534 PE=2 SV=1	1.18694	1	1	0	4	674	77.117	9.25	26.37	1
Q86V71	Zinc finger protein 429 OS=Homo sapiens GN=ZNF429 PE=2 SV=2	1.18694	1	1	1	1	674	78.102	9.39	26.37	1
Q86YE8	Zinc finger protein 573 OS=Homo sapiens GN=ZNF573 PE=2 SV=4	1.20301	1	1	0	4	665	78.131	9.16	26.37	1
Q9P2J8	Zinc finger protein 624 OS=Homo sapiens GN=ZNF624 PE=1 SV=3	0.924855	1	1	0	4	865	99.864	8.88	26.37	1
A8MXY4	Zinc finger protein 99 OS=Homo sapiens GN=ZNF99 PE=2 SV=3	0.925926	1	1	1	1	864	100.725	9.45	26.37	1
P59923	Zinc finger protein 445 OS=Homo sapiens GN=ZNF445 PE=1 SV=1	0.775946	1	1	0	4	1031	118.887	9.39	26.37	1
O43345	Zinc finger protein 208 OS=Homo sapiens GN=ZNF208 PE=2 SV=2	0.625	1	1	1	1	1280	147.39	9.01	26.37	1
Q96SB3	Neurabin-2 OS=Homo sapiens GN=PPP1R9B PE=1 SV=2	0.858896	1	1	1	1	815	89.138	4.97	25.9	1
Q9Y2W1	Thyroid hormone receptor-associated protein 3 OS=Homo sapiens GN=THRAP3 PE=1 SV=2	1.36126	1	1	1	1	955	108.601	10.15	25.77	1
Q9GZP4	PITH domain-containing protein 1 OS=Homo sapiens GN=PITHD1 PE=1 SV=1	3.31754	1	1	1	1	211	24.163	5.74	25.66	1
Q969X6	U3 small nucleolar RNA-associated protein 4 homolog OS=Homo sapiens GN=UTP4 PE=1 SV=1	4.22741	2	2	2	1	686	76.841	8.85	24.86	2
Q32P51	Heterogeneous nuclear ribonucleoprotein A1-like 2 OS=Homo sapiens GN=HNRNPA1L2 PE=2 SV=2	4.0625	1	1	1	1	320	34.204	9	24.18	1
Q9Y520	Protein PRRC2C OS=Homo sapiens GN=PRRC2C PE=1 SV=4	0.345304	1	1	1	1	2896	316.718	9.13	23.84	1
P49321	Nuclear autoantigenic sperm protein OS=Homo sapiens GN=NASP PE=1 SV=2	1.64975	1	1	1	1	788	85.186	4.3	22.8	1
Q96T37	Putative RNA-binding protein 15 OS=Homo sapiens GN=RBM15 PE=1 SV=2	0.716479	1	1	1	1	977	107.124	10.08	22.71	1
Q16543	Hsp90 co-chaperone Cdc37 OS=Homo sapiens GN=CDC37 PE=1 SV=1	7.40741	2	2	2	1	378	44.44	5.25	22.34	2
P62280	40S ribosomal protein S11 OS=Homo sapiens GN=RPS11 PE=1 SV=3	4.43038	1	1	1	1	158	18.419	10.3	21.86	1
P62491	Ras-related protein Rab-11A OS=Homo sapiens GN=RAB11A PE=1 SV=3	5.09259	1	1	1	1	216	24.378	6.57	21.81	1
Q15907	Ras-related protein Rab-11B OS=Homo sapiens GN=RAB11B PE=1 SV=4	5.04587	1	1	1	1	218	24.473	5.94	21.81	1
Q9BRD0	BUD13 homolog OS=Homo sapiens GN=BUD13 PE=1 SV=1	2.90792	2	2	2	1	619	70.478	9.86	21.03	2
Q9H361	Polyadenylate-binding protein 3 OS=Homo sapiens GN=PABPC3 PE=1 SV=2	1.42631	1	1	1	1	631	69.987	9.67	20.91	1
P18077	60S ribosomal protein L35a OS=Homo sapiens GN=RPL35A PE=1 SV=2	8.18182	1	1	1	1	110	12.53	11.06	19.99	1
Q9UPW0	Forkhead box protein J3 OS=Homo sapiens GN=FOXJ3 PE=1 SV=2	3.05466	1	1	1	1	622	68.917	7.09	18.59	1
P62995	Transformer-2 protein homolog beta OS=Homo sapiens GN=TRA2B PE=1 SV=1	3.47222	1	1	1	1	288	33.646	11.25	18.44	1
O95409	Zinc finger protein ZIC 2 OS=Homo sapiens GN=ZIC2 PE=1 SV=2	6.57895	2	2	2	1	532	54.971	8.41	17.3	2
Q9H853	Putative tubulin-like protein alpha-4B OS=Homo sapiens GN=TUBA4B PE=5 SV=2	4.97925	1	1	1	1	241	27.534	7.83	16.76	1
P21506	Zinc finger protein 10 OS=Homo sapiens GN=ZNF10 PE=1 SV=3	2.6178	1	1	1	1	573	66.412	8.32	16.32	1
Q8WZ74	Cortactin-binding protein 2 OS=Homo sapiens GN=CTTNBP2 PE=1 SV=1	0.481058	1	1	0	0	1663	180.938	7.93	16.03	1
O95201	Zinc finger protein 205 OS=Homo sapiens GN=ZNF205 PE=1 SV=2	3.06859	1	1	1	1	554	60.592	8.54	15.85	1
P51654	Glypican-3 OS=Homo sapiens GN=GPC3 PE=1 SV=1	2.58621	1	1	1	1	580	65.52	6.37	14.39	1
Q8N9L1	Zinc finger protein ZIC 4 OS=Homo sapiens GN=ZIC4 PE=2 SV=3	5.08982	1	1	1	1	334	36.543	9.52	13.4	1
Q15915	Zinc finger protein ZIC 1 OS=Homo sapiens GN=ZIC1 PE=1 SV=2	3.80313	1	1	1	1	447	48.278	8.44	13.4	1
O60481	Zinc finger protein ZIC 3 OS=Homo sapiens GN=ZIC3 PE=1 SV=1	3.64026	1	1	1	1	467	50.537	8.65	13.4	1
Q96T25	Zinc finger protein ZIC 5 OS=Homo sapiens GN=ZIC5 PE=1 SV=2	2.5641	1	1	1	1	663	68.404	8.76	13.4	1
Q6IS14	Eukaryotic translation initiation factor 5A-1-like OS=Homo sapiens GN=EIF5AL1 PE=2 SV=2	11.6883	1	1	1	1	154	16.762	5	0	1
Q9GZV4	Eukaryotic translation initiation factor 5A-2 OS=Homo sapiens GN=EIF5A2 PE=1 SV=3	11.7647	1	1	1	1	153	16.782	5.58	0	1
P63241	Eukaryotic translation initiation factor 5A-1 OS=Homo sapiens GN=EIF5A PE=1 SV=2	11.6883	1	1	1	1	154	16.821	5.24	0	1
Q16763	Ubiquitin-conjugating enzyme E2 S OS=Homo sapiens GN=UBE2S PE=1 SV=2	6.75676	1	1	1	1	222	23.831	8.38	0	1
Q05195	Max dimerization protein 1 OS=Homo sapiens GN=MXD1 PE=1 SV=1	4.52489	1	1	1	1	221	25.239	8.53	0	1
P18124	60S ribosomal protein L7 OS=Homo sapiens GN=RPL7 PE=1 SV=1	4.43548	1	1	1	1	248	29.207	10.65	0	1
P17041	Zinc finger protein 32 OS=Homo sapiens GN=ZNF32 PE=1 SV=2	4.0293	1	1	0	2	273	31.009	9.35	0	1
O00170	AH receptor-interacting protein OS=Homo sapiens GN=AIP PE=1 SV=2	2.12121	1	1	1	1	330	37.612	6.29	0	1
Q6AZW8	Zinc finger protein 660 OS=Homo sapiens GN=ZNF660 PE=1 SV=1	4.53172	1	1	0	2	331	38.246	9.32	0	1
Q8IZT8	Heparan sulfate glucosamine 3-O-sulfotransferase 5 OS=Homo sapiens GN=HS3ST5 PE=1 SV=1	4.62428	1	1	1	1	346	40.383	9.79	0	1
O43679	LIM domain-binding protein 2 OS=Homo sapiens GN=LDB2 PE=1 SV=1	3.75335	1	6	1	1	373	42.766	6.93	0	1
Q86U70	LIM domain-binding protein 1 OS=Homo sapiens GN=LDB1 PE=1 SV=2	3.40633	1	6	1	1	411	46.502	6.96	0	1
Q6UWZ7	BRCA1-A complex subunit Abraxas OS=Homo sapiens GN=FAM175A PE=1 SV=2	3.17848	1	1	1	1	409	46.633	7.05	0	1
Q3ZCT1	Zinc finger protein 260 OS=Homo sapiens GN=ZNF260 PE=1 SV=3	2.6699	1	2	0	3	412	47.191	9.07	0	1
Q96LW9	Zinc finger and SCAN domain-containing protein 31 OS=Homo sapiens GN=ZSCAN31 PE=1 SV=2	2.70936	1	2	0	3	406	47.263	6.89	0	1
Q6ZNG0	Zinc finger protein 620 OS=Homo sapiens GN=ZNF620 PE=2 SV=1	2.60664	1	2	0	3	422	48.472	8.29	0	1
Q6ZSS3	Zinc finger protein 621 OS=Homo sapiens GN=ZNF621 PE=2 SV=1	5.01139	2	3	0	2	439	49.173	8.94	0	2
Q969W8	Zinc finger protein 566 OS=Homo sapiens GN=ZNF566 PE=2 SV=1	13.1579	1	2	0	3	418	49.188	8.06	0	1
Q3KNS6	Zinc finger protein 829 OS=Homo sapiens GN=ZNF829 PE=2 SV=1	7.63889	1	2	0	3	432	50.109	7.93	0	1
Q00G26	Perilipin-5 OS=Homo sapiens GN=PLIN5 PE=1 SV=2	5.39957	1	1	1	1	463	50.76	5.2	0	1
Q8N8L2	Zinc finger protein 491 OS=Homo sapiens GN=ZNF491 PE=2 SV=1	2.51716	1	1	0	2	437	50.916	9.28	0	1
O43293	Death-associated protein kinase 3 OS=Homo sapiens GN=DAPK3 PE=1 SV=1	1.54185	1	1	0	0	454	52.503	6.89	0	1
Q96BR6	Zinc finger protein 669 OS=Homo sapiens GN=ZNF669 PE=2 SV=2	2.37069	1	2	0	3	464	52.563	8.72	0	1
Q9NQX6	Zinc finger protein 331 OS=Homo sapiens GN=ZNF331 PE=1 SV=1	7.12743	1	2	0	3	463	53.704	8.91	0	1
Q8NA42	Zinc finger protein 383 OS=Homo sapiens GN=ZNF383 PE=2 SV=1	6.94737	1	2	0	3	475	54.577	7.9	0	1
Q8N587	Zinc finger protein 561 OS=Homo sapiens GN=ZNF561 PE=2 SV=2	2.26337	1	2	0	3	486	55.161	8.82	0	1
Q14585	Zinc finger protein 345 OS=Homo sapiens GN=ZNF345 PE=2 SV=1	13.5246	1	2	0	3	488	55.347	8.34	0	1
Q8TA94	Zinc finger protein 563 OS=Homo sapiens GN=ZNF563 PE=2 SV=1	2.31092	1	2	0	3	476	55.398	9.14	0	1
Q8NDP4	Zinc finger protein 439 OS=Homo sapiens GN=ZNF439 PE=1 SV=1	2.20441	1	2	0	3	499	58.357	9.25	0	1
Q96NG8	Zinc finger protein 582 OS=Homo sapiens GN=ZNF582 PE=2 SV=1	6.38298	2	3	0	2	517	60.459	8.47	0	2
Q147U1	Zinc finger protein 846 OS=Homo sapiens GN=ZNF846 PE=1 SV=2	4.12758	1	2	0	3	533	60.513	9	0	1
Q9ULM2	Zinc finger protein 490 OS=Homo sapiens GN=ZNF490 PE=1 SV=2	2.0794	1	2	0	3	529	61.3	8.7	0	1
Q9UJL9	Zinc finger protein ZFP69B OS=Homo sapiens GN=ZFP69B PE=1 SV=2	2.05993	1	2	0	3	534	61.442	9.01	0	1
C9JN71	Zinc finger protein 878 OS=Homo sapiens GN=ZNF878 PE=3 SV=2	2.07156	1	2	0	3	531	61.5	9.45	0	1
Q96NI8	Zinc finger protein 570 OS=Homo sapiens GN=ZNF570 PE=2 SV=1	2.05224	1	2	0	3	536	62.29	8.28	0	1
Q8N9K5	Zinc finger protein 565 OS=Homo sapiens GN=ZNF565 PE=2 SV=2	2.04082	1	2	0	3	539	62.405	8.21	0	1
Q8N141	Zinc finger protein 82 homolog OS=Homo sapiens GN=ZFP82 PE=2 SV=1	8.27068	1	4	0	3	532	62.537	8.98	0	1
Q9BUY5	Zinc finger protein 426 OS=Homo sapiens GN=ZNF426 PE=1 SV=1	1.98556	1	2	0	3	554	63.065	7.74	0	1
Q8N2I2	Zinc finger protein 619 OS=Homo sapiens GN=ZNF619 PE=2 SV=1	1.96429	1	2	0	3	560	63.281	8.35	0	1
Q9HCL3	Zinc finger protein 14 homolog OS=Homo sapiens GN=ZFP14 PE=2 SV=2	12.3827	1	4	0	3	533	63.422	8.62	0	1
Q494X3	Zinc finger protein 404 OS=Homo sapiens GN=ZNF404 PE=1 SV=2	1.99275	1	2	0	3	552	65.382	9.14	0	1
Q9UC07	Zinc finger protein 69 OS=Homo sapiens GN=ZNF69 PE=1 SV=2	3.88693	1	2	0	3	566	65.718	8.85	0	1
Q6P280	Zinc finger protein 529 OS=Homo sapiens GN=ZNF529 PE=2 SV=2	1.95382	1	2	0	3	563	65.822	8.21	0	1
Q96ND8	Zinc finger protein 583 OS=Homo sapiens GN=ZNF583 PE=2 SV=2	1.93322	1	2	0	3	569	65.99	8.82	0	1
Q8TAF7	Zinc finger protein 461 OS=Homo sapiens GN=ZNF461 PE=2 SV=2	9.76909	1	4	0	3	563	66.171	8.25	0	1
Q6PDB4	Zinc finger protein 880 OS=Homo sapiens GN=ZNF880 PE=2 SV=2	1.90641	1	2	0	3	577	66.719	9.29	0	1
Q3KP31	Zinc finger protein 791 OS=Homo sapiens GN=ZNF791 PE=2 SV=1	1.90972	1	2	0	3	576	66.828	9.22	0	1
Q8IZD4	mRNA-decapping enzyme 1B OS=Homo sapiens GN=DCP1B PE=1 SV=2	4.21394	1	1	1	1	617	67.681	8.56	0	1
Q7Z3V5	Zinc finger protein 571 OS=Homo sapiens GN=ZNF571 PE=2 SV=3	1.80624	1	2	0	3	609	70.746	8.35	0	1
Q9H7R0	Zinc finger protein 442 OS=Homo sapiens GN=ZNF442 PE=2 SV=1	1.75439	1	2	0	3	627	72.816	8.7	0	1
Q9BX82	Zinc finger protein 471 OS=Homo sapiens GN=ZNF471 PE=2 SV=1	3.51438	1	2	0	3	626	72.961	8.56	0	1
Q8NEP9	Zinc finger protein 555 OS=Homo sapiens GN=ZNF555 PE=1 SV=4	3.50318	2	3	0	2	628	73.037	9.04	0	2
Q32M78	Zinc finger protein 699 OS=Homo sapiens GN=ZNF699 PE=1 SV=1	1.7134	1	2	0	3	642	73.907	8.24	0	1
Q3ZCX4	Zinc finger protein 568 OS=Homo sapiens GN=ZNF568 PE=2 SV=2	1.70807	1	2	0	3	644	74.32	8.22	0	1
Q6PG37	Zinc finger protein 790 OS=Homo sapiens GN=ZNF790 PE=2 SV=2	1.72956	1	2	0	3	636	74.523	8.47	0	1
Q8N972	Zinc finger protein 709 OS=Homo sapiens GN=ZNF709 PE=2 SV=1	1.71607	1	2	0	3	641	74.603	8.95	0	1
O14829	Serine/threonine-protein phosphatase with EF-hands 1 OS=Homo sapiens GN=PPEF1 PE=1 SV=1	7.50383	1	1	1	1	653	75.744	6.84	0	1
P15621	Zinc finger protein 44 OS=Homo sapiens GN=ZNF44 PE=2 SV=3	1.65913	1	2	0	3	663	76.473	8.68	0	1
Q8NDQ6	Zinc finger protein 540 OS=Homo sapiens GN=ZNF540 PE=1 SV=1	5	1	2	0	3	660	77.044	9.5	0	1
Q8N7M2	Zinc finger protein 283 OS=Homo sapiens GN=ZNF283 PE=2 SV=4	4.86009	1	2	0	3	679	77.891	8.28	0	1
O15060	Zinc finger and BTB domain-containing protein 39 OS=Homo sapiens GN=ZBTB39 PE=2 SV=1	1.54494	1	1	0	2	712	78.95	6.54	0	1
Q96SK3	Zinc finger protein 607 OS=Homo sapiens GN=ZNF607 PE=1 SV=3	1.58046	1	2	0	3	696	80.454	8.6	0	1
Q02040	A-kinase anchor protein 17A OS=Homo sapiens GN=AKAP17A PE=1 SV=2	2.01439	1	1	1	1	695	80.686	9.73	0	1
Q96MU6	Zinc finger protein 778 OS=Homo sapiens GN=ZNF778 PE=1 SV=3	1.50892	1	2	0	3	729	81.91	8.4	0	1
Q6ECI4	Zinc finger protein 470 OS=Homo sapiens GN=ZNF470 PE=2 SV=3	4.60251	1	2	0	3	717	82.597	8.57	0	1
Q9H0M5	Zinc finger protein 700 OS=Homo sapiens GN=ZNF700 PE=2 SV=1	1.48248	1	2	0	3	742	86.176	8.9	0	1
Q96ST2	Protein IWS1 homolog OS=Homo sapiens GN=IWS1 PE=1 SV=2	0.854701	1	1	1	1	819	91.899	4.69	0	1
Q9UJW7	Zinc finger protein 229 OS=Homo sapiens GN=ZNF229 PE=2 SV=3	1.81818	1	1	1	1	825	93.647	8.53	0	1
Q86UE3	Zinc finger protein 546 OS=Homo sapiens GN=ZNF546 PE=2 SV=2	2.63158	2	3	0	2	836	98.341	8.6	0	2
Q8NHY6	Zinc finger protein 28 homolog OS=Homo sapiens GN=ZFP28 PE=1 SV=1	1.26728	1	2	0	3	868	98.642	9.32	0	1
A8MQ14	Zinc finger protein 850 OS=Homo sapiens GN=ZNF850 PE=3 SV=2	2.01835	1	2	0	3	1090	125.35	8.7	0	1
Q9UKJ3	G patch domain-containing protein 8 OS=Homo sapiens GN=GPATCH8 PE=1 SV=2	0.998668	1	1	1	1	1502	164.098	8.66	0	1
A6NE52	WD repeat-containing protein 97 OS=Homo sapiens GN=WDR97 PE=2 SV=2	3.69914	1	1	1	1	1622	180.192	7.61	0	1
O00443	Phosphatidylinositol 4-phosphate 3-kinase C2 domain-containing subunit alpha OS=Homo sapiens GN=PIK3C2A PE=1 SV=2	0.415184	1	1	1	1	1686	190.559	8.02	0	1
Q00610	Clathrin heavy chain 1 OS=Homo sapiens GN=CLTC PE=1 SV=5	0.776119	1	1	1	1	1675	191.493	5.69	0	1
O75923	Dysferlin OS=Homo sapiens GN=DYSF PE=1 SV=1	0.817308	1	1	1	1	2080	237.144	5.64	0	1
O60673	DNA polymerase zeta catalytic subunit OS=Homo sapiens GN=REV3L PE=1 SV=2	0.223642	1	1	0	0	3130	352.554	8.47	0	1
P98164	Low-density lipoprotein receptor-related protein 2 OS=Homo sapiens GN=LRP2 PE=1 SV=3	0.451128	1	1	1	1	4655	521.616	5.08	0	1
Q8WXH0	Nesprin-2 OS=Homo sapiens GN=SYNE2 PE=1 SV=3	0.10167	1	1	0	0	6885	795.944	5.36	0	1

## Sheet: NleE WT(2)
Accession	Description	Coverage	# Peptides	# PSMs	# Unique Peptides	# Protein Groups	# AAs	MW [kDa]	calc. pI	Score Mascot	# Peptides Mascot
P63261	Actin, cytoplasmic 2 OS=Homo sapiens GN=ACTG1 PE=1 SV=1	72.8	19	37	1	1	375	41.766	5.48	1683.09	19
P60709	Actin, cytoplasmic 1 OS=Homo sapiens GN=ACTB PE=1 SV=1	72.8	19	36	1	1	375	41.71	5.48	1605.16	19
Q15233	Non-POU domain-containing octamer-binding protein OS=Homo sapiens GN=NONO PE=1 SV=4	69.4268	29	242	27	1	471	54.197	8.95	4839.58	29
P07437	Tubulin beta chain OS=Homo sapiens GN=TUBB PE=1 SV=2	66.2162	20	37	5	1	444	49.639	4.89	1249.85	20
P04264	Keratin, type II cytoskeletal 1 OS=Homo sapiens GN=KRT1 PE=1 SV=6	64.1304	37	108	33	1	644	65.999	8.12	4362.31	37
P68363	Tubulin alpha-1B chain OS=Homo sapiens GN=TUBA1B PE=1 SV=1	62.7494	20	34	1	1	451	50.12	5.06	1311.69	20
P68371	Tubulin beta-4B chain OS=Homo sapiens GN=TUBB4B PE=1 SV=1	62.6966	19	33	4	1	445	49.799	4.89	1147.73	19
P35908	Keratin, type II cytoskeletal 2 epidermal OS=Homo sapiens GN=KRT2 PE=1 SV=2	61.8153	35	75	28	1	639	65.393	8	2560.2	35
P0CG48	Polyubiquitin-C OS=Homo sapiens GN=UBC PE=1 SV=3	61.7518	5	8	5	1	685	76.992	7.66	240.543	5
P0CG47	Polyubiquitin-B OS=Homo sapiens GN=UBB PE=1 SV=1	61.5721	5	8	5	1	229	25.746	7.43	240.543	5
Q71U36	Tubulin alpha-1A chain OS=Homo sapiens GN=TUBA1A PE=1 SV=1	59.867	19	31	1	1	451	50.104	5.06	1165.06	19
Q9HCN8	Stromal cell-derived factor 2-like protein 1 OS=Homo sapiens GN=SDF2L1 PE=1 SV=2	59.7285	6	18	6	1	221	23.584	7.03	1076.27	6
P35527	Keratin, type I cytoskeletal 9 OS=Homo sapiens GN=KRT9 PE=1 SV=3	59.069	29	71	29	1	623	62.027	5.24	3389.94	29
P13645	Keratin, type I cytoskeletal 10 OS=Homo sapiens GN=KRT10 PE=1 SV=6	57.363	32	105	29	1	584	58.792	5.21	4136.32	32
Q9BQE3	Tubulin alpha-1C chain OS=Homo sapiens GN=TUBA1C PE=1 SV=1	56.3474	18	29	1	1	449	49.863	5.1	1104.26	18
Q4VCS5	Angiomotin OS=Homo sapiens GN=AMOT PE=1 SV=1	55.6273	42	200	42	1	1084	118.013	7.64	4230.64	42
P02533	Keratin, type I cytoskeletal 14 OS=Homo sapiens GN=KRT14 PE=1 SV=4	50.2119	21	33	10	1	472	51.529	5.16	1016.57	21
P04350	Tubulin beta-4A chain OS=Homo sapiens GN=TUBB4A PE=1 SV=2	49.5495	15	26	2	1	444	49.554	4.88	770.658	15
O43707	Alpha-actinin-4 OS=Homo sapiens GN=ACTN4 PE=1 SV=2	49.506	36	57	28	1	911	104.788	5.44	2185	36
Q13885	Tubulin beta-2A chain OS=Homo sapiens GN=TUBB2A PE=1 SV=1	46.5169	15	29	2	0	445	49.875	4.89	1041.54	15
Q9BVA1	Tubulin beta-2B chain OS=Homo sapiens GN=TUBB2B PE=1 SV=1	46.5169	15	29	2	0	445	49.921	4.89	1041.54	15
Q9UKV8	Protein argonaute-2 OS=Homo sapiens GN=AGO2 PE=1 SV=3	46.2165	27	33	20	1	859	97.146	9.19	813.274	27
Q13748	Tubulin alpha-3C/D chain OS=Homo sapiens GN=TUBA3C PE=1 SV=3	45.3333	14	25	1	1	450	49.928	5.1	958.717	14
P23246	Splicing factor, proline- and glutamine-rich OS=Homo sapiens GN=SFPQ PE=1 SV=2	43.9887	27	73	26	1	707	76.102	9.44	2195.86	27
P14866	Heterogeneous nuclear ribonucleoprotein L OS=Homo sapiens GN=HNRNPL PE=1 SV=2	43.9728	15	24	15	1	589	64.092	8.22	675.84	15
P68366	Tubulin alpha-4A chain OS=Homo sapiens GN=TUBA4A PE=1 SV=1	43.75	14	26	1	1	448	49.892	5.06	957.569	14
Q01082	Spectrin beta chain, non-erythrocytic 1 OS=Homo sapiens GN=SPTBN1 PE=1 SV=2	42.978	71	101	66	1	2364	274.439	5.57	3376.59	71
P51149	Ras-related protein Rab-7a OS=Homo sapiens GN=RAB7A PE=1 SV=1	42.5121	8	8	8	1	207	23.475	6.7	225.179	8
Q13813	Spectrin alpha chain, non-erythrocytic 1 OS=Homo sapiens GN=SPTAN1 PE=1 SV=3	42.4757	78	106	78	1	2472	284.364	5.35	4133.51	78
P63244	Receptor of activated protein C kinase 1 OS=Homo sapiens GN=RACK1 PE=1 SV=3	40.3785	9	12	9	1	317	35.055	7.69	519.795	9
P42677	40S ribosomal protein S27 OS=Homo sapiens GN=RPS27 PE=1 SV=3	39.2857	4	4	4	1	84	9.455	9.45	76.3367	4
Q7Z417	Nuclear fragile X mental retardation-interacting protein 2 OS=Homo sapiens GN=NUFIP2 PE=1 SV=1	38.9928	17	34	17	1	695	76.075	8.7	1251.59	17
P63104	14-3-3 protein zeta/delta OS=Homo sapiens GN=YWHAZ PE=1 SV=1	38.7755	9	9	7	1	245	27.728	4.79	288.111	9
Q6PEY2	Tubulin alpha-3E chain OS=Homo sapiens GN=TUBA3E PE=1 SV=2	38.4444	11	19	1	1	450	49.827	5.14	707.754	11
P52655	Transcription initiation factor IIA subunit 1 OS=Homo sapiens GN=GTF2A1 PE=1 SV=1	38.2979	5	15	5	1	376	41.488	4.55	137.02	5
Q9BTE3	Mini-chromosome maintenance complex-binding protein OS=Homo sapiens GN=MCMBP PE=1 SV=2	37.8505	19	28	19	1	642	72.934	5.87	868.766	19
P08779	Keratin, type I cytoskeletal 16 OS=Homo sapiens GN=KRT16 PE=1 SV=4	37.4207	15	22	6	1	473	51.236	5.05	645.344	15
O43143	Pre-mRNA-splicing factor ATP-dependent RNA helicase DHX15 OS=Homo sapiens GN=DHX15 PE=1 SV=2	37.1069	22	24	22	1	795	90.875	7.46	623.698	22
P63167	Dynein light chain 1, cytoplasmic OS=Homo sapiens GN=DYNLL1 PE=1 SV=1	37.0787	2	2	2	1	89	10.359	7.4	136.298	2
P62987	Ubiquitin-60S ribosomal protein L40 OS=Homo sapiens GN=UBA52 PE=1 SV=2	36.7188	5	8	5	1	128	14.719	9.83	240.543	5
Q99470	Stromal cell-derived factor 2 OS=Homo sapiens GN=SDF2 PE=1 SV=2	36.019	4	9	4	1	211	23.011	7.33	320.515	4
P68133	Actin, alpha skeletal muscle OS=Homo sapiens GN=ACTA1 PE=1 SV=1	35.809	11	13	2	1	377	42.024	5.39	311.244	11
P68032	Actin, alpha cardiac muscle 1 OS=Homo sapiens GN=ACTC1 PE=1 SV=1	35.809	11	13	2	1	377	41.992	5.39	311.244	11
P13647	Keratin, type II cytoskeletal 5 OS=Homo sapiens GN=KRT5 PE=1 SV=3	34.9153	23	30	12	1	590	62.34	7.74	812.599	23
Q92499	ATP-dependent RNA helicase DDX1 OS=Homo sapiens GN=DDX1 PE=1 SV=2	34.3243	20	26	20	1	740	82.38	7.23	605.536	20
Q96QC0	Serine/threonine-protein phosphatase 1 regulatory subunit 10 OS=Homo sapiens GN=PPP1R10 PE=1 SV=1	34.2553	20	30	20	1	940	98.996	9.17	864.472	20
Q00610	Clathrin heavy chain 1 OS=Homo sapiens GN=CLTC PE=1 SV=5	33.3731	38	51	38	1	1675	191.493	5.69	1731.93	38
P61962	DDB1- and CUL4-associated factor 7 OS=Homo sapiens GN=DCAF7 PE=1 SV=1	33.0409	8	10	8	1	342	38.901	5.52	380.454	8
Q15836	Vesicle-associated membrane protein 3 OS=Homo sapiens GN=VAMP3 PE=1 SV=3	33	2	4	2	1	100	11.302	8.79	182.74	2
P63267	Actin, gamma-enteric smooth muscle OS=Homo sapiens GN=ACTG2 PE=1 SV=1	32.9787	10	12	2	1	376	41.85	5.48	285.213	10
P62736	Actin, aortic smooth muscle OS=Homo sapiens GN=ACTA2 PE=1 SV=1	32.8912	10	12	2	1	377	41.982	5.39	285.213	10
P26599	Polypyrimidine tract-binding protein 1 OS=Homo sapiens GN=PTBP1 PE=1 SV=1	32.7684	8	13	8	1	531	57.186	9.17	578.589	8
Q9BWJ5	Splicing factor 3B subunit 5 OS=Homo sapiens GN=SF3B5 PE=1 SV=1	32.5581	2	2	2	1	86	10.129	6.35	35.59	2
P62258	14-3-3 protein epsilon OS=Homo sapiens GN=YWHAE PE=1 SV=1	32.549	7	7	5	1	255	29.155	4.74	160.343	7
P46776	60S ribosomal protein L27a OS=Homo sapiens GN=RPL27A PE=1 SV=2	31.7568	6	10	6	1	148	16.551	11	182.52	6
P04637	Cellular tumor antigen p53 OS=Homo sapiens GN=TP53 PE=1 SV=4	31.5522	7	11	7	1	393	43.625	6.79	308.671	7
P0C0S5	Histone H2A.Z OS=Homo sapiens GN=H2AFZ PE=1 SV=2	31.25	4	6	4	1	128	13.545	10.58	159.132	4
Q71UI9	Histone H2A.V OS=Homo sapiens GN=H2AFV PE=1 SV=3	31.25	4	6	4	1	128	13.501	10.58	159.132	4
O95881	Thioredoxin domain-containing protein 12 OS=Homo sapiens GN=TXNDC12 PE=1 SV=1	30.814	4	4	4	1	172	19.194	5.4	142.889	4
P61106	Ras-related protein Rab-14 OS=Homo sapiens GN=RAB14 PE=1 SV=4	30.6977	4	6	3	1	215	23.882	6.21	178.243	4
P02538	Keratin, type II cytoskeletal 6A OS=Homo sapiens GN=KRT6A PE=1 SV=3	30.6738	21	28	2	1	564	60.008	8	650.376	21
P00918	Carbonic anhydrase 2 OS=Homo sapiens GN=CA2 PE=1 SV=2	30.3846	6	10	6	1	260	29.228	7.4	170.319	6
P62979	Ubiquitin-40S ribosomal protein S27a OS=Homo sapiens GN=RPS27A PE=1 SV=2	30.1282	5	8	5	1	156	17.953	9.64	240.543	5
P62906	60S ribosomal protein L10a OS=Homo sapiens GN=RPL10A PE=1 SV=2	29.9539	6	10	6	1	217	24.816	9.94	234.987	6
Q6RW13	Type-1 angiotensin II receptor-associated protein OS=Homo sapiens GN=AGTRAP PE=1 SV=1	29.5597	3	5	3	1	159	17.408	6.14	193.77	3
Q9H0U4	Ras-related protein Rab-1B OS=Homo sapiens GN=RAB1B PE=1 SV=1	29.3532	4	4	3	1	201	22.157	5.73	97.4733	4
P11387	DNA topoisomerase 1 OS=Homo sapiens GN=TOP1 PE=1 SV=2	29.1503	19	25	19	1	765	90.669	9.31	703.657	19
P48668	Keratin, type II cytoskeletal 6C OS=Homo sapiens GN=KRT6C PE=1 SV=3	28.9007	20	27	1	1	564	59.988	8	632.992	20
P02786	Transferrin receptor protein 1 OS=Homo sapiens GN=TFRC PE=1 SV=2	28.8158	18	19	18	1	760	84.818	6.61	680.235	18
Q9UG63	ATP-binding cassette sub-family F member 2 OS=Homo sapiens GN=ABCF2 PE=1 SV=2	28.7319	15	16	15	1	623	71.245	7.37	405.769	15
P51148	Ras-related protein Rab-5C OS=Homo sapiens GN=RAB5C PE=1 SV=2	28.7037	5	5	5	1	216	23.468	8.41	178.304	5
O43660	Pleiotropic regulator 1 OS=Homo sapiens GN=PLRG1 PE=1 SV=1	28.4047	8	8	8	1	514	57.158	9.17	229.946	8
Q9NY65	Tubulin alpha-8 chain OS=Homo sapiens GN=TUBA8 PE=1 SV=1	28.2851	9	18	0	1	449	50.062	5.06	720.852	9
Q8IWS0	PHD finger protein 6 OS=Homo sapiens GN=PHF6 PE=1 SV=1	27.9452	8	9	8	1	365	41.264	8.68	252.971	8
P05387	60S acidic ribosomal protein P2 OS=Homo sapiens GN=RPLP2 PE=1 SV=1	27.8261	2	2	2	1	115	11.658	4.54	108.07	2
O94842	TOX high mobility group box family member 4 OS=Homo sapiens GN=TOX4 PE=1 SV=1	27.3752	11	14	11	1	621	66.153	5.06	562.273	11
P04259	Keratin, type II cytoskeletal 6B OS=Homo sapiens GN=KRT6B PE=1 SV=5	27.305	18	25	1	1	564	60.03	8	649.99	18
P68871	Hemoglobin subunit beta OS=Homo sapiens GN=HBB PE=1 SV=2	27.2109	4	5	4	1	147	15.988	7.28	138.66	4
Q8NCA5	Protein FAM98A OS=Homo sapiens GN=FAM98A PE=1 SV=1	26.7823	7	11	7	1	519	55.366	9.03	507.556	7
Q04695	Keratin, type I cytoskeletal 17 OS=Homo sapiens GN=KRT17 PE=1 SV=2	26.6204	12	13	5	1	432	48.076	5.02	188.881	12
Q8IVM0	Coiled-coil domain-containing protein 50 OS=Homo sapiens GN=CCDC50 PE=1 SV=1	26.4706	5	6	5	1	306	35.8	6.65	246.879	5
P61313	60S ribosomal protein L15 OS=Homo sapiens GN=RPL15 PE=1 SV=2	26.4706	6	7	6	1	204	24.131	11.62	179.191	6
Q96EV2	RNA-binding protein 33 OS=Homo sapiens GN=RBM33 PE=1 SV=3	26.3248	19	33	19	1	1170	129.906	6.93	1174.77	19
Q9UM54	Unconventional myosin-VI OS=Homo sapiens GN=MYO6 PE=1 SV=4	25.7342	25	30	25	1	1294	149.596	8.53	735.463	25
P11142	Heat shock cognate 71 kDa protein OS=Homo sapiens GN=HSPA8 PE=1 SV=1	25.5418	12	14	10	1	646	70.854	5.52	395.786	12
Q7Z2T5	TRMT1-like protein OS=Homo sapiens GN=TRMT1L PE=1 SV=2	25.2387	13	17	13	1	733	81.695	7.88	493.189	13
Q71UM5	40S ribosomal protein S27-like OS=Homo sapiens GN=RPS27L PE=1 SV=3	25	2	2	2	1	84	9.471	9.45	60.65	2
P06702	Protein S100-A9 OS=Homo sapiens GN=S100A9 PE=1 SV=1	24.5614	2	4	2	1	114	13.234	6.13	31.67	2
P12814	Alpha-actinin-1 OS=Homo sapiens GN=ACTN1 PE=1 SV=2	24.5516	17	22	9	1	892	102.993	5.41	666.814	17
Q02543	60S ribosomal protein L18a OS=Homo sapiens GN=RPL18A PE=1 SV=2	24.4318	4	4	4	1	176	20.749	10.71	106.077	4
O75533	Splicing factor 3B subunit 1 OS=Homo sapiens GN=SF3B1 PE=1 SV=3	24.3865	20	20	20	1	1304	145.738	7.09	655.07	20
P04406	Glyceraldehyde-3-phosphate dehydrogenase OS=Homo sapiens GN=GAPDH PE=1 SV=3	24.1791	5	5	5	1	335	36.03	8.46	115.24	5
Q8TEQ6	Gem-associated protein 5 OS=Homo sapiens GN=GEMIN5 PE=1 SV=3	24.1379	25	37	25	1	1508	168.483	6.62	817.064	25
P61026	Ras-related protein Rab-10 OS=Homo sapiens GN=RAB10 PE=1 SV=1	24	4	4	3	1	200	22.527	8.38	156.501	4
Q15393	Splicing factor 3B subunit 3 OS=Homo sapiens GN=SF3B3 PE=1 SV=4	23.9113	22	26	22	1	1217	135.492	5.26	962.67	22
P46783	40S ribosomal protein S10 OS=Homo sapiens GN=RPS10 PE=1 SV=1	23.6364	3	3	3	1	165	18.886	10.15	42.86	3
P06748	Nucleophosmin OS=Homo sapiens GN=NPM1 PE=1 SV=2	23.4694	5	6	5	1	294	32.555	4.78	290.836	5
Q99700	Ataxin-2 OS=Homo sapiens GN=ATXN2 PE=1 SV=2	23.3054	22	47	22	1	1313	140.196	9.57	1577.99	22
P62805	Histone H4 OS=Homo sapiens GN=HIST1H4A PE=1 SV=2	23.301	2	2	2	1	103	11.36	11.36	95.79	2
Q99613	Eukaryotic translation initiation factor 3 subunit C OS=Homo sapiens GN=EIF3C PE=1 SV=1	23.2202	14	20	14	1	913	105.278	5.68	611.684	14
Q13509	Tubulin beta-3 chain OS=Homo sapiens GN=TUBB3 PE=1 SV=2	23.1111	9	17	1	1	450	50.4	4.93	592.05	9
Q8IWX8	Calcium homeostasis endoplasmic reticulum protein OS=Homo sapiens GN=CHERP PE=1 SV=3	22.8166	13	25	13	1	916	103.637	9.04	593.475	13
Q3ZCM7	Tubulin beta-8 chain OS=Homo sapiens GN=TUBB8 PE=1 SV=2	22.7477	9	15	1	1	444	49.744	4.89	336.663	9
P81605	Dermcidin OS=Homo sapiens GN=DCD PE=1 SV=2	22.7273	3	4	3	1	110	11.277	6.54	78.43	3
Q9Y3I0	tRNA-splicing ligase RtcB homolog OS=Homo sapiens GN=RTCB PE=1 SV=1	22.5743	9	10	9	1	505	55.175	7.23	253.803	9
P63010	AP-2 complex subunit beta OS=Homo sapiens GN=AP2B1 PE=1 SV=1	22.412	16	17	10	1	937	104.486	5.38	404.844	16
Q16563	Synaptophysin-like protein 1 OS=Homo sapiens GN=SYPL1 PE=1 SV=1	22.3938	4	6	4	1	259	28.547	8.43	53.1933	4
P39023	60S ribosomal protein L3 OS=Homo sapiens GN=RPL3 PE=1 SV=2	22.3325	6	10	6	1	403	46.08	10.18	312.344	6
Q92928	Putative Ras-related protein Rab-1C OS=Homo sapiens GN=RAB1C PE=5 SV=2	21.8905	3	3	2	1	201	22.003	5.43	97.4733	3
P69905	Hemoglobin subunit alpha OS=Homo sapiens GN=HBA1 PE=1 SV=2	21.831	2	3	2	1	142	15.248	8.68	30.94	2
Q9Y383	Putative RNA-binding protein Luc7-like 2 OS=Homo sapiens GN=LUC7L2 PE=1 SV=2	21.6837	7	8	7	1	392	46.486	10.01	241.637	7
Q8WWM7	Ataxin-2-like protein OS=Homo sapiens GN=ATXN2L PE=1 SV=2	21.5814	15	19	15	1	1075	113.304	8.59	413.8	15
P68400	Casein kinase II subunit alpha OS=Homo sapiens GN=CSNK2A1 PE=1 SV=1	21.4834	6	7	6	1	391	45.115	7.74	143.594	6
B5ME19	Eukaryotic translation initiation factor 3 subunit C-like protein OS=Homo sapiens GN=EIF3CL PE=3 SV=1	21.4442	13	18	13	1	914	105.407	5.64	492.576	13
Q8NBS9	Thioredoxin domain-containing protein 5 OS=Homo sapiens GN=TXNDC5 PE=1 SV=2	21.2963	7	7	7	1	432	47.599	5.97	193.943	7
P62750	60S ribosomal protein L23a OS=Homo sapiens GN=RPL23A PE=1 SV=1	21.1538	4	4	4	1	156	17.684	10.45	82.2495	4
P02042	Hemoglobin subunit delta OS=Homo sapiens GN=HBD PE=1 SV=2	21.0884	3	4	3	1	147	16.045	8.05	106.84	3
P31944	Caspase-14 OS=Homo sapiens GN=CASP14 PE=1 SV=2	21.0744	4	4	4	1	242	27.662	5.58	57.42	4
Q9P0K7	Ankycorbin OS=Homo sapiens GN=RAI14 PE=1 SV=2	20.9184	16	17	16	1	980	109.973	6.21	416.132	16
Q08211	ATP-dependent RNA helicase A OS=Homo sapiens GN=DHX9 PE=1 SV=4	20.7874	21	22	21	1	1270	140.869	6.84	566.472	21
Q9GZN8	UPF0687 protein C20orf27 OS=Homo sapiens GN=C20orf27 PE=1 SV=3	20.6897	3	4	3	1	174	19.279	6.84	105.193	3
O43324	Eukaryotic translation elongation factor 1 epsilon-1 OS=Homo sapiens GN=EEF1E1 PE=1 SV=1	20.6897	2	2	2	1	174	19.798	8.54	104.04	2
Q04760	Lactoylglutathione lyase OS=Homo sapiens GN=GLO1 PE=1 SV=4	20.6522	1	1	1	1	184	20.764	5.31	0	1
P62917	60S ribosomal protein L8 OS=Homo sapiens GN=RPL8 PE=1 SV=2	20.6226	3	3	3	1	257	28.007	11.03	99.7433	3
Q13627	Dual specificity tyrosine-phosphorylation-regulated kinase 1A OS=Homo sapiens GN=DYRK1A PE=1 SV=2	20.5767	13	14	13	1	763	85.53	8.75	294.765	13
P23396	40S ribosomal protein S3 OS=Homo sapiens GN=RPS3 PE=1 SV=2	20.5761	4	4	4	1	243	26.671	9.66	68.48	4
Q15428	Splicing factor 3A subunit 2 OS=Homo sapiens GN=SF3A2 PE=1 SV=2	20.4741	8	12	8	1	464	49.224	9.64	294.69	8
Q9Y262	Eukaryotic translation initiation factor 3 subunit L OS=Homo sapiens GN=EIF3L PE=1 SV=1	20.2128	10	13	10	1	564	66.684	6.34	501.4	10
P21333	Filamin-A OS=Homo sapiens GN=FLNA PE=1 SV=4	20.0227	36	42	33	1	2647	280.564	6.06	1098.63	36
O60563	Cyclin-T1 OS=Homo sapiens GN=CCNT1 PE=1 SV=1	19.8347	9	12	9	1	726	80.634	8.78	354.425	9
P27824	Calnexin OS=Homo sapiens GN=CANX PE=1 SV=2	19.7635	9	11	9	1	592	67.526	4.6	327.007	9
Q9Y224	UPF0568 protein C14orf166 OS=Homo sapiens GN=C14orf166 PE=1 SV=1	19.6721	4	4	4	1	244	28.051	6.65	114.26	4
P62273	40S ribosomal protein S29 OS=Homo sapiens GN=RPS29 PE=1 SV=2	19.6429	1	1	1	1	56	6.672	10.13	31.98	1
A6NNZ2	Tubulin beta-8 chain-like protein LOC260334 OS=Homo sapiens PE=1 SV=1	19.3694	8	14	0	2	444	49.541	4.86	301.299	8
P60866	40S ribosomal protein S20 OS=Homo sapiens GN=RPS20 PE=1 SV=1	19.3277	2	2	2	1	119	13.364	9.94	67.48	2
P17812	CTP synthase 1 OS=Homo sapiens GN=CTPS1 PE=1 SV=2	19.2893	9	9	9	1	591	66.648	6.46	339.005	9
Q8NFD5	AT-rich interactive domain-containing protein 1B OS=Homo sapiens GN=ARID1B PE=1 SV=2	19.186	25	33	24	1	2236	235.974	6.73	1113.35	25
P49773	Histidine triad nucleotide-binding protein 1 OS=Homo sapiens GN=HINT1 PE=1 SV=2	19.0476	1	2	1	1	126	13.793	6.95	80.26	1
Q6UN15	Pre-mRNA 3'-end-processing factor FIP1 OS=Homo sapiens GN=FIP1L1 PE=1 SV=1	19.0236	6	7	6	1	594	66.487	5.59	140.679	6
Q14151	Scaffold attachment factor B2 OS=Homo sapiens GN=SAFB2 PE=1 SV=1	18.8877	13	14	8	1	953	107.408	6.16	332.601	13
Q9NSY1	BMP-2-inducible protein kinase OS=Homo sapiens GN=BMP2K PE=1 SV=2	18.863	13	18	13	1	1161	129.091	6.51	736.596	13
P62241	40S ribosomal protein S8 OS=Homo sapiens GN=RPS8 PE=1 SV=2	18.75	3	4	3	1	208	24.19	10.32	174.41	3
Q15427	Splicing factor 3B subunit 4 OS=Homo sapiens GN=SF3B4 PE=1 SV=1	18.3962	4	20	4	1	424	44.357	8.56	872.004	4
O43290	U4/U6.U5 tri-snRNP-associated protein 1 OS=Homo sapiens GN=SART1 PE=1 SV=1	18.375	9	10	9	1	800	90.2	6.13	497.386	9
P84098	60S ribosomal protein L19 OS=Homo sapiens GN=RPL19 PE=1 SV=1	18.3673	4	4	4	1	196	23.451	11.47	143.32	4
P0DMV9	Heat shock 70 kDa protein 1B OS=Homo sapiens GN=HSPA1B PE=1 SV=1	18.2527	8	10	7	1	641	70.009	5.66	200.486	8
Q07020	60S ribosomal protein L18 OS=Homo sapiens GN=RPL18 PE=1 SV=2	18.0851	3	3	3	1	188	21.621	11.72	165.293	3
Q07157	Tight junction protein ZO-1 OS=Homo sapiens GN=TJP1 PE=1 SV=3	17.9634	22	24	22	1	1748	195.34	6.7	529.579	22
Q8NEV1	Casein kinase II subunit alpha 3 OS=Homo sapiens GN=CSNK2A3 PE=1 SV=2	17.6471	5	6	5	1	391	45.191	8.5	131.008	5
P36578	60S ribosomal protein L4 OS=Homo sapiens GN=RPL4 PE=1 SV=5	17.5644	6	6	6	1	427	47.667	11.06	76.5438	6
Q8N1N4	Keratin, type II cytoskeletal 78 OS=Homo sapiens GN=KRT78 PE=2 SV=2	17.5	7	7	7	1	520	56.83	6.02	288.355	7
Q15637	Splicing factor 1 OS=Homo sapiens GN=SF1 PE=1 SV=4	17.0579	7	12	7	1	639	68.286	8.98	307.112	7
Q02878	60S ribosomal protein L6 OS=Homo sapiens GN=RPL6 PE=1 SV=3	17.0139	5	5	5	1	288	32.708	10.58	77.54	5
O14828	Secretory carrier-associated membrane protein 3 OS=Homo sapiens GN=SCAMP3 PE=1 SV=3	17.0029	4	10	4	1	347	38.262	7.64	420.684	4
P27708	CAD protein OS=Homo sapiens GN=CAD PE=1 SV=3	16.8539	26	29	26	1	2225	242.829	6.46	802.831	26
Q562R1	Beta-actin-like protein 2 OS=Homo sapiens GN=ACTBL2 PE=1 SV=2	16.7553	5	6	1	1	376	41.976	5.59	209.55	5
Q9UL18	Protein argonaute-1 OS=Homo sapiens GN=AGO1 PE=1 SV=3	16.6861	11	12	2	1	857	97.152	9.16	201.579	11
P19474	E3 ubiquitin-protein ligase TRIM21 OS=Homo sapiens GN=TRIM21 PE=1 SV=1	16.6316	8	8	8	1	475	54.135	6.38	198.426	8
Q9GZP4	PITH domain-containing protein 1 OS=Homo sapiens GN=PITHD1 PE=1 SV=1	16.5877	2	2	2	1	211	24.163	5.74	0	2
P05023	Sodium/potassium-transporting ATPase subunit alpha-1 OS=Homo sapiens GN=ATP1A1 PE=1 SV=1	16.52	11	11	11	1	1023	112.824	5.49	615.133	11
Q9H9G7	Protein argonaute-3 OS=Homo sapiens GN=AGO3 PE=1 SV=2	16.5116	11	12	1	1	860	97.298	9.11	215.22	11
P08621	U1 small nuclear ribonucleoprotein 70 kDa OS=Homo sapiens GN=SNRNP70 PE=1 SV=2	16.476	6	8	6	1	437	51.526	9.94	227.469	6
P68104	Elongation factor 1-alpha 1 OS=Homo sapiens GN=EEF1A1 PE=1 SV=1	16.4502	6	6	6	1	462	50.109	9.01	156.843	6
Q5VTE0	Putative elongation factor 1-alpha-like 3 OS=Homo sapiens GN=EEF1A1P5 PE=5 SV=1	16.4502	6	6	6	1	462	50.153	9.07	156.843	6
P14868	Aspartate--tRNA ligase, cytoplasmic OS=Homo sapiens GN=DARS PE=1 SV=2	15.9681	6	6	6	1	501	57.1	6.55	129.15	6
Q9Y2L9	Leucine-rich repeat and calponin homology domain-containing protein 1 OS=Homo sapiens GN=LRCH1 PE=1 SV=3	15.9341	9	10	9	1	728	80.824	5.94	358.3	9
P62491	Ras-related protein Rab-11A OS=Homo sapiens GN=RAB11A PE=1 SV=3	15.7407	3	3	3	1	216	24.378	6.57	87.94	3
O00257	E3 SUMO-protein ligase CBX4 OS=Homo sapiens GN=CBX4 PE=1 SV=3	15.7143	6	8	6	1	560	61.329	9.36	186.287	6
Q9BUF5	Tubulin beta-6 chain OS=Homo sapiens GN=TUBB6 PE=1 SV=1	15.6951	7	11	1	1	446	49.825	4.88	187.594	7
Q15907	Ras-related protein Rab-11B OS=Homo sapiens GN=RAB11B PE=1 SV=4	15.5963	3	3	3	1	218	24.473	5.94	87.94	3
O15169	Axin-1 OS=Homo sapiens GN=AXIN1 PE=1 SV=2	15.5452	8	9	8	1	862	95.576	6.96	327.495	8
P55735	Protein SEC13 homolog OS=Homo sapiens GN=SEC13 PE=1 SV=3	15.528	3	3	3	1	322	35.518	5.48	78.7167	3
Q99536	Synaptic vesicle membrane protein VAT-1 homolog OS=Homo sapiens GN=VAT1 PE=1 SV=2	15.2672	3	3	3	1	393	41.893	6.29	75.5667	3
P62166	Neuronal calcium sensor 1 OS=Homo sapiens GN=NCS1 PE=1 SV=2	15.2632	3	3	3	1	190	21.865	4.83	51.4033	3
Q8TAQ2	SWI/SNF complex subunit SMARCC2 OS=Homo sapiens GN=SMARCC2 PE=1 SV=1	15.2389	11	13	7	1	1214	132.797	5.69	453.87	11
Q9BQG0	Myb-binding protein 1A OS=Homo sapiens GN=MYBBP1A PE=1 SV=2	15.1355	14	14	14	1	1328	148.762	9.28	389.367	14
P62306	Small nuclear ribonucleoprotein F OS=Homo sapiens GN=SNRPF PE=1 SV=1	15.1163	1	1	1	1	86	9.719	4.67	45.69	1
Q16643	Drebrin OS=Homo sapiens GN=DBN1 PE=1 SV=4	15.1002	7	7	7	1	649	71.385	4.45	145.897	7
O75131	Copine-3 OS=Homo sapiens GN=CPNE3 PE=1 SV=1	15.0838	7	7	7	1	537	60.092	5.85	142.59	7
Q86YZ3	Hornerin OS=Homo sapiens GN=HRNR PE=1 SV=2	15.0526	7	10	7	1	2850	282.228	10.04	193.28	7
P31946	14-3-3 protein beta/alpha OS=Homo sapiens GN=YWHAB PE=1 SV=3	15.0407	3	3	1	1	246	28.065	4.83	75.2811	3
Q9UPW0	Forkhead box protein J3 OS=Homo sapiens GN=FOXJ3 PE=1 SV=2	14.9518	5	5	5	1	622	68.917	7.09	140.49	5
P63027	Vesicle-associated membrane protein 2 OS=Homo sapiens GN=VAMP2 PE=1 SV=3	14.6552	1	2	1	1	116	12.655	8.13	53.59	1
P22087	rRNA 2'-O-methyltransferase fibrillarin OS=Homo sapiens GN=FBL PE=1 SV=2	14.6417	4	5	4	1	321	33.763	10.18	74.1367	4
O43759	Synaptogyrin-1 OS=Homo sapiens GN=SYNGR1 PE=1 SV=2	14.5923	3	3	3	1	233	25.439	4.68	65.6033	3
O75165	DnaJ homolog subfamily C member 13 OS=Homo sapiens GN=DNAJC13 PE=1 SV=5	14.5787	26	30	26	1	2243	254.252	6.74	797.427	26
P30050	60S ribosomal protein L12 OS=Homo sapiens GN=RPL12 PE=1 SV=1	14.5455	2	2	2	1	165	17.808	9.42	71.84	2
Q13595	Transformer-2 protein homolog alpha OS=Homo sapiens GN=TRA2A PE=1 SV=1	14.539	4	4	4	1	282	32.669	11.27	95.44	4
O15126	Secretory carrier-associated membrane protein 1 OS=Homo sapiens GN=SCAMP1 PE=1 SV=2	14.497	2	3	2	1	338	37.896	7.42	119.387	2
Q9HCY8	Protein S100-A14 OS=Homo sapiens GN=S100A14 PE=1 SV=1	14.4231	1	1	1	1	104	11.655	5.24	121.82	1
P60228	Eukaryotic translation initiation factor 3 subunit E OS=Homo sapiens GN=EIF3E PE=1 SV=1	14.382	6	6	6	1	445	52.187	6.04	110.08	6
P49327	Fatty acid synthase OS=Homo sapiens GN=FASN PE=1 SV=3	14.3369	24	25	24	1	2511	273.254	6.44	695.573	24
Q7Z3C6	Autophagy-related protein 9A OS=Homo sapiens GN=ATG9A PE=1 SV=3	14.3027	7	7	7	1	839	94.387	6.67	211.321	7
O95271	Tankyrase-1 OS=Homo sapiens GN=TNKS PE=1 SV=2	14.2427	14	16	14	1	1327	141.95	7.05	369.075	14
P05386	60S acidic ribosomal protein P1 OS=Homo sapiens GN=RPLP1 PE=1 SV=1	14.0351	1	1	1	1	114	11.507	4.32	35.68	1
O75643	U5 small nuclear ribonucleoprotein 200 kDa helicase OS=Homo sapiens GN=SNRNP200 PE=1 SV=2	13.9981	22	24	22	1	2136	244.353	6.06	889.714	22
Q96BM9	ADP-ribosylation factor-like protein 8A OS=Homo sapiens GN=ARL8A PE=1 SV=1	13.9785	2	2	2	1	186	21.402	7.77	58.23	2
Q9NVJ2	ADP-ribosylation factor-like protein 8B OS=Homo sapiens GN=ARL8B PE=1 SV=1	13.9785	2	2	2	1	186	21.525	8.43	58.23	2
O14654	Insulin receptor substrate 4 OS=Homo sapiens GN=IRS4 PE=1 SV=1	13.922	11	15	11	1	1257	133.685	8.44	279.964	11
P84085	ADP-ribosylation factor 5 OS=Homo sapiens GN=ARF5 PE=1 SV=2	13.8889	2	2	1	1	180	20.517	6.79	61.45	2
P84077	ADP-ribosylation factor 1 OS=Homo sapiens GN=ARF1 PE=1 SV=2	13.8122	2	2	1	1	181	20.684	6.8	105.74	2
P61204	ADP-ribosylation factor 3 OS=Homo sapiens GN=ARF3 PE=1 SV=2	13.8122	2	2	1	1	181	20.588	7.43	105.74	2
Q14444	Caprin-1 OS=Homo sapiens GN=CAPRIN1 PE=1 SV=2	13.6812	5	5	5	1	709	78.318	5.25	163.8	5
Q13162	Peroxiredoxin-4 OS=Homo sapiens GN=PRDX4 PE=1 SV=1	13.6531	3	3	3	1	271	30.521	6.29	100.303	3
Q75N03	E3 ubiquitin-protein ligase Hakai OS=Homo sapiens GN=CBLL1 PE=1 SV=1	13.6456	5	6	5	1	491	54.484	8.29	179.363	5
Q12874	Splicing factor 3A subunit 3 OS=Homo sapiens GN=SF3A3 PE=1 SV=1	13.5729	6	6	6	1	501	58.812	5.38	193.45	6
P05089	Arginase-1 OS=Homo sapiens GN=ARG1 PE=1 SV=2	13.354	3	4	3	1	322	34.713	7.21	79.24	3
P62820	Ras-related protein Rab-1A OS=Homo sapiens GN=RAB1A PE=1 SV=3	13.1707	2	2	1	1	205	22.663	6.21	57.18	2
P02768	Serum albumin OS=Homo sapiens GN=ALB PE=1 SV=2	13.1363	9	11	9	1	609	69.321	6.28	187.543	9
Q9BZE4	Nucleolar GTP-binding protein 1 OS=Homo sapiens GN=GTPBP4 PE=1 SV=3	13.0915	6	6	6	1	634	73.918	9.5	172.18	6
P25311	Zinc-alpha-2-glycoprotein OS=Homo sapiens GN=AZGP1 PE=1 SV=2	13.0872	3	3	3	1	298	34.237	6.05	78.6867	3
P11021	78 kDa glucose-regulated protein OS=Homo sapiens GN=HSPA5 PE=1 SV=2	12.9969	6	7	4	1	654	72.288	5.16	311.959	6
P35609	Alpha-actinin-2 OS=Homo sapiens GN=ACTN2 PE=1 SV=1	12.9754	10	14	4	0	894	103.788	5.45	442.855	10
Q92572	AP-3 complex subunit sigma-1 OS=Homo sapiens GN=AP3S1 PE=1 SV=1	12.9534	2	2	2	1	193	21.718	5.39	70.6	2
Q8N684	Cleavage and polyadenylation specificity factor subunit 7 OS=Homo sapiens GN=CPSF7 PE=1 SV=1	12.9512	5	5	5	1	471	52.018	8	114.388	5
Q9UBQ0	Vacuolar protein sorting-associated protein 29 OS=Homo sapiens GN=VPS29 PE=1 SV=1	12.6374	2	2	2	1	182	20.493	6.79	78.93	2
O60232	Sjoegren syndrome/scleroderma autoantigen 1 OS=Homo sapiens GN=SSSCA1 PE=1 SV=1	12.5628	2	2	2	1	199	21.461	5.24	146.11	2
Q96KK5	Histone H2A type 1-H OS=Homo sapiens GN=HIST1H2AH PE=1 SV=3	12.5	2	3	2	1	128	13.898	10.89	55.0409	2
Q99878	Histone H2A type 1-J OS=Homo sapiens GN=HIST1H2AJ PE=1 SV=3	12.5	2	3	2	1	128	13.928	10.89	55.0409	2
Q9BTM1	Histone H2A.J OS=Homo sapiens GN=H2AFJ PE=1 SV=1	12.4031	2	3	2	1	129	14.011	10.9	55.0409	2
Q16777	Histone H2A type 2-C OS=Homo sapiens GN=HIST2H2AC PE=1 SV=4	12.4031	2	3	2	1	129	13.98	10.9	55.0409	2
Q96FJ2	Dynein light chain 2, cytoplasmic OS=Homo sapiens GN=DYNLL2 PE=1 SV=1	12.3596	1	1	1	1	89	10.343	7.37	33.35	1
Q96P63	Serpin B12 OS=Homo sapiens GN=SERPINB12 PE=1 SV=1	12.3457	4	4	4	1	405	46.247	5.53	108.59	4
Q93077	Histone H2A type 1-C OS=Homo sapiens GN=HIST1H2AC PE=1 SV=3	12.3077	2	3	2	1	130	14.097	11.05	55.0409	2
P20671	Histone H2A type 1-D OS=Homo sapiens GN=HIST1H2AD PE=1 SV=2	12.3077	2	3	2	1	130	14.099	10.9	55.0409	2
Q6FI13	Histone H2A type 2-A OS=Homo sapiens GN=HIST2H2AA3 PE=1 SV=3	12.3077	2	3	2	1	130	14.087	10.9	55.0409	2
Q7L7L0	Histone H2A type 3 OS=Homo sapiens GN=HIST3H2A PE=1 SV=3	12.3077	2	3	2	1	130	14.113	11.05	55.0409	2
P0C0S8	Histone H2A type 1 OS=Homo sapiens GN=HIST1H2AG PE=1 SV=2	12.3077	2	3	2	1	130	14.083	10.9	55.0409	2
P04908	Histone H2A type 1-B/E OS=Homo sapiens GN=HIST1H2AB PE=1 SV=2	12.3077	2	3	2	1	130	14.127	11.05	55.0409	2
P01040	Cystatin-A OS=Homo sapiens GN=CSTA PE=1 SV=1	12.2449	1	1	1	1	98	11	5.5	37.73	1
Q14157	Ubiquitin-associated protein 2-like OS=Homo sapiens GN=UBAP2L PE=1 SV=2	12.2355	8	9	8	1	1087	114.465	7.11	439.714	8
Q96QV6	Histone H2A type 1-A OS=Homo sapiens GN=HIST1H2AA PE=1 SV=3	12.2137	2	3	2	1	131	14.225	10.86	55.0409	2
Q9HCK5	Protein argonaute-4 OS=Homo sapiens GN=AGO4 PE=1 SV=2	12.1951	8	9	1	1	861	97.035	9.06	132.27	8
Q9Y2X9	Zinc finger protein 281 OS=Homo sapiens GN=ZNF281 PE=1 SV=1	12.1788	6	7	6	1	895	96.855	8.48	70.81	6
P34931	Heat shock 70 kDa protein 1-like OS=Homo sapiens GN=HSPA1L PE=1 SV=2	12.1685	5	7	3	0	641	70.331	6.02	210.623	5
Q9BWF3	RNA-binding protein 4 OS=Homo sapiens GN=RBM4 PE=1 SV=1	12.0879	2	2	2	1	364	40.289	7.08	108.86	2
Q12905	Interleukin enhancer-binding factor 2 OS=Homo sapiens GN=ILF2 PE=1 SV=2	12.0513	4	4	4	1	390	43.035	5.26	68.6033	4
P46736	Lys-63-specific deubiquitinase BRCC36 OS=Homo sapiens GN=BRCC3 PE=1 SV=2	12.0253	3	4	3	1	316	36.049	5.92	95.3333	3
P20340	Ras-related protein Rab-6A OS=Homo sapiens GN=RAB6A PE=1 SV=3	12.0192	2	2	1	1	208	23.578	5.54	73.8	2
Q12792	Twinfilin-1 OS=Homo sapiens GN=TWF1 PE=1 SV=3	12	3	3	3	1	350	40.258	6.96	81.5267	3
Q9UL25	Ras-related protein Rab-21 OS=Homo sapiens GN=RAB21 PE=1 SV=3	12	2	2	2	1	225	24.332	7.94	67.11	2
O14617	AP-3 complex subunit delta-1 OS=Homo sapiens GN=AP3D1 PE=1 SV=1	11.9688	9	10	9	1	1153	130.076	8.48	442.98	9
P14923	Junction plakoglobin OS=Homo sapiens GN=JUP PE=1 SV=3	11.9463	6	8	6	1	745	81.693	6.14	245.788	6
Q93008	Probable ubiquitin carboxyl-terminal hydrolase FAF-X OS=Homo sapiens GN=USP9X PE=1 SV=3	11.9455	24	27	24	1	2570	292.094	5.8	620.453	24
Q69YQ0	Cytospin-A OS=Homo sapiens GN=SPECC1L PE=1 SV=2	11.9069	10	11	10	1	1117	124.525	5.72	348.246	10
A6NHL2	Tubulin alpha chain-like 3 OS=Homo sapiens GN=TUBAL3 PE=1 SV=2	11.8834	5	6	2	1	446	49.877	6.05	243.133	5
Q93050	V-type proton ATPase 116 kDa subunit a isoform 1 OS=Homo sapiens GN=ATP6V0A1 PE=1 SV=3	11.828	8	8	8	1	837	96.35	6.43	184.483	8
P05109	Protein S100-A8 OS=Homo sapiens GN=S100A8 PE=1 SV=1	11.828	1	1	1	1	93	10.828	7.03	57.85	1
P51809	Vesicle-associated membrane protein 7 OS=Homo sapiens GN=VAMP7 PE=1 SV=3	11.8182	3	3	3	1	220	24.919	8.6	53.7533	3
Q6P2Q9	Pre-mRNA-processing-splicing factor 8 OS=Homo sapiens GN=PRPF8 PE=1 SV=2	11.7345	21	22	21	1	2335	273.427	8.84	428.163	21
P27449	V-type proton ATPase 16 kDa proteolipid subunit OS=Homo sapiens GN=ATP6V0C PE=1 SV=1	11.6129	1	2	1	1	155	15.725	8.44	56.48	1
P08727	Keratin, type I cytoskeletal 19 OS=Homo sapiens GN=KRT19 PE=1 SV=4	11.5	6	6	2	1	400	44.079	5.14	138.05	6
P09874	Poly [ADP-ribose] polymerase 1 OS=Homo sapiens GN=PARP1 PE=1 SV=4	11.4398	8	8	8	1	1014	113.012	8.88	125.251	8
P26373	60S ribosomal protein L13 OS=Homo sapiens GN=RPL13 PE=1 SV=4	11.3744	2	2	2	1	211	24.247	11.65	98.86	2
P16104	Histone H2AX OS=Homo sapiens GN=H2AFX PE=1 SV=2	11.1888	2	3	2	1	143	15.135	10.74	55.0409	2
P31151	Protein S100-A7 OS=Homo sapiens GN=S100A7 PE=1 SV=4	10.8911	1	1	1	1	101	11.464	6.77	22.82	1
Q86SG5	Protein S100-A7A OS=Homo sapiens GN=S100A7A PE=1 SV=3	10.8911	1	1	1	1	101	11.298	7.44	22.82	1
Q8IXB1	DnaJ homolog subfamily C member 10 OS=Homo sapiens GN=DNAJC10 PE=1 SV=2	10.8449	7	7	7	1	793	91.021	7.18	193.766	7
Q9H853	Putative tubulin-like protein alpha-4B OS=Homo sapiens GN=TUBA4B PE=5 SV=2	10.7884	2	5	0	2	241	27.534	7.83	239.27	2
P62244	40S ribosomal protein S15a OS=Homo sapiens GN=RPS15A PE=1 SV=2	10.7692	1	1	1	1	130	14.83	10.13	57.29	1
P26641	Elongation factor 1-gamma OS=Homo sapiens GN=EEF1G PE=1 SV=3	10.7551	4	5	4	1	437	50.087	6.67	120.274	4
P19012	Keratin, type I cytoskeletal 15 OS=Homo sapiens GN=KRT15 PE=1 SV=3	10.7456	6	8	0	2	456	49.181	4.77	172.524	6
Q9BYX7	Putative beta-actin-like protein 3 OS=Homo sapiens GN=POTEKP PE=5 SV=1	10.6667	3	6	0	2	375	41.989	6.33	338.343	3
Q9Y580	RNA-binding protein 7 OS=Homo sapiens GN=RBM7 PE=1 SV=1	10.5263	2	2	2	1	266	30.485	9.57	40.75	2
Q8WVC0	RNA polymerase-associated protein LEO1 OS=Homo sapiens GN=LEO1 PE=1 SV=1	10.5105	6	7	6	1	666	75.359	4.51	220.283	6
P31943	Heterogeneous nuclear ribonucleoprotein H OS=Homo sapiens GN=HNRNPH1 PE=1 SV=4	10.4677	3	3	3	1	449	49.198	6.3	180.517	3
O00488	Zinc finger protein 593 OS=Homo sapiens GN=ZNF593 PE=1 SV=2	10.4478	1	1	1	1	134	15.19	9.82	49.39	1
Q9H5H4	Zinc finger protein 768 OS=Homo sapiens GN=ZNF768 PE=1 SV=2	10.3704	5	5	5	1	540	60.191	7.97	164.96	5
P27635	60S ribosomal protein L10 OS=Homo sapiens GN=RPL10 PE=1 SV=4	10.2804	2	2	2	1	214	24.588	10.08	90.8	2
Q15424	Scaffold attachment factor B1 OS=Homo sapiens GN=SAFB PE=1 SV=4	10.2732	7	8	2	1	915	102.58	5.47	207.861	7
P61020	Ras-related protein Rab-5B OS=Homo sapiens GN=RAB5B PE=1 SV=1	10.2326	2	2	2	1	215	23.692	8.13	56.5492	2
P20339	Ras-related protein Rab-5A OS=Homo sapiens GN=RAB5A PE=1 SV=2	10.2326	2	2	2	1	215	23.644	8.15	56.5492	2
P51572	B-cell receptor-associated protein 31 OS=Homo sapiens GN=BCAP31 PE=1 SV=3	10.1626	2	2	2	1	246	27.974	8.44	50.8	2
Q09161	Nuclear cap-binding protein subunit 1 OS=Homo sapiens GN=NCBP1 PE=1 SV=1	10.1266	6	6	6	1	790	91.781	6.43	201.853	6
Q9P2N5	RNA-binding protein 27 OS=Homo sapiens GN=RBM27 PE=1 SV=2	10.0943	8	13	7	1	1060	118.645	9.19	194.25	8
P48741	Putative heat shock 70 kDa protein 7 OS=Homo sapiens GN=HSPA7 PE=5 SV=2	10.0817	3	4	2	1	367	40.22	7.87	117.28	3
Q92922	SWI/SNF complex subunit SMARCC1 OS=Homo sapiens GN=SMARCC1 PE=1 SV=3	10.0452	9	10	5	1	1105	122.79	5.76	258.892	9
P63173	60S ribosomal protein L38 OS=Homo sapiens GN=RPL38 PE=1 SV=2	10	1	1	1	1	70	8.213	10.1	0	1
O15431	High affinity copper uptake protein 1 OS=Homo sapiens GN=SLC31A1 PE=1 SV=1	10	1	1	1	1	190	21.076	7.42	0	1
Q6KB66	Keratin, type II cytoskeletal 80 OS=Homo sapiens GN=KRT80 PE=1 SV=2	9.95575	4	4	3	1	452	50.494	5.67	133.79	4
P62277	40S ribosomal protein S13 OS=Homo sapiens GN=RPS13 PE=1 SV=2	9.93377	1	1	1	1	151	17.212	10.54	0	1
O75379	Vesicle-associated membrane protein 4 OS=Homo sapiens GN=VAMP4 PE=1 SV=2	9.92908	1	1	1	1	141	16.387	7.34	78.16	1
O75400	Pre-mRNA-processing factor 40 homolog A OS=Homo sapiens GN=PRPF40A PE=1 SV=2	9.92685	8	9	8	1	957	108.737	7.56	196.843	8
O95214	Leptin receptor overlapping transcript-like 1 OS=Homo sapiens GN=LEPROTL1 PE=2 SV=2	9.92366	1	1	1	1	131	14.419	5.9	92.81	1
O15243	Leptin receptor gene-related protein OS=Homo sapiens GN=LEPROT PE=2 SV=1	9.92366	1	1	1	1	131	14.244	6.51	72.96	1
P62701	40S ribosomal protein S4, X isoform OS=Homo sapiens GN=RPS4X PE=1 SV=2	9.88593	3	3	3	1	263	29.579	10.15	57.69	3
Q09028	Histone-binding protein RBBP4 OS=Homo sapiens GN=RBBP4 PE=1 SV=3	9.88235	3	4	1	1	425	47.626	4.89	77.1	3
O14980	Exportin-1 OS=Homo sapiens GN=XPO1 PE=1 SV=1	9.80392	8	8	8	1	1071	123.306	6.06	146.51	8
P46781	40S ribosomal protein S9 OS=Homo sapiens GN=RPS9 PE=1 SV=3	9.79381	2	2	2	1	194	22.578	10.65	30.38	2
O15127	Secretory carrier-associated membrane protein 2 OS=Homo sapiens GN=SCAMP2 PE=1 SV=2	9.72644	2	4	2	1	329	36.625	6.1	160.757	2
P17066	Heat shock 70 kDa protein 6 OS=Homo sapiens GN=HSPA6 PE=1 SV=2	9.6423	5	6	4	0	643	70.984	6.14	154.647	5
Q10567	AP-1 complex subunit beta-1 OS=Homo sapiens GN=AP1B1 PE=1 SV=2	9.48367	7	8	1	1	949	104.57	5.06	137.95	7
O95292	Vesicle-associated membrane protein-associated protein B/C OS=Homo sapiens GN=VAPB PE=1 SV=3	9.46502	2	2	1	0	243	27.211	7.3	37.85	2
P47914	60S ribosomal protein L29 OS=Homo sapiens GN=RPL29 PE=1 SV=2	9.43396	1	1	1	1	159	17.741	11.66	39.98	1
Q8N7H5	RNA polymerase II-associated factor 1 homolog OS=Homo sapiens GN=PAF1 PE=1 SV=2	9.4162	4	4	4	1	531	59.939	4.63	108.78	4
O95678	Keratin, type II cytoskeletal 75 OS=Homo sapiens GN=KRT75 PE=1 SV=2	9.2559	6	8	0	2	551	59.524	7.74	245.899	6
Q9P0L0	Vesicle-associated membrane protein-associated protein A OS=Homo sapiens GN=VAPA PE=1 SV=3	9.23695	2	2	2	1	249	27.875	8.62	37.85	2
P13637	Sodium/potassium-transporting ATPase subunit alpha-3 OS=Homo sapiens GN=ATP1A3 PE=1 SV=3	9.18065	5	5	5	1	1013	111.677	5.38	328.14	5
Q92930	Ras-related protein Rab-8B OS=Homo sapiens GN=RAB8B PE=1 SV=2	9.17874	2	2	1	1	207	23.569	9.07	43.59	2
P61006	Ras-related protein Rab-8A OS=Homo sapiens GN=RAB8A PE=1 SV=1	9.17874	2	2	1	1	207	23.653	9.07	43.59	2
P13646	Keratin, type I cytoskeletal 13 OS=Homo sapiens GN=KRT13 PE=1 SV=4	9.17031	6	17	2	0	458	49.557	4.96	416.527	6
P49755	Transmembrane emp24 domain-containing protein 10 OS=Homo sapiens GN=TMED10 PE=1 SV=2	9.13242	2	2	2	1	219	24.96	7.44	98.77	2
P50993	Sodium/potassium-transporting ATPase subunit alpha-2 OS=Homo sapiens GN=ATP1A2 PE=1 SV=1	9.11765	5	5	5	1	1020	112.193	5.66	328.14	5
P35573	Glycogen debranching enzyme OS=Homo sapiens GN=AGL PE=1 SV=3	9.07311	10	10	10	1	1532	174.652	6.76	207.077	10
O75223	Gamma-glutamylcyclotransferase OS=Homo sapiens GN=GGCT PE=1 SV=1	9.04255	1	1	1	1	188	20.994	5.14	0	1
Q15366	Poly(rC)-binding protein 2 OS=Homo sapiens GN=PCBP2 PE=1 SV=1	9.0411	2	2	2	1	365	38.556	6.79	76.32	2
Q13523	Serine/threonine-protein kinase PRP4 homolog OS=Homo sapiens GN=PRPF4B PE=1 SV=3	9.03674	9	10	9	1	1007	116.916	10.26	288.923	9
O43760	Synaptogyrin-2 OS=Homo sapiens GN=SYNGR2 PE=1 SV=1	8.92857	2	2	2	1	224	24.794	4.94	52.26	2
Q9NZT1	Calmodulin-like protein 5 OS=Homo sapiens GN=CALML5 PE=1 SV=2	8.90411	1	1	1	1	146	15.883	4.44	38.09	1
P60953	Cell division control protein 42 homolog OS=Homo sapiens GN=CDC42 PE=1 SV=2	8.90052	1	1	1	1	191	21.245	6.55	25.22	1
Q99805	Transmembrane 9 superfamily member 2 OS=Homo sapiens GN=TM9SF2 PE=1 SV=1	8.89894	4	4	4	1	663	75.725	7.44	89.46	4
Q9NQ29	Putative RNA-binding protein Luc7-like 1 OS=Homo sapiens GN=LUC7L PE=1 SV=1	8.89488	3	3	2	0	371	43.701	9.92	78.5033	3
P35613	Basigin OS=Homo sapiens GN=BSG PE=1 SV=2	8.83117	2	2	2	1	385	42.174	5.66	75.0968	2
O43670	BUB3-interacting and GLEBS motif-containing protein ZNF207 OS=Homo sapiens GN=ZNF207 PE=1 SV=1	8.78661	3	4	3	1	478	50.717	9.1	138.22	3
Q9BU76	Multiple myeloma tumor-associated protein 2 OS=Homo sapiens GN=MMTAG2 PE=1 SV=1	8.74525	2	2	2	1	263	29.394	10.02	87.8339	2
Q969E2	Secretory carrier-associated membrane protein 4 OS=Homo sapiens GN=SCAMP4 PE=1 SV=1	8.73362	2	2	2	1	229	25.711	8.82	35.36	2
O95716	Ras-related protein Rab-3D OS=Homo sapiens GN=RAB3D PE=1 SV=1	8.6758	2	2	1	1	219	24.252	4.93	43.59	2
P20337	Ras-related protein Rab-3B OS=Homo sapiens GN=RAB3B PE=1 SV=2	8.6758	2	2	1	1	219	24.742	5.02	43.59	2
Q6PKG0	La-related protein 1 OS=Homo sapiens GN=LARP1 PE=1 SV=2	8.66788	7	8	7	1	1096	123.434	8.82	211.18	7
P53999	Activated RNA polymerase II transcriptional coactivator p15 OS=Homo sapiens GN=SUB1 PE=1 SV=3	8.66142	1	1	1	1	127	14.386	9.6	61.29	1
P51608	Methyl-CpG-binding protein 2 OS=Homo sapiens GN=MECP2 PE=1 SV=1	8.64198	3	3	3	1	486	52.409	9.95	67.4067	3
Q05639	Elongation factor 1-alpha 2 OS=Homo sapiens GN=EEF1A2 PE=1 SV=1	8.63931	4	4	4	1	463	50.438	9.03	102.42	4
P20336	Ras-related protein Rab-3A OS=Homo sapiens GN=RAB3A PE=1 SV=1	8.63636	2	2	1	1	220	24.968	5.03	43.59	2
Q9NW07	Zinc finger protein 358 OS=Homo sapiens GN=ZNF358 PE=1 SV=2	8.62676	3	4	3	1	568	59.25	6.6	124.95	3
Q9NQ39	Putative 40S ribosomal protein S10-like OS=Homo sapiens GN=RPS10P5 PE=5 SV=1	8.52273	1	1	1	1	176	20.108	10.13	16.37	1
Q9BQ67	Glutamate-rich WD repeat-containing protein 1 OS=Homo sapiens GN=GRWD1 PE=1 SV=1	8.52018	2	2	2	1	446	49.388	4.92	49.74	2
P60033	CD81 antigen OS=Homo sapiens GN=CD81 PE=1 SV=1	8.47458	1	2	1	1	236	25.792	5.29	123.39	1
Q9BSJ8	Extended synaptotagmin-1 OS=Homo sapiens GN=ESYT1 PE=1 SV=1	8.42391	7	8	7	1	1104	122.78	5.83	251.174	7
O94973	AP-2 complex subunit alpha-2 OS=Homo sapiens GN=AP2A2 PE=1 SV=2	8.41321	5	5	4	1	939	103.895	6.96	68.7521	5
P08195	4F2 cell-surface antigen heavy chain OS=Homo sapiens GN=SLC3A2 PE=1 SV=3	8.4127	4	4	4	1	630	67.952	5.01	62.6685	4
Q96E17	Ras-related protein Rab-3C OS=Homo sapiens GN=RAB3C PE=2 SV=1	8.37004	2	2	1	1	227	25.936	5.24	43.59	2
P08670	Vimentin OS=Homo sapiens GN=VIM PE=1 SV=4	8.3691	4	4	4	1	466	53.619	5.12	72.3025	4
P18085	ADP-ribosylation factor 4 OS=Homo sapiens GN=ARF4 PE=1 SV=3	8.33333	2	2	2	1	180	20.498	7.14	51.5159	2
P52657	Transcription initiation factor IIA subunit 2 OS=Homo sapiens GN=GTF2A2 PE=1 SV=1	8.25688	1	1	1	1	109	12.449	6.62	15.54	1
O43169	Cytochrome b5 type B OS=Homo sapiens GN=CYB5B PE=1 SV=2	8.21918	1	1	1	1	146	16.322	4.97	42.13	1
P62249	40S ribosomal protein S16 OS=Homo sapiens GN=RPS16 PE=1 SV=2	8.21918	1	1	1	1	146	16.435	10.21	0	1
P54652	Heat shock-related 70 kDa protein 2 OS=Homo sapiens GN=HSPA2 PE=1 SV=1	8.13772	4	6	2	1	639	69.978	5.74	217.203	4
P12035	Keratin, type II cytoskeletal 3 OS=Homo sapiens GN=KRT3 PE=1 SV=3	8.12102	7	9	2	0	628	64.378	6.48	206.019	7
Q08043	Alpha-actinin-3 OS=Homo sapiens GN=ACTN3 PE=1 SV=2	8.10211	7	7	1	0	901	103.176	5.52	183.94	7
Q13547	Histone deacetylase 1 OS=Homo sapiens GN=HDAC1 PE=1 SV=1	8.09129	3	3	2	1	482	55.068	5.48	79.7833	3
Q8IY67	Ribonucleoprotein PTB-binding 1 OS=Homo sapiens GN=RAVER1 PE=1 SV=1	8.08581	2	2	2	1	606	63.837	8.48	82.72	2
P05787	Keratin, type II cytoskeletal 8 OS=Homo sapiens GN=KRT8 PE=1 SV=7	8.07453	5	7	0	0	483	53.671	5.59	186.66	5
Q13555	Calcium/calmodulin-dependent protein kinase type II subunit gamma OS=Homo sapiens GN=CAMK2G PE=1 SV=3	8.06452	4	4	2	1	558	62.57	7.83	115.923	4
Q8NHP8	Putative phospholipase B-like 2 OS=Homo sapiens GN=PLBD2 PE=1 SV=2	7.97963	4	4	4	1	589	65.43	6.8	64.77	4
Q13283	Ras GTPase-activating protein-binding protein 1 OS=Homo sapiens GN=G3BP1 PE=1 SV=1	7.93991	2	2	2	1	466	52.132	5.52	31.28	2
Q96QK1	Vacuolar protein sorting-associated protein 35 OS=Homo sapiens GN=VPS35 PE=1 SV=2	7.91457	5	5	5	1	796	91.649	5.49	201.64	5
Q8NC51	Plasminogen activator inhibitor 1 RNA-binding protein OS=Homo sapiens GN=SERBP1 PE=1 SV=2	7.84314	2	2	2	1	408	44.938	8.65	87.3	2
P49257	Protein ERGIC-53 OS=Homo sapiens GN=LMAN1 PE=1 SV=2	7.84314	3	3	3	1	510	57.513	6.77	49.58	3
Q6S8J3	POTE ankyrin domain family member E OS=Homo sapiens GN=POTEE PE=2 SV=3	7.81395	6	16	0	2	1075	121.286	6.2	845.87	6
Q9BXF6	Rab11 family-interacting protein 5 OS=Homo sapiens GN=RAB11FIP5 PE=1 SV=1	7.81011	3	3	3	1	653	70.372	9.23	160.637	3
Q96N67	Dedicator of cytokinesis protein 7 OS=Homo sapiens GN=DOCK7 PE=1 SV=4	7.71028	11	11	11	1	2140	242.407	6.8	307.733	11
Q7L2J0	7SK snRNA methylphosphate capping enzyme OS=Homo sapiens GN=MEPCE PE=1 SV=1	7.69231	5	5	5	1	689	74.31	9.57	57.3	5
Q5XKE5	Keratin, type II cytoskeletal 79 OS=Homo sapiens GN=KRT79 PE=1 SV=2	7.66355	5	8	1	1	535	57.8	7.2	235.311	5
O15020	Spectrin beta chain, non-erythrocytic 2 OS=Homo sapiens GN=SPTBN2 PE=1 SV=3	7.61506	13	18	8	1	2390	271.157	6.11	481.579	13
P35637	RNA-binding protein FUS OS=Homo sapiens GN=FUS PE=1 SV=1	7.60456	3	4	3	1	526	53.394	9.36	92.6367	3
P25398	40S ribosomal protein S12 OS=Homo sapiens GN=RPS12 PE=1 SV=3	7.57576	1	1	1	1	132	14.505	7.21	33.74	1
P09234	U1 small nuclear ribonucleoprotein C OS=Homo sapiens GN=SNRPC PE=1 SV=1	7.54717	1	1	1	1	159	17.381	9.67	62.19	1
Q9P0U3	Sentrin-specific protease 1 OS=Homo sapiens GN=SENP1 PE=1 SV=2	7.45342	3	3	3	1	644	73.435	8.47	81.07	3
P06312	Immunoglobulin kappa variable 4-1 OS=Homo sapiens GN=IGKV4-1 PE=1 SV=1	7.43802	1	1	1	1	121	13.372	5.25	35.25	1
Q92908	Transcription factor GATA-6 OS=Homo sapiens GN=GATA6 PE=1 SV=2	7.39496	2	3	2	1	595	59.995	8.35	266.42	2
P55795	Heterogeneous nuclear ribonucleoprotein H2 OS=Homo sapiens GN=HNRNPH2 PE=1 SV=1	7.34967	2	2	2	1	449	49.232	6.3	126.31	2
P27348	14-3-3 protein theta OS=Homo sapiens GN=YWHAQ PE=1 SV=1	7.34694	2	2	0	3	245	27.747	4.78	52.3383	2
Q04917	14-3-3 protein eta OS=Homo sapiens GN=YWHAH PE=1 SV=4	7.31707	2	2	0	3	246	28.201	4.84	52.3383	2
P61981	14-3-3 protein gamma OS=Homo sapiens GN=YWHAG PE=1 SV=2	7.28745	2	2	0	3	247	28.285	4.89	52.3383	2
O60885	Bromodomain-containing protein 4 OS=Homo sapiens GN=BRD4 PE=1 SV=2	7.26872	8	8	8	1	1362	152.124	9.19	144.61	8
P31947	14-3-3 protein sigma OS=Homo sapiens GN=SFN PE=1 SV=1	7.25806	2	2	0	3	248	27.757	4.74	52.3383	2
P18124	60S ribosomal protein L7 OS=Homo sapiens GN=RPL7 PE=1 SV=1	7.25806	2	2	2	1	248	29.207	10.65	32.57	2
Q9UEG4	Zinc finger protein 629 OS=Homo sapiens GN=ZNF629 PE=1 SV=2	7.24971	5	5	5	1	869	96.559	7.93	98.53	5
P26196	Probable ATP-dependent RNA helicase DDX6 OS=Homo sapiens GN=DDX6 PE=1 SV=2	7.24638	2	4	2	1	483	54.382	8.66	47.49	2
P49736	DNA replication licensing factor MCM2 OS=Homo sapiens GN=MCM2 PE=1 SV=4	7.19027	5	5	5	1	904	101.832	5.52	114.63	5
P07195	L-lactate dehydrogenase B chain OS=Homo sapiens GN=LDHB PE=1 SV=2	7.18563	2	2	2	1	334	36.615	6.05	67.93	2
Q99879	Histone H2B type 1-M OS=Homo sapiens GN=HIST1H2BM PE=1 SV=3	7.14286	1	1	1	1	126	13.981	10.32	33.75	1
P06899	Histone H2B type 1-J OS=Homo sapiens GN=HIST1H2BJ PE=1 SV=3	7.14286	1	1	1	1	126	13.896	10.32	33.75	1
Q99880	Histone H2B type 1-L OS=Homo sapiens GN=HIST1H2BL PE=1 SV=3	7.14286	1	1	1	1	126	13.944	10.32	33.75	1
P62807	Histone H2B type 1-C/E/F/G/I OS=Homo sapiens GN=HIST1H2BC PE=1 SV=4	7.14286	1	1	1	1	126	13.898	10.32	33.75	1
P58876	Histone H2B type 1-D OS=Homo sapiens GN=HIST1H2BD PE=1 SV=2	7.14286	1	1	1	1	126	13.928	10.32	33.75	1
P23527	Histone H2B type 1-O OS=Homo sapiens GN=HIST1H2BO PE=1 SV=3	7.14286	1	1	1	1	126	13.898	10.32	33.75	1
Q16778	Histone H2B type 2-E OS=Homo sapiens GN=HIST2H2BE PE=1 SV=3	7.14286	1	1	1	1	126	13.912	10.32	33.75	1
Q99877	Histone H2B type 1-N OS=Homo sapiens GN=HIST1H2BN PE=1 SV=3	7.14286	1	1	1	1	126	13.914	10.32	33.75	1
P57053	Histone H2B type F-S OS=Homo sapiens GN=H2BFS PE=1 SV=2	7.14286	1	1	1	1	126	13.936	10.37	33.75	1
P33778	Histone H2B type 1-B OS=Homo sapiens GN=HIST1H2BB PE=1 SV=2	7.14286	1	1	1	1	126	13.942	10.32	33.75	1
O60814	Histone H2B type 1-K OS=Homo sapiens GN=HIST1H2BK PE=1 SV=3	7.14286	1	1	1	1	126	13.882	10.32	33.75	1
Q93079	Histone H2B type 1-H OS=Homo sapiens GN=HIST1H2BH PE=1 SV=3	7.14286	1	1	1	1	126	13.884	10.32	33.75	1
Q8N257	Histone H2B type 3-B OS=Homo sapiens GN=HIST3H2BB PE=1 SV=3	7.14286	1	1	1	1	126	13.9	10.32	33.75	1
Q5QNW6	Histone H2B type 2-F OS=Homo sapiens GN=HIST2H2BF PE=1 SV=3	7.14286	1	1	1	1	126	13.912	10.32	33.75	1
P62318	Small nuclear ribonucleoprotein Sm D3 OS=Homo sapiens GN=SNRPD3 PE=1 SV=1	7.14286	1	1	1	1	126	13.907	10.32	21.58	1
Q7Z794	Keratin, type II cytoskeletal 1b OS=Homo sapiens GN=KRT77 PE=2 SV=3	7.09343	5	10	2	1	578	61.864	5.99	190.491	5
Q96A08	Histone H2B type 1-A OS=Homo sapiens GN=HIST1H2BA PE=1 SV=3	7.08661	1	1	1	1	127	14.159	10.32	33.75	1
A6NMY6	Putative annexin A2-like protein OS=Homo sapiens GN=ANXA2P2 PE=5 SV=2	7.07965	2	2	2	1	339	38.635	6.95	47.77	2
P07355	Annexin A2 OS=Homo sapiens GN=ANXA2 PE=1 SV=2	7.07965	2	2	2	1	339	38.58	7.75	47.77	2
P61019	Ras-related protein Rab-2A OS=Homo sapiens GN=RAB2A PE=1 SV=1	7.07547	1	2	1	1	212	23.531	6.54	36.74	1
Q96HR9	Receptor expression-enhancing protein 6 OS=Homo sapiens GN=REEP6 PE=1 SV=1	7.06522	1	1	1	1	184	20.72	8.56	43.91	1
Q16531	DNA damage-binding protein 1 OS=Homo sapiens GN=DDB1 PE=1 SV=1	7.01754	6	6	6	1	1140	126.887	5.26	127.953	6
Q6PD62	RNA polymerase-associated protein CTR9 homolog OS=Homo sapiens GN=CTR9 PE=1 SV=1	6.99062	6	6	6	1	1173	133.42	6.77	122.24	6
P31942	Heterogeneous nuclear ribonucleoprotein H3 OS=Homo sapiens GN=HNRNPH3 PE=1 SV=2	6.93642	2	3	2	1	346	36.903	6.87	86.3389	2
P19013	Keratin, type II cytoskeletal 4 OS=Homo sapiens GN=KRT4 PE=1 SV=4	6.92884	4	5	1	0	534	57.25	6.61	129.06	4
Q8IUE6	Histone H2A type 2-B OS=Homo sapiens GN=HIST2H2AB PE=1 SV=3	6.92308	1	2	1	1	130	13.987	10.89	33.76	1
P46778	60S ribosomal protein L21 OS=Homo sapiens GN=RPL21 PE=1 SV=2	6.875	1	1	1	1	160	18.553	10.49	29.31	1
Q14974	Importin subunit beta-1 OS=Homo sapiens GN=KPNB1 PE=1 SV=2	6.84932	5	6	5	1	876	97.108	4.78	175.92	5
P69892	Hemoglobin subunit gamma-2 OS=Homo sapiens GN=HBG2 PE=1 SV=2	6.80272	1	1	1	1	147	16.116	7.2	18.23	1
P02100	Hemoglobin subunit epsilon OS=Homo sapiens GN=HBE1 PE=1 SV=2	6.80272	1	1	1	1	147	16.192	8.63	18.23	1
P69891	Hemoglobin subunit gamma-1 OS=Homo sapiens GN=HBG1 PE=1 SV=2	6.80272	1	1	1	1	147	16.13	7.2	18.23	1
Q9HAH7	Probable fibrosin-1 OS=Homo sapiens GN=FBRS PE=1 SV=3	6.73913	3	3	3	1	460	48.358	9.95	45.33	3
P08579	U2 small nuclear ribonucleoprotein B'' OS=Homo sapiens GN=SNRPB2 PE=1 SV=1	6.66667	2	2	2	1	225	25.47	9.72	57.56	2
Q8N163	Cell cycle and apoptosis regulator protein 2 OS=Homo sapiens GN=CCAR2 PE=1 SV=2	6.60888	3	4	3	1	923	102.838	5.22	76.7067	3
Q9UMS4	Pre-mRNA-processing factor 19 OS=Homo sapiens GN=PRPF19 PE=1 SV=1	6.54762	3	3	3	1	504	55.146	6.61	49.03	3
Q5T4S7	E3 ubiquitin-protein ligase UBR4 OS=Homo sapiens GN=UBR4 PE=1 SV=1	6.2705	22	22	22	1	5183	573.476	6.04	527.838	22
Q13557	Calcium/calmodulin-dependent protein kinase type II subunit delta OS=Homo sapiens GN=CAMK2D PE=1 SV=3	6.21242	3	3	1	1	499	56.334	7.25	41.46	3
P39019	40S ribosomal protein S19 OS=Homo sapiens GN=RPS19 PE=1 SV=2	6.2069	1	1	1	1	145	16.051	10.32	40.05	1
P41252	Isoleucine--tRNA ligase, cytoplasmic OS=Homo sapiens GN=IARS PE=1 SV=2	6.18067	6	6	6	1	1262	144.406	6.15	84.7079	6
P02545	Prelamin-A/C OS=Homo sapiens GN=LMNA PE=1 SV=1	6.1747	4	4	4	1	664	74.095	7.02	141.05	4
Q6P1X5	Transcription initiation factor TFIID subunit 2 OS=Homo sapiens GN=TAF2 PE=1 SV=3	6.17181	5	5	5	1	1199	136.883	8.19	41.7	5
O00410	Importin-5 OS=Homo sapiens GN=IPO5 PE=1 SV=4	6.10757	4	4	4	1	1097	123.55	4.94	148.67	4
Q14192	Four and a half LIM domains protein 2 OS=Homo sapiens GN=FHL2 PE=1 SV=3	6.09319	1	1	1	1	279	32.171	7.55	76.67	1
P04183	Thymidine kinase, cytosolic OS=Homo sapiens GN=TK1 PE=1 SV=2	5.98291	1	2	1	1	234	25.452	8.51	14.91	1
Q01546	Keratin, type II cytoskeletal 2 oral OS=Homo sapiens GN=KRT76 PE=1 SV=2	5.95611	5	7	1	1	638	65.8	8.12	160.78	5
Q9BU79	Transmembrane protein 243 OS=Homo sapiens GN=TMEM243 PE=1 SV=1	5.9322	1	1	1	1	118	13.382	8.18	28.7	1
Q9UPT9	Ubiquitin carboxyl-terminal hydrolase 22 OS=Homo sapiens GN=USP22 PE=1 SV=2	5.90476	2	2	2	1	525	59.921	8.05	23.03	2
Q16576	Histone-binding protein RBBP7 OS=Homo sapiens GN=RBBP7 PE=1 SV=1	5.88235	3	3	1	1	425	47.79	5.05	84.1433	3
P47929	Galectin-7 OS=Homo sapiens GN=LGALS7 PE=1 SV=2	5.88235	1	1	1	1	136	15.066	7.62	0	1
Q08554	Desmocollin-1 OS=Homo sapiens GN=DSC1 PE=1 SV=2	5.81655	4	5	4	1	894	99.924	5.43	161.763	4
Q02413	Desmoglein-1 OS=Homo sapiens GN=DSG1 PE=1 SV=2	5.81506	4	6	4	1	1049	113.676	5.03	212.898	4
P53675	Clathrin heavy chain 2 OS=Homo sapiens GN=CLTCL1 PE=1 SV=2	5.79268	8	10	8	1	1640	186.91	5.85	349.024	8
O75340	Programmed cell death protein 6 OS=Homo sapiens GN=PDCD6 PE=1 SV=1	5.75916	1	1	1	1	191	21.855	5.4	44.93	1
O15400	Syntaxin-7 OS=Homo sapiens GN=STX7 PE=1 SV=4	5.74713	1	1	1	1	261	29.797	5.55	49.22	1
P04844	Dolichyl-diphosphooligosaccharide--protein glycosyltransferase subunit 2 OS=Homo sapiens GN=RPN2 PE=1 SV=3	5.70523	2	2	2	1	631	69.241	5.69	61.19	2
A5A3E0	POTE ankyrin domain family member F OS=Homo sapiens GN=POTEF PE=1 SV=2	5.67442	5	8	0	2	1075	121.367	6.2	372.85	5
P16403	Histone H1.2 OS=Homo sapiens GN=HIST1H1C PE=1 SV=2	5.6338	1	1	1	1	213	21.352	10.93	0	1
Q15365	Poly(rC)-binding protein 1 OS=Homo sapiens GN=PCBP1 PE=1 SV=2	5.61798	1	1	1	1	356	37.474	7.09	67.59	1
Q7Z3Y7	Keratin, type I cytoskeletal 28 OS=Homo sapiens GN=KRT28 PE=1 SV=2	5.60345	4	13	2	1	464	50.536	5.47	265.773	4
Q92973	Transportin-1 OS=Homo sapiens GN=TNPO1 PE=1 SV=2	5.56793	4	4	4	1	898	102.289	4.98	20.64	4
Q9NR31	GTP-binding protein SAR1a OS=Homo sapiens GN=SAR1A PE=1 SV=1	5.55556	1	1	1	1	198	22.353	6.68	44.15	1
Q9Y6B6	GTP-binding protein SAR1b OS=Homo sapiens GN=SAR1B PE=1 SV=1	5.55556	1	1	1	1	198	22.396	6.11	44.15	1
O75436	Vacuolar protein sorting-associated protein 26A OS=Homo sapiens GN=VPS26A PE=1 SV=2	5.50459	1	1	1	1	327	38.146	6.57	36.2	1
Q13409	Cytoplasmic dynein 1 intermediate chain 2 OS=Homo sapiens GN=DYNC1I2 PE=1 SV=3	5.48589	2	2	2	1	638	71.412	5.2	136.81	2
P10412	Histone H1.4 OS=Homo sapiens GN=HIST1H1E PE=1 SV=2	5.47945	1	1	1	1	219	21.852	11.03	0	1
Q15286	Ras-related protein Rab-35 OS=Homo sapiens GN=RAB35 PE=1 SV=1	5.47264	1	1	0	5	201	23.011	8.29	43.94	1
Q9NVH6	Trimethyllysine dioxygenase, mitochondrial OS=Homo sapiens GN=TMLHE PE=1 SV=1	5.46318	2	2	2	1	421	49.486	7.72	17.34	2
P18621	60S ribosomal protein L17 OS=Homo sapiens GN=RPL17 PE=1 SV=3	5.43478	1	1	1	1	184	21.383	10.17	39.51	1
P16402	Histone H1.3 OS=Homo sapiens GN=HIST1H1D PE=1 SV=2	5.42986	1	1	1	1	221	22.336	11.02	0	1
Q15771	Ras-related protein Rab-30 OS=Homo sapiens GN=RAB30 PE=1 SV=2	5.41872	1	1	0	5	203	23.044	4.97	43.94	1
P57721	Poly(rC)-binding protein 3 OS=Homo sapiens GN=PCBP3 PE=2 SV=2	5.39084	1	1	1	1	371	39.44	8.07	67.59	1
Q9BQI0	Allograft inflammatory factor 1-like OS=Homo sapiens GN=AIF1L PE=1 SV=1	5.33333	1	1	1	1	150	17.057	7.2	0	1
P09012	U1 small nuclear ribonucleoprotein A OS=Homo sapiens GN=SNRPA PE=1 SV=3	5.31915	2	2	2	1	282	31.259	9.83	57.56	2
P53621	Coatomer subunit alpha OS=Homo sapiens GN=COPA PE=1 SV=2	5.31046	6	6	6	1	1224	138.258	7.66	95.1998	6
Q9NRW1	Ras-related protein Rab-6B OS=Homo sapiens GN=RAB6B PE=1 SV=1	5.28846	1	1	0	5	208	23.447	5.53	43.94	1
Q96MF7	E3 SUMO-protein ligase NSE2 OS=Homo sapiens GN=NSMCE2 PE=1 SV=2	5.26316	1	1	1	1	247	27.915	7.74	26.47	1
Q9BVI4	Nucleolar complex protein 4 homolog OS=Homo sapiens GN=NOC4L PE=1 SV=1	5.23256	1	1	1	1	516	58.431	7.49	0	1
Q00839	Heterogeneous nuclear ribonucleoprotein U OS=Homo sapiens GN=HNRNPU PE=1 SV=6	5.21212	4	4	4	1	825	90.528	6	72.16	4
Q86YS6	Ras-related protein Rab-43 OS=Homo sapiens GN=RAB43 PE=1 SV=1	5.18868	1	1	0	5	212	23.325	5.64	43.94	1
P59190	Ras-related protein Rab-15 OS=Homo sapiens GN=RAB15 PE=1 SV=1	5.18868	1	1	0	5	212	24.375	5.71	43.94	1
P33947	ER lumen protein-retaining receptor 2 OS=Homo sapiens GN=KDELR2 PE=1 SV=1	5.18868	1	1	1	1	212	24.406	8.72	0	1
P24390	ER lumen protein-retaining receptor 1 OS=Homo sapiens GN=KDELR1 PE=1 SV=1	5.18868	1	1	1	1	212	24.526	8.62	0	1
Q9UEU0	Vesicle transport through interaction with t-SNAREs homolog 1B OS=Homo sapiens GN=VTI1B PE=1 SV=3	5.17241	1	1	1	1	232	26.672	9.04	34.7	1
Q5JTH9	RRP12-like protein OS=Homo sapiens GN=RRP12 PE=1 SV=2	5.16577	6	6	6	1	1297	143.611	8.75	114.27	6
Q96DA2	Ras-related protein Rab-39B OS=Homo sapiens GN=RAB39B PE=1 SV=1	5.16432	1	1	0	5	213	24.607	7.83	43.94	1
P61018	Ras-related protein Rab-4B OS=Homo sapiens GN=RAB4B PE=1 SV=1	5.16432	1	1	0	5	213	23.572	6.06	43.94	1
Q8NAV1	Pre-mRNA-splicing factor 38A OS=Homo sapiens GN=PRPF38A PE=1 SV=1	5.12821	1	1	1	1	312	37.453	9.96	48.29	1
Q8IWB7	WD repeat and FYVE domain-containing protein 1 OS=Homo sapiens GN=WDFY1 PE=1 SV=1	5.12195	2	2	2	1	410	46.293	7.33	22.59	2
P67870	Casein kinase II subunit beta OS=Homo sapiens GN=CSNK2B PE=1 SV=1	5.11628	1	1	1	1	215	24.926	5.55	15.26	1
Q5W111	SPRY domain-containing protein 7 OS=Homo sapiens GN=SPRYD7 PE=1 SV=2	5.10204	1	1	1	1	196	21.652	6.7	21.4	1
P41091	Eukaryotic translation initiation factor 2 subunit 3 OS=Homo sapiens GN=EIF2S3 PE=1 SV=3	5.08475	2	2	2	1	472	51.077	8.4	66.32	2
Q2VIR3	Putative eukaryotic translation initiation factor 2 subunit 3-like protein OS=Homo sapiens GN=EIF2S3L PE=5 SV=2	5.08475	2	2	2	1	472	51.196	8.4	66.32	2
Q8WUA2	Peptidyl-prolyl cis-trans isomerase-like 4 OS=Homo sapiens GN=PPIL4 PE=1 SV=1	5.0813	2	2	2	1	492	57.189	5.92	48.22	2
Q14964	Ras-related protein Rab-39A OS=Homo sapiens GN=RAB39A PE=1 SV=2	5.06912	1	1	0	5	217	24.991	7.65	43.94	1
P56557	Transmembrane protein 50B OS=Homo sapiens GN=TMEM50B PE=1 SV=2	5.06329	1	1	1	1	158	17.924	5.39	49.34	1
P20645	Cation-dependent mannose-6-phosphate receptor OS=Homo sapiens GN=M6PR PE=1 SV=1	5.05415	1	2	1	1	277	30.973	5.83	124.83	1
P05388	60S acidic ribosomal protein P0 OS=Homo sapiens GN=RPLP0 PE=1 SV=1	5.04732	2	2	2	1	317	34.252	5.97	48.57	2
P20338	Ras-related protein Rab-4A OS=Homo sapiens GN=RAB4A PE=1 SV=3	5.04587	1	1	0	5	218	24.374	6.07	43.94	1
O95163	Elongator complex protein 1 OS=Homo sapiens GN=IKBKAP PE=1 SV=3	5.03003	4	5	4	1	1332	150.159	5.94	202.73	4
O75818	Ribonuclease P protein subunit p40 OS=Homo sapiens GN=RPP40 PE=1 SV=3	4.95868	1	1	1	1	363	41.807	6.67	27.06	1
Q9BVC6	Transmembrane protein 109 OS=Homo sapiens GN=TMEM109 PE=1 SV=1	4.93827	1	1	1	1	243	26.194	10.48	50.61	1
Q96AX2	Ras-related protein Rab-37 OS=Homo sapiens GN=RAB37 PE=1 SV=3	4.93274	1	1	0	5	223	24.799	6.35	43.94	1
P53680	AP-2 complex subunit sigma OS=Homo sapiens GN=AP2S1 PE=1 SV=2	4.92958	1	1	1	1	142	17.007	6.18	31.28	1
Q15041	ADP-ribosylation factor-like protein 6-interacting protein 1 OS=Homo sapiens GN=ARL6IP1 PE=1 SV=2	4.92611	1	1	1	1	203	23.347	9.32	0	1
O43823	A-kinase anchor protein 8 OS=Homo sapiens GN=AKAP8 PE=1 SV=1	4.91329	2	2	2	1	692	76.061	5.15	105.87	2
Q9Y2D5	A-kinase anchor protein 2 OS=Homo sapiens GN=AKAP2 PE=1 SV=3	4.88941	2	2	2	1	859	94.603	5.11	0	2
P57088	Transmembrane protein 33 OS=Homo sapiens GN=TMEM33 PE=1 SV=2	4.8583	1	1	1	1	247	27.96	9.7	45.39	1
P25490	Transcriptional repressor protein YY1 OS=Homo sapiens GN=YY1 PE=1 SV=2	4.83092	1	1	1	1	414	44.685	6.25	104.77	1
Q13554	Calcium/calmodulin-dependent protein kinase type II subunit beta OS=Homo sapiens GN=CAMK2B PE=1 SV=3	4.8048	3	3	1	1	666	72.632	7.27	66.36	3
Q9H082	Ras-related protein Rab-33B OS=Homo sapiens GN=RAB33B PE=1 SV=1	4.80349	1	1	0	5	229	25.701	7.18	43.94	1
Q00765	Receptor expression-enhancing protein 5 OS=Homo sapiens GN=REEP5 PE=1 SV=3	4.7619	1	1	1	1	189	21.479	8.1	28.68	1
O14639	Actin-binding LIM protein 1 OS=Homo sapiens GN=ABLIM1 PE=1 SV=3	4.75578	3	4	3	1	778	87.631	8.59	125.88	3
P50990	T-complex protein 1 subunit theta OS=Homo sapiens GN=CCT8 PE=1 SV=4	4.74453	2	2	2	1	548	59.583	5.6	93.69	2
P15924	Desmoplakin OS=Homo sapiens GN=DSP PE=1 SV=3	4.73703	11	11	11	1	2871	331.569	6.81	306.771	11
Q14247	Src substrate cortactin OS=Homo sapiens GN=CTTN PE=1 SV=2	4.72727	2	2	2	1	550	61.549	5.4	39.72	2
Q9NV96	Cell cycle control protein 50A OS=Homo sapiens GN=TMEM30A PE=1 SV=1	4.70914	1	1	1	1	361	40.658	8.59	39.92	1
Q9H4B7	Tubulin beta-1 chain OS=Homo sapiens GN=TUBB1 PE=1 SV=1	4.65632	3	6	0	3	451	50.295	5.17	144.46	3
Q9Y463	Dual specificity tyrosine-phosphorylation-regulated kinase 1B OS=Homo sapiens GN=DYRK1B PE=1 SV=1	4.61049	3	3	3	1	629	69.154	9.13	50.42	3
Q12849	G-rich sequence factor 1 OS=Homo sapiens GN=GRSF1 PE=1 SV=3	4.58333	1	1	1	1	480	53.093	6.19	98.27	1
Q96SB4	SRSF protein kinase 1 OS=Homo sapiens GN=SRPK1 PE=1 SV=2	4.58015	2	2	2	1	655	74.278	6.16	103.875	2
Q6DN90	IQ motif and SEC7 domain-containing protein 1 OS=Homo sapiens GN=IQSEC1 PE=1 SV=1	4.56906	4	4	4	1	963	108.247	6.93	105.82	4
P01857	Ig gamma-1 chain C region OS=Homo sapiens GN=IGHG1 PE=1 SV=1	4.54545	2	2	2	1	330	36.083	8.19	27.69	2
Q6IQ22	Ras-related protein Rab-12 OS=Homo sapiens GN=RAB12 PE=1 SV=3	4.5082	1	1	0	5	244	27.231	8.41	43.94	1
P13010	X-ray repair cross-complementing protein 5 OS=Homo sapiens GN=XRCC5 PE=1 SV=3	4.5082	2	2	2	1	732	82.652	5.81	29.26	2
Q8WTT2	Nucleolar complex protein 3 homolog OS=Homo sapiens GN=NOC3L PE=1 SV=1	4.5	2	2	2	1	800	92.49	9.17	41.44	2
P07814	Bifunctional glutamate/proline--tRNA ligase OS=Homo sapiens GN=EPRS PE=1 SV=5	4.49735	5	5	5	1	1512	170.483	7.33	59.2646	5
O43657	Tetraspanin-6 OS=Homo sapiens GN=TSPAN6 PE=1 SV=1	4.4898	1	1	1	1	245	27.545	8.1	34.06	1
Q8NCG7	Sn1-specific diacylglycerol lipase beta OS=Homo sapiens GN=DAGLB PE=1 SV=2	4.46429	2	2	2	1	672	73.684	6.55	35.16	2
P78332	RNA-binding protein 6 OS=Homo sapiens GN=RBM6 PE=1 SV=5	4.45236	3	5	3	1	1123	128.565	6.32	125.13	3
P15880	40S ribosomal protein S2 OS=Homo sapiens GN=RPS2 PE=1 SV=2	4.43686	1	1	1	1	293	31.305	10.24	65.65	1
Q9NRF8	CTP synthase 2 OS=Homo sapiens GN=CTPS2 PE=1 SV=1	4.43686	2	2	2	1	586	65.636	6.9	40.93	2
Q9UL40	Zinc finger protein 346 OS=Homo sapiens GN=ZNF346 PE=1 SV=1	4.42177	1	1	1	1	294	32.912	9.09	46.71	1
P29508	Serpin B3 OS=Homo sapiens GN=SERPINB3 PE=1 SV=2	4.35897	2	2	2	1	390	44.537	6.81	52.58	2
P48594	Serpin B4 OS=Homo sapiens GN=SERPINB4 PE=1 SV=2	4.35897	2	2	2	1	390	44.825	6.21	52.58	2
Q16740	ATP-dependent Clp protease proteolytic subunit, mitochondrial OS=Homo sapiens GN=CLPP PE=1 SV=1	4.33213	1	1	1	1	277	30.161	8.09	0	1
O15027	Protein transport protein Sec16A OS=Homo sapiens GN=SEC16A PE=1 SV=3	4.31391	6	7	6	1	2179	233.373	5.63	74.22	6
Q92769	Histone deacetylase 2 OS=Homo sapiens GN=HDAC2 PE=1 SV=2	4.30328	2	2	1	1	488	55.329	5.91	62.34	2
Q9H0G5	Nuclear speckle splicing regulatory protein 1 OS=Homo sapiens GN=NSRP1 PE=1 SV=1	4.30108	2	2	2	1	558	66.35	8.84	101.9	2
Q9H3N1	Thioredoxin-related transmembrane protein 1 OS=Homo sapiens GN=TMX1 PE=1 SV=1	4.28571	1	1	1	1	280	31.771	4.98	65.85	1
P08238	Heat shock protein HSP 90-beta OS=Homo sapiens GN=HSP90AB1 PE=1 SV=4	4.28177	3	3	3	1	724	83.212	5.03	132.72	3
P08729	Keratin, type II cytoskeletal 7 OS=Homo sapiens GN=KRT7 PE=1 SV=5	4.26439	3	3	0	0	469	51.354	5.48	85.6733	3
Q52LJ0	Protein FAM98B OS=Homo sapiens GN=FAM98B PE=1 SV=1	4.24242	1	1	1	1	330	37.167	6.29	49.15	1
Q9ULF5	Zinc transporter ZIP10 OS=Homo sapiens GN=SLC39A10 PE=1 SV=2	4.21179	2	2	2	1	831	94.073	6.76	33.22	2
A5YKK6	CCR4-NOT transcription complex subunit 1 OS=Homo sapiens GN=CNOT1 PE=1 SV=2	4.20875	8	8	8	1	2376	266.768	7.11	149.941	8
P61619	Protein transport protein Sec61 subunit alpha isoform 1 OS=Homo sapiens GN=SEC61A1 PE=1 SV=2	4.20168	2	2	2	1	476	52.231	8.06	23.01	2
P0CG38	POTE ankyrin domain family member I OS=Homo sapiens GN=POTEI PE=3 SV=1	4.18605	4	6	0	2	1075	121.205	6.21	237.22	4
Q96QD8	Sodium-coupled neutral amino acid transporter 2 OS=Homo sapiens GN=SLC38A2 PE=1 SV=2	4.1502	1	1	1	1	506	55.99	8	19.65	1
P61586	Transforming protein RhoA OS=Homo sapiens GN=RHOA PE=1 SV=1	4.14508	1	1	1	1	193	21.754	6.1	23.14	1
P08134	Rho-related GTP-binding protein RhoC OS=Homo sapiens GN=RHOC PE=1 SV=1	4.14508	1	1	1	1	193	21.992	6.58	23.14	1
Q14152	Eukaryotic translation initiation factor 3 subunit A OS=Homo sapiens GN=EIF3A PE=1 SV=1	4.12446	6	6	6	1	1382	166.468	6.79	116.167	6
O75821	Eukaryotic translation initiation factor 3 subunit G OS=Homo sapiens GN=EIF3G PE=1 SV=2	4.0625	1	1	1	1	320	35.589	6.13	0	1
Q96CS3	FAS-associated factor 2 OS=Homo sapiens GN=FAF2 PE=1 SV=2	4.04494	1	1	1	1	445	52.591	5.62	44.71	1
P18754	Regulator of chromosome condensation OS=Homo sapiens GN=RCC1 PE=1 SV=1	4.038	1	1	1	1	421	44.941	7.52	21.9	1
Q06830	Peroxiredoxin-1 OS=Homo sapiens GN=PRDX1 PE=1 SV=1	4.0201	1	1	1	1	199	22.096	8.13	0	1
Q7Z3Z0	Keratin, type I cytoskeletal 25 OS=Homo sapiens GN=KRT25 PE=1 SV=1	4	2	7	1	1	450	49.287	5.08	105.323	2
P53985	Monocarboxylate transporter 1 OS=Homo sapiens GN=SLC16A1 PE=1 SV=3	4	1	1	1	1	500	53.909	8.66	46.6	1
Q13347	Eukaryotic translation initiation factor 3 subunit I OS=Homo sapiens GN=EIF3I PE=1 SV=1	4	1	1	1	1	325	36.479	5.64	46.03	1
Q13733	Sodium/potassium-transporting ATPase subunit alpha-4 OS=Homo sapiens GN=ATP1A4 PE=1 SV=3	3.98445	2	2	2	1	1029	114.093	6.64	149.12	2
P56270	Myc-associated zinc finger protein OS=Homo sapiens GN=MAZ PE=1 SV=1	3.98323	2	2	2	1	477	48.576	8.95	28.53	2
P01860	Ig gamma-3 chain C region OS=Homo sapiens GN=IGHG3 PE=1 SV=2	3.97878	2	2	2	1	377	41.26	7.9	27.69	2
Q9UQM7	Calcium/calmodulin-dependent protein kinase type II subunit alpha OS=Homo sapiens GN=CAMK2A PE=1 SV=2	3.9749	2	2	0	2	478	54.054	7.08	13.04	2
Q3SXZ3	Zinc finger protein 718 OS=Homo sapiens GN=ZNF718 PE=2 SV=1	3.9749	1	3	1	1	478	55.369	9.45	0	1
Q01844	RNA-binding protein EWS OS=Homo sapiens GN=EWSR1 PE=1 SV=1	3.96341	2	2	2	1	656	68.436	9.33	57.79	2
Q12788	Transducin beta-like protein 3 OS=Homo sapiens GN=TBL3 PE=1 SV=2	3.9604	2	2	2	1	808	88.978	6.9	36.38	2
Q5BKZ1	DBIRD complex subunit ZNF326 OS=Homo sapiens GN=ZNF326 PE=1 SV=2	3.95189	1	1	1	1	582	65.613	5.15	17.48	1
Q14103	Heterogeneous nuclear ribonucleoprotein D0 OS=Homo sapiens GN=HNRNPD PE=1 SV=1	3.94366	1	1	1	1	355	38.41	7.81	47.98	1
P54709	Sodium/potassium-transporting ATPase subunit beta-3 OS=Homo sapiens GN=ATP1B3 PE=1 SV=1	3.94265	1	1	1	1	279	31.492	8.35	18.61	1
P51153	Ras-related protein Rab-13 OS=Homo sapiens GN=RAB13 PE=1 SV=1	3.94089	1	1	1	1	203	22.76	9.19	14.15	1
P07237	Protein disulfide-isomerase OS=Homo sapiens GN=P4HB PE=1 SV=3	3.93701	2	2	2	1	508	57.081	4.87	40.07	2
P15622	Zinc finger protein 250 OS=Homo sapiens GN=ZNF250 PE=1 SV=3	3.92857	2	2	2	1	560	63.427	8.28	50.74	2
Q14839	Chromodomain-helicase-DNA-binding protein 4 OS=Homo sapiens GN=CHD4 PE=1 SV=2	3.92259	5	6	5	1	1912	217.867	5.86	154.437	5
Q7Z3Y8	Keratin, type I cytoskeletal 27 OS=Homo sapiens GN=KRT27 PE=1 SV=2	3.92157	2	7	1	1	459	49.792	5.05	105.323	2
P30479	HLA class I histocompatibility antigen, B-41 alpha chain OS=Homo sapiens GN=HLA-B PE=1 SV=1	3.8674	1	1	1	1	362	40.514	6.54	44.77	1
P30460	HLA class I histocompatibility antigen, B-8 alpha chain OS=Homo sapiens GN=HLA-B PE=1 SV=1	3.8674	1	1	1	1	362	40.306	5.71	44.77	1
P30480	HLA class I histocompatibility antigen, B-42 alpha chain OS=Homo sapiens GN=HLA-B PE=1 SV=1	3.8674	1	1	1	1	362	40.308	5.85	44.77	1
P01889	HLA class I histocompatibility antigen, B-7 alpha chain OS=Homo sapiens GN=HLA-B PE=1 SV=3	3.8674	1	1	1	1	362	40.435	5.85	44.77	1
Q04826	HLA class I histocompatibility antigen, B-40 alpha chain OS=Homo sapiens GN=HLA-B PE=1 SV=1	3.8674	1	1	1	1	362	40.48	6.54	44.77	1
Q9P035	Very-long-chain (3R)-3-hydroxyacyl-CoA dehydratase 3 OS=Homo sapiens GN=HACD3 PE=1 SV=2	3.8674	1	1	1	1	362	43.132	8.94	44.66	1
Q9UKJ3	G patch domain-containing protein 8 OS=Homo sapiens GN=GPATCH8 PE=1 SV=2	3.86152	4	4	4	1	1502	164.098	8.66	54.3	4
Q31612	HLA class I histocompatibility antigen, B-73 alpha chain OS=Homo sapiens GN=HLA-B PE=1 SV=1	3.85675	1	1	1	1	363	40.41	6.24	44.77	1
P52597	Heterogeneous nuclear ribonucleoprotein F OS=Homo sapiens GN=HNRNPF PE=1 SV=3	3.85542	1	1	1	1	415	45.643	5.58	105.46	1
O15014	Zinc finger protein 609 OS=Homo sapiens GN=ZNF609 PE=1 SV=2	3.82707	4	5	4	1	1411	151.098	8.03	133.107	4
P30499	HLA class I histocompatibility antigen, Cw-1 alpha chain OS=Homo sapiens GN=HLA-C PE=1 SV=1	3.82514	1	1	1	1	366	40.939	5.71	44.77	1
P10321	HLA class I histocompatibility antigen, Cw-7 alpha chain OS=Homo sapiens GN=HLA-C PE=1 SV=3	3.82514	1	1	1	1	366	40.623	6.04	44.77	1
P30510	HLA class I histocompatibility antigen, Cw-14 alpha chain OS=Homo sapiens GN=HLA-C PE=1 SV=2	3.82514	1	1	1	1	366	40.812	6.15	44.77	1
P30504	HLA class I histocompatibility antigen, Cw-4 alpha chain OS=Homo sapiens GN=HLA-C PE=1 SV=1	3.82514	1	1	1	1	366	40.969	6.47	44.77	1
P30505	HLA class I histocompatibility antigen, Cw-8 alpha chain OS=Homo sapiens GN=HLA-C PE=1 SV=1	3.82514	1	1	1	1	366	40.747	6.98	44.77	1
P30501	HLA class I histocompatibility antigen, Cw-2 alpha chain OS=Homo sapiens GN=HLA-C PE=1 SV=1	3.82514	1	1	1	1	366	41.069	6.11	44.77	1
P30508	HLA class I histocompatibility antigen, Cw-12 alpha chain OS=Homo sapiens GN=HLA-C PE=1 SV=2	3.82514	1	1	1	1	366	40.86	6.3	44.77	1
Q29963	HLA class I histocompatibility antigen, Cw-6 alpha chain OS=Homo sapiens GN=HLA-C PE=1 SV=2	3.82514	1	1	1	1	366	40.943	6	44.77	1
Q29865	HLA class I histocompatibility antigen, Cw-18 alpha chain OS=Homo sapiens GN=HLA-C PE=1 SV=1	3.82514	1	1	1	1	366	40.907	6.62	44.77	1
Q07000	HLA class I histocompatibility antigen, Cw-15 alpha chain OS=Homo sapiens GN=HLA-C PE=1 SV=1	3.82514	1	1	1	1	366	40.837	6.33	44.77	1
P04222	HLA class I histocompatibility antigen, Cw-3 alpha chain OS=Homo sapiens GN=HLA-C PE=1 SV=2	3.82514	1	1	1	1	366	40.835	6.39	44.77	1
P54855	UDP-glucuronosyltransferase 2B15 OS=Homo sapiens GN=UGT2B15 PE=1 SV=3	3.77358	1	1	1	1	530	60.996	8.82	0	1
O15226	NF-kappa-B-repressing factor OS=Homo sapiens GN=NKRF PE=1 SV=2	3.76812	2	2	2	1	690	77.624	8.79	32.76	2
O14744	Protein arginine N-methyltransferase 5 OS=Homo sapiens GN=PRMT5 PE=1 SV=4	3.76766	2	2	2	1	637	72.638	6.29	19.81	2
Q9NRX5	Serine incorporator 1 OS=Homo sapiens GN=SERINC1 PE=1 SV=1	3.75276	1	1	1	1	453	50.461	5.85	78.06	1
O75396	Vesicle-trafficking protein SEC22b OS=Homo sapiens GN=SEC22B PE=1 SV=4	3.72093	1	1	1	1	215	24.578	6.92	0	1
Q6ZVX7	F-box only protein 50 OS=Homo sapiens GN=NCCRP1 PE=1 SV=1	3.63636	1	1	1	1	275	30.828	6.62	0	1
Q3SY84	Keratin, type II cytoskeletal 71 OS=Homo sapiens GN=KRT71 PE=1 SV=3	3.63289	3	3	1	0	523	57.256	6.61	61.0067	3
P42694	Probable helicase with zinc finger domain OS=Homo sapiens GN=HELZ PE=1 SV=2	3.60453	6	6	6	1	1942	218.833	7.42	120.48	6
Q7RTS7	Keratin, type II cytoskeletal 74 OS=Homo sapiens GN=KRT74 PE=1 SV=2	3.59168	3	3	1	0	529	57.83	7.71	61.0067	3
Q01650	Large neutral amino acids transporter small subunit 1 OS=Homo sapiens GN=SLC7A5 PE=1 SV=2	3.5503	1	1	1	1	507	54.974	7.72	86.27	1
Q96P16	Regulation of nuclear pre-mRNA domain-containing protein 1A OS=Homo sapiens GN=RPRD1A PE=1 SV=1	3.52564	1	1	1	1	312	35.698	7.55	14.7	1
Q14CN4	Keratin, type II cytoskeletal 72 OS=Homo sapiens GN=KRT72 PE=1 SV=2	3.5225	3	3	0	3	511	55.842	6.89	54.221	3
Q9UHI6	Probable ATP-dependent RNA helicase DDX20 OS=Homo sapiens GN=DDX20 PE=1 SV=2	3.51942	2	2	2	1	824	92.183	6.95	13.88	2
Q86Y46	Keratin, type II cytoskeletal 73 OS=Homo sapiens GN=KRT73 PE=1 SV=1	3.51852	3	3	1	0	540	58.887	7.23	61.0067	3
Q5D862	Filaggrin-2 OS=Homo sapiens GN=FLG2 PE=1 SV=1	3.51317	5	6	5	1	2391	247.928	8.31	213.342	5
P57678	Gem-associated protein 4 OS=Homo sapiens GN=GEMIN4 PE=1 SV=2	3.49716	3	3	3	1	1058	119.96	6.04	41.45	3
Q658P3	Metalloreductase STEAP3 OS=Homo sapiens GN=STEAP3 PE=1 SV=2	3.48361	1	1	1	1	488	54.566	8.6	47.26	1
Q92820	Gamma-glutamyl hydrolase OS=Homo sapiens GN=GGH PE=1 SV=2	3.45912	1	1	1	1	318	35.941	7.11	29.05	1
Q8WXF1	Paraspeckle component 1 OS=Homo sapiens GN=PSPC1 PE=1 SV=1	3.44168	2	4	1	1	523	58.706	6.67	67.2588	2
Q2M2I5	Keratin, type I cytoskeletal 24 OS=Homo sapiens GN=KRT24 PE=1 SV=1	3.42857	2	6	1	1	525	55.053	4.96	221.963	2
Q9H1A4	Anaphase-promoting complex subunit 1 OS=Homo sapiens GN=ANAPC1 PE=1 SV=1	3.39506	4	5	4	1	1944	216.361	6.3	108.933	4
Q6DD87	Zinc finger protein 787 OS=Homo sapiens GN=ZNF787 PE=1 SV=3	3.39426	1	1	1	1	383	40.518	7.84	0	1
Q14697	Neutral alpha-glucosidase AB OS=Homo sapiens GN=GANAB PE=1 SV=3	3.38983	2	2	2	1	944	106.807	6.14	112.12	2
P04632	Calpain small subunit 1 OS=Homo sapiens GN=CAPNS1 PE=1 SV=1	3.35821	1	1	1	1	268	28.298	5.2	31.35	1
P53618	Coatomer subunit beta OS=Homo sapiens GN=COPB1 PE=1 SV=3	3.35782	2	2	2	1	953	107.074	6.05	67.92	2
A6NHQ2	rRNA/tRNA 2'-O-methyltransferase fibrillarin-like protein 1 OS=Homo sapiens GN=FBLL1 PE=3 SV=2	3.29341	1	1	1	1	334	34.782	10.35	0	1
P07900	Heat shock protein HSP 90-alpha OS=Homo sapiens GN=HSP90AA1 PE=1 SV=5	3.27869	2	2	2	1	732	84.607	5.02	132.72	2
P0CG39	POTE ankyrin domain family member J OS=Homo sapiens GN=POTEJ PE=3 SV=1	3.27553	3	5	0	2	1038	117.315	5.97	233.14	3
P31689	DnaJ homolog subfamily A member 1 OS=Homo sapiens GN=DNAJA1 PE=1 SV=2	3.27456	1	1	1	1	397	44.839	7.08	58.72	1
Q9H2K2	Tankyrase-2 OS=Homo sapiens GN=TNKS2 PE=1 SV=1	3.25901	3	3	3	1	1166	126.838	7.2	103.673	3
Q96AG4	Leucine-rich repeat-containing protein 59 OS=Homo sapiens GN=LRRC59 PE=1 SV=1	3.25733	1	1	1	1	307	34.909	9.57	0	1
Q7L2H7	Eukaryotic translation initiation factor 3 subunit M OS=Homo sapiens GN=EIF3M PE=1 SV=1	3.20856	1	1	1	1	374	42.476	5.63	84.01	1
Q07065	Cytoskeleton-associated protein 4 OS=Homo sapiens GN=CKAP4 PE=1 SV=2	3.15615	1	1	1	1	602	65.983	5.92	42.59	1
P54098	DNA polymerase subunit gamma-1 OS=Homo sapiens GN=POLG PE=1 SV=1	3.1477	1	1	1	1	1239	139.473	6.9	0	1
O75787	Renin receptor OS=Homo sapiens GN=ATP6AP2 PE=1 SV=2	3.14286	1	1	1	1	350	38.983	6.1	38.05	1
P62995	Transformer-2 protein homolog beta OS=Homo sapiens GN=TRA2B PE=1 SV=1	3.125	1	1	1	1	288	33.646	11.25	45.96	1
O00541	Pescadillo homolog OS=Homo sapiens GN=PES1 PE=1 SV=1	3.06122	1	1	1	1	588	67.96	7.33	24.58	1
Q8N1A0	Keratin-like protein KRT222 OS=Homo sapiens GN=KRT222 PE=2 SV=1	3.05085	1	1	0	3	295	34.137	5.87	46.07	1
Q15059	Bromodomain-containing protein 3 OS=Homo sapiens GN=BRD3 PE=1 SV=1	3.0303	2	2	2	1	726	79.492	9.36	41	2
Q9UPT8	Zinc finger CCCH domain-containing protein 4 OS=Homo sapiens GN=ZC3H4 PE=1 SV=3	2.99309	2	2	2	1	1303	140.169	6.27	115.38	2
P78371	T-complex protein 1 subunit beta OS=Homo sapiens GN=CCT2 PE=1 SV=4	2.99065	1	1	1	1	535	57.452	6.46	0	1
Q9Y5J3	Hairy/enhancer-of-split related with YRPW motif protein 1 OS=Homo sapiens GN=HEY1 PE=1 SV=1	2.96053	1	1	1	1	304	32.593	8.95	0	1
P43243	Matrin-3 OS=Homo sapiens GN=MATR3 PE=1 SV=2	2.95159	1	1	1	1	847	94.565	6.25	41.98	1
P23025	DNA repair protein complementing XP-A cells OS=Homo sapiens GN=XPA PE=1 SV=1	2.9304	1	1	1	1	273	31.348	6.73	0	1
Q9UC06	Zinc finger protein 70 OS=Homo sapiens GN=ZNF70 PE=2 SV=2	2.9148	1	1	1	1	446	50.769	8.31	51.07	1
Q96NM4	TOX high mobility group box family member 2 OS=Homo sapiens GN=TOX2 PE=2 SV=2	2.86885	1	2	1	1	488	51.571	6.71	105.87	1
Q8WXX7	Autism susceptibility gene 2 protein OS=Homo sapiens GN=AUTS2 PE=1 SV=1	2.85941	2	2	2	1	1259	138.897	9.38	61.31	2
Q9Y6Q3	Zinc finger protein 37 homolog OS=Homo sapiens GN=ZFP37 PE=2 SV=3	2.85714	2	2	2	1	630	71.164	9.09	16.1	2
Q969P6	DNA topoisomerase I, mitochondrial OS=Homo sapiens GN=TOP1MT PE=1 SV=1	2.82862	2	2	2	1	601	69.828	9.41	35.64	2
O43175	D-3-phosphoglycerate dehydrogenase OS=Homo sapiens GN=PHGDH PE=1 SV=4	2.81426	1	1	1	1	533	56.614	6.71	36.12	1
O43900	Prickle-like protein 3 OS=Homo sapiens GN=PRICKLE3 PE=1 SV=2	2.76423	1	1	1	1	615	68.565	7.88	49.79	1
O43435	T-box transcription factor TBX1 OS=Homo sapiens GN=TBX1 PE=1 SV=1	2.76382	1	1	1	1	398	43.105	8.16	0	1
P42357	Histidine ammonia-lyase OS=Homo sapiens GN=HAL PE=1 SV=1	2.73973	1	1	1	1	657	72.652	6.95	0	1
Q8IY63	Angiomotin-like protein 1 OS=Homo sapiens GN=AMOTL1 PE=1 SV=1	2.71967	3	7	3	1	956	106.508	7.11	160.038	3
Q9NYF8	Bcl-2-associated transcription factor 1 OS=Homo sapiens GN=BCLAF1 PE=1 SV=2	2.71739	2	2	2	1	920	106.059	9.98	20.01	2
Q9BTU6	Phosphatidylinositol 4-kinase type 2-alpha OS=Homo sapiens GN=PI4K2A PE=1 SV=1	2.71399	1	1	1	1	479	53.989	8.29	14.53	1
Q92901	60S ribosomal protein L3-like OS=Homo sapiens GN=RPL3L PE=2 SV=3	2.7027	1	2	1	1	407	46.267	10.45	30.43	1
Q8NDT2	Putative RNA-binding protein 15B OS=Homo sapiens GN=RBM15B PE=1 SV=3	2.69663	2	2	2	1	890	97.147	9.85	22.46	2
P06744	Glucose-6-phosphate isomerase OS=Homo sapiens GN=GPI PE=1 SV=4	2.68817	1	1	1	1	558	63.107	8.32	64.97	1
Q15046	Lysine--tRNA ligase OS=Homo sapiens GN=KARS PE=1 SV=3	2.68007	1	1	1	1	597	68.005	6.35	0	1
Q9UBP5	Hairy/enhancer-of-split related with YRPW motif protein 2 OS=Homo sapiens GN=HEY2 PE=1 SV=1	2.67062	1	1	1	1	337	35.786	8.16	0	1
P48729	Casein kinase I isoform alpha OS=Homo sapiens GN=CSNK1A1 PE=1 SV=2	2.67062	1	1	1	1	337	38.89	9.57	0	1
Q8NBQ5	Estradiol 17-beta-dehydrogenase 11 OS=Homo sapiens GN=HSD17B11 PE=1 SV=3	2.66667	1	1	1	1	300	32.915	9.07	20.06	1
Q8TD47	40S ribosomal protein S4, Y isoform 2 OS=Homo sapiens GN=RPS4Y2 PE=2 SV=3	2.6616	1	1	1	1	263	29.277	10.08	20.23	1
Q92616	eIF-2-alpha kinase activator GCN1 OS=Homo sapiens GN=GCN1 PE=1 SV=6	2.65818	4	4	4	1	2671	292.572	7.47	84.5167	4
O76021	Ribosomal L1 domain-containing protein 1 OS=Homo sapiens GN=RSL1D1 PE=1 SV=3	2.65306	1	1	1	1	490	54.939	10.13	25.84	1
P11279	Lysosome-associated membrane glycoprotein 1 OS=Homo sapiens GN=LAMP1 PE=1 SV=3	2.63789	1	1	1	1	417	44.854	8.75	0	1
Q15937	Zinc finger protein 79 OS=Homo sapiens GN=ZNF79 PE=1 SV=2	2.61044	1	1	0	0	498	55.314	8.18	51.07	1
P35900	Keratin, type I cytoskeletal 20 OS=Homo sapiens GN=KRT20 PE=1 SV=1	2.59434	2	3	0	3	424	48.457	5.69	83.6827	2
Q5T6F2	Ubiquitin-associated protein 2 OS=Homo sapiens GN=UBAP2 PE=1 SV=1	2.5916	2	2	2	1	1119	117.044	7.34	59.6	2
Q13615	Myotubularin-related protein 3 OS=Homo sapiens GN=MTMR3 PE=1 SV=3	2.58765	2	2	2	1	1198	133.534	5.8	72.95	2
P51654	Glypican-3 OS=Homo sapiens GN=GPC3 PE=1 SV=1	2.58621	1	16	1	1	580	65.52	6.37	15.09	1
Q9BUJ2	Heterogeneous nuclear ribonucleoprotein U-like protein 1 OS=Homo sapiens GN=HNRNPUL1 PE=1 SV=2	2.57009	2	2	2	1	856	95.679	6.92	76.75	2
P14136	Glial fibrillary acidic protein OS=Homo sapiens GN=GFAP PE=1 SV=1	2.5463	1	1	0	2	432	49.85	5.52	50.07	1
P11717	Cation-independent mannose-6-phosphate receptor OS=Homo sapiens GN=IGF2R PE=1 SV=3	2.5291	5	6	5	1	2491	274.199	5.94	217.057	5
Q92797	Symplekin OS=Homo sapiens GN=SYMPK PE=1 SV=2	2.51177	1	1	1	1	1274	141.059	6.13	23.47	1
Q13643	Four and a half LIM domains protein 3 OS=Homo sapiens GN=FHL3 PE=1 SV=4	2.5	1	1	1	1	280	31.171	6.2	29.86	1
Q2NL82	Pre-rRNA-processing protein TSR1 homolog OS=Homo sapiens GN=TSR1 PE=1 SV=1	2.48756	2	2	2	1	804	91.752	7.42	65.93	2
P35580	Myosin-10 OS=Homo sapiens GN=MYH10 PE=1 SV=3	2.47976	4	4	3	1	1976	228.858	5.54	125.34	4
P49711	Transcriptional repressor CTCF OS=Homo sapiens GN=CTCF PE=1 SV=1	2.47593	1	1	1	1	727	82.732	6.96	77.04	1
Q02809	Procollagen-lysine,2-oxoglutarate 5-dioxygenase 1 OS=Homo sapiens GN=PLOD1 PE=1 SV=2	2.47593	1	1	1	1	727	83.497	6.95	51.13	1
P04040	Catalase OS=Homo sapiens GN=CAT PE=1 SV=3	2.46679	1	1	1	1	527	59.719	7.39	67.96	1
O60583	Cyclin-T2 OS=Homo sapiens GN=CCNT2 PE=1 SV=2	2.46575	1	1	1	1	730	80.979	8.92	58.69	1
P60842	Eukaryotic initiation factor 4A-I OS=Homo sapiens GN=EIF4A1 PE=1 SV=1	2.46305	1	1	1	1	406	46.125	5.48	20.56	1
Q14240	Eukaryotic initiation factor 4A-II OS=Homo sapiens GN=EIF4A2 PE=1 SV=2	2.457	1	1	1	1	407	46.373	5.48	20.56	1
O95782	AP-2 complex subunit alpha-1 OS=Homo sapiens GN=AP2A1 PE=1 SV=3	2.4565	2	2	1	1	977	107.478	7.03	53.69	2
O15405	TOX high mobility group box family member 3 OS=Homo sapiens GN=TOX3 PE=1 SV=2	2.43056	1	2	1	1	576	63.302	7.85	105.87	1
O00507	Probable ubiquitin carboxyl-terminal hydrolase FAF-Y OS=Homo sapiens GN=USP9Y PE=2 SV=2	2.42661	7	7	7	1	2555	290.891	5.86	67.0319	7
O95819	Mitogen-activated protein kinase kinase kinase kinase 4 OS=Homo sapiens GN=MAP4K4 PE=1 SV=2	2.42131	2	2	2	1	1239	142.013	7.46	53.58	2
Q13867	Bleomycin hydrolase OS=Homo sapiens GN=BLMH PE=1 SV=1	2.41758	1	1	1	1	455	52.528	6.27	55.15	1
Q9NNW5	WD repeat-containing protein 6 OS=Homo sapiens GN=WDR6 PE=1 SV=1	2.40856	3	3	3	1	1121	121.647	6.87	89.58	3
Q14204	Cytoplasmic dynein 1 heavy chain 1 OS=Homo sapiens GN=DYNC1H1 PE=1 SV=5	2.38915	8	8	8	1	4646	532.072	6.4	197.263	8
P08133	Annexin A6 OS=Homo sapiens GN=ANXA6 PE=1 SV=3	2.37741	1	1	1	1	673	75.826	5.6	0	1
P55060	Exportin-2 OS=Homo sapiens GN=CSE1L PE=1 SV=3	2.36869	2	2	2	1	971	110.346	5.77	61.1111	2
Q92804	TATA-binding protein-associated factor 2N OS=Homo sapiens GN=TAF15 PE=1 SV=1	2.36486	1	1	1	1	592	61.793	8.02	31.04	1
Q86XP3	ATP-dependent RNA helicase DDX42 OS=Homo sapiens GN=DDX42 PE=1 SV=1	2.34542	1	1	1	1	938	102.912	7.02	27.05	1
O00148	ATP-dependent RNA helicase DDX39A OS=Homo sapiens GN=DDX39A PE=1 SV=2	2.34192	1	1	1	1	427	49.098	5.68	27.86	1
Q13838	Spliceosome RNA helicase DDX39B OS=Homo sapiens GN=DDX39B PE=1 SV=1	2.33645	1	1	1	1	428	48.96	5.67	27.86	1
Q9NZB2	Constitutive coactivator of PPAR-gamma-like protein 1 OS=Homo sapiens GN=FAM120A PE=1 SV=2	2.32558	2	2	2	1	1118	121.811	8.88	52.47	2
P58317	Zinc finger protein 121 OS=Homo sapiens GN=ZNF121 PE=3 SV=2	2.30769	1	1	1	1	390	44.665	8.05	14.38	1
P22626	Heterogeneous nuclear ribonucleoproteins A2/B1 OS=Homo sapiens GN=HNRNPA2B1 PE=1 SV=2	2.26629	1	1	1	1	353	37.407	8.95	0	1
Q9H2H9	Sodium-coupled neutral amino acid transporter 1 OS=Homo sapiens GN=SLC38A1 PE=1 SV=1	2.25873	1	1	1	1	487	54.012	7.02	23.6	1
Q9NYW8	RB-associated KRAB zinc finger protein OS=Homo sapiens GN=RBAK PE=1 SV=1	2.2409	1	1	1	1	714	82.941	7.33	22.45	1
Q9UHB6	LIM domain and actin-binding protein 1 OS=Homo sapiens GN=LIMA1 PE=1 SV=1	2.23979	1	1	1	1	759	85.173	6.84	14.93	1
O95573	Long-chain-fatty-acid--CoA ligase 3 OS=Homo sapiens GN=ACSL3 PE=1 SV=3	2.22222	1	1	1	1	720	80.368	8.38	15.76	1
Q8NHW5	60S acidic ribosomal protein P0-like OS=Homo sapiens GN=RPLP0P6 PE=5 SV=1	2.2082	1	1	1	1	317	34.343	5.55	33.22	1
P35606	Coatomer subunit beta' OS=Homo sapiens GN=COPB2 PE=1 SV=2	2.20751	1	1	1	1	906	102.422	5.27	0	1
Q17RY0	Cytoplasmic polyadenylation element-binding protein 4 OS=Homo sapiens GN=CPEB4 PE=1 SV=1	2.19479	1	1	1	1	729	80.102	7.18	50.38	1
P28799	Granulins OS=Homo sapiens GN=GRN PE=1 SV=2	2.19224	1	1	1	1	593	63.5	6.83	28.87	1
Q5T8P6	RNA-binding protein 26 OS=Homo sapiens GN=RBM26 PE=1 SV=3	2.18471	2	2	1	1	1007	113.527	9.16	74.23	2
Q9Y5L0	Transportin-3 OS=Homo sapiens GN=TNPO3 PE=1 SV=3	2.16685	1	1	1	1	923	104.136	5.57	60.2	1
Q10570	Cleavage and polyadenylation specificity factor subunit 1 OS=Homo sapiens GN=CPSF1 PE=1 SV=2	2.1483	3	3	3	1	1443	160.782	6.4	39.63	3
P01859	Ig gamma-2 chain C region OS=Homo sapiens GN=IGHG2 PE=1 SV=2	2.14724	1	1	1	1	326	35.878	7.59	27.69	1
Q5SW79	Centrosomal protein of 170 kDa OS=Homo sapiens GN=CEP170 PE=1 SV=1	2.14646	2	2	2	1	1584	175.187	7.11	109.56	2
P01861	Ig gamma-4 chain C region OS=Homo sapiens GN=IGHG4 PE=1 SV=1	2.14067	1	1	1	1	327	35.918	7.36	27.69	1
O43684	Mitotic checkpoint protein BUB3 OS=Homo sapiens GN=BUB3 PE=1 SV=1	2.13415	1	1	1	1	328	37.131	6.84	24.77	1
Q9C075	Keratin, type I cytoskeletal 23 OS=Homo sapiens GN=KRT23 PE=1 SV=2	2.1327	1	1	1	1	422	48.101	6.54	0	1
P41219	Peripherin OS=Homo sapiens GN=PRPH PE=1 SV=2	2.12766	1	1	1	1	470	53.618	5.47	38.2	1
Q53GS9	U4/U6.U5 tri-snRNP-associated protein 2 OS=Homo sapiens GN=USP39 PE=1 SV=2	2.12389	1	1	1	1	565	65.34	8.91	0	1
Q9ULV4	Coronin-1C OS=Homo sapiens GN=CORO1C PE=1 SV=1	2.1097	1	1	1	1	474	53.215	7.08	17.34	1
P11277	Spectrin beta chain, erythrocytic OS=Homo sapiens GN=SPTB PE=1 SV=5	2.10576	4	7	1	1	2137	246.316	5.27	197.444	4
Q96NW4	Ankyrin repeat domain-containing protein 27 OS=Homo sapiens GN=ANKRD27 PE=1 SV=2	2.09524	1	1	1	1	1050	116.91	6.87	46.07	1
A6NFI3	Zinc finger protein 316 OS=Homo sapiens GN=ZNF316 PE=1 SV=1	2.09163	2	2	2	1	1004	108.37	5.31	24.32	2
P23526	Adenosylhomocysteinase OS=Homo sapiens GN=AHCY PE=1 SV=4	2.08333	1	1	1	1	432	47.685	6.34	0	1
Q8NDN9	RCC1 and BTB domain-containing protein 1 OS=Homo sapiens GN=RCBTB1 PE=2 SV=1	2.07156	1	1	1	1	531	58.215	6.47	34.03	1
O14497	AT-rich interactive domain-containing protein 1A OS=Homo sapiens GN=ARID1A PE=1 SV=3	2.01313	3	3	2	1	2285	241.892	6.7	130.037	3
Q13835	Plakophilin-1 OS=Homo sapiens GN=PKP1 PE=1 SV=2	2.00803	1	1	1	1	747	82.808	9.13	49.11	1
Q92734	Protein TFG OS=Homo sapiens GN=TFG PE=1 SV=2	2	1	1	1	1	400	43.421	5.1	0	1
Q8NI36	WD repeat-containing protein 36 OS=Homo sapiens GN=WDR36 PE=1 SV=1	1.9979	1	2	1	1	951	105.255	7.53	0	1
Q92614	Unconventional myosin-XVIIIa OS=Homo sapiens GN=MYO18A PE=1 SV=3	1.99611	3	3	3	1	2054	232.971	6.3	55.63	3
Q12931	Heat shock protein 75 kDa, mitochondrial OS=Homo sapiens GN=TRAP1 PE=1 SV=3	1.98864	1	1	1	1	704	80.06	8.21	93.23	1
Q58FF6	Putative heat shock protein HSP 90-beta 4 OS=Homo sapiens GN=HSP90AB4P PE=5 SV=1	1.9802	1	1	1	1	505	58.228	4.73	56.49	1
P39656	Dolichyl-diphosphooligosaccharide--protein glycosyltransferase 48 kDa subunit OS=Homo sapiens GN=DDOST PE=1 SV=4	1.97368	1	1	1	1	456	50.769	6.55	29.94	1
Q86V48	Leucine zipper protein 1 OS=Homo sapiens GN=LUZP1 PE=1 SV=2	1.95167	1	1	1	1	1076	120.202	8.5	48.24	1
P13473	Lysosome-associated membrane glycoprotein 2 OS=Homo sapiens GN=LAMP2 PE=1 SV=2	1.95122	1	1	1	1	410	44.932	5.63	34.8	1
Q9UI26	Importin-11 OS=Homo sapiens GN=IPO11 PE=1 SV=1	1.94872	1	1	1	1	975	112.463	5.25	92.56	1
P49336	Cyclin-dependent kinase 8 OS=Homo sapiens GN=CDK8 PE=1 SV=1	1.93966	1	1	1	1	464	53.25	8.57	35.05	1
Q7Z3Y9	Keratin, type I cytoskeletal 26 OS=Homo sapiens GN=KRT26 PE=1 SV=2	1.92308	1	4	0	3	468	51.878	4.92	63.6333	1
P17661	Desmin OS=Homo sapiens GN=DES PE=1 SV=3	1.91489	1	1	1	1	470	53.503	5.27	16.91	1
Q9H9S3	Protein transport protein Sec61 subunit alpha isoform 2 OS=Homo sapiens GN=SEC61A2 PE=2 SV=3	1.89076	1	1	1	1	476	52.214	8.06	0	1
P78527	DNA-dependent protein kinase catalytic subunit OS=Homo sapiens GN=PRKDC PE=1 SV=3	1.88953	7	7	7	1	4128	468.788	7.12	87.25	7
Q8NI35	InaD-like protein OS=Homo sapiens GN=PATJ PE=1 SV=3	1.88784	1	2	1	1	1801	196.247	4.94	0	1
Q8TF47	Zinc finger protein 90 homolog OS=Homo sapiens GN=ZFP90 PE=1 SV=2	1.88679	1	1	1	1	636	72.985	8.06	42.49	1
Q6P1J9	Parafibromin OS=Homo sapiens GN=CDC73 PE=1 SV=1	1.88324	1	1	1	1	531	60.539	9.61	0	1
P30876	DNA-directed RNA polymerase II subunit RPB2 OS=Homo sapiens GN=POLR2B PE=1 SV=1	1.87394	2	2	2	1	1174	133.811	6.87	64.3697	2
Q14315	Filamin-C OS=Homo sapiens GN=FLNC PE=1 SV=3	1.87156	4	5	1	1	2725	290.841	5.97	123.61	4
O95197	Reticulon-3 OS=Homo sapiens GN=RTN3 PE=1 SV=2	1.84109	2	2	2	1	1032	112.541	4.96	33.61	2
Q9NWH9	SAFB-like transcription modulator OS=Homo sapiens GN=SLTM PE=1 SV=2	1.83752	1	1	1	1	1034	117.079	7.87	85.76	1
Q13895	Bystin OS=Homo sapiens GN=BYSL PE=1 SV=3	1.83066	1	1	1	1	437	49.57	8.12	71.04	1
Q5VUJ6	Leucine-rich repeat and calponin homology domain-containing protein 2 OS=Homo sapiens GN=LRCH2 PE=2 SV=2	1.83007	1	1	1	1	765	84.536	6.55	30	1
Q99456	Keratin, type I cytoskeletal 12 OS=Homo sapiens GN=KRT12 PE=1 SV=1	1.82186	1	1	0	4	494	53.478	4.78	31.36	1
Q16352	Alpha-internexin OS=Homo sapiens GN=INA PE=1 SV=2	1.80361	1	1	1	1	499	55.357	5.4	16.91	1
Q9HCE1	Putative helicase MOV-10 OS=Homo sapiens GN=MOV10 PE=1 SV=2	1.79462	1	1	1	1	1003	113.599	8.82	0	1
Q9BWU1	Cyclin-dependent kinase 19 OS=Homo sapiens GN=CDK19 PE=1 SV=1	1.79283	1	1	1	1	502	56.767	8.53	35.05	1
P33992	DNA replication licensing factor MCM5 OS=Homo sapiens GN=MCM5 PE=1 SV=5	1.77112	1	1	1	1	734	82.233	8.37	20.89	1
Q9NQC3	Reticulon-4 OS=Homo sapiens GN=RTN4 PE=1 SV=2	1.76174	2	2	2	1	1192	129.851	4.5	40.19	2
Q9NSB4	Keratin, type II cuticular Hb2 OS=Homo sapiens GN=KRT82 PE=3 SV=3	1.75439	2	2	0	0	513	56.616	6.74	51.77	2
P30825	High affinity cationic amino acid transporter 1 OS=Homo sapiens GN=SLC7A1 PE=1 SV=1	1.74881	1	1	1	1	629	67.594	5.43	0	1
Q14525	Keratin, type I cuticular Ha3-II OS=Homo sapiens GN=KRT33B PE=1 SV=3	1.73267	1	1	0	4	404	46.185	4.84	32.77	1
O14556	Glyceraldehyde-3-phosphate dehydrogenase, testis-specific OS=Homo sapiens GN=GAPDHS PE=1 SV=2	1.71569	1	1	1	1	408	44.473	8.19	33.92	1
P27918	Properdin OS=Homo sapiens GN=CFP PE=1 SV=2	1.70576	1	2	1	1	469	51.242	7.9	19.12	1
Q9UBM7	7-dehydrocholesterol reductase OS=Homo sapiens GN=DHCR7 PE=1 SV=1	1.68421	1	1	1	1	475	54.454	8.7	20.41	1
Q15323	Keratin, type I cuticular Ha1 OS=Homo sapiens GN=KRT31 PE=1 SV=3	1.68269	1	1	0	4	416	47.207	4.88	32.77	1
Q58FF7	Putative heat shock protein HSP 90-beta-3 OS=Homo sapiens GN=HSP90AB3P PE=5 SV=1	1.67504	1	1	1	1	597	68.282	4.79	56.49	1
P07196	Neurofilament light polypeptide OS=Homo sapiens GN=NEFL PE=1 SV=3	1.65746	1	1	1	1	543	61.479	4.65	16.91	1
O75369	Filamin-B OS=Homo sapiens GN=FLNB PE=1 SV=2	1.65257	4	4	1	1	2602	277.99	5.73	95.31	4
O75083	WD repeat-containing protein 1 OS=Homo sapiens GN=WDR1 PE=1 SV=4	1.65017	1	1	1	1	606	66.152	6.65	25.23	1
Q96FN4	Copine-2 OS=Homo sapiens GN=CPNE2 PE=1 SV=3	1.64234	1	1	1	1	548	61.151	6.07	34.77	1
Q9HC35	Echinoderm microtubule-associated protein-like 4 OS=Homo sapiens GN=EML4 PE=1 SV=3	1.63099	1	1	1	1	981	108.848	6.4	29.81	1
P05783	Keratin, type I cytoskeletal 18 OS=Homo sapiens GN=KRT18 PE=1 SV=2	1.62791	1	1	0	4	430	48.029	5.45	32.77	1
Q8IYJ1	Copine-9 OS=Homo sapiens GN=CPNE9 PE=1 SV=3	1.62749	1	1	1	1	553	61.825	5.34	34.77	1
O95741	Copine-6 OS=Homo sapiens GN=CPNE6 PE=1 SV=3	1.6158	1	1	1	1	557	61.952	5.52	34.77	1
Q96A23	Copine-4 OS=Homo sapiens GN=CPNE4 PE=1 SV=1	1.6158	1	1	1	1	557	62.355	6.33	34.77	1
Q9BYJ9	YTH domain-containing family protein 1 OS=Homo sapiens GN=YTHDF1 PE=1 SV=1	1.61002	1	1	1	1	559	60.836	8.79	25.7	1
Q86YQ8	Copine-8 OS=Homo sapiens GN=CPNE8 PE=1 SV=2	1.59574	1	1	1	1	564	63.068	5.96	34.77	1
Q14566	DNA replication licensing factor MCM6 OS=Homo sapiens GN=MCM6 PE=1 SV=1	1.58343	1	1	0	0	821	92.831	5.41	17.9	1
Q8WUQ7	Cactin OS=Homo sapiens GN=CACTIN PE=1 SV=3	1.58311	1	1	1	1	758	88.648	9.14	30.21	1
P35579	Myosin-9 OS=Homo sapiens GN=MYH9 PE=1 SV=4	1.58163	2	2	1	1	1960	226.392	5.6	139.48	2
P01024	Complement C3 OS=Homo sapiens GN=C3 PE=1 SV=2	1.56344	2	2	2	1	1663	187.03	6.4	67.89	2
Q99575	Ribonucleases P/MRP protein subunit POP1 OS=Homo sapiens GN=POP1 PE=1 SV=2	1.5625	1	1	1	1	1024	114.636	9.22	34.09	1
Q14532	Keratin, type I cuticular Ha2 OS=Homo sapiens GN=KRT32 PE=2 SV=3	1.5625	1	1	0	4	448	50.31	4.84	32.77	1
O76014	Keratin, type I cuticular Ha7 OS=Homo sapiens GN=KRT37 PE=3 SV=3	1.55902	1	1	0	4	449	49.715	4.96	32.77	1
Q9Y5A9	YTH domain-containing family protein 2 OS=Homo sapiens GN=YTHDF2 PE=1 SV=2	1.5544	1	1	1	1	579	62.296	8.79	25.7	1
Q92764	Keratin, type I cuticular Ha5 OS=Homo sapiens GN=KRT35 PE=2 SV=5	1.53846	1	1	0	4	455	50.329	4.91	32.77	1
Q7Z739	YTH domain-containing family protein 3 OS=Homo sapiens GN=YTHDF3 PE=1 SV=1	1.53846	1	1	1	1	585	63.822	9.04	25.7	1
O76015	Keratin, type I cuticular Ha8 OS=Homo sapiens GN=KRT38 PE=1 SV=3	1.53509	1	1	0	4	456	50.447	4.84	32.77	1
Q659C4	La-related protein 1B OS=Homo sapiens GN=LARP1B PE=1 SV=2	1.53173	1	2	1	1	914	105.257	7.61	79.14	1
O15294	UDP-N-acetylglucosamine--peptide N-acetylglucosaminyltransferase 110 kDa subunit OS=Homo sapiens GN=OGT PE=1 SV=3	1.52964	1	1	1	1	1046	116.85	6.7	0	1
P51532	Transcription activator BRG1 OS=Homo sapiens GN=SMARCA4 PE=1 SV=2	1.51791	2	2	2	1	1647	184.53	7.88	52.58	2
Q9HCH3	Copine-5 OS=Homo sapiens GN=CPNE5 PE=1 SV=2	1.51771	1	1	1	1	593	65.692	5.99	34.77	1
P13639	Elongation factor 2 OS=Homo sapiens GN=EEF2 PE=1 SV=4	1.51515	1	1	1	1	858	95.277	6.83	35.51	1
Q9UKA9	Polypyrimidine tract-binding protein 2 OS=Homo sapiens GN=PTBP2 PE=1 SV=1	1.50659	1	1	1	1	531	57.455	8.66	32.88	1
Q9NSB2	Keratin, type II cuticular Hb4 OS=Homo sapiens GN=KRT84 PE=2 SV=2	1.5	2	2	0	5	600	64.801	7.56	51.77	2
O76013	Keratin, type I cuticular Ha6 OS=Homo sapiens GN=KRT36 PE=2 SV=1	1.49893	1	1	0	4	467	52.214	4.94	32.77	1
Q7Z460	CLIP-associating protein 1 OS=Homo sapiens GN=CLASP1 PE=1 SV=1	1.49545	2	2	2	1	1538	169.346	9.03	45.31	2
P20648	Potassium-transporting ATPase alpha chain 1 OS=Homo sapiens GN=ATP4A PE=2 SV=5	1.44928	1	1	1	1	1035	114.045	5.81	83.99	1
O95758	Polypyrimidine tract-binding protein 3 OS=Homo sapiens GN=PTBP3 PE=1 SV=2	1.44928	1	1	1	1	552	59.652	9.04	32.88	1
P22681	E3 ubiquitin-protein ligase CBL OS=Homo sapiens GN=CBL PE=1 SV=2	1.43488	1	1	1	1	906	99.569	6.54	17.84	1
Q9UBL6	Copine-7 OS=Homo sapiens GN=CPNE7 PE=1 SV=1	1.4218	1	1	1	1	633	70.249	6.38	34.77	1
P07384	Calpain-1 catalytic subunit OS=Homo sapiens GN=CAPN1 PE=1 SV=1	1.40056	1	1	1	1	714	81.838	5.67	58.63	1
Q01433	AMP deaminase 2 OS=Homo sapiens GN=AMPD2 PE=1 SV=2	1.36519	1	1	1	1	879	100.624	6.93	43.43	1
Q9UPQ9	Trinucleotide repeat-containing gene 6B protein OS=Homo sapiens GN=TNRC6B PE=1 SV=4	1.36388	2	2	2	1	1833	193.883	6.76	125.97	2
P54136	Arginine--tRNA ligase, cytoplasmic OS=Homo sapiens GN=RARS PE=1 SV=2	1.36364	1	1	1	1	660	75.331	6.68	40.75	1
Q9Y2W1	Thyroid hormone receptor-associated protein 3 OS=Homo sapiens GN=THRAP3 PE=1 SV=2	1.36126	1	1	1	1	955	108.601	10.15	14.47	1
Q96JM3	Chromosome alignment-maintaining phosphoprotein 1 OS=Homo sapiens GN=CHAMP1 PE=1 SV=2	1.35468	1	1	1	1	812	89.043	8.44	0	1
Q9C0J8	pre-mRNA 3' end processing protein WDR33 OS=Homo sapiens GN=WDR33 PE=1 SV=2	1.34731	1	1	1	1	1336	145.799	9.17	0	1
Q14119	Vascular endothelial zinc finger 1 OS=Homo sapiens GN=VEZF1 PE=1 SV=2	1.34357	1	1	1	1	521	56.895	9.52	0	1
Q13617	Cullin-2 OS=Homo sapiens GN=CUL2 PE=1 SV=2	1.34228	1	1	1	1	745	86.927	6.92	61.99	1
Q9Y3T9	Nucleolar complex protein 2 homolog OS=Homo sapiens GN=NOC2L PE=1 SV=4	1.33511	1	1	1	1	749	84.866	5.62	23.26	1
Q96G01	Protein bicaudal D homolog 1 OS=Homo sapiens GN=BICD1 PE=1 SV=3	1.33333	1	1	1	1	975	110.682	5.81	0	1
Q13433	Zinc transporter ZIP6 OS=Homo sapiens GN=SLC39A6 PE=1 SV=3	1.3245	1	1	1	1	755	84.993	6.95	0	1
Q9UKF6	Cleavage and polyadenylation specificity factor subunit 3 OS=Homo sapiens GN=CPSF3 PE=1 SV=1	1.31579	1	1	1	1	684	77.436	5.6	0	1
Q5M775	Cytospin-B OS=Homo sapiens GN=SPECC1 PE=1 SV=1	1.31086	1	1	0	0	1068	118.512	6.7	33.52	1
Q96K58	Zinc finger protein 668 OS=Homo sapiens GN=ZNF668 PE=1 SV=3	1.29241	1	1	1	1	619	67.846	8.9	0	1
P19338	Nucleolin OS=Homo sapiens GN=NCL PE=1 SV=3	1.26761	1	1	1	1	710	76.568	4.7	48.88	1
Q5VWQ0	Round spermatid basic protein 1 OS=Homo sapiens GN=RSBN1 PE=1 SV=2	1.24688	1	1	1	1	802	90.015	8.6	0	1
P51784	Ubiquitin carboxyl-terminal hydrolase 11 OS=Homo sapiens GN=USP11 PE=1 SV=3	1.24611	1	1	1	1	963	109.747	5.45	25.52	1
Q15029	116 kDa U5 small nuclear ribonucleoprotein component OS=Homo sapiens GN=EFTUD2 PE=1 SV=1	1.23457	1	1	1	1	972	109.366	5	42.6	1
P49750	YLP motif-containing protein 1 OS=Homo sapiens GN=YLPM1 PE=1 SV=3	1.23014	1	1	1	1	1951	219.849	6.57	26.72	1
P22735	Protein-glutamine gamma-glutamyltransferase K OS=Homo sapiens GN=TGM1 PE=1 SV=4	1.22399	1	1	1	1	817	89.73	6.04	26.02	1
P35749	Myosin-11 OS=Homo sapiens GN=MYH11 PE=1 SV=3	1.21704	2	2	1	1	1972	227.199	5.5	83.8	2
Q15058	Kinesin-like protein KIF14 OS=Homo sapiens GN=KIF14 PE=1 SV=1	1.21359	2	2	2	1	1648	186.375	7.91	64.77	2
P49792	E3 SUMO-protein ligase RanBP2 OS=Homo sapiens GN=RANBP2 PE=1 SV=2	1.20968	3	3	3	1	3224	357.974	6.2	58.7795	3
Q15269	Periodic tryptophan protein 2 homolog OS=Homo sapiens GN=PWP2 PE=2 SV=2	1.19695	1	1	1	1	919	102.387	6.15	32.38	1
O60518	Ran-binding protein 6 OS=Homo sapiens GN=RANBP6 PE=1 SV=2	1.17647	1	1	1	1	1105	124.633	5.01	33.81	1
Q14203	Dynactin subunit 1 OS=Homo sapiens GN=DCTN1 PE=1 SV=3	1.17371	1	1	1	1	1278	141.607	5.81	19.43	1
Q9HAU0	Pleckstrin homology domain-containing family A member 5 OS=Homo sapiens GN=PLEKHA5 PE=1 SV=1	1.16487	1	1	1	1	1116	127.385	7.53	0	1
O75976	Carboxypeptidase D OS=Homo sapiens GN=CPD PE=1 SV=2	1.15942	1	1	1	1	1380	152.835	6.05	33.22	1
Q70CQ2	Ubiquitin carboxyl-terminal hydrolase 34 OS=Homo sapiens GN=USP34 PE=1 SV=2	1.15623	3	3	3	1	3546	403.973	5.82	60.51	3
O95935	T-box transcription factor TBX18 OS=Homo sapiens GN=TBX18 PE=1 SV=3	1.15321	1	1	0	0	607	64.712	8.78	25.77	1
Q8WUM4	Programmed cell death 6-interacting protein OS=Homo sapiens GN=PDCD6IP PE=1 SV=1	1.15207	1	1	1	1	868	95.963	6.52	33.96	1
Q9BXP5	Serrate RNA effector molecule homolog OS=Homo sapiens GN=SRRT PE=1 SV=1	1.14155	1	1	1	1	876	100.604	5.96	27.17	1
O95263	High affinity cAMP-specific and IBMX-insensitive 3',5'-cyclic phosphodiesterase 8B OS=Homo sapiens GN=PDE8B PE=1 SV=2	1.12994	1	3	1	1	885	98.916	6.83	13.01	1
P56192	Methionine--tRNA ligase, cytoplasmic OS=Homo sapiens GN=MARS PE=1 SV=2	1.11111	1	1	1	1	900	101.052	6.16	48.72	1
Q86VP6	Cullin-associated NEDD8-dissociated protein 1 OS=Homo sapiens GN=CAND1 PE=1 SV=2	1.05691	1	1	1	1	1230	136.289	5.78	35.97	1
Q9Y5B9	FACT complex subunit SPT16 OS=Homo sapiens GN=SUPT16H PE=1 SV=1	1.05062	1	1	1	1	1047	119.838	5.66	0	1
O95625	Zinc finger and BTB domain-containing protein 11 OS=Homo sapiens GN=ZBTB11 PE=1 SV=2	1.04463	1	1	1	1	1053	119.308	8.66	0	1
Q16799	Reticulon-1 OS=Homo sapiens GN=RTN1 PE=1 SV=1	1.03093	1	1	1	1	776	83.566	4.69	0	1
Q9NRR4	Ribonuclease 3 OS=Homo sapiens GN=DROSHA PE=1 SV=2	1.01892	1	1	1	1	1374	159.214	7.87	17.9	1
Q9HBE1	POZ-, AT hook-, and zinc finger-containing protein 1 OS=Homo sapiens GN=PATZ1 PE=1 SV=1	1.01892	1	1	1	1	687	74.013	8.35	0	1
O94832	Unconventional myosin-Id OS=Homo sapiens GN=MYO1D PE=1 SV=2	0.994036	1	1	1	1	1006	116.129	9.39	15.92	1
P07197	Neurofilament medium polypeptide OS=Homo sapiens GN=NEFM PE=1 SV=3	0.982533	1	1	1	1	916	102.411	4.91	16.91	1
Q9H9J4	Ubiquitin carboxyl-terminal hydrolase 42 OS=Homo sapiens GN=USP42 PE=1 SV=3	0.981873	1	1	1	1	1324	145.302	8.63	29.37	1
Q8N4C8	Misshapen-like kinase 1 OS=Homo sapiens GN=MINK1 PE=1 SV=2	0.975976	1	1	1	1	1332	149.729	7.85	33.36	1
O00291	Huntingtin-interacting protein 1 OS=Homo sapiens GN=HIP1 PE=1 SV=5	0.96432	1	1	1	1	1037	116.148	5.3	0	1
Q9UKE5	TRAF2 and NCK-interacting protein kinase OS=Homo sapiens GN=TNIK PE=1 SV=1	0.955882	1	1	1	1	1360	154.848	7.17	33.36	1
Q96ST3	Paired amphipathic helix protein Sin3a OS=Homo sapiens GN=SIN3A PE=1 SV=2	0.942655	1	1	1	1	1273	145.085	7.25	55.21	1
Q7Z6Z7	E3 ubiquitin-protein ligase HUWE1 OS=Homo sapiens GN=HUWE1 PE=1 SV=3	0.914495	3	3	3	1	4374	481.589	5.22	114.213	3
Q9Y2J4	Angiomotin-like protein 2 OS=Homo sapiens GN=AMOTL2 PE=1 SV=3	0.898588	1	1	1	1	779	85.713	7.3	40.59	1
Q9UIQ6	Leucyl-cystinyl aminopeptidase OS=Homo sapiens GN=LNPEP PE=1 SV=3	0.878049	1	1	1	1	1025	117.274	5.73	19.49	1
P12036	Neurofilament heavy polypeptide OS=Homo sapiens GN=NEFH PE=1 SV=4	0.877193	1	1	1	1	1026	112.411	6.18	16.91	1
P55196	Afadin OS=Homo sapiens GN=AFDN PE=1 SV=3	0.877193	1	1	1	1	1824	206.676	6.47	0	1
O60231	Putative pre-mRNA-splicing factor ATP-dependent RNA helicase DHX16 OS=Homo sapiens GN=DHX16 PE=1 SV=2	0.864553	1	1	1	1	1041	119.189	6.8	43.81	1
Q8NF50	Dedicator of cytokinesis protein 8 OS=Homo sapiens GN=DOCK8 PE=1 SV=3	0.857551	1	1	1	1	2099	238.377	6.87	41.95	1
Q12873	Chromodomain-helicase-DNA-binding protein 3 OS=Homo sapiens GN=CHD3 PE=1 SV=3	0.85	1	2	1	1	2000	226.45	7.3	57.41	1
Q5THK1	Protein PRR14L OS=Homo sapiens GN=PRR14L PE=1 SV=1	0.83682	1	1	1	1	2151	237.15	6.33	0	1
Q5T5U3	Rho GTPase-activating protein 21 OS=Homo sapiens GN=ARHGAP21 PE=1 SV=1	0.817578	1	1	1	1	1957	217.198	7.8	60.16	1
P33991	DNA replication licensing factor MCM4 OS=Homo sapiens GN=MCM4 PE=1 SV=5	0.811124	1	1	1	1	863	96.498	6.74	18.29	1
Q9Y2I1	Nischarin OS=Homo sapiens GN=NISCH PE=1 SV=3	0.797872	1	1	1	1	1504	166.524	5.14	95.18	1
Q5TCX8	Mitogen-activated protein kinase kinase kinase MLK4 OS=Homo sapiens GN=MLK4 PE=1 SV=1	0.772201	1	1	1	1	1036	113.885	8.73	0	1
Q96RT7	Gamma-tubulin complex component 6 OS=Homo sapiens GN=TUBGCP6 PE=1 SV=3	0.769654	1	1	1	1	1819	200.372	6.32	18.93	1
Q7L2E3	Putative ATP-dependent RNA helicase DHX30 OS=Homo sapiens GN=DHX30 PE=1 SV=1	0.753769	1	1	0	0	1194	133.855	8.78	37.62	1
Q14562	ATP-dependent RNA helicase DHX8 OS=Homo sapiens GN=DHX8 PE=1 SV=1	0.737705	1	1	1	1	1220	139.227	8.32	43.81	1
O94979	Protein transport protein Sec31A OS=Homo sapiens GN=SEC31A PE=1 SV=3	0.737705	1	1	1	1	1220	132.931	6.89	13.63	1
Q93009	Ubiquitin carboxyl-terminal hydrolase 7 OS=Homo sapiens GN=USP7 PE=1 SV=2	0.725953	1	1	1	1	1102	128.22	5.55	49.89	1
Q8NB49	Phospholipid-transporting ATPase IG OS=Homo sapiens GN=ATP11C PE=1 SV=3	0.706714	1	1	1	1	1132	129.394	6.67	0	1
P98196	Probable phospholipid-transporting ATPase IH OS=Homo sapiens GN=ATP11A PE=1 SV=3	0.705467	1	1	1	1	1134	129.672	6.6	0	1
Q9Y2G3	Probable phospholipid-transporting ATPase IF OS=Homo sapiens GN=ATP11B PE=1 SV=2	0.679694	1	1	1	1	1177	134.104	6.96	0	1
P51531	Probable global transcription activator SNF2L2 OS=Homo sapiens GN=SMARCA2 PE=1 SV=2	0.628931	1	1	1	1	1590	181.166	7.2	18.34	1
Q8NI27	THO complex subunit 2 OS=Homo sapiens GN=THOC2 PE=1 SV=2	0.627746	1	1	1	1	1593	182.659	8.44	40.28	1
P42345	Serine/threonine-protein kinase mTOR OS=Homo sapiens GN=MTOR PE=1 SV=1	0.627697	1	1	1	1	2549	288.707	7.17	49.32	1
Q9H583	HEAT repeat-containing protein 1 OS=Homo sapiens GN=HEATR1 PE=1 SV=3	0.559701	1	1	1	1	2144	242.215	6.54	27.36	1
Q5JU85	IQ motif and SEC7 domain-containing protein 2 OS=Homo sapiens GN=IQSEC2 PE=1 SV=1	0.541272	1	1	1	1	1478	161.637	8.56	35.28	1
Q6GYQ0	Ral GTPase-activating protein subunit alpha-1 OS=Homo sapiens GN=RALGAPA1 PE=1 SV=1	0.540275	1	1	1	1	2036	229.686	6.19	0	1
Q9NU22	Midasin OS=Homo sapiens GN=MDN1 PE=1 SV=2	0.536097	1	3	1	1	5596	632.42	5.68	32.62	1
Q9C0A0	Contactin-associated protein-like 4 OS=Homo sapiens GN=CNTNAP4 PE=1 SV=3	0.535168	1	1	1	1	1308	145.182	6.68	32.22	1
O60292	Signal-induced proliferation-associated 1-like protein 3 OS=Homo sapiens GN=SIPA1L3 PE=1 SV=3	0.505334	1	1	1	1	1781	194.49	8.32	22.18	1
Q9H254	Spectrin beta chain, non-erythrocytic 4 OS=Homo sapiens GN=SPTBN4 PE=1 SV=2	0.429017	1	2	1	1	2564	288.808	6.01	78.84	1
Q8TDI0	Chromodomain-helicase-DNA-binding protein 5 OS=Homo sapiens GN=CHD5 PE=1 SV=1	0.409417	1	1	1	1	1954	222.909	6.15	38.04	1
A6NKT7	RanBP2-like and GRIP domain-containing protein 3 OS=Homo sapiens GN=RGPD3 PE=3 SV=2	0.39818	1	1	1	1	1758	197.364	6.33	34.71	1
Q7Z3J3	RanBP2-like and GRIP domain-containing protein 4 OS=Homo sapiens GN=RGPD4 PE=2 SV=3	0.39818	1	1	1	1	1758	197.166	6.27	34.71	1
O14715	RANBP2-like and GRIP domain-containing protein 8 OS=Homo sapiens GN=RGPD8 PE=1 SV=2	0.396601	1	1	1	1	1765	198.869	6.49	34.71	1
Q99666	RANBP2-like and GRIP domain-containing protein 5/6 OS=Homo sapiens GN=RGPD5 PE=1 SV=3	0.396601	1	1	1	1	1765	198.8	6.42	34.71	1
Q01484	Ankyrin-2 OS=Homo sapiens GN=ANK2 PE=1 SV=4	0.30326	1	1	1	1	3957	433.448	5.14	0	1
Q709C8	Vacuolar protein sorting-associated protein 13C OS=Homo sapiens GN=VPS13C PE=1 SV=1	0.213163	1	1	1	1	3753	422.124	6.83	15.61	1
Q8WZ42	Titin OS=Homo sapiens GN=TTN PE=1 SV=4	0.0203785	1	32	1	1	34350	3813.65	6.35	33.2938	1

## Sheet: NleE K219Azi(2)
Accession	Description	Coverage	# Peptides	# PSMs	# Unique Peptides	# Protein Groups	# AAs	MW [kDa]	calc. pI	Score Mascot	# Peptides Mascot
Q15233	Non-POU domain-containing octamer-binding protein OS=Homo sapiens GN=NONO PE=1 SV=4	72.8238	42	291	40	1	471	54.197	8.95	5870.14	42
Q7Z417	Nuclear fragile X mental retardation-interacting protein 2 OS=Homo sapiens GN=NUFIP2 PE=1 SV=1	51.9424	28	97	28	1	695	76.075	8.7	3591.13	28
P04264	Keratin, type II cytoskeletal 1 OS=Homo sapiens GN=KRT1 PE=1 SV=6	55.4348	41	104	35	1	644	65.999	8.12	3381.18	41
Q99700	Ataxin-2 OS=Homo sapiens GN=ATXN2 PE=1 SV=2	33.8157	34	89	34	1	1313	140.196	9.57	3088.45	34
P35908	Keratin, type II cytoskeletal 2 epidermal OS=Homo sapiens GN=KRT2 PE=1 SV=2	65.7277	33	73	25	1	639	65.393	8	2958.69	33
Q8WWM7	Ataxin-2-like protein OS=Homo sapiens GN=ATXN2L PE=1 SV=2	46.2326	43	97	43	1	1075	113.304	8.59	2854.59	43
P13645	Keratin, type I cytoskeletal 10 OS=Homo sapiens GN=KRT10 PE=1 SV=6	46.0616	29	83	25	1	584	58.792	5.21	2834.42	29
P35527	Keratin, type I cytoskeletal 9 OS=Homo sapiens GN=KRT9 PE=1 SV=3	70.626	32	64	31	1	623	62.027	5.24	2571.81	32
Q7L2J0	7SK snRNA methylphosphate capping enzyme OS=Homo sapiens GN=MEPCE PE=1 SV=1	65.1669	36	100	36	1	689	74.31	9.57	2324.89	36
Q4VCS5	Angiomotin OS=Homo sapiens GN=AMOT PE=1 SV=1	47.417	35	125	35	1	1084	118.013	7.64	1947.95	35
P14866	Heterogeneous nuclear ribonucleoprotein L OS=Homo sapiens GN=HNRNPL PE=1 SV=2	50.764	20	48	20	1	589	64.092	8.22	1704.94	20
P11387	DNA topoisomerase 1 OS=Homo sapiens GN=TOP1 PE=1 SV=2	48.1046	44	77	44	1	765	90.669	9.31	1701.57	44
P46776	60S ribosomal protein L27a OS=Homo sapiens GN=RPL27A PE=1 SV=2	46.6216	10	63	10	1	148	16.551	11	1547.37	10
Q9UG63	ATP-binding cassette sub-family F member 2 OS=Homo sapiens GN=ABCF2 PE=1 SV=2	51.8459	31	69	31	1	623	71.245	7.37	1505.68	31
O60563	Cyclin-T1 OS=Homo sapiens GN=CCNT1 PE=1 SV=1	40.4959	20	47	18	1	726	80.634	8.78	1476.72	20
Q13523	Serine/threonine-protein kinase PRP4 homolog OS=Homo sapiens GN=PRPF4B PE=1 SV=3	31.4796	30	44	30	1	1007	116.916	10.26	1421	30
O43143	Pre-mRNA-splicing factor ATP-dependent RNA helicase DHX15 OS=Homo sapiens GN=DHX15 PE=1 SV=2	42.6415	30	52	29	1	795	90.875	7.46	1399.66	30
Q96EV2	RNA-binding protein 33 OS=Homo sapiens GN=RBM33 PE=1 SV=3	34.1026	25	47	25	1	1170	129.906	6.93	1349.74	25
Q86XP3	ATP-dependent RNA helicase DDX42 OS=Homo sapiens GN=DDX42 PE=1 SV=1	46.0554	27	40	27	1	938	102.912	7.02	1333.26	27
P42694	Probable helicase with zinc finger domain OS=Homo sapiens GN=HELZ PE=1 SV=2	20.4943	31	38	31	1	1942	218.833	7.42	1122.06	31
Q14151	Scaffold attachment factor B2 OS=Homo sapiens GN=SAFB2 PE=1 SV=1	34.6275	29	39	18	1	953	107.408	6.16	1110.35	29
Q6P1X5	Transcription initiation factor TFIID subunit 2 OS=Homo sapiens GN=TAF2 PE=1 SV=3	32.7773	32	41	32	1	1199	136.883	8.19	1108.3	32
Q96QC0	Serine/threonine-protein phosphatase 1 regulatory subunit 10 OS=Homo sapiens GN=PPP1R10 PE=1 SV=1	33.617	24	40	24	1	940	98.996	9.17	1064.58	24
P23246	Splicing factor, proline- and glutamine-rich OS=Homo sapiens GN=SFPQ PE=1 SV=2	35.5021	24	47	23	1	707	76.102	9.44	1051.13	24
Q9Y2X9	Zinc finger protein 281 OS=Homo sapiens GN=ZNF281 PE=1 SV=1	35.9777	19	29	19	1	895	96.855	8.48	1043.83	19
Q7Z2T5	TRMT1-like protein OS=Homo sapiens GN=TRMT1L PE=1 SV=2	45.0205	24	37	24	1	733	81.695	7.88	1043	24
Q8IWX8	Calcium homeostasis endoplasmic reticulum protein OS=Homo sapiens GN=CHERP PE=1 SV=3	33.7336	21	51	21	1	916	103.637	9.04	1040.51	21
Q8IWS0	PHD finger protein 6 OS=Homo sapiens GN=PHF6 PE=1 SV=1	60.274	19	30	19	1	365	41.264	8.68	966.222	19
Q8NFD5	AT-rich interactive domain-containing protein 1B OS=Homo sapiens GN=ARID1B PE=1 SV=2	25.0894	29	45	29	1	2236	235.974	6.73	936.029	29
Q9HCN8	Stromal cell-derived factor 2-like protein 1 OS=Homo sapiens GN=SDF2L1 PE=1 SV=2	43.8914	5	14	5	1	221	23.584	7.03	891.293	5
P13647	Keratin, type II cytoskeletal 5 OS=Homo sapiens GN=KRT5 PE=1 SV=3	34.0678	21	33	11	1	590	62.34	7.74	873.11	21
P02533	Keratin, type I cytoskeletal 14 OS=Homo sapiens GN=KRT14 PE=1 SV=4	42.161	20	32	9	1	472	51.529	5.16	870.465	20
Q9BZE4	Nucleolar GTP-binding protein 1 OS=Homo sapiens GN=GTPBP4 PE=1 SV=3	39.9054	21	28	21	1	634	73.918	9.5	836.681	21
Q15427	Splicing factor 3B subunit 4 OS=Homo sapiens GN=SF3B4 PE=1 SV=1	22.8774	6	20	6	1	424	44.357	8.56	795.57	6
P68363	Tubulin alpha-1B chain OS=Homo sapiens GN=TUBA1B PE=1 SV=1	48.337	16	22	2	1	451	50.12	5.06	793.906	16
P39023	60S ribosomal protein L3 OS=Homo sapiens GN=RPL3 PE=1 SV=2	39.7022	15	28	15	1	403	46.08	10.18	783.902	15
O75400	Pre-mRNA-processing factor 40 homolog A OS=Homo sapiens GN=PRPF40A PE=1 SV=2	21.0031	17	28	17	1	957	108.737	7.56	776.809	17
P32121	Beta-arrestin-2 OS=Homo sapiens GN=ARRB2 PE=1 SV=2	49.3888	18	26	17	1	409	46.077	7.69	772.459	18
Q12986	Transcriptional repressor NF-X1 OS=Homo sapiens GN=NFX1 PE=1 SV=2	20.4464	16	19	16	1	1120	124.312	8.24	766.705	16
P61313	60S ribosomal protein L15 OS=Homo sapiens GN=RPL15 PE=1 SV=2	44.1176	10	34	10	1	204	24.131	11.62	764.854	10
Q9UKJ3	G patch domain-containing protein 8 OS=Homo sapiens GN=GPATCH8 PE=1 SV=2	19.1744	20	25	20	1	1502	164.098	8.66	730.188	20
O00257	E3 SUMO-protein ligase CBX4 OS=Homo sapiens GN=CBX4 PE=1 SV=3	33.9286	17	26	17	1	560	61.329	9.36	730.132	17
Q8NCA5	Protein FAM98A OS=Homo sapiens GN=FAM98A PE=1 SV=1	34.6821	9	14	9	1	519	55.366	9.03	714.792	9
P08779	Keratin, type I cytoskeletal 16 OS=Homo sapiens GN=KRT16 PE=1 SV=4	37.6321	16	21	7	1	473	51.236	5.05	702.197	16
Q8NB50	Zinc finger protein 62 homolog OS=Homo sapiens GN=ZFP62 PE=1 SV=3	26.2222	18	23	18	1	900	102.445	9.04	691.009	18
P07437	Tubulin beta chain OS=Homo sapiens GN=TUBB PE=1 SV=2	47.0721	14	19	4	1	444	49.639	4.89	686.402	14
Q71U36	Tubulin alpha-1A chain OS=Homo sapiens GN=TUBA1A PE=1 SV=1	45.2328	15	20	1	1	451	50.104	5.06	677.674	15
O95625	Zinc finger and BTB domain-containing protein 11 OS=Homo sapiens GN=ZBTB11 PE=1 SV=2	15.6695	14	20	14	1	1053	119.308	8.66	668.113	14
P02538	Keratin, type II cytoskeletal 6A OS=Homo sapiens GN=KRT6A PE=1 SV=3	31.0284	19	28	3	1	564	60.008	8	666.8	19
O60583	Cyclin-T2 OS=Homo sapiens GN=CCNT2 PE=1 SV=2	34.9315	15	20	13	1	730	80.979	8.92	660.8	15
Q9BQE3	Tubulin alpha-1C chain OS=Homo sapiens GN=TUBA1C PE=1 SV=1	39.4209	14	20	2	0	449	49.863	5.1	655.654	14
Q9H5H4	Zinc finger protein 768 OS=Homo sapiens GN=ZNF768 PE=1 SV=2	36.1111	17	23	17	1	540	60.191	7.97	649.333	17
Q9Y6Q3	Zinc finger protein 37 homolog OS=Homo sapiens GN=ZFP37 PE=2 SV=3	35.7143	18	31	18	1	630	71.164	9.09	634.973	18
P48668	Keratin, type II cytoskeletal 6C OS=Homo sapiens GN=KRT6C PE=1 SV=3	31.0284	19	28	3	0	564	59.988	8	631.406	19
Q9P2N5	RNA-binding protein 27 OS=Homo sapiens GN=RBM27 PE=1 SV=2	16.9811	16	20	16	1	1060	118.645	9.19	619.188	16
O94842	TOX high mobility group box family member 4 OS=Homo sapiens GN=TOX4 PE=1 SV=1	34.6216	13	19	13	1	621	66.153	5.06	617.99	13
Q99676	Zinc finger protein 184 OS=Homo sapiens GN=ZNF184 PE=1 SV=4	24.9001	15	24	14	1	751	86.119	8.07	611.545	15
Q99613	Eukaryotic translation initiation factor 3 subunit C OS=Homo sapiens GN=EIF3C PE=1 SV=1	15.0055	11	17	11	1	913	105.278	5.68	611.354	11
Q5VWQ0	Round spermatid basic protein 1 OS=Homo sapiens GN=RSBN1 PE=1 SV=2	27.9302	16	23	16	1	802	90.015	8.6	607.298	16
Q8NDT2	Putative RNA-binding protein 15B OS=Homo sapiens GN=RBM15B PE=1 SV=3	23.2584	14	23	14	1	890	97.147	9.85	589.59	14
O14646	Chromodomain-helicase-DNA-binding protein 1 OS=Homo sapiens GN=CHD1 PE=1 SV=2	17.4854	23	29	18	1	1710	196.567	7.14	587.295	23
P22314	Ubiquitin-like modifier-activating enzyme 1 OS=Homo sapiens GN=UBA1 PE=1 SV=3	22.4008	19	21	19	1	1058	117.774	5.76	579.95	19
P04259	Keratin, type II cytoskeletal 6B OS=Homo sapiens GN=KRT6B PE=1 SV=5	27.6596	17	25	2	1	564	60.03	8	575.543	17
Q99575	Ribonucleases P/MRP protein subunit POP1 OS=Homo sapiens GN=POP1 PE=1 SV=2	16.9922	15	18	15	1	1024	114.636	9.22	574.754	15
P68371	Tubulin beta-4B chain OS=Homo sapiens GN=TUBB4B PE=1 SV=1	40.2247	13	16	3	1	445	49.799	4.89	567.919	13
Q9NYV4	Cyclin-dependent kinase 12 OS=Homo sapiens GN=CDK12 PE=1 SV=2	14.4295	14	18	14	1	1490	164.054	9.44	561.746	14
P13639	Elongation factor 2 OS=Homo sapiens GN=EEF2 PE=1 SV=4	23.31	19	23	19	1	858	95.277	6.83	554.784	19
Q6ZN55	Zinc finger protein 574 OS=Homo sapiens GN=ZNF574 PE=1 SV=2	14.6205	10	14	10	1	896	98.837	8.07	546.681	10
Q9Y580	RNA-binding protein 7 OS=Homo sapiens GN=RBM7 PE=1 SV=1	62.782	11	20	11	1	266	30.485	9.57	543.006	11
P57071	PR domain zinc finger protein 15 OS=Homo sapiens GN=PRDM15 PE=1 SV=4	14.4658	19	25	19	1	1507	169.161	8.24	542.394	19
P62917	60S ribosomal protein L8 OS=Homo sapiens GN=RPL8 PE=1 SV=2	56.4202	14	29	14	1	257	28.007	11.03	540.845	14
B5ME19	Eukaryotic translation initiation factor 3 subunit C-like protein OS=Homo sapiens GN=EIF3CL PE=3 SV=1	13.2385	10	15	10	1	914	105.407	5.64	531.76	10
Q9BU76	Multiple myeloma tumor-associated protein 2 OS=Homo sapiens GN=MMTAG2 PE=1 SV=1	44.8669	12	18	12	1	263	29.394	10.02	528.81	12
P00918	Carbonic anhydrase 2 OS=Homo sapiens GN=CA2 PE=1 SV=2	50.3846	9	19	9	1	260	29.228	7.4	527.118	9
Q13748	Tubulin alpha-3C/D chain OS=Homo sapiens GN=TUBA3C PE=1 SV=3	38.2222	12	16	1	1	450	49.928	5.1	521.006	12
Q9H9J4	Ubiquitin carboxyl-terminal hydrolase 42 OS=Homo sapiens GN=USP42 PE=1 SV=3	22.9607	20	22	20	1	1324	145.302	8.63	517.919	20
P11142	Heat shock cognate 71 kDa protein OS=Homo sapiens GN=HSPA8 PE=1 SV=1	24.3034	12	16	10	1	646	70.854	5.52	515.405	12
Q9BTA9	WW domain-containing adapter protein with coiled-coil OS=Homo sapiens GN=WAC PE=1 SV=3	33.2303	10	12	10	1	647	70.681	9.45	511.691	10
P68366	Tubulin alpha-4A chain OS=Homo sapiens GN=TUBA4A PE=1 SV=1	38.8393	13	17	2	1	448	49.892	5.06	504.764	13
Q12788	Transducin beta-like protein 3 OS=Homo sapiens GN=TBL3 PE=1 SV=2	21.6584	13	18	13	1	808	88.978	6.9	503.848	13
Q13885	Tubulin beta-2A chain OS=Homo sapiens GN=TUBB2A PE=1 SV=1	34.8315	11	15	2	0	445	49.875	4.89	482.781	11
Q9BVA1	Tubulin beta-2B chain OS=Homo sapiens GN=TUBB2B PE=1 SV=1	34.8315	11	15	2	0	445	49.921	4.89	482.781	11
Q9NX05	Constitutive coactivator of PPAR-gamma-like protein 2 OS=Homo sapiens GN=FAM120C PE=2 SV=3	20.1642	17	19	17	1	1096	120.511	9.03	479.059	17
Q15776	Zinc finger protein with KRAB and SCAN domains 8 OS=Homo sapiens GN=ZKSCAN8 PE=1 SV=2	30.9689	12	21	11	1	578	65.775	7.39	473.401	12
Q75N03	E3 ubiquitin-protein ligase Hakai OS=Homo sapiens GN=CBLL1 PE=1 SV=1	37.8819	13	16	13	1	491	54.484	8.29	469.257	13
Q9BQG0	Myb-binding protein 1A OS=Homo sapiens GN=MYBBP1A PE=1 SV=2	14.4578	13	14	13	1	1328	148.762	9.28	468.006	13
P08238	Heat shock protein HSP 90-beta OS=Homo sapiens GN=HSP90AB1 PE=1 SV=4	22.3757	14	17	7	1	724	83.212	5.03	465.968	14
O75369	Filamin-B OS=Homo sapiens GN=FLNB PE=1 SV=2	9.68486	18	20	17	1	2602	277.99	5.73	465.823	18
Q15428	Splicing factor 3A subunit 2 OS=Homo sapiens GN=SF3A2 PE=1 SV=2	21.1207	7	18	7	1	464	49.224	9.64	458.512	7
Q6PEY2	Tubulin alpha-3E chain OS=Homo sapiens GN=TUBA3E PE=1 SV=2	31.3333	9	13	1	1	450	49.827	5.14	451.783	9
P58317	Zinc finger protein 121 OS=Homo sapiens GN=ZNF121 PE=3 SV=2	37.4359	11	19	7	1	390	44.665	8.05	446.571	11
Q14157	Ubiquitin-associated protein 2-like OS=Homo sapiens GN=UBAP2L PE=1 SV=2	19.0432	11	14	11	1	1087	114.465	7.11	444.75	11
Q9ULD5	Zinc finger protein 777 OS=Homo sapiens GN=ZNF777 PE=1 SV=2	27.2368	16	22	16	1	760	85.123	5.92	439.123	16
Q13263	Transcription intermediary factor 1-beta OS=Homo sapiens GN=TRIM28 PE=1 SV=5	23.1138	13	14	13	1	835	88.493	5.77	437.961	13
P49368	T-complex protein 1 subunit gamma OS=Homo sapiens GN=CCT3 PE=1 SV=4	27.8899	12	15	12	1	545	60.495	6.49	437.728	12
Q15424	Scaffold attachment factor B1 OS=Homo sapiens GN=SAFB PE=1 SV=4	15.1913	12	16	1	1	915	102.58	5.47	436.671	12
Q9H116	GDNF-inducible zinc finger protein 1 OS=Homo sapiens GN=GZF1 PE=1 SV=1	30.8017	20	21	20	1	711	80.441	7.87	426.93	20
Q14566	DNA replication licensing factor MCM6 OS=Homo sapiens GN=MCM6 PE=1 SV=1	17.296	12	15	12	1	821	92.831	5.41	425.695	12
P52597	Heterogeneous nuclear ribonucleoprotein F OS=Homo sapiens GN=HNRNPF PE=1 SV=3	28.9157	9	11	8	1	415	45.643	5.58	421.261	9
P05387	60S acidic ribosomal protein P2 OS=Homo sapiens GN=RPLP2 PE=1 SV=1	81.7391	5	7	4	1	115	11.658	4.54	408.106	5
Q7Z794	Keratin, type II cytoskeletal 1b OS=Homo sapiens GN=KRT77 PE=2 SV=3	22.3183	13	20	10	1	578	61.864	5.99	394.086	13
Q13509	Tubulin beta-3 chain OS=Homo sapiens GN=TUBB3 PE=1 SV=2	21.7778	8	11	1	1	450	50.4	4.93	393.276	8
O60885	Bromodomain-containing protein 4 OS=Homo sapiens GN=BRD4 PE=1 SV=2	16.8135	19	22	19	1	1362	152.124	9.19	393.032	19
Q99470	Stromal cell-derived factor 2 OS=Homo sapiens GN=SDF2 PE=1 SV=2	36.019	4	10	4	1	211	23.011	7.33	391.835	4
Q92576	PHD finger protein 3 OS=Homo sapiens GN=PHF3 PE=1 SV=3	13.3889	20	22	20	1	2039	229.339	6.96	390.448	20
O43309	Zinc finger and SCAN domain-containing protein 12 OS=Homo sapiens GN=ZSCAN12 PE=1 SV=1	26.1589	10	14	9	1	604	70.178	6.74	388.697	10
P26599	Polypyrimidine tract-binding protein 1 OS=Homo sapiens GN=PTBP1 PE=1 SV=1	36.1582	11	14	11	1	531	57.186	9.17	384.332	11
P15622	Zinc finger protein 250 OS=Homo sapiens GN=ZNF250 PE=1 SV=3	28.0357	10	15	9	1	560	63.427	8.28	381.298	10
P15924	Desmoplakin OS=Homo sapiens GN=DSP PE=1 SV=3	6.58307	18	19	18	1	2871	331.569	6.81	376.466	18
P17020	Zinc finger protein 16 OS=Homo sapiens GN=ZNF16 PE=1 SV=3	21.4076	9	12	9	1	682	76.422	7.97	374.961	9
P61978	Heterogeneous nuclear ribonucleoprotein K OS=Homo sapiens GN=HNRNPK PE=1 SV=1	31.9654	12	12	12	1	463	50.944	5.54	374.105	12
Q9UEG4	Zinc finger protein 629 OS=Homo sapiens GN=ZNF629 PE=1 SV=2	29.9194	14	16	14	1	869	96.559	7.93	372.993	14
Q7L3S4	Zinc finger protein 771 OS=Homo sapiens GN=ZNF771 PE=1 SV=1	29.3375	6	10	6	1	317	35.679	8.79	369.123	6
P04350	Tubulin beta-4A chain OS=Homo sapiens GN=TUBB4A PE=1 SV=2	30.8559	10	12	1	0	444	49.554	4.88	367.968	10
P49321	Nuclear autoantigenic sperm protein OS=Homo sapiens GN=NASP PE=1 SV=2	24.4924	14	15	14	1	788	85.186	4.3	365.072	14
Q8TAQ2	SWI/SNF complex subunit SMARCC2 OS=Homo sapiens GN=SMARCC2 PE=1 SV=1	16.4745	14	14	14	1	1214	132.797	5.69	364.453	14
O75832	26S proteasome non-ATPase regulatory subunit 10 OS=Homo sapiens GN=PSMD10 PE=1 SV=1	40.708	8	13	8	1	226	24.412	6.1	363.102	8
Q07020	60S ribosomal protein L18 OS=Homo sapiens GN=RPL18 PE=1 SV=2	34.5745	6	10	6	1	188	21.621	11.72	362.863	6
Q9NWT1	p21-activated protein kinase-interacting protein 1 OS=Homo sapiens GN=PAK1IP1 PE=1 SV=2	22.9592	7	9	7	1	392	43.936	8.91	361.732	7
Q969X6	U3 small nucleolar RNA-associated protein 4 homolog OS=Homo sapiens GN=UTP4 PE=1 SV=1	18.0758	9	10	9	1	686	76.841	8.85	361.068	9
Q9UK58	Cyclin-L1 OS=Homo sapiens GN=CCNL1 PE=1 SV=1	18.8213	10	12	10	1	526	59.597	10.7	360.514	10
Q5T6F2	Ubiquitin-associated protein 2 OS=Homo sapiens GN=UBAP2 PE=1 SV=1	12.5112	10	10	10	1	1119	117.044	7.34	357.93	10
Q9NY65	Tubulin alpha-8 chain OS=Homo sapiens GN=TUBA8 PE=1 SV=1	26.5033	9	12	2	0	449	50.062	5.06	356.46	9
Q14241	Transcription elongation factor B polypeptide 3 OS=Homo sapiens GN=TCEB3 PE=1 SV=2	14.6617	9	13	9	1	798	89.853	9.57	354.58	9
Q13557	Calcium/calmodulin-dependent protein kinase type II subunit delta OS=Homo sapiens GN=CAMK2D PE=1 SV=3	24.8497	11	12	8	1	499	56.334	7.25	353.164	11
Q9NW07	Zinc finger protein 358 OS=Homo sapiens GN=ZNF358 PE=1 SV=2	18.838	7	11	7	1	568	59.25	6.6	350.425	7
P06748	Nucleophosmin OS=Homo sapiens GN=NPM1 PE=1 SV=2	36.0544	9	11	9	1	294	32.555	4.78	350.419	9
Q96K58	Zinc finger protein 668 OS=Homo sapiens GN=ZNF668 PE=1 SV=3	35.7027	16	22	16	1	619	67.846	8.9	350.26	16
P68104	Elongation factor 1-alpha 1 OS=Homo sapiens GN=EEF1A1 PE=1 SV=1	32.9004	10	14	10	1	462	50.109	9.01	349.866	10
Q5VTE0	Putative elongation factor 1-alpha-like 3 OS=Homo sapiens GN=EEF1A1P5 PE=5 SV=1	32.9004	10	14	10	1	462	50.153	9.07	349.866	10
Q9H0G5	Nuclear speckle splicing regulatory protein 1 OS=Homo sapiens GN=NSRP1 PE=1 SV=1	27.7778	13	22	13	1	558	66.35	8.84	349.588	13
P07900	Heat shock protein HSP 90-alpha OS=Homo sapiens GN=HSP90AA1 PE=1 SV=5	18.1694	11	13	4	1	732	84.607	5.02	346.926	11
Q8TF47	Zinc finger protein 90 homolog OS=Homo sapiens GN=ZFP90 PE=1 SV=2	27.673	10	11	10	1	636	72.985	8.06	332.173	10
Q96ST3	Paired amphipathic helix protein Sin3a OS=Homo sapiens GN=SIN3A PE=1 SV=2	12.3331	13	13	13	1	1273	145.085	7.25	328.777	13
Q15072	Zinc finger protein OZF OS=Homo sapiens GN=ZNF146 PE=1 SV=2	38.6986	9	12	9	1	292	33.286	8.88	327.951	9
P60709	Actin, cytoplasmic 1 OS=Homo sapiens GN=ACTB PE=1 SV=1	44.5333	12	14	4	1	375	41.71	5.48	314.825	12
P63261	Actin, cytoplasmic 2 OS=Homo sapiens GN=ACTG1 PE=1 SV=1	44.5333	12	14	4	1	375	41.766	5.48	314.825	12
P31943	Heterogeneous nuclear ribonucleoprotein H OS=Homo sapiens GN=HNRNPH1 PE=1 SV=4	24.0535	7	9	4	1	449	49.198	6.3	313.741	7
Q7Z2E3	Aprataxin OS=Homo sapiens GN=APTX PE=1 SV=2	34.8315	10	14	10	1	356	40.714	9.17	311.05	10
P52746	Zinc finger protein 142 OS=Homo sapiens GN=ZNF142 PE=1 SV=4	9.48429	12	14	12	1	1687	187.758	7.91	310.821	12
Q13627	Dual specificity tyrosine-phosphorylation-regulated kinase 1A OS=Homo sapiens GN=DYRK1A PE=1 SV=2	21.363	16	18	16	1	763	85.53	8.75	309.878	16
Q9UHD1	Cysteine and histidine-rich domain-containing protein 1 OS=Homo sapiens GN=CHORDC1 PE=1 SV=2	33.7349	8	10	8	1	332	37.466	7.87	308.372	8
Q5VV52	Zinc finger protein 691 OS=Homo sapiens GN=ZNF691 PE=1 SV=1	16.9872	4	9	4	1	312	35.658	7.9	306.72	4
Q9P0U3	Sentrin-specific protease 1 OS=Homo sapiens GN=SENP1 PE=1 SV=2	17.7019	9	10	9	1	644	73.435	8.47	305.558	9
Q92945	Far upstream element-binding protein 2 OS=Homo sapiens GN=KHSRP PE=1 SV=4	20.9564	9	10	9	1	711	73.07	7.3	303.53	9
Q8IY67	Ribonucleoprotein PTB-binding 1 OS=Homo sapiens GN=RAVER1 PE=1 SV=1	17.9868	7	8	7	1	606	63.837	8.48	300.975	7
P17010	Zinc finger X-chromosomal protein OS=Homo sapiens GN=ZFX PE=2 SV=2	12.2981	7	10	7	1	805	90.464	6.14	299.502	7
Q9Y262	Eukaryotic translation initiation factor 3 subunit L OS=Homo sapiens GN=EIF3L PE=1 SV=1	22.8723	10	11	10	1	564	66.684	6.34	297.32	10
Q6DN90	IQ motif and SEC7 domain-containing protein 1 OS=Homo sapiens GN=IQSEC1 PE=1 SV=1	11.3188	8	9	8	1	963	108.247	6.93	295.946	8
Q12834	Cell division cycle protein 20 homolog OS=Homo sapiens GN=CDC20 PE=1 SV=2	23.6473	7	8	7	1	499	54.689	9.23	295.678	7
Q15637	Splicing factor 1 OS=Homo sapiens GN=SF1 PE=1 SV=4	20.3443	10	14	10	1	639	68.286	8.98	294.09	10
P21333	Filamin-A OS=Homo sapiens GN=FLNA PE=1 SV=4	5.62901	12	12	11	1	2647	280.564	6.06	291.52	12
P62491	Ras-related protein Rab-11A OS=Homo sapiens GN=RAB11A PE=1 SV=3	47.2222	9	12	2	1	216	24.378	6.57	289.432	9
Q9C0J8	pre-mRNA 3' end processing protein WDR33 OS=Homo sapiens GN=WDR33 PE=1 SV=2	12.7994	9	9	9	1	1336	145.799	9.17	288.91	9
Q8N684	Cleavage and polyadenylation specificity factor subunit 7 OS=Homo sapiens GN=CPSF7 PE=1 SV=1	23.9915	10	12	10	1	471	52.018	8	288.128	10
P84098	60S ribosomal protein L19 OS=Homo sapiens GN=RPL19 PE=1 SV=1	17.8571	4	6	4	1	196	23.451	11.47	287.743	4
P09429	High mobility group protein B1 OS=Homo sapiens GN=HMGB1 PE=1 SV=3	22.3256	5	8	5	1	215	24.878	5.74	287.669	5
Q15907	Ras-related protein Rab-11B OS=Homo sapiens GN=RAB11B PE=1 SV=4	38.9908	8	9	1	1	218	24.473	5.94	283.317	8
P54652	Heat shock-related 70 kDa protein 2 OS=Homo sapiens GN=HSPA2 PE=1 SV=1	11.7371	6	8	4	1	639	69.978	5.74	279.23	6
Q8IVS2	Malonyl-CoA-acyl carrier protein transacylase, mitochondrial OS=Homo sapiens GN=MCAT PE=1 SV=2	27.9487	6	7	6	1	390	42.934	8.72	278.934	6
Q06830	Peroxiredoxin-1 OS=Homo sapiens GN=PRDX1 PE=1 SV=1	59.2965	10	12	9	1	199	22.096	8.13	272.738	10
Q9UC06	Zinc finger protein 70 OS=Homo sapiens GN=ZNF70 PE=2 SV=2	22.6457	7	10	7	1	446	50.769	8.31	272.044	7
P0DMV9	Heat shock 70 kDa protein 1B OS=Homo sapiens GN=HSPA1B PE=1 SV=1	20.7488	11	13	9	1	641	70.009	5.66	267.597	11
P34931	Heat shock 70 kDa protein 1-like OS=Homo sapiens GN=HSPA1L PE=1 SV=2	10.6084	5	7	3	0	641	70.331	6.02	267.494	5
Q5D862	Filaggrin-2 OS=Homo sapiens GN=FLG2 PE=1 SV=1	4.68423	6	7	6	1	2391	247.928	8.31	265.407	6
P02768	Serum albumin OS=Homo sapiens GN=ALB PE=1 SV=2	15.7635	10	14	10	1	609	69.321	6.28	265.357	10
Q15366	Poly(rC)-binding protein 2 OS=Homo sapiens GN=PCBP2 PE=1 SV=1	35.8904	8	11	5	1	365	38.556	6.79	263.376	8
P13646	Keratin, type I cytoskeletal 13 OS=Homo sapiens GN=KRT13 PE=1 SV=4	9.17031	5	8	2	0	458	49.557	4.96	260.255	5
P51608	Methyl-CpG-binding protein 2 OS=Homo sapiens GN=MECP2 PE=1 SV=1	24.8971	8	8	8	1	486	52.409	9.95	259.29	8
Q5HYJ3	Protein FAM76B OS=Homo sapiens GN=FAM76B PE=1 SV=3	27.4336	6	9	6	1	339	38.683	9.25	258.571	6
P30533	Alpha-2-macroglobulin receptor-associated protein OS=Homo sapiens GN=LRPAP1 PE=1 SV=1	19.3277	6	7	6	1	357	41.441	8.78	258.077	6
P10075	Zinc finger protein GLI4 OS=Homo sapiens GN=GLI4 PE=1 SV=2	26.8617	7	9	6	1	376	41.119	8.81	256.774	7
O43290	U4/U6.U5 tri-snRNP-associated protein 1 OS=Homo sapiens GN=SART1 PE=1 SV=1	14.125	7	7	7	1	800	90.2	6.13	256.75	7
Q92908	Transcription factor GATA-6 OS=Homo sapiens GN=GATA6 PE=1 SV=2	14.4538	4	4	4	1	595	59.995	8.35	256.63	4
Q8NAV1	Pre-mRNA-splicing factor 38A OS=Homo sapiens GN=PRPF38A PE=1 SV=1	18.5897	6	9	6	1	312	37.453	9.96	255.97	6
P13797	Plastin-3 OS=Homo sapiens GN=PLS3 PE=1 SV=4	14.127	7	9	7	1	630	70.766	5.6	255.793	7
O95678	Keratin, type II cytoskeletal 75 OS=Homo sapiens GN=KRT75 PE=1 SV=2	14.882	8	11	2	0	551	59.524	7.74	255.128	8
Q96IR2	Zinc finger protein 845 OS=Homo sapiens GN=ZNF845 PE=2 SV=3	11.6495	9	11	6	1	970	113.06	9.33	251.843	9
Q14247	Src substrate cortactin OS=Homo sapiens GN=CTTN PE=1 SV=2	18.3636	6	6	6	1	550	61.549	5.4	249.277	6
O95819	Mitogen-activated protein kinase kinase kinase kinase 4 OS=Homo sapiens GN=MAP4K4 PE=1 SV=2	8.95884	8	8	8	1	1239	142.013	7.46	244.451	8
Q8TAD8	Smad nuclear-interacting protein 1 OS=Homo sapiens GN=SNIP1 PE=1 SV=1	23.4848	8	8	8	1	396	45.75	9.99	243.098	8
Q92833	Protein Jumonji OS=Homo sapiens GN=JARID2 PE=1 SV=2	10.8347	9	11	9	1	1246	138.648	9.38	242.134	9
P78344	Eukaryotic translation initiation factor 4 gamma 2 OS=Homo sapiens GN=EIF4G2 PE=1 SV=1	14.0022	12	14	12	1	907	102.297	7.14	240.4	12
Q9NSY1	BMP-2-inducible protein kinase OS=Homo sapiens GN=BMP2K PE=1 SV=2	12.1447	9	11	9	1	1161	129.091	6.51	240.34	9
Q13595	Transformer-2 protein homolog alpha OS=Homo sapiens GN=TRA2A PE=1 SV=1	23.7589	8	11	8	1	282	32.669	11.27	238.242	8
Q9Y462	Zinc finger protein 711 OS=Homo sapiens GN=ZNF711 PE=1 SV=2	15.5059	9	9	9	1	761	86.19	6.87	236.238	9
P52272	Heterogeneous nuclear ribonucleoprotein M OS=Homo sapiens GN=HNRNPM PE=1 SV=3	16.7123	9	9	9	1	730	77.464	8.7	235.71	9
Q13555	Calcium/calmodulin-dependent protein kinase type II subunit gamma OS=Homo sapiens GN=CAMK2G PE=1 SV=3	17.7419	9	10	6	1	558	62.57	7.83	234.169	9
P22087	rRNA 2'-O-methyltransferase fibrillarin OS=Homo sapiens GN=FBL PE=1 SV=2	30.5296	8	11	8	1	321	33.763	10.18	233.412	8
Q8TF39	Zinc finger protein 483 OS=Homo sapiens GN=ZNF483 PE=1 SV=3	13.8441	10	11	10	1	744	85.044	8.57	233.1	10
Q7Z3Y7	Keratin, type I cytoskeletal 28 OS=Homo sapiens GN=KRT28 PE=1 SV=2	5.60345	4	8	2	1	464	50.536	5.47	225.76	4
Q9NRR4	Ribonuclease 3 OS=Homo sapiens GN=DROSHA PE=1 SV=2	11.2082	10	10	10	1	1374	159.214	7.87	224.813	10
Q13310	Polyadenylate-binding protein 4 OS=Homo sapiens GN=PABPC4 PE=1 SV=1	16.7702	10	11	8	1	644	70.738	9.26	223.895	10
Q08AN1	Zinc finger protein 616 OS=Homo sapiens GN=ZNF616 PE=2 SV=2	11.6517	7	9	6	1	781	90.215	9.57	223.601	7
P12035	Keratin, type II cytoskeletal 3 OS=Homo sapiens GN=KRT3 PE=1 SV=3	9.23567	7	9	1	1	628	64.378	6.48	223.595	7
Q86YZ3	Hornerin OS=Homo sapiens GN=HRNR PE=1 SV=2	10.3158	5	9	5	1	2850	282.228	10.04	222.74	5
P11940	Polyadenylate-binding protein 1 OS=Homo sapiens GN=PABPC1 PE=1 SV=2	20.1258	9	9	7	1	636	70.626	9.5	222.276	9
P04406	Glyceraldehyde-3-phosphate dehydrogenase OS=Homo sapiens GN=GAPDH PE=1 SV=3	29.2537	8	8	8	1	335	36.03	8.46	220.816	8
Q8NC51	Plasminogen activator inhibitor 1 RNA-binding protein OS=Homo sapiens GN=SERBP1 PE=1 SV=2	29.1667	11	11	11	1	408	44.938	8.65	217.9	11
P19338	Nucleolin OS=Homo sapiens GN=NCL PE=1 SV=3	11.831	8	8	8	1	710	76.568	4.7	217.39	8
Q9UPT9	Ubiquitin carboxyl-terminal hydrolase 22 OS=Homo sapiens GN=USP22 PE=1 SV=2	17.3333	8	8	8	1	525	59.921	8.05	215.967	8
Q5SW79	Centrosomal protein of 170 kDa OS=Homo sapiens GN=CEP170 PE=1 SV=1	7.44949	8	8	8	1	1584	175.187	7.11	215.461	8
O43660	Pleiotropic regulator 1 OS=Homo sapiens GN=PLRG1 PE=1 SV=1	18.677	6	8	6	1	514	57.158	9.17	213.106	6
Q9GZN8	UPF0687 protein C20orf27 OS=Homo sapiens GN=C20orf27 PE=1 SV=3	58.6207	7	8	7	1	174	19.279	6.84	212.33	7
P68032	Actin, alpha cardiac muscle 1 OS=Homo sapiens GN=ACTC1 PE=1 SV=1	26.7905	9	11	1	1	377	41.992	5.39	211.138	9
P68133	Actin, alpha skeletal muscle OS=Homo sapiens GN=ACTA1 PE=1 SV=1	26.7905	9	11	1	1	377	42.024	5.39	211.138	9
Q9BVI4	Nucleolar complex protein 4 homolog OS=Homo sapiens GN=NOC4L PE=1 SV=1	25	11	12	11	1	516	58.431	7.49	210.929	11
Q8N1N4	Keratin, type II cytoskeletal 78 OS=Homo sapiens GN=KRT78 PE=2 SV=2	20.7692	9	10	8	1	520	56.83	6.02	208.31	9
P08048	Zinc finger Y-chromosomal protein OS=Homo sapiens GN=ZFY PE=1 SV=3	8.48939	5	8	5	1	801	90.447	6.06	206.624	5
Q8N3J9	Zinc finger protein 664 OS=Homo sapiens GN=ZNF664 PE=2 SV=1	19.9234	3	7	3	1	261	30.263	8.69	204.134	3
Q02930	Cyclic AMP-responsive element-binding protein 5 OS=Homo sapiens GN=CREB5 PE=1 SV=3	20.2756	7	9	7	1	508	56.882	8.5	202.053	7
Q9UPW0	Forkhead box protein J3 OS=Homo sapiens GN=FOXJ3 PE=1 SV=2	8.03859	3	4	3	1	622	68.917	7.09	200.39	3
Q08211	ATP-dependent RNA helicase A OS=Homo sapiens GN=DHX9 PE=1 SV=4	7.55906	8	8	8	1	1270	140.869	6.84	199.844	8
P22681	E3 ubiquitin-protein ligase CBL OS=Homo sapiens GN=CBL PE=1 SV=2	12.9139	9	9	9	1	906	99.569	6.54	199.34	9
Q05639	Elongation factor 1-alpha 2 OS=Homo sapiens GN=EEF1A2 PE=1 SV=1	11.4471	5	7	5	1	463	50.438	9.03	199.26	5
P14923	Junction plakoglobin OS=Homo sapiens GN=JUP PE=1 SV=3	9.66443	6	6	6	1	745	81.693	6.14	196.4	6
A8MQ14	Zinc finger protein 850 OS=Homo sapiens GN=ZNF850 PE=3 SV=2	5.59633	4	6	3	1	1090	125.35	8.7	195.047	4
Q04695	Keratin, type I cytoskeletal 17 OS=Homo sapiens GN=KRT17 PE=1 SV=2	18.5185	10	13	2	1	432	48.076	5.02	194.396	10
P63267	Actin, gamma-enteric smooth muscle OS=Homo sapiens GN=ACTG2 PE=1 SV=1	23.9362	8	10	1	1	376	41.85	5.48	190.333	8
P62736	Actin, aortic smooth muscle OS=Homo sapiens GN=ACTA2 PE=1 SV=1	23.8727	8	10	1	1	377	41.982	5.39	190.333	8
Q12906	Interleukin enhancer-binding factor 3 OS=Homo sapiens GN=ILF3 PE=1 SV=3	7.15884	4	4	4	1	894	95.279	8.76	189.26	4
Q4G0J3	La-related protein 7 OS=Homo sapiens GN=LARP7 PE=1 SV=1	15.1203	7	8	7	1	582	66.857	9.55	188.097	7
P56270	Myc-associated zinc finger protein OS=Homo sapiens GN=MAZ PE=1 SV=1	15.5136	6	10	6	1	477	48.576	8.95	185.54	6
Q01546	Keratin, type II cytoskeletal 2 oral OS=Homo sapiens GN=KRT76 PE=1 SV=2	7.05329	6	9	0	0	638	65.8	8.12	184.613	6
Q8WXX5	DnaJ homolog subfamily C member 9 OS=Homo sapiens GN=DNAJC9 PE=1 SV=1	22.3077	5	5	5	1	260	29.891	5.73	181.53	5
Q96A49	Synapse-associated protein 1 OS=Homo sapiens GN=SYAP1 PE=1 SV=1	13.0682	4	4	4	1	352	39.909	4.53	180.67	4
Q8TAQ5	Zinc finger protein 420 OS=Homo sapiens GN=ZNF420 PE=1 SV=1	24.2733	8	10	6	1	688	80.195	8.62	177.484	8
P63104	14-3-3 protein zeta/delta OS=Homo sapiens GN=YWHAZ PE=1 SV=1	21.6327	4	4	4	1	245	27.728	4.79	176.74	4
P27816	Microtubule-associated protein 4 OS=Homo sapiens GN=MAP4 PE=1 SV=3	7.20486	6	6	6	1	1152	120.93	5.43	175.273	6
P55795	Heterogeneous nuclear ribonucleoprotein H2 OS=Homo sapiens GN=HNRNPH2 PE=1 SV=1	12.0267	4	6	1	1	449	49.232	6.3	174.607	4
Q6KB66	Keratin, type II cytoskeletal 80 OS=Homo sapiens GN=KRT80 PE=1 SV=2	8.40708	3	3	2	1	452	50.494	5.67	174.017	3
O95409	Zinc finger protein ZIC 2 OS=Homo sapiens GN=ZIC2 PE=1 SV=2	12.218	4	6	3	1	532	54.971	8.41	172.67	4
P68871	Hemoglobin subunit beta OS=Homo sapiens GN=HBB PE=1 SV=2	59.8639	7	10	7	1	147	15.988	7.28	171.056	7
Q6UN15	Pre-mRNA 3'-end-processing factor FIP1 OS=Homo sapiens GN=FIP1L1 PE=1 SV=1	10.6061	4	4	4	1	594	66.487	5.59	170.939	4
Q96PV7	Protein FAM193B OS=Homo sapiens GN=FAM193B PE=1 SV=3	8.42572	7	8	7	1	902	96.482	7.9	170.339	7
P05787	Keratin, type II cytoskeletal 8 OS=Homo sapiens GN=KRT8 PE=1 SV=7	9.52381	7	11	0	0	483	53.671	5.59	169.643	7
Q9Y2L9	Leucine-rich repeat and calponin homology domain-containing protein 1 OS=Homo sapiens GN=LRCH1 PE=1 SV=3	8.1044	4	5	4	1	728	80.824	5.94	169.36	4
O15405	TOX high mobility group box family member 3 OS=Homo sapiens GN=TOX3 PE=1 SV=2	7.63889	3	3	3	1	576	63.302	7.85	169.31	3
Q2M2I5	Keratin, type I cytoskeletal 24 OS=Homo sapiens GN=KRT24 PE=1 SV=1	3.42857	2	4	1	1	525	55.053	4.96	169.159	2
Q5XKE5	Keratin, type II cytoskeletal 79 OS=Homo sapiens GN=KRT79 PE=1 SV=2	8.97196	5	8	0	3	535	57.8	7.2	168.72	5
O15014	Zinc finger protein 609 OS=Homo sapiens GN=ZNF609 PE=1 SV=2	4.46492	5	5	5	1	1411	151.098	8.03	168.58	5
Q9H7H0	Methyltransferase-like protein 17, mitochondrial OS=Homo sapiens GN=METTL17 PE=1 SV=1	14.0351	6	7	6	1	456	50.701	9.33	164.477	6
Q9H853	Putative tubulin-like protein alpha-4B OS=Homo sapiens GN=TUBA4B PE=5 SV=2	10.7884	2	4	1	1	241	27.534	7.83	164.23	2
P31944	Caspase-14 OS=Homo sapiens GN=CASP14 PE=1 SV=2	26.4463	5	5	5	1	242	27.662	5.58	161.6	5
P07237	Protein disulfide-isomerase OS=Homo sapiens GN=P4HB PE=1 SV=3	15.1575	7	8	7	1	508	57.081	4.87	160.571	7
Q6S8J3	POTE ankyrin domain family member E OS=Homo sapiens GN=POTEE PE=2 SV=3	4.65116	4	6	1	1	1075	121.286	6.2	160.15	4
A5A3E0	POTE ankyrin domain family member F OS=Homo sapiens GN=POTEF PE=1 SV=2	4.65116	4	6	1	1	1075	121.367	6.2	160.15	4
Q7Z3Z0	Keratin, type I cytoskeletal 25 OS=Homo sapiens GN=KRT25 PE=1 SV=1	4	2	4	1	1	450	49.287	5.08	158.5	2
Q7Z3Y8	Keratin, type I cytoskeletal 27 OS=Homo sapiens GN=KRT27 PE=1 SV=2	3.92157	2	4	1	1	459	49.792	5.05	158.5	2
P17066	Heat shock 70 kDa protein 6 OS=Homo sapiens GN=HSPA6 PE=1 SV=2	8.8647	5	6	3	0	643	70.984	6.14	158.21	5
Q9Y6M1	Insulin-like growth factor 2 mRNA-binding protein 2 OS=Homo sapiens GN=IGF2BP2 PE=1 SV=2	11.5192	5	5	5	1	599	66.081	8.46	157.927	5
Q9BYX7	Putative beta-actin-like protein 3 OS=Homo sapiens GN=POTEKP PE=5 SV=1	10.6667	3	5	1	1	375	41.989	6.33	157.61	3
Q58FF7	Putative heat shock protein HSP 90-beta-3 OS=Homo sapiens GN=HSP90AB3P PE=5 SV=1	8.71022	5	6	3	1	597	68.282	4.79	157.2	5
Q15365	Poly(rC)-binding protein 1 OS=Homo sapiens GN=PCBP1 PE=1 SV=2	21.6292	5	7	2	1	356	37.474	7.09	156.8	5
Q02543	60S ribosomal protein L18a OS=Homo sapiens GN=RPL18A PE=1 SV=2	34.6591	6	7	6	1	176	20.749	10.71	156.767	6
Q86UK7	Zinc finger protein 598 OS=Homo sapiens GN=ZNF598 PE=1 SV=1	9.18142	6	6	6	1	904	98.575	8.4	156.7	6
Q9NW75	G patch domain-containing protein 2 OS=Homo sapiens GN=GPATCH2 PE=1 SV=1	7.76515	2	2	2	1	528	58.907	9.09	156.46	2
Q9Y4E5	E3 SUMO-protein ligase ZNF451 OS=Homo sapiens GN=ZNF451 PE=1 SV=2	6.03205	5	7	5	1	1061	121.406	6.77	156.393	5
Q13554	Calcium/calmodulin-dependent protein kinase type II subunit beta OS=Homo sapiens GN=CAMK2B PE=1 SV=3	7.80781	5	6	2	0	666	72.632	7.27	155.396	5
Q9Y224	UPF0568 protein C14orf166 OS=Homo sapiens GN=C14orf166 PE=1 SV=1	12.2951	2	2	2	1	244	28.051	6.65	154.68	2
P57721	Poly(rC)-binding protein 3 OS=Homo sapiens GN=PCBP3 PE=2 SV=2	12.1294	3	4	1	1	371	39.44	8.07	154.3	3
Q86UY6	N-alpha-acetyltransferase 40 OS=Homo sapiens GN=NAA40 PE=1 SV=1	19.4093	4	5	4	1	237	27.176	7.39	154.15	4
Q8N0Y2	Zinc finger protein 444 OS=Homo sapiens GN=ZNF444 PE=1 SV=1	28.1346	6	7	6	1	327	35.182	8.56	154.079	6
Q9NYW8	RB-associated KRAB zinc finger protein OS=Homo sapiens GN=RBAK PE=1 SV=1	10.3641	6	8	5	1	714	82.941	7.33	153.821	6
P31946	14-3-3 protein beta/alpha OS=Homo sapiens GN=YWHAB PE=1 SV=3	29.6748	6	7	5	1	246	28.065	4.83	152.49	6
P51858	Hepatoma-derived growth factor OS=Homo sapiens GN=HDGF PE=1 SV=1	33.75	4	5	4	1	240	26.772	4.73	152.14	4
Q9HAZ1	Dual specificity protein kinase CLK4 OS=Homo sapiens GN=CLK4 PE=1 SV=1	14.7609	5	7	3	1	481	57.455	8.68	151.53	5
Q9Y383	Putative RNA-binding protein Luc7-like 2 OS=Homo sapiens GN=LUC7L2 PE=1 SV=2	11.9898	4	5	4	1	392	46.486	10.01	151.045	4
Q8NI77	Kinesin-like protein KIF18A OS=Homo sapiens GN=KIF18A PE=1 SV=2	6.68151	4	5	4	1	898	102.216	8.91	150.94	4
P19012	Keratin, type I cytoskeletal 15 OS=Homo sapiens GN=KRT15 PE=1 SV=3	10.7456	7	8	0	2	456	49.181	4.77	150.517	7
P08727	Keratin, type I cytoskeletal 19 OS=Homo sapiens GN=KRT19 PE=1 SV=4	9.25	6	9	1	1	400	44.079	5.14	150.5	6
P62269	40S ribosomal protein S18 OS=Homo sapiens GN=RPS18 PE=1 SV=3	32.2368	5	5	5	1	152	17.708	10.99	150.027	5
Q96JF6	Zinc finger protein 594 OS=Homo sapiens GN=ZNF594 PE=2 SV=3	12.6394	8	8	8	1	807	93.847	8.7	149.249	8
Q9UKV8	Protein argonaute-2 OS=Homo sapiens GN=AGO2 PE=1 SV=3	7.91618	6	6	6	1	859	97.146	9.19	148.45	6
P36578	60S ribosomal protein L4 OS=Homo sapiens GN=RPL4 PE=1 SV=5	14.0515	5	8	5	1	427	47.667	11.06	146.68	5
O75663	TIP41-like protein OS=Homo sapiens GN=TIPRL PE=1 SV=2	24.2647	5	6	5	1	272	31.424	5.91	146.173	5
Q9Y5J3	Hairy/enhancer-of-split related with YRPW motif protein 1 OS=Homo sapiens GN=HEY1 PE=1 SV=1	11.8421	3	5	3	1	304	32.593	8.95	146.14	3
P08865	40S ribosomal protein SA OS=Homo sapiens GN=RPSA PE=1 SV=4	13.5593	3	3	3	1	295	32.833	4.87	145.397	3
O95881	Thioredoxin domain-containing protein 12 OS=Homo sapiens GN=TXNDC12 PE=1 SV=1	25.5814	3	4	3	1	172	19.194	5.4	143.954	3
Q9C0F3	Zinc finger protein 436 OS=Homo sapiens GN=ZNF436 PE=1 SV=2	17.8723	5	7	5	1	470	54.242	7.18	143.301	5
O43422	52 kDa repressor of the inhibitor of the protein kinase OS=Homo sapiens GN=THAP12 PE=1 SV=2	10.3811	6	6	6	1	761	87.648	5.86	143.184	6
O60231	Putative pre-mRNA-splicing factor ATP-dependent RNA helicase DHX16 OS=Homo sapiens GN=DHX16 PE=1 SV=2	3.65034	3	4	2	1	1041	119.189	6.8	142.72	3
Q9HBT8	Zinc finger protein 286A OS=Homo sapiens GN=ZNF286A PE=1 SV=1	8.82917	4	6	2	1	521	60.136	8.32	141.813	4
P62277	40S ribosomal protein S13 OS=Homo sapiens GN=RPS13 PE=1 SV=2	25.1656	3	4	3	1	151	17.212	10.54	141.29	3
Q96JH7	Deubiquitinating protein VCIP135 OS=Homo sapiens GN=VCPIP1 PE=1 SV=2	4.00982	4	4	4	1	1222	134.236	7.2	140.98	4
Q9Y5A6	Zinc finger and SCAN domain-containing protein 21 OS=Homo sapiens GN=ZSCAN21 PE=1 SV=2	19.6617	7	11	5	1	473	53.624	7.72	139.677	7
Q7Z3Y9	Keratin, type I cytoskeletal 26 OS=Homo sapiens GN=KRT26 PE=1 SV=2	1.92308	1	3	0	3	468	51.878	4.92	138.92	1
Q02413	Desmoglein-1 OS=Homo sapiens GN=DSG1 PE=1 SV=2	9.2469	6	7	6	1	1049	113.676	5.03	138.673	6
Q6NSZ9	Zinc finger and SCAN domain-containing protein 25 OS=Homo sapiens GN=ZSCAN25 PE=1 SV=3	11.5809	6	6	6	1	544	61.435	7.72	136.777	6
P27635	60S ribosomal protein L10 OS=Homo sapiens GN=RPL10 PE=1 SV=4	20.5607	4	6	4	1	214	24.588	10.08	135.97	4
Q93034	Cullin-5 OS=Homo sapiens GN=CUL5 PE=1 SV=4	7.30769	5	5	5	1	780	90.897	7.94	135.88	5
P26641	Elongation factor 1-gamma OS=Homo sapiens GN=EEF1G PE=1 SV=3	13.9588	5	5	5	1	437	50.087	6.67	135.84	5
P48741	Putative heat shock 70 kDa protein 7 OS=Homo sapiens GN=HSPA7 PE=5 SV=2	13.079	4	5	2	1	367	40.22	7.87	134.84	4
Q96NM4	TOX high mobility group box family member 2 OS=Homo sapiens GN=TOX2 PE=2 SV=2	6.35246	2	2	2	1	488	51.571	6.71	134.22	2
Q8TEQ6	Gem-associated protein 5 OS=Homo sapiens GN=GEMIN5 PE=1 SV=3	5.37135	7	8	7	1	1508	168.483	6.62	133.757	7
P17032	Zinc finger protein 37A OS=Homo sapiens GN=ZNF37A PE=2 SV=3	5.34759	2	5	1	0	561	65.376	8.19	132.449	2
O95782	AP-2 complex subunit alpha-1 OS=Homo sapiens GN=AP2A1 PE=1 SV=3	6.65302	5	5	5	1	977	107.478	7.03	131.55	5
O75319	RNA/RNP complex-1-interacting phosphatase OS=Homo sapiens GN=DUSP11 PE=1 SV=1	25.4545	7	11	7	1	330	38.915	9.41	130.61	7
Q8IZH2	5'-3' exoribonuclease 1 OS=Homo sapiens GN=XRN1 PE=1 SV=1	4.63072	7	7	7	1	1706	193.985	7.21	130.587	7
P42771	Cyclin-dependent kinase inhibitor 2A OS=Homo sapiens GN=CDKN2A PE=1 SV=2	26.2821	3	3	3	1	156	16.522	5.81	130.047	3
Q96QA5	Gasdermin-A OS=Homo sapiens GN=GSDMA PE=1 SV=4	6.51685	2	2	2	1	445	49.334	5.29	130.01	2
Q6ZMS4	Zinc finger protein 852 OS=Homo sapiens GN=ZNF852 PE=1 SV=4	14.1805	5	7	3	1	543	62.044	8.12	129.893	5
P17027	Zinc finger protein 23 OS=Homo sapiens GN=ZNF23 PE=2 SV=3	16.0187	4	6	1	1	643	73.012	8.12	129.658	4
A6NKD9	Coiled-coil domain-containing protein 85C OS=Homo sapiens GN=CCDC85C PE=1 SV=1	10.5012	3	3	3	1	419	45.182	6.96	129.65	3
P17097	Zinc finger protein 7 OS=Homo sapiens GN=ZNF7 PE=1 SV=1	6.99708	4	5	3	1	686	77.837	8.29	128.903	4
O75820	Zinc finger protein 189 OS=Homo sapiens GN=ZNF189 PE=1 SV=2	20.7668	11	11	11	1	626	72.929	8.5	128.666	11
Q3ZCM7	Tubulin beta-8 chain OS=Homo sapiens GN=TUBB8 PE=1 SV=2	13.0631	5	5	1	1	444	49.744	4.89	128.585	5
Q5MCW4	Zinc finger protein 569 OS=Homo sapiens GN=ZNF569 PE=1 SV=1	6.26822	2	4	1	1	686	79.531	8.66	128.505	2
Q02878	60S ribosomal protein L6 OS=Homo sapiens GN=RPL6 PE=1 SV=3	20.4861	5	5	5	1	288	32.708	10.58	128.293	5
Q562R1	Beta-actin-like protein 2 OS=Homo sapiens GN=ACTBL2 PE=1 SV=2	11.1702	4	5	0	2	376	41.976	5.59	126.278	4
P46736	Lys-63-specific deubiquitinase BRCC36 OS=Homo sapiens GN=BRCC3 PE=1 SV=2	24.0506	5	5	5	1	316	36.049	5.92	126.204	5
Q8WUA2	Peptidyl-prolyl cis-trans isomerase-like 4 OS=Homo sapiens GN=PPIL4 PE=1 SV=1	11.1789	4	4	4	1	492	57.189	5.92	125.8	4
Q15937	Zinc finger protein 79 OS=Homo sapiens GN=ZNF79 PE=1 SV=2	12.6506	5	6	4	1	498	55.314	8.18	125.044	5
P31948	Stress-induced-phosphoprotein 1 OS=Homo sapiens GN=STIP1 PE=1 SV=1	13.8122	8	8	8	1	543	62.599	6.8	124.8	8
P49759	Dual specificity protein kinase CLK1 OS=Homo sapiens GN=CLK1 PE=1 SV=2	11.157	4	5	2	1	484	57.254	8.87	123.73	4
O15169	Axin-1 OS=Homo sapiens GN=AXIN1 PE=1 SV=2	8.12065	5	5	5	1	862	95.576	6.96	122.8	5
Q15652	Probable JmjC domain-containing histone demethylation protein 2C OS=Homo sapiens GN=JMJD1C PE=1 SV=2	2.75591	4	6	4	1	2540	284.349	7.87	122.3	4
Q58FG1	Putative heat shock protein HSP 90-alpha A4 OS=Homo sapiens GN=HSP90AA4P PE=5 SV=1	5.74163	2	4	0	2	418	47.682	5.19	121.95	2
A6NHL2	Tubulin alpha chain-like 3 OS=Homo sapiens GN=TUBAL3 PE=1 SV=2	6.27803	3	3	1	1	446	49.877	6.05	121.43	3
Q9BUF5	Tubulin beta-6 chain OS=Homo sapiens GN=TUBB6 PE=1 SV=1	12.7803	5	6	0	2	446	49.825	4.88	120.335	5
Q00839	Heterogeneous nuclear ribonucleoprotein U OS=Homo sapiens GN=HNRNPU PE=1 SV=6	5.33333	4	4	4	1	825	90.528	6	120.267	4
P00558	Phosphoglycerate kinase 1 OS=Homo sapiens GN=PGK1 PE=1 SV=3	16.307	5	5	5	1	417	44.586	8.1	119.28	5
Q9Y3M9	Zinc finger protein 337 OS=Homo sapiens GN=ZNF337 PE=1 SV=2	9.18775	4	5	4	1	751	86.819	9.66	119.14	4
P11021	78 kDa glucose-regulated protein OS=Homo sapiens GN=HSPA5 PE=1 SV=2	4.12844	2	3	1	1	654	72.288	5.16	119.087	2
O15015	Zinc finger protein 646 OS=Homo sapiens GN=ZNF646 PE=1 SV=1	4.7567	7	7	7	1	1829	200.636	7.33	118.773	7
Q17RY0	Cytoplasmic polyadenylation element-binding protein 4 OS=Homo sapiens GN=CPEB4 PE=1 SV=1	5.76132	3	4	3	1	729	80.102	7.18	117.78	3
P05455	Lupus La protein OS=Homo sapiens GN=SSB PE=1 SV=2	10.2941	4	4	4	1	408	46.808	7.12	117.557	4
Q08554	Desmocollin-1 OS=Homo sapiens GN=DSC1 PE=1 SV=2	6.4877	4	4	4	1	894	99.924	5.43	117.13	4
Q9HAH7	Probable fibrosin-1 OS=Homo sapiens GN=FBRS PE=1 SV=3	20.6522	6	8	6	1	460	48.358	9.95	117.08	6
Q02809	Procollagen-lysine,2-oxoglutarate 5-dioxygenase 1 OS=Homo sapiens GN=PLOD1 PE=1 SV=2	11.8294	7	7	7	1	727	83.497	6.95	116.833	7
P69905	Hemoglobin subunit alpha OS=Homo sapiens GN=HBA1 PE=1 SV=2	35.2113	4	5	4	1	142	15.248	8.68	116.08	4
A8MTY0	Zinc finger protein 724 OS=Homo sapiens GN=ZNF724 PE=2 SV=3	18.4168	8	11	4	1	619	71.126	9.11	115.42	8
Q14CN4	Keratin, type II cytoskeletal 72 OS=Homo sapiens GN=KRT72 PE=1 SV=2	7.04501	3	3	0	0	511	55.842	6.89	115.38	3
P68400	Casein kinase II subunit alpha OS=Homo sapiens GN=CSNK2A1 PE=1 SV=1	7.16113	2	3	2	1	391	45.115	7.74	114.623	2
Q8NEV1	Casein kinase II subunit alpha 3 OS=Homo sapiens GN=CSNK2A3 PE=1 SV=2	7.16113	2	3	2	1	391	45.191	8.5	114.623	2
P10599	Thioredoxin OS=Homo sapiens GN=TXN PE=1 SV=3	32.381	3	3	3	1	105	11.73	4.92	113.95	3
Q02790	Peptidyl-prolyl cis-trans isomerase FKBP4 OS=Homo sapiens GN=FKBP4 PE=1 SV=3	8.27887	4	4	4	1	459	51.772	5.43	113.907	4
Q12905	Interleukin enhancer-binding factor 2 OS=Homo sapiens GN=ILF2 PE=1 SV=2	18.2051	5	5	5	1	390	43.035	5.26	113.6	5
P25490	Transcriptional repressor protein YY1 OS=Homo sapiens GN=YY1 PE=1 SV=2	15.4589	5	5	5	1	414	44.685	6.25	113.56	5
P46783	40S ribosomal protein S10 OS=Homo sapiens GN=RPS10 PE=1 SV=1	20	4	4	4	1	165	18.886	10.15	113.36	4
O43167	Zinc finger and BTB domain-containing protein 24 OS=Homo sapiens GN=ZBTB24 PE=1 SV=2	7.89096	4	4	4	1	697	78.233	7.61	113.193	4
P17098	Zinc finger protein 8 OS=Homo sapiens GN=ZNF8 PE=1 SV=2	9.21739	5	5	5	1	575	64.93	7.39	112.106	5
A6NNY8	Ubiquitin carboxyl-terminal hydrolase 27 OS=Homo sapiens GN=USP27X PE=2 SV=3	7.53425	3	3	3	1	438	49.598	7.18	111.96	3
Q8TF20	Zinc finger protein 721 OS=Homo sapiens GN=ZNF721 PE=2 SV=2	14.1603	8	9	7	1	911	105.016	9.45	111.59	8
P0CJ79	Zinc finger protein 888 OS=Homo sapiens GN=ZNF888 PE=3 SV=1	12.6	5	5	2	1	500	58.689	9.09	110.58	5
Q9C086	INO80 complex subunit B OS=Homo sapiens GN=INO80B PE=1 SV=2	7.02247	2	2	2	1	356	38.613	9.61	110.23	2
P61962	DDB1- and CUL4-associated factor 7 OS=Homo sapiens GN=DCAF7 PE=1 SV=1	10.8187	3	3	3	1	342	38.901	5.52	110.02	3
Q9H361	Polyadenylate-binding protein 3 OS=Homo sapiens GN=PABPC3 PE=1 SV=2	6.97306	4	4	4	1	631	69.987	9.67	109.809	4
Q8WV44	E3 ubiquitin-protein ligase TRIM41 OS=Homo sapiens GN=TRIM41 PE=1 SV=3	9.36508	5	5	5	1	630	71.625	5.06	109.08	5
P02042	Hemoglobin subunit delta OS=Homo sapiens GN=HBD PE=1 SV=2	31.9728	4	7	4	1	147	16.045	8.05	108.88	4
Q96KK5	Histone H2A type 1-H OS=Homo sapiens GN=HIST1H2AH PE=1 SV=3	20.3125	2	3	1	1	128	13.898	10.89	107.696	2
Q99878	Histone H2A type 1-J OS=Homo sapiens GN=HIST1H2AJ PE=1 SV=3	20.3125	2	3	1	1	128	13.928	10.89	107.696	2
Q16777	Histone H2A type 2-C OS=Homo sapiens GN=HIST2H2AC PE=1 SV=4	20.155	2	3	1	1	129	13.98	10.9	107.696	2
Q9BTM1	Histone H2A.J OS=Homo sapiens GN=H2AFJ PE=1 SV=1	20.155	2	3	1	1	129	14.011	10.9	107.696	2
P0C0S8	Histone H2A type 1 OS=Homo sapiens GN=HIST1H2AG PE=1 SV=2	20	2	3	1	1	130	14.083	10.9	107.696	2
Q6FI13	Histone H2A type 2-A OS=Homo sapiens GN=HIST2H2AA3 PE=1 SV=3	20	2	3	1	1	130	14.087	10.9	107.696	2
Q93077	Histone H2A type 1-C OS=Homo sapiens GN=HIST1H2AC PE=1 SV=3	20	2	3	1	1	130	14.097	11.05	107.696	2
P20671	Histone H2A type 1-D OS=Homo sapiens GN=HIST1H2AD PE=1 SV=2	20	2	3	1	1	130	14.099	10.9	107.696	2
Q7L7L0	Histone H2A type 3 OS=Homo sapiens GN=HIST3H2A PE=1 SV=3	20	2	3	1	1	130	14.113	11.05	107.696	2
P04908	Histone H2A type 1-B/E OS=Homo sapiens GN=HIST1H2AB PE=1 SV=2	20	2	3	1	1	130	14.127	11.05	107.696	2
P62258	14-3-3 protein epsilon OS=Homo sapiens GN=YWHAE PE=1 SV=1	23.5294	4	4	4	1	255	29.155	4.74	107.503	4
P17035	Zinc finger protein 28 OS=Homo sapiens GN=ZNF28 PE=2 SV=5	5.71031	4	4	2	1	718	83.604	9.03	107.13	4
Q9Y3F4	Serine-threonine kinase receptor-associated protein OS=Homo sapiens GN=STRAP PE=1 SV=1	12.2857	3	4	3	1	350	38.414	5.12	106.97	3
O14647	Chromodomain-helicase-DNA-binding protein 2 OS=Homo sapiens GN=CHD2 PE=1 SV=2	4.10284	8	9	3	1	1828	211.214	8.1	106.62	8
Q15717	ELAV-like protein 1 OS=Homo sapiens GN=ELAVL1 PE=1 SV=2	10.1227	3	3	3	1	326	36.069	9.17	106.557	3
P62987	Ubiquitin-60S ribosomal protein L40 OS=Homo sapiens GN=UBA52 PE=1 SV=2	17.1875	3	4	3	1	128	14.719	9.83	106.32	3
P62979	Ubiquitin-40S ribosomal protein S27a OS=Homo sapiens GN=RPS27A PE=1 SV=2	14.1026	3	4	3	1	156	17.953	9.64	106.32	3
P0CG47	Polyubiquitin-B OS=Homo sapiens GN=UBB PE=1 SV=1	28.821	3	4	3	1	229	25.746	7.43	106.32	3
P0CG48	Polyubiquitin-C OS=Homo sapiens GN=UBC PE=1 SV=3	28.9051	3	4	3	1	685	76.992	7.66	106.32	3
Q8NCK3	Zinc finger protein 485 OS=Homo sapiens GN=ZNF485 PE=2 SV=1	5.66893	2	5	1	1	441	50.248	9.6	105.968	2
Q9Y6M7	Sodium bicarbonate cotransporter 3 OS=Homo sapiens GN=SLC4A7 PE=1 SV=2	3.78913	3	3	3	1	1214	135.957	6.71	105.83	3
P30050	60S ribosomal protein L12 OS=Homo sapiens GN=RPL12 PE=1 SV=1	14.5455	2	3	2	1	165	17.808	9.42	105.57	2
P32119	Peroxiredoxin-2 OS=Homo sapiens GN=PRDX2 PE=1 SV=5	23.2323	4	5	3	1	198	21.878	5.97	105.46	4
P49959	Double-strand break repair protein MRE11A OS=Homo sapiens GN=MRE11A PE=1 SV=3	11.1582	6	7	6	1	708	80.543	5.9	104.57	6
P40222	Alpha-taxilin OS=Homo sapiens GN=TXLNA PE=1 SV=3	3.47985	1	1	1	1	546	61.853	6.52	103.58	1
P09651	Heterogeneous nuclear ribonucleoprotein A1 OS=Homo sapiens GN=HNRNPA1 PE=1 SV=5	9.4086	3	3	2	1	372	38.723	9.13	103.504	3
P0CJ78	Zinc finger protein 865 OS=Homo sapiens GN=ZNF865 PE=3 SV=1	4.53258	4	4	4	1	1059	111.006	9.19	103.01	4
P57078	Receptor-interacting serine/threonine-protein kinase 4 OS=Homo sapiens GN=RIPK4 PE=1 SV=1	6.37019	5	5	5	1	832	91.553	7.17	102.74	5
P62805	Histone H4 OS=Homo sapiens GN=HIST1H4A PE=1 SV=2	40.7767	4	4	4	1	103	11.36	11.36	102.29	4
Q9NSD4	Zinc finger protein 275 OS=Homo sapiens GN=ZNF275 PE=1 SV=2	17.2494	6	6	6	1	429	48.412	9.09	102.277	6
O60481	Zinc finger protein ZIC 3 OS=Homo sapiens GN=ZIC3 PE=1 SV=1	13.4904	4	4	3	1	467	50.537	8.65	101.88	4
Q8NB42	Zinc finger protein 527 OS=Homo sapiens GN=ZNF527 PE=2 SV=2	7.06076	4	5	1	0	609	70.856	8.03	101.798	4
Q8TD17	Zinc finger protein 398 OS=Homo sapiens GN=ZNF398 PE=1 SV=1	4.82866	3	4	3	1	642	71.266	6.67	101.47	3
Q969P6	DNA topoisomerase I, mitochondrial OS=Homo sapiens GN=TOP1MT PE=1 SV=1	6.3228	5	6	5	1	601	69.828	9.41	101.333	5
Q6ZNH5	Zinc finger protein 497 OS=Homo sapiens GN=ZNF497 PE=2 SV=2	5.62249	2	2	2	1	498	54.686	8.94	101.26	2
Q9BVS4	Serine/threonine-protein kinase RIO2 OS=Homo sapiens GN=RIOK2 PE=1 SV=2	6.7029	2	2	2	1	552	63.243	5.94	101.19	2
O60763	General vesicular transport factor p115 OS=Homo sapiens GN=USO1 PE=1 SV=2	1.8711	1	1	1	1	962	107.828	4.91	100.89	1
A6NNZ2	Tubulin beta-8 chain-like protein LOC260334 OS=Homo sapiens PE=1 SV=1	9.68468	4	4	0	2	444	49.541	4.86	100.845	4
P17036	Zinc finger protein 3 OS=Homo sapiens GN=ZNF3 PE=1 SV=3	16.8161	3	5	0	0	446	50.884	7.52	100.813	3
O94900	Thymocyte selection-associated high mobility group box protein TOX OS=Homo sapiens GN=TOX PE=2 SV=3	5.70342	2	2	2	1	526	57.476	7.33	100.36	2
P60842	Eukaryotic initiation factor 4A-I OS=Homo sapiens GN=EIF4A1 PE=1 SV=1	8.62069	3	3	3	1	406	46.125	5.48	100.263	3
P05109	Protein S100-A8 OS=Homo sapiens GN=S100A8 PE=1 SV=1	11.828	1	2	1	1	93	10.828	7.03	99.83	1
Q15942	Zyxin OS=Homo sapiens GN=ZYX PE=1 SV=1	7.69231	2	3	2	1	572	61.238	6.67	99.23	2
Q9GZP4	PITH domain-containing protein 1 OS=Homo sapiens GN=PITHD1 PE=1 SV=1	14.218	2	2	2	1	211	24.163	5.74	98.74	2
Q9UQM7	Calcium/calmodulin-dependent protein kinase type II subunit alpha OS=Homo sapiens GN=CAMK2A PE=1 SV=2	6.27615	3	4	1	1	478	54.054	7.08	98.387	3
Q92901	60S ribosomal protein L3-like OS=Homo sapiens GN=RPL3L PE=2 SV=3	4.4226	2	3	2	1	407	46.267	10.45	98.38	2
P62241	40S ribosomal protein S8 OS=Homo sapiens GN=RPS8 PE=1 SV=2	10.5769	2	3	2	1	208	24.19	10.32	96.9667	2
Q8N823	Zinc finger protein 611 OS=Homo sapiens GN=ZNF611 PE=2 SV=2	4.53901	2	2	2	1	705	81.397	8.9	96.88	2
Q52LJ0	Protein FAM98B OS=Homo sapiens GN=FAM98B PE=1 SV=1	4.24242	1	2	1	1	330	37.167	6.29	96.53	1
Q32MZ4	Leucine-rich repeat flightless-interacting protein 1 OS=Homo sapiens GN=LRRFIP1 PE=1 SV=2	3.09406	2	2	2	1	808	89.199	4.65	96.23	2
Q9Y2D9	Zinc finger protein 652 OS=Homo sapiens GN=ZNF652 PE=1 SV=3	5.11551	3	3	3	1	606	69.699	8.65	95.83	3
Q8N4C8	Misshapen-like kinase 1 OS=Homo sapiens GN=MINK1 PE=1 SV=2	2.4024	3	3	3	1	1332	149.729	7.85	95.54	3
Q9UKE5	TRAF2 and NCK-interacting protein kinase OS=Homo sapiens GN=TNIK PE=1 SV=1	2.35294	3	3	3	1	1360	154.848	7.17	95.54	3
P17023	Zinc finger protein 19 OS=Homo sapiens GN=ZNF19 PE=2 SV=4	6.55022	1	3	0	7	458	52.415	7.8	95.5285	1
Q96NJ6	Zinc finger protein 3 homolog OS=Homo sapiens GN=ZFP3 PE=2 SV=1	5.9761	2	4	0	1	502	57.625	7.34	95.5285	2
Q8NF99	Zinc finger protein 397 OS=Homo sapiens GN=ZNF397 PE=1 SV=2	2.80899	1	3	0	7	534	61.1	7.27	95.5285	1
Q8N883	Zinc finger protein 614 OS=Homo sapiens GN=ZNF614 PE=1 SV=2	2.5641	1	3	0	7	585	67.171	9.04	95.5285	1
Q9P0L1	Zinc finger protein with KRAB and SCAN domains 7 OS=Homo sapiens GN=ZKSCAN7 PE=1 SV=2	3.97878	1	3	0	7	754	84.979	7.47	95.5285	1
Q4V348	Zinc finger protein 658B OS=Homo sapiens GN=ZNF658B PE=2 SV=1	7.69231	2	4	1	1	819	94.27	8.56	95.5285	2
Q5TYW1	Zinc finger protein 658 OS=Homo sapiens GN=ZNF658 PE=2 SV=2	5.94901	3	6	2	1	1059	122.196	8.28	95.5285	3
P62750	60S ribosomal protein L23a OS=Homo sapiens GN=RPL23A PE=1 SV=1	32.0513	5	5	5	1	156	17.684	10.45	95.22	5
P63244	Receptor of activated protein C kinase 1 OS=Homo sapiens GN=RACK1 PE=1 SV=3	25.5521	7	7	7	1	317	35.055	7.69	94.59	7
Q6UWP8	Suprabasin OS=Homo sapiens GN=SBSN PE=1 SV=2	3.05085	1	1	1	1	590	60.505	7.01	94.56	1
Q8N720	Zinc finger protein 655 OS=Homo sapiens GN=ZNF655 PE=1 SV=3	11.609	5	5	5	1	491	57.371	7.14	94.4133	5
Q86Y25	Zinc finger protein 354C OS=Homo sapiens GN=ZNF354C PE=2 SV=1	2.70758	1	3	1	1	554	64.805	8.05	93.7485	1
Q9UJW8	Zinc finger protein 180 OS=Homo sapiens GN=ZNF180 PE=1 SV=2	4.33526	1	2	1	1	692	79.061	7.8	93.7485	1
Q9HCZ1	Zinc finger protein 334 OS=Homo sapiens GN=ZNF334 PE=2 SV=2	2.20588	1	2	1	1	680	79.597	9.16	93.7485	1
P0CG24	Zinc finger protein 883 OS=Homo sapiens GN=ZNF883 PE=2 SV=1	7.91557	2	4	1	0	379	43.938	8.69	93.398	2
Q86W11	Zinc finger and SCAN domain-containing protein 30 OS=Homo sapiens GN=ZSCAN30 PE=1 SV=1	6.07287	2	4	1	0	494	56.328	6.7	93.398	2
P49407	Beta-arrestin-1 OS=Homo sapiens GN=ARRB1 PE=1 SV=2	12.201	4	5	3	1	418	47.036	6.2	92.9833	4
Q9UII5	Zinc finger protein 107 OS=Homo sapiens GN=ZNF107 PE=2 SV=1	18.5185	7	13	6	1	783	90.614	9.31	92.678	7
Q9HCK8	Chromodomain-helicase-DNA-binding protein 8 OS=Homo sapiens GN=CHD8 PE=1 SV=5	2.05347	4	4	3	1	2581	290.338	6.47	92.49	4
A5YKK6	CCR4-NOT transcription complex subunit 1 OS=Homo sapiens GN=CNOT1 PE=1 SV=2	1.72559	4	4	4	1	2376	266.768	7.11	92.3339	4
O43583	Density-regulated protein OS=Homo sapiens GN=DENR PE=1 SV=2	9.09091	1	1	1	1	198	22.078	5.3	91.75	1
P15170	Eukaryotic peptide chain release factor GTP-binding subunit ERF3A OS=Homo sapiens GN=GSPT1 PE=1 SV=1	6.61323	3	3	3	1	499	55.72	5.62	91.6367	3
O94973	AP-2 complex subunit alpha-2 OS=Homo sapiens GN=AP2A2 PE=1 SV=2	2.9819	2	2	2	1	939	103.895	6.96	91.32	2
Q2Q1W2	E3 ubiquitin-protein ligase TRIM71 OS=Homo sapiens GN=TRIM71 PE=1 SV=1	8.29493	5	5	5	1	868	93.326	7.61	91.19	5
Q99504	Eyes absent homolog 3 OS=Homo sapiens GN=EYA3 PE=1 SV=3	3.31588	1	1	1	1	573	62.624	5.21	90.28	1
Q6PKG0	La-related protein 1 OS=Homo sapiens GN=LARP1 PE=1 SV=2	7.93796	8	8	8	1	1096	123.434	8.82	90.19	8
Q13642	Four and a half LIM domains protein 1 OS=Homo sapiens GN=FHL1 PE=1 SV=4	7.12074	2	2	2	1	323	36.239	8.97	90.16	2
P36969	Phospholipid hydroperoxide glutathione peroxidase, mitochondrial OS=Homo sapiens GN=GPX4 PE=1 SV=3	18.2741	3	3	3	1	197	22.161	8.37	89.03	3
P0CG39	POTE ankyrin domain family member J OS=Homo sapiens GN=POTEJ PE=3 SV=1	3.27553	3	4	1	1	1038	117.315	5.97	88.49	3
P0CG38	POTE ankyrin domain family member I OS=Homo sapiens GN=POTEI PE=3 SV=1	3.16279	3	4	1	1	1075	121.205	6.21	88.49	3
P26373	60S ribosomal protein L13 OS=Homo sapiens GN=RPL13 PE=1 SV=4	18.0095	4	5	4	1	211	24.247	11.65	88.3967	4
Q14588	Zinc finger protein 234 OS=Homo sapiens GN=ZNF234 PE=2 SV=3	5.28571	3	3	1	1	700	80.507	8.63	88.1618	3
P52747	Zinc finger protein 143 OS=Homo sapiens GN=ZNF143 PE=1 SV=2	2.66458	2	2	2	1	638	68.853	6.05	88.1	2
P43243	Matrin-3 OS=Homo sapiens GN=MATR3 PE=1 SV=2	5.549	3	3	3	1	847	94.565	6.25	87.32	3
Q71UI9	Histone H2A.V OS=Homo sapiens GN=H2AFV PE=1 SV=3	24.2188	3	4	2	1	128	13.501	10.58	87.2911	3
P0C0S5	Histone H2A.Z OS=Homo sapiens GN=H2AFZ PE=1 SV=2	24.2188	3	4	2	1	128	13.545	10.58	87.2911	3
Q9Y5A9	YTH domain-containing family protein 2 OS=Homo sapiens GN=YTHDF2 PE=1 SV=2	6.73575	4	6	1	1	579	62.296	8.79	87.05	4
Q7Z739	YTH domain-containing family protein 3 OS=Homo sapiens GN=YTHDF3 PE=1 SV=1	8.71795	5	7	2	1	585	63.822	9.04	86.7967	5
O00193	Small acidic protein OS=Homo sapiens GN=SMAP PE=1 SV=1	8.74317	1	1	1	1	183	20.32	4.72	86.59	1
P49915	GMP synthase [glutamine-hydrolyzing] OS=Homo sapiens GN=GMPS PE=1 SV=1	16.7388	7	7	7	1	693	76.667	6.87	86.16	7
Q8N8E2	Zinc finger protein 513 OS=Homo sapiens GN=ZNF513 PE=1 SV=2	2.40296	1	1	1	1	541	57.844	7.52	85.94	1
Q3SY84	Keratin, type II cytoskeletal 71 OS=Homo sapiens GN=KRT71 PE=1 SV=3	4.0153	2	2	0	0	523	57.256	6.61	85.66	2
Q7RTS7	Keratin, type II cytoskeletal 74 OS=Homo sapiens GN=KRT74 PE=1 SV=2	3.96975	2	2	0	0	529	57.83	7.71	85.66	2
Q86Y46	Keratin, type II cytoskeletal 73 OS=Homo sapiens GN=KRT73 PE=1 SV=1	3.88889	2	2	0	0	540	58.887	7.23	85.66	2
Q9NQ39	Putative 40S ribosomal protein S10-like OS=Homo sapiens GN=RPS10P5 PE=5 SV=1	13.6364	3	3	3	1	176	20.108	10.13	84.64	3
Q86X95	Corepressor interacting with RBPJ 1 OS=Homo sapiens GN=CIR1 PE=1 SV=1	4.44444	2	3	2	1	450	52.281	9.86	84.4	2
O43435	T-box transcription factor TBX1 OS=Homo sapiens GN=TBX1 PE=1 SV=1	11.809	4	5	4	1	398	43.105	8.16	84.35	4
Q499Z4	Zinc finger protein 672 OS=Homo sapiens GN=ZNF672 PE=2 SV=2	5.75221	2	2	2	1	452	50.192	9.89	84.34	2
P31689	DnaJ homolog subfamily A member 1 OS=Homo sapiens GN=DNAJA1 PE=1 SV=2	6.54912	2	3	2	1	397	44.839	7.08	84.27	2
Q7Z6E9	E3 ubiquitin-protein ligase RBBP6 OS=Homo sapiens GN=RBBP6 PE=1 SV=1	4.52009	7	7	7	1	1792	201.442	9.64	84.2088	7
Q9H4B7	Tubulin beta-1 chain OS=Homo sapiens GN=TUBB1 PE=1 SV=1	4.43459	2	2	0	2	451	50.295	5.17	84.15	2
O60765	Zinc finger protein 354A OS=Homo sapiens GN=ZNF354A PE=2 SV=2	8.59504	4	4	2	1	605	69.193	9.57	84.14	4
P17844	Probable ATP-dependent RNA helicase DDX5 OS=Homo sapiens GN=DDX5 PE=1 SV=1	10.9121	5	5	4	1	614	69.105	8.92	83.36	5
P55201	Peregrin OS=Homo sapiens GN=BRPF1 PE=1 SV=2	3.37727	5	5	5	1	1214	137.412	7.93	83.1775	5
P62937	Peptidyl-prolyl cis-trans isomerase A OS=Homo sapiens GN=PPIA PE=1 SV=2	12.1212	2	2	2	1	165	18.001	7.81	82.88	2
Q96P63	Serpin B12 OS=Homo sapiens GN=SERPINB12 PE=1 SV=1	13.3333	4	4	4	1	405	46.247	5.53	82.8613	4
P17019	Zinc finger protein 708 OS=Homo sapiens GN=ZNF708 PE=1 SV=5	11.8236	3	4	1	1	499	57.32	9.39	82.5567	3
Q9Y2G7	Zinc finger protein 30 homolog OS=Homo sapiens GN=ZFP30 PE=2 SV=1	19.8459	6	7	4	1	519	61.518	8.91	82.4547	6
Q9NV06	DDB1- and CUL4-associated factor 13 OS=Homo sapiens GN=DCAF13 PE=1 SV=2	8.76404	4	4	4	1	445	51.369	9.19	82.44	4
Q92841	Probable ATP-dependent RNA helicase DDX17 OS=Homo sapiens GN=DDX17 PE=1 SV=2	3.29218	2	2	1	1	729	80.222	8.27	82.06	2
P05386	60S acidic ribosomal protein P1 OS=Homo sapiens GN=RPLP1 PE=1 SV=1	28.9474	2	2	1	1	114	11.507	4.32	80.7844	2
O75437	Zinc finger protein 254 OS=Homo sapiens GN=ZNF254 PE=2 SV=3	12.1396	5	5	2	0	659	77.11	9.28	80.57	5
Q9UJN7	Zinc finger protein 391 OS=Homo sapiens GN=ZNF391 PE=2 SV=2	9.49721	2	3	2	1	358	40.634	8.6	79.8767	2
Q86V71	Zinc finger protein 429 OS=Homo sapiens GN=ZNF429 PE=2 SV=2	4.89614	3	3	0	0	674	78.102	9.39	79.2491	3
Q9NR30	Nucleolar RNA helicase 2 OS=Homo sapiens GN=DDX21 PE=1 SV=5	8.3014	6	6	6	1	783	87.29	9.28	78.864	6
P30086	Phosphatidylethanolamine-binding protein 1 OS=Homo sapiens GN=PEBP1 PE=1 SV=3	15.508	2	2	2	1	187	21.044	7.53	78.72	2
Q14562	ATP-dependent RNA helicase DHX8 OS=Homo sapiens GN=DHX8 PE=1 SV=1	0.737705	1	2	0	2	1220	139.227	8.32	78.52	1
Q5JU85	IQ motif and SEC7 domain-containing protein 2 OS=Homo sapiens GN=IQSEC2 PE=1 SV=1	1.82679	3	3	3	1	1478	161.637	8.56	78.45	3
P78312	Protein FAM193A OS=Homo sapiens GN=FAM193A PE=1 SV=2	6.40316	6	6	6	1	1265	139.901	6.48	77.84	6
P62244	40S ribosomal protein S15a OS=Homo sapiens GN=RPS15A PE=1 SV=2	22.3077	2	2	2	1	130	14.83	10.13	77.68	2
P46109	Crk-like protein OS=Homo sapiens GN=CRKL PE=1 SV=1	16.5017	4	4	4	1	303	33.756	6.74	77.5667	4
O75123	Zinc finger protein 623 OS=Homo sapiens GN=ZNF623 PE=2 SV=2	3.73134	2	2	2	1	536	61.353	8.16	77.39	2
P49761	Dual specificity protein kinase CLK3 OS=Homo sapiens GN=CLK3 PE=1 SV=3	5.64263	4	4	4	1	638	73.469	9.92	77.12	4
P06753	Tropomyosin alpha-3 chain OS=Homo sapiens GN=TPM3 PE=1 SV=2	8.07018	2	2	2	1	285	32.93	4.72	77.0685	2
P04075	Fructose-bisphosphate aldolase A OS=Homo sapiens GN=ALDOA PE=1 SV=2	14.011	3	3	3	1	364	39.395	8.09	76.6967	3
P49711	Transcriptional repressor CTCF OS=Homo sapiens GN=CTCF PE=1 SV=1	8.39065	5	6	5	1	727	82.732	6.96	76.69	5
Q9Y520	Protein PRRC2C OS=Homo sapiens GN=PRRC2C PE=1 SV=4	0.89779	2	2	2	1	2896	316.718	9.13	76.53	2
Q8ND24	RING finger protein 214 OS=Homo sapiens GN=RNF214 PE=1 SV=2	4.12518	2	2	2	1	703	77.619	6.95	76.43	2
O95201	Zinc finger protein 205 OS=Homo sapiens GN=ZNF205 PE=1 SV=2	5.77617	2	2	2	1	554	60.592	8.54	76.34	2
O43670	BUB3-interacting and GLEBS motif-containing protein ZNF207 OS=Homo sapiens GN=ZNF207 PE=1 SV=1	5.43933	2	3	2	1	478	50.717	9.1	76.3267	2
P07355	Annexin A2 OS=Homo sapiens GN=ANXA2 PE=1 SV=2	13.5693	4	4	4	1	339	38.58	7.75	76.14	4
A6NMY6	Putative annexin A2-like protein OS=Homo sapiens GN=ANXA2P2 PE=5 SV=2	13.5693	4	4	4	1	339	38.635	6.95	76.14	4
P36402	Transcription factor 7 OS=Homo sapiens GN=TCF7 PE=1 SV=3	6.25	2	2	2	1	384	41.616	6.81	76.05	2
Q9UJU2	Lymphoid enhancer-binding factor 1 OS=Homo sapiens GN=LEF1 PE=1 SV=1	6.01504	2	2	2	1	399	44.173	7.42	76.05	2
Q9NQB0	Transcription factor 7-like 2 OS=Homo sapiens GN=TCF7L2 PE=1 SV=2	3.87722	2	2	2	1	619	67.876	8.53	76.05	2
P07205	Phosphoglycerate kinase 2 OS=Homo sapiens GN=PGK2 PE=1 SV=3	7.91367	2	2	2	1	417	44.767	8.54	75.95	2
Q5VIY5	Zinc finger protein 468 OS=Homo sapiens GN=ZNF468 PE=2 SV=1	5.9387	3	3	1	1	522	60.534	8.82	75.8333	3
P60866	40S ribosomal protein S20 OS=Homo sapiens GN=RPS20 PE=1 SV=1	9.2437	1	2	1	1	119	13.364	9.94	75.75	1
O43823	A-kinase anchor protein 8 OS=Homo sapiens GN=AKAP8 PE=1 SV=1	2.89017	1	1	1	1	692	76.061	5.15	75.73	1
Q9Y5B9	FACT complex subunit SPT16 OS=Homo sapiens GN=SUPT16H PE=1 SV=1	4.58453	4	4	4	1	1047	119.838	5.66	74.92	4
Q5BJF6	Outer dense fiber protein 2 OS=Homo sapiens GN=ODF2 PE=1 SV=1	1.56815	1	1	1	1	829	95.342	7.62	73.99	1
O43175	D-3-phosphoglycerate dehydrogenase OS=Homo sapiens GN=PHGDH PE=1 SV=4	5.25328	2	2	2	1	533	56.614	6.71	73.96	2
P22102	Trifunctional purine biosynthetic protein adenosine-3 OS=Homo sapiens GN=GART PE=1 SV=1	8.41584	6	6	6	1	1010	107.699	6.7	73.86	6
Q8WXF0	Serine/arginine-rich splicing factor 12 OS=Homo sapiens GN=SRSF12 PE=2 SV=1	13.0268	3	4	3	1	261	30.494	11.69	73.45	3
Q9Y6A5	Transforming acidic coiled-coil-containing protein 3 OS=Homo sapiens GN=TACC3 PE=1 SV=1	4.17661	2	2	2	1	838	90.304	5.05	73.39	2
P11413	Glucose-6-phosphate 1-dehydrogenase OS=Homo sapiens GN=G6PD PE=1 SV=4	4.46602	2	3	2	1	515	59.219	6.84	73.17	2
P50914	60S ribosomal protein L14 OS=Homo sapiens GN=RPL14 PE=1 SV=4	5.5814	1	1	1	1	215	23.417	10.93	72.56	1
Q14568	Heat shock protein HSP 90-alpha A2 OS=Homo sapiens GN=HSP90AA2P PE=1 SV=2	9.32945	3	4	0	2	343	39.34	4.65	72.0933	3
Q04323	UBX domain-containing protein 1 OS=Homo sapiens GN=UBXN1 PE=1 SV=2	13.8047	2	2	2	1	297	33.305	5.25	71.87	2
O60506	Heterogeneous nuclear ribonucleoprotein Q OS=Homo sapiens GN=SYNCRIP PE=1 SV=2	6.09952	3	3	3	1	623	69.56	8.59	71.6767	3
Q8N8J6	Zinc finger protein 615 OS=Homo sapiens GN=ZNF615 PE=2 SV=2	7.11354	3	4	3	1	731	83.684	9.16	70.91	3
Q13765	Nascent polypeptide-associated complex subunit alpha OS=Homo sapiens GN=NACA PE=1 SV=1	13.4884	2	2	2	1	215	23.37	4.56	70.65	2
E9PAV3	Nascent polypeptide-associated complex subunit alpha, muscle-specific form OS=Homo sapiens GN=NACA PE=1 SV=1	1.39557	2	2	2	1	2078	205.295	9.58	70.65	2
Q9BWE0	Replication initiator 1 OS=Homo sapiens GN=REPIN1 PE=1 SV=1	4.93827	2	2	2	1	567	63.534	9.98	70.19	2
Q58FF6	Putative heat shock protein HSP 90-beta 4 OS=Homo sapiens GN=HSP90AB4P PE=5 SV=1	1.9802	1	1	0	2	505	58.228	4.73	70.03	1
Q9Y388	RNA-binding motif protein, X-linked 2 OS=Homo sapiens GN=RBMX2 PE=1 SV=2	12.1118	4	4	4	1	322	37.313	9.83	70.02	4
P04040	Catalase OS=Homo sapiens GN=CAT PE=1 SV=3	5.31309	2	2	2	1	527	59.719	7.39	69.63	2
Q5JTH9	RRP12-like protein OS=Homo sapiens GN=RRP12 PE=1 SV=2	2.92984	4	4	4	1	1297	143.611	8.75	69.57	4
Q13191	E3 ubiquitin-protein ligase CBL-B OS=Homo sapiens GN=CBLB PE=1 SV=2	1.83299	1	1	1	1	982	109.38	7.88	69.56	1
Q8IYD1	Eukaryotic peptide chain release factor GTP-binding subunit ERF3B OS=Homo sapiens GN=GSPT2 PE=1 SV=2	3.34395	2	2	2	1	628	68.84	5.43	69.32	2
P62308	Small nuclear ribonucleoprotein G OS=Homo sapiens GN=SNRPG PE=1 SV=1	15.7895	1	1	1	1	76	8.49	8.88	69.16	1
A8MWD9	Putative small nuclear ribonucleoprotein G-like protein 15 OS=Homo sapiens GN=SNRPGP15 PE=5 SV=2	15.7895	1	1	1	1	76	8.538	8.84	69.16	1
Q6EEV6	Small ubiquitin-related modifier 4 OS=Homo sapiens GN=SUMO4 PE=1 SV=2	12.6316	1	1	1	1	95	10.678	7.18	69.07	1
P61956	Small ubiquitin-related modifier 2 OS=Homo sapiens GN=SUMO2 PE=1 SV=3	12.6316	1	1	1	1	95	10.864	5.5	69.07	1
P55854	Small ubiquitin-related modifier 3 OS=Homo sapiens GN=SUMO3 PE=1 SV=2	11.6505	1	1	1	1	103	11.63	5.49	69.07	1
Q9Y266	Nuclear migration protein nudC OS=Homo sapiens GN=NUDC PE=1 SV=1	19.3353	5	5	5	1	331	38.219	5.38	68.84	5
Q96GE5	Zinc finger protein 799 OS=Homo sapiens GN=ZNF799 PE=2 SV=4	7.93157	4	4	4	1	643	74.24	9.09	68.8033	4
Q969J2	Zinc finger protein with KRAB and SCAN domains 4 OS=Homo sapiens GN=ZKSCAN4 PE=1 SV=1	5.68807	2	3	2	1	545	61.54	7.61	68.03	2
Q14593	Zinc finger protein 273 OS=Homo sapiens GN=ZNF273 PE=1 SV=3	8.78735	4	4	1	1	569	64.929	9.54	67.8833	4
P60174	Triosephosphate isomerase OS=Homo sapiens GN=TPI1 PE=1 SV=3	14.3357	3	3	3	1	286	30.772	5.92	67.83	3
Q14240	Eukaryotic initiation factor 4A-II OS=Homo sapiens GN=EIF4A2 PE=1 SV=2	5.89681	2	2	2	1	407	46.373	5.48	67.76	2
Q9H009	Nascent polypeptide-associated complex subunit alpha-2 OS=Homo sapiens GN=NACA2 PE=1 SV=1	6.97674	1	1	0	0	215	23.209	4.73	67.4	1
P19544	Wilms tumor protein OS=Homo sapiens GN=WT1 PE=1 SV=2	13.363	3	3	3	1	449	49.157	9	67.1033	3
Q8N184	Zinc finger protein 567 OS=Homo sapiens GN=ZNF567 PE=1 SV=3	3.55487	2	2	2	1	647	75.116	9.13	67.02	2
P18615	Negative elongation factor E OS=Homo sapiens GN=NELFE PE=1 SV=3	3.42105	1	1	1	1	380	43.214	9.33	66.92	1
P17987	T-complex protein 1 subunit alpha OS=Homo sapiens GN=TCP1 PE=1 SV=1	1.97842	1	1	1	1	556	60.306	6.11	66.79	1
Q14651	Plastin-1 OS=Homo sapiens GN=PLS1 PE=1 SV=2	4.13355	2	3	2	1	629	70.209	5.41	66.6167	2
Q6PCB5	Round spermatid basic protein 1-like protein OS=Homo sapiens GN=RSBN1L PE=1 SV=2	2.36407	2	3	2	1	846	94.81	8.78	66.56	2
P62249	40S ribosomal protein S16 OS=Homo sapiens GN=RPS16 PE=1 SV=2	19.1781	3	3	3	1	146	16.435	10.21	65.9433	3
P42677	40S ribosomal protein S27 OS=Homo sapiens GN=RPS27 PE=1 SV=3	38.0952	3	3	3	1	84	9.455	9.45	65.72	3
Q71UM5	40S ribosomal protein S27-like OS=Homo sapiens GN=RPS27L PE=1 SV=3	25	2	2	2	1	84	9.471	9.45	65.72	2
Q9UBP5	Hairy/enhancer-of-split related with YRPW motif protein 2 OS=Homo sapiens GN=HEY2 PE=1 SV=1	3.56083	1	2	1	1	337	35.786	8.16	65.58	1
P26196	Probable ATP-dependent RNA helicase DDX6 OS=Homo sapiens GN=DDX6 PE=1 SV=2	8.48861	2	3	2	1	483	54.382	8.66	65.3833	2
Q15397	Pumilio homolog 3 OS=Homo sapiens GN=PUM3 PE=1 SV=3	3.08642	2	2	2	1	648	73.538	9.64	65.29	2
P19013	Keratin, type II cytoskeletal 4 OS=Homo sapiens GN=KRT4 PE=1 SV=4	3.74532	2	3	0	0	534	57.25	6.61	65.25	2
Q8WXX7	Autism susceptibility gene 2 protein OS=Homo sapiens GN=AUTS2 PE=1 SV=1	4.05083	3	3	3	1	1259	138.897	9.38	64.78	3
P16403	Histone H1.2 OS=Homo sapiens GN=HIST1H1C PE=1 SV=2	9.38967	2	2	2	1	213	21.352	10.93	64.7	2
P10412	Histone H1.4 OS=Homo sapiens GN=HIST1H1E PE=1 SV=2	9.13242	2	2	2	1	219	21.852	11.03	64.7	2
P16402	Histone H1.3 OS=Homo sapiens GN=HIST1H1D PE=1 SV=2	9.04977	2	2	2	1	221	22.336	11.02	64.7	2
Q5C9Z4	Nucleolar MIF4G domain-containing protein 1 OS=Homo sapiens GN=NOM1 PE=1 SV=1	3.13953	2	2	2	1	860	96.198	8.1	64.7	2
Q16543	Hsp90 co-chaperone Cdc37 OS=Homo sapiens GN=CDC37 PE=1 SV=1	6.61376	2	2	2	1	378	44.44	5.25	64.36	2
P63208	S-phase kinase-associated protein 1 OS=Homo sapiens GN=SKP1 PE=1 SV=2	7.36196	1	1	1	1	163	18.646	4.54	64.23	1
Q8WUM4	Programmed cell death 6-interacting protein OS=Homo sapiens GN=PDCD6IP PE=1 SV=1	3.1106	2	2	2	1	868	95.963	6.52	64.13	2
P05388	60S acidic ribosomal protein P0 OS=Homo sapiens GN=RPLP0 PE=1 SV=1	6.94006	2	2	2	1	317	34.252	5.97	64.09	2
Q8NHW5	60S acidic ribosomal protein P0-like OS=Homo sapiens GN=RPLP0P6 PE=5 SV=1	6.94006	2	2	2	1	317	34.343	5.55	64.09	2
O95433	Activator of 90 kDa heat shock protein ATPase homolog 1 OS=Homo sapiens GN=AHSA1 PE=1 SV=1	9.46746	2	2	2	1	338	38.25	5.53	63.8365	2
P47914	60S ribosomal protein L29 OS=Homo sapiens GN=RPL29 PE=1 SV=2	9.43396	1	2	1	1	159	17.741	11.66	63.77	1
P61758	Prefoldin subunit 3 OS=Homo sapiens GN=VBP1 PE=1 SV=3	12.1827	2	2	2	1	197	22.643	7.11	63.73	2
P04080	Cystatin-B OS=Homo sapiens GN=CSTB PE=1 SV=2	45.9184	3	4	3	1	98	11.133	7.56	63.5233	3
O43390	Heterogeneous nuclear ribonucleoprotein R OS=Homo sapiens GN=HNRNPR PE=1 SV=1	1.89573	1	1	1	1	633	70.899	8.13	63.52	1
P15880	40S ribosomal protein S2 OS=Homo sapiens GN=RPS2 PE=1 SV=2	15.0171	4	4	4	1	293	31.305	10.24	62.96	4
P35637	RNA-binding protein FUS OS=Homo sapiens GN=FUS PE=1 SV=1	9.88593	3	3	3	1	526	53.394	9.36	62.6067	3
Q9UDV7	Zinc finger protein 282 OS=Homo sapiens GN=ZNF282 PE=1 SV=3	1.49031	1	2	1	1	671	74.248	5.9	62.5865	1
Q8IY63	Angiomotin-like protein 1 OS=Homo sapiens GN=AMOTL1 PE=1 SV=1	3.13808	4	4	4	1	956	106.508	7.11	62.5578	4
Q9Y463	Dual specificity tyrosine-phosphorylation-regulated kinase 1B OS=Homo sapiens GN=DYRK1B PE=1 SV=1	4.13355	4	4	4	1	629	69.154	9.13	62.3266	4
P62847	40S ribosomal protein S24 OS=Homo sapiens GN=RPS24 PE=1 SV=1	11.2782	1	1	1	1	133	15.413	10.78	62.13	1
Q96AE4	Far upstream element-binding protein 1 OS=Homo sapiens GN=FUBP1 PE=1 SV=3	6.8323	3	3	3	1	644	67.518	7.61	61.98	3
Q6IS14	Eukaryotic translation initiation factor 5A-1-like OS=Homo sapiens GN=EIF5AL1 PE=2 SV=2	12.3377	2	2	2	1	154	16.762	5	61.95	2
Q9GZV4	Eukaryotic translation initiation factor 5A-2 OS=Homo sapiens GN=EIF5A2 PE=1 SV=3	12.4183	2	2	2	1	153	16.782	5.58	61.95	2
P63241	Eukaryotic translation initiation factor 5A-1 OS=Homo sapiens GN=EIF5A PE=1 SV=2	12.3377	2	2	2	1	154	16.821	5.24	61.95	2
P55316	Forkhead box protein G1 OS=Homo sapiens GN=FOXG1 PE=1 SV=2	8.17996	2	2	2	1	489	52.32	8.87	61.8738	2
O14978	Zinc finger protein 263 OS=Homo sapiens GN=ZNF263 PE=1 SV=2	3.07467	1	1	1	1	683	77.25	6.99	61.79	1
Q9UBQ5	Eukaryotic translation initiation factor 3 subunit K OS=Homo sapiens GN=EIF3K PE=1 SV=1	8.25688	2	2	2	1	218	25.043	4.93	61.7319	2
P12955	Xaa-Pro dipeptidase OS=Homo sapiens GN=PEPD PE=1 SV=3	1.82556	1	1	1	1	493	54.513	6	61.35	1
P0CG31	Putative zinc finger protein 286B OS=Homo sapiens GN=ZNF286B PE=5 SV=1	4.40613	2	2	2	1	522	59.534	8.35	60.98	2
P62906	60S ribosomal protein L10a OS=Homo sapiens GN=RPL10A PE=1 SV=2	33.6406	6	6	6	1	217	24.816	9.94	60.84	6
Q9P0K8	Forkhead box protein J2 OS=Homo sapiens GN=FOXJ2 PE=1 SV=1	2.43902	1	1	1	1	574	62.356	6.7	60.77	1
P17040	Zinc finger and SCAN domain-containing protein 20 OS=Homo sapiens GN=ZSCAN20 PE=2 SV=3	1.43816	1	1	1	1	1043	117.467	6.43	60.54	1
O14744	Protein arginine N-methyltransferase 5 OS=Homo sapiens GN=PRMT5 PE=1 SV=4	2.04082	1	1	1	1	637	72.638	6.29	60.51	1
Q96L21	60S ribosomal protein L10-like OS=Homo sapiens GN=RPL10L PE=1 SV=3	10.7477	2	4	2	1	214	24.503	10.01	60.28	2
Q8WTT2	Nucleolar complex protein 3 homolog OS=Homo sapiens GN=NOC3L PE=1 SV=1	4.375	3	3	3	1	800	92.49	9.17	60.25	3
Q8TF68	Zinc finger protein 384 OS=Homo sapiens GN=ZNF384 PE=1 SV=2	7.62565	3	3	3	1	577	63.179	8.95	60.1833	3
Q8TD23	Zinc finger protein 675 OS=Homo sapiens GN=ZNF675 PE=1 SV=3	7.74648	3	4	2	1	568	66.256	8.87	60.09	3
P60228	Eukaryotic translation initiation factor 3 subunit E OS=Homo sapiens GN=EIF3E PE=1 SV=1	8.76404	4	4	4	1	445	52.187	6.04	59.8	4
P53365	Arfaptin-2 OS=Homo sapiens GN=ARFIP2 PE=1 SV=1	4.69208	1	1	1	1	341	37.832	6.04	59.62	1
P55196	Afadin OS=Homo sapiens GN=AFDN PE=1 SV=3	0.657895	1	1	1	1	1824	206.676	6.47	59.35	1
P23771	Trans-acting T-cell-specific transcription factor GATA-3 OS=Homo sapiens GN=GATA3 PE=1 SV=1	4.06321	1	1	1	1	443	47.885	9.42	59.32	1
P15374	Ubiquitin carboxyl-terminal hydrolase isozyme L3 OS=Homo sapiens GN=UCHL3 PE=1 SV=1	14.7826	2	3	2	1	230	26.166	4.92	59.3133	2
P61204	ADP-ribosylation factor 3 OS=Homo sapiens GN=ARF3 PE=1 SV=2	8.28729	1	1	1	1	181	20.588	7.43	59.28	1
P84077	ADP-ribosylation factor 1 OS=Homo sapiens GN=ARF1 PE=1 SV=2	8.28729	1	1	1	1	181	20.684	6.8	59.28	1
P14625	Endoplasmin OS=Homo sapiens GN=HSP90B1 PE=1 SV=1	1.4944	1	1	1	1	803	92.411	4.84	59.13	1
P52655	Transcription initiation factor IIA subunit 1 OS=Homo sapiens GN=GTF2A1 PE=1 SV=1	5.31915	2	2	2	1	376	41.488	4.55	59	2
P62899	60S ribosomal protein L31 OS=Homo sapiens GN=RPL31 PE=1 SV=1	17.6	2	2	2	1	125	14.454	10.54	58.96	2
P22626	Heterogeneous nuclear ribonucleoproteins A2/B1 OS=Homo sapiens GN=HNRNPA2B1 PE=1 SV=2	6.23229	2	3	1	1	353	37.407	8.95	58.9272	2
Q01844	RNA-binding protein EWS OS=Homo sapiens GN=EWSR1 PE=1 SV=1	3.65854	1	1	1	1	656	68.436	9.33	58.82	1
O43310	CBP80/20-dependent translation initiation factor OS=Homo sapiens GN=CTIF PE=1 SV=1	4.51505	2	2	2	1	598	67.544	6.54	58.78	2
P27348	14-3-3 protein theta OS=Homo sapiens GN=YWHAQ PE=1 SV=1	11.0204	2	3	1	1	245	27.747	4.78	58.69	2
Q96CX3	Zinc finger protein 501 OS=Homo sapiens GN=ZNF501 PE=2 SV=2	9.9631	3	3	3	1	271	31.158	9.19	58.6367	3
Q16610	Extracellular matrix protein 1 OS=Homo sapiens GN=ECM1 PE=1 SV=2	2.40741	1	1	1	1	540	60.635	6.71	58.58	1
Q9HCS4	Transcription factor 7-like 1 OS=Homo sapiens GN=TCF7L1 PE=2 SV=1	1.87075	1	1	1	1	588	62.592	8.94	58.38	1
Q08289	Voltage-dependent L-type calcium channel subunit beta-2 OS=Homo sapiens GN=CACNB2 PE=1 SV=3	1.81818	1	1	1	1	660	73.536	8.1	58.06	1
Q9BYJ9	YTH domain-containing family protein 1 OS=Homo sapiens GN=YTHDF1 PE=1 SV=1	3.22004	2	4	0	2	559	60.836	8.79	58.03	2
P35900	Keratin, type I cytoskeletal 20 OS=Homo sapiens GN=KRT20 PE=1 SV=1	2.59434	1	1	0	3	424	48.457	5.69	57.96	1
Q32P51	Heterogeneous nuclear ribonucleoprotein A1-like 2 OS=Homo sapiens GN=HNRNPA1L2 PE=2 SV=2	5.3125	2	2	1	1	320	34.204	9	57.8779	2
P06454	Prothymosin alpha OS=Homo sapiens GN=PTMA PE=1 SV=2	12.6126	1	1	1	1	111	12.196	3.78	57.8	1
O00425	Insulin-like growth factor 2 mRNA-binding protein 3 OS=Homo sapiens GN=IGF2BP3 PE=1 SV=2	2.41796	1	1	1	1	579	63.666	8.87	57.76	1
Q14592	Zinc finger protein 460 OS=Homo sapiens GN=ZNF460 PE=1 SV=2	8.71886	3	4	3	1	562	63.624	7.01	57.67	3
Q7L2H7	Eukaryotic translation initiation factor 3 subunit M OS=Homo sapiens GN=EIF3M PE=1 SV=1	3.47594	1	1	1	1	374	42.476	5.63	57.58	1
O60664	Perilipin-3 OS=Homo sapiens GN=PLIN3 PE=1 SV=3	3.68664	1	1	1	1	434	47.046	5.44	57.29	1
Q05481	Zinc finger protein 91 OS=Homo sapiens GN=ZNF91 PE=2 SV=2	11.0831	6	7	4	1	1191	137.128	9.32	57.18	6
Q03936	Zinc finger protein 92 OS=Homo sapiens GN=ZNF92 PE=2 SV=2	13.3106	4	4	1	0	586	68.442	9.28	57.1733	4
Q03923	Zinc finger protein 85 OS=Homo sapiens GN=ZNF85 PE=1 SV=3	13.1092	4	4	1	1	595	68.691	9.32	56.9867	4
O75333	T-box transcription factor TBX10 OS=Homo sapiens GN=TBX10 PE=2 SV=2	6.75325	2	3	1	0	385	42.315	9.28	56.58	2
Q5JVF3	PCI domain-containing protein 2 OS=Homo sapiens GN=PCID2 PE=1 SV=2	6.01504	2	2	2	1	399	46	8.53	56.32	2
Q9UHR5	SAP30-binding protein OS=Homo sapiens GN=SAP30BP PE=1 SV=1	4.87013	1	1	1	1	308	33.85	4.84	56.24	1
P81605	Dermcidin OS=Homo sapiens GN=DCD PE=1 SV=2	10	1	1	1	1	110	11.277	6.54	56.18	1
Q9Y2A4	Zinc finger protein 443 OS=Homo sapiens GN=ZNF443 PE=2 SV=2	5.81222	3	3	3	1	671	77.465	9.1	56.13	3
Q99543	DnaJ homolog subfamily C member 2 OS=Homo sapiens GN=DNAJC2 PE=1 SV=4	1.28824	1	1	1	1	621	71.952	8.7	56.11	1
Q96BV0	Zinc finger protein 775 OS=Homo sapiens GN=ZNF775 PE=2 SV=2	5.02793	2	2	2	1	537	59.714	10.17	56.01	2
P62995	Transformer-2 protein homolog beta OS=Homo sapiens GN=TRA2B PE=1 SV=1	5.90278	2	2	2	1	288	33.646	11.25	55.8885	2
P62910	60S ribosomal protein L32 OS=Homo sapiens GN=RPL32 PE=1 SV=2	17.7778	2	2	2	1	135	15.85	11.33	55.82	2
Q96MX3	Zinc finger protein 48 OS=Homo sapiens GN=ZNF48 PE=1 SV=2	20.2265	7	7	7	1	618	67.777	9.36	55.6367	7
P00441	Superoxide dismutase [Cu-Zn] OS=Homo sapiens GN=SOD1 PE=1 SV=2	9.09091	1	1	1	1	154	15.926	6.13	55.36	1
Q8WYQ9	Zinc finger CCHC domain-containing protein 14 OS=Homo sapiens GN=ZCCHC14 PE=2 SV=1	4.63646	3	3	3	1	949	99.979	8.18	55.24	3
Q5SVQ8	Zinc finger and BTB domain-containing protein 41 OS=Homo sapiens GN=ZBTB41 PE=1 SV=1	2.64026	2	2	2	1	909	105.125	7.93	55.08	2
Q99832	T-complex protein 1 subunit eta OS=Homo sapiens GN=CCT7 PE=1 SV=2	2.20994	1	1	1	1	543	59.329	7.65	55.05	1
P62826	GTP-binding nuclear protein Ran OS=Homo sapiens GN=RAN PE=1 SV=3	11.5741	2	2	2	1	216	24.408	7.49	54.96	2
Q14586	Zinc finger protein 267 OS=Homo sapiens GN=ZNF267 PE=1 SV=3	1.61507	1	1	1	1	743	87.32	8.91	54.86	1
Q8WXF1	Paraspeckle component 1 OS=Homo sapiens GN=PSPC1 PE=1 SV=1	4.0153	2	2	1	1	523	58.706	6.67	54.8355	2
Q96BK5	PIN2/TERF1-interacting telomerase inhibitor 1 OS=Homo sapiens GN=PINX1 PE=1 SV=2	10.061	2	2	2	1	328	37.012	9.6	54.68	2
P42772	Cyclin-dependent kinase 4 inhibitor B OS=Homo sapiens GN=CDKN2B PE=1 SV=1	8.69565	1	1	1	1	138	14.713	6.54	54.63	1
Q7Z398	Zinc finger protein 550 OS=Homo sapiens GN=ZNF550 PE=1 SV=2	3.31754	1	1	1	1	422	48.35	8.63	54.22	1
P62306	Small nuclear ribonucleoprotein F OS=Homo sapiens GN=SNRPF PE=1 SV=1	15.1163	1	1	1	1	86	9.719	4.67	54.1	1
Q8IYN0	Zinc finger protein 100 OS=Homo sapiens GN=ZNF100 PE=2 SV=2	5.53506	3	3	2	1	542	62.704	8.94	54.07	3
P62913	60S ribosomal protein L11 OS=Homo sapiens GN=RPL11 PE=1 SV=2	12.9213	2	2	2	1	178	20.24	9.6	53.67	2
P36508	Zinc finger protein 76 OS=Homo sapiens GN=ZNF76 PE=2 SV=2	1.57895	1	1	1	1	570	61.792	6.05	53.33	1
Q9NQZ8	Endothelial zinc finger protein induced by tumor necrosis factor alpha OS=Homo sapiens GN=ZNF71 PE=2 SV=1	7.97546	3	3	3	1	489	54.462	8.68	53.27	3
Q8IUF8	Bifunctional lysine-specific demethylase and histidyl-hydroxylase MINA OS=Homo sapiens GN=MINA PE=1 SV=1	4.30108	2	2	2	1	465	52.767	6.7	53.24	2
O15083	ERC protein 2 OS=Homo sapiens GN=ERC2 PE=1 SV=3	3.0303	2	2	2	1	957	110.49	6.99	52.86	2
Q8IVM0	Coiled-coil domain-containing protein 50 OS=Homo sapiens GN=CCDC50 PE=1 SV=1	3.92157	1	1	1	1	306	35.8	6.65	52.84	1
Q92922	SWI/SNF complex subunit SMARCC1 OS=Homo sapiens GN=SMARCC1 PE=1 SV=3	5.88235	3	3	3	1	1105	122.79	5.76	52.63	3
Q6ZNG1	Zinc finger protein 600 OS=Homo sapiens GN=ZNF600 PE=1 SV=2	4.15512	2	2	1	0	722	83.07	9.25	52.5	2
Q01469	Fatty acid-binding protein, epidermal OS=Homo sapiens GN=FABP5 PE=1 SV=3	6.66667	1	1	1	1	135	15.155	7.01	52.41	1
Q15361	Transcription termination factor 1 OS=Homo sapiens GN=TTF1 PE=1 SV=3	2.09945	1	1	1	1	905	102.987	9.38	52.34	1
Q96N38	Zinc finger protein 714 OS=Homo sapiens GN=ZNF714 PE=2 SV=3	6.85921	4	4	3	0	554	63.842	9.1	51.9067	4
Q99653	Calcineurin B homologous protein 1 OS=Homo sapiens GN=CHP1 PE=1 SV=3	6.15385	1	1	1	1	195	22.442	5.1	51.86	1
Q6VUC0	Transcription factor AP-2-epsilon OS=Homo sapiens GN=TFAP2E PE=2 SV=1	4.52489	1	1	1	1	442	46.183	8.37	51.8	1
P05549	Transcription factor AP-2-alpha OS=Homo sapiens GN=TFAP2A PE=1 SV=1	4.57666	1	1	1	1	437	48.032	8.02	51.8	1
Q92481	Transcription factor AP-2-beta OS=Homo sapiens GN=TFAP2B PE=1 SV=2	4.34783	1	1	1	1	460	50.442	8.24	51.8	1
Q9Y5S9	RNA-binding protein 8A OS=Homo sapiens GN=RBM8A PE=1 SV=1	10.9195	1	1	1	1	174	19.877	5.72	51.79	1
Q9BZE2	tRNA pseudouridine(38/39) synthase OS=Homo sapiens GN=PUS3 PE=1 SV=3	3.7422	2	2	2	1	481	55.612	7.49	51.7	2
O75494	Serine/arginine-rich splicing factor 10 OS=Homo sapiens GN=SRSF10 PE=1 SV=1	4.19847	1	1	1	1	262	31.282	11.27	51.68	1
Q9UK13	Zinc finger protein 221 OS=Homo sapiens GN=ZNF221 PE=2 SV=3	5.18639	3	3	0	1	617	71.124	8.43	51.5918	3
Q9NZL3	Zinc finger protein 224 OS=Homo sapiens GN=ZNF224 PE=1 SV=3	6.64781	4	4	1	1	707	82.226	8.69	51.5918	4
Q4VXU2	Polyadenylate-binding protein 1-like OS=Homo sapiens GN=PABPC1L PE=2 SV=1	3.25733	2	2	2	1	614	68.349	8.87	51.5886	2
Q8ND82	Zinc finger protein 280C OS=Homo sapiens GN=ZNF280C PE=1 SV=1	2.17096	1	1	1	1	737	83.042	9.11	51.48	1
Q5VTL8	Pre-mRNA-splicing factor 38B OS=Homo sapiens GN=PRPF38B PE=1 SV=1	1.8315	1	1	1	1	546	64.429	10.54	51.39	1
Q13127	RE1-silencing transcription factor OS=Homo sapiens GN=REST PE=1 SV=3	1.27621	1	1	1	1	1097	121.795	6.74	51.31	1
Q9HCM7	Fibrosin-1-like protein OS=Homo sapiens GN=FBRSL1 PE=1 SV=4	2.77512	2	2	2	1	1045	110.839	9.67	51.24	2
P49773	Histidine triad nucleotide-binding protein 1 OS=Homo sapiens GN=HINT1 PE=1 SV=2	19.0476	1	2	1	1	126	13.793	6.95	51.15	1
Q9H6Z4	Ran-binding protein 3 OS=Homo sapiens GN=RANBP3 PE=1 SV=1	2.1164	1	1	1	1	567	60.173	4.78	51.15	1
P84090	Enhancer of rudimentary homolog OS=Homo sapiens GN=ERH PE=1 SV=1	10.5769	1	1	1	1	104	12.251	5.92	50.97	1
O15371	Eukaryotic translation initiation factor 3 subunit D OS=Homo sapiens GN=EIF3D PE=1 SV=1	2.18978	1	1	1	1	548	63.932	6.05	50.96	1
P67936	Tropomyosin alpha-4 chain OS=Homo sapiens GN=TPM4 PE=1 SV=3	4.03226	1	1	1	1	248	28.504	4.69	50.87	1
P09493	Tropomyosin alpha-1 chain OS=Homo sapiens GN=TPM1 PE=1 SV=2	3.52113	1	1	1	1	284	32.689	4.74	50.87	1
P07951	Tropomyosin beta chain OS=Homo sapiens GN=TPM2 PE=1 SV=1	3.52113	1	1	1	1	284	32.831	4.7	50.87	1
Q9BS31	Zinc finger protein 649 OS=Homo sapiens GN=ZNF649 PE=1 SV=1	5.94059	2	2	2	1	505	57.646	8.76	50.75	2
Q6P2Q9	Pre-mRNA-processing-splicing factor 8 OS=Homo sapiens GN=PRPF8 PE=1 SV=2	2.35546	5	5	5	1	2335	273.427	8.84	50.75	5
Q9NV72	Zinc finger protein 701 OS=Homo sapiens GN=ZNF701 PE=2 SV=3	13.1827	5	5	3	1	531	60.864	9.28	50.19	5
A6NHQ2	rRNA/tRNA 2'-O-methyltransferase fibrillarin-like protein 1 OS=Homo sapiens GN=FBLL1 PE=3 SV=2	6.58683	2	2	2	1	334	34.782	10.35	50.18	2
P08729	Keratin, type II cytoskeletal 7 OS=Homo sapiens GN=KRT7 PE=1 SV=5	5.75693	3	3	0	0	469	51.354	5.48	49.94	3
P17017	Zinc finger protein 14 OS=Homo sapiens GN=ZNF14 PE=2 SV=3	4.36137	3	4	3	1	642	75.304	9.17	49.87	3
Q04725	Transducin-like enhancer protein 2 OS=Homo sapiens GN=TLE2 PE=1 SV=2	2.96097	2	2	2	1	743	79.791	6.62	49.77	2
Q04724	Transducin-like enhancer protein 1 OS=Homo sapiens GN=TLE1 PE=1 SV=2	2.85714	2	2	2	1	770	83.148	7.24	49.77	2
Q04726	Transducin-like enhancer protein 3 OS=Homo sapiens GN=TLE3 PE=1 SV=2	2.84974	2	2	2	1	772	83.364	7.2	49.77	2
Q04727	Transducin-like enhancer protein 4 OS=Homo sapiens GN=TLE4 PE=1 SV=3	2.84605	2	2	2	1	773	83.703	7.5	49.77	2
P58546	Myotrophin OS=Homo sapiens GN=MTPN PE=1 SV=2	14.4068	1	1	1	1	118	12.887	5.52	49.35	1
Q13838	Spliceosome RNA helicase DDX39B OS=Homo sapiens GN=DDX39B PE=1 SV=1	6.7757	2	2	2	1	428	48.96	5.67	49.28	2
Q93009	Ubiquitin carboxyl-terminal hydrolase 7 OS=Homo sapiens GN=USP7 PE=1 SV=2	1.08893	1	1	1	1	1102	128.22	5.55	49.12	1
Q8TA94	Zinc finger protein 563 OS=Homo sapiens GN=ZNF563 PE=2 SV=1	5.04202	2	2	1	1	476	55.398	9.14	48.5265	2
P62263	40S ribosomal protein S14 OS=Homo sapiens GN=RPS14 PE=1 SV=3	13.9073	2	3	2	1	151	16.263	10.05	48.38	2
Q9P2J8	Zinc finger protein 624 OS=Homo sapiens GN=ZNF624 PE=1 SV=3	2.54335	2	2	1	1	865	99.864	8.88	48.34	2
Q3ZCT1	Zinc finger protein 260 OS=Homo sapiens GN=ZNF260 PE=1 SV=3	9.46602	4	4	3	1	412	47.191	9.07	48.3165	4
P07910	Heterogeneous nuclear ribonucleoproteins C1/C2 OS=Homo sapiens GN=HNRNPC PE=1 SV=4	6.86275	2	2	2	1	306	33.65	5.08	48.14	2
P06733	Alpha-enolase OS=Homo sapiens GN=ENO1 PE=1 SV=2	3.22581	1	1	1	1	434	47.139	7.39	48.07	1
Q96N22	Zinc finger protein 681 OS=Homo sapiens GN=ZNF681 PE=2 SV=2	6.20155	3	3	1	0	645	75.011	9.09	47.87	3
P17038	Zinc finger protein 43 OS=Homo sapiens GN=ZNF43 PE=2 SV=4	6.42769	3	3	1	0	809	94.063	9.19	47.87	3
Q16600	Zinc finger protein 239 OS=Homo sapiens GN=ZNF239 PE=1 SV=3	5.02183	2	2	2	1	458	51.558	7.64	47.82	2
P46777	60S ribosomal protein L5 OS=Homo sapiens GN=RPL5 PE=1 SV=3	4.0404	1	1	1	1	297	34.341	9.72	47.61	1
Q7Z2W4	Zinc finger CCCH-type antiviral protein 1 OS=Homo sapiens GN=ZC3HAV1 PE=1 SV=3	1.44124	1	1	1	1	902	101.367	8.4	47.6	1
A2RRD8	Zinc finger protein 320 OS=Homo sapiens GN=ZNF320 PE=1 SV=1	7.46562	4	4	1	1	509	59.288	8.91	47.5867	4
O95780	Zinc finger protein 682 OS=Homo sapiens GN=ZNF682 PE=2 SV=1	3.01205	1	1	0	2	498	58.323	9	47.52	1
Q14694	Ubiquitin carboxyl-terminal hydrolase 10 OS=Homo sapiens GN=USP10 PE=1 SV=2	5.6391	3	3	3	1	798	87.08	5.31	47.52	3
Q9NYT6	Zinc finger protein 226 OS=Homo sapiens GN=ZNF226 PE=2 SV=2	2.98879	2	2	0	2	803	91.862	8.7	47.52	2
P07477	Trypsin-1 OS=Homo sapiens GN=PRSS1 PE=1 SV=1	4.04858	1	3	1	1	247	26.541	6.51	47.45	1
Q96MM3	Zinc finger protein 42 homolog OS=Homo sapiens GN=ZFP42 PE=1 SV=2	10	3	3	3	1	310	34.78	8.9	47.45	3
Q9NYF8	Bcl-2-associated transcription factor 1 OS=Homo sapiens GN=BCLAF1 PE=1 SV=2	4.45652	3	3	3	1	920	106.059	9.98	47.33	3
Q8TF32	Zinc finger protein 431 OS=Homo sapiens GN=ZNF431 PE=2 SV=2	9.375	5	5	3	1	576	67.173	8.76	47.2	5
Q6Y7W6	PERQ amino acid-rich with GYF domain-containing protein 2 OS=Homo sapiens GN=GIGYF2 PE=1 SV=1	1.07775	1	1	1	1	1299	149.978	5.54	47.18	1
Q8N972	Zinc finger protein 709 OS=Homo sapiens GN=ZNF709 PE=2 SV=1	6.55226	4	4	3	1	641	74.603	8.95	46.8847	4
P62851	40S ribosomal protein S25 OS=Homo sapiens GN=RPS25 PE=1 SV=1	7.2	1	1	1	1	125	13.734	10.11	46.79	1
Q9BQ52	Zinc phosphodiesterase ELAC protein 2 OS=Homo sapiens GN=ELAC2 PE=1 SV=2	2.30024	1	1	1	1	826	92.16	7.9	46.79	1
Q9P2F9	Zinc finger protein 319 OS=Homo sapiens GN=ZNF319 PE=1 SV=2	1.71821	1	1	1	1	582	65.504	8.37	46.74	1
Q9H0M5	Zinc finger protein 700 OS=Homo sapiens GN=ZNF700 PE=2 SV=1	3.36927	2	3	1	1	742	86.176	8.9	46.5865	2
P0DMR1	Heterogeneous nuclear ribonucleoprotein C-like 4 OS=Homo sapiens GN=HNRNPCL4 PE=3 SV=1	4.09556	1	1	1	1	293	32.01	5.68	46.58	1
B2RXH8	Heterogeneous nuclear ribonucleoprotein C-like 2 OS=Homo sapiens GN=HNRNPCL2 PE=2 SV=1	4.09556	1	1	1	1	293	32.053	5.44	46.58	1
O60812	Heterogeneous nuclear ribonucleoprotein C-like 1 OS=Homo sapiens GN=HNRNPCL1 PE=2 SV=1	4.09556	1	1	1	1	293	32.123	5.06	46.58	1
Q9NQH7	Probable Xaa-Pro aminopeptidase 3 OS=Homo sapiens GN=XPNPEP3 PE=1 SV=1	1.38067	1	1	1	1	507	56.997	6.83	46.58	1
Q9H8G1	Zinc finger protein 430 OS=Homo sapiens GN=ZNF430 PE=1 SV=3	6.84211	3	3	1	0	570	66.275	8.65	46.5	3
A6NN14	Zinc finger protein 729 OS=Homo sapiens GN=ZNF729 PE=2 SV=4	6.15016	3	3	0	0	1252	144.926	9.5	46.44	3
O43676	NADH dehydrogenase [ubiquinone] 1 beta subcomplex subunit 3 OS=Homo sapiens GN=NDUFB3 PE=1 SV=3	11.2245	1	1	1	1	98	11.395	9.2	46.4	1
P62304	Small nuclear ribonucleoprotein E OS=Homo sapiens GN=SNRPE PE=1 SV=1	11.9565	1	1	1	1	92	10.797	9.44	46.37	1
Q9NVU7	Protein SDA1 homolog OS=Homo sapiens GN=SDAD1 PE=1 SV=3	1.60116	1	1	1	1	687	79.82	9.25	46.37	1
P00390	Glutathione reductase, mitochondrial OS=Homo sapiens GN=GSR PE=1 SV=2	9.77011	4	4	4	1	522	56.221	8.5	46.35	4
Q7Z4H7	HAUS augmin-like complex subunit 6 OS=Homo sapiens GN=HAUS6 PE=1 SV=2	1.36126	1	1	1	1	955	108.553	6.47	46.22	1
P04632	Calpain small subunit 1 OS=Homo sapiens GN=CAPNS1 PE=1 SV=1	4.85075	1	1	1	1	268	28.298	5.2	46.08	1
Q9Y5Q3	Transcription factor MafB OS=Homo sapiens GN=MAFB PE=1 SV=2	3.71517	1	1	1	1	323	35.77	7.64	46.02	1
Q8NHW3	Transcription factor MafA OS=Homo sapiens GN=MAFA PE=1 SV=2	3.39943	1	1	1	1	353	36.959	7.83	46.02	1
Q70EK9	Ubiquitin carboxyl-terminal hydrolase 51 OS=Homo sapiens GN=USP51 PE=2 SV=1	2.391	1	1	1	1	711	79.705	8.37	45.96	1
Q12931	Heat shock protein 75 kDa, mitochondrial OS=Homo sapiens GN=TRAP1 PE=1 SV=3	1.98864	1	1	0	2	704	80.06	8.21	45.73	1
P22735	Protein-glutamine gamma-glutamyltransferase K OS=Homo sapiens GN=TGM1 PE=1 SV=4	1.46879	1	1	1	1	817	89.73	6.04	45.61	1
P39019	40S ribosomal protein S19 OS=Homo sapiens GN=RPS19 PE=1 SV=2	17.2414	3	3	3	1	145	16.051	10.32	45.4872	3
Q02539	Histone H1.1 OS=Homo sapiens GN=HIST1H1A PE=1 SV=3	5.11628	1	1	1	1	215	21.829	10.99	45.39	1
P22492	Histone H1t OS=Homo sapiens GN=HIST1H1T PE=2 SV=4	5.31401	1	1	1	1	207	22.006	11.71	45.39	1
P62081	40S ribosomal protein S7 OS=Homo sapiens GN=RPS7 PE=1 SV=1	6.18557	1	1	1	1	194	22.113	10.1	45.32	1
O95801	Tetratricopeptide repeat protein 4 OS=Homo sapiens GN=TTC4 PE=1 SV=3	5.68475	2	2	2	1	387	44.65	5.6	45.24	2
Q9Y4F3	Meiosis arrest female protein 1 OS=Homo sapiens GN=KIAA0430 PE=1 SV=6	1.37773	3	3	3	1	1742	192.737	7.87	45.2305	3
Q99614	Tetratricopeptide repeat protein 1 OS=Homo sapiens GN=TTC1 PE=1 SV=1	4.10959	1	1	1	1	292	33.505	4.84	45.21	1
Q96SB4	SRSF protein kinase 1 OS=Homo sapiens GN=SRPK1 PE=1 SV=2	2.90076	2	2	2	1	655	74.278	6.16	45.07	2
Q6ZN57	Zinc finger protein 2 homolog OS=Homo sapiens GN=ZFP2 PE=1 SV=1	2.81996	1	1	1	1	461	52.706	8.56	44.96	1
Q6ZNA4	E3 ubiquitin-protein ligase Arkadia OS=Homo sapiens GN=RNF111 PE=1 SV=3	0.905433	1	1	1	1	994	108.794	7.15	44.83	1
Q16763	Ubiquitin-conjugating enzyme E2 S OS=Homo sapiens GN=UBE2S PE=1 SV=2	10.8108	2	2	2	1	222	23.831	8.38	44.8	2
Q96PQ6	Zinc finger protein 317 OS=Homo sapiens GN=ZNF317 PE=1 SV=2	10.2521	6	6	5	1	595	67.915	8.98	44.79	6
Q5JQF8	Polyadenylate-binding protein 1-like 2 OS=Homo sapiens GN=PABPC1L2A PE=2 SV=1	5.5	1	1	1	1	200	22.785	9.1	44.56	1
Q01105	Protein SET OS=Homo sapiens GN=SET PE=1 SV=3	3.44828	1	1	1	1	290	33.469	4.32	44.55	1
P0DME0	Protein SETSIP OS=Homo sapiens GN=SETSIP PE=1 SV=1	3.31126	1	1	1	1	302	34.861	4.31	44.55	1
O60884	DnaJ homolog subfamily A member 2 OS=Homo sapiens GN=DNAJA2 PE=1 SV=1	8.25243	3	3	3	1	412	45.717	6.48	44.5	3
P14618	Pyruvate kinase PKM OS=Homo sapiens GN=PKM PE=1 SV=4	4.14313	2	2	2	1	531	57.9	7.84	43.57	2
P62424	60S ribosomal protein L7a OS=Homo sapiens GN=RPL7A PE=1 SV=2	3.00752	1	1	1	1	266	29.977	10.61	43.26	1
P78371	T-complex protein 1 subunit beta OS=Homo sapiens GN=CCT2 PE=1 SV=4	5.98131	2	2	2	1	535	57.452	6.46	43.17	2
P0CB38	Polyadenylate-binding protein 4-like OS=Homo sapiens GN=PABPC4L PE=2 SV=1	3.24324	2	3	2	1	370	41.827	9.5	43.1533	2
Q6AW86	Zinc finger protein 324B OS=Homo sapiens GN=ZNF324B PE=1 SV=1	4.04412	1	1	1	1	544	60.563	9.69	42.94	1
O75467	Zinc finger protein 324A OS=Homo sapiens GN=ZNF324 PE=2 SV=1	3.9783	1	1	1	1	553	61.066	9.57	42.94	1
Q13586	Stromal interaction molecule 1 OS=Homo sapiens GN=STIM1 PE=1 SV=3	3.50365	2	2	2	1	685	77.375	6.67	42.82	2
O15226	NF-kappa-B-repressing factor OS=Homo sapiens GN=NKRF PE=1 SV=2	4.78261	3	3	3	1	690	77.624	8.79	42.726	3
Q9ULV3	Cip1-interacting zinc finger protein OS=Homo sapiens GN=CIZ1 PE=1 SV=2	4.23163	3	3	3	1	898	99.983	6.11	42.5333	3
Q9C0A0	Contactin-associated protein-like 4 OS=Homo sapiens GN=CNTNAP4 PE=1 SV=3	0.535168	1	1	1	1	1308	145.182	6.68	42.39	1
O43402	ER membrane protein complex subunit 8 OS=Homo sapiens GN=EMC8 PE=1 SV=1	9.04762	2	2	2	1	210	23.758	6.4	42.32	2
P14136	Glial fibrillary acidic protein OS=Homo sapiens GN=GFAP PE=1 SV=1	4.16667	2	2	0	0	432	49.85	5.52	42.28	2
P06702	Protein S100-A9 OS=Homo sapiens GN=S100A9 PE=1 SV=1	24.5614	2	3	2	1	114	13.234	6.13	42.09	2
Q8TF50	Zinc finger protein 526 OS=Homo sapiens GN=ZNF526 PE=2 SV=2	1.79104	1	1	1	1	670	73.574	6.47	42.01	1
P29508	Serpin B3 OS=Homo sapiens GN=SERPINB3 PE=1 SV=2	4.87179	2	2	2	1	390	44.537	6.81	41.79	2
P48594	Serpin B4 OS=Homo sapiens GN=SERPINB4 PE=1 SV=2	4.87179	2	2	2	1	390	44.825	6.21	41.79	2
Q14690	Protein RRP5 homolog OS=Homo sapiens GN=PDCD11 PE=1 SV=3	0.587921	1	1	1	1	1871	208.57	8.87	41.63	1
O00470	Homeobox protein Meis1 OS=Homo sapiens GN=MEIS1 PE=1 SV=1	8.97436	3	3	3	1	390	42.989	6.33	41.31	3
Q9UL18	Protein argonaute-1 OS=Homo sapiens GN=AGO1 PE=1 SV=3	1.51692	1	1	1	1	857	97.152	9.16	41.19	1
Q9H9G7	Protein argonaute-3 OS=Homo sapiens GN=AGO3 PE=1 SV=2	1.51163	1	1	1	1	860	97.298	9.11	41.19	1
Q08188	Protein-glutamine gamma-glutamyltransferase E OS=Homo sapiens GN=TGM3 PE=1 SV=4	2.5974	1	1	1	1	693	76.584	5.86	41.15	1
Q7Z7A3	Cytoplasmic tRNA 2-thiolation protein 1 OS=Homo sapiens GN=CTU1 PE=1 SV=1	10.3448	2	2	2	1	348	36.427	9.2	41.14	2
Q9UBQ0	Vacuolar protein sorting-associated protein 29 OS=Homo sapiens GN=VPS29 PE=1 SV=1	12.6374	2	2	2	1	182	20.493	6.79	40.73	2
Q9H3K6	BolA-like protein 2 OS=Homo sapiens GN=BOLA2 PE=1 SV=1	29.0698	2	2	2	1	86	10.11	6.52	40.7	2
P50991	T-complex protein 1 subunit delta OS=Homo sapiens GN=CCT4 PE=1 SV=4	6.49351	3	4	3	1	539	57.888	7.83	40.7	3
Q9NQ55	Suppressor of SWI4 1 homolog OS=Homo sapiens GN=PPAN PE=2 SV=1	3.59408	1	1	1	1	473	53.161	10.13	40.69	1
O43172	U4/U6 small nuclear ribonucleoprotein Prp4 OS=Homo sapiens GN=PRPF4 PE=1 SV=2	3.06513	1	1	1	1	522	58.412	7.42	40.58	1
Q9Y2J4	Angiomotin-like protein 2 OS=Homo sapiens GN=AMOTL2 PE=1 SV=3	0.898588	1	1	1	1	779	85.713	7.3	40.58	1
Q16630	Cleavage and polyadenylation specificity factor subunit 6 OS=Homo sapiens GN=CPSF6 PE=1 SV=2	2.35935	1	1	1	1	551	59.173	7.15	40.48	1
Q99626	Homeobox protein CDX-2 OS=Homo sapiens GN=CDX2 PE=2 SV=3	13.099	2	2	2	1	313	33.499	9.63	40.47	2
Q99456	Keratin, type I cytoskeletal 12 OS=Homo sapiens GN=KRT12 PE=1 SV=1	1.82186	2	3	0	4	494	53.478	4.78	40.47	2
Q8N8H1	Putative protein ZNF321 OS=Homo sapiens GN=ZNF321P PE=5 SV=3	12.1951	1	1	1	1	164	18.952	7.01	40.41	1
O14602	Eukaryotic translation initiation factor 1A, Y-chromosomal OS=Homo sapiens GN=EIF1AY PE=1 SV=4	7.63889	1	1	1	1	144	16.432	5.24	40.18	1
P47813	Eukaryotic translation initiation factor 1A, X-chromosomal OS=Homo sapiens GN=EIF1AX PE=1 SV=2	7.63889	1	1	1	1	144	16.45	5.24	40.18	1
O15391	Transcription factor YY2 OS=Homo sapiens GN=YY2 PE=2 SV=1	6.45161	2	2	2	1	372	41.321	6.18	39.92	2
O00567	Nucleolar protein 56 OS=Homo sapiens GN=NOP56 PE=1 SV=4	2.18855	1	1	1	1	594	66.009	9.19	39.78	1
Q68DI1	Zinc finger protein 776 OS=Homo sapiens GN=ZNF776 PE=1 SV=2	4.2471	2	2	2	1	518	59.575	8.32	39.6891	2
P61289	Proteasome activator complex subunit 3 OS=Homo sapiens GN=PSME3 PE=1 SV=1	3.54331	1	1	1	1	254	29.488	5.95	39.5	1
Q9NW64	Pre-mRNA-splicing factor RBM22 OS=Homo sapiens GN=RBM22 PE=1 SV=1	9.52381	3	3	3	1	420	46.865	8.54	39.24	3
Q9HB71	Calcyclin-binding protein OS=Homo sapiens GN=CACYBP PE=1 SV=2	11.4035	3	3	3	1	228	26.194	8.25	39.16	3
Q04637	Eukaryotic translation initiation factor 4 gamma 1 OS=Homo sapiens GN=EIF4G1 PE=1 SV=4	0.437774	1	1	1	1	1599	175.382	5.33	39.1	1
A6NFI3	Zinc finger protein 316 OS=Homo sapiens GN=ZNF316 PE=1 SV=1	3.88446	2	2	2	1	1004	108.37	5.31	38.98	2
P45974	Ubiquitin carboxyl-terminal hydrolase 5 OS=Homo sapiens GN=USP5 PE=1 SV=2	1.74825	1	1	1	1	858	95.725	5.03	38.74	1
P17014	Zinc finger protein 12 OS=Homo sapiens GN=ZNF12 PE=1 SV=3	3.44333	2	3	1	1	697	81.149	7.84	38.7206	2
Q14587	Zinc finger protein 268 OS=Homo sapiens GN=ZNF268 PE=1 SV=2	1.58395	1	2	0	2	947	108.303	8.87	38.7206	1
O14556	Glyceraldehyde-3-phosphate dehydrogenase, testis-specific OS=Homo sapiens GN=GAPDHS PE=1 SV=2	1.71569	1	1	1	1	408	44.473	8.19	38.49	1
Q70Z53	Protein FRA10AC1 OS=Homo sapiens GN=FRA10AC1 PE=1 SV=3	4.44444	1	1	1	1	315	37.525	8.1	38.48	1
Q9UHB7	AF4/FMR2 family member 4 OS=Homo sapiens GN=AFF4 PE=1 SV=1	0.687876	1	1	1	1	1163	127.382	9.31	38.39	1
P46778	60S ribosomal protein L21 OS=Homo sapiens GN=RPL21 PE=1 SV=2	18.125	2	3	2	1	160	18.553	10.49	38.25	2
Q9UHR4	Brain-specific angiogenesis inhibitor 1-associated protein 2-like protein 1 OS=Homo sapiens GN=BAIAP2L1 PE=1 SV=2	2.93542	1	1	1	1	511	56.847	8.68	38.19	1
Q6ZVX7	F-box only protein 50 OS=Homo sapiens GN=NCCRP1 PE=1 SV=1	7.63636	2	2	2	1	275	30.828	6.62	37.87	2
P25398	40S ribosomal protein S12 OS=Homo sapiens GN=RPS12 PE=1 SV=3	7.57576	1	1	1	1	132	14.505	7.21	37.75	1
P23588	Eukaryotic translation initiation factor 4B OS=Homo sapiens GN=EIF4B PE=1 SV=2	5.89198	3	3	3	1	611	69.11	5.73	37.71	3
Q71RC2	La-related protein 4 OS=Homo sapiens GN=LARP4 PE=1 SV=3	3.03867	1	1	1	1	724	80.546	6.61	37.7	1
Q9H707	Zinc finger protein 552 OS=Homo sapiens GN=ZNF552 PE=1 SV=2	15.7248	4	4	4	1	407	46.168	8.51	37.65	4
Q3KP31	Zinc finger protein 791 OS=Homo sapiens GN=ZNF791 PE=2 SV=1	4.86111	3	3	2	1	576	66.828	9.22	37.6465	3
P22061	Protein-L-isoaspartate(D-aspartate) O-methyltransferase OS=Homo sapiens GN=PCMT1 PE=1 SV=4	6.1674	1	1	1	1	227	24.621	7.21	37.55	1
O43900	Prickle-like protein 3 OS=Homo sapiens GN=PRICKLE3 PE=1 SV=2	2.76423	1	1	1	1	615	68.565	7.88	37.55	1
Q96B54	Zinc finger protein 428 OS=Homo sapiens GN=ZNF428 PE=1 SV=2	5.85106	1	1	1	1	188	20.468	4.17	37.3	1
Q9P246	Stromal interaction molecule 2 OS=Homo sapiens GN=STIM2 PE=1 SV=2	1.47453	1	1	1	1	746	83.918	6.76	37.09	1
Q9Y2W1	Thyroid hormone receptor-associated protein 3 OS=Homo sapiens GN=THRAP3 PE=1 SV=2	7.74869	5	5	5	1	955	108.601	10.15	36.89	5
Q9UNY5	Zinc finger protein 232 OS=Homo sapiens GN=ZNF232 PE=1 SV=1	5.27578	2	2	1	0	417	47.658	6.74	36.7767	2
O75534	Cold shock domain-containing protein E1 OS=Homo sapiens GN=CSDE1 PE=1 SV=2	2.25564	2	2	2	1	798	88.829	6.25	36.74	2
Q9BXF6	Rab11 family-interacting protein 5 OS=Homo sapiens GN=RAB11FIP5 PE=1 SV=1	5.0536	2	2	2	1	653	70.372	9.23	36.73	2
Q9UN86	Ras GTPase-activating protein-binding protein 2 OS=Homo sapiens GN=G3BP2 PE=1 SV=2	2.6971	1	1	1	1	482	54.088	5.55	36.72	1
P46087	Probable 28S rRNA (cytosine(4447)-C(5))-methyltransferase OS=Homo sapiens GN=NOP2 PE=1 SV=2	2.83251	2	2	2	1	812	89.247	9.23	36.62	2
Q53GI3	Zinc finger protein 394 OS=Homo sapiens GN=ZNF394 PE=1 SV=2	11.4082	5	5	5	1	561	64.216	7.9	36.61	5
Q9NQ29	Putative RNA-binding protein Luc7-like 1 OS=Homo sapiens GN=LUC7L PE=1 SV=1	5.66038	2	2	1	0	371	43.701	9.92	36.54	2
Q9HC44	Vasculin-like protein 1 OS=Homo sapiens GN=GPBP1L1 PE=1 SV=1	6.11814	2	3	2	1	474	52.269	6.84	36.51	2
Q86TJ2	Transcriptional adapter 2-beta OS=Homo sapiens GN=TADA2B PE=1 SV=2	1.66667	1	1	1	1	420	48.44	7.83	36.34	1
Q14103	Heterogeneous nuclear ribonucleoprotein D0 OS=Homo sapiens GN=HNRNPD PE=1 SV=1	3.94366	1	1	1	1	355	38.41	7.81	36.18	1
Q96HC4	PDZ and LIM domain protein 5 OS=Homo sapiens GN=PDLIM5 PE=1 SV=5	1.51007	1	1	1	1	596	63.904	8.21	36.1	1
Q96QV6	Histone H2A type 1-A OS=Homo sapiens GN=HIST1H2AA PE=1 SV=3	5.34351	1	1	0	2	131	14.225	10.86	36.09	1
P16104	Histone H2AX OS=Homo sapiens GN=H2AFX PE=1 SV=2	4.8951	1	1	0	2	143	15.135	10.74	36.09	1
Q5HY98	Zinc finger protein 766 OS=Homo sapiens GN=ZNF766 PE=2 SV=1	6.62393	3	3	2	1	468	54.472	9.45	35.91	3
Q86V81	THO complex subunit 4 OS=Homo sapiens GN=ALYREF PE=1 SV=3	3.89105	1	1	1	1	257	26.872	11.15	35.89	1
P20930	Filaggrin OS=Homo sapiens GN=FLG PE=1 SV=3	1.18197	1	1	1	1	4061	434.922	9.25	35.88	1
Q99967	Cbp/p300-interacting transactivator 2 OS=Homo sapiens GN=CITED2 PE=1 SV=2	13.7037	2	2	2	1	270	28.478	6.95	35.8	2
Q13485	Mothers against decapentaplegic homolog 4 OS=Homo sapiens GN=SMAD4 PE=1 SV=1	2.89855	2	2	2	1	552	60.401	6.99	35.8	2
Q9Y2L8	Zinc finger protein with KRAB and SCAN domains 5 OS=Homo sapiens GN=ZKSCAN5 PE=1 SV=1	4.05244	3	3	1	1	839	96.842	7.56	35.8	3
Q6R2W3	SCAN domain-containing protein 3 OS=Homo sapiens GN=ZBED9 PE=2 SV=1	0.528302	1	1	0	2	1325	151.57	6.73	35.8	1
Q9BXP5	Serrate RNA effector molecule homolog OS=Homo sapiens GN=SRRT PE=1 SV=1	2.16895	1	1	1	1	876	100.604	5.96	35.79	1
Q12952	Forkhead box protein L1 OS=Homo sapiens GN=FOXL1 PE=2 SV=2	2.31884	1	1	1	1	345	36.468	9.63	35.74	1
Q99958	Forkhead box protein C2 OS=Homo sapiens GN=FOXC2 PE=1 SV=1	1.59681	1	1	1	1	501	53.685	8.5	35.74	1
Q12948	Forkhead box protein C1 OS=Homo sapiens GN=FOXC1 PE=1 SV=3	1.44665	1	1	1	1	553	56.753	8.51	35.74	1
Q13547	Histone deacetylase 1 OS=Homo sapiens GN=HDAC1 PE=1 SV=1	4.35685	2	2	2	1	482	55.068	5.48	35.72	2
Q9H814	Phosphorylated adapter RNA export protein OS=Homo sapiens GN=PHAX PE=1 SV=1	2.03046	1	1	1	1	394	44.375	5.4	35.56	1
Q14315	Filamin-C OS=Homo sapiens GN=FLNC PE=1 SV=3	0.40367	1	1	0	2	2725	290.841	5.97	35.39	1
P07737	Profilin-1 OS=Homo sapiens GN=PFN1 PE=1 SV=2	5.71429	1	1	1	1	140	15.045	8.27	35.35	1
P61981	14-3-3 protein gamma OS=Homo sapiens GN=YWHAG PE=1 SV=2	6.88259	2	2	1	1	247	28.285	4.89	35	2
Q9HCJ3	Ribonucleoprotein PTB-binding 2 OS=Homo sapiens GN=RAVER2 PE=1 SV=2	7.38061	2	2	2	1	691	74.292	7.47	34.92	2
P13796	Plastin-2 OS=Homo sapiens GN=LCP1 PE=1 SV=6	2.07337	1	1	1	1	627	70.244	5.43	34.83	1
Q14684	Ribosomal RNA processing protein 1 homolog B OS=Homo sapiens GN=RRP1B PE=1 SV=3	5.40897	2	3	2	1	758	84.375	9.76	34.81	2
Q07666	KH domain-containing, RNA-binding, signal transduction-associated protein 1 OS=Homo sapiens GN=KHDRBS1 PE=1 SV=1	6.54628	2	2	2	1	443	48.197	8.66	34.57	2
O76021	Ribosomal L1 domain-containing protein 1 OS=Homo sapiens GN=RSL1D1 PE=1 SV=3	4.28571	2	2	2	1	490	54.939	10.13	34.5585	2
Q7L2E3	Putative ATP-dependent RNA helicase DHX30 OS=Homo sapiens GN=DHX30 PE=1 SV=1	0.670017	1	1	1	1	1194	133.855	8.78	34.44	1
Q96CS4	Zinc finger protein 689 OS=Homo sapiens GN=ZNF689 PE=2 SV=1	12	4	5	4	1	500	56.87	9.8	34.42	4
Q96SK3	Zinc finger protein 607 OS=Homo sapiens GN=ZNF607 PE=1 SV=3	3.44828	2	2	1	1	696	80.454	8.6	34.3465	2
Q13325	Interferon-induced protein with tetratricopeptide repeats 5 OS=Homo sapiens GN=IFIT5 PE=1 SV=1	2.48963	1	2	1	1	482	55.812	7.4	34.31	1
Q9NWS9	Zinc finger protein 446 OS=Homo sapiens GN=ZNF446 PE=1 SV=1	9.77778	2	2	2	1	450	48.926	6.09	34.29	2
Q7KZF4	Staphylococcal nuclease domain-containing protein 1 OS=Homo sapiens GN=SND1 PE=1 SV=1	0.989011	1	1	1	1	910	101.934	7.17	34.26	1
P18124	60S ribosomal protein L7 OS=Homo sapiens GN=RPL7 PE=1 SV=1	14.9194	3	4	3	1	248	29.207	10.65	34.13	3
P30613	Pyruvate kinase PKLR OS=Homo sapiens GN=PKLR PE=1 SV=2	1.91638	1	1	1	1	574	61.791	7.74	34.12	1
P13010	X-ray repair cross-complementing protein 5 OS=Homo sapiens GN=XRCC5 PE=1 SV=3	5.7377	3	3	3	1	732	82.652	5.81	33.98	3
Q8TBZ5	Zinc finger protein 502 OS=Homo sapiens GN=ZNF502 PE=1 SV=1	4.41176	2	2	2	1	544	62.879	8.69	33.62	2
Q12926	ELAV-like protein 2 OS=Homo sapiens GN=ELAVL2 PE=1 SV=2	2.50696	1	1	1	1	359	39.479	9.13	33.61	1
P26378	ELAV-like protein 4 OS=Homo sapiens GN=ELAVL4 PE=1 SV=2	2.36842	1	1	1	1	380	41.743	9.39	33.61	1
Q14004	Cyclin-dependent kinase 13 OS=Homo sapiens GN=CDK13 PE=1 SV=2	2.24868	3	3	3	1	1512	164.823	9.69	33.59	3
Q9BZI7	Regulator of nonsense transcripts 3B OS=Homo sapiens GN=UPF3B PE=1 SV=1	4.55487	2	2	2	1	483	57.727	9.48	33.34	2
P43487	Ran-specific GTPase-activating protein OS=Homo sapiens GN=RANBP1 PE=1 SV=1	5.47264	1	1	1	1	201	23.296	5.29	33.33	1
P47756	F-actin-capping protein subunit beta OS=Homo sapiens GN=CAPZB PE=1 SV=4	3.61011	1	1	1	1	277	31.331	5.59	32.91	1
Q9H8H2	Probable ATP-dependent RNA helicase DDX31 OS=Homo sapiens GN=DDX31 PE=1 SV=2	3.9953	3	3	3	1	851	94.029	9.99	32.8	3
Q96C28	Zinc finger protein 707 OS=Homo sapiens GN=ZNF707 PE=1 SV=2	2.69542	1	1	1	1	371	43.06	9.61	32.76	1
Q9ULD4	Bromodomain and PHD finger-containing protein 3 OS=Homo sapiens GN=BRPF3 PE=1 SV=2	0.580913	1	1	1	1	1205	135.66	6.58	32.59	1
P04637	Cellular tumor antigen p53 OS=Homo sapiens GN=TP53 PE=1 SV=4	1.78117	1	1	1	1	393	43.625	6.79	32.56	1
Q16186	Proteasomal ubiquitin receptor ADRM1 OS=Homo sapiens GN=ADRM1 PE=1 SV=2	6.14251	2	2	2	1	407	42.127	5.07	32.54	2
Q9ULF5	Zinc transporter ZIP10 OS=Homo sapiens GN=SLC39A10 PE=1 SV=2	0.962696	1	1	1	1	831	94.073	6.76	32.46	1
P62841	40S ribosomal protein S15 OS=Homo sapiens GN=RPS15 PE=1 SV=2	26.8966	2	4	2	1	145	17.029	10.39	32.41	2
O94992	Protein HEXIM1 OS=Homo sapiens GN=HEXIM1 PE=1 SV=1	6.96379	1	2	1	1	359	40.598	4.89	32.41	1
P54727	UV excision repair protein RAD23 homolog B OS=Homo sapiens GN=RAD23B PE=1 SV=1	2.68949	1	1	1	1	409	43.145	4.84	32.11	1
Q14525	Keratin, type I cuticular Ha3-II OS=Homo sapiens GN=KRT33B PE=1 SV=3	1.73267	1	1	0	4	404	46.185	4.84	32.1	1
Q15323	Keratin, type I cuticular Ha1 OS=Homo sapiens GN=KRT31 PE=1 SV=3	1.68269	1	1	0	4	416	47.207	4.88	32.1	1
P05783	Keratin, type I cytoskeletal 18 OS=Homo sapiens GN=KRT18 PE=1 SV=2	1.62791	1	1	0	4	430	48.029	5.45	32.1	1
O76014	Keratin, type I cuticular Ha7 OS=Homo sapiens GN=KRT37 PE=3 SV=3	1.55902	1	1	0	4	449	49.715	4.96	32.1	1
Q14532	Keratin, type I cuticular Ha2 OS=Homo sapiens GN=KRT32 PE=2 SV=3	1.5625	1	1	0	4	448	50.31	4.84	32.1	1
Q92764	Keratin, type I cuticular Ha5 OS=Homo sapiens GN=KRT35 PE=2 SV=5	1.53846	1	1	0	4	455	50.329	4.91	32.1	1
O76015	Keratin, type I cuticular Ha8 OS=Homo sapiens GN=KRT38 PE=1 SV=3	1.53509	1	1	0	4	456	50.447	4.84	32.1	1
O76013	Keratin, type I cuticular Ha6 OS=Homo sapiens GN=KRT36 PE=2 SV=1	1.49893	1	1	0	4	467	52.214	4.94	32.1	1
Q13162	Peroxiredoxin-4 OS=Homo sapiens GN=PRDX4 PE=1 SV=1	2.58303	1	1	1	1	271	30.521	6.29	32	1
Q7L2R6	Zinc finger protein 765 OS=Homo sapiens GN=ZNF765 PE=1 SV=2	5.92734	3	3	1	1	523	61.594	8.6	31.9967	3
Q86XN6	Zinc finger protein 761 OS=Homo sapiens GN=ZNF761 PE=2 SV=2	4.1555	3	3	1	1	746	87.662	9	31.9967	3
Q9BV38	WD repeat-containing protein 18 OS=Homo sapiens GN=WDR18 PE=1 SV=2	6.01852	2	3	2	1	432	47.375	6.7	31.98	2
P27824	Calnexin OS=Homo sapiens GN=CANX PE=1 SV=2	2.02703	1	1	1	1	592	67.526	4.6	31.76	1
Q9NTW7	Zinc finger protein 64 homolog, isoforms 3 and 4 OS=Homo sapiens GN=ZFP64 PE=1 SV=3	1.70543	1	1	1	1	645	72.17	8.43	31.54	1
Q8N9F8	Zinc finger protein 454 OS=Homo sapiens GN=ZNF454 PE=2 SV=2	6.70498	3	3	1	0	522	59.969	8.65	31.2365	3
P61353	60S ribosomal protein L27 OS=Homo sapiens GN=RPL27 PE=1 SV=2	12.5	2	2	2	1	136	15.788	10.56	31.22	2
Q6NWY9	Pre-mRNA-processing factor 40 homolog B OS=Homo sapiens GN=PRPF40B PE=1 SV=1	0.803674	1	1	1	1	871	99.296	6.83	31.18	1
Q08ER8	Zinc finger protein 543 OS=Homo sapiens GN=ZNF543 PE=1 SV=3	3	1	1	1	1	600	68.359	7.9	31.1	1
O43296	Zinc finger protein 264 OS=Homo sapiens GN=ZNF264 PE=1 SV=1	2.87081	1	1	1	1	627	70.541	7.49	31.1	1
Q9BQ04	RNA-binding protein 4B OS=Homo sapiens GN=RBM4B PE=1 SV=1	3.34262	1	1	1	1	359	40.124	6.74	31.07	1
Q9BWF3	RNA-binding protein 4 OS=Homo sapiens GN=RBM4 PE=1 SV=1	3.2967	1	1	1	1	364	40.289	7.08	31.07	1
P49736	DNA replication licensing factor MCM2 OS=Homo sapiens GN=MCM2 PE=1 SV=4	3.20796	2	2	2	1	904	101.832	5.52	31.06	2
P17041	Zinc finger protein 32 OS=Homo sapiens GN=ZNF32 PE=1 SV=2	4.0293	1	1	0	3	273	31.009	9.35	31	1
Q96LW9	Zinc finger and SCAN domain-containing protein 31 OS=Homo sapiens GN=ZSCAN31 PE=1 SV=2	2.70936	1	1	0	11	406	47.263	6.89	31	1
Q6ZNG0	Zinc finger protein 620 OS=Homo sapiens GN=ZNF620 PE=2 SV=1	2.60664	1	1	0	11	422	48.472	8.29	31	1
Q6ZSS3	Zinc finger protein 621 OS=Homo sapiens GN=ZNF621 PE=2 SV=1	5.01139	2	2	0	2	439	49.173	8.94	31	2
Q969W8	Zinc finger protein 566 OS=Homo sapiens GN=ZNF566 PE=2 SV=1	13.1579	1	1	0	11	418	49.188	8.06	31	1
Q3KNS6	Zinc finger protein 829 OS=Homo sapiens GN=ZNF829 PE=2 SV=1	7.63889	1	1	0	11	432	50.109	7.93	31	1
Q8N8L2	Zinc finger protein 491 OS=Homo sapiens GN=ZNF491 PE=2 SV=1	2.51716	1	1	0	3	437	50.916	9.28	31	1
Q96BR6	Zinc finger protein 669 OS=Homo sapiens GN=ZNF669 PE=2 SV=2	2.37069	1	1	0	11	464	52.563	8.72	31	1
Q9NQX6	Zinc finger protein 331 OS=Homo sapiens GN=ZNF331 PE=1 SV=1	7.12743	1	1	0	11	463	53.704	8.91	31	1
Q8NA42	Zinc finger protein 383 OS=Homo sapiens GN=ZNF383 PE=2 SV=1	6.94737	1	1	0	11	475	54.577	7.9	31	1
Q8N587	Zinc finger protein 561 OS=Homo sapiens GN=ZNF561 PE=2 SV=2	2.26337	1	1	0	11	486	55.161	8.82	31	1
Q14585	Zinc finger protein 345 OS=Homo sapiens GN=ZNF345 PE=2 SV=1	16.5984	2	2	0	1	488	55.347	8.34	31	2
Q8NDP4	Zinc finger protein 439 OS=Homo sapiens GN=ZNF439 PE=1 SV=1	2.20441	1	1	0	11	499	58.357	9.25	31	1
Q96NG8	Zinc finger protein 582 OS=Homo sapiens GN=ZNF582 PE=2 SV=1	6.38298	2	2	0	2	517	60.459	8.47	31	2
Q147U1	Zinc finger protein 846 OS=Homo sapiens GN=ZNF846 PE=1 SV=2	4.12758	1	1	0	11	533	60.513	9	31	1
Q9ULM2	Zinc finger protein 490 OS=Homo sapiens GN=ZNF490 PE=1 SV=2	2.0794	1	1	0	11	529	61.3	8.7	31	1
Q9UJL9	Zinc finger protein ZFP69B OS=Homo sapiens GN=ZFP69B PE=1 SV=2	2.05993	1	1	0	11	534	61.442	9.01	31	1
C9JN71	Zinc finger protein 878 OS=Homo sapiens GN=ZNF878 PE=3 SV=2	2.07156	1	1	0	11	531	61.5	9.45	31	1
Q96NI8	Zinc finger protein 570 OS=Homo sapiens GN=ZNF570 PE=2 SV=1	2.05224	1	1	0	11	536	62.29	8.28	31	1
Q8N9K5	Zinc finger protein 565 OS=Homo sapiens GN=ZNF565 PE=2 SV=2	2.04082	1	1	0	11	539	62.405	8.21	31	1
Q8N141	Zinc finger protein 82 homolog OS=Homo sapiens GN=ZFP82 PE=2 SV=1	8.27068	1	2	0	11	532	62.537	8.98	31	1
Q9BUY5	Zinc finger protein 426 OS=Homo sapiens GN=ZNF426 PE=1 SV=1	1.98556	1	1	0	11	554	63.065	7.74	31	1
Q8N2I2	Zinc finger protein 619 OS=Homo sapiens GN=ZNF619 PE=2 SV=1	3.57143	2	2	0	0	560	63.281	8.35	31	2
Q9HCL3	Zinc finger protein 14 homolog OS=Homo sapiens GN=ZFP14 PE=2 SV=2	12.3827	1	2	0	11	533	63.422	8.62	31	1
Q494X3	Zinc finger protein 404 OS=Homo sapiens GN=ZNF404 PE=1 SV=2	1.99275	1	1	0	11	552	65.382	9.14	31	1
Q9UC07	Zinc finger protein 69 OS=Homo sapiens GN=ZNF69 PE=1 SV=2	3.88693	1	1	0	11	566	65.718	8.85	31	1
Q6P280	Zinc finger protein 529 OS=Homo sapiens GN=ZNF529 PE=2 SV=2	1.95382	1	1	0	11	563	65.822	8.21	31	1
Q96ND8	Zinc finger protein 583 OS=Homo sapiens GN=ZNF583 PE=2 SV=2	1.93322	1	1	0	11	569	65.99	8.82	31	1
Q8TAF7	Zinc finger protein 461 OS=Homo sapiens GN=ZNF461 PE=2 SV=2	11.0124	2	3	0	1	563	66.171	8.25	31	2
Q6PDB4	Zinc finger protein 880 OS=Homo sapiens GN=ZNF880 PE=2 SV=2	1.90641	1	1	0	11	577	66.719	9.29	31	1
Q7Z3V5	Zinc finger protein 571 OS=Homo sapiens GN=ZNF571 PE=2 SV=3	1.80624	1	1	0	11	609	70.746	8.35	31	1
Q9H7R0	Zinc finger protein 442 OS=Homo sapiens GN=ZNF442 PE=2 SV=1	1.75439	1	1	0	11	627	72.816	8.7	31	1
Q9BX82	Zinc finger protein 471 OS=Homo sapiens GN=ZNF471 PE=2 SV=1	3.51438	1	1	0	11	626	72.961	8.56	31	1
Q8NEP9	Zinc finger protein 555 OS=Homo sapiens GN=ZNF555 PE=1 SV=4	3.50318	2	2	0	2	628	73.037	9.04	31	2
Q32M78	Zinc finger protein 699 OS=Homo sapiens GN=ZNF699 PE=1 SV=1	1.7134	1	1	0	11	642	73.907	8.24	31	1
Q3ZCX4	Zinc finger protein 568 OS=Homo sapiens GN=ZNF568 PE=2 SV=2	3.10559	2	2	0	0	644	74.32	8.22	31	2
Q6PG37	Zinc finger protein 790 OS=Homo sapiens GN=ZNF790 PE=2 SV=2	3.14465	2	2	0	0	636	74.523	8.47	31	2
P15621	Zinc finger protein 44 OS=Homo sapiens GN=ZNF44 PE=2 SV=3	1.65913	1	1	0	11	663	76.473	8.68	31	1
Q8NDQ6	Zinc finger protein 540 OS=Homo sapiens GN=ZNF540 PE=1 SV=1	5	1	1	0	11	660	77.044	9.5	31	1
Q8N7M2	Zinc finger protein 283 OS=Homo sapiens GN=ZNF283 PE=2 SV=4	6.18557	2	2	0	0	679	77.891	8.28	31	2
O15060	Zinc finger and BTB domain-containing protein 39 OS=Homo sapiens GN=ZBTB39 PE=2 SV=1	1.54494	1	1	0	3	712	78.95	6.54	31	1
Q6ECI4	Zinc finger protein 470 OS=Homo sapiens GN=ZNF470 PE=2 SV=3	4.60251	1	1	0	11	717	82.597	8.57	31	1
Q86UE3	Zinc finger protein 546 OS=Homo sapiens GN=ZNF546 PE=2 SV=2	6.2201	3	3	0	1	836	98.341	8.6	31	3
Q8NHY6	Zinc finger protein 28 homolog OS=Homo sapiens GN=ZFP28 PE=1 SV=1	1.26728	1	1	0	11	868	98.642	9.32	31	1
P58012	Forkhead box protein L2 OS=Homo sapiens GN=FOXL2 PE=1 SV=1	2.92553	1	1	1	1	376	38.747	9.16	30.94	1
Q12946	Forkhead box protein F1 OS=Homo sapiens GN=FOXF1 PE=1 SV=2	2.90237	1	1	1	1	379	40.096	9.1	30.94	1
Q12947	Forkhead box protein F2 OS=Homo sapiens GN=FOXF2 PE=1 SV=2	2.47748	1	1	1	1	444	45.964	9	30.94	1
P02008	Hemoglobin subunit zeta OS=Homo sapiens GN=HBZ PE=1 SV=2	4.92958	1	1	1	1	142	15.627	8.21	30.89	1
Q86T29	Zinc finger protein 605 OS=Homo sapiens GN=ZNF605 PE=2 SV=1	1.24805	1	1	1	1	641	74.328	9.11	30.85	1
Q9P2R6	Arginine-glutamic acid dipeptide repeats protein OS=Homo sapiens GN=RERE PE=1 SV=2	0.766284	1	1	1	1	1566	172.317	7.69	30.77	1
Q92530	Proteasome inhibitor PI31 subunit OS=Homo sapiens GN=PSMF1 PE=1 SV=2	4.42804	1	1	1	1	271	29.798	5.74	30.69	1
Q15654	Thyroid receptor-interacting protein 6 OS=Homo sapiens GN=TRIP6 PE=1 SV=3	4.41176	1	2	1	1	476	50.255	7.37	30.5	1
Q13573	SNW domain-containing protein 1 OS=Homo sapiens GN=SNW1 PE=1 SV=1	2.61194	1	1	1	1	536	61.456	9.52	30.48	1
O00541	Pescadillo homolog OS=Homo sapiens GN=PES1 PE=1 SV=1	4.59184	2	2	2	1	588	67.96	7.33	30.45	2
Q9UMS4	Pre-mRNA-processing factor 19 OS=Homo sapiens GN=PRPF19 PE=1 SV=1	2.18254	1	1	1	1	504	55.146	6.61	30.41	1
Q6FI81	Anamorsin OS=Homo sapiens GN=CIAPIN1 PE=1 SV=2	8.65385	2	2	2	1	312	33.561	5.62	30.26	2
Q13401	Putative postmeiotic segregation increased 2-like protein 3 OS=Homo sapiens GN=PMS2P3 PE=5 SV=2	6.54762	1	1	1	1	168	18.704	4.63	30.25	1
O14654	Insulin receptor substrate 4 OS=Homo sapiens GN=IRS4 PE=1 SV=1	1.7502	2	2	2	1	1257	133.685	8.44	29.94	2
Q6ZN06	Zinc finger protein 813 OS=Homo sapiens GN=ZNF813 PE=2 SV=2	4.37601	3	3	0	0	617	71.674	9.36	29.82	3
P17039	Zinc finger protein 30 OS=Homo sapiens GN=ZNF30 PE=2 SV=5	6.58106	2	3	0	0	623	71.371	9.07	29.8165	2
Q96G25	Mediator of RNA polymerase II transcription subunit 8 OS=Homo sapiens GN=MED8 PE=1 SV=2	12.3134	2	2	2	1	268	29.062	7.44	29.73	2
O15541	RING finger protein 113A OS=Homo sapiens GN=RNF113A PE=1 SV=1	3.79009	1	1	1	1	343	38.763	5.69	29.71	1
O75525	KH domain-containing, RNA-binding, signal transduction-associated protein 3 OS=Homo sapiens GN=KHDRBS3 PE=1 SV=1	2.60116	1	1	1	1	346	38.776	7.61	29.19	1
Q5VWX1	KH domain-containing, RNA-binding, signal transduction-associated protein 2 OS=Homo sapiens GN=KHDRBS2 PE=1 SV=1	2.5788	1	1	1	1	349	38.904	6.29	29.19	1
Q16878	Cysteine dioxygenase type 1 OS=Homo sapiens GN=CDO1 PE=1 SV=2	3.5	1	1	1	1	200	22.957	6.6	29.09	1
O43913	Origin recognition complex subunit 5 OS=Homo sapiens GN=ORC5 PE=1 SV=1	4.82759	2	2	2	1	435	50.251	7.74	28.9206	2
Q13151	Heterogeneous nuclear ribonucleoprotein A0 OS=Homo sapiens GN=HNRNPA0 PE=1 SV=1	2.29508	1	1	0	2	305	30.822	9.29	28.8	1
P51991	Heterogeneous nuclear ribonucleoprotein A3 OS=Homo sapiens GN=HNRNPA3 PE=1 SV=2	1.85185	1	1	0	2	378	39.571	9.01	28.8	1
Q92769	Histone deacetylase 2 OS=Homo sapiens GN=HDAC2 PE=1 SV=2	2.45902	1	1	1	1	488	55.329	5.91	28.79	1
Q8TD26	Chromodomain-helicase-DNA-binding protein 6 OS=Homo sapiens GN=CHD6 PE=1 SV=4	0.331492	1	1	0	4	2715	305.22	6.27	28.79	1
Q3L8U1	Chromodomain-helicase-DNA-binding protein 9 OS=Homo sapiens GN=CHD9 PE=1 SV=2	0.310666	1	1	0	4	2897	325.819	7.01	28.79	1
Q9P2D1	Chromodomain-helicase-DNA-binding protein 7 OS=Homo sapiens GN=CHD7 PE=1 SV=3	0.800801	2	2	1	1	2997	335.717	6.34	28.79	2
P62318	Small nuclear ribonucleoprotein Sm D3 OS=Homo sapiens GN=SNRPD3 PE=1 SV=1	7.14286	1	1	1	1	126	13.907	10.32	28.78	1
P59923	Zinc finger protein 445 OS=Homo sapiens GN=ZNF445 PE=1 SV=1	2.23084	2	2	0	0	1031	118.887	9.39	28.74	2
Q96MU7	YTH domain-containing protein 1 OS=Homo sapiens GN=YTHDC1 PE=1 SV=3	5.36451	3	4	3	1	727	84.649	6.23	28.54	3
P10073	Zinc finger and SCAN domain-containing protein 22 OS=Homo sapiens GN=ZSCAN22 PE=1 SV=2	5.49898	1	2	1	1	491	54.527	7.55	28.52	1
Q58FF8	Putative heat shock protein HSP 90-beta 2 OS=Homo sapiens GN=HSP90AB2P PE=1 SV=2	5.51181	2	2	0	2	381	44.321	4.84	28.18	2
P51814	Zinc finger protein 41 OS=Homo sapiens GN=ZNF41 PE=1 SV=2	5.23752	2	2	1	1	821	93.668	8.79	28.1	2
P33992	DNA replication licensing factor MCM5 OS=Homo sapiens GN=MCM5 PE=1 SV=5	2.17984	1	1	1	1	734	82.233	8.37	28.09	1
Q7Z460	CLIP-associating protein 1 OS=Homo sapiens GN=CLASP1 PE=1 SV=1	0.715215	1	1	1	1	1538	169.346	9.03	27.92	1
P63220	40S ribosomal protein S21 OS=Homo sapiens GN=RPS21 PE=1 SV=1	12.0482	1	1	1	1	83	9.106	8.5	27.9	1
P43034	Platelet-activating factor acetylhydrolase IB subunit alpha OS=Homo sapiens GN=PAFAH1B1 PE=1 SV=2	8.53659	3	3	3	1	410	46.608	7.37	27.89	3
B2RPK0	Putative high mobility group protein B1-like 1 OS=Homo sapiens GN=HMGB1P1 PE=5 SV=1	7.109	1	2	1	1	211	24.223	6.21	27.88	1
Q2TB10	Zinc finger protein 800 OS=Homo sapiens GN=ZNF800 PE=1 SV=1	2.40964	2	2	2	1	664	75.189	9.47	27.8778	2
P12273	Prolactin-inducible protein OS=Homo sapiens GN=PIP PE=1 SV=1	5.47945	1	1	1	1	146	16.562	8.05	27.73	1
P79522	Proline-rich protein 3 OS=Homo sapiens GN=PRR3 PE=1 SV=2	9.04255	1	1	1	1	188	20.627	9.83	27.66	1
P07864	L-lactate dehydrogenase C chain OS=Homo sapiens GN=LDHC PE=1 SV=4	3.61446	1	1	1	1	332	36.288	7.46	27.59	1
Q6ZMR3	L-lactate dehydrogenase A-like 6A OS=Homo sapiens GN=LDHAL6A PE=2 SV=1	3.61446	1	1	1	1	332	36.484	6.99	27.59	1
P07195	L-lactate dehydrogenase B chain OS=Homo sapiens GN=LDHB PE=1 SV=2	3.59281	1	1	1	1	334	36.615	6.05	27.59	1
P00338	L-lactate dehydrogenase A chain OS=Homo sapiens GN=LDHA PE=1 SV=2	3.61446	1	1	1	1	332	36.665	8.27	27.59	1
P48739	Phosphatidylinositol transfer protein beta isoform OS=Homo sapiens GN=PITPNB PE=1 SV=2	13.6531	2	2	2	1	271	31.52	6.87	27.5	2
Q96MU6	Zinc finger protein 778 OS=Homo sapiens GN=ZNF778 PE=1 SV=3	3.29218	2	2	1	1	729	81.91	8.4	27.4465	2
P22234	Multifunctional protein ADE2 OS=Homo sapiens GN=PAICS PE=1 SV=3	2.35294	1	1	1	1	425	47.049	7.23	27.44	1
P46781	40S ribosomal protein S9 OS=Homo sapiens GN=RPS9 PE=1 SV=3	4.12371	1	1	1	1	194	22.578	10.65	27.19	1
Q92973	Transportin-1 OS=Homo sapiens GN=TNPO1 PE=1 SV=2	2.11581	1	1	1	1	898	102.289	4.98	27.06	1
P61247	40S ribosomal protein S3a OS=Homo sapiens GN=RPS3A PE=1 SV=2	3.40909	1	1	1	1	264	29.926	9.73	27.04	1
P49458	Signal recognition particle 9 kDa protein OS=Homo sapiens GN=SRP9 PE=1 SV=2	12.7907	1	1	1	1	86	10.105	7.97	26.91	1
Q68EA5	Zinc finger protein 57 OS=Homo sapiens GN=ZNF57 PE=2 SV=3	3.96396	2	2	2	1	555	64.385	8.76	26.79	2
Q16881	Thioredoxin reductase 1, cytoplasmic OS=Homo sapiens GN=TXNRD1 PE=1 SV=3	3.23575	2	2	2	1	649	70.862	7.39	26.65	2
Q4VC44	FLYWCH-type zinc finger-containing protein 1 OS=Homo sapiens GN=FLYWCH1 PE=1 SV=2	1.67598	1	1	1	1	716	80.058	8.34	26.36	1
P55209	Nucleosome assembly protein 1-like 1 OS=Homo sapiens GN=NAP1L1 PE=1 SV=1	5.37084	2	2	1	1	391	45.346	4.46	26.33	2
P50990	T-complex protein 1 subunit theta OS=Homo sapiens GN=CCT8 PE=1 SV=4	3.28467	1	1	1	1	548	59.583	5.6	26.32	1
O75533	Splicing factor 3B subunit 1 OS=Homo sapiens GN=SF3B1 PE=1 SV=3	2.53067	2	2	2	1	1304	145.738	7.09	26.2	2
O60749	Sorting nexin-2 OS=Homo sapiens GN=SNX2 PE=1 SV=2	2.11946	1	1	1	1	519	58.435	5.12	26.17	1
Q13596	Sorting nexin-1 OS=Homo sapiens GN=SNX1 PE=1 SV=3	2.10728	1	1	1	1	522	59.033	5.15	26.17	1
Q9NSB4	Keratin, type II cuticular Hb2 OS=Homo sapiens GN=KRT82 PE=3 SV=3	1.75439	1	1	0	0	513	56.616	6.74	26.16	1
Q9NSB2	Keratin, type II cuticular Hb4 OS=Homo sapiens GN=KRT84 PE=2 SV=2	2.66667	2	2	0	4	600	64.801	7.56	26.16	2
Q96DU9	Polyadenylate-binding protein 5 OS=Homo sapiens GN=PABPC5 PE=2 SV=1	2.35602	1	1	1	1	382	43.303	9.51	26.15	1
Q9NTI5	Sister chromatid cohesion protein PDS5 homolog B OS=Homo sapiens GN=PDS5B PE=1 SV=1	0.48376	1	1	0	0	1447	164.563	8.47	25.9	1
Q13315	Serine-protein kinase ATM OS=Homo sapiens GN=ATM PE=1 SV=4	0.229058	1	1	0	0	3056	350.462	6.81	25.9	1
Q6NX45	Zinc finger protein 774 OS=Homo sapiens GN=ZNF774 PE=1 SV=2	2.07039	1	1	1	1	483	55.032	8.34	25.87	1
Q15935	Zinc finger protein 77 OS=Homo sapiens GN=ZNF77 PE=2 SV=2	2.75229	1	1	0	0	545	61.923	8.69	25.78	1
Q5JVG2	Zinc finger protein 484 OS=Homo sapiens GN=ZNF484 PE=1 SV=1	6.80751	3	3	1	1	852	98.158	8.32	25.57	3
Q2M2I8	AP2-associated protein kinase 1 OS=Homo sapiens GN=AAK1 PE=1 SV=3	1.2487	1	1	1	1	961	103.821	6.6	25.48	1
P52732	Kinesin-like protein KIF11 OS=Homo sapiens GN=KIF11 PE=1 SV=2	0.852273	1	1	1	1	1056	119.085	5.64	25.46	1
P54259	Atrophin-1 OS=Homo sapiens GN=ATN1 PE=1 SV=3	1.0084	1	1	1	1	1190	125.338	8.98	25.43	1
Q8TD19	Serine/threonine-protein kinase Nek9 OS=Homo sapiens GN=NEK9 PE=1 SV=2	1.53218	1	1	1	1	979	107.1	5.74	25.39	1
P69892	Hemoglobin subunit gamma-2 OS=Homo sapiens GN=HBG2 PE=1 SV=2	6.80272	1	1	1	1	147	16.116	7.2	25.27	1
P69891	Hemoglobin subunit gamma-1 OS=Homo sapiens GN=HBG1 PE=1 SV=2	6.80272	1	1	1	1	147	16.13	7.2	25.27	1
P02100	Hemoglobin subunit epsilon OS=Homo sapiens GN=HBE1 PE=1 SV=2	6.80272	1	1	1	1	147	16.192	8.63	25.27	1
Q9UL59	Zinc finger protein 214 OS=Homo sapiens GN=ZNF214 PE=2 SV=2	1.48515	1	1	1	1	606	70.946	8.53	25.12	1
Q9UPP2	IQ motif and SEC7 domain-containing protein 3 OS=Homo sapiens GN=IQSEC3 PE=2 SV=3	0.676819	1	1	1	1	1182	127.541	6.51	24.92	1
Q8NI51	Transcriptional repressor CTCFL OS=Homo sapiens GN=CTCFL PE=1 SV=2	1.20664	1	1	1	1	663	75.698	8.24	24.79	1
P17812	CTP synthase 1 OS=Homo sapiens GN=CTPS1 PE=1 SV=2	2.03046	1	1	1	1	591	66.648	6.46	24.78	1
Q8NHS0	DnaJ homolog subfamily B member 8 OS=Homo sapiens GN=DNAJB8 PE=1 SV=1	4.31034	1	1	1	1	232	25.67	6.42	24.76	1
P25686	DnaJ homolog subfamily B member 2 OS=Homo sapiens GN=DNAJB2 PE=1 SV=3	3.08642	1	1	1	1	324	35.558	5.95	24.76	1
O75190	DnaJ homolog subfamily B member 6 OS=Homo sapiens GN=DNAJB6 PE=1 SV=2	3.06748	1	1	1	1	326	36.065	9.16	24.76	1
P09017	Homeobox protein Hox-C4 OS=Homo sapiens GN=HOXC4 PE=1 SV=2	18.9394	2	2	2	1	264	29.793	9.13	24.74	2
P18621	60S ribosomal protein L17 OS=Homo sapiens GN=RPL17 PE=1 SV=3	13.0435	2	2	2	1	184	21.383	10.17	24.73	2
O15355	Protein phosphatase 1G OS=Homo sapiens GN=PPM1G PE=1 SV=1	2.1978	1	1	1	1	546	59.235	4.36	24.73	1
Q6ZMS7	Protein ZNF783 OS=Homo sapiens GN=ZNF783 PE=1 SV=1	2.4911	1	1	1	1	281	31.403	4.96	24.72	1
Q9Y473	Zinc finger protein 175 OS=Homo sapiens GN=ZNF175 PE=1 SV=1	4.5007	2	2	1	1	711	81.557	8.66	24.5	2
Q96NG5	Zinc finger protein 558 OS=Homo sapiens GN=ZNF558 PE=2 SV=1	7.46269	2	2	0	0	402	45.726	8.95	24.42	2
P51508	Zinc finger protein 81 OS=Homo sapiens GN=ZNF81 PE=1 SV=3	2.26929	1	1	0	6	661	75.911	8.68	24.42	1
Q6P3V2	Zinc finger protein 585A OS=Homo sapiens GN=ZNF585A PE=2 SV=2	7.80234	2	2	0	0	769	87.917	9.06	24.42	2
Q52M93	Zinc finger protein 585B OS=Homo sapiens GN=ZNF585B PE=2 SV=1	3.90117	1	1	0	6	769	88.009	9.04	24.42	1
P51610	Host cell factor 1 OS=Homo sapiens GN=HCFC1 PE=1 SV=2	0.638821	1	1	1	1	2035	208.602	7.46	24.37	1
O95159	Zinc finger protein-like 1 OS=Homo sapiens GN=ZFPL1 PE=1 SV=2	2.90323	1	1	1	1	310	34.092	8.07	24.08	1
Q8IYB3	Serine/arginine repetitive matrix protein 1 OS=Homo sapiens GN=SRRM1 PE=1 SV=2	3.65044	3	3	3	1	904	102.274	11.84	24.04	3
O60925	Prefoldin subunit 1 OS=Homo sapiens GN=PFDN1 PE=1 SV=2	9.01639	1	1	1	1	122	14.202	6.81	23.54	1
Q15269	Periodic tryptophan protein 2 homolog OS=Homo sapiens GN=PWP2 PE=2 SV=2	1.19695	1	1	1	1	919	102.387	6.15	23.49	1
Q9Y4Z0	U6 snRNA-associated Sm-like protein LSm4 OS=Homo sapiens GN=LSM4 PE=1 SV=1	5.03597	1	1	1	1	139	15.34	9.99	23.39	1
P55884	Eukaryotic translation initiation factor 3 subunit B OS=Homo sapiens GN=EIF3B PE=1 SV=3	2.7027	2	2	2	1	814	92.424	5	23.35	2
Q8NFH3	Nucleoporin Nup43 OS=Homo sapiens GN=NUP43 PE=1 SV=1	4.47368	1	1	1	1	380	42.124	5.63	23.31	1
Q6DCA0	AMMECR1-like protein OS=Homo sapiens GN=AMMECR1L PE=1 SV=1	2.90323	1	1	1	1	310	34.477	8.98	23.02	1
Q9Y4X0	AMME syndrome candidate gene 1 protein OS=Homo sapiens GN=AMMECR1 PE=1 SV=1	2.7027	1	1	1	1	333	35.44	8.63	23.02	1
Q92928	Putative Ras-related protein Rab-1C OS=Homo sapiens GN=RAB1C PE=5 SV=2	5.47264	1	1	1	1	201	22.003	5.43	22.92	1
Q9H0U4	Ras-related protein Rab-1B OS=Homo sapiens GN=RAB1B PE=1 SV=1	5.47264	1	1	1	1	201	22.157	5.73	22.92	1
P61026	Ras-related protein Rab-10 OS=Homo sapiens GN=RAB10 PE=1 SV=1	5.5	1	1	1	1	200	22.527	8.38	22.92	1
P62820	Ras-related protein Rab-1A OS=Homo sapiens GN=RAB1A PE=1 SV=3	5.36585	1	1	1	1	205	22.663	6.21	22.92	1
Q15286	Ras-related protein Rab-35 OS=Homo sapiens GN=RAB35 PE=1 SV=1	5.47264	1	1	1	1	201	23.011	8.29	22.92	1
Q15771	Ras-related protein Rab-30 OS=Homo sapiens GN=RAB30 PE=1 SV=2	5.41872	1	1	1	1	203	23.044	4.97	22.92	1
Q86YS6	Ras-related protein Rab-43 OS=Homo sapiens GN=RAB43 PE=1 SV=1	5.18868	1	1	1	1	212	23.325	5.64	22.92	1
Q9NRW1	Ras-related protein Rab-6B OS=Homo sapiens GN=RAB6B PE=1 SV=1	5.28846	1	1	1	1	208	23.447	5.53	22.92	1
Q92930	Ras-related protein Rab-8B OS=Homo sapiens GN=RAB8B PE=1 SV=2	5.31401	1	1	1	1	207	23.569	9.07	22.92	1
P61018	Ras-related protein Rab-4B OS=Homo sapiens GN=RAB4B PE=1 SV=1	5.16432	1	1	1	1	213	23.572	6.06	22.92	1
P20340	Ras-related protein Rab-6A OS=Homo sapiens GN=RAB6A PE=1 SV=3	5.28846	1	1	1	1	208	23.578	5.54	22.92	1
P61006	Ras-related protein Rab-8A OS=Homo sapiens GN=RAB8A PE=1 SV=1	5.31401	1	1	1	1	207	23.653	9.07	22.92	1
P61106	Ras-related protein Rab-14 OS=Homo sapiens GN=RAB14 PE=1 SV=4	5.11628	1	1	1	1	215	23.882	6.21	22.92	1
O95716	Ras-related protein Rab-3D OS=Homo sapiens GN=RAB3D PE=1 SV=1	5.02283	1	1	1	1	219	24.252	4.93	22.92	1
P20338	Ras-related protein Rab-4A OS=Homo sapiens GN=RAB4A PE=1 SV=3	5.04587	1	1	1	1	218	24.374	6.07	22.92	1
P59190	Ras-related protein Rab-15 OS=Homo sapiens GN=RAB15 PE=1 SV=1	5.18868	1	1	1	1	212	24.375	5.71	22.92	1
Q96DA2	Ras-related protein Rab-39B OS=Homo sapiens GN=RAB39B PE=1 SV=1	5.16432	1	1	1	1	213	24.607	7.83	22.92	1
P20337	Ras-related protein Rab-3B OS=Homo sapiens GN=RAB3B PE=1 SV=2	5.02283	1	1	1	1	219	24.742	5.02	22.92	1
Q96AX2	Ras-related protein Rab-37 OS=Homo sapiens GN=RAB37 PE=1 SV=3	4.93274	1	1	1	1	223	24.799	6.35	22.92	1
P20336	Ras-related protein Rab-3A OS=Homo sapiens GN=RAB3A PE=1 SV=1	5	1	1	1	1	220	24.968	5.03	22.92	1
Q14964	Ras-related protein Rab-39A OS=Homo sapiens GN=RAB39A PE=1 SV=2	5.06912	1	1	1	1	217	24.991	7.65	22.92	1
Q9H082	Ras-related protein Rab-33B OS=Homo sapiens GN=RAB33B PE=1 SV=1	4.80349	1	1	1	1	229	25.701	7.18	22.92	1
Q96E17	Ras-related protein Rab-3C OS=Homo sapiens GN=RAB3C PE=2 SV=1	4.84581	1	1	1	1	227	25.936	5.24	22.92	1
Q6IQ22	Ras-related protein Rab-12 OS=Homo sapiens GN=RAB12 PE=1 SV=3	4.5082	1	1	1	1	244	27.231	8.41	22.92	1
Q96EA4	Protein Spindly OS=Homo sapiens GN=SPDL1 PE=1 SV=2	1.81818	1	1	1	1	605	70.128	5.47	22.84	1
Q9UKA9	Polypyrimidine tract-binding protein 2 OS=Homo sapiens GN=PTBP2 PE=1 SV=1	1.50659	1	1	1	1	531	57.455	8.66	22.77	1
O95758	Polypyrimidine tract-binding protein 3 OS=Homo sapiens GN=PTBP3 PE=1 SV=2	2.71739	2	2	2	1	552	59.652	9.04	22.77	2
Q9P258	Protein RCC2 OS=Homo sapiens GN=RCC2 PE=1 SV=2	1.341	1	1	1	1	522	56.049	8.78	22.66	1
Q9UK12	Zinc finger protein 222 OS=Homo sapiens GN=ZNF222 PE=2 SV=2	3.7694	2	2	0	1	451	52.45	8.63	22.62	2
Q13360	Zinc finger protein 177 OS=Homo sapiens GN=ZNF177 PE=1 SV=4	1.6632	1	1	0	2	481	54.746	8.18	22.62	1
Q9UK11	Zinc finger protein 223 OS=Homo sapiens GN=ZNF223 PE=1 SV=2	3.52697	2	2	0	1	482	55.726	8.73	22.62	2
Q9UL58	Zinc finger protein 215 OS=Homo sapiens GN=ZNF215 PE=2 SV=2	1.54739	1	1	0	0	517	59.996	8.72	22.62	1
Q12901	Zinc finger protein 155 OS=Homo sapiens GN=ZNF155 PE=1 SV=4	3.15985	2	2	0	1	538	62.041	8.46	22.62	2
Q2VY69	Zinc finger protein 284 OS=Homo sapiens GN=ZNF284 PE=2 SV=1	5.90219	2	3	0	1	593	68.974	8.4	22.62	2
Q02386	Zinc finger protein 45 OS=Homo sapiens GN=ZNF45 PE=2 SV=2	1.17302	1	1	0	2	682	78.192	8.66	22.62	1
Q14590	Zinc finger protein 235 OS=Homo sapiens GN=ZNF235 PE=2 SV=3	2.84553	2	2	1	1	738	83.923	8.56	22.62	2
Q9UJU3	Zinc finger protein 112 OS=Homo sapiens GN=ZNF112 PE=2 SV=2	0.876232	1	1	0	2	913	105.775	8.27	22.62	1
Q6NVV1	Putative 60S ribosomal protein L13a protein RPL13AP3 OS=Homo sapiens GN=RPL13AP3 PE=5 SV=1	7.84314	1	1	1	1	102	12.127	10.76	22.56	1
P40429	60S ribosomal protein L13a OS=Homo sapiens GN=RPL13A PE=1 SV=2	3.94089	1	1	1	1	203	23.562	10.93	22.56	1
P25311	Zinc-alpha-2-glycoprotein OS=Homo sapiens GN=AZGP1 PE=1 SV=2	9.0604	2	2	2	1	298	34.237	6.05	22.53	2
Q96SI9	Spermatid perinuclear RNA-binding protein OS=Homo sapiens GN=STRBP PE=1 SV=1	1.33929	1	1	1	1	672	73.606	8.72	22.26	1
Q9NQX1	PR domain zinc finger protein 5 OS=Homo sapiens GN=PRDM5 PE=1 SV=2	1.74603	1	1	1	1	630	73.043	8.81	22.13	1
Q92900	Regulator of nonsense transcripts 1 OS=Homo sapiens GN=UPF1 PE=1 SV=2	0.974314	1	1	1	1	1129	124.267	6.61	22.04	1
Q8TEW0	Partitioning defective 3 homolog OS=Homo sapiens GN=PARD3 PE=1 SV=2	0.811209	1	1	1	1	1356	151.33	7.68	22.03	1
O75290	Zinc finger protein 780A OS=Homo sapiens GN=ZNF780A PE=2 SV=3	2.65211	2	2	1	1	641	74.483	8.65	21.97	2
Q6NXE6	Armadillo repeat-containing protein 6 OS=Homo sapiens GN=ARMC6 PE=1 SV=2	2.99401	1	1	1	1	501	54.107	6.24	21.7	1
P08579	U2 small nuclear ribonucleoprotein B'' OS=Homo sapiens GN=SNRPB2 PE=1 SV=1	3.55556	1	1	1	1	225	25.47	9.72	21.57	1
P09012	U1 small nuclear ribonucleoprotein A OS=Homo sapiens GN=SNRPA PE=1 SV=3	2.83688	1	1	1	1	282	31.259	9.83	21.57	1
Q00341	Vigilin OS=Homo sapiens GN=HDLBP PE=1 SV=2	1.02524	1	1	1	1	1268	141.368	6.87	21.49	1
Q92616	eIF-2-alpha kinase activator GCN1 OS=Homo sapiens GN=GCN1 PE=1 SV=6	0.299513	1	1	0	0	2671	292.572	7.47	21.32	1
P29401	Transketolase OS=Homo sapiens GN=TKT PE=1 SV=3	3.5313	1	1	1	1	623	67.835	7.66	21.28	1
P16415	Zinc finger protein 823 OS=Homo sapiens GN=ZNF823 PE=2 SV=2	3.11475	2	2	2	1	610	70.225	8.72	21.27	2
Q04760	Lactoylglutathione lyase OS=Homo sapiens GN=GLO1 PE=1 SV=4	4.8913	1	1	1	1	184	20.764	5.31	21.2	1
O75146	Huntingtin-interacting protein 1-related protein OS=Homo sapiens GN=HIP1R PE=1 SV=2	0.842697	1	1	1	1	1068	119.315	6.67	21.12	1
Q96SL8	Flt3-interacting zinc finger protein 1 OS=Homo sapiens GN=FIZ1 PE=1 SV=2	2.41935	1	1	1	1	496	51.962	8.19	21.11	1
Q96AQ6	Pre-B-cell leukemia transcription factor-interacting protein 1 OS=Homo sapiens GN=PBXIP1 PE=1 SV=1	1.36799	1	1	1	1	731	80.594	5.33	20.78	1
Q9BSG1	Zinc finger protein 2 OS=Homo sapiens GN=ZNF2 PE=1 SV=4	3.52113	1	2	0	0	426	48.832	8.57	20.74	1
Q6ZNA1	Zinc finger protein 836 OS=Homo sapiens GN=ZNF836 PE=2 SV=2	1.60256	1	2	0	0	936	107.647	9.22	20.74	1
P51654	Glypican-3 OS=Homo sapiens GN=GPC3 PE=1 SV=1	2.58621	1	7	1	1	580	65.52	6.37	20.65	1
Q00535	Cyclin-dependent-like kinase 5 OS=Homo sapiens GN=CDK5 PE=1 SV=3	2.73973	1	1	1	1	292	33.283	7.66	20.56	1
P11802	Cyclin-dependent kinase 4 OS=Homo sapiens GN=CDK4 PE=1 SV=2	2.64026	1	1	1	1	303	33.708	7.01	20.56	1
P24941	Cyclin-dependent kinase 2 OS=Homo sapiens GN=CDK2 PE=1 SV=2	2.68456	1	1	1	1	298	33.908	8.68	20.56	1
P06493	Cyclin-dependent kinase 1 OS=Homo sapiens GN=CDK1 PE=1 SV=3	2.6936	1	1	1	1	297	34.074	8.4	20.56	1
Q00526	Cyclin-dependent kinase 3 OS=Homo sapiens GN=CDK3 PE=1 SV=1	2.62295	1	1	1	1	305	35.024	8.79	20.56	1
Q00534	Cyclin-dependent kinase 6 OS=Homo sapiens GN=CDK6 PE=1 SV=1	2.45399	1	1	1	1	326	36.915	6.46	20.56	1
Q8IZL9	Cyclin-dependent kinase 20 OS=Homo sapiens GN=CDK20 PE=1 SV=1	2.31214	1	1	1	1	346	38.67	6.76	20.56	1
P50750	Cyclin-dependent kinase 9 OS=Homo sapiens GN=CDK9 PE=1 SV=3	4.56989	2	2	2	1	372	42.75	8.79	20.56	2
Q96Q40	Cyclin-dependent kinase 15 OS=Homo sapiens GN=CDK15 PE=1 SV=2	1.83908	1	1	1	1	435	48.992	7.14	20.56	1
O94921	Cyclin-dependent kinase 14 OS=Homo sapiens GN=CDK14 PE=1 SV=3	1.70576	1	1	1	1	469	53.023	8.92	20.56	1
Q07002	Cyclin-dependent kinase 18 OS=Homo sapiens GN=CDK18 PE=1 SV=3	1.69492	1	1	1	1	472	54.146	8.66	20.56	1
Q00536	Cyclin-dependent kinase 16 OS=Homo sapiens GN=CDK16 PE=1 SV=1	1.6129	1	1	1	1	496	55.681	7.62	20.56	1
P51451	Tyrosine-protein kinase Blk OS=Homo sapiens GN=BLK PE=1 SV=3	1.58416	1	1	1	1	505	57.67	7.87	20.56	1
P06239	Tyrosine-protein kinase Lck OS=Homo sapiens GN=LCK PE=1 SV=6	1.57171	1	1	1	1	509	57.964	5.36	20.56	1
P07948	Tyrosine-protein kinase Lyn OS=Homo sapiens GN=LYN PE=1 SV=3	1.5625	1	1	1	1	512	58.537	7.11	20.56	1
P09769	Tyrosine-protein kinase Fgr OS=Homo sapiens GN=FGR PE=1 SV=2	1.51229	1	1	1	1	529	59.441	5.59	20.56	1
Q00537	Cyclin-dependent kinase 17 OS=Homo sapiens GN=CDK17 PE=1 SV=2	1.52964	1	1	1	1	523	59.545	9.03	20.56	1
P08631	Tyrosine-protein kinase HCK OS=Homo sapiens GN=HCK PE=1 SV=5	1.52091	1	1	1	1	526	59.562	6.7	20.56	1
P06241	Tyrosine-protein kinase Fyn OS=Homo sapiens GN=FYN PE=1 SV=3	1.48976	1	1	1	1	537	60.723	6.67	20.56	1
P07947	Tyrosine-protein kinase Yes OS=Homo sapiens GN=YES1 PE=1 SV=3	1.4733	1	1	1	1	543	60.763	6.74	20.56	1
P20794	Serine/threonine-protein kinase MAK OS=Homo sapiens GN=MAK PE=1 SV=2	1.28411	1	1	1	1	623	70.536	9.66	20.56	1
Q9UPZ9	Serine/threonine-protein kinase ICK OS=Homo sapiens GN=ICK PE=1 SV=1	1.26582	1	1	1	1	632	71.382	9.77	20.56	1
P22607	Fibroblast growth factor receptor 3 OS=Homo sapiens GN=FGFR3 PE=1 SV=1	0.992556	1	1	1	1	806	87.654	5.9	20.56	1
P22455	Fibroblast growth factor receptor 4 OS=Homo sapiens GN=FGFR4 PE=1 SV=2	0.997506	1	1	1	1	802	87.899	6.81	20.56	1
P11362	Fibroblast growth factor receptor 1 OS=Homo sapiens GN=FGFR1 PE=1 SV=3	0.973236	1	1	1	1	822	91.809	6.21	20.56	1
P21802	Fibroblast growth factor receptor 2 OS=Homo sapiens GN=FGFR2 PE=1 SV=1	0.974421	1	1	1	1	821	91.966	5.88	20.56	1
Q9H2Y7	Zinc finger protein 106 OS=Homo sapiens GN=ZNF106 PE=1 SV=1	1.5401	2	2	2	1	1883	208.754	7.15	20.46	2
Q8IYB9	Zinc finger protein 595 OS=Homo sapiens GN=ZNF595 PE=2 SV=1	2.77778	2	2	1	0	648	74.242	9.11	20.41	2
P11171	Protein 4.1 OS=Homo sapiens GN=EPB41 PE=1 SV=4	1.38889	1	1	1	1	864	96.957	5.58	20.33	1
P22059	Oxysterol-binding protein 1 OS=Homo sapiens GN=OSBP PE=1 SV=1	1.6109	1	1	1	1	807	89.365	7.3	20.31	1
P20290	Transcription factor BTF3 OS=Homo sapiens GN=BTF3 PE=1 SV=1	9.2233	1	1	1	1	206	22.154	9.38	20.28	1
Q96LW1	Zinc finger protein 354B OS=Homo sapiens GN=ZNF354B PE=2 SV=1	8.16993	4	4	2	1	612	70.484	9.5	20.2	4
Q5T0B9	Zinc finger protein 362 OS=Homo sapiens GN=ZNF362 PE=1 SV=1	3.09524	1	1	1	1	420	45.785	9.64	20.05	1
Q15059	Bromodomain-containing protein 3 OS=Homo sapiens GN=BRD3 PE=1 SV=1	1.79063	1	1	1	1	726	79.492	9.36	20.05	1
Q9NRN7	L-aminoadipate-semialdehyde dehydrogenase-phosphopantetheinyl transferase OS=Homo sapiens GN=AASDHPPT PE=1 SV=2	2.91262	1	1	1	1	309	35.753	6.8	19.94	1
Q9BQ39	ATP-dependent RNA helicase DDX50 OS=Homo sapiens GN=DDX50 PE=1 SV=1	2.98507	2	2	2	1	737	82.514	9.17	19.93	2
Q9Y3U8	60S ribosomal protein L36 OS=Homo sapiens GN=RPL36 PE=1 SV=3	8.57143	1	1	1	1	105	12.246	11.59	19.86	1
Q5VT52	Regulation of nuclear pre-mRNA domain-containing protein 2 OS=Homo sapiens GN=RPRD2 PE=1 SV=1	1.02669	1	1	1	1	1461	155.924	7.42	19.73	1
Q9H0C8	Integrin-linked kinase-associated serine/threonine phosphatase 2C OS=Homo sapiens GN=ILKAP PE=1 SV=1	3.06122	1	1	1	1	392	42.88	7.09	19.72	1
Q96FX8	p53 apoptosis effector related to PMP-22 OS=Homo sapiens GN=PERP PE=2 SV=1	8.80829	1	2	1	1	193	21.372	7.03	19.66	1
P01040	Cystatin-A OS=Homo sapiens GN=CSTA PE=1 SV=1	7.14286	1	1	1	1	98	11	5.5	19.5	1
Q9UKN8	General transcription factor 3C polypeptide 4 OS=Homo sapiens GN=GTF3C4 PE=1 SV=2	1.21655	1	1	1	1	822	91.923	6.65	19.5	1
Q6PK81	Zinc finger protein 773 OS=Homo sapiens GN=ZNF773 PE=2 SV=1	2.26244	1	1	1	1	442	50.47	8.94	19.35	1
Q8TBZ8	Zinc finger protein 564 OS=Homo sapiens GN=ZNF564 PE=1 SV=1	1.80832	1	1	1	1	553	63.694	8.68	19.35	1
Q15929	Putative zinc finger protein 56 OS=Homo sapiens GN=ZNF56 PE=5 SV=2	4.96894	1	1	0	13	161	18.639	8.56	19.32	1
Q8IYX0	Zinc finger protein 679 OS=Homo sapiens GN=ZNF679 PE=1 SV=2	4.37956	2	2	0	1	411	47.148	8.91	19.32	2
P0CB33	Putative zinc finger protein 735 OS=Homo sapiens GN=ZNF735 PE=5 SV=1	4.36893	2	2	0	1	412	47.534	9.11	19.32	2
Q5FWF6	Zinc finger protein 789 OS=Homo sapiens GN=ZNF789 PE=2 SV=3	1.88235	1	1	0	13	425	49.952	9.1	19.32	1
Q8N859	Zinc finger protein 713 OS=Homo sapiens GN=ZNF713 PE=2 SV=1	5.34884	2	2	1	1	430	50.14	6.98	19.32	2
Q5JVG8	Zinc finger protein 506 OS=Homo sapiens GN=ZNF506 PE=2 SV=2	6.30631	2	2	0	1	444	51.503	9.29	19.32	2
Q8N9Z0	Zinc finger protein 610 OS=Homo sapiens GN=ZNF610 PE=2 SV=2	1.7316	1	1	0	13	462	53.455	9.2	19.32	1
Q96H40	Zinc finger protein 486 OS=Homo sapiens GN=ZNF486 PE=2 SV=4	3.88769	2	2	0	1	463	53.596	9.1	19.32	2
Q15928	Zinc finger protein 141 OS=Homo sapiens GN=ZNF141 PE=1 SV=1	3.79747	2	2	0	1	474	55.214	9.31	19.32	2
Q3SXZ3	Zinc finger protein 718 OS=Homo sapiens GN=ZNF718 PE=2 SV=1	1.67364	1	1	0	13	478	55.369	9.45	19.32	1
A6NP11	Zinc finger protein 716 OS=Homo sapiens GN=ZNF716 PE=2 SV=4	1.61616	1	1	0	13	495	56.969	9.17	19.32	1
O75346	Zinc finger protein 253 OS=Homo sapiens GN=ZNF253 PE=2 SV=2	1.60321	1	1	0	13	499	57.565	9.16	19.32	1
Q8IW36	Zinc finger protein 695 OS=Homo sapiens GN=ZNF695 PE=1 SV=4	1.5534	1	1	0	13	515	60.109	8.65	19.32	1
Q96JC4	Zinc finger protein 479 OS=Homo sapiens GN=ZNF479 PE=2 SV=1	3.43511	2	2	0	1	524	60.559	8.95	19.32	2
Q8WV37	Zinc finger protein 480 OS=Homo sapiens GN=ZNF480 PE=1 SV=2	1.49533	1	1	0	13	535	61.669	9.06	19.32	1
O75373	Zinc finger protein 737 OS=Homo sapiens GN=ZNF737 PE=2 SV=3	5.03731	3	3	0	0	536	61.891	9.26	19.32	3
Q8TB69	Zinc finger protein 519 OS=Homo sapiens GN=ZNF519 PE=2 SV=2	4.81481	2	2	0	2	540	62.979	9.36	19.32	2
A8MT65	Zinc finger protein 891 OS=Homo sapiens GN=ZNF891 PE=2 SV=2	1.47059	1	1	0	13	544	63.55	8.73	19.32	1
Q9Y2Q1	Zinc finger protein 257 OS=Homo sapiens GN=ZNF257 PE=2 SV=2	8.52575	2	2	0	1	563	65.736	9.01	19.32	2
A6NK75	Zinc finger protein 98 OS=Homo sapiens GN=ZNF98 PE=2 SV=4	3.14685	2	2	0	2	572	65.756	9.17	19.32	2
Q6ZN08	Putative zinc finger protein 66 OS=Homo sapiens GN=ZNF66 PE=5 SV=3	4.88656	2	2	0	1	573	65.831	9.33	19.32	2
B4DXR9	Zinc finger protein 732 OS=Homo sapiens GN=ZNF732 PE=2 SV=1	3.07692	2	2	0	1	585	67.796	8.98	19.32	2
Q86XU0	Zinc finger protein 677 OS=Homo sapiens GN=ZNF677 PE=2 SV=1	3.93836	2	2	0	0	584	67.953	9.13	19.32	2
Q03938	Zinc finger protein 90 OS=Homo sapiens GN=ZNF90 PE=2 SV=3	1.33111	1	1	0	13	601	69.013	9.22	19.32	1
P0DKX0	Zinc finger protein 728 OS=Homo sapiens GN=ZNF728 PE=3 SV=1	2.89389	2	2	0	2	622	71.754	9.14	19.32	2
Q3MIS6	Zinc finger protein 528 OS=Homo sapiens GN=ZNF528 PE=2 SV=1	2.70701	2	2	1	0	628	72.092	9.19	19.32	2
O14628	Zinc finger protein 195 OS=Homo sapiens GN=ZNF195 PE=1 SV=2	1.27186	1	1	0	13	629	72.285	8.09	19.32	1
Q96JL9	Zinc finger protein 333 OS=Homo sapiens GN=ZNF333 PE=2 SV=3	1.20301	1	1	0	13	665	75.496	7.94	19.32	1
Q76KX8	Zinc finger protein 534 OS=Homo sapiens GN=ZNF534 PE=2 SV=1	1.18694	1	1	0	13	674	77.117	9.25	19.32	1
Q86YE8	Zinc finger protein 573 OS=Homo sapiens GN=ZNF573 PE=2 SV=4	1.20301	1	1	0	13	665	78.131	9.16	19.32	1
A6NNF4	Zinc finger protein 726 OS=Homo sapiens GN=ZNF726 PE=2 SV=4	7.85908	2	2	0	2	738	85.483	9.09	19.32	2
Q96SE7	Zinc finger protein 347 OS=Homo sapiens GN=ZNF347 PE=1 SV=2	0.953516	1	1	0	13	839	95.709	9.17	19.32	1
A8MXY4	Zinc finger protein 99 OS=Homo sapiens GN=ZNF99 PE=2 SV=3	0.925926	1	1	0	2	864	100.725	9.45	19.32	1
O43345	Zinc finger protein 208 OS=Homo sapiens GN=ZNF208 PE=2 SV=2	0.625	1	1	0	2	1280	147.39	9.01	19.32	1
Q9Y618	Nuclear receptor corepressor 2 OS=Homo sapiens GN=NCOR2 PE=1 SV=2	2.09901	3	3	3	1	2525	274.635	7.59	19.24	3
P04792	Heat shock protein beta-1 OS=Homo sapiens GN=HSPB1 PE=1 SV=2	7.80488	1	1	1	1	205	22.768	6.4	18.83	1
Q9UPG8	Zinc finger protein PLAGL2 OS=Homo sapiens GN=PLAGL2 PE=2 SV=1	2.41935	1	1	1	1	496	54.548	8.65	18.63	1
Q9UJU6	Drebrin-like protein OS=Homo sapiens GN=DBNL PE=1 SV=1	3.25581	1	1	1	1	430	48.178	5.05	18.61	1
Q13283	Ras GTPase-activating protein-binding protein 1 OS=Homo sapiens GN=G3BP1 PE=1 SV=1	3.21888	1	1	1	1	466	52.132	5.52	18.54	1
Q96E39	RNA binding motif protein, X-linked-like-1 OS=Homo sapiens GN=RBMXL1 PE=1 SV=1	7.94872	3	3	3	1	390	42.116	9.89	18.39	3
P38159	RNA-binding motif protein, X chromosome OS=Homo sapiens GN=RBMX PE=1 SV=3	7.92839	3	3	3	1	391	42.306	10.05	18.39	3
O75526	RNA-binding motif protein, X-linked-like-2 OS=Homo sapiens GN=RBMXL2 PE=1 SV=3	3.57143	1	1	1	1	392	42.788	10.32	18.39	1
Q8N7X1	RNA-binding motif protein, X-linked-like-3 OS=Homo sapiens GN=RBMXL3 PE=2 SV=2	1.31209	1	1	1	1	1067	114.868	9.1	18.39	1
Q58FG0	Putative heat shock protein HSP 90-alpha A5 OS=Homo sapiens GN=HSP90AA5P PE=2 SV=1	4.49102	1	1	1	1	334	38.714	6.57	18.05	1
Q9H7X3	Zinc finger protein 696 OS=Homo sapiens GN=ZNF696 PE=2 SV=2	3.20856	1	1	1	1	374	40.549	8.92	17.81	1
P12268	Inosine-5'-monophosphate dehydrogenase 2 OS=Homo sapiens GN=IMPDH2 PE=1 SV=2	3.50195	1	1	1	1	514	55.77	6.9	17.5	1
Q15475	Homeobox protein SIX1 OS=Homo sapiens GN=SIX1 PE=1 SV=1	4.22535	1	1	1	1	284	32.19	9.14	17.35	1
Q9NPC8	Homeobox protein SIX2 OS=Homo sapiens GN=SIX2 PE=1 SV=1	4.12371	1	1	1	1	291	32.266	9.01	17.35	1
Q01804	OTU domain-containing protein 4 OS=Homo sapiens GN=OTUD4 PE=1 SV=4	0.987433	1	1	1	1	1114	123.968	6.71	17.27	1
Q9UIG0	Tyrosine-protein kinase BAZ1B OS=Homo sapiens GN=BAZ1B PE=1 SV=2	1.61834	2	2	2	1	1483	170.796	8.48	17.25	2
A6NDR6	Putative homeobox protein Meis3-like 1 OS=Homo sapiens GN=MEIS3P1 PE=5 SV=2	2.91971	1	1	1	1	274	30.186	4.98	16.88	1
A8K0S8	Putative homeobox protein Meis3-like 2 OS=Homo sapiens GN=MEIS3P2 PE=2 SV=1	2.23464	1	1	1	1	358	39.195	5.05	16.88	1
Q99687	Homeobox protein Meis3 OS=Homo sapiens GN=MEIS3 PE=2 SV=3	2.13333	1	1	1	1	375	41.089	5.19	16.88	1
O14770	Homeobox protein Meis2 OS=Homo sapiens GN=MEIS2 PE=1 SV=2	5.24109	2	2	2	1	477	51.757	6.4	16.88	2
Q6P9G9	Zinc finger protein 449 OS=Homo sapiens GN=ZNF449 PE=1 SV=3	1.73745	1	1	1	1	518	59.894	7.31	16.88	1
P78347	General transcription factor II-I OS=Homo sapiens GN=GTF2I PE=1 SV=2	0.801603	1	1	1	1	998	112.346	6.39	16.72	1
P0DN79	Cystathionine beta-synthase-like protein OS=Homo sapiens GN=CBSL PE=1 SV=1	3.44828	2	2	2	1	551	60.548	6.65	16.63	2
Q9NUQ3	Gamma-taxilin OS=Homo sapiens GN=TXLNG PE=1 SV=2	3.59848	1	1	1	1	528	60.548	7.52	16.61	1
E7ETH6	Zinc finger protein 587B OS=Homo sapiens GN=ZNF587B PE=1 SV=1	8.95522	2	2	2	1	402	45.512	8.38	16.58	2
B7Z6K7	Putative uncharacterized zinc finger protein 814 OS=Homo sapiens GN=ZNF814 PE=1 SV=2	4.21053	2	2	2	1	855	97.275	8.85	16.58	2
Q99536	Synaptic vesicle membrane protein VAT-1 homolog OS=Homo sapiens GN=VAT1 PE=1 SV=2	4.07125	1	1	1	1	393	41.893	6.29	16.47	1
Q9Y5T5	Ubiquitin carboxyl-terminal hydrolase 16 OS=Homo sapiens GN=USP16 PE=1 SV=1	2.18712	1	1	1	1	823	93.511	6.93	16.24	1
Q92625	Ankyrin repeat and SAM domain-containing protein 1A OS=Homo sapiens GN=ANKS1A PE=1 SV=4	3.88007	2	2	2	1	1134	123.032	6.38	16.15	2
P09874	Poly [ADP-ribose] polymerase 1 OS=Homo sapiens GN=PARP1 PE=1 SV=4	3.5503	3	3	3	1	1014	113.012	8.88	16.11	3
Q9Y3T9	Nucleolar complex protein 2 homolog OS=Homo sapiens GN=NOC2L PE=1 SV=4	1.33511	1	1	1	1	749	84.866	5.62	15.94	1
O15042	U2 snRNP-associated SURP motif-containing protein OS=Homo sapiens GN=U2SURP PE=1 SV=2	1.94363	2	2	2	1	1029	118.219	8.47	15.84	2
Q9BTC0	Death-inducer obliterator 1 OS=Homo sapiens GN=DIDO1 PE=1 SV=5	0.3125	1	1	1	1	2240	243.723	7.88	15.79	1
P54136	Arginine--tRNA ligase, cytoplasmic OS=Homo sapiens GN=RARS PE=1 SV=2	1.36364	1	1	1	1	660	75.331	6.68	15.67	1
O00148	ATP-dependent RNA helicase DDX39A OS=Homo sapiens GN=DDX39A PE=1 SV=2	2.34192	1	1	1	1	427	49.098	5.68	15.52	1
Q9H9D4	Zinc finger protein 408 OS=Homo sapiens GN=ZNF408 PE=1 SV=1	2.22222	1	1	1	1	720	78.389	7.24	15.23	1
Q9Y3C1	Nucleolar protein 16 OS=Homo sapiens GN=NOP16 PE=1 SV=2	6.17978	1	1	1	1	178	21.175	9.94	15.17	1
Q15697	Zinc finger protein 174 OS=Homo sapiens GN=ZNF174 PE=1 SV=1	6.14251	2	2	2	1	407	46.425	9.58	14.88	2
P51786	Zinc finger protein 157 OS=Homo sapiens GN=ZNF157 PE=2 SV=2	5.92885	2	2	2	0	506	58.253	8.47	14.88	2
Q9BRR0	Zinc finger protein with KRAB and SCAN domains 3 OS=Homo sapiens GN=ZKSCAN3 PE=1 SV=2	2.7881	1	1	0	0	538	60.603	6.4	14.88	1
Q96NL3	Zinc finger protein 599 OS=Homo sapiens GN=ZNF599 PE=1 SV=1	2.55102	1	1	1	1	588	67.448	8.37	14.88	1
P52742	Zinc finger protein 135 OS=Homo sapiens GN=ZNF135 PE=2 SV=3	4.55927	2	2	1	0	658	75.213	8.15	14.88	2
Q2M218	Zinc finger protein 630 OS=Homo sapiens GN=ZNF630 PE=2 SV=1	2.28311	1	1	0	0	657	76.044	8.78	14.88	1
A6NDX5	Putative zinc finger protein 840 OS=Homo sapiens GN=ZNF840P PE=5 SV=5	4.18994	1	1	1	1	716	83.181	9.61	14.88	1
Q8IWY8	Zinc finger and SCAN domain-containing protein 29 OS=Homo sapiens GN=ZSCAN29 PE=1 SV=2	1.76056	1	1	0	0	852	96.659	6.99	14.88	1
Q9GZR7	ATP-dependent RNA helicase DDX24 OS=Homo sapiens GN=DDX24 PE=1 SV=1	1.39697	1	2	1	1	859	96.271	9.06	14.87	1
Q8IZ26	Zinc finger protein 34 OS=Homo sapiens GN=ZNF34 PE=1 SV=3	5.17857	2	2	2	1	560	63.998	8.78	14.81	2
O15523	ATP-dependent RNA helicase DDX3Y OS=Homo sapiens GN=DDX3Y PE=1 SV=2	1.21212	1	1	1	1	660	73.108	7.55	14.67	1
O00571	ATP-dependent RNA helicase DDX3X OS=Homo sapiens GN=DDX3X PE=1 SV=3	1.20846	1	1	1	1	662	73.198	7.18	14.67	1
Q9NZL9	Methionine adenosyltransferase 2 subunit beta OS=Homo sapiens GN=MAT2B PE=1 SV=1	3.59281	1	1	1	1	334	37.528	7.36	14.66	1
P62266	40S ribosomal protein S23 OS=Homo sapiens GN=RPS23 PE=1 SV=3	7.69231	1	2	1	1	143	15.798	10.49	14.45	1
Q8WZ42	Titin OS=Homo sapiens GN=TTN PE=1 SV=4	0.0203785	1	30	1	1	34350	3813.65	6.35	14.4	1
Q9UPE1	SRSF protein kinase 3 OS=Homo sapiens GN=SRPK3 PE=1 SV=2	1.5873	1	1	1	1	567	61.975	7.25	14.39	1
P78362	SRSF protein kinase 2 OS=Homo sapiens GN=SRPK2 PE=1 SV=3	1.30814	1	1	1	1	688	77.478	4.97	14.39	1
P52736	Zinc finger protein 133 OS=Homo sapiens GN=ZNF133 PE=1 SV=2	1.52905	1	1	1	1	654	73.341	8.97	14.37	1
Q9Y5F7	Protocadherin gamma-C4 OS=Homo sapiens GN=PCDHGC4 PE=2 SV=1	1.59915	1	1	1	1	938	101.151	5.35	14	1
P07339	Cathepsin D OS=Homo sapiens GN=CTSD PE=1 SV=1	4.12621	1	1	1	1	412	44.524	6.54	13.99	1
Q96S94	Cyclin-L2 OS=Homo sapiens GN=CCNL2 PE=1 SV=1	1.73077	1	1	1	1	520	58.111	10.26	13.95	1
Q9H000	Probable E3 ubiquitin-protein ligase makorin-2 OS=Homo sapiens GN=MKRN2 PE=1 SV=2	2.88462	1	1	1	1	416	46.909	7.61	13.91	1
P53675	Clathrin heavy chain 2 OS=Homo sapiens GN=CLTCL1 PE=1 SV=2	0.487805	1	1	1	1	1640	186.91	5.85	13.74	1
Q00610	Clathrin heavy chain 1 OS=Homo sapiens GN=CLTC PE=1 SV=5	0.477612	1	1	1	1	1675	191.493	5.69	13.74	1
Q13615	Myotubularin-related protein 3 OS=Homo sapiens GN=MTMR3 PE=1 SV=3	1.08514	1	1	1	1	1198	133.534	5.8	13.58	1
Q9Y2L1	Exosome complex exonuclease RRP44 OS=Homo sapiens GN=DIS3 PE=1 SV=2	1.04384	1	1	1	1	958	108.934	7.14	13.55	1
O15027	Protein transport protein Sec16A OS=Homo sapiens GN=SEC16A PE=1 SV=3	0.504819	1	1	1	1	2179	233.373	5.63	13.41	1
P62857	40S ribosomal protein S28 OS=Homo sapiens GN=RPS28 PE=1 SV=1	13.0435	1	1	1	1	69	7.836	10.7	0	1
Q9HCY8	Protein S100-A14 OS=Homo sapiens GN=S100A14 PE=1 SV=1	10.5769	1	1	1	1	104	11.655	5.24	0	1
Q9NRX4	14 kDa phosphohistidine phosphatase OS=Homo sapiens GN=PHPT1 PE=1 SV=1	8.8	1	1	1	1	125	13.824	6.07	0	1
P42766	60S ribosomal protein L35 OS=Homo sapiens GN=RPL35 PE=1 SV=2	8.13008	1	1	1	1	123	14.543	11.05	0	1
P35080	Profilin-2 OS=Homo sapiens GN=PFN2 PE=1 SV=3	10	1	1	1	1	140	15.036	6.99	0	1
P61077	Ubiquitin-conjugating enzyme E2 D3 OS=Homo sapiens GN=UBE2D3 PE=1 SV=1	7.48299	1	1	1	1	147	16.676	7.8	0	1
P62837	Ubiquitin-conjugating enzyme E2 D2 OS=Homo sapiens GN=UBE2D2 PE=1 SV=1	7.48299	1	1	1	1	147	16.724	7.83	0	1
Q9UNX3	60S ribosomal protein L26-like 1 OS=Homo sapiens GN=RPL26L1 PE=1 SV=1	14.4828	2	2	2	1	145	17.246	10.55	0	2
P61254	60S ribosomal protein L26 OS=Homo sapiens GN=RPL26 PE=1 SV=1	14.4828	2	2	2	1	145	17.248	10.55	0	2
P24666	Low molecular weight phosphotyrosine protein phosphatase OS=Homo sapiens GN=ACP1 PE=1 SV=3	5.6962	1	1	1	1	158	18.031	6.74	0	1
P23528	Cofilin-1 OS=Homo sapiens GN=CFL1 PE=1 SV=3	6.62651	1	1	1	1	166	18.491	8.09	0	1
Q9Y281	Cofilin-2 OS=Homo sapiens GN=CFL2 PE=1 SV=1	6.62651	1	1	1	1	166	18.725	7.88	0	1
O60232	Sjoegren syndrome/scleroderma autoantigen 1 OS=Homo sapiens GN=SSSCA1 PE=1 SV=1	4.0201	1	1	1	1	199	21.461	5.24	0	1
P26583	High mobility group protein B2 OS=Homo sapiens GN=HMGB2 PE=1 SV=2	6.2201	1	1	1	1	209	24.019	7.81	0	1
P30041	Peroxiredoxin-6 OS=Homo sapiens GN=PRDX6 PE=1 SV=3	4.46429	1	1	1	1	224	25.019	6.38	0	1
Q96CF2	Charged multivesicular body protein 4c OS=Homo sapiens GN=CHMP4C PE=1 SV=1	3.00429	1	1	1	1	233	26.394	6.07	0	1
P31947	14-3-3 protein sigma OS=Homo sapiens GN=SFN PE=1 SV=1	3.22581	1	1	0	2	248	27.757	4.74	0	1
O14818	Proteasome subunit alpha type-7 OS=Homo sapiens GN=PSMA7 PE=1 SV=1	3.22581	1	1	1	1	248	27.87	8.46	0	1
Q04917	14-3-3 protein eta OS=Homo sapiens GN=YWHAH PE=1 SV=4	3.25203	1	1	0	2	246	28.201	4.84	0	1
P62701	40S ribosomal protein S4, X isoform OS=Homo sapiens GN=RPS4X PE=1 SV=2	3.80228	1	1	1	1	263	29.579	10.15	0	1
P29692	Elongation factor 1-delta OS=Homo sapiens GN=EEF1D PE=1 SV=5	4.27046	1	1	1	1	281	31.103	5.01	0	1
Q13643	Four and a half LIM domains protein 3 OS=Homo sapiens GN=FHL3 PE=1 SV=4	5	2	2	2	1	280	31.171	6.2	0	2
Q9BY42	Protein RTF2 homolog OS=Homo sapiens GN=RTFDC1 PE=1 SV=3	3.92157	1	1	1	1	306	33.865	8.59	0	1
P60891	Ribose-phosphate pyrophosphokinase 1 OS=Homo sapiens GN=PRPS1 PE=1 SV=2	3.14465	1	1	1	1	318	34.812	6.98	0	1
O95045	Uridine phosphorylase 2 OS=Homo sapiens GN=UPP2 PE=1 SV=1	6.94006	1	1	0	0	317	35.504	6.67	0	1
Q96CX2	BTB/POZ domain-containing protein KCTD12 OS=Homo sapiens GN=KCTD12 PE=1 SV=1	2.15385	1	1	1	1	325	35.679	5.64	0	1
P36873	Serine/threonine-protein phosphatase PP1-gamma catalytic subunit OS=Homo sapiens GN=PPP1CC PE=1 SV=1	4.33437	1	1	1	1	323	36.96	6.54	0	1
P62140	Serine/threonine-protein phosphatase PP1-beta catalytic subunit OS=Homo sapiens GN=PPP1CB PE=1 SV=3	4.28135	1	1	1	1	327	37.163	6.19	0	1
P62136	Serine/threonine-protein phosphatase PP1-alpha catalytic subunit OS=Homo sapiens GN=PPP1CA PE=1 SV=1	4.24242	1	1	1	1	330	37.488	6.33	0	1
Q9Y274	Type 2 lactosamine alpha-2,3-sialyltransferase OS=Homo sapiens GN=ST3GAL6 PE=1 SV=1	4.22961	1	1	1	1	331	38.189	9	0	1
Q8WZA6	Olfactory receptor 1E3 OS=Homo sapiens GN=OR1E3 PE=3 SV=2	13.4111	1	1	1	1	343	38.492	8.51	0	1
Q9Y247	Protein FAM50B OS=Homo sapiens GN=FAM50B PE=1 SV=1	4	1	1	1	1	325	38.685	8.87	0	1
Q9UN81	LINE-1 retrotransposable element ORF1 protein OS=Homo sapiens GN=L1RE1 PE=1 SV=1	3.25444	1	1	1	1	338	40.031	9.51	0	1
Q14320	Protein FAM50A OS=Homo sapiens GN=FAM50A PE=1 SV=2	3.83481	1	1	1	1	339	40.216	6.83	0	1
Q9Y617	Phosphoserine aminotransferase OS=Homo sapiens GN=PSAT1 PE=1 SV=2	2.7027	1	1	1	1	370	40.397	7.66	0	1
Q6DD87	Zinc finger protein 787 OS=Homo sapiens GN=ZNF787 PE=1 SV=3	3.91645	1	1	1	1	383	40.518	7.84	0	1
P46091	G-protein coupled receptor 1 OS=Homo sapiens GN=GPR1 PE=1 SV=2	1.97183	1	1	1	1	355	41.404	7.4	0	1
Q15019	Septin-2 OS=Homo sapiens GN=SEPT2 PE=1 SV=1	2.77008	1	1	1	1	361	41.461	6.6	0	1
Q99873	Protein arginine N-methyltransferase 1 OS=Homo sapiens GN=PRMT1 PE=1 SV=2	2.21607	1	1	1	1	361	41.489	5.43	0	1
Q9NR56	Muscleblind-like protein 1 OS=Homo sapiens GN=MBNL1 PE=1 SV=2	2.06186	1	1	1	1	388	41.79	8.9	0	1
Q9BT81	Transcription factor SOX-7 OS=Homo sapiens GN=SOX7 PE=1 SV=1	2.06186	1	1	1	1	388	42.171	6.68	0	1
Q99733	Nucleosome assembly protein 1-like 4 OS=Homo sapiens GN=NAP1L4 PE=1 SV=1	5.33333	2	2	1	1	375	42.797	4.69	0	2
P0CG43	Putative protein FAM157C OS=Homo sapiens GN=FAM157C PE=3 SV=1	8.52713	1	4	1	1	387	43.38	11.19	0	1
Q96I25	Splicing factor 45 OS=Homo sapiens GN=RBM17 PE=1 SV=1	3.99002	1	1	1	1	401	44.934	5.97	0	1
Q9NR22	Protein arginine N-methyltransferase 8 OS=Homo sapiens GN=PRMT8 PE=1 SV=2	2.03046	1	1	1	1	394	45.262	6.93	0	1
Q6PEW1	Zinc finger CCHC domain-containing protein 12 OS=Homo sapiens GN=ZCCHC12 PE=1 SV=2	1.74129	1	7	1	1	402	45.341	6.18	0	1
O14874	[3-methyl-2-oxobutanoate dehydrogenase [lipoamide]] kinase, mitochondrial OS=Homo sapiens GN=BCKDK PE=1 SV=2	2.18447	1	1	1	1	412	46.331	8.82	0	1
Q09028	Histone-binding protein RBBP4 OS=Homo sapiens GN=RBBP4 PE=1 SV=3	1.88235	1	1	1	1	425	47.626	4.89	0	1
Q16576	Histone-binding protein RBBP7 OS=Homo sapiens GN=RBBP7 PE=1 SV=1	1.88235	1	1	1	1	425	47.79	5.05	0	1
Q15915	Zinc finger protein ZIC 1 OS=Homo sapiens GN=ZIC1 PE=1 SV=2	3.13199	1	1	0	2	447	48.278	8.44	0	1
Q68DU8	BTB/POZ domain-containing protein KCTD16 OS=Homo sapiens GN=KCTD16 PE=1 SV=1	1.63551	1	1	1	1	428	49.106	8.09	0	1
Q9NVH6	Trimethyllysine dioxygenase, mitochondrial OS=Homo sapiens GN=TMLHE PE=1 SV=1	1.90024	1	1	1	1	421	49.486	7.72	0	1
Q92670	Putative zinc finger protein 75C OS=Homo sapiens GN=ZNF75CP PE=5 SV=2	2.11268	1	1	0	11	426	49.721	8.87	0	1
Q9UKT4	F-box only protein 5 OS=Homo sapiens GN=FBXO5 PE=1 SV=1	1.566	1	1	1	1	447	50.114	8.92	0	1
Q9HAH1	Zinc finger protein 556 OS=Homo sapiens GN=ZNF556 PE=2 SV=1	3.28947	1	1	0	0	456	51.548	9.91	0	1
Q99717	Mothers against decapentaplegic homolog 5 OS=Homo sapiens GN=SMAD5 PE=1 SV=1	1.72043	1	1	1	1	465	52.225	7.71	0	1
Q15797	Mothers against decapentaplegic homolog 1 OS=Homo sapiens GN=SMAD1 PE=1 SV=1	1.72043	1	1	1	1	465	52.226	7.31	0	1
Q9H9V9	JmjC domain-containing protein 4 OS=Homo sapiens GN=JMJD4 PE=1 SV=2	1.51188	1	1	0	0	463	52.46	6.21	0	1
Q7L945	Zinc finger protein 627 OS=Homo sapiens GN=ZNF627 PE=1 SV=1	3.2538	1	1	1	1	461	52.819	8.92	0	1
O43790	Keratin, type II cuticular Hb6 OS=Homo sapiens GN=KRT86 PE=1 SV=1	2.88066	2	2	0	0	486	53.466	5.66	0	2
P08670	Vimentin OS=Homo sapiens GN=VIM PE=1 SV=4	1.50215	1	1	0	5	466	53.619	5.12	0	1
P78385	Keratin, type II cuticular Hb3 OS=Homo sapiens GN=KRT83 PE=1 SV=2	2.83976	2	2	0	0	493	54.161	5.64	0	2
Q14533	Keratin, type II cuticular Hb1 OS=Homo sapiens GN=KRT81 PE=1 SV=3	2.77228	2	2	0	0	505	54.893	5.47	0	2
Q9BR11	Zinc finger SWIM domain-containing protein 1 OS=Homo sapiens GN=ZSWIM1 PE=2 SV=2	8.65979	1	3	1	1	485	55.035	7.42	0	1
Q14938	Nuclear factor 1 X-type OS=Homo sapiens GN=NFIX PE=1 SV=2	2.78884	1	1	1	1	502	55.064	8.68	0	1
Q16670	Zinc finger and SCAN domain-containing protein 26 OS=Homo sapiens GN=ZSCAN26 PE=1 SV=2	1.88285	1	1	0	11	478	55.219	8.06	0	1
P78386	Keratin, type II cuticular Hb5 OS=Homo sapiens GN=KRT85 PE=1 SV=1	1.38067	1	1	0	5	507	55.766	6.55	0	1
Q14119	Vascular endothelial zinc finger 1 OS=Homo sapiens GN=VEZF1 PE=1 SV=2	1.34357	1	1	1	1	521	56.895	9.52	0	1
Q99457	Nucleosome assembly protein 1-like 3 OS=Homo sapiens GN=NAP1L3 PE=2 SV=2	2.56917	1	2	1	1	506	57.557	5.08	0	1
Q9UKT9	Zinc finger protein Aiolos OS=Homo sapiens GN=IKZF3 PE=1 SV=2	1.76817	1	1	0	11	509	57.986	6.55	0	1
P40227	T-complex protein 1 subunit zeta OS=Homo sapiens GN=CCT6A PE=1 SV=3	1.88324	1	1	1	1	531	57.988	6.68	0	1
Q9UBE8	Serine/threonine-protein kinase NLK OS=Homo sapiens GN=NLK PE=1 SV=2	1.70778	1	1	1	1	527	58.246	8.13	0	1
Q12874	Splicing factor 3A subunit 3 OS=Homo sapiens GN=SF3A3 PE=1 SV=1	1.79641	1	1	1	1	501	58.812	5.38	0	1
P13682	Zinc finger protein 35 OS=Homo sapiens GN=ZNF35 PE=2 SV=4	2.8463	1	1	1	1	527	59.051	8.09	0	1
P51815	Zinc finger protein 75D OS=Homo sapiens GN=ZNF75D PE=2 SV=2	1.76471	1	1	0	11	510	59.26	9.22	0	1
Q9Y5Q8	General transcription factor 3C polypeptide 5 OS=Homo sapiens GN=GTF3C5 PE=1 SV=2	1.54143	1	1	1	1	519	59.533	6.9	0	1
P51522	Zinc finger protein 83 OS=Homo sapiens GN=ZNF83 PE=2 SV=3	1.74419	1	1	0	11	516	59.671	9.22	0	1
Q9GZX5	Zinc finger protein 350 OS=Homo sapiens GN=ZNF350 PE=1 SV=3	2.81955	1	1	0	2	532	59.973	8.62	0	1
Q8ND83	SLAIN motif-containing protein 1 OS=Homo sapiens GN=SLAIN1 PE=1 SV=3	1.23239	1	1	1	1	568	60.557	7.64	0	1
Q68DY1	Zinc finger protein 626 OS=Homo sapiens GN=ZNF626 PE=2 SV=2	3.78788	1	1	0	10	528	60.853	9.1	0	1
Q9P255	Zinc finger protein 492 OS=Homo sapiens GN=ZNF492 PE=2 SV=2	1.88324	1	1	0	10	531	61.118	9.25	0	1
Q5SXM1	Zinc finger protein 678 OS=Homo sapiens GN=ZNF678 PE=2 SV=1	2.09524	1	1	1	1	525	61.371	9.17	0	1
P17024	Zinc finger protein 20 OS=Homo sapiens GN=ZNF20 PE=1 SV=2	1.50376	1	1	1	1	532	61.527	8.62	0	1
Q8NEM1	Zinc finger protein 680 OS=Homo sapiens GN=ZNF680 PE=2 SV=2	1.69811	1	1	0	11	530	61.758	8.97	0	1
Q8IWB1	Inositol 1,4,5-trisphosphate receptor-interacting protein OS=Homo sapiens GN=ITPRIP PE=1 SV=1	1.27971	1	1	0	0	547	62.019	5.88	0	1
Q14584	Zinc finger protein 266 OS=Homo sapiens GN=ZNF266 PE=1 SV=2	2.73224	1	1	1	1	549	62.076	8.59	0	1
P52737	Zinc finger protein 136 OS=Homo sapiens GN=ZNF136 PE=1 SV=1	1.66667	1	1	0	11	540	62.742	9.13	0	1
Q9BRG2	SH2 domain-containing protein 3A OS=Homo sapiens GN=SH2D3A PE=1 SV=1	1.5625	1	1	1	1	576	63.054	7.42	0	1
Q96SR6	Zinc finger protein 382 OS=Homo sapiens GN=ZNF382 PE=2 SV=3	2.72727	1	1	0	2	550	63.968	9.31	0	1
B4DU55	Zinc finger protein 879 OS=Homo sapiens GN=ZNF879 PE=2 SV=2	2.30906	1	1	0	0	563	64.536	9.54	0	1
O95935	T-box transcription factor TBX18 OS=Homo sapiens GN=TBX18 PE=1 SV=3	1.15321	1	1	0	0	607	64.712	8.78	0	1
Q8NDW4	Zinc finger protein 248 OS=Homo sapiens GN=ZNF248 PE=2 SV=1	5.18135	1	1	1	1	579	67.043	8.25	0	1
Q9BWM5	Zinc finger protein 416 OS=Homo sapiens GN=ZNF416 PE=2 SV=1	2.52525	1	1	1	1	594	67.144	7.97	0	1
Q8N7Q3	Zinc finger protein 676 OS=Homo sapiens GN=ZNF676 PE=2 SV=2	5.10204	1	1	0	10	588	67.58	8.87	0	1
Q96N58	Zinc finger protein 578 OS=Homo sapiens GN=ZNF578 PE=2 SV=2	1.69492	1	1	0	10	590	68.486	8.95	0	1
Q6PF04	Zinc finger protein 613 OS=Homo sapiens GN=ZNF613 PE=2 SV=2	2.43112	1	1	0	2	617	70.099	8.92	0	1
Q15025	TNFAIP3-interacting protein 1 OS=Homo sapiens GN=TNIP1 PE=1 SV=2	1.88679	1	1	1	1	636	71.82	6.62	0	1
P42357	Histidine ammonia-lyase OS=Homo sapiens GN=HAL PE=1 SV=1	1.67428	1	1	1	1	657	72.652	6.95	0	1
Q9HBE1	POZ-, AT hook-, and zinc finger-containing protein 1 OS=Homo sapiens GN=PATZ1 PE=1 SV=1	1.01892	1	1	1	1	687	74.013	8.35	0	1
Q96PZ0	Pseudouridylate synthase 7 homolog OS=Homo sapiens GN=PUS7 PE=1 SV=2	2.118	1	1	1	1	661	74.988	6.37	0	1
Q6ZR52	Zinc finger protein 493 OS=Homo sapiens GN=ZNF493 PE=2 SV=3	1.54799	1	1	0	10	646	75.293	9.31	0	1
Q9BRH9	Zinc finger protein 251 OS=Homo sapiens GN=ZNF251 PE=2 SV=4	1.49031	1	1	0	10	671	75.716	9.17	0	1
Q8N7K0	Zinc finger protein 433 OS=Homo sapiens GN=ZNF433 PE=1 SV=1	4.45765	1	1	0	0	673	77.192	9.2	0	1
Q7Z340	Zinc finger protein 551 OS=Homo sapiens GN=ZNF551 PE=1 SV=3	1.9403	1	1	1	1	670	77.465	8.35	0	1
Q92997	Segment polarity protein dishevelled homolog DVL-3 OS=Homo sapiens GN=DVL3 PE=1 SV=2	1.81564	1	1	1	1	716	78.006	6.65	0	1
Q9Y2H8	Zinc finger protein 510 OS=Homo sapiens GN=ZNF510 PE=2 SV=1	1.31772	1	1	0	11	683	79.092	8.97	0	1
Q8N8Z8	Zinc finger protein 441 OS=Homo sapiens GN=ZNF441 PE=2 SV=2	2.1645	1	1	0	0	693	80.083	8.46	0	1
Q6ZMW2	Zinc finger protein 782 OS=Homo sapiens GN=ZNF782 PE=2 SV=1	2.14592	1	1	0	0	699	80.852	9.01	0	1
Q5XG87	Non-canonical poly(A) RNA polymerase PAPD7 OS=Homo sapiens GN=PAPD7 PE=1 SV=3	1.1658	1	1	1	1	772	82.309	9.52	0	1
Q92499	ATP-dependent RNA helicase DDX1 OS=Homo sapiens GN=DDX1 PE=1 SV=2	1.75676	1	1	1	1	740	82.38	7.23	0	1
Q9UK10	Zinc finger protein 225 OS=Homo sapiens GN=ZNF225 PE=2 SV=2	2.54958	1	1	0	11	706	82.418	8.91	0	1
Q9UFB7	Zinc finger and BTB domain-containing protein 47 OS=Homo sapiens GN=ZBTB47 PE=2 SV=3	1.07095	1	1	1	1	747	82.708	5.76	0	1
P51523	Zinc finger protein 84 OS=Homo sapiens GN=ZNF84 PE=1 SV=2	3.25203	2	2	2	1	738	85.403	8.78	0	2
Q08J23	tRNA (cytosine(34)-C(5))-methyltransferase OS=Homo sapiens GN=NSUN2 PE=1 SV=2	2.08605	1	1	1	1	767	86.416	6.77	0	1
P25440	Bromodomain-containing protein 2 OS=Homo sapiens GN=BRD2 PE=1 SV=2	0.998752	1	1	1	1	801	88.006	9.09	0	1
Q06732	Zinc finger protein 33B OS=Homo sapiens GN=ZNF33B PE=1 SV=2	1.92802	1	1	0	0	778	90.624	8.25	0	1
Q8N608	Inactive dipeptidyl peptidase 10 OS=Homo sapiens GN=DPP10 PE=1 SV=2	0.879397	1	1	1	1	796	90.83	6.57	0	1
P48995	Short transient receptor potential channel 1 OS=Homo sapiens GN=TRPC1 PE=1 SV=1	0.882724	1	1	1	1	793	91.153	8.05	0	1
Q2NL82	Pre-rRNA-processing protein TSR1 homolog OS=Homo sapiens GN=TSR1 PE=1 SV=1	1.61692	1	1	1	1	804	91.752	7.42	0	1
Q06730	Zinc finger protein 33A OS=Homo sapiens GN=ZNF33A PE=1 SV=3	2.96296	2	2	1	0	810	94.323	8.07	0	2
Q8IY81	pre-rRNA processing protein FTSJ3 OS=Homo sapiens GN=FTSJ3 PE=1 SV=2	1.65289	1	1	1	1	847	96.499	8.4	0	1
Q9NTZ6	RNA-binding protein 12 OS=Homo sapiens GN=RBM12 PE=1 SV=1	1.07296	1	1	1	1	932	97.333	8.63	0	1
Q13435	Splicing factor 3B subunit 2 OS=Homo sapiens GN=SF3B2 PE=1 SV=2	3.01676	2	2	2	1	895	100.165	5.67	0	2
Q8TE49	OTU domain-containing protein 7A OS=Homo sapiens GN=OTUD7A PE=1 SV=1	0.75594	1	1	0	0	926	100.614	8.4	0	1
P52824	Diacylglycerol kinase theta OS=Homo sapiens GN=DGKQ PE=1 SV=2	1.27389	1	1	1	1	942	101.09	7.49	0	1
Q8N4W9	Zinc finger protein 808 OS=Homo sapiens GN=ZNF808 PE=2 SV=2	1.10742	1	1	0	10	903	104.757	9.48	0	1
O43707	Alpha-actinin-4 OS=Homo sapiens GN=ACTN4 PE=1 SV=2	1.20746	1	1	1	1	911	104.788	5.44	0	1
Q9NXF1	Testis-expressed sequence 10 protein OS=Homo sapiens GN=TEX10 PE=1 SV=2	1.39935	1	1	1	1	929	105.608	9.36	0	1
O00408	cGMP-dependent 3',5'-cyclic phosphodiesterase OS=Homo sapiens GN=PDE2A PE=1 SV=1	2.65675	1	3	1	1	941	105.649	5.41	0	1
Q9H270	Vacuolar protein sorting-associated protein 11 homolog OS=Homo sapiens GN=VPS11 PE=1 SV=1	1.38151	1	1	0	0	941	107.768	7.05	0	1
Q58F21	Bromodomain testis-specific protein OS=Homo sapiens GN=BRDT PE=1 SV=4	0.844773	1	1	0	0	947	107.887	8.95	0	1
Q15029	116 kDa U5 small nuclear ribonucleoprotein component OS=Homo sapiens GN=EFTUD2 PE=1 SV=1	1.02881	1	1	1	1	972	109.366	5	0	1
Q63HK3	Zinc finger protein with KRAB and SCAN domains 2 OS=Homo sapiens GN=ZKSCAN2 PE=1 SV=2	4.03309	3	3	0	0	967	110.87	8.35	0	3
A6QL63	Ankyrin repeat and BTB/POZ domain-containing protein BTBD11 OS=Homo sapiens GN=BTBD11 PE=2 SV=3	1.72101	1	1	1	1	1104	120.807	6.83	0	1
Q03701	CCAAT/enhancer-binding protein zeta OS=Homo sapiens GN=CEBPZ PE=1 SV=3	1.04364	1	1	1	1	1054	120.898	5.94	0	1
Q9NZB2	Constitutive coactivator of PPAR-gamma-like protein 1 OS=Homo sapiens GN=FAM120A PE=1 SV=2	0.715564	1	1	1	1	1118	121.811	8.88	0	1
Q6UXM1	Leucine-rich repeats and immunoglobulin-like domains protein 3 OS=Homo sapiens GN=LRIG3 PE=2 SV=1	2.3235	1	1	1	1	1119	123.355	6.19	0	1
P18206	Vinculin OS=Homo sapiens GN=VCL PE=1 SV=4	1.14638	1	1	1	1	1134	123.722	5.66	0	1
P52333	Tyrosine-protein kinase JAK3 OS=Homo sapiens GN=JAK3 PE=1 SV=2	0.622776	1	1	0	0	1124	125.019	7.18	0	1
Q9NP73	Putative bifunctional UDP-N-acetylglucosamine transferase and deubiquitinase ALG13 OS=Homo sapiens GN=ALG13 PE=1 SV=2	0.967458	1	1	1	1	1137	125.975	6.74	0	1
Q14671	Pumilio homolog 1 OS=Homo sapiens GN=PUM1 PE=1 SV=3	2.02361	2	2	2	1	1186	126.395	6.84	0	2
O60674	Tyrosine-protein kinase JAK2 OS=Homo sapiens GN=JAK2 PE=1 SV=2	0.618375	1	1	0	0	1132	130.59	7.21	0	1
Q9Y4H2	Insulin receptor substrate 2 OS=Homo sapiens GN=IRS2 PE=1 SV=2	0.747384	1	1	1	1	1338	137.249	8.65	0	1
Q92610	Zinc finger protein 592 OS=Homo sapiens GN=ZNF592 PE=1 SV=2	1.02605	1	1	1	1	1267	137.441	7.84	0	1
Q14683	Structural maintenance of chromosomes protein 1A OS=Homo sapiens GN=SMC1A PE=1 SV=2	1.21655	1	1	1	1	1233	143.144	7.64	0	1
Q1MSJ5	Centrosome and spindle pole-associated protein 1 OS=Homo sapiens GN=CSPP1 PE=1 SV=4	0.875796	1	1	1	1	1256	145.433	6.8	0	1
P54132	Bloom syndrome protein OS=Homo sapiens GN=BLM PE=1 SV=1	0.635145	1	1	0	0	1417	158.901	7.49	0	1
Q8WWZ4	ATP-binding cassette sub-family A member 10 OS=Homo sapiens GN=ABCA10 PE=2 SV=3	1.23137	1	4	1	1	1543	175.676	6.65	0	1
Q9UGU0	Transcription factor 20 OS=Homo sapiens GN=TCF20 PE=1 SV=3	0.561224	1	1	1	1	1960	211.641	9.04	0	1
Q92817	Envoplakin OS=Homo sapiens GN=EVPL PE=1 SV=3	0.344319	1	1	0	0	2033	231.463	6.96	0	1
Q9C0G0	Zinc finger protein 407 OS=Homo sapiens GN=ZNF407 PE=1 SV=2	0.400356	1	1	0	11	2248	247.211	6.49	0	1
O15021	Microtubule-associated serine/threonine-protein kinase 4 OS=Homo sapiens GN=MAST4 PE=1 SV=3	0.53313	1	1	1	1	2626	284.202	8.62	0	1
Q02224	Centromere-associated protein E OS=Homo sapiens GN=CENPE PE=1 SV=2	0.259163	1	1	0	0	2701	316.219	5.64	0	1
Q7Z6Z7	E3 ubiquitin-protein ligase HUWE1 OS=Homo sapiens GN=HUWE1 PE=1 SV=3	0.297211	1	1	1	1	4374	481.589	5.22	0	1
Q15149	Plectin OS=Homo sapiens GN=PLEC PE=1 SV=3	0.405636	1	1	1	1	4684	531.466	5.96	0	1

## Sheet: NleE WT-K219Azi(3)
Protein IDs	Majority protein IDs	Protein names	Gene names	Number of proteins	Peptides	Razor + unique peptides	Unique peptides	Sequence coverage [%]	Mol. weight [kDa]	Sequence length	Score	Sequence coverage NleE K219Azi [%]	Sequence coverage NleE WT [%]	Intensity	Intensity NleE K219Azi	Intensity NleE WT
A0A024R4F1;P06733;E2DRY6;K7EM90;A4QMW8;A4UCS8	A0A024R4F1;P06733;E2DRY6	Alpha-enolase;Enolase	ENO1	6	9	9	8	35.9	47.168	434	120.52	0	35.9	239010000	0	239010000
A0A024RAA7;P02747	A0A024RAA7;P02747	Complement C1q subcomponent subunit C	C1QC	2	1	1	1	5.3	25.773	245	6.7276	5.3	0	7763500	7763500	0
A0A068LN13;B1N7B6;Q0ZCI9;G1FM93;G1FM92;G1FM85	A0A068LN13;B1N7B6;Q0ZCI9;G1FM93;G1FM92;G1FM85			6	1	1	1	13.6	13.285	118	7.2484	13.6	0	2726200	2726200	0
A0A075B730;P58107	A0A075B730;P58107	Epiplakin	EPPK1	2	2	2	2	5.7	553.12	5063	16.034	0	5.7	58176000	0	58176000
A0A087WT58	A0A087WT58		MROH2A	1	1	1	1	0.8	191.21	1688	6.6399	0.8	0	253140000	253140000	0
A0A087WWU8;B2RDE1;A0A0S2Z4I4;A0A0S2Z4G8;A0A0S2Z4G4;J3KN67;M1VPF4;P06753;K7EP68;K7ERG3;K7ENT6;Q5HYB6;V9HW56;P67936;D6R904;H0YKP3;B4DGC2;B4DVY2;V9HW25;Q5TCU3;A7XZE4;Q5TCU8;P07951;Q5VU61;Q8NAH0;B4DTK3;B4DTB1;Q5VU62;B4DQ80;Q8NAG3;B4DWT5;B4E3P1;Q6LDX7;K7EPV9;K7EMU5	A0A087WWU8;B2RDE1;A0A0S2Z4I4;A0A0S2Z4G8;A0A0S2Z4G4;J3KN67;M1VPF4;P06753;K7EP68;K7ERG3;K7ENT6;Q5HYB6;V9HW56;P67936;D6R904;H0YKP3;B4DGC2;B4DVY2;V9HW25;Q5TCU3;A7XZE4;Q5TCU8;P07951;Q5VU61;Q8NAH0;B4DTK3	Tyrosine-protein kinase receptor;Tropomyosin alpha-3 chain;Tropomyosin alpha-4 chain;Tropomyosin beta chain	TPM3;TPM3-ROS1;TPM4;DKFZp686J1372;HEL-S-108;TPM1;HEL-S-273;TPM2;TPM2b;HEL-S-82p	35	10	3	3	26.9	26.42	227	65.002	26.9	4.4	189740000	178950000	0
A0A087WXZ6;A0A0A0MRM3;Q92637;P12314	A0A087WXZ6;A0A0A0MRM3;Q92637;P12314	High affinity immunoglobulin gamma Fc receptor IB;High affinity immunoglobulin gamma Fc receptor I	FCGR1B;FCGR1A	4	1	1	1	2.8	28.809	249	11.992	2.8	0	65943000	65943000	0
A0A087X1N7;P20929;Q14918;H7BZD5;Q9Y5Z1;Q14214;Q14215;H0Y786	A0A087X1N7;P20929;Q14918;H7BZD5;Q9Y5Z1;Q14214;Q14215;H0Y786	Nebulin	NEB	8	2	2	1	0.7	990.84	8560	11.757	0.7	0	7140000	7140000	0
A0A0A0MRQ5;A0A0A0MSI0;B4DF70;V9HW12;B2R4P2;P32119;Q06830	A0A0A0MRQ5;A0A0A0MSI0;B4DF70;V9HW12;B2R4P2;P32119;Q06830	Peroxiredoxin-2;Peroxiredoxin-1	PRDX1;HEL-S-2a;PRDX2	7	1	1	1	11.3	10.676	97	6.3346	0	11.3	20068000	0	20068000
A0A0K0KRH8	A0A0K0KRH8			1	1	1	1	6.6	21.032	181	7.2483	6.6	0	63107000	63107000	0
A0A0S2Z487;A0A024R1X8;P14923;A0A0S2Z495	A0A0S2Z487;A0A024R1X8;P14923;A0A0S2Z495	Junction plakoglobin	JUP	4	4	2	2	6.4	81.744	745	12.67	0	6.4	17127000	0	17127000
A0A125QYY5;P01594;P01593	A0A125QYY5;P01594;P01593	Ig kappa chain V-I region AU;Ig kappa chain V-I region AG		3	1	1	1	15	11.61	107	6.7134	15	0	5916000	5916000	0
A0A125U0U7;A0A120HF66;A0A125QYY9	A0A125U0U7;A0A120HF66;A0A125QYY9			3	1	1	1	13.6	13.096	118	8.145	13.6	0	6044400	6044400	0
A0A1B0GVI3	A0A1B0GVI3			1	2	2	2	19.6	10.03	107	11.426	0	19.6	28538000	0	28538000
A0A1W6IYJ1;Q9UL88;A0A193CHR0;A0A193CHQ9	A0A1W6IYJ1;Q9UL88;A0A193CHR0;A0A193CHQ9			4	1	1	1	15.3	13.921	124	9.8418	15.3	0	47672000	47672000	0
A0A1W6IYJ6;A0A1W6IYI5	A0A1W6IYJ6;A0A1W6IYI5			2	1	1	1	15.3	13.485	124	5.9815	15.3	0	6870400	6870400	0
A0A286YES1;Q8NF17;Q6N030;Q5EBM2;P01860;Q86TT2;O95978	A0A286YES1;Q8NF17;Q6N030;Q5EBM2;P01860;Q86TT2	Ig gamma-3 chain C region	FLJ00385;DKFZp686I15212;IGHG3	7	12	5	4	34.8	49.021	446	113.93	34.8	0	359220000	359220000	0
A0A286YFJ8;P01861;S6BGF5	A0A286YFJ8;P01861	Ig gamma-4 chain C region	IGHG4	3	8	1	0	25.5	43.831	396	10.37	25.5	0	84844000	84844000	0
A0JNT2;P78385;A0A087X106;B4DN72;A8K872;A6NCN2;O43790;Q14533;P78386	A0JNT2;P78385;A0A087X106;B4DN72;A8K872;A6NCN2;O43790;Q14533;P78386	Keratin, type II cuticular Hb3;Putative keratin-87 protein;Keratin, type II cuticular Hb6;Keratin, type II cuticular Hb1;Keratin, type II cuticular Hb5	KRT83;KRT81;KRT87P;KRT86;KRT85	9	3	2	2	5.6	49.641	447	43.687	5.6	1.6	26261000	26261000	0
A0M8Q9;Q8TCJ5;P0DOY3;P0DOY2;Q6PJR7;A0A0B4J231;P0DOX8;Q8N5F4;Q6GMW4;Q8N355;Q7Z2U7;Q6NS95;Q6GMW3;Q6GMV8;Q5CZ94;S6BGD6;Q6PJG0;Q6PIK1;Q6P2J1;Q6IN99;Q6GMW6;Q567P1;A2NUT2;A0A5E4;Q96E61;Q8NEJ1;Q6PIQ7;Q6P5S3;Q6IPQ0;Q6GMX4;Q6GMX3;Q6GMV7;Q6DHW4;P0CG04;P0CF74;B9A064;S6C4R7;S6BGF9;S6B286;S6AWE6;S6BAR0;S6BAN6;S6C4S2;S6BAP8;S6B2B0;Q5FWF9;A0M8Q6	A0M8Q9;Q8TCJ5;P0DOY3;P0DOY2;Q6PJR7;A0A0B4J231;P0DOX8;Q8N5F4;Q6GMW4;Q8N355;Q7Z2U7;Q6NS95;Q6GMW3;Q6GMV8;Q5CZ94;S6BGD6;Q6PJG0;Q6PIK1;Q6P2J1;Q6IN99;Q6GMW6;Q567P1;A2NUT2;A0A5E4;Q96E61;Q8NEJ1;Q6PIQ7;Q6P5S3;Q6IPQ0;Q6GMX4;Q6GMX3;Q6GMV7;Q6DHW4;P0CG04;P0CF74;B9A064;S6C4R7;S6BGF9;S6B286;S6AWE6;S6BAR0;S6BAN6;S6C4S2;S6BAP8;S6B2B0;Q5FWF9;A0M8Q6	Beta-2-microglobulin;Ig lambda-1 chain C regions;Ig lambda-6 chain C region;Immunoglobulin lambda-like polypeptide 5;Ig lambda-7 chain C region	C1 segment;DKFZp667J0810;IGL@;IGLL5;DKFZp781M0386;IGLC1;IGLC6;IGLC7	47	2	2	2	28.6	11.29	105	14.656	28.6	0	514400000	514400000	0
A2J1M4;A2J1M2;A0A125QYY4;A0A068LL60;A0A109PS45;A0A109PW50;A0A125U0U9;A0A109PT03;Q65ZC8	A2J1M4;A2J1M2;A0A125QYY4;A0A068LL60;A0A109PS45;A0A109PW50;A0A125U0U9;A0A109PT03;Q65ZC8		scFv	9	1	1	1	12.2	10.912	98	6.386	12.2	0	2590300	2590300	0
A2JA19;A0A109PW65;A0A0C4DH67;A0A0C4DH69	A2JA19;A0A109PW65;A0A0C4DH67;A0A0C4DH69		IGKV1-8;IGKV1-9	4	1	1	1	17.8	11.658	107	5.9299	17.8	0	6622400	6622400	0
A2KUC3;A0A1L2BU33;A2KBC1;A2KBC8;A2KBC7;A2KBC6;A2KBC5;A2KBC4;A2KBC3;A2KBC2;A2KBC0;A2KBB9	A2KUC3;A0A1L2BU33;A2KBC1;A2KBC8;A2KBC7;A2KBC6;A2KBC5;A2KBC4;A2KBC3;A2KBC2;A2KBC0;A2KBB9		IGHV	12	1	1	1	15.7	13.059	121	11.773	15.7	0	54650000	54650000	0
A2MYD4;Q5NV90;A0A1L2BU40	A2MYD4;Q5NV90;A0A1L2BU40		V2-7;V2-17	3	1	1	1	19.8	10.352	96	6.2657	19.8	0	4582600	4582600	0
A3KPE2;B0YIW2;P02656	A3KPE2;B0YIW2;P02656	Apolipoprotein C-III	APOC3	3	1	1	1	16.2	10.852	99	8.145	16.2	0	13964000	13964000	0
A8K2H9;A1A4E9;B4DL17;Q8N1A0;P35900	A8K2H9;A1A4E9;B4DL17		KRT13	5	7	1	1	12.7	49.517	458	-2	4.4	7.2	80689000	0	0
A8MX12;P52179	A8MX12;P52179	Myomesin-1	MYOM1	2	1	1	1	1	162.29	1452	6.6912	1	0	15269000	15269000	0
B1N7B8;A0A0X9TD47;A0N5G5	B1N7B8;A0A0X9TD47;A0N5G5		V<kappa>3	3	1	1	1	16.8	11.796	107	11.509	16.8	0	26757000	26757000	0
B2CIS9;A9UFC0;P31944	B2CIS9;A9UFC0;P31944	Caspase-14;Caspase-14 subunit p17, mature form;Caspase-14 subunit p10, mature form;Caspase-14 subunit p20, intermediate form;Caspase-14 subunit p8, intermediate form	CASP14	3	2	2	2	9.1	27.679	242	12.311	4.5	9.1	23359000	9291400	14068000
B2R4M6;P06702	B2R4M6;P06702	Protein S100;Protein S100-A9	S100A9	2	1	1	1	11.4	13.21	114	6.5891	0	11.4	22821000	0	8826700
B2R8I2;P04196	B2R8I2;P04196	Histidine-rich glycoprotein	HRG	2	1	1	1	2.7	59.512	525	8.8395	2.7	0	9148800	9148800	0
B3KQG6;O95373	B3KQG6;O95373	Importin-7	IPO7	2	1	1	1	1.5	82.515	722	-2	0	0	51354000	0	0
B3KTU7;F2Z2B9;B3KRS1;B4DS45;Q53EQ3;Q9BSJ2	B3KTU7;F2Z2B9;B3KRS1;B4DS45;Q53EQ3;Q9BSJ2	Gamma-tubulin complex component 2	TUBGCP2	6	1	1	1	2	57.183	495	-2	0	2	192450000	0	192450000
B3KVA7;B2R8A3;A0A024RAK5;P17540	B3KVA7;B2R8A3;A0A024RAK5;P17540	Creatine kinase S-type, mitochondrial	CKMT2	4	2	2	2	6.2	40.479	356	18.563	6.2	0	17716000	17716000	0
B4DE59;C9JTX4;C9J826;C9JK18;C9JKY1	B4DE59			5	6	2	0	11.9	62.615	563	12.537	2.8	11.9	27265000	0	27265000
B4DJI1;V9HWB9;P00338	B4DJI1;V9HWB9;P00338	L-lactate dehydrogenase;L-lactate dehydrogenase A chain	HEL-S-133P;LDHA	3	2	2	2	4.6	33.593	305	28.993	4.6	0	186220000	186220000	0
B4DL19;Q5TZZ9;B5BU38;P04083	B4DL19;Q5TZZ9;B5BU38;P04083	Annexin;Annexin A1	ANXA1	4	1	1	1	9.3	19.589	172	17.682	0	0	13932000	0	0
B4DL87;V9HW43;P04792;C9J3N8;F8WE04	B4DL87;V9HW43;P04792	Heat shock protein beta-1	HEL-S-102;HSPB1	5	3	3	3	37.6	18.536	170	24.505	0	37.6	235600000	0	235600000
B4DNE0;Q96RE1;Q9NZS6;A0A087WVQ9;Q6IPT9;Q6IPS9;Q6IPN6;Q53HR5;Q53HQ7;Q53HM9;Q53GE9;Q53G85;A8K9C4;Q5VTE0;P68104;Q14222;Q96C29;Q8TBL1;Q6P082;Q96CD8;Q6P4C9;Q504Z0;B4E2C5;Q8IUB0;Q16577;B4DV42;Q53G89;Q53GA1;A6PW80;Q5JR01;A9X7H1;Q59GP5;Q53HR1;A0A087WV01;Q9H2I7;Q05639	B4DNE0;Q96RE1;Q9NZS6;A0A087WVQ9;Q6IPT9;Q6IPS9;Q6IPN6;Q53HR5;Q53HQ7;Q53HM9;Q53GE9;Q53G85;A8K9C4;Q5VTE0;P68104;Q14222;Q96C29;Q8TBL1;Q6P082;Q96CD8;Q6P4C9;Q504Z0;B4E2C5;Q8IUB0;Q16577;B4DV42;Q53G89;Q53GA1	Elongation factor 1-alpha;Putative elongation factor 1-alpha-like 3;Elongation factor 1-alpha 1	EEF1A1L14;EEF1A1;EEF1A1P5;EEF1A;PTI-1	36	3	3	3	11.9	42.596	395	18.486	2.8	11.9	44116000	13607000	30509000
B4DP37	B4DP37			1	1	1	1	3.6	44.566	394	5.9508	3.6	0	242120000	242120000	0
B4DRR0;A0A0S2Z428;P02538;B4DWU6;B4DRU6;A8K2I0;O95678;F8VUG2;F8W1U3;P05787;A0A0S2Z427;B3KY79;P08729;Q9NSB2;F8VP67;Q969I0;Q14CN4;U3KPR1;H0YHD9;A0A1B0GTT5;B4DIR1;K7ELP4;K7EJU1;F8VS61;K7EKH9;B4DXK4;A0A1X7SCE1;Q147W7;B4E192;B4DJW0;B0YJC4;K7EMP8;V9HWE1;Q53HU8;A0A1X7SBR3;A0A1W2PR46;F8W1S1;Q8IWY7;P14136;P08670;Q7RTS7	B4DRR0;A0A0S2Z428;P02538;B4DWU6;B4DRU6;A8K2I0	Keratin, type II cytoskeletal 6A	KRT6A	41	30	22	1	50.8	57.838	535	323.31	13.1	50.8	4820700000	48730000	4670800000
B4DRV8;B4DQ50	B4DRV8;B4DQ50			2	1	1	1	5.9	21.4	204	7.8465	0	5.9	8860600	0	8860600
B4DRW1;B4DRR7;B4DKJ0;B4DRS2;P19013;Q86Y46;F8VX05;F8VZR6;H0YIC5	B4DRW1;B4DRR7;B4DKJ0;B4DRS2;P19013;Q86Y46	Keratin, type II cytoskeletal 4;Keratin, type II cytoskeletal 73	KRT4;KRT73	9	4	2	2	8.9	51.759	474	66.687	1.9	3.4	248390000	0	0
B4DRW6;B2RB32;A0A0M4FEM1;P11217;B4DRQ4;B4DSD8;E9PK47;B2R825;Q59GM9;P11216;P06737	B4DRW6;B2RB32;A0A0M4FEM1;P11217	Alpha-1,4 glucan phosphorylase;Glycogen phosphorylase, muscle form	PYGM	11	7	7	7	6.2	95.903	832	81.276	6.2	0	435380000	435380000	0
B4E1B2;B4DI57;Q53H26;Q06AH7;A0A0K0K1H8;P02787;A0PJA6;C9JVG0;B4DHZ6;H7C5E8	B4E1B2;B4DI57;Q53H26;Q06AH7;A0A0K0K1H8;P02787;A0PJA6	Serotransferrin	TF	10	6	6	6	11.8	74.831	678	40.761	11.8	0	75357000	75357000	0
B4E1D8;B4E1E1;P04003	B4E1D8;B4E1E1;P04003	C4b-binding protein alpha chain	C4BPA	3	1	1	1	2.2	60.405	536	28.966	2.2	0	19797000	19797000	0
B4E1H9;V9HWF4;P00558;B4DHM5;B4DWQ3;B4DHB3;V9HW85;A0A140VJR3;P07205	B4E1H9;V9HWF4;P00558;B4DHM5	Phosphoglycerate kinase;Phosphoglycerate kinase 1	HEL-S-68p;PGK1	9	3	3	3	15.3	35.045	327	237.62	9.8	5.5	280520000	263650000	16880000
B4E335;B4E3A4;Q8WVW5;Q53GK6;Q53G99;Q53G76;Q1KLZ0;P63261;P60709;B4DVQ0;B4DW52;I3L3I0;I3L1U9;I3L4N8;B3KWQ3;Q6PJ43;B7ZAP6;A1E282;G5E9R0;K7EM38;E7EVS6;I3L3R2;J3KT65;V9HVZ7;C9JTX5;C9JUM1;C9JZR7;F8WB63;B8ZZJ2;A4UCT3;A5GZ75;Q96FU6;Q6S8J3;F1BXA6;Q96DE1;Q562R1;F8WCH0;P0CG38;K4EQ44;K4EP00;K4ENJ5;G8FSY7;A0A173GMX0;Q9UE89;Q562Z7;Q562Z4;Q562Y6;Q562X9;Q562V5;Q562U2;Q562S0;Q562R8;Q562P9;Q562P0;Q562N8;Q562N6;Q56…	B4E335;B4E3A4;Q8WVW5;Q53GK6;Q53G99;Q53G76;Q1KLZ0;P63261;P60709;B4DVQ0;B4DW52;I3L3I0;I3L1U9;I3L4N8;B3KWQ3;Q6PJ43;B7ZAP6	Actin, cytoplasmic 2;Actin, cytoplasmic 2, N-terminally processed;Actin, cytoplasmic 1;Actin, cytoplasmic 1, N-terminally processed	PS1TP5BP1;ACTG1;ACTB	65	13	3	3	38.5	39.226	351	19.804	23.9	27.4	114310000	0	114310000
B7Z553;D9ZGG2;P04004	B7Z553;D9ZGG2;P04004	Vitronectin;Vitronectin V65 subunit;Vitronectin V10 subunit;Somatomedin-B	VTN	3	1	1	1	7	23.605	214	8.226	7	0	11696000	11696000	0
C0JYZ2;D3DPG0;A0A0A0MTS7;Q8WZ42;D3DPF9;A0A0A0MRA3	C0JYZ2;D3DPG0;A0A0A0MTS7;Q8WZ42;D3DPF9;A0A0A0MRA3	Titin	TTN	6	4	4	4	0.1	3713.7	33423	23.918	0.1	0	32934000	32934000	0
C9JCA5;H9KVA2;C9JZN9;F8WA37;P45378	C9JCA5;H9KVA2;C9JZN9;F8WA37;P45378	Troponin T, fast skeletal muscle	TNNT3	5	2	2	2	7.2	25.018	208	15.53	7.2	0	100840000	100840000	0
C9JDL2;C9JEV8;C9JQ00;C9JJQ8;P68366	C9JDL2;C9JEV8;C9JQ00;C9JJQ8;P68366	Tubulin alpha-4A chain	TUBA4A	5	1	1	1	12.6	13.137	119	6.76	0	12.6	9238400	0	9238400
C9JGI3;E5KRG5;B2RBL3;P19971;A0A1W2PQK0;A0A1W2PP80	C9JGI3;E5KRG5;B2RBL3;P19971	Thymidine phosphorylase	TYMP;hCG_1988078	6	5	5	5	16.2	46.087	445	34.939	0	16.2	24498000	0	24498000
C9JH18;A0A024R4A5;I1E4Y6;Q6Y7W6	C9JH18;A0A024R4A5;I1E4Y6;Q6Y7W6	PERQ amino acid-rich with GYF domain-containing protein 2	GIGYF2;TNRC15	4	1	1	1	6	16.78	149	7.7	0	6	76204000	0	33672000
C9JUG7;F8W9N7;Q53GE2;Q53GC7;A4D0V4;P47755;A0A0D9SET8;A8K0T9;A0A024R0E5;P52907	C9JUG7;F8W9N7;Q53GE2;Q53GC7;A4D0V4;P47755;A0A0D9SET8;A8K0T9;A0A024R0E5;P52907	F-actin-capping protein subunit alpha-2;F-actin-capping protein subunit alpha-1	CAPZA2;CAPZA1	10	2	2	2	16.4	16.698	146	12.331	16.4	0	9465000	9465000	0
D2JYH4;P68133;P68032;P62736;A8K3K1;B3KUD3;P63267;B4DUI8;B7Z6P1;B3KW67;Q7Z7J6;A6NL76;Q13707;B3KPP5;C9JFL5;F6UVQ4;F6QUT6;B7Z6I1;A5A3E0;Q562S2;A0A173GMX4	D2JYH4;P68133;P68032;P62736;A8K3K1;B3KUD3;P63267;B4DUI8;B7Z6P1;B3KW67;Q7Z7J6;A6NL76;Q13707;B3KPP5	Actin, alpha skeletal muscle;Actin, alpha cardiac muscle 1;Actin, aortic smooth muscle;Actin, gamma-enteric smooth muscle	ACTA2;ACTA1;ACTC1;ACTG2	21	19	19	9	57.3	42.009	377	323.31	51.2	28.1	5078600000	3055400000	1474500000
D6RAA1;A0A0D9SFW3;D6RGG6;B7Z8X5;A0A024RDE8;Q96HC4	D6RAA1;A0A0D9SFW3;D6RGG6;B7Z8X5;A0A024RDE8;Q96HC4	PDZ and LIM domain protein 5	PDLIM5	6	1	1	1	42.1	4.348	38	6.8655	42.1	0	7999300	7999300	0
E1A689;C0JYY2;P04114;Q7Z7Q0;A8MUN2;A8K479;Q59HB3;Q13789	E1A689;C0JYY2;P04114;Q7Z7Q0;A8MUN2;A8K479	Apolipoprotein B-100;Apolipoprotein B-48	APOB	8	8	8	8	3	489.81	4344	57.898	3	0	158820000	158820000	0
E5RI09;E5RG95;K7EPM1;K7EKN2;E5RGZ4;P13929;B4DUJ6;K7EP84;E5RJH5;F5H1C3;F5H0C8;D3DTL4;Q6FHV6;A8K3B0;P09104	E5RI09;E5RG95;K7EPM1;K7EKN2;E5RGZ4;P13929;B4DUJ6	Enolase;Beta-enolase	ENO3	15	3	2	2	29.1	15.798	148	20.019	16.9	12.2	82751000	82751000	0
E7DVW5;Q01469	E7DVW5;Q01469	Fatty acid-binding protein, epidermal	FABP5	2	1	1	1	6.7	15.164	135	14.233	0	6.7	151320000	0	151320000
E7EX53;E7EQV9;A0A024R2Q4;P61313;B4DLP4;E7ENU7;E7ERA2;B4DEN1	E7EX53;E7EQV9;A0A024R2Q4;P61313;B4DLP4;E7ENU7	Ribosomal protein L15;60S ribosomal protein L15	RPL15	8	3	3	3	22.6	15.722	133	33.819	22.6	0	172970000	24218000	0
F5GXS0;A0A140TA44;A0A140TA32;A0A140TA29;A0A0G2JL54;P0C0L5;P0C0L4;A0A140TA49;A0A0G2JPR0;B4DIE5;Q6U2E7;B7Z1F8;B4E344;Q6U2M2;Q6U2L6;Q6U2K2;Q6U2H4;Q9UNU2;B4DDH0	F5GXS0;A0A140TA44;A0A140TA32;A0A140TA29;A0A0G2JL54;P0C0L5;P0C0L4;A0A140TA49;A0A0G2JPR0;B4DIE5	Complement C4-B;Complement C4 beta chain;Complement C4-B alpha chain;C4a anaphylatoxin;C4b-B;C4d-B;Complement C4 gamma chain;Complement C4-A;Complement C4 beta chain;Complement C4-A alpha chain;C4a anaphylatoxin;C4b-A;C4d-A;Complement C4 gamma chain	C4B;C4A	19	7	7	7	8	187.67	1698	58.93	8	0	142020000	142020000	0
F8VSL1;F8VX13;F8VNX2;F8VZQ1;A0A0S2Z4A1;Q96I60;A0A0S2Z4I1;A0A024R0Y5;P08237	F8VSL1;F8VX13;F8VNX2;F8VZQ1;A0A0S2Z4A1;Q96I60;A0A0S2Z4I1;A0A024R0Y5;P08237	ATP-dependent 6-phosphofructokinase;ATP-dependent 6-phosphofructokinase, muscle type	PFKM	9	1	1	1	15.1	14.835	139	6.9784	15.1	0	11357000	11357000	0
F8WDD7;Q9H7Z5;H7C0A3;F8WCF6;A0A0A6YYG9;P59998	F8WDD7;Q9H7Z5;H7C0A3;F8WCF6;A0A0A6YYG9;P59998	Actin-related protein 2/3 complex subunit 4	ARPC4;ARPC4-TTLL3	6	1	1	1	9.7	13.057	113	5.9363	0	9.7	2943500	0	2943500
G1UI17;A0A0S2A4E4;A0A0M4G3H8;P35573	G1UI17;A0A0S2A4E4;A0A0M4G3H8;P35573	Glycogen debranching enzyme;4-alpha-glucanotransferase;Amylo-alpha-1,6-glucosidase	AGL	4	1	1	1	1	143.72	1262	6.5447	1	0	7472700	7472700	0
G3GAU4;Q9UL78;A2NB46	G3GAU4;Q9UL78;A2NB46			3	1	1	1	16.8	11.606	107	18.948	16.8	0	49641000	49641000	0
H0YH81;Q0QEN7;V9HW31;P06576;F8W079	H0YH81;Q0QEN7;V9HW31;P06576;F8W079	ATP synthase subunit beta;ATP synthase subunit beta, mitochondrial	ATP5B;HEL-S-271	5	2	2	2	8	38.138	362	17.538	8	0	16031000	16031000	0
H0YH87;F8WB06;F8VQP2;Q2M2R5;V9GY86;Q99700;F8W0B5	H0YH87;F8WB06;F8VQP2;Q2M2R5;V9GY86;Q99700;F8W0B5	Ataxin-2	ATXN2	7	2	2	2	2.9	98.004	916	15.406	0	2.9	44731000	0	44731000
H0YJG0;B4DP56;V9HWH2;V9HW77;A0A0S2Z471;P12277	H0YJG0;B4DP56;V9HWH2;V9HW77;A0A0S2Z471;P12277	Creatine kinase B-type	CKB;HEL-S-29;HEL-211	6	1	1	1	7.3	20.147	179	7.1335	7.3	7.3	28822000	13224000	15598000
H0YNC7;H0YK48;H0YL52;D9YZV4;A0A0S2Z4G6;P09493;Q8TCG4;A0A0K0K1I0;D9YZV7;B7Z722;A0A024R5W6;Q6ZN40;H0YL80;H0YKX5;Q15657;Q1ZYL5;F5H7S3;H7BYY1;B7Z596;D9YZV5;C9IZA2;Q59GR8;H0YK20;H0YL42	H0YNC7;H0YK48;H0YL52;D9YZV4;A0A0S2Z4G6;P09493;Q8TCG4;A0A0K0K1I0;D9YZV7;B7Z722;A0A024R5W6;Q6ZN40;H0YL80;H0YKX5;Q15657;Q1ZYL5;F5H7S3;H7BYY1;B7Z596;D9YZV5;C9IZA2;Q59GR8	Tropomyosin alpha-1 chain	TPM1	24	11	11	4	36.8	25.47	223	288.56	36.8	4.5	2396700000	2226700000	7609000
H6VRG2	H6VRG2		KRT1	1	41	1	0	51.7	66.065	644	13.083	33.7	49.7	5673700000	260190000	5137400000
H6VRG3;H6VRG0;H6VRF8;H6VRG1;P04264;H6VRF9	H6VRG3;H6VRG0;H6VRF8;H6VRG1;P04264;H6VRF9	Keratin, type II cytoskeletal 1	KRT1	6	42	42	2	51.7	66.11	644	323.31	33.7	49.7	32036000000	4946400000	19282000000
H7C5W9;A0A0S2Z3L2;P16615;B3KS35	H7C5W9;A0A0S2Z3L2;P16615	Sarcoplasmic/endoplasmic reticulum calcium ATPase 2	ATP2A2	4	4	2	1	7.8	102.48	933	17.305	7.8	2.8	175200000	167890000	7301400
H9ZYJ2;P10599	H9ZYJ2;P10599	Thioredoxin	TXN	2	1	1	1	12.4	11.737	105	7.5781	0	0	0	0	0
J3JS69;P62269	J3JS69;P62269	40S ribosomal protein S18	RPS18	2	1	1	1	9.8	9.7672	82	8.5804	0	0	45006000	0	0
K7ENG2;B5BU25;P26368	K7ENG2;B5BU25;P26368	Splicing factor U2AF 65 kDa subunit	U2AF2	3	1	1	1	2.6	33.901	307	25.927	0	0	78160000	0	0
K7EQH4;K7EJP1;B4DGW3;K7ERX7;K7EK77;V9HW26;P25705	K7EQH4;K7EJP1;B4DGW3;K7ERX7;K7EK77;V9HW26;P25705	ATP synthase subunit alpha;ATP synthase subunit alpha, mitochondrial	ATP5A1;HEL-S-123m	7	2	2	2	23.4	11.715	111	14.448	23.4	0	16657000	16657000	0
K7EQW8	K7EQW8		TPM4	1	1	1	1	27.1	6.8126	59	13.869	27.1	27.1	81344000	51808000	29536000
K7ERE3;P13646;K7EMD9;Q2M2I5;I6L965;F8VZY9;Q6A165;B2RA03;A0A024RAY2;P05783;O76014	K7ERE3;P13646;K7EMD9	Keratin, type I cytoskeletal 13	KRT13	11	7	1	0	14	45.26	415	-2	6.5	9.6	22254000	0	0
L0CQ38;Q59G66;Q96A61	L0CQ38;Q59G66;Q96A61	Tripartite motif-containing protein 52	TRIM52	3	1	1	1	4.4	34.653	297	6.1322	0	0	392550000	0	0
L0R599	L0R599		CIRH1A	1	1	1	1	23.1	7.695	65	7.9949	23.1	0	218340000	45026000	0
L0R5A1	L0R5A1		CSF2RB	1	1	1	1	7.4	11.645	108	5.9401	0	7.4	26754000000	0	12880000000
O14942;B4DTA5;Q86SX1;Q6PK50;Q2VPJ6;Q8TBA7;B4DMA2;B4DGL0;A0A024RD80;K9JA46;Q14568;Q58FF8;P08238;P07900	O14942;B4DTA5;Q86SX1;Q6PK50;Q2VPJ6;Q8TBA7;B4DMA2;B4DGL0;A0A024RD80;K9JA46;Q14568;Q58FF8;P08238;P07900	Heat shock protein HSP 90-alpha A2;Putative heat shock protein HSP 90-beta 2;Heat shock protein HSP 90-beta;Heat shock protein HSP 90-alpha	HSP90AB1;HSP90AA1;EL52;HSP90AA2P;HSP90AB2P	14	1	1	1	9.2	14.066	130	5.9279	0	9.2	4008800	0	4008800
P01023;F8W7L3;Q9BQ22;B2R950;P20742	P01023	Alpha-2-macroglobulin	A2M	5	21	21	21	22.5	163.29	1474	164.83	22.5	0	828090000	828090000	0
P02533;A0A024R1X6;Q04695;F5GWP8;Q14666;Q13092;K7EPJ9;K7ENV3;K7ESE1;K7EMS3;A8MT21;C9JTG5	P02533;A0A024R1X6	Keratin, type I cytoskeletal 14	KRT14	12	28	23	15	61.2	51.561	472	323.31	10.4	54	2911400000	41304000	2590100000
P02768;F6KPG5;B2RBS8;A0A0C4DGB6;A8K9P0;B4DPP6;Q56G89;B7WNR0;H0YA55;D6RHD5;B4DPR2;A0A087WWT3;C9JKR2;H7C013	P02768;F6KPG5;B2RBS8;A0A0C4DGB6;A8K9P0;B4DPP6;Q56G89;B7WNR0;H0YA55;D6RHD5;B4DPR2;A0A087WWT3;C9JKR2	Serum albumin	ALB	14	35	35	35	66.7	69.366	609	323.31	66.7	0	4703100000	4703100000	0
P04259	P04259	Keratin, type II cytoskeletal 6B	KRT6B	1	27	2	1	45	60.066	564	24.201	12.4	45	145160000	0	145160000
P05109	P05109	Protein S100-A8;Protein S100-A8, N-terminally processed	S100A8	1	1	1	1	11.8	10.834	93	6.5479	11.8	11.8	33559000	8488300	12463000
P08779;B4DWU0;Q16195;B4E2J5;K7ENW6	P08779	Keratin, type I cytoskeletal 16	KRT16	5	26	14	14	53.1	51.267	473	226.87	7.6	50.7	1316200000	0	1303600000
P11055;Q5GJ67	P11055;Q5GJ67	Myosin-3	MYH3	2	22	1	1	10.8	223.9	1940	37.679	10.2	1.2	200290000	185180000	0
P13533;A5YM51;P12883;Q59EV3;Q5GJ54;Q14905;A0A1B1HY29;Q9H6N6;Q1ED46;A0A1B1HY30	P13533;A5YM51;P12883;Q59EV3;Q5GJ54	Myosin-6;Myosin-7	MYH6;MYH7	10	22	7	7	11.1	223.73	1939	196.57	11.1	2.6	2513800000	2237000000	19835000
P13535	P13535	Myosin-8	MYH8	1	35	7	1	16.7	222.76	1937	123.53	15.2	4.8	533700000	533700000	0
P13645;Q7Z3Y7;B4E2P9;B4DJM5;Q7Z3Z0;Q7Z3Y8;Q99456;Q6ZPD6;Q7Z3Y9	P13645	Keratin, type I cytoskeletal 10	KRT10	9	40	40	33	52.9	58.826	584	323.31	41.3	50	20825000000	1928500000	15174000000
P13647;B4E1T1;F8W0C6;B4DL32;H0YIN9;H0YI76;F8VV57;F8VU69	P13647;B4E1T1	Keratin, type II cytoskeletal 5	KRT5	8	29	17	17	39.3	62.378	590	323.31	14.2	35.1	2474800000	66763000	2347700000
P15924;Q4LE79;B4E2A0;B4DKX6;G1UI31;Q6ZP16;B4DWT7	P15924;Q4LE79	Desmoplakin	DSP;DSP variant protein	7	20	20	20	9.2	331.77	2871	202.62	0	9.2	479850000	0	475110000
P19012;B4E204;B3KVF5	P19012;B4E204;B3KVF5	Keratin, type I cytoskeletal 15	KRT15	3	7	1	0	12.1	49.211	456	14.251	5.5	10.1	108220000	0	0
P27482	P27482	Calmodulin-like protein 3	CALML3	1	2	2	2	19.5	16.891	149	11.972	0	19.5	30397000	0	30397000
P35527;K7EQQ3	P35527;K7EQQ3	Keratin, type I cytoskeletal 9	KRT9	2	27	26	26	47.2	62.064	623	323.31	40	19.6	4963900000	1554500000	273330000
P35609;B7Z4P6;Q59FD9;B7Z4K1;F6THM6;B7Z2N5;B7Z4P8;B2R8Y4;B4DZQ2;A0A087WSZ2;Q08043;B7Z4V1;Q4VAM3;K7EJH8;B4DSX0;Q86TX4;B4E337;Q96BG6;H9KV75;B7Z565;A0A024R694;A0A0S2Z3G9;P12814;O43707	P35609;B7Z4P6;Q59FD9;B7Z4K1;F6THM6;B7Z2N5	Alpha-actinin-2	ACTN2	24	9	9	9	13	103.85	894	71.908	13	0	183250000	183250000	0
P35908;Q0IIN1;Q7Z794	P35908	Keratin, type II cytoskeletal 2 epidermal	KRT2	3	34	30	23	67.8	65.432	639	323.31	28.8	65.3	6355100000	512110000	4813500000
P47929	P47929	Galectin-7	LGALS7	1	4	4	4	35.3	15.075	136	137.89	0	35.3	210600000	0	210600000
P48668;B2R853;B4DRY0	P48668;B2R853;B4DRY0	Keratin, type II cytoskeletal 6C	KRT6C	3	30	1	0	48.2	60.024	564	41.684	12.4	48.2	363740000	0	363740000
Q02413	Q02413	Desmoglein-1	DSG1	1	6	6	6	9.4	113.75	1049	43.931	1.8	9.4	67868000	3853400	58189000
Q06S70;Q9BQ50	Q06S70;Q9BQ50	Three prime repair exonuclease 2	TREX2	2	1	1	1	5	30.227	278	6.3581	0	5	3358000	0	3358000
Q08188	Q08188	Protein-glutamine gamma-glutamyltransferase E;Protein-glutamine gamma-glutamyltransferase E 50 kDa catalytic chain;Protein-glutamine gamma-glutamyltransferase E 27 kDa non-catalytic chain	TGM3	1	1	1	1	2.3	76.631	693	6.5962	0	2.3	7898600	0	7898600
Q0D2M2;B2R4S9;A8K9J7;A0A024RCL8;A0A024RCJ9;A0A024RCJ2;A0A024QZZ7;I6L9F7;U3KQK0;B4DR52;Q99880;Q99879;Q99877;Q93079;Q8N257;Q5QNW6;Q16778;P62807;P58876;P57053;P33778;P23527;P06899;O60814	Q0D2M2;B2R4S9;A8K9J7;A0A024RCL8;A0A024RCJ9;A0A024RCJ2;A0A024QZZ7;I6L9F7;U3KQK0;B4DR52;Q99880;Q99879;Q99877;Q93079;Q8N257;Q5QNW6;Q16778;P62807;P58876;P57053;P33778;P23527;P06899;O60814	Histone H2B;Histone H2B type 1-L;Histone H2B type 1-M;Histone H2B type 1-N;Histone H2B type 1-H;Histone H2B type 3-B;Histone H2B type 2-F;Histone H2B type 2-E;Histone H2B type 1-C/E/F/G/I;Histone H2B type 1-D;Histone H2B type F-S;Histone H2B type 1-B;Histone H2B type 1-O;Histone H2B type 1-J;Histone H2B type 1-K	HIST1H2BC;HIST1H2BI;HIST1H2BK;HIST1H2BN;HIST1H2BJ;HIST1H2BD;HIST1H2BM;HIST1H2BL;HIST1H2BH;HIST3H2BB;HIST2H2BF;HIST2H2BE;H2BFS;HIST1H2BB;HIST1H2BO	24	1	1	1	11.9	13.834	126	8.6895	11.9	0	12459000	12459000	0
Q0KKI6;Q8TCD0;Q5EFE6;V9HW34;Q6PJF2;Q7Z3Y4;Q6PIL8;Q6P5S8;Q6GMX0;P01834;P0DOX7;S6AWD6;S6AWF4;S6BGE9;S6AWD3;S6C4R6;S6B2A1;S6B2C3;S6B294;S6AWE3;Q569I7;B7ZMG8;Q7Z3Y5;A0A087X0Q4;A0A109PS54;A2NB45;A0A1W6IYL0;A0A1W6IYK2;Q9UL80;A2IPI1;A2NJV5;A0A0A0MRZ7;A0A075B6S6;A0A075B6S2;A0A075B6P5;A0A087WW87;P06310;P01615;P01614	Q0KKI6;Q8TCD0;Q5EFE6;V9HW34;Q6PJF2;Q7Z3Y4;Q6PIL8;Q6P5S8;Q6GMX0;P01834;P0DOX7	Ig kappa chain C region	HEL-213;IGK@;IGKC	39	6	6	6	44.7	24.03	219	71.352	44.7	0	1781400000	1781400000	0
Q0PHS6;E9PD92;Q0PHS1;E7EM57;E7EUI8;Q2VF42;Q2Q9H2;Q2Q9B7;B4DYA7;A8K8D9;P11413	Q0PHS6;E9PD92;Q0PHS1;E7EM57;E7EUI8;Q2VF42;Q2Q9H2;Q2Q9B7;B4DYA7;A8K8D9;P11413	Glucose-6-phosphate 1-dehydrogenase	G6PD	11	1	1	1	19	4.8725	42	6.3567	0	0	11425000	0	0
Q14006;A8K5T0;A0A024R962;P08603;U5TZG9;B1AKG0;A0A024R984;Q03591	Q14006;A8K5T0;A0A024R962;P08603;U5TZG9;B1AKG0;A0A024R984;Q03591	Complement factor H;Complement factor H-related protein 1	HF;hCG_40889;CFH;CFHR1	8	2	2	2	3.5	74.246	657	11.671	3.5	0	31589000	31589000	0
Q14525;O76011;O76015;Q16275;G3V1C2;Q8N9S8;B7ZM39;Q6A162	Q14525;O76011	Keratin, type I cuticular Ha3-II;Keratin, type I cuticular Ha4	KRT33B;KRT34	8	6	1	1	15.8	46.213	404	6.0622	15.8	1.7	9986000	9986000	0
Q14532;O76013	Q14532;O76013	Keratin, type I cuticular Ha2;Keratin, type I cuticular Ha6	KRT32;KRT36	2	4	1	1	8.7	50.343	448	-2	8.7	1.6	9609100	9609100	0
Q15323;O76009;A0A140TA69;A0A140TA62;C4AM86;A0A024R1T2;Q92764	Q15323;O76009;A0A140TA69;A0A140TA62	Keratin, type I cuticular Ha1;Keratin, type I cuticular Ha3-I	KRT31;KRT33A	7	8	7	3	21.6	47.237	416	48.787	16.3	7	110440000	106430000	4010700
Q16768	Q16768		GAPD	1	1	1	1	31.8	4.8944	44	11.264	31.8	31.8	798340000	736290000	37038000
Q16824;Q01212;I0B0K8;P20930	Q16824;Q01212;I0B0K8;P20930	Filaggrin	FLG	4	1	1	1	2.1	85.175	797	6.2915	0	2.1	8585300	0	8585300
Q3SY84	Q3SY84	Keratin, type II cytoskeletal 71	KRT71	1	2	1	1	3.1	57.291	523	10.757	1.7	1.3	16783000	16783000	0
Q3SYK8;F5H6Y5;F5H4J1;A8K394;A0A024R5G4;Q59HB8;A0A087WY61;A0A024R5M9;Q4LE64;Q14980	Q3SYK8;F5H6Y5;F5H4J1;A8K394;A0A024R5G4;Q59HB8;A0A087WY61;A0A024R5M9;Q4LE64;Q14980	Nuclear mitotic apparatus protein 1	NUMA1;NUMA1 variant protein	10	1	1	1	1.9	78.314	691	5.9527	0	1.9	24906000	0	24906000
Q53FC7;B3KSM6;B2R6X5;P17066;B4DFN9;B4DI39;B4DWK5;A8K5I0;A0A1U9X7W4;A0A0G2JIW1;Q59EJ3;P48741;P0DMV9;P0DMV8;E9PN25;E9PPY6;Q9UQC1;E9PI65;E9PQQ4;E9PQK7;E9PK54;E9PLF4;B4DTX2;B4DNV4;B4E1T6;B3KUS2;B4DNX1;Q53HF2;E9PNE6;B4DXY3;B4DVU9;B4E1S9;B4DNT8;B4DHP5;B3KTV0;E9PKE3;A0A024R6B5;Q53FA3;B2RCQ9;A0A1U9X7X9;A0A1U9X7X4;A0A1U9X7W7;V9HW22;Q53GZ6;B4DI54;P54652;P34931;P11142	Q53FC7;B3KSM6;B2R6X5;P17066;B4DFN9;B4DI39;B4DWK5;A8K5I0;A0A1U9X7W4;A0A0G2JIW1;Q59EJ3;P48741;P0DMV9;P0DMV8	Heat shock 70 kDa protein 6;Putative heat shock 70 kDa protein 7;Heat shock 70 kDa protein 1B;Heat shock 70 kDa protein 1A	HSPA6;HEL-S-103;HSPA7;HSPA1B;HSPA1A	48	3	3	3	6.2	71.003	643	18.28	0	6.2	25066000	0	25066000
Q53H37;Q9NZT1	Q53H37;Q9NZT1	Calmodulin-like protein 5	CALML5	2	3	3	3	32.2	15.876	146	32.447	0	32.2	120160000	0	120160000
Q53R15;P05976;I3L4B1;I3L1K6;A0A1C7CYY4;Q03399;P12829	Q53R15;P05976	Myosin light chain 1/3, skeletal muscle isoform	MYL1	7	3	3	3	20	15.603	140	156.76	20	0	1101300000	1022000000	0
Q53RT3	Q53RT3	Retroviral-like aspartic protease 1	ASPRV1	1	1	1	1	3.8	36.991	343	8.1597	0	3.8	198010000	0	198010000
Q59H27;E7EPL9;G5E9S2;B3KSP2;E7ET17;B4DI68;E7EWE5;B4DSD0;B4DDM5;B2R659;A0A0S2Z4J1;P51659	Q59H27;E7EPL9;G5E9S2;B3KSP2;E7ET17;B4DI68;E7EWE5;B4DSD0;B4DDM5;B2R659;A0A0S2Z4J1;P51659	Peroxisomal multifunctional enzyme type 2;(3R)-hydroxyacyl-CoA dehydrogenase;Enoyl-CoA hydratase 2	HSD17B4	12	1	1	1	5.7	51.107	471	7.7861	0	0	3670100	0	0
Q68D38;Q53S89;B3KM58;A8K132;O94925	Q68D38;Q53S89;B3KM58;A8K132;O94925	Glutaminase kidney isoform, mitochondrial	DKFZp686O15119;GLS	5	1	1	1	4.4	28.039	252	5.9967	0	4.4	3789000	0	3789000
Q6FGX9;Q53EY8;Q5T9B7;P00568	Q6FGX9;Q53EY8;Q5T9B7;P00568	Adenylate kinase isoenzyme 1	AK1	4	2	2	2	9.3	21.635	194	14.329	9.3	0	41746000	41746000	0
Q6IS14;P63241	Q6IS14;P63241	Eukaryotic translation initiation factor 5A-1-like;Eukaryotic translation initiation factor 5A-1	EIF5AL1;EIF5A	2	1	1	1	15.6	16.773	154	20.755	0	15.6	21190000	0	21190000
Q6KB66	Q6KB66	Keratin, type II cytoskeletal 80	KRT80	1	2	2	2	5.3	50.525	452	19.806	0	5.3	24732000	0	24732000
Q6MZU6	Q6MZU6		DKFZp686C15213	1	9	2	0	27.8	51.098	464	77.962	27.8	0	754820000	754820000	0
Q6N093;A0A286YEY4;P01859;Q68CN4	Q6N093;A0A286YEY4;P01859;Q68CN4	Ig gamma-2 chain C region	DKFZp686I04196;IGHG2;DKFZp686E23209	4	9	1	0	31.7	46.06	417	6.9334	31.7	0	74228000	74228000	0
Q6P6D7;Q6FHU2;Q6FHK8;Q53G35;P18669;B7Z9E5;B4DMJ7;B4DJA4;B4DKL5;Q0D2Q6;Q8N0Y7	Q6P6D7;Q6FHU2;Q6FHK8;Q53G35;P18669;B7Z9E5;B4DMJ7;B4DJA4;B4DKL5;Q0D2Q6;Q8N0Y7	Phosphoglycerate mutase;Phosphoglycerate mutase 1;Probable phosphoglycerate mutase 4	PGAM1;hCG_2015269;PGAM4	11	2	2	2	11.4	28.82	254	11.622	11.4	0	15220000	15220000	0
Q6PEJ8;B3KP77;Q6NSB4;A0A087WU08;A0A0C4DGL8;J3QLC9;J3QR68;H0Y300;P00738;H3BS21;A0A0A0MRD9;P00739	Q6PEJ8;B3KP77;Q6NSB4;A0A087WU08;A0A0C4DGL8;J3QLC9;J3QR68;H0Y300;P00738;H3BS21	Haptoglobin;Haptoglobin alpha chain;Haptoglobin beta chain	HP	12	3	3	3	16.2	25.458	228	19.422	16.2	0	21085000	21085000	0
Q7Z417	Q7Z417	Nuclear fragile X mental retardation-interacting protein 2	NUFIP2	1	3	3	3	6.6	76.12	695	17.833	1.9	6.6	62462000	7494700	54967000
Q86TT1;A0A1B0GUU9;P0DOX6;P01871	Q86TT1;A0A1B0GUU9;P0DOX6;P01871	Ig mu chain C region	IGHM	4	4	4	4	16.8	41.272	375	25.344	16.8	0	272920000	272920000	0
Q86W17;Q53ZX9;Q53ZX8;Q53ZX7;Q45KI0;H0Y8D1;Q6PK75;A6XMV8;Q5NV56;Q3SY20;Q3SY19;A0A0J9YYC8;Q7Z5F3;E7EQ64;A6XMV9;Q8NHM4;P07478;P07477	Q86W17;Q53ZX9;Q53ZX8;Q53ZX7;Q45KI0;H0Y8D1;Q6PK75;A6XMV8;Q5NV56;Q3SY20;Q3SY19;A0A0J9YYC8;Q7Z5F3;E7EQ64;A6XMV9;Q8NHM4;P07478;P07477	Putative trypsin-6;Trypsin-2;Trypsin-1;Alpha-trypsin chain 1;Alpha-trypsin chain 2	PRSS1;PRSS2;TRY8;PRSS3P2	18	1	1	1	23.8	9.1995	84	9.0537	0	23.8	1593400000	0	560330000
Q86W20;B1AN99;A1A508;Q8N2U3;Q7Z5F4;P35030	Q86W20;B1AN99;A1A508;Q8N2U3;Q7Z5F4;P35030	Trypsin-3	PRSS1;PRSS3	6	1	1	1	15.5	9.1665	84	6.2	15.5	0	10913000	5544700	0
Q8IZH7;Q8IZH8;Q8IZH9	Q8IZH7;Q8IZH8;Q8IZH9			3	1	1	1	14.9	11.324	101	8.3627	14.9	0	27518000	27518000	0
Q8N1N4;B4DQ49	Q8N1N4;B4DQ49	Keratin, type II cytoskeletal 78	KRT78	2	2	1	1	3.7	56.865	520	13.942	1.3	3.7	48909000	0	19961000
Q8N3X5;Q7Z675;Q7Z6E5;O14983	Q8N3X5;Q7Z675;Q7Z6E5;O14983	Calcium-transporting ATPase;Sarcoplasmic/endoplasmic reticulum calcium ATPase 1	DKFZp779O2152;DKFZp779G2251;ATP2A1	4	4	4	1	8.1	92.312	844	27.985	8.1	0	69409000	62887000	0
Q8N519;Q5I6Y5;Q3BDU5;W8QEH3;P02545;W5X314;Q5TCI8;H0YAB0;B4DFR3	Q8N519;Q5I6Y5;Q3BDU5;W8QEH3;P02545;W5X314;Q5TCI8	Prelamin-A/C;Lamin-A/C	LMNA	9	4	4	4	10.3	53.197	465	26.392	0	10.3	52136000	0	52136000
Q8WTW4	Q8WTW4	Nitrogen permease regulator 2-like protein	NPRL2	1	1	1	1	3.4	43.658	380	6.0915	0	3.4	100320000	0	30429000
Q8WVV4	Q8WVV4	Protein POF1B	POF1B	1	3	3	3	6.5	68.064	589	19.654	0	6.5	54845000	0	54845000
Q8XBX7	Q8XBX7		st47	1	8	8	8	45.1	26.058	224	140.2	26.8	45.1	2784600000	388180000	2338600000
[truncated: 15 more rows]
