# Supplementary material for: Genetically incorporated crosslinkers reveal NleE attenuates host autophagy dependent on PSMD10
Source: eLife. 2021 Jul 13;10:e69047. doi: 10.7554/eLife.69047 (PMC8324295; doi:10.7554/eLife.69047)
Supplement: Figure 3—figure supplement 1—source data 1. [file elife-69047-fig3-figsupp1-data1.xls]

## Sheet: Sheet1
Sample	NleE level	actin level	NleE/actin	normalized
HEK293T WT OE NleE,-MG132	10250	5464	1.87592	1
HEK293T WT OE NleE,+MG132	11840	7363	1.60804	0.857203
HEK293T PSMD10 KO OE NleE,-MG132	12983	6819	1.90394	1.01494
HEK293T PSMD10 KO OE NleE,+MG132	13843	6057	2.28545	1.21831
HEK293T PSMD10 KO OE PSMD10+NleE,-MG132	15204	5883	2.5844	1.37767
HEK293T PSMD10 KO OE PSMD10+NleE,+MG132	10355	4713	2.19711	1.17122
