# Supplementary material for: Genetically incorporated crosslinkers reveal NleE attenuates host autophagy dependent on PSMD10
Source: eLife. 2021 Jul 13;10:e69047. doi: 10.7554/eLife.69047 (PMC8324295; doi:10.7554/eLife.69047)
Supplement: Figure 3—source data 1. [file elife-69047-fig3-data1.xls]

## Sheet: Sheet1
Sample	HeLa WT Ctrl	HeLa PSMD10 KO Ctrl	HeLa PSMD10 KO OE NleE
	232	69	34
	252	84	66
	224	159	239
	206	119	89
	232	117	88
	192	62	150
	202	96	104
	219	62	68
	181	161	162
	194	198	102
	165	96	152
	155	78	106
	153	97	62
	128	146	102
	133	89	77
	122	89	201
	93	123	114
	91	206	123
	78	119	82
	72	82	96
	56	109	160
	63	149	189
	53	92	121
	48	104	68
	52	39	145
Mean	143.84	109.8	116
Standard deviation	67.4776	41.2189	48.7682
