# Supplementary material for: Genetically incorporated crosslinkers reveal NleE attenuates host autophagy dependent on PSMD10
Source: eLife. 2021 Jul 13;10:e69047. doi: 10.7554/eLife.69047 (PMC8324295; doi:10.7554/eLife.69047)
Supplement: Figure 3—source data 2. [file elife-69047-fig3-data2.xls]

## Sheet: Sheet1
Sample	HeLa WT Ctrl	HeLa PSMD10 KO Ctrl	HeLa PSMD10 KO OE NleE
	97	40	23
	96	42	33
	96	29	40
	95	11	45
	95	46	65
	95	42	72
	94	50	54
	94	54	31
	93	55	37
	85	38	28
	81	40	76
	80	28	48
	79	40	65
	75	42	60
	74	34	46
	73	53	37
	71	30	75
	66	39	46
	54	67	39
	48	88	58
	48	53	57
	45	58	37
	43	30	31
	41	22	61
Mean	75.75	42.9583	48.5
Standard deviation	19.6231	15.7769	15.5256
