# Supplementary material for: Genetically incorporated crosslinkers reveal NleE attenuates host autophagy dependent on PSMD10
Source: eLife. 2021 Jul 13;10:e69047. doi: 10.7554/eLife.69047 (PMC8324295; doi:10.7554/eLife.69047)
Supplement: Figure 3—source data 3. [file elife-69047-fig3-data3.xls]

## Sheet: Sheet1
Sample	PSMD10	PSMD10+NleE
	242	164
	134	85
	67	151
	124	113
	189	83
	218	104
	215	133
	132	132
	142	54
	114	70
	150	88
	219	67
	186	84
	108	142
	153	95
	75	78
	138	108
	178	150
	57	120
	163	146
	143	134
	131	99
	123	116
	294	95
	194	128
	116	68
	45	144
Mean	150	109.296
Standard deviation	58.0225	30.5184
