# Supplementary material for: Genetically incorporated crosslinkers reveal NleE attenuates host autophagy dependent on PSMD10
Source: eLife. 2021 Jul 13;10:e69047. doi: 10.7554/eLife.69047 (PMC8324295; doi:10.7554/eLife.69047)
Supplement: Figure 3—source data 4. [file elife-69047-fig3-data4.xls]

## Sheet: Sheet1
Sample	PSMD10	PSMD10+NleE
	85	33
	57	43
	60	40
	93	36
	49	41
	70	79
	48	61
	59	50
	73	81
	68	60
	59	43
	82	70
	56	44
	80	84
	86	68
	112	70
	70	54
	81	88
	52	58
	66	54
	69	47
	101	50
	49	19
	83	49
	51	40
	118	44
	87	87
	59	39
Mean	72.25	54.7143
Standard deviation	18.8849	17.8655
