# Supplementary material for: Genetically incorporated crosslinkers reveal NleE attenuates host autophagy dependent on PSMD10
Source: eLife. 2021 Jul 13;10:e69047. doi: 10.7554/eLife.69047 (PMC8324295; doi:10.7554/eLife.69047)
Supplement: Figure 3—source data 5. [file elife-69047-fig3-data5.sourcedata.xls]

## Sheet: Sheet1
Sample	EPEC WT	EPEC NleE KO
	10	9
	10	16
	12	9
	12	15
	17	18
	14	21
	11	14
	14	15
	9	16
	8	15
	7	9
	9	9
	14	10
	11	15
	13	12
	12	13
	18	10
	11	16
	20	7
	10	9
	16	10
	11	5
	13	11
	14	12
	13	12
Mean	12.36	12.32
Standard deviation	3.10752	3.73854
