# Supplementary material for: Genetically incorporated crosslinkers reveal NleE attenuates host autophagy dependent on PSMD10
Source: eLife. 2021 Jul 13;10:e69047. doi: 10.7554/eLife.69047 (PMC8324295; doi:10.7554/eLife.69047)
Supplement: Figure 4—figure supplement 1—source data 1. [file elife-69047-fig4-figsupp1-data1.xls]

## Sheet: PSMD10 list
No.	Average Mass	Intensity	Relative Abundance
1	27488.3	570135040	100
	Charge State	Measured Average m/z
	17	1617.93
	18	1528.17
	19	1447.76
	20	1375.43
	21	1309.99
	22	1250.45
	23	1196.16
	24	1146.37
	25	1100.54
	26	1058.27
	27	1019.1
	28	982.733
	29	948.895
	30	917.285
	31	887.726
	32	860.016
	33	833.975
	34	809.491
	35	786.384
	36	764.543
	37	743.936
	38	724.396
	39	705.816
	40	688.194
	41	671.42
	42	655.485
	43	640.332
	44	625.755
2	27666.3	147194400	25.8175
	Charge State	Measured Average m/z
	20	1384.34
	21	1318.45
	22	1258.58
	23	1203.87
	24	1153.78
	25	1107.69
	26	1065.09
	27	1025.7
	28	989.071
	29	955.025
	30	923.294
	31	893.483
	32	865.582
	33	839.38
	34	814.727
	35	791.442
	36	769.509
	37	748.789
	38	729.047
	39	710.392
	40	692.685
	41	675.757
	42	659.724
	43	644.431
	44	629.771
3	27471.4	109042296	19.1257
	Charge State	Measured Average m/z
	23	1195.38
	24	1145.69
	25	1099.9
	26	1057.64
	27	1018.51
	28	982.102
	29	948.293
	30	916.697
	31	887.203
	32	859.502
	33	833.469
	34	809.003
	35	785.91
	36	764.116
	37	743.471
	38	723.924
	39	705.395
	40	687.825
	41	671.068
	42	655.057
	43	639.847
4	27586.8	101604792	17.8212
	Charge State	Measured Average m/z
	19	1452.85
	20	1380.3
	21	1314.66
	22	1254.96
	23	1200.44
	24	1150.44
	25	1104.5
	26	1062.02
	27	1022.69
	28	986.263
	29	952.272
	30	920.574
	31	890.915
	32	863.085
	33	836.993
	34	812.362
	35	789.187
	36	767.386
	37	746.651
	38	726.932
	39	708.363
	40	690.704
	41	673.877
	42	657.866
5	27506.2	66286516	11.6265
	Charge State	Measured Average m/z
	25	1101.21
	26	1058.94
	27	1019.77
	28	983.374
	29	949.521
	30	917.895
	31	888.319
	32	860.573
	33	834.552
	34	810.003
	35	786.931
	36	765.065
	37	744.425
	38	724.851
	39	706.306
	40	688.674
	41	671.872
	42	655.887
6	27444.1	63566572	11.1494
	Charge State	Measured Average m/z
	24	1144.43
	25	1098.76
	26	1056.59
	27	1017.56
	28	981.147
	29	947.379
	30	915.798
	31	886.348
	32	858.632
	33	832.622
	34	808.229
	35	785.12
	36	763.346
	37	742.721
	38	723.206
	39	704.64
7	27430	52307480	9.17458
	Charge State	Measured Average m/z
	28	980.652
	29	946.871
	30	915.313
	31	885.855
	32	858.197
	33	832.186
	34	807.775
	35	784.724
	36	762.979
	37	742.353
	38	722.786
	39	704.398
8	27457.8	50373480	8.83536
	Charge State	Measured Average m/z
	24	1145.15
	25	1099.29
	26	1057.15
	27	1018.05
	28	981.712
	29	947.803
	30	916.212
	31	886.764
	32	859.069
	33	833.098
	34	808.593
	35	785.52
	36	763.732
	37	743.125
	38	723.554
	39	705.05
	40	687.416
	41	670.668
	42	654.763
	43	639.526
9	27532.1	48363908	8.48289
	Charge State	Measured Average m/z
	26	1059.86
	27	1020.67
	28	984.343
	29	950.36
	30	918.798
	31	889.191
	32	861.442
	33	835.329
	34	810.764
	35	787.6
10	13372.8	8.10876e+06	1.42225
	Charge State	Measured Average m/z
	14	956.116
	15	892.448
	16	836.831
	17	787.6
	18	743.936
	19	704.822
	20	669.658
	21	637.872
11	27569.2	43741124	7.67206
	Charge State	Measured Average m/z
	22	1254.17
	23	1199.61
	24	1149.72
	25	1103.68
	26	1061.29
	27	1022.1
	28	985.573
	29	951.727
	30	919.953
	31	890.403
	32	862.598
	33	836.451
	34	811.827
	35	788.684
	36	766.825
	37	746.158
	38	726.542
	39	707.957
12	27415.1	43504812	7.63062
	Charge State	Measured Average m/z
	28	980.198
	29	946.404
	30	914.81
	31	885.34
	32	857.713
	33	831.773
	34	807.351
	35	784.278
	36	762.553
	37	742.001
	38	722.502
	39	703.985
	40	686.39
	41	669.658
	42	653.728
	43	638.523
13	27519.7	32748304	5.74396
	Charge State	Measured Average m/z
	25	1101.73
	26	1059.46
	27	1020.24
	28	983.856
	29	949.986
	30	918.262
	31	888.73
	32	860.978
	33	834.892
	34	810.405
	35	787.32
	36	765.426
	37	744.814
	38	725.27
	39	706.638
	40	688.984
14	27649.8	12185654	2.13733
	Charge State	Measured Average m/z
	30	922.631
	31	892.962
	32	865.07
	33	838.922
	34	814.23
	35	791.056
	36	769.027
	37	748.274
	38	728.624
15	27400.5	18219470	3.19564
	Charge State	Measured Average m/z
	31	884.807
	32	857.243
	33	831.289
	34	806.922
	35	783.893
	36	762.123
	37	741.56
	38	722.099
	39	703.585
	40	686.071
	41	669.336
16	27684.3	19760546	3.46594
	Charge State	Measured Average m/z
	27	1026.36
	28	989.73
	29	955.636
	30	923.8
	31	894.019
	32	866.125
	33	839.933
	34	815.222
	35	791.953
	36	770.018
	37	749.26
	38	729.592
17	20550.7	3.15487e+06	0.553355
	Charge State	Measured Average m/z
	26	791.442
	27	762.123
	28	734.97
	29	709.599
	30	686.071
	31	663.984
	32	643.192
	33	623.755
18	27607.5	17792122	3.12069
	Charge State	Measured Average m/z
	30	921.243
	31	891.659
	32	863.734
	33	837.55
	34	813.006
	35	789.858
	36	767.909
	37	747.129
	38	727.53
	39	708.851
19	27552.9	18005408	3.1581
	Charge State	Measured Average m/z
	26	1060.8
	27	1021.45
	28	984.992
	29	951.138
	30	919.492
	31	889.727
	32	862.072
	33	835.919
	34	811.391
	35	788.215
20	16552.1	4624370	0.811101
	Charge State	Measured Average m/z
	18	920.574
	19	872.197
	20	828.584
	21	789.187
	22	753.331
	23	720.671
	24	690.704
21	22751	9191526	1.61217
	Charge State	Measured Average m/z
	27	843.648
	28	813.52
	29	785.52
	30	759.346
	31	734.97
	32	711.985
	33	690.411
	34	670.201
22	14230.3	3101747	0.544037
	Charge State	Measured Average m/z
	16	890.403
	17	838.14
	18	791.542
	19	749.969
	20	712.518
	21	678.624
23	11294.7	5.30095e+06	0.92977
	Charge State	Measured Average m/z
	13	869.881
	14	807.775
	15	753.98
	16	706.87
	17	665.399
	18	628.48

## Sheet: PSMD10+NleE list
No.	Average Mass	Intensity	Relative Abundance	RT Range
1	27488.4	926950464	100	6.526-6.744
	Charge State	Measured Average m/z
	17	1617.98
	18	1528.14
	19	1447.77
	20	1375.45
	21	1310.01
	22	1250.49
	23	1196.15
	24	1146.37
	25	1100.52
	26	1058.27
	27	1019.09
	28	982.739
	29	948.88
	30	917.288
	31	887.742
	32	860.019
	33	833.99
	34	809.486
	35	786.388
	36	764.553
	37	743.971
	38	724.356
	39	705.814
	40	688.238
	41	671.477
	42	655.547
	43	640.232
	44	625.684
	45	611.833
	46	598.58
2	27666.5	224912992	24.2638	6.526-6.744
	Charge State	Measured Average m/z
	19	1457.06
	20	1384.34
	21	1318.41
	22	1258.59
	23	1203.93
	24	1153.8
	25	1107.69
	26	1065.07
	27	1025.74
	28	989.09
	29	955.008
	30	923.24
	31	893.485
	32	865.61
	33	839.392
	34	814.702
	35	791.469
	36	769.574
	37	748.78
	38	729.056
	39	710.368
	40	692.684
	41	675.809
	42	659.688
	43	644.397
3	27586.5	207343696	22.3684	6.526-6.744
	Charge State	Measured Average m/z
	18	1533.53
	19	1453
	20	1380.32
	21	1314.67
	22	1254.88
	23	1200.4
	24	1150.47
	25	1104.45
	26	1062.01
	27	1022.72
	28	986.234
	29	952.274
	30	920.541
	31	890.935
	32	863.073
	33	836.95
	34	812.362
	35	789.185
	36	767.322
	37	746.633
	38	726.925
	39	708.35
	40	690.617
4	27471.4	135900752	14.6611	6.526-6.744
	Charge State	Measured Average m/z
	26	1057.58
	27	1018.45
	28	982.087
	29	948.297
	30	916.72
	31	887.2
	32	859.499
	33	833.485
	34	809.008
	35	785.883
	36	764.098
	37	743.488
	38	723.918
	39	705.382
	40	687.828
5	27530.8	119025552	12.8406	6.526-6.744
	Charge State	Measured Average m/z
	21	1312.02
	22	1252.28
	23	1198
	24	1148.1
	25	1102.26
	26	1059.86
	27	1020.67
	28	984.16
	29	950.344
	30	918.773
	31	889.074
	32	861.368
	33	835.226
	34	810.701
	35	787.648
	36	765.762
	37	745.073
	38	725.474
	39	706.933
6	27444.1	105461904	11.3773	6.526-6.744
	Charge State	Measured Average m/z
	23	1194.24
	24	1144.5
	25	1098.74
	26	1056.54
	27	1017.49
	28	981.168
	29	947.382
	30	915.816
	31	886.294
	32	858.659
	33	832.591
	34	808.187
	35	785.107
	36	763.344
	37	742.709
	38	723.204
	39	704.682
	40	687.134
7	27506.3	88896536	9.59021	6.526-6.744
	Charge State	Measured Average m/z
	24	1147.13
	25	1101.25
	26	1058.99
	27	1019.81
	28	983.379
	29	949.492
	30	917.929
	31	888.348
	32	860.586
	33	834.524
	34	810.031
	35	786.867
	36	765.064
	37	744.402
	38	724.817
	39	706.256
	40	688.614
	41	671.874
	42	655.95
8	27429.6	59712688	6.44184	6.526-6.744
	Charge State	Measured Average m/z
	31	885.823
	32	858.197
	33	832.233
	34	807.777
	35	784.685
	36	762.977
	37	742.332
	38	722.887
	39	704.327
	40	686.731
	41	669.995
9	27414.4	67328456	7.26344	6.526-6.744
	Charge State	Measured Average m/z
	29	946.394
	30	914.902
	31	885.41
	32	857.739
	33	831.765
	34	807.296
	35	784.274
	36	762.526
	37	741.94
	38	722.425
	39	703.856
	40	686.343
	41	669.57
10	27457	53064120	5.72459	6.526-6.744
	Charge State	Measured Average m/z
	28	981.591
	29	947.838
	30	916.242
	31	886.742
	32	859.055
	33	833.069
	34	808.545
	35	785.503
	36	763.671
	37	743.056
	38	723.568
	39	705.053
	40	687.489
	41	670.661
	42	654.758
11	27649.7	39099492	4.21808	6.526-6.744
	Charge State	Measured Average m/z
	31	892.912
	32	865.053
	33	838.842
	34	814.193
	35	791.053
	36	769.094
	37	748.277
	38	728.621
	39	710
	40	692.28
	41	675.361
12	27685.2	28043882	3.02539	6.526-6.744
	Charge State	Measured Average m/z
	28	989.707
	29	955.614
	30	923.848
	31	894.132
	32	866.116
	33	839.973
	34	815.264
	35	792.009
	36	770.036
	37	749.323
13	18715.6	12536436	1.35244	6.526-6.744
	Charge State	Measured Average m/z
	22	851.748
	23	814.702
	24	780.901
	25	749.69
	26	720.901
	27	694.229
	28	669.384
	29	646.36
	30	624.891
14	13785	26973586	2.90993	6.526-6.744
	Charge State	Measured Average m/z
	12	1149.71
	13	1061.39
	14	985.633
	15	919.998
	16	862.56
	17	811.904
	18	766.914
15	19171.3	13090082	1.41217	6.526-6.744
	Charge State	Measured Average m/z
	23	834.524
	24	799.763
	25	767.895
	26	738.366
	27	711.108
	28	685.7
	29	662.102
	30	640.048
16	20592.5	9718738	1.04846	6.526-6.744
	Charge State	Measured Average m/z
	24	859.055
	25	824.755
	26	792.982
	27	763.671
	28	736.463
	29	711.108
	30	687.489
	31	665.29
17	13776.5	17848748	1.92553	6.526-6.744
	Charge State	Measured Average m/z
	14	985.105
	15	919.458
	16	862.031
	17	811.334
	18	766.415
	19	726.121
	20	689.809
18	13699.9	16758857	1.80796	6.526-6.744
	Charge State	Measured Average m/z
	15	914.364
	16	857.279
	17	806.843
	18	762.073
	19	722.08
	20	685.965
19	13036.4	9989941	1.07772	6.526-6.744
	Charge State	Measured Average m/z
	14	932.193
	15	870.084
	16	815.732
	17	767.895
	18	725.217
	19	687.134
