# Supplementary material for: Genetically incorporated crosslinkers reveal NleE attenuates host autophagy dependent on PSMD10
Source: eLife. 2021 Jul 13;10:e69047. doi: 10.7554/eLife.69047 (PMC8324295; doi:10.7554/eLife.69047)
Supplement: Figure 4—figure supplement 1—source data 2. [file elife-69047-fig4-figsupp1-data2.xls]

## Sheet: PSMD10 proteinGroups
Protein IDs	Majority protein IDs	Protein names	Gene names	Number of proteins	Peptides	Razor + unique peptides	Unique peptides	Sequence coverage [%]	Mol. weight [kDa]	Sequence length	Score	Intensity	Methyl (C) site positions
O75832;B1AJY7	O75832;B1AJY7	26S proteasome non-ATPase regulatory subunit 10	PSMD10	2	24	24	2	75.7	24.428	226	323.31	572190000000
Q8WVW5;Q53GK6;Q53G99;Q53G76;Q1KLZ0;P63261;P60709;B4DVQ0;B4DW52;B4E335;B4E3A4;A0A2R8Y793;B3KWQ3;Q6PJ43;B7ZAP6;Q96DE1;Q96FU6;V9HVZ7;F1BXA6;A4UCT3;A5GZ75;I3L3I0;I3L1U9;I3L4N8;B3KUD3;A1E282;G5E9R0;K7EM38;E7EVS6;I3L3R2;A0A2R8YGF8;J3KT65;Q562R1;Q6S8J3;A5A3E0;Q9UE89;A0A2R8YFE2;C9JUM1;C9JZR7;Q562Z7;Q562Y6;Q562X9;Q562S0;Q562N8;Q562N0;Q562L5;A0A2R8YEA7;B3KPP5;Q9BYX7;P0CG38;C9JTX5;Q562R8;Q562P0;Q562L9;Q562Y…	Q8WVW5;Q53GK6;Q53G99;Q53G76;Q1KLZ0;P63261;P60709;B4DVQ0;B4DW52;B4E335;B4E3A4;A0A2R8Y793;B3KWQ3;Q6PJ43;B7ZAP6;Q96DE1;Q96FU6;V9HVZ7	Actin, cytoplasmic 2;Actin, cytoplasmic 2, N-terminally processed;Actin, cytoplasmic 1;Actin, cytoplasmic 1, N-terminally processed	PS1TP5BP1;ACTG1;ACTB;HEL-176	102	13	13	7	53.4	40.503	363	111.43	15628000000
A8K2M0;P43686	A8K2M0;P43686	26S protease regulatory subunit 6B	PSMC4	2	22	22	22	74.4	47.366	418	199.96	15203000000
P13639;Q8TA90;Q6PK56;B4DPU3;B4DRE8;B4DMC6;Q6W6M8	P13639;Q8TA90;Q6PK56;B4DPU3	Elongation factor 2	EEF2	7	31	31	30	47.8	95.337	858	282.9	14093000000
Q59EG8;Q13200;B4DM22;Q9NSM5;Q13041;H7C1H2;H7C2Q3;C9JPC0;F8WBS8	Q59EG8;Q13200;B4DM22;Q9NSM5;Q13041	26S proteasome non-ATPase regulatory subunit 2	PSMD2;DKFZp564A2282	9	24	24	24	38.2	100.59	913	237.72	13094000000
A8K5I0;A0A0G2JIW1;P0DMV9;P0DMV8;A0A1U9X7W4;B4DNT8;Q59EJ3;B4DWK5;B4DI39;B4E1S9;B4DFN9;B4E388;B4DVU9;V9GZ37;B3KTT5;B4DNX1;B4E1T6;Q9UQC1;B4DNV4;B4DHP5;Q53FA3;B2RCQ9;A0A1U9X7X9;A0A1U9X7X4;A0A1U9X7W7;B4DI54;P34931;B4DXY3	A8K5I0;A0A0G2JIW1;P0DMV9;P0DMV8;A0A1U9X7W4;B4DNT8;Q59EJ3;B4DWK5;B4DI39;B4E1S9;B4DFN9;B4E388;B4DVU9;V9GZ37;B3KTT5	Heat shock 70 kDa protein 1B;Heat shock 70 kDa protein 1A	HEL-S-103;HSPA1B;HSPA1A	28	25	25	18	47.4	70.051	641	222.5	12874000000
Q6IPT9;Q6IPS9;Q6IPN6;Q53HR5;Q53HQ7;Q53HM9;Q5VTE0;P68104;Q96RE1;A0A087WVQ9;A8K9C4;Q53GA1;Q53GE9;Q53G85;Q8IUB0;B4DNE0;B4DV42;Q504Z0;Q53HR1;Q9NZS6;A0A087WV01;Q9H2I7;Q53G89;Q96C29;Q8TBL1;Q6P082;Q96CD8;Q6P4C9;B4E2C5;A9X7H1;Q16577;A0A2U3TZH3;Q05639;Q59GP5;A6PW80;Q5JR01;A0A2R8Y488;Q14222;Q6NS35;Q2F837;A0A2R8YDN5;Q6NSH7;A0A2R8Y660;Q96EB3	Q6IPT9;Q6IPS9;Q6IPN6;Q53HR5;Q53HQ7;Q53HM9;Q5VTE0;P68104;Q96RE1;A0A087WVQ9;A8K9C4;Q53GA1;Q53GE9;Q53G85;Q8IUB0;B4DNE0;B4DV42;Q504Z0;Q53HR1;Q9NZS6;A0A087WV01;Q9H2I7;Q53G89;Q96C29;Q8TBL1;Q6P082;Q96CD8;Q6P4C9;B4E2C5	Elongation factor 1-alpha;Putative elongation factor 1-alpha-like 3;Elongation factor 1-alpha 1	EEF1A1;EEF1A1P5;EEF1A1L14	44	9	9	9	30.7	50.184	462	95.001	10106000000
A0A140VJS3;P62195;Q59GS3;J3KRP2;J3QSA9;J3QQM1;J3QLH6;J3QRW1;J3QSE0;J3QRR3;J3KTQ9;Q8NB90	A0A140VJS3;P62195;Q59GS3;J3KRP2;J3QSA9;J3QQM1;J3QLH6	26S protease regulatory subunit 8	PSMC5	12	20	20	20	61.3	45.626	406	193.66	9293600000
P26599;A6NLN1;A0A0U1RRM4;A0A0D9SF20;Q59H49;A0A087WU68;K7EKJ7;K7EK45;K7ES59;A0A087WUW5;K7ELW5;A0A024R163;O95758	P26599;A6NLN1;A0A0U1RRM4	Polypyrimidine tract-binding protein 1	PTBP1	13	13	13	13	42.4	57.221	531	188.58	7567400000
H6VRG2;O95678	H6VRG2		KRT1	2	16	16	0	27.3	66.065	644	155.64	7210700000
B4DUQ1;A0A024R228;P61978;B4DFF1;Q5EC54;Q5T6W2;B3KU16;S4R457	B4DUQ1;A0A024R228;P61978;B4DFF1;Q5EC54;Q5T6W2	Heterogeneous nuclear ribonucleoprotein K	HNRPK;HNRNPK	8	12	12	12	35.3	48.51	439	133.9	7071300000
B7Z4V2;V9HW84;P38646;Q8N1C8;B7Z1V7;B7Z4T3;A1XP52;Q2F839;H0YBG6;D6RJI2;D6RA73;H0Y8S0	B7Z4V2;V9HW84;P38646;Q8N1C8;B7Z1V7;B7Z4T3	Stress-70 protein, mitochondrial	HEL-S-124m;HSPA9	12	19	19	19	35.3	72.4	665	180.37	6786900000
Q8NC51;Q63HR1;Q5VU21;D3DQ70;D3DQ69	Q8NC51;Q63HR1;Q5VU21;D3DQ70;D3DQ69	Plasminogen activator inhibitor 1 RNA-binding protein	SERBP1;DKFZp686P17171	5	15	15	15	42.9	44.965	408	135.58	6547900000
Q6NVC0;P05141	Q6NVC0;P05141	ADP/ATP translocase 2;ADP/ATP translocase 2, N-terminally processed	SLC25A5	2	10	10	4	32.2	35.293	323	73.879	6152100000
B7ZAF0;Q5JP53;Q5SU16;P07437;Q5ST81;Q6LC01;B4DY90;B7ZAK1;Q9BUU9;B4E052;B4DQN9;B2R6L0;Q96B85;B4DXZ5;B4DMU8;B4DMJ5;Q1KSF8;A5D907;A5D906;A1L195;Q6P602;A0A075B736;Q5SQY0;A6NNZ2;A4UCU2	B7ZAF0;Q5JP53;Q5SU16;P07437;Q5ST81;Q6LC01;B4DY90;B7ZAK1;Q9BUU9;B4E052;B4DQN9;B2R6L0;Q96B85;B4DXZ5;B4DMU8;B4DMJ5;Q1KSF8	Tubulin beta chain	TUBB;XTP3TPATP1	25	18	18	3	54.2	46.566	415	185.5	5662100000
A0A125QYY8	A0A125QYY8			1	1	1	1	11.6	12.167	112	40.497	4972200000
V9HW22;Q53GZ6;P11142;E9PKE3;Q96IS6;B3KTV0;Q53HF2;E9PNE6;E9PN89;B4E1Q1;A8K7Q2;E9PQQ4;E9PQK7;E9PK54;E9PLF4;B4DTX2;E9PPY6;E9PI65;E9PS65;Q96BE0;A0A024R6B5;P54652;E9PN25;E9PM13;Q96H53;A4D111;B3KUS2;Q9NZ87;Q9NWW3;A4D110	V9HW22;Q53GZ6;P11142;E9PKE3;Q96IS6;B3KTV0;Q53HF2;E9PNE6;E9PN89;B4E1Q1;A8K7Q2	Heat shock cognate 71 kDa protein	HEL-S-72p;HSPA8	30	22	20	20	38.5	70.897	646	216.77	4961700000
Q53XL8;Q53HB3;P62191;G3V4X1	Q53XL8;Q53HB3;P62191	26S protease regulatory subunit 4	PSMC1	4	18	18	18	42.5	49.184	440	181.85	4780600000
F6S8Q4;A0A0D9SFB3;A0A2R8YF78;A0A2R8YCW1;A0A0D9SG12;A0A2R8YFR4;A0A2U3TZJ9;A0A2R8YFS5;B5BTY4;A0A2R8Y4A4;Q59GX6;A0A2R8Y645;A0A0D9SF53;O00571;A0A2R8YDT5;A0A2R8Y7T2;A0A2R8Y5G6;Q5S4N1;A0A2R8YDH3;B4DLU5;A0A024R9A4;O15523;A0A0J9YVQ7;B4E132;A0A087WVZ1;B4E010;B4E3C4;A0A2R8Y4D2;A0A2R8YF89;A0A087WX09;B4DLA0;A0A2R8YCU0;A0A2R8Y650;C9J8G5;C9J081	F6S8Q4;A0A0D9SFB3;A0A2R8YF78;A0A2R8YCW1;A0A0D9SG12;A0A2R8YFR4;A0A2U3TZJ9;A0A2R8YFS5;B5BTY4;A0A2R8Y4A4;Q59GX6;A0A2R8Y645;A0A0D9SF53;O00571;A0A2R8YDT5;A0A2R8Y7T2;A0A2R8Y5G6;Q5S4N1;A0A2R8YDH3;B4DLU5;A0A024R9A4;O15523	ATP-dependent RNA helicase DDX3X;ATP-dependent RNA helicase DDX3Y	DDX3X;DDX3Y	35	17	16	16	31.5	69.355	629	145.88	4672000000
P19474;H0YDP8	P19474	E3 ubiquitin-protein ligase TRIM21	TRIM21	2	14	14	14	35.8	54.169	475	142.96	4565400000
O00231;B4DTS5;J3QRY4;J3QS13	O00231;B4DTS5	26S proteasome non-ATPase regulatory subunit 11	PSMD11	4	16	16	16	38.2	47.463	422	112.55	4257700000
P49411;H3BNU3	P49411	Elongation factor Tu, mitochondrial	TUFM	2	15	15	15	44	49.541	452	120.89	4231900000
Q99460;B2R6D0;A0A087WW66;Q05CW6;Q05BX4;H7C378;C9J9M4;H7BZR6;F8WCE3	Q99460;B2R6D0;A0A087WW66;Q05CW6;Q05BX4	26S proteasome non-ATPase regulatory subunit 1	PSMD1	9	19	19	19	28.4	105.84	953	185.96	4229200000
A0A1X7SBZ2;A0A1W2PQ51;Q59F66;Q92841;B4DZQ7;J3KRZ1;J3QSF1;A0A0U1RQJ0;Q9UQL5	A0A1X7SBZ2;A0A1W2PQ51;Q59F66;Q92841;B4DZQ7	Probable ATP-dependent RNA helicase DDX17	DDX17	9	18	18	12	26.5	80.253	729	147.69	4178400000
E9PCY7;G8JLB6;P31943;D6RIT2;D6RIU0;D6RBM0;E7EQJ0;D6RAM1;E5RGV0;D6R9T0;D6RFM3;D6RDU3;D6RJ04;D6RIH9;E7EN40;D6RF17;D6RDL0;H0YB39;D6R9D3;E5RGH4;B4DP51;H0YBG7;Q68DG4;H0YBD7;E5RJ94;H0YAQ2	E9PCY7;G8JLB6;P31943;D6RIT2;D6RIU0;D6RBM0;E7EQJ0;D6RAM1;E5RGV0;D6R9T0;D6RFM3;D6RDU3;D6RJ04;D6RIH9;E7EN40	Heterogeneous nuclear ribonucleoprotein H;Heterogeneous nuclear ribonucleoprotein H, N-terminally processed	HNRNPH1	26	10	10	5	28.7	47.087	429	78.083	3999900000
Q6IBN0;O43242;B3KNN7;Q96N86;B4DV84;B4DEB0;B4DPM7;Q8N9M2;H0YGV8;O95325	Q6IBN0;O43242;B3KNN7;Q96N86;B4DV84;B4DEB0;B4DPM7;Q8N9M2	26S proteasome non-ATPase regulatory subunit 3	PSMD3	10	18	18	18	40.3	60.945	534	194.93	3989400000
A0A087WZN1;O43837;A0A087X2E5;L0R875;B4DU38;Q99855;A0A0D9SG66;Q9UIC5	A0A087WZN1;O43837;A0A087X2E5;L0R875	Isocitrate dehydrogenase [NAD] subunit, mitochondrial;Isocitrate dehydrogenase [NAD] subunit beta, mitochondrial	IDH3B	8	9	9	9	27.9	42.41	387	67.527	3967600000
B4DPW9;Q53GY0;P13797;A0A0A0MSQ0;Q96HI1;B4DG31;B4DI60;A7E2S2;U3KQI3;H7C4N2;B4DPU6;Q59GX5;V9HWJ7;Q53FI1;A0A024RDT4;P13796;Q5TBN3;C9JAM8;Q14651;F2Z2Z9	B4DPW9;Q53GY0;P13797;A0A0A0MSQ0;Q96HI1;B4DG31	Plastin-3	PLS3	20	21	21	21	42.1	67.599	603	160.51	3931000000
Q76LA1;P04080;A0A1W2PS52;A0A1W2PQG6	Q76LA1;P04080;A0A1W2PS52	Cystatin-B	CSTB	4	5	5	5	76.5	11.139	98	43.17	3897700000
Q53FC7;B3KSM6;B2R6X5;P17066;P48741	Q53FC7;B3KSM6;B2R6X5;P17066;P48741	Heat shock 70 kDa protein 6;Putative heat shock 70 kDa protein 7	HSPA6;HSPA7	5	7	1	1	11	71.003	643	6.8558	3786000000
A0A140VK70;P35998;A0A1W2PQS1;Q75L23;C9JLS9;B7Z571	A0A140VK70;P35998;A0A1W2PQS1;Q75L23	26S protease regulatory subunit 7	PSMC2	6	26	26	26	58.2	48.633	433	205.32	3758300000
A0A024R201;J3KNQ3;Q53GN6;Q9Y6E3;Q9UNM6;B2RBM7;A0A087WUL9;B4DJ66;E9PL38;H0YD73;E9PQG3;Q9UNM7;E9PPD2;Q5HYL3;F8W8J6	A0A024R201;J3KNQ3;Q53GN6;Q9Y6E3;Q9UNM6;B2RBM7;A0A087WUL9;B4DJ66;E9PL38	26S proteasome non-ATPase regulatory subunit 13	PSMD13	15	12	12	12	41.8	42.918	376	103.15	3735600000
B3KT06;B3KPS3;P68363;A8JZY9;P68366;B4DDU2;F8VVB9;F8VQQ4;B4DN58;F8VX09;F8VWV9;F8VRZ4;F8VS66;C9JDS9;C9JEV8;C9JQ00;C9JJQ8;C9K0S6;F8VRK0;Q6QMJ5;Q15670;C9JDL2;F8VXZ7;D3DX41;F8W0F6;Q9H853;A6NHL2	B3KT06;B3KPS3;P68363;A8JZY9;P68366;B4DDU2;F8VVB9	Tubulin alpha-1B chain;Tubulin alpha-4A chain	TUBA1B;TUBA4A	27	13	13	1	42.3	46.341	416	150.2	3627900000
R4GNH3;A0A140VK42;P17980;E9PM69;A8K781;E9PKD5;E9PMD8;E9PN50;E9PLG2	R4GNH3;A0A140VK42;P17980;E9PM69;A8K781;E9PKD5;E9PMD8;E9PN50	26S protease regulatory subunit 6A	PSMC3	9	16	16	16	45.9	47.352	423	130.43	3347500000
Q15008;B3KT66;C9J0E9;C9J7B7;H7C531	Q15008;B3KT66	26S proteasome non-ATPase regulatory subunit 6	PSMD6	5	14	14	14	39.3	45.531	389	142.47	3053100000
A0A024R3X4;P10809;B3GQS7;B7Z5E7;B7Z4F6;B7Z597;B7Z532;Q53SE2;E7ESH4;B9VPB4;B9VP19;E7EXB4;Q53QD5;A0A0S2Z415;C9JL19;C9JCQ4;C9JL25;B9VP24	A0A024R3X4;P10809;B3GQS7;B7Z5E7;B7Z4F6;B7Z597	60 kDa heat shock protein, mitochondrial	HSPD1	18	23	23	23	41.4	61.054	573	170.13	2739000000
P51665;B2RD27;H3BNT7;H3BTM8;B4DXI8;H3BQV2	P51665;B2RD27;H3BNT7;H3BTM8;B4DXI8	26S proteasome non-ATPase regulatory subunit 7	PSMD7	6	10	10	10	44.4	37.025	324	95.383	2393500000
A0A2P9AAP7	A0A2P9AAP7			1	2	2	2	2.4	74.941	696	21.908	2354700000
B4E043;B4DDX2;Q07666;B2R7B5	B4E043;B4DDX2;Q07666;B2R7B5	KH domain-containing, RNA-binding, signal transduction-associated protein 1	KHDRBS1	4	4	4	4	15.6	38.682	347	27.035	2180700000
F8W9L6;F5H006;B4DZV0;A0A024RAY9;A0A1B0GU45;Q12912	F8W9L6;F5H006;B4DZV0;A0A024RAY9;A0A1B0GU45;Q12912	Lymphoid-restricted membrane protein;Processed lymphoid-restricted membrane protein	LRMP	6	1	1	1	2.3	38.995	348	5.5887	2055500000
A0A087X2I1;P62333;V9HW24;H0YJC0;H0YJS8;B4DR91;H0YJX2;H0YJE9;H0YJT1	A0A087X2I1;P62333;V9HW24;H0YJC0	26S protease regulatory subunit 10B	PSMC6;HEL-S-73	9	16	16	16	54.6	45.796	403	124.77	2039500000
Q53HJ4;B2R7C5;A0A0S2Z4T1;P25205;Q8NHX6;B4DUQ9;J3KQ69;A0A0S2Z492;B4DS46;Q7Z6P5	Q53HJ4;B2R7C5;A0A0S2Z4T1;P25205;Q8NHX6;B4DUQ9;J3KQ69;A0A0S2Z492;B4DS46	DNA helicase;DNA replication licensing factor MCM3	MCM3;HCC5	10	16	16	16	22.8	90.98	808	127.71	1994200000
Q59FI2;H0Y6Z7;P10586;H0Y4H1;H0Y7Z9;Q5W9G3;Q7Z3X4;B3KWM1;B3KXA8;H0Y380;B3KXJ7;B4DWI5;B4DK48;Q59H90;Q3KPI9;G8JL96;Q9UM81;F5GWR7;A0A0A0MR60;Q59FX6;Q2HXI4;P23468;Q13332;A8E4L7	Q59FI2;H0Y6Z7;P10586;H0Y4H1;H0Y7Z9;Q5W9G3;Q7Z3X4;B3KWM1;B3KXA8;H0Y380	Receptor-type tyrosine-protein phosphatase F;Protein-tyrosine-phosphatase	PTPRF;LAR;DKFZp686B1310	24	18	18	18	16.2	174.88	1552	146.75	1826600000
A0A0U1RQF0;P49327;Q6PJJ3	A0A0U1RQF0;P49327	Fatty acid synthase;[Acyl-carrier-protein] S-acetyltransferase;[Acyl-carrier-protein] S-malonyltransferase;3-oxoacyl-[acyl-carrier-protein] synthase;3-oxoacyl-[acyl-carrier-protein] reductase;3-hydroxyacyl-[acyl-carrier-protein] dehydratase;Enoyl-[acyl-carrier-protein] reductase;Oleoyl-[acyl-carrier-protein] hydrolase	FASN	3	24	24	24	14.9	273.2	2509	199.42	1771800000
B1AHB0;P33992;Q53FG5;A8K521;B1AHB1;B4DQ39;B3KVF0;B4DVK5;Q59F49;B1AHA9;B1AHB2;F8WFD7;B4DN96;Q17RA1;Q9BWT7;Q9NVE5	B1AHB0;P33992;Q53FG5;A8K521;B1AHB1;B4DQ39;B3KVF0;B4DVK5	DNA helicase;DNA replication licensing factor MCM5	MCM5	16	20	20	20	30.4	82.285	734	152.3	1622200000
V9HWB4;P11021;B4DEF7	V9HWB4;P11021	78 kDa glucose-regulated protein	HEL-S-89n;HSPA5	3	16	16	16	30	72.332	654	132.38	1594800000
Q06830;A0A0A0MSI0;B2R4P2;A0A0A0MRQ5	Q06830;A0A0A0MSI0;B2R4P2;A0A0A0MRQ5	Peroxiredoxin-1	PRDX1	4	9	9	7	56.8	22.11	199	72.706	1512700000
Q5VWC4;P55036;H0Y3Y9;A6PVX3;H0Y561	Q5VWC4;P55036;H0Y3Y9;A6PVX3	26S proteasome non-ATPase regulatory subunit 4	PSMD4	5	4	4	4	11.8	41.079	380	44.13	1463600000
A0A0S2Z410;Q99714;Q5H928;A0A0S2Z434	A0A0S2Z410;Q99714;Q5H928;A0A0S2Z434	3-hydroxyacyl-CoA dehydrogenase type-2	HSD17B10	4	8	8	8	50.2	26.923	261	83.112	1434100000
C9JKR2;H0YA55;D6RHD5;B7WNR0;B4DPR2;F6KPG5;A0A0C4DGB6;A8K9P0;B2RBS8;B4DPP6;P02768;A0A087WWT3;Q56G89	C9JKR2;H0YA55;D6RHD5;B7WNR0;B4DPR2;F6KPG5;A0A0C4DGB6;A8K9P0;B2RBS8;B4DPP6;P02768;A0A087WWT3;Q56G89	Serum albumin	ALB	13	3	3	3	7.4	47.287	417	21.303	1416200000
X5D2J9;Q499G6;X5D939;X5DNP5;B4DH52;X5DR09;P78347;A0A1W6S962;A8K9W7;B4DRA9;X5D7Q9;A0A0A0VEB4	X5D2J9;Q499G6;X5D939;X5DNP5;B4DH52;X5DR09;P78347;A0A1W6S962;A8K9W7;B4DRA9	General transcription factor II-I	GTF2I	12	12	12	12	15.5	107.97	957	90.267	1409700000
V9HW63;Q13162;H7C3T4;A6NJJ0;A6NG45	V9HW63;Q13162;H7C3T4	Peroxiredoxin-4	HEL-S-97n;PRDX4	5	6	5	5	22.9	30.54	271	36.89	1327400000
V9HW65;A0A024R5Z7;P07355;H0YMD0;H0YMU9;H0YN42;H0YKS4;B4DNH8;A6NMY6;H0YMM1;H0YNP5;H0YM50;H0YKZ7;H0YLV6;H0YMT9;H0YKX9;H0YKL9;H0YMW4;B3KRQ1;H0YMD9;H0YKV8;H0YN28;H0YL33;H0YNB8;H0YN52;H0YKN4;H0YNA0;H0YLE2	V9HW65;A0A024R5Z7;P07355;H0YMD0;H0YMU9;H0YN42;H0YKS4;B4DNH8;A6NMY6;H0YMM1;H0YNP5;H0YM50;H0YKZ7;H0YLV6;H0YMT9;H0YKX9	Annexin;Annexin A2;Putative annexin A2-like protein	HEL-S-270;ANXA2;ANXA2P2	28	12	12	12	46	38.576	339	100.69	1308400000
A0A140VKF2;O00487;Q53TH1;Q59G89;Q96DE8;Q4ZG77	A0A140VKF2;O00487;Q53TH1;Q59G89	26S proteasome non-ATPase regulatory subunit 14	PSMD14	6	5	5	5	27.4	34.577	310	44.021	1269600000
H9ZYJ2;P10599	H9ZYJ2;P10599	Thioredoxin	TXN	2	4	4	4	41	11.737	105	27.654	1244700000
P42677;H0YMV8;Q71UM5;C9J1C5;C9JLI6;A4D1G5	P42677;H0YMV8;Q71UM5;C9J1C5;C9JLI6;A4D1G5	40S ribosomal protein S27;40S ribosomal protein S27-like	RPS27;RPS27L;LOC392748	6	4	4	4	47.6	9.461	84	26.446	1237200000	40
A0A024R5K8;P50454;B4DN87;A8K259;E9PJH8;E9PIG2;E9PRS3;E9PNX1;E9PK86;E9PMI5;E9PR70;E9PPV6;E9PQ34;E9PKH2;H0YEP8;E9PLA6;Q9NPA9	A0A024R5K8;P50454;B4DN87;A8K259;E9PJH8;E9PIG2;E9PRS3;E9PNX1;E9PK86;E9PMI5;E9PR70;E9PPV6	Serpin H1	SERPINH1	17	5	5	5	17.9	46.44	418	49.186	1178200000
R4GMR5;V9HW09;P48556;Q5U0B3;B4E2Y4;K7EJR3;K7EJC1;K7ENY6	R4GMR5;V9HW09;P48556;Q5U0B3;B4E2Y4;K7EJR3;K7EJC1	26S proteasome non-ATPase regulatory subunit 8	PSMD8;HEL-S-91n	8	6	6	6	29.6	32.551	287	49.179	1126000000
F8VVM2;Q8NCF7;Q53HC3;B2RE88;A0A024RBE8;A0A024RBH9;Q00325	F8VVM2;Q8NCF7;Q53HC3;B2RE88;A0A024RBE8;A0A024RBH9;Q00325	Phosphate carrier protein, mitochondrial	SLC25A3	7	1	1	1	3.7	36.161	324	7.269	1106400000
Q9HBQ9;A7E261;O14841	Q9HBQ9;A7E261;O14841	5-oxoprolinase	OPLAH	3	1	1	1	2.4	35.676	338	6.0722	905790000
B4DRD7;H3BRU6;F8VZX2;Q15366;F8VXH9;B4DLC0;F8VRH0;F8W0G4;F8W1G6;J3QT27;Q5MJP6;E9PFP8;P57721;H3BND9;H3BSS4;F8VTZ0	B4DRD7;H3BRU6;F8VZX2;Q15366;F8VXH9;B4DLC0;F8VRH0	Poly(rC)-binding protein 2	PCBP2	16	7	7	5	43.3	29.737	282	72.005	861000000
Q96H79	Q96H79	Zinc finger CCCH-type antiviral protein 1-like	ZC3HAV1L	1	3	3	3	13.3	32.962	300	26.957	849940000
F8VRI7;A0A024RBD7;Q9H0E7	F8VRI7;A0A024RBD7;Q9H0E7	Ubiquitinyl hydrolase 1;Ubiquitin carboxyl-terminal hydrolase;Ubiquitin carboxyl-terminal hydrolase 44	USP44	3	1	1	1	3.8	56.509	496	5.7305	815510000
B4DWZ7;B3KTN5;Q9NS86	B4DWZ7;B3KTN5;Q9NS86	LanC-like protein 2	LANCL2	3	6	6	6	19.7	48.884	432	54.296	789720000
B4DKS8;A0A024R7T3;P52597	B4DKS8;A0A024R7T3;P52597	Heterogeneous nuclear ribonucleoprotein F;Heterogeneous nuclear ribonucleoprotein F, N-terminally processed	HNRPF;HNRNPF	3	4	2	2	17.8	37.255	338	26.027	776340000
A0A0S2Z489;O00232;J3KTJ5;J3KSK1;A0A0S2Z476	A0A0S2Z489;O00232	26S proteasome non-ATPase regulatory subunit 12	PSMD12	5	9	9	9	19.5	52.904	456	77.151	748620000
A0A140VK73;Q9NPH2;B3KSG0;B7Z3K3;J3QS51;J3KRH4	A0A140VK73;Q9NPH2;B3KSG0;B7Z3K3;J3QS51	Inositol-3-phosphate synthase 1	ISYNA1	6	10	10	10	22.9	61.067	558	82.251	704100000
A0A1W6IYK3	A0A1W6IYK3			1	1	1	1	9.7	12.221	113	13.598	639050000
B4DMA2;B4DGL0;A0A024RD80;P08238;Q9H6X9;A8K3W9;Q6PK50;Q58FF7;F8W026;O14942;B4DQX3;Q96GW1;A0A1W2PRR1;Q86U12;Q96HX7;O75322;Q59FC6;Q2VPJ6;Q8TBA7;K9JA46;Q5CAQ5;V9HWP2;Q58FF8;P07900;P14625	B4DMA2;B4DGL0;A0A024RD80;P08238;Q9H6X9;A8K3W9	Heat shock protein HSP 90-beta	HSP90AB1	25	6	6	6	10.9	79.194	686	45.997	623150000
A0A024R1A3;P22314;B4DDE4;B4DL67;Q8WY81;Q5JRS1;Q5JRS3;Q5JRS2;Q5JRR9;Q5JRS0;Q5JRR6;B3KUJ2	A0A024R1A3;P22314;B4DDE4;B4DL67	Ubiquitin-like modifier-activating enzyme 1	UBE1;UBA1	12	7	7	7	9.1	117.85	1058	57.104	623090000
A0A024R652;F5H2F4;B7Z809;P11586;V9GYY3	A0A024R652;F5H2F4;B7Z809;P11586	C-1-tetrahydrofolate synthase, cytoplasmic;Methylenetetrahydrofolate dehydrogenase;Methenyltetrahydrofolate cyclohydrolase;Formyltetrahydrofolate synthetase;C-1-tetrahydrofolate synthase, cytoplasmic, N-terminally processed	MTHFD1	5	13	13	13	13.5	101.53	935	89.75	602950000
Q9BSV4;Q86VG2;P23246;Q6PIX2;H0Y9K7	Q9BSV4;Q86VG2;P23246;Q6PIX2	Splicing factor, proline- and glutamine-rich	SFPQ	5	6	5	5	10.1	68.63	634	47.692	576590000
A0A024R588;A0A024R566;B4DJU4;A0A024R5D9;A0A024R572;Q15637;B4DSE4;B4DX42;Q14820;F8WEV5;C9J792	A0A024R588;A0A024R566;B4DJU4;A0A024R5D9;A0A024R572;Q15637;B4DSE4;B4DX42	Splicing factor 1	SF1	11	6	6	6	17.7	59.711	548	54.226	572690000
B4DUT7;Q53F90;A0A140VJK6;P49915	B4DUT7;Q53F90;A0A140VJK6;P49915	GMP synthase [glutamine-hydrolyzing]	GMPS	4	9	9	9	18.2	71.24	642	64.311	555440000
A0A1B0GWJ0;A0A1B0GTJ7;X5D8S6;Q71UA4;B4DP46;A0A0A6YY92;P30566;A0A096LNY6;A0A096LNY5;B4DUM2;X5DP48;X5D2Z4;A0A1B0GTG9;A0A1B0GWF8;A8K4X6;A0A096LP92;A0A096LPA2;X5D7W4;V9GY96;X5D7V4;A0A096LP76;B4DEP1;A0A1W2PRX2;A0A096LP72;A0A096LNY4	A0A1B0GWJ0;A0A1B0GTJ7;X5D8S6;Q71UA4;B4DP46;A0A0A6YY92;P30566;A0A096LNY6;A0A096LNY5;B4DUM2;X5DP48;X5D2Z4;A0A1B0GTG9;A0A1B0GWF8;A8K4X6	Adenylosuccinate lyase	ADSL	25	6	6	6	22.3	54.465	480	42.393	550880000
Q4VCS5;A6NP16;A2BDD9;E7ERM3	Q4VCS5;A6NP16;A2BDD9;E7ERM3	Angiomotin	AMOT	4	6	6	6	7	118.08	1084	43.456	542290000
Q53SS8;Q15365	Q53SS8;Q15365	Poly(rC)-binding protein 1	PCBP1	2	6	4	4	21.9	37.497	356	32.94	535770000
B7Z6P1;A8K3K1;P68133;P68032;Q7Z7J6;A6NL76;D2JYH4;P63267;P62736;Q13707;B3KW67;B4DUI8;F8WB63;B8ZZJ2;C9JFL5;F6UVQ4;F6QUT6;B7Z6I1	B7Z6P1;A8K3K1;P68133;P68032;Q7Z7J6;A6NL76;D2JYH4;P63267;P62736;Q13707;B3KW67;B4DUI8	Actin, alpha skeletal muscle;Actin, alpha cardiac muscle 1;Actin, gamma-enteric smooth muscle;Actin, aortic smooth muscle	ACTA1;ACTC1;ACTA2;ACTG2	18	7	1	1	24.2	38.579	343	5.5335	527140000
V9HW90;P00390;A0A2R8YF59;H0YC68;Q03504	V9HW90;P00390	Glutathione reductase, mitochondrial	HEL-75;GSR	5	6	6	6	14	56.256	522	36.036	525930000
A0A024RDQ0;A0A024RDS1;Q92598;B4DY72;B4DF68;A0A0A0MSM0;B4DZB4;R4GN69;Q5TBM3;B0AZU6;B4DSE8;B4E0H6;B4E354;B4DT47;A0A087WYC1;B4DIZ3;B4DUS3;Q59GF8;E9PDE8;B4DXT2;Q53ZP9;A0A140VKE7;V9HW33;B4DH02;B4DZR0;O95757;P34932	A0A024RDQ0;A0A024RDS1;Q92598;B4DY72;B4DF68;A0A0A0MSM0	Heat shock protein 105 kDa	HSPH1	27	7	7	7	12.4	92.115	814	50.239	501700000
J3KSP2;J3KT73;J3QL01;A0A024R8P8;P63173	J3KSP2;J3KT73;J3QL01;A0A024R8P8;P63173	60S ribosomal protein L38	RPL38	5	1	1	1	61.9	2.559	21	12.652	481600000
Q6FHN3;J3KPD9;Q32Q12;P22392;F6XY72;E7ERL0;O60361;P15531;C9K028;E5RHP0	Q6FHN3;J3KPD9;Q32Q12;P22392;F6XY72;E7ERL0;O60361;P15531	Nucleoside diphosphate kinase;Nucleoside diphosphate kinase B;Putative nucleoside diphosphate kinase;Nucleoside diphosphate kinase A	NME2;NME1-NME2;NME1;NME2P1	10	3	3	3	25.7	17.298	152	24.022	480440000
B4E136;Q6YN16;B2R923;A0A024R159;B4DWC7	B4E136;Q6YN16;B2R923;A0A024R159;B4DWC7	Hydroxysteroid dehydrogenase-like protein 2	HSDL2	5	5	5	5	27.2	33.032	298	52.594	468760000
A8K525;A0A0S2Z4Z9;Q15233;H7C367;C9JYS8;C9IZL7;C9J4X2;A0A0S2Z4E7	A8K525;A0A0S2Z4Z9;Q15233;H7C367;C9JYS8	Non-POU domain-containing octamer-binding protein	NONO	8	10	10	9	19.7	54.287	471	73.611	456340000
P0DN79;P35520;B7Z2D6;C9JMA6;B7Z6W5;Q9NTF0;Q96EH7;H7C2H4	P0DN79;P35520;B7Z2D6;C9JMA6;B7Z6W5;Q9NTF0	Cystathionine beta-synthase	CBS;DKFZp727E011	8	7	7	7	16.5	60.586	551	60.747	417370000
A5D8Z4;D3DUP2;F5GWT4;D3DUP1;Q9H4A3	A5D8Z4;D3DUP2;F5GWT4;D3DUP1;Q9H4A3	Serine/threonine-protein kinase WNK1	WNK1	5	1	1	1	0.7	159.52	1537	5.6644	402580000
Q53HG7;Q14247;A0A024R5M3;Q76MU0;B3KRK4;B4E358;H0YEV2;H0YCD9	Q53HG7;Q14247;A0A024R5M3;Q76MU0	Src substrate cortactin	CTTN;EMS1	8	6	6	6	12.9	61.557	550	41.737	400800000
A0A024R4T4;P61081;M0QX69	A0A024R4T4;P61081	NEDD8-conjugating enzyme Ubc12	UBE2M	3	3	3	3	14.2	20.9	183	19.906	393960000
B4DF70;V9HW12;P32119;A6NIW5;A0A024R7F2	B4DF70;V9HW12;P32119;A6NIW5	Peroxiredoxin-2	HEL-S-2a;PRDX2	5	7	6	6	31.1	20.107	183	45.14	389020000
A0A0S2Z4G7;A0A0S2Z491;P06748;Q9BTI9;A0A140VJQ2;A4ZU86;Q9NX34;A0A024R3V9;E5RI98	A0A0S2Z4G7;A0A0S2Z491;P06748;Q9BTI9;A0A140VJQ2;A4ZU86;Q9NX34	Nucleophosmin	NPM1	9	4	4	4	27.2	29.464	265	42.298	374510000
I3L1P8;Q6IBH0;Q02978	I3L1P8;Q6IBH0;Q02978	Mitochondrial 2-oxoglutarate/malate carrier protein	SLC25A11	3	1	1	1	5.4	32.182	296	10.266	366290000
Q6P2Q9;B4DK16;I3L3Z8;I3L1T8;Q53GM6;Q6JH02;Q6JH03;I3L0J9	Q6P2Q9;B4DK16	Pre-mRNA-processing-splicing factor 8	PRPF8	8	7	7	7	4.5	273.6	2335	47.095	352960000
A0A024R1Y2;A0A024R1T9;Q4LE36;P53396;Q8N9C4;K7ESG8	A0A024R1Y2;A0A024R1T9;Q4LE36;P53396;Q8N9C4	ATP-citrate synthase	ACLY;ACLY variant protein	6	4	4	4	6	119.77	1091	31.52	349010000
Q07021;I3L3Q7;I3L3B0;A8K651	Q07021;I3L3Q7;I3L3B0;A8K651	Complement component 1 Q subcomponent-binding protein, mitochondrial	C1QBP	4	2	2	2	14.2	31.362	282	22.006	342770000
E9PF10;A0A024R071;O75694;B4DLT2;B3KMK3;D6RA13	E9PF10;A0A024R071;O75694;B4DLT2	Nuclear pore complex protein Nup155	NUP155	6	7	7	7	7.3	148.09	1327	65.351	341010000
P27348;B4DY04;Q53S41;B4DMT8;E9PG15;Q3YBA8;Q53RR5	P27348;B4DY04;Q53S41;B4DMT8	14-3-3 protein theta	YWHAQ	7	5	5	3	20	27.764	245	32.733	337630000
A0A024RCX8;Q9Y3C6	A0A024RCX8;Q9Y3C6	Peptidyl-prolyl cis-trans isomerase;Peptidyl-prolyl cis-trans isomerase-like 1	PPIL1	2	2	2	2	16.3	18.237	166	14.478	336880000
Q53YD7;P26641;B4DUP0;B4DUK7;Q2F838;B4DSR4	Q53YD7;P26641	Elongation factor 1-gamma	EEF1G	6	9	9	9	22.9	50.118	437	60.26	332970000
G3V4C6;Q5RLJ0;Q549M8;Q9Y224;H0YJB9;G3V4E7	G3V4C6;Q5RLJ0;Q549M8;Q9Y224;H0YJB9	UPF0568 protein C14orf166	C14orf166	6	3	3	3	20.7	22.703	193	25.767	331990000
P30048;A4UCS5;Q53HC2	P30048;A4UCS5;Q53HC2	Thioredoxin-dependent peroxide reductase, mitochondrial	PRDX3	3	4	4	4	23.4	27.692	256	26.617	329360000
Q6EHZ0;Q9H2N1;Q6ZP91	Q6EHZ0;Q9H2N1;Q6ZP91		STRF6	3	1	1	1	28	9.5579	82	5.5571	328600000
A0A024R5N4;F5H0C4;Q9BRP4;F5H0F7;F5H103;F5H3I1;F5H3E9;H0YGB1;F5H5D4	A0A024R5N4;F5H0C4;Q9BRP4;F5H0F7	Proteasomal ATPase-associated factor 1	WDR71;PAAF1	9	6	6	6	13.3	40.439	375	46.116	318030000
Q1RMG2;P23526	Q1RMG2;P23526	Adenosylhomocysteinase	AHCY	2	2	2	2	8.2	33.811	306	13.06	314340000
H7BY36;A0A0D9SFL3;B0QYK0;C9JGE3;Q01844	H7BY36;A0A0D9SFL3;B0QYK0;C9JGE3;Q01844	RNA-binding protein EWS	EWSR1	5	3	3	3	14.3	32.071	308	22.364	310820000
D3DW38;H7C1F9;Q2PPJ7	D3DW38;H7C1F9;Q2PPJ7	Ral GTPase-activating protein subunit alpha-2	hCG_22457;RALGAPA2	3	1	1	1	0.9	113.27	1015	5.568	310730000
F8VYH9;F8VTV8;F8VWX7;A0A024RBB6;P11802;Q96BE9;F8W1L8;F8VYY1;F8VXD2;F8VZZ0;F8VZ51;Q6LC83	F8VYH9;F8VTV8;F8VWX7;A0A024RBB6;P11802;Q96BE9;F8W1L8	Cyclin-dependent kinase 4	CDK4	12	3	3	3	21.8	18.685	170	24.21	305310000
J3QT28;A0A140VJF3;O43684;J3QSX4;B4DDM6	J3QT28;A0A140VJF3;O43684;J3QSX4;B4DDM6	Mitotic checkpoint protein BUB3	BUB3	5	6	6	6	25.5	31.703	278	49.278	302900000
V9HW96;P78371;Q9H369;B7Z4R3;F5GWF6;F8VQ14	V9HW96;P78371;Q9H369;B7Z4R3;F5GWF6;F8VQ14	T-complex protein 1 subunit beta	HEL-S-100n;CCT2	6	4	4	4	12.1	57.488	535	28.81	300620000
F5H365;B4DSQ5;Q15436;B4DF60;B4E0Q9;G3V5X8;G3V4Q2;G3V4V1;G3V1W4;G3V3G5;G3V2R6	F5H365;B4DSQ5;Q15436;B4DF60;B4E0Q9	Protein transport protein Sec23A	SEC23A	11	4	4	4	6.2	82.968	736	25.604	298420000
B2RD24;A0A087WVM4;B7ZM99;Q6UB35;H0Y327;Q4VXM1;Q4VXM0	B2RD24;A0A087WVM4;B7ZM99;Q6UB35	Monofunctional C1-tetrahydrofolate synthase, mitochondrial	MTHFD1L	7	7	7	7	16.1	79.638	733	58.213	297240000
A0A024RBE7;P42167;H0YJH7;A0A024RBH7;Q59G12;G5E972;P42166	A0A024RBE7;P42167	Lamina-associated polypeptide 2, isoforms beta/gamma;Thymopoietin;Thymopentin	TMPO	7	4	4	4	12.6	50.67	454	47.743	288120000
B3KT34;A0A024QZ30;P31040;A0A087X1I3;Q0QF12;B3KYA5;D6RFM5;B4DYN5;H0Y8X1	B3KT34;A0A024QZ30;P31040;A0A087X1I3;Q0QF12;B3KYA5;D6RFM5;B4DYN5	Succinate dehydrogenase [ubiquinone] flavoprotein subunit, mitochondrial	SDHA	9	5	5	5	13	48.157	439	36.422	287090000
B4DUR8;B3KX11;Q2TU64;Q59H77;P49368	B4DUR8;B3KX11;Q2TU64;Q59H77;P49368	T-complex protein 1 subunit gamma	CCT3	5	3	3	3	9.4	55.674	500	18.92	276570000
B2RBA6;A0A0S2Z4A5;P33993;Q9H4N9;B3KUD7;B4DDF5;C6EMX8;A0A0S2Z441	B2RBA6;A0A0S2Z4A5;P33993;Q9H4N9;B3KUD7;B4DDF5;C6EMX8	DNA helicase;DNA replication licensing factor MCM7	MCM7	8	5	5	5	10	81.279	719	38.069	274430000
Q6LAP8;D9HTE9;P53007;B4DP62	Q6LAP8;D9HTE9;P53007;B4DP62	Tricarboxylate transport protein, mitochondrial	SLC25A1	4	2	2	2	5.7	34.787	318	13.447	272370000
P17812;B4E1E0;B7Z9C4;B4DMB5;A0A024RC00;Q9NRF8	P17812;B4E1E0	CTP synthase 1;CTP synthase	CTPS1	6	5	5	5	13.9	66.69	591	37.792	266690000
A3RJH1;Q92499;F1T0B3;A0A087X2G1;B4DP70	A3RJH1;Q92499;F1T0B3;A0A087X2G1;B4DP70	ATP-dependent RNA helicase DDX1	DDX1	5	6	6	6	12.6	82.431	740	51.896	262950000
A5PLK7;A0A024RAC5;Q9P258	A5PLK7;A0A024RAC5;Q9P258	Protein RCC2	RCC2	3	6	6	6	15.8	49.678	457	44.841	261410000
Q6P9C2;B2RAL9;Q99956;Q8N4A4;P78512	Q6P9C2;B2RAL9;Q99956;Q8N4A4	Dual specificity protein phosphatase;Dual specificity protein phosphatase 9	DUSP9	5	5	5	5	17.4	41.934	384	43.65	257370000
P17987;F5H136;E7ERF2;F5H7Y1;F5H726;F5GZI8;F5H676;F5H282;E7EQR6	P17987;F5H136;E7ERF2	T-complex protein 1 subunit alpha	TCP1	9	3	3	3	7.4	60.343	556	19.956	250870000
B7Z9L0;B7Z2Z8;A8K3C3;P50991;B7Z2F4	B7Z9L0;B7Z2Z8;A8K3C3;P50991;B7Z2F4	T-complex protein 1 subunit delta	CCT4	5	4	4	4	9.5	52.33	483	30.332	247560000
A0A0C4DGV3;A0A024R048;B7Z8V7;Q4G0N4	A0A0C4DGV3;A0A024R048;B7Z8V7;Q4G0N4	NAD kinase 2, mitochondrial	NADK2;FLJ30596	4	1	1	1	5.7	28.255	247	8.4273	246330000
Q9Y3I0;B4DNA0	Q9Y3I0;B4DNA0	tRNA-splicing ligase RtcB homolog	RTCB	2	4	4	4	11.3	55.21	505	26.287	238440000
Q9Y383;B3KSL5;A0A0A6YYJ8;B3KRR1;B8ZZ10;A8MYV2;D3DU41;Q1W6G4;Q9NQ29;Q75M91;V9GZ75;F8WEU3;B3KSP8;Q53G47	Q9Y383;B3KSL5;A0A0A6YYJ8;B3KRR1	Putative RNA-binding protein Luc7-like 2	LUC7L2	14	6	6	6	19.1	46.513	392	70.154	237710000
Q8IZ29;Q8IWP6;P68371;Q8N6N5;B3KML9;Q96HX0;A4UCT2;B4DNW1	Q8IZ29;Q8IWP6;P68371;Q8N6N5;B3KML9;Q96HX0	Tubulin beta-4B chain	TUBB2C;TUBB4B	8	17	3	1	46.7	49.839	445	27.341	235930000
A0A090N7X1;A0A090N7Y2;Q9UG63	A0A090N7X1;A0A090N7Y2;Q9UG63	ATP-binding cassette sub-family F member 2	ABCF2	3	5	5	5	9.6	71.289	623	34.163	235720000
V9HW26;P25705;K7EJP1;B4DGW3;K7ENJ4;K7ERX7;K7EK77;A0A2P9ARL3	V9HW26;P25705;K7EJP1;B4DGW3;K7ENJ4;K7ERX7;K7EK77;A0A2P9ARL3	ATP synthase subunit alpha;ATP synthase subunit alpha, mitochondrial	HEL-S-123m;ATP5A1	8	2	2	2	5.1	59.75	553	21.688	233960000
B4DN41;J3KTA4;B5BUE6;P17844;Q7Z2V5;Q59E92;B4DNG2;J3QRQ7;J3QRN5;X6RLV5;J3QR02;J3KRX8;J3KTQ4;C1IK54	B4DN41;J3KTA4;B5BUE6;P17844;Q7Z2V5;Q59E92;B4DNG2	Probable ATP-dependent RNA helicase DDX5	DDX5;DKFZp686J01190	14	9	3	3	16.3	67.762	603	22.562	227100000
E9PRQ7;A0A024R598;Q04323;B4E0P8;A0A087WTZ5;E9PJ81;A0A024R539;B4DU88;B4DNC6	E9PRQ7;A0A024R598;Q04323;B4E0P8;A0A087WTZ5;E9PJ81;A0A024R539	UBX domain-containing protein 1	UBXN1;LOC51035	9	4	4	4	33.4	32.913	293	34.528	217060000
Q96FS1;Q68DU0;C9JZR2;O60716;Q7KZJ3;A0A024R4Z0;A0A024R4Y7;E9PKY0;E9PRE2	Q96FS1;Q68DU0;C9JZR2;O60716;Q7KZJ3;A0A024R4Z0;A0A024R4Y7	Catenin delta-1	CTNND1;DKFZp781O2021	9	6	6	6	10.4	92.387	830	82.805	214480000
Q6ZVL3;B4E244;B3KY47;A0A2R8Y5P9;Q8TF72	Q6ZVL3;B4E244;B3KY47;A0A2R8Y5P9;Q8TF72	Protein Shroom3	SHROOM3	5	1	1	1	1.1	87.857	809	5.7702	210330000
Q6DEN2;A0A140VK07;Q8IXW6;Q14195;B4DLZ4;H0YBT4	Q6DEN2;A0A140VK07;Q8IXW6;Q14195	Dihydropyrimidinase-related protein 3	DPYSL3	6	7	7	7	12.3	73.909	684	47.177	209680000
B4DW30;X6R2L4;Q9Y230;M0QXI6;M0R0Y3;B3KNL2	B4DW30;X6R2L4;Q9Y230;M0QXI6;M0R0Y3;B3KNL2	RuvB-like 2	RUVBL2	6	2	2	2	9.8	27.29	255	16.218	199170000
A0A2U3TZY2;A0A140VK11;H0YGM0;Q9H078;Q7Z777;F5H392;A0A2R8Y6R5	A0A2U3TZY2;A0A140VK11;H0YGM0;Q9H078;Q7Z777	Caseinolytic peptidase B protein homolog	CLPB	7	3	3	0	5.6	76.852	692	23.282	197370000
Q9NQX4	Q9NQX4	Unconventional myosin-Vc	MYO5C	1	1	1	1	0.5	202.81	1742	5.7965	196870000
D0PNI1;E7EX29;P63104;B7Z2E6;H0YB80;B0AZS6;E5RGE1;Q6LD62;E5RIR4;E9PD24;E7EVZ2;E7ESK7	D0PNI1;E7EX29;P63104;B7Z2E6;H0YB80;B0AZS6	14-3-3 protein zeta/delta	YWHAZ	12	4	2	2	12.7	27.745	245	13.63	196750000
H0Y2W2;Q9NVI7;Q5SV16;Q8N3E6;Q9H834;Q96T67;Q5T9A4	H0Y2W2;Q9NVI7	ATPase family AAA domain-containing protein 3A	ATAD3A	7	3	3	3	6.6	64.243	572	25.483	193730000
B4E3I0;C9J813;Q9NYG1;B4DPW5;E9PGZ1;A0A140VKA0;B7Z6G4;E7EX44;Q05682;Q7Z2Y9	B4E3I0;C9J813;Q9NYG1;B4DPW5;E9PGZ1;A0A140VKA0;B7Z6G4;E7EX44;Q05682;Q7Z2Y9	Caldesmon	CALD1;DKFZp686P03208	10	2	2	2	9.6	35.381	312	15.474	191060000
M0R0I3;Q9UQD4;Q6FGM0;Q99961;B7Z7W3;Q3V639;Q8IZ09;B7Z7M7;D3DRJ2;B7Z1K6;Q99962;M0QYE0;Q3V638;Q7Z376	M0R0I3;Q9UQD4;Q6FGM0;Q99961;B7Z7W3;Q3V639;Q8IZ09;B7Z7M7;D3DRJ2;B7Z1K6;Q99962;M0QYE0;Q3V638;Q7Z376	Endophilin-A2;Endophilin-A1	SH3GL1;SH3GL2;DKFZp686B23205	14	4	4	4	20.9	15.752	139	27.338	188030000
K7ER44;K7EPP7;K7ESP1;K7EIH8;B7Z9W6;Q59EH7;A8K4T2;Q99615;K7EJL5;K7EN19;K7EJV7;K7EJE9;K7EK03;K7ELJ8;B4DKK3	K7ER44;K7EPP7;K7ESP1;K7EIH8;B7Z9W6;Q59EH7;A8K4T2;Q99615;K7EJL5;K7EN19;K7EJV7;K7EJE9;K7EK03;K7ELJ8;B4DKK3	DnaJ homolog subfamily C member 7	DNAJC7	15	4	4	4	25.8	14.682	128	25.422	185330000
B4DSN3;G5EA31;A0A024QZM6;P53992;B7ZAY6	B4DSN3;G5EA31;A0A024QZM6;P53992	Protein transport protein Sec24C	SEC24C	5	3	3	3	4.8	106.56	975	24.732	184860000
Q16186;B4DMP7;Q68E00;A0A087WX59	Q16186;B4DMP7;Q68E00;A0A087WX59	Proteasomal ubiquitin receptor ADRM1	ADRM1;DKFZp686G2045	4	2	2	2	6.1	42.153	407	16.102	181920000
B5BUB1;Q9Y265;J3QLR1;H7C4G5;E7ETR0;B3KRS7;H7C4I3	B5BUB1;Q9Y265	RuvB-like 1	RUVBL1	7	5	5	5	16.7	50.215	456	53.157	180940000
B4DNN4;Q53GZ5;P23921;B4DXD1;E9PL69;B4DXB0;B4DS95;B4E0I8	B4DNN4;Q53GZ5;P23921;B4DXD1;E9PL69;B4DXB0;B4DS95;B4E0I8	Ribonucleoside-diphosphate reductase;Ribonucleoside-diphosphate reductase large subunit	RRM1	8	3	3	3	4.3	86.451	762	17.555	180230000
O95831;Q5RZ99;Q5RZA0	O95831;Q5RZ99;Q5RZA0	Apoptosis-inducing factor 1, mitochondrial	AIFM1	3	3	3	3	6.9	66.9	613	22.202	176830000
A0A2P9ATY7	A0A2P9ATY7			1	1	1	1	1.7	53.723	473	5.6671	170470000
J3QS39;J3QTR3;F5H6Q2;Q3MIH3;F5GYU3;F5H2Z3;A0A248RGE3;F5H265;Q5UGI3;B4DV12;F5H388;Q5RKT7;B2RDW1;F5H747;F5GXK7;J3QKN0;Q5U5U6;Q5PY61;Q9UFQ0;Q96C32;Q96MH4;L8B4I8;L8B196;Q96H31;L8B4R0;A8K674;L8B4Z6;L8B4M0;L8B4J3;Q66K58;Q59EM9;P62987;P62979;P0CG47;P0CG48;J3QSA3;F5GZ39;M0R1V7;Q49A90;M0R1M6;M0R2S1;A0A2R8Y422;Q8WYN9	J3QS39;J3QTR3;F5H6Q2;Q3MIH3;F5GYU3;F5H2Z3;A0A248RGE3;F5H265;Q5UGI3;B4DV12;F5H388;Q5RKT7;B2RDW1;F5H747;F5GXK7;J3QKN0;Q5U5U6;Q5PY61;Q9UFQ0;Q96C32;Q96MH4;L8B4I8;L8B196;Q96H31;L8B4R0;A8K674;L8B4Z6;L8B4M0;L8B4J3;Q66K58;Q59EM9;P62987;P62979;P0CG47;P0CG48;J3QSA3;F5GZ39;M0R1V7;Q49A90;M0R1M6;M0R2S1;A0A2R8Y422	Ubiquitin-60S ribosomal protein L40;Ubiquitin;60S ribosomal protein L40;Ubiquitin-40S ribosomal protein S27a;Ubiquitin;40S ribosomal protein S27a;Polyubiquitin-B;Ubiquitin;Polyubiquitin-C;Ubiquitin	UBB;RPS27A;UBC;UBA52;HEL112;DKFZp434K0435;UbC	43	3	3	3	40.9	10.469	93	22.157	168470000
P62269;A0A0G2JQH2;Q5GGW2;J3JS69	P62269	40S ribosomal protein S18	RPS18	4	3	3	3	17.1	17.718	152	19.253	167410000
Q546R4;Q9H2T7	Q546R4;Q9H2T7	Ran-binding protein 17	RANBP17	2	1	1	1	0.8	124.37	1088	5.5996	159070000
E9PBS1;A0A024RD93;P22234;B4DGX3;D6RF62	E9PBS1;A0A024RD93;P22234;B4DGX3;D6RF62	Multifunctional protein ADE2;Phosphoribosylaminoimidazole-succinocarboxamide synthase;Phosphoribosylaminoimidazole carboxylase	PAICS	5	2	2	2	5.8	45.651	413	16.656	156670000
H3BTN5;V9HWB8;A0A024R5Z9;P14618;H3BT25;H3BUW1;H3BTJ2;H3BQ34;A0A024R609;B4DRT3;Q8WUW7;Q504U3;H3BR70;B4DNK4	H3BTN5;V9HWB8;A0A024R5Z9;P14618;H3BT25;H3BUW1;H3BTJ2;H3BQ34;A0A024R609;B4DRT3	Pyruvate kinase;Pyruvate kinase PKM	PKM;HEL-S-30;PKM2	14	3	3	3	11.5	53.045	485	21.12	155730000
A0A024DAK3;Q59EC0;P55265;D3DV75;B7Z8Y3;H0YCK3	A0A024DAK3;Q59EC0;P55265;D3DV75;B7Z8Y3;H0YCK3	Double-stranded RNA-specific adenosine deaminase	ADAR	6	4	4	4	4.2	136	1226	25.43	154640000
M0R0F0;Q53G25;A0A024R4Q8;M0R0R2;P46782;M0QZN2;Q59EK8	M0R0F0;Q53G25;A0A024R4Q8;M0R0R2;P46782;M0QZN2	40S ribosomal protein S5;40S ribosomal protein S5, N-terminally processed	RPS5	7	6	6	6	25.5	22.391	200	39.025	153390000
Q53SY7;F8VPD4;P27708;H7C2E4	Q53SY7;F8VPD4;P27708;H7C2E4	CAD protein;Glutamine-dependent carbamoyl-phosphate synthase;Aspartate carbamoyltransferase;Dihydroorotase	CAD	4	2	2	2	1.1	235.18	2151	12.871	152410000
Q8IV96;B2R858;P26196	Q8IV96;B2R858;P26196	Probable ATP-dependent RNA helicase DDX6	DDX6	3	1	1	1	12.8	20.426	187	9.2838	151050000
E9PQD7;Q6IPX5;Q3KQT6;P15880;H0YEN5;E9PMM9;Q8J014;Q8N5L9;Q9BSW5;I3L404;E9PM36;O60249;Q8NI62;D3DU83;E9PPT0;Q8NI61	E9PQD7;Q6IPX5;Q3KQT6;P15880;H0YEN5;E9PMM9;Q8J014;Q8N5L9;Q9BSW5;I3L404;E9PM36	40S ribosomal protein S2	RPS2;rps2	16	4	4	4	17	25.211	235	27.321	148120000
Q9UG64;B3KQ85;B4DM90;Q96CP5;B3KM34;A8K1E9;G3V0E4;O75439	Q9UG64;B3KQ85;B4DM90;Q96CP5;B3KM34;A8K1E9;G3V0E4;O75439	Mitochondrial-processing peptidase subunit beta	DKFZp586I1223;PMPCB	8	2	2	2	12.3	35.188	316	12.03	147170000
B7Z1N5;B3KNQ8;B3KSY7;B3KV59;B7Z1Q9;M0R116;B7Z3F8;A0A2R8YEY8;Q53ES0;B7Z3V1;B7Z9V4;A0A0A0MT26;P13637;P05023;B3KX35;B4E0R9;H0Y7C1;B4DIQ8;B3KW93;B3KRI1;Q658V6;B1AKY9;B2RAQ4;A0A0S2Z3W6;Q53FM3;P50993;Q13733;P20648;P54707	B7Z1N5;B3KNQ8;B3KSY7;B3KV59;B7Z1Q9;M0R116;B7Z3F8;A0A2R8YEY8;Q53ES0;B7Z3V1;B7Z9V4;A0A0A0MT26;P13637;P05023;B3KX35;B4E0R9;H0Y7C1;B4DIQ8;B3KW93;B3KRI1;Q658V6;B1AKY9;B2RAQ4;A0A0S2Z3W6;Q53FM3;P50993;Q13733;P20648;P54707	Sodium/potassium-transporting ATPase subunit alpha-3;Sodium/potassium-transporting ATPase subunit alpha-1;Sodium/potassium-transporting ATPase subunit alpha-2;Sodium/potassium-transporting ATPase subunit alpha-4;Potassium-transporting ATPase alpha chain 1;Potassium-transporting ATPase alpha chain 2	ATP1A3;ATP1A1;ATP1A2;DKFZp666G172;ATP1A4;ATP4A;ATP12A	29	2	2	2	5.9	44.628	405	15.226	144570000
B2R8R5;Q13263;M0R2I3;M0R3C0;M0R0K9	B2R8R5;Q13263;M0R2I3;M0R3C0;M0R0K9	Transcription intermediary factor 1-beta	TRIM28	5	2	2	2	3.4	88.559	835	18.924	139710000
F5H6Z0;B4DGP5;A0A024RBH0;Q00537;B7Z461;Q6ZMU4;E5RGN0;Q96GA5;Q9BRL4;A0A087WZU2;A0A140VK97;A0A024R183;Q59FJ5;B7Z8T0;Q00536;H0YBX5;D6RA44;E5RJM2;A0A0A0MSJ6;B4DHU6;B4DER5;Q59G02;A0A024R996;B4DK03;A0A024R980;Q07002	F5H6Z0;B4DGP5;A0A024RBH0;Q00537;B7Z461;Q6ZMU4;E5RGN0;Q96GA5;Q9BRL4;A0A087WZU2;A0A140VK97;A0A024R183;Q59FJ5;B7Z8T0;Q00536	Cyclin-dependent kinase 17;Cyclin-dependent kinase 16	CDK17;PCTK2;CDK16;PCTK1	26	5	5	5	13.6	53.533	470	34.151	139660000
B3KSU9;G5E9D5;B3KT00;B4DT15;A0A0S2Z5M8;Q9BQ52;H7C2I4;B4E365;E7ES68	B3KSU9;G5E9D5;B3KT00;B4DT15;A0A0S2Z5M8;Q9BQ52;H7C2I4;B4E365;E7ES68	Zinc phosphodiesterase ELAC protein 2	ELAC2	9	2	2	2	4.8	65.374	586	12.188	138910000
B3KQV6;Q8NB89;B4DE69;B4DQY1;B4DDF7;A8K7B7;A8K3H8;P30153;E9PH38;B4E1Q0;C9J9C1	B3KQV6;Q8NB89;B4DE69;B4DQY1;B4DDF7;A8K7B7;A8K3H8;P30153;E9PH38;B4E1Q0;C9J9C1	Serine/threonine-protein phosphatase 2A 65 kDa regulatory subunit A alpha isoform	PPP2R1A	11	2	2	2	9.5	45.604	410	16.071	137240000
Q8IXJ3;B4DZB1;B3KX19;Q6IBM8;A8KAP3;Q15029;K7EP67;B3KWY2;K7EJ74	Q8IXJ3;B4DZB1;B3KX19;Q6IBM8;A8KAP3;Q15029;K7EP67;B3KWY2	116 kDa U5 small nuclear ribonucleoprotein component	SNRP116;U5-116KD;EFTUD2	9	6	5	5	7.9	95.371	850	33.008	135260000
C9J386;H0YFX9;B4E0B3;C9J0D1;A3KPC7;A0A024RAS2;Q08AJ9;B2R5B6;B2R5B3;A4FTV9;A0A024R017;A0A0U1RR32;A0A0U1RRH7;Q99878;Q96KK5;Q71UI9;P0C0S5;Q9BTM1;Q16777;Q93077;Q7L7L0;Q6FI13;P20671;P0C0S8;P04908;Q96QV6;P16104	C9J386;H0YFX9;B4E0B3;C9J0D1;A3KPC7;A0A024RAS2;Q08AJ9;B2R5B6;B2R5B3;A4FTV9;A0A024R017;A0A0U1RR32;A0A0U1RRH7;Q99878;Q96KK5;Q71UI9;P0C0S5;Q9BTM1;Q16777;Q93077;Q7L7L0;Q6FI13;P20671;P0C0S8;P04908;Q96QV6;P16104	Histone H2A;Histone H2A type 1-J;Histone H2A type 1-H;Histone H2A.V;Histone H2A.Z;Histone H2A.J;Histone H2A type 2-C;Histone H2A type 1-C;Histone H2A type 3;Histone H2A type 2-A;Histone H2A type 1-D;Histone H2A type 1;Histone H2A type 1-B/E;Histone H2A type 1-A;Histone H2AX	H2AFV;H2AFJ;HIST1H2AH;HIST1H2AB;HIST1H2AK;HIST1H2AC;HIST1H2AJ;H2AFZ;HIST2H2AC;HIST3H2A;HIST2H2AA3;HIST1H2AD;HIST1H2AG;HIST1H2AA;H2AFX	27	1	1	1	9.2	8.0122	76	5.5556	134510000
B4DH46;P61962	B4DH46;P61962	DDB1- and CUL4-associated factor 7	DCAF7	2	2	2	2	15.9	19.155	164	17.184	132390000
Q8N395;J3KS31;B4DQT7;J3QRS9;Q59G94;X6R4W8;O43670	Q8N395;J3KS31;B4DQT7;J3QRS9;Q59G94;X6R4W8;O43670	BUB3-interacting and GLEBS motif-containing protein ZNF207	DKFZp761N202;ZNF207	7	1	1	1	5.9	34.987	340	6.484	131860000
H7C286;C9JEV6;Q9UJ70;E9PPU6;H7C3G9;H0YC94;H0YEB7	H7C286;C9JEV6;Q9UJ70;E9PPU6;H7C3G9	N-acetyl-D-glucosamine kinase	NAGK	7	3	3	3	26	21.977	196	22.934	129350000
A8K0T9;A0A024R0E5;P52907;B4DE01;Q53GE2;Q53GC7;A4D0V4;P47755	A8K0T9;A0A024R0E5;P52907;B4DE01;Q53GE2;Q53GC7;A4D0V4;P47755	F-actin-capping protein subunit alpha-1;F-actin-capping protein subunit alpha-2	CAPZA1;CAPZA2	8	2	2	2	8.7	32.908	286	10.926	127570000
Q4VB24;B2R984;A3R0T8;A3R0T7;P16403;P10412;P16402	Q4VB24;B2R984;A3R0T8;A3R0T7;P16403;P10412;P16402	Histone H1.2;Histone H1.4;Histone H1.3	HIST1H1E;HIST1H1C;HIST1H1D	7	1	1	1	4.6	21.893	219	6.0078	127320000
B4E0S6;O43143	B4E0S6;O43143	Pre-mRNA-splicing factor ATP-dependent RNA helicase DHX15	DHX15	2	1	1	1	1.3	89.546	784	6.418	126060000
A0MNN4;Q2TAY7	A0MNN4;Q2TAY7	WD40 repeat-containing protein SMU1;WD40 repeat-containing protein SMU1, N-terminally processed	SMU1	2	4	4	4	8.8	57.543	513	29.123	124660000
P55795;B4DFK9;B4DP00	P55795;B4DFK9;B4DP00	Heterogeneous nuclear ribonucleoprotein H2	HNRNPH2	3	6	2	2	18.9	49.263	449	23.101	124560000
B4DN39;A1JUI8;B4DPJ8;Q59ET3;B2R9K8;A0A024RDL1;P40227	B4DN39;A1JUI8;B4DPJ8;Q59ET3;B2R9K8;A0A024RDL1;P40227	T-complex protein 1 subunit zeta	CCT6A	7	2	2	2	5.4	42.914	389	13.643	124150000
A0A140VK29;Q9HCC0;A0A0G2JM88;D6RD67;D6R9R1;D6RDF7;A0A0S2Z5R4	A0A140VK29;Q9HCC0;A0A0G2JM88;D6RD67;D6R9R1;D6RDF7;A0A0S2Z5R4	Methylcrotonoyl-CoA carboxylase beta chain, mitochondrial	MCCC2	7	2	2	2	4.8	61.332	563	18.118	123800000
A0A2X0SSK2;Q96N67;B3KRG0;B4DSH0;A0A1B0GWE0	A0A2X0SSK2;Q96N67;B3KRG0;B4DSH0;A0A1B0GWE0	Dedicator of cytokinesis protein 7	DOCK7	5	2	2	2	1.1	198.46	1749	16.279	122810000
A0A024RCA7;P05387;H0YDD8	A0A024RCA7;P05387;H0YDD8	60S acidic ribosomal protein P2	RPLP2	3	2	2	2	27	11.665	115	14.769	122710000
B1ALA9;Q53FW2;A0A2R8Y7H4;P60891;B2R860;A0A0B4J207;A0A140VK41;P21108;P11908;B7ZB02;A6NMS2;B1ALA7;H7C540;D3YTJ7	B1ALA9;Q53FW2;A0A2R8Y7H4;P60891;B2R860;A0A0B4J207;A0A140VK41;P21108;P11908	Ribose-phosphate pyrophosphokinase 1;Ribose-phosphate pyrophosphokinase 3;Ribose-phosphate pyrophosphokinase 2	PRPS1;PRPS1L1;PRPS2	14	3	3	3	14.7	31.392	285	27.754	121690000
Q6FGH9;Q96FJ2;P63167	Q6FGH9;Q96FJ2;P63167	Dynein light chain 2, cytoplasmic;Dynein light chain 1, cytoplasmic	DNCL1;DYNLL2;DYNLL1	3	2	2	2	24.7	10.366	89	12.048	120720000
H0Y4R1;P12268;Q6RUP8;B7Z1G4	H0Y4R1;P12268;Q6RUP8;B7Z1G4	Inosine-5-monophosphate dehydrogenase 2	IMPDH2	4	2	2	2	6.2	50.957	470	17.013	119930000
V9HW98;G9K389;G9K388;P62258;B7ZA86;B4DJF2;I3L3T1;K7EIT4;K7EM20;B3KT37;B4DJB0	V9HW98;G9K389;G9K388;P62258;B7ZA86	14-3-3 protein epsilon	HEL2;YWHAE/FAM22B fusion;YWHAE/FAM22A fusion;YWHAE	11	3	3	3	12.5	29.174	255	18.055	119560000
E5RH77;A0A2R8Y811;P62263	E5RH77;A0A2R8Y811;P62263	40S ribosomal protein S14	RPS14	3	1	1	1	8.2	14.295	134	6.7679	119250000
Q86YZ3	Q86YZ3	Hornerin	HRNR	1	1	1	1	1.7	282.39	2850	9.5987	117500000
H0YMM5;H0YNJ9;H0YNW5;H0YKC5;H0YKI0;P33316;A0A0C4DGL3	H0YMM5;H0YNJ9;H0YNW5;H0YKC5;H0YKI0;P33316;A0A0C4DGL3	Deoxyuridine 5-triphosphate nucleotidohydrolase, mitochondrial	DUT	7	2	2	2	16.5	14.306	133	12.655	116590000
P36551;H0YA22	P36551;H0YA22	Oxygen-dependent coproporphyrinogen-III oxidase, mitochondrial	CPOX	2	2	2	2	5.3	50.151	454	15.439	116110000
Q6PKF2;A0A024R6D1;Q8TD19	Q6PKF2;A0A024R6D1;Q8TD19	Serine/threonine-protein kinase Nek9	NEK9	3	1	1	1	5.9	34.337	322	7.8868	115890000
Q53GR7;Q9UJS0;Q75KX8;B7Z2E2	Q53GR7;Q9UJS0;Q75KX8;B7Z2E2	Calcium-binding mitochondrial carrier protein Aralar2	SLC25A13	4	2	2	2	4.6	74.116	675	17.19	115000000
A2A2L5;B2RB99;B4DXL5;A0A0A0MQR2;Q9BY42;B4DEJ8;A2A2L6	A2A2L5;B2RB99;B4DXL5;A0A0A0MQR2;Q9BY42;B4DEJ8;A2A2L6	Protein RTF2 homolog	RTFDC1	7	2	2	2	10.5	31.151	277	15.893	108910000
A0A286YFL2;A0A286YFA2;B3KSC3;A0A286YF22;A0A2C9F2M7;V9HW79;O43175;A0A286YFM8;A0A286YF78;Q9UMY2;A0A286YF34;A0A286YFE1;A0A286YER3;A0A286YFC8;A0A286YFB2;Q8N5M8	A0A286YFL2;A0A286YFA2;B3KSC3;A0A286YF22;A0A2C9F2M7;V9HW79;O43175;A0A286YFM8;A0A286YF78;Q9UMY2	D-3-phosphoglycerate dehydrogenase	HEL-S-113;PHGDH;PGDH3	16	3	3	3	9.1	45.528	429	21.29	105980000
B4E106;B4DKS0;A0A024R0H1;P53985;Q5T8R3;Q5T8R5;B2R6A5	B4E106;B4DKS0;A0A024R0H1;P53985;Q5T8R3;Q5T8R5;B2R6A5	Monocarboxylate transporter 1	SLC16A1	7	2	2	2	6.7	51.878	480	23.283	104870000
G3V1A4;E9PP50;V9HWI5;E9PK25;P23528;E9PLJ3;E9PS23;B4E112;E9PQB7	G3V1A4;E9PP50;V9HWI5;E9PK25;P23528;E9PLJ3;E9PS23;B4E112;E9PQB7	Cofilin-1	CFL1;HEL-S-15	9	3	3	3	33.6	16.811	149	24.588	103990000
A0A0S2Z592;B4DI01;Q53H36;A0A0S2Z5J9;Q96SZ6;H0Y721	A0A0S2Z592;B4DI01;Q53H36;A0A0S2Z5J9;Q96SZ6;H0Y721	CDK5 regulatory subunit-associated protein 1	CDK5RAP1	6	4	4	4	11.2	57.412	510	31.536	103850000
D6RDI2;Q6PKC2;Q86Y74;B4DJ96;A8K3C5;J3KPP4;O95232	D6RDI2;Q6PKC2;Q86Y74;B4DJ96;A8K3C5;J3KPP4;O95232	Luc7-like protein 3	LUC7L3;CROP	7	1	1	1	9.8	20.677	184	13.17	103780000
B4DX78;O00148;K7EPJ3;K7EQN7;A0A024R7H0;Q5STU3;A0A024RCM3;Q13838;A0A286SD68;A0A286SD67;A0A286SD65;A0A286SD64;A0A286SD63;A0A286SD59;A0A286SD52;K7ENP6;A0A0G2JHN7;K7EL56;K7EIL8;F6U6E2;K7EN69;F6S2B7;F6SXL5;B4DH55;Q7KYK3;B4DF34;F6QYI9;A0A0G2JJL7;F6R6M7;F6S4E6;A0A0A0MT12;F6TRA5;F6WLT2;Q59G92;A0A0D9SEM9;Q69YT6;H0Y400;A0A140T9X3;A0A0G2JJZ9;B4DP52	B4DX78;O00148;K7EPJ3;K7EQN7;A0A024R7H0;Q5STU3;A0A024RCM3;Q13838;A0A286SD68;A0A286SD67;A0A286SD65;A0A286SD64;A0A286SD63;A0A286SD59;A0A286SD52;K7ENP6;A0A0G2JHN7;K7EL56;K7EIL8;F6U6E2;K7EN69;F6S2B7;F6SXL5;B4DH55;Q7KYK3;B4DF34;F6QYI9;A0A0G2JJL7;F6R6M7;F6S4E6;A0A0A0MT12;F6TRA5;F6WLT2;Q59G92	ATP-dependent RNA helicase DDX39A;Spliceosome RNA helicase DDX39B	DDX39A;DDX39;DDX39B;hCG_2005638;BAT1	40	4	4	4	9.4	53.696	470	26.063	103200000
D3DS95;Q59FI9;P30050	D3DS95;Q59FI9;P30050	60S ribosomal protein L12	hCG_21173;RPL12	3	1	1	1	17	10.123	94	6.8688	101650000
Q0VAB1;A0A024R0M6;Q3ZCQ8;M0R0C3;M0R2F8;M0R2Q2;M0R047;M0R1Y4;M0R003	Q0VAB1;A0A024R0M6;Q3ZCQ8;M0R0C3;M0R2F8	Mitochondrial import inner membrane translocase subunit TIM50	TIMM50	9	4	4	4	12.1	50.478	456	30.171	101200000
Q6I9V5;P12236;Q59EI9	Q6I9V5;P12236;Q59EI9	ADP/ATP translocase 3;ADP/ATP translocase 3, N-terminally processed	SLC25A6	3	8	2	2	26.8	32.866	298	14.126	100110000
Q6LET3;A0A140VJL3;P00492;A0A0H3YEQ7	Q6LET3;A0A140VJL3;P00492;A0A0H3YEQ7	Hypoxanthine-guanine phosphoribosyltransferase	HPRT1	4	2	2	2	9.2	24.588	218	12.69	97145000
M0QZC5;P62280	M0QZC5;P62280	40S ribosomal protein S11	RPS11	2	1	1	1	9.3	13.997	118	6.5117	96847000
Q6NSF2;F8VWS0;Q53HW2;Q53HK9;A8K4Z4;A0A024RBS2;P05388;F8VQY6;F8VPE8;F8VRK7;G3V210;F8VU65;B4E3D5;Q8NHW5;F8W1K8;F8VWV4;F8VS58;Q3MHV2;F8VW21;F8VZS0	Q6NSF2;F8VWS0;Q53HW2;Q53HK9;A8K4Z4;A0A024RBS2;P05388;F8VQY6;F8VPE8;F8VRK7;G3V210;F8VU65;B4E3D5;Q8NHW5	60S acidic ribosomal protein P0;60S acidic ribosomal protein P0-like	RPLP0;RPLP0P6	20	3	3	3	25.6	27.298	254	28.914	96183000
P60468	P60468	Protein transport protein Sec61 subunit beta	SEC61B	1	1	1	1	11.5	9.9743	96	7.3122	95938000
Q5HYH5;B2R6U8;A0A024R6W2;O43809	Q5HYH5;B2R6U8;A0A024R6W2;O43809	Cleavage and polyadenylation specificity factor subunit 5	DKFZp313O211;NUDT21	4	1	1	1	11.4	12.37	105	7.8181	93594000
Q9BQP7;Q5QPE7;Q5QPE8	Q9BQP7;Q5QPE7;Q5QPE8	Mitochondrial genome maintenance exonuclease 1	MGME1	3	3	3	3	18.3	39.42	344	19.315	92849000
B4DSA4;Q7KZA3;Q53FU1;Q5TZY0;P22830;K7ELX4;K7EJX5	B4DSA4;Q7KZA3;Q53FU1;Q5TZY0;P22830;K7ELX4	Ferrochelatase;Ferrochelatase, mitochondrial	DKFZp686P18130;FECH	7	3	3	3	18.5	32.283	281	21.27	92274000
K7ENH2;B3KQ25;K7ESG5;K9J957;V9HWJ8;Q6FHK7;A0A024R203;P61289;K7EMD0;K7EPX6;K7EKR3;J7FRP4;A0A087WTV2	K7ENH2;B3KQ25;K7ESG5;K9J957;V9HWJ8;Q6FHK7;A0A024R203;P61289;K7EMD0;K7EPX6;K7EKR3;J7FRP4;A0A087WTV2	Proteasome activator complex subunit 3	PSME3;HEL-S-283	13	2	2	2	15.6	20.593	179	18.415	91863000
A2A2Q9;Q9Y312	A2A2Q9;Q9Y312	Protein AAR2 homolog	AAR2	2	1	1	1	5	45.034	398	6.013	91455000
B7Z5M1;J3KTM9;B2RBR9;Q14974;B7Z752;J3QRG4	B7Z5M1;J3KTM9;B2RBR9;Q14974;B7Z752	Importin subunit beta-1	KPNB1	6	3	3	3	6.7	73.298	660	30.481	90189000
A0A024QZS1;O96007	A0A024QZS1;O96007	Molybdopterin synthase catalytic subunit	MOCS2	2	2	2	2	18.6	20.944	188	14.278	89377000
Q9Y266	Q9Y266	Nuclear migration protein nudC	NUDC	1	1	1	1	3.3	38.242	331	6.6609	89376000
F5GYN4;J3KR44;F5H6Q1;F5GYJ8;B4DPD5;Q96FW1	F5GYN4;J3KR44;F5H6Q1;F5GYJ8;B4DPD5;Q96FW1	Ubiquitin thioesterase OTUB1	OTUB1	6	1	1	1	7.9	28.05	241	12.98	89281000
F8WAM2;Q6IBT3;Q53HV2;Q99832	F8WAM2;Q6IBT3;Q53HV2;Q99832	T-complex protein 1 subunit eta	CCT7	4	1	1	1	10.2	10.494	98	6.4123	89182000
Q9Y3Z5;D6REL4;Q9H4P6;E7EQZ7;Q9UK43;Q95HA6;B2R5Y4;Q13123	Q9Y3Z5;D6REL4;Q9H4P6;E7EQZ7;Q9UK43;Q95HA6;B2R5Y4;Q13123	Protein Red	DKFZp564B112;IK;CSA2	8	1	1	1	7.3	23.915	205	5.824	88882000
B4DJ81;E5KRK5;P28331;Q9P1A0;A0A291FIZ5	B4DJ81;E5KRK5;P28331;Q9P1A0;A0A291FIZ5	NADH-ubiquinone oxidoreductase 75 kDa subunit, mitochondrial	NDUFS1	5	2	2	2	6.2	66.921	611	21.243	88332000
Q9BVA1;Q13885;A0A024QZU2;O43209;B7Z4N1;Q9UGA2	Q9BVA1;Q13885;A0A024QZU2;O43209;B7Z4N1;Q9UGA2	Tubulin beta-2B chain;Tubulin beta-2A chain	TUBB2B;TUBB2A;DKFZp566F223	6	14	1	1	39.3	49.953	445	9.1667	87137000
A0A1W2PRS6;A0A1W2PQL7;A0A1W2PRA4;Q59GD2;A0A1W2PQM7;A0A1W2PS91;D1KF47;A0A1W2PSA8;A0A1W2PPN2;E9PKM0;A0A1W2PQA8;Q66SS1;B3KQG1;F1T0F8;D3DQZ8;A0A1W2PQG7;P26367;E5LBD7;Q2XU31;Q7Z5Y4;Q56H36;A0A1W2PQW3;A0A1W2PRW7;A0A1W2PSB5;A0A1W2PQG3;A0A1W2PPG3;B1B1J0;A0A1W2PP89;A0A1W2PP27;A0A1W2PRU4;A0A1W2PQJ8;A0A1W2PQ31;A0A1W2PNS7;A0A1W2PPJ2;A0A1W2PPH0;A0A1W2PRA8;A0A1W2PRH6;A0A1W2PPM5;B1B1I8;A0A1X7SBT0;B1B1I9;A0A1W2PR…	A0A1W2PRS6;A0A1W2PQL7;A0A1W2PRA4;Q59GD2;A0A1W2PQM7;A0A1W2PS91;D1KF47;A0A1W2PSA8;A0A1W2PPN2;E9PKM0;A0A1W2PQA8;Q66SS1;B3KQG1;F1T0F8;D3DQZ8;A0A1W2PQG7;P26367;E5LBD7;Q2XU31;Q7Z5Y4;Q56H36;A0A1W2PQW3;A0A1W2PRW7;A0A1W2PSB5;A0A1W2PQG3;A0A1W2PPG3;B1B1J0;A0A1W2PP89;A0A1W2PP27;A0A1W2PRU4;A0A1W2PQJ8;A0A1W2PQ31;A0A1W2PNS7;A0A1W2PPJ2;A0A1W2PPH0;A0A1W2PRA8;A0A1W2PRH6;A0A1W2PPM5;B1B1I8;A0A1X7SBT0;B1B1I9;A0A1W2PR…	Paired box protein Pax-6	PAX6	42	2	2	2	7.9	37.981	341	13.827	86311000
K4DIB6;K4DIB3;K4DIB8;K4DIA8;E9PS95;A0A0D9SEI9;A0A0D9SFE1;A0A024RCA6;E9PJH7;A0A024R0W0;Q9H1K4;Q9H936	K4DIB6;K4DIB3;K4DIB8;K4DIA8;E9PS95;A0A0D9SEI9;A0A0D9SFE1;A0A024RCA6;E9PJH7;A0A024R0W0;Q9H1K4;Q9H936	Mitochondrial glutamate carrier 2;Mitochondrial glutamate carrier 1	SLC25A22;SLC25A18	12	1	1	1	5.1	16.696	156	5.8024	85591000
Q9UPT9	Q9UPT9	Ubiquitin carboxyl-terminal hydrolase 22	USP22	1	1	1	1	4.4	59.96	525	16.45	85324000
E7EVA0;P27816;Q8NDS5;B4DSQ1;H7C456;Q05D06;H0Y2V1;Q6NX68;H7C4C5;A0A024R2V2;A0A024R2S1;A0A024R2V0;B4DM10;B5MEG9;F8W9U4;Q86Y04	E7EVA0;P27816;Q8NDS5;B4DSQ1;H7C456;Q05D06;H0Y2V1;Q6NX68;H7C4C5;A0A024R2V2;A0A024R2S1;A0A024R2V0;B4DM10;B5MEG9;F8W9U4;Q86Y04	Microtubule-associated protein;Microtubule-associated protein 4	MAP4;DKFZp547H1810	16	2	2	2	0.8	245.44	2297	13.373	84728000
Q15084	Q15084	Protein disulfide-isomerase A6	PDIA6	1	3	3	3	8.9	48.121	440	30.444	83324000
A0A087WYY5;F8VR82;Q9UPN1;F8VYE8;A0A024RBP2;F8W0W8;P36873;F8WE71;C9J9S3;C9JP48;F5H1L6;E7ETD8;F5H037;B4E163;E9PMD7;B7ZB67;B4DJ75;V9HW04;A0A140VJS9;B3KXM2;P62140;P62136	A0A087WYY5;F8VR82;Q9UPN1;F8VYE8;A0A024RBP2;F8W0W8;P36873;F8WE71;C9J9S3;C9JP48;F5H1L6;E7ETD8;F5H037;B4E163;E9PMD7;B7ZB67;B4DJ75;V9HW04;A0A140VJS9;B3KXM2;P62140;P62136	Serine/threonine-protein phosphatase;Serine/threonine-protein phosphatase PP1-gamma catalytic subunit;Serine/threonine-protein phosphatase PP1-beta catalytic subunit;Serine/threonine-protein phosphatase PP1-alpha catalytic subunit	PPP1CC;PPP1CB;PPP1CA;HEL-S-80p	22	2	2	2	19.3	16.214	140	13.997	81331000
P31689	P31689	DnaJ homolog subfamily A member 1	DNAJA1	1	1	1	1	3	44.868	397	5.8517	79693000
A4UCS6;V9HWC7;P30041	A4UCS6;V9HWC7;P30041	Peroxiredoxin-6	HEL-S-128m;PRDX6	3	1	1	1	21.2	8.7942	80	11.685	79644000
H3BUH7;H3BPS8;H3BQN4;V9HWN7;J3KPS3;P04075	H3BUH7;H3BPS8;H3BQN4;V9HWN7;J3KPS3;P04075	Fructose-bisphosphate aldolase;Fructose-bisphosphate aldolase A	ALDOA;HEL-S-87p	6	1	1	1	13.5	16.917	155	7.1679	79297000
Q7Z4Q5;A0A1W2PQL0;A0A1W2PP34;A0A1W2PPL4;A0A1W2PPH7;Q5RI18;Q96BA7;A0A1W2PP35;A0A1X7SBS1;B3KX72;B4DLR3;A0A1W2PPS1;Q00839;A0A1W2PRZ7;A0A1W2PQD4;A0A1W2PQ74	Q7Z4Q5;A0A1W2PQL0;A0A1W2PP34;A0A1W2PPL4;A0A1W2PPH7;Q5RI18;Q96BA7;A0A1W2PP35;A0A1X7SBS1;B3KX72;B4DLR3;A0A1W2PPS1;Q00839;A0A1W2PRZ7;A0A1W2PQD4;A0A1W2PQ74	Heterogeneous nuclear ribonucleoprotein U	HNRPU;HNRNPU	16	2	2	2	6.2	57.663	513	12.464	79284000
P02461	P02461	Collagen alpha-1(III) chain	COL3A1	1	1	1	1	0.6	138.56	1466	5.5683	79220000
A0A0S2Z5P5;Q9BTE3	A0A0S2Z5P5;Q9BTE3	Mini-chromosome maintenance complex-binding protein	MCMBP	2	2	2	2	3.4	72.748	640	13.853	79041000
Q8NHP8	Q8NHP8	Putative phospholipase B-like 2;Putative phospholipase B-like 2 32 kDa form;Putative phospholipase B-like 2 45 kDa form	PLBD2	1	2	2	2	6.3	65.471	589	14.02	77216000
A0A0S2Z4Z0;Q96PK6;A0A0A6YYI9;A0A0S2Z5V2;F8WDX3;A0A0A0MSL8;A0A0S2Z567;B8ZZ74;Q59GV2	A0A0S2Z4Z0;Q96PK6;A0A0A6YYI9;A0A0S2Z5V2;F8WDX3;A0A0A0MSL8;A0A0S2Z567;B8ZZ74;Q59GV2	RNA-binding protein 14	RBM14;RBM14-RBM4	9	2	2	2	3.9	69.491	669	13.942	76027000
E5RFI6;E5RJ04;E5RGV4;E5RHE7;E5RH52;E5RG37;E5RFP9;H3BM24;B7Z3S4;Q5TEE2;B4DSK9;B3KUJ5;Q6IT96;B5BU61;Q13547;Q92769	E5RFI6;E5RJ04;E5RGV4;E5RHE7;E5RH52;E5RG37;E5RFP9;H3BM24;B7Z3S4;Q5TEE2;B4DSK9;B3KUJ5;Q6IT96;B5BU61;Q13547;Q92769	Histone deacetylase;Histone deacetylase 1;Histone deacetylase 2	HDAC2;HDAC1	16	1	1	1	20	7.4336	60	6.4941	74607000
H0YJ63;G3V438;H0YJG7;O95433	H0YJ63;G3V438;H0YJG7;O95433	Activator of 90 kDa heat shock protein ATPase homolog 1	AHSA1	4	1	1	1	24.4	10.031	90	16.198	74225000
Q96IX5	Q96IX5	Up-regulated during skeletal muscle growth protein 5	USMG5	1	1	1	1	25.9	6.4575	58	9.4283	73686000
Q9ULC4	Q9ULC4	Malignant T-cell-amplified sequence 1	MCTS1	1	1	1	1	9.9	20.555	181	7.378	73061000
Q5QPJ9;A0A0S2Z4Y5;Q5QPK2;H0Y368;O60762	Q5QPJ9;A0A0S2Z4Y5;Q5QPK2;H0Y368;O60762	Dolichol-phosphate mannosyltransferase subunit 1	DPM1	5	1	1	1	10	25.106	221	34.392	70637000
Q15374;Q3B7A7;Q59HH3;P22102;C9JZG2;C9JKQ7;C9JBJ1;C9JTV6;F8WD69	Q15374;Q3B7A7;Q59HH3;P22102;C9JZG2;C9JKQ7;C9JBJ1;C9JTV6;F8WD69	Trifunctional purine biosynthetic protein adenosine-3;Phosphoribosylamine--glycine ligase;Phosphoribosylformylglycinamidine cyclo-ligase;Phosphoribosylglycinamide formyltransferase	GART	9	3	3	3	11.5	45.987	433	24.183	69742000
M0QX76;M0R1M5;M0R3H0;M0R210;Q6IPX4;P62249	M0QX76;M0R1M5;M0R3H0;M0R210;Q6IPX4;P62249	40S ribosomal protein S16	RPS16	6	1	1	1	20	5.5575	50	6.778	69123000
C9JJT5;C9JU26;G3V325;B4DJ38;P56134	C9JJT5;C9JU26;G3V325;B4DJ38;P56134	ATP synthase subunit f, mitochondrial	ATP5J2-PTCD1;ATP5J2	5	1	1	1	20.4	5.9149	54	6.8747	68499000
O43824	O43824	Putative GTP-binding protein 6	GTPBP6	1	1	1	1	2.1	56.897	516	7.663	68340000
P62318	P62318	Small nuclear ribonucleoprotein Sm D3	SNRPD3	1	1	1	1	7.1	13.916	126	5.603	67865000
D6RAA6;A6QKW0;A0A024R9W7;P57088	D6RAA6;A6QKW0;A0A024R9W7;P57088	Transmembrane protein 33	TMEM33;SHINC3	4	1	1	1	5.4	25.223	222	22.905	67799000
D6R9Q5;A0A286YEY6;D6RD74;D6RA92;Q9UM13	D6R9Q5;A0A286YEY6;D6RD74;D6RA92;Q9UM13	Anaphase-promoting complex subunit 10	ANAPC10	5	1	1	1	11	12.346	109	7.5776	67338000
Q8N9Z3;K0A7K7;Q9BV61;Q59EK6;Q53G55;Q53FS6;A0A140VJY2;Q12931;Q5CAQ4;I3L0K7	Q8N9Z3;K0A7K7;Q9BV61;Q59EK6;Q53G55;Q53FS6;A0A140VJY2;Q12931;Q5CAQ4;I3L0K7	Heat shock protein 75 kDa, mitochondrial	TRAP1	10	2	2	2	4.8	66.046	579	19.932	66726000
H0YLA2;P37108	H0YLA2;P37108	Signal recognition particle 14 kDa protein	SRP14	2	1	1	1	11.3	13.058	115	7.5035	65804000
Q7L0Y3;C9JVB6	Q7L0Y3;C9JVB6	Mitochondrial ribonuclease P protein 1	TRMT10C	2	2	2	2	5.2	47.346	403	11.724	65751000
A0A1B0GV93;B4DWS6;B3KQJ0;D3DR22;Q53GQ0	A0A1B0GV93;B4DWS6;B3KQJ0;D3DR22;Q53GQ0	Very-long-chain 3-oxoacyl-CoA reductase	HSD17B12	5	1	1	1	5.1	30.361	276	6.4711	65466000
F8VQR7;A0A024RBB5;Q16527;F8VW96	F8VQR7;A0A024RBB5;Q16527;F8VW96	Cysteine and glycine-rich protein 2	CSRP2	4	2	2	2	16.6	20.677	187	11.395	65416000
C9JDH0;E7EW35;C9JDU5;C9JJS3;C9K0K7;E7EPA1;B2R7R5;A0A024QYY3;O60256;I3L331;I3L164	C9JDH0;E7EW35;C9JDU5;C9JJS3;C9K0K7;E7EPA1;B2R7R5;A0A024QYY3;O60256;I3L331;I3L164	Phosphoribosyl pyrophosphate synthase-associated protein 2	PRPSAP2	11	2	2	2	15.7	15.597	140	13.162	64105000
A0A087WTP3;Q92945;B4DV73;M0QXW7;M0QYH3;M0R0I5	A0A087WTP3;Q92945;B4DV73	Far upstream element-binding protein 2	KHSRP	6	3	3	3	5.2	73.027	711	22.793	62654000
Q7Z5Y0;F8VX11;B4DS01;B4DEP6;E7EX17;B4DRM3;P23588	Q7Z5Y0;F8VX11;B4DS01;B4DEP6;E7EX17;B4DRM3;P23588	Eukaryotic translation initiation factor 4B	EIF4B	7	1	1	1	4.6	39.217	349	10.035	62481000
C9J352;C9JWD9;F2Z3G4;C9J4U1;C9JYI4;Q5BKZ2;P52294	C9J352;C9JWD9;F2Z3G4;C9J4U1;C9JYI4;Q5BKZ2;P52294	Importin subunit alpha;Importin subunit alpha-5;Importin subunit alpha-5, N-terminally processed	KPNA1	7	1	1	1	5.3	19.389	169	5.7044	62343000
R4SCQ0;R4SCP5;R4SCF3;R4SCC4;R4S1C5;R4RZ18;R4RYZ7;R4RYY7;Q9GZT9	R4SCQ0;R4SCP5;R4SCF3;R4SCC4;R4S1C5;R4RZ18;R4RYZ7;R4RYY7;Q9GZT9	Egl nine homolog 1	EGLN1	9	1	1	1	5.6	46.02	426	7.8979	61112000
C9J5W5;C9JRV9;E7EWE1;E7EQ61;Q9GZZ9	C9J5W5;C9JRV9;E7EWE1;E7EQ61;Q9GZZ9	Ubiquitin-like modifier-activating enzyme 5	UBA5	5	1	1	1	8.3	12.186	108	5.8686	60641000
H3BSQ5;H3BUE3;H3BSK9;A0A024QZC0;A0A024QZB7;A0A024QZ91;H3BUF6;Q8WWM7	H3BSQ5;H3BUE3;H3BSK9;A0A024QZC0;A0A024QZB7;A0A024QZ91;H3BUF6;Q8WWM7	Ataxin-2-like protein	ATXN2L	8	1	1	1	23.1	10.113	91	16.187	59637000
Q8IYN5;Q14008	Q8IYN5;Q14008	Cytoskeleton-associated protein 5	CKAP5	2	1	1	1	3.5	106.96	953	5.8225	58281000
A0A024R326;Q6IPI1;P47914	A0A024R326;Q6IPI1;P47914	60S ribosomal protein L29	RPL29	3	1	1	1	9.6	17.553	157	7.6126	58030000
A0A2R8Y6L3;F6U211;Q59GE4;A0A2R8Y7H1;A0A2R8YFH6;A0A1W2PQS6;P46783	A0A2R8Y6L3;F6U211;Q59GE4;A0A2R8Y7H1;A0A2R8YFH6;A0A1W2PQS6;P46783	40S ribosomal protein S10	RPS10	7	1	1	1	7.4	14.294	121	6.2731	58029000
H7BZ35;Q53T60;D3DP78;A0A140VJW5;P14868	H7BZ35;Q53T60;D3DP78;A0A140VJW5;P14868	Aspartate--tRNA ligase, cytoplasmic	DARS	5	1	1	1	5.3	21.608	188	5.9103	57873000
K7EIN1;K7ESN4;K7EIJ0;K7EIK1;K7ENL2;A6NG10;K7EMC9;Q7Z511;A0A024R8L1;Q969T9	K7EIN1;K7ESN4;K7EIJ0;K7EIK1;K7ENL2;A6NG10;K7EMC9;Q7Z511;A0A024R8L1;Q969T9	WW domain-binding protein 2	WBP2	10	1	1	1	8.8	11.967	114	6.3758	57333000
Q9H773	Q9H773	dCTP pyrophosphatase 1	DCTPP1	1	2	2	2	19.4	18.681	170	14.58	55897000
A4UJ43;A0A0A0MTN3;Q6FGJ9;Q59EJ5;P21266;Q6ZSP8;Q5T8Q9;Q5T8R2;Q5T8R1;P46439	A4UJ43;A0A0A0MTN3;Q6FGJ9;Q59EJ5;P21266;Q6ZSP8;Q5T8Q9;Q5T8R2;Q5T8R1;P46439	Glutathione S-transferase Mu 3;Glutathione S-transferase Mu 5	GSTM3;GSTM5	10	2	2	1	9.5	24.818	210	12.083	55833000
A0A2R8YEW1;V9GYA2;A0A2R8Y4D6;A0A2R8Y4H0;A0A2R8Y5A0;A0A2R8YF43;A0A2R8YD58;Q2I0Y7;E7EU96;B5BUH5;B2R6D7;Q5U5J2;Q8NEV1;P68400	A0A2R8YEW1;V9GYA2;A0A2R8Y4D6;A0A2R8Y4H0;A0A2R8Y5A0;A0A2R8YF43;A0A2R8YD58;Q2I0Y7;E7EU96;B5BUH5;B2R6D7;Q5U5J2;Q8NEV1;P68400	Casein kinase II subunit alpha 3;Casein kinase II subunit alpha	CSNK2A1;CSNK2A3	14	1	1	1	13.5	15.514	133	7.5578	55350000
P54886	P54886	Delta-1-pyrroline-5-carboxylate synthase;Glutamate 5-kinase;Gamma-glutamyl phosphate reductase	ALDH18A1	1	3	3	3	4.3	87.301	795	21.468	55292000
Q9BYB4;C9JPQ6	Q9BYB4;C9JPQ6	Guanine nucleotide-binding protein subunit beta-like protein 1	GNB1L	2	3	3	3	8.6	35.618	327	18.651	54663000
A0A2R8Y6A7;A0A2R8YD12;A0A024QZX3;A0A024QZX5;A0A087X1N8;P35237;Q8IXH2	A0A2R8Y6A7;A0A2R8YD12;A0A024QZX3;A0A024QZX5;A0A087X1N8;P35237;Q8IXH2	Serpin B6	SERPINB6	7	2	2	2	14	19.658	171	15.372	52623000
Q7Z759;Q53HU0;P50990;H7C2U0	Q7Z759;Q53HU0;P50990;H7C2U0	T-complex protein 1 subunit theta	CCT8	4	2	2	2	4.2	54.106	497	14.671	52117000
Q0VAS5;B2R4R0;P62805	Q0VAS5;B2R4R0;P62805	Histone H4	HIST1H4H;HIST1H4A	3	2	2	2	23.3	11.314	103	20.303	51889000
O14654	O14654	Insulin receptor substrate 4	IRS4	1	1	1	1	1.8	133.77	1257	6.5665	51844000
P40222	P40222	Alpha-taxilin	TXLNA	1	2	2	2	3.7	61.89	546	12.435	51644000
D6RGE0;D6RED7;D6RAS7;B7Z3M5;H0Y8L7;D6RB09;E9PFI5;D6RG13;D6RAT0;Q6NXR8;A8K4W0;P61247	D6RGE0;D6RED7;D6RAS7;B7Z3M5;H0Y8L7;D6RB09;E9PFI5;D6RG13;D6RAT0;Q6NXR8;A8K4W0;P61247	40S ribosomal protein S3a	RPS3A	12	1	1	1	13.8	7.2853	65	5.5096	51479000
Q96K98;Q96K97;B4DVI7;Q9UHB9	Q96K98;Q96K97;B4DVI7;Q9UHB9	Signal recognition particle subunit SRP68	SRP68	4	1	1	1	4	37.216	327	6.692	50584000
Q6IB11;O00264	Q6IB11;O00264	Membrane-associated progesterone receptor component 1	PGRMC1	2	1	1	1	7.2	21.671	195	9.2017	50495000
B4E1K8;O15371;B0QYA4;B0QYA5	B4E1K8;O15371;B0QYA4;B0QYA5	Eukaryotic translation initiation factor 3 subunit D	EIF3D	4	2	2	2	8.6	52.827	451	18.181	50243000
Q9UM85;Q3L3Q5;D5FZW3;A0A2S1CVU8;E9M263;Q9BXA2;Q9UBV6;Q14484;A9YUX2;A0A2R3Z0D6;A8MUF7;B5ANL9;Q9UP81;F8W6P5;Q4TZM4;Q14477;Q14476;E9PEW8;Q9BWU5;Q8IZI0;Q8IUL9;Q6V0K9;Q6J1Z7;Q670S4;Q52MT0;Q4F786;Q3LR79;Q0Z944;E9NGZ5;D1MGQ0;B7UCU6;B3VL31;B3VL05;B2M1S8;Q9BWV6;A0A2R8Y7R2;Q9GZL9;Q14474;Q9UK54;Q9UNL6;B3VL86;E9PFT6;E7CYP2;D9YZU9;D9YZU8;D9YZU7;D9YZU5;D3GKD9;D3GKD8;C8C504;A0N071;Q14403;A0A2R8Y7X9;Q14473;P6989…	Q9UM85;Q3L3Q5;D5FZW3;A0A2S1CVU8;E9M263;Q9BXA2;Q9UBV6;Q14484;A9YUX2;A0A2R3Z0D6;A8MUF7;B5ANL9;Q9UP81;F8W6P5;Q4TZM4;Q14477;Q14476;E9PEW8;Q9BWU5;Q8IZI0;Q8IUL9;Q6V0K9;Q6J1Z7;Q670S4;Q52MT0;Q4F786;Q3LR79;Q0Z944;E9NGZ5;D1MGQ0;B7UCU6;B3VL31;B3VL05;B2M1S8;Q9BWV6;A0A2R8Y7R2;Q9GZL9;Q14474;Q9UK54;Q9UNL6;B3VL86;E9PFT6;E7CYP2;D9YZU9;D9YZU8;D9YZU7;D9YZU5;D3GKD9;D3GKD8;C8C504;A0N071;Q14403;A0A2R8Y7X9;Q14473;P6989…	Hemoglobin subunit gamma-2;Hemoglobin subunit gamma-1;Hemoglobin subunit beta;LVV-hemorphin-7;Spinorphin;Hemoglobin subunit epsilon;Hemoglobin subunit delta	beta-globin;HBB;HBE1;HBD;HBG2;HBG1	59	1	1	1	58.8	2.1044	17	9.6434	49442000
B3KNG2;B3KME8;B4DM08;B3KNF6;B4DR61;P61619	B3KNG2;B3KME8;B4DM08;B3KNF6;B4DR61;P61619	Protein transport protein Sec61 subunit alpha isoform 1	SEC61A1	6	1	1	1	9.2	11.742	109	6.4266	48902000
D6RDY6;Q86X80;A0PJJ5;Q0D2M6;V9HWK0;Q71V07;O76094	D6RDY6;Q86X80;A0PJJ5;Q0D2M6;V9HWK0;Q71V07;O76094	Signal recognition particle subunit SRP72	SRP72;HEL103	7	1	1	1	3.9	37.595	335	8.1502	48651000
C9JRH2;C9JMJ4;C9J3R0;C9JQZ4;C9JW69;Q5T081;A0A0S2Z3I4;A0A0S2Z404;P18754	C9JRH2;C9JMJ4;C9J3R0;C9JQZ4;C9JW69;Q5T081;A0A0S2Z3I4;A0A0S2Z404;P18754	Regulator of chromosome condensation	RCC1	9	1	1	1	6.5	24.465	230	7.7889	48353000
A0A1U9X7J2;N0E4C7;Q5SRQ6;P67870	A0A1U9X7J2;N0E4C7;Q5SRQ6;P67870	Casein kinase II subunit beta	CSNK2B	4	1	1	1	4.2	24.685	212	27.916	48142000
Q14657	Q14657	EKC/KEOPS complex subunit LAGE3	LAGE3	1	1	1	1	16.1	14.804	143	8.2453	48135000
Q53ET2;Q86U75;Q59GB4;A0A1C7CYX9;Q16555	Q53ET2;Q86U75;Q59GB4;A0A1C7CYX9;Q16555	Dihydropyrimidinase-related protein 2	DPYSL2	5	1	1	1	4.7	62.27	572	5.9162	47584000
Q9UBV8	Q9UBV8	Peflin	PEF1	1	1	1	1	3.5	30.381	284	5.5157	46654000
A5YPB6;A5PHJ9;A0A024RBX9;P29803;P08559	A5YPB6;A5PHJ9;A0A024RBX9;P29803;P08559	Pyruvate dehydrogenase E1 component subunit alpha;Pyruvate dehydrogenase E1 component subunit alpha, testis-specific form, mitochondrial;Pyruvate dehydrogenase E1 component subunit alpha, somatic form, mitochondrial	PDHA1;PDHA1/LOC79064;PDHA2	5	1	1	1	4.2	28.779	261	7.8051	46399000
B4DRD4;A8K0I0;A0A024R1C1;Q13356	B4DRD4;A8K0I0;A0A024R1C1;Q13356	Peptidyl-prolyl cis-trans isomerase-like 2	PPIL2	4	1	1	1	2.5	55.79	489	6.3065	46060000
Q8IYS1	Q8IYS1	Peptidase M20 domain-containing protein 2	PM20D2	1	1	1	1	4.6	47.776	436	6.4175	45852000
Q8NHH1	Q8NHH1	Tubulin polyglutamylase TTLL11	TTLL11	1	1	1	1	1.1	87.611	800	5.9511	45623000
B4DHP4;S4R3P5;B2R6J3;Q96EY8	B4DHP4;S4R3P5;B2R6J3;Q96EY8	Cob(I)yrinic acid a,c-diamide adenosyltransferase, mitochondrial	MMAB	4	1	1	1	6.3	17.669	159	5.7058	45121000
F8WF32;Q96HX3;Q6IBR0;Q53EP4;P04843	F8WF32;Q96HX3;Q6IBR0;Q53EP4;P04843	Dolichyl-diphosphooligosaccharide--protein glycosyltransferase subunit 1	RPN1	5	1	1	1	12.4	12.695	121	9.8615	44877000
Q6PJ96;Q5T200	Q6PJ96;Q5T200	Zinc finger CCCH domain-containing protein 13	ZC3H13	2	1	1	1	3.2	32.523	283	5.6226	44142000
A0A024R8W0;P38919	A0A024R8W0;P38919	Eukaryotic initiation factor 4A-III;Eukaryotic initiation factor 4A-III, N-terminally processed	DDX48;EIF4A3	2	1	1	1	3.6	46.871	411	7.1116	43813000
B4E1P6;B4DLQ2;H0YDD4;E9PEJ4;B4DJX1;Q86YI5;A0A024R3D8;P10515	B4E1P6;B4DLQ2;H0YDD4;E9PEJ4;B4DJX1;Q86YI5;A0A024R3D8;P10515	Acetyltransferase component of pyruvate dehydrogenase complex;Dihydrolipoyllysine-residue acetyltransferase component of pyruvate dehydrogenase complex, mitochondrial	DLAT	8	1	1	1	7.6	24.101	225	10.993	43758000
E9PG39;B4DR72;E9PC15;B4E2Z8;A4D1U5;Q53H12	E9PG39;B4DR72;E9PC15;B4E2Z8;A4D1U5;Q53H12	Acylglycerol kinase, mitochondrial	AGK;FLJ10842	6	1	1	1	4.9	26.925	244	6.8115	43752000
Q5HY57;P50402	Q5HY57;P50402	Emerin	EMD	2	1	1	1	4.6	24.938	219	5.8861	43677000
Q5QPE1;B4DS04;B4DRA5;B4DJW8;A0A2R8YFH5;Q15437	Q5QPE1;B4DS04;B4DRA5;B4DJW8;A0A2R8YFH5;Q15437	Protein transport protein Sec23B	SEC23B	6	1	1	1	6.9	28.626	246	10.987	43663000
B5BU53;B2R9L6;A0A024R880;P50750	B5BU53;B2R9L6;A0A024R880;P50750	Cyclin-dependent kinase 9	CDK9	4	1	1	1	3.2	42.778	372	8.3327	43561000
A4UCT1;Q0QET7;E7EUT5;V9HVZ4;Q2TSD0;P04406	A4UCT1;Q0QET7;E7EUT5;V9HVZ4;Q2TSD0;P04406	Glyceraldehyde-3-phosphate dehydrogenase	GAPDH;HEL-S-162eP	6	1	1	1	14.5	17.303	166	11.269	42581000
K7EJM5;A0A0A0N0N3;A0A087WX29;A0A0A0N0M3;K7EN94;B1AKP7;G3V162;A0A087X260;A0A087WYY0;A0A0A0N0L3;A0A024R4E2;Q13148;K7EJ99;A0A0A0MSV7;A0A087WXQ5;A0A087WV68;A0A1W2PNU8;B4DRW3	K7EJM5;A0A0A0N0N3;A0A087WX29;A0A0A0N0M3;K7EN94;B1AKP7;G3V162;A0A087X260;A0A087WYY0;A0A0A0N0L3;A0A024R4E2;Q13148;K7EJ99;A0A0A0MSV7;A0A087WXQ5;A0A087WV68;A0A1W2PNU8;B4DRW3	TAR DNA-binding protein 43	TARDBP;TDP43	18	2	2	2	10.9	22.844	201	14.273	42563000
Q6PKI6;Q7KZ24;H0Y449;P67809	Q6PKI6;Q7KZ24;H0Y449;P67809	Nuclease-sensitive element-binding protein 1	YBX1	4	1	1	1	7.1	29.374	266	8.9232	42548000
B8ZZK4;H7C2W9;C9JU56;B7Z4E3;B2R4C1;B7Z4C8;P62899	B8ZZK4;H7C2W9;C9JU56;B7Z4E3;B2R4C1;B7Z4C8;P62899	60S ribosomal protein L31	RPL31	7	1	1	1	11.4	8.9876	79	6.2034	41814000
Q9NRN7	Q9NRN7	L-aminoadipate-semialdehyde dehydrogenase-phosphopantetheinyl transferase	AASDHPPT	1	1	1	1	4.9	35.776	309	10.778	40814000
A0A024R3C3;A0A024R394;Q9UHD1;E9PPQ5	A0A024R3C3;A0A024R394;Q9UHD1;E9PPQ5	Cysteine and histidine-rich domain-containing protein 1	CHORDC1	4	2	2	2	12.8	35.33	313	14.618	40611000
Q9P1D9;Q5U0F4;Q53HU7;Q13347	Q9P1D9;Q5U0F4;Q53HU7;Q13347	Eukaryotic translation initiation factor 3 subunit I	EIF3I	4	1	1	1	16.4	8.4352	73	11.258	40229000
B1AQP2;Q9UHV9	B1AQP2;Q9UHV9	Prefoldin subunit 2	PFDN2	2	1	1	1	5.8	16.648	154	6.1786	40152000
H3BSA1;P19784;H3BV19	H3BSA1;P19784;H3BV19	Casein kinase II subunit alpha	CSNK2A2	3	2	2	2	13.9	27.025	230	18.854	39369000
H7C4H8;Q53XR2;B3KST9;F8W8D3;Q14493	H7C4H8;Q53XR2;B3KST9;F8W8D3;Q14493	Histone RNA hairpin-binding protein	SLBP	5	1	1	1	7.5	21.231	186	9.3332	39331000
Q7Z5L9	Q7Z5L9	Interferon regulatory factor 2-binding protein 2	IRF2BP2	1	1	1	1	2	61.024	587	6.3831	38542000
C9JXG8;D3DX26;B3KUP2;A0A140VK94;C9JGV6;F6WQW2;P43487	C9JXG8;D3DX26;B3KUP2;A0A140VK94;C9JGV6;F6WQW2;P43487	Ran-specific GTPase-activating protein	RANBP1	7	2	2	2	11	16.9	145	11.006	38166000
P35606	P35606	Coatomer subunit beta	COPB2	1	1	1	1	1.1	102.49	906	6.6868	38140000
A0A024R3P9;Q9H3P7	A0A024R3P9;Q9H3P7	Golgi resident protein GCP60	ACBD3	2	2	2	2	6.1	60.593	528	19.253	38001000
Q9BTA1;B3KQE8;B3KNH1;A0A024R8D2;Q6P1M0	Q9BTA1;B3KQE8;B3KNH1;A0A024R8D2;Q6P1M0	Long-chain fatty acid transport protein 4	SLC27A4	5	1	1	1	7.4	28.826	258	6.0507	36800000
B4DIT7;B4DTN7;V9HWG3;P21980	B4DIT7;B4DTN7;V9HWG3;P21980	Protein-glutamine gamma-glutamyltransferase 2	HEL-S-45;TGM2	4	1	1	1	2.6	68.648	606	10.818	36693000
Q08J23	Q08J23	tRNA (cytosine(34)-C(5))-methyltransferase	NSUN2	1	1	1	1	1.2	86.47	767	5.5877	36610000
D6R9W4;B3KSQ7;A0A2Z6ATB6;Q16643	D6R9W4;B3KSQ7;A0A2Z6ATB6;Q16643	Drebrin	DBN1	4	1	1	1	5	36.471	317	6.5606	36481000
Q7KYM9;Q59ES8;A0A087X0X3;P52272;M0QY96;M0R2I7;Q6P2D7;M0R019;M0R2T0;B4DEG4	Q7KYM9;Q59ES8;A0A087X0X3;P52272;M0QY96;M0R2I7;Q6P2D7;M0R019;M0R2T0;B4DEG4	Heterogeneous nuclear ribonucleoprotein M	ORF;HNRNPM;HNRPM	10	2	2	2	4	59.965	570	13.648	35593000
Q9H0C8;H7C2I8;E9PC05;F8SNU7	Q9H0C8;H7C2I8;E9PC05;F8SNU7	Integrin-linked kinase-associated serine/threonine phosphatase 2C	ILKAP;ILKAP3	4	2	2	2	5.6	42.906	392	12.532	35535000
B4E0E1;B2R5W3;A0A024R3T8;P09874	B4E0E1;B2R5W3;A0A024R3T8;P09874	Poly [ADP-ribose] polymerase 1	PARP1	4	1	1	1	1.3	111.13	993	7.7939	33404000
D3DNS0;Q6FI97;Q53FS0;O96019	D3DNS0;Q6FI97;Q53FS0;O96019	Actin-like protein 6A	ACTL6A;BAF53A	4	1	1	1	4.4	25.398	226	6.1492	33249000
A0A0U1RRI0;Q06124	A0A0U1RRI0;Q06124	Tyrosine-protein phosphatase non-receptor type 11	PTPN11	2	1	1	1	5.6	22.686	196	6.9668	32855000
C9IZC9;H7BZ75;O75600;F2Z340;A8K228	C9IZC9;H7BZ75;O75600;F2Z340;A8K228	2-amino-3-ketobutyrate coenzyme A ligase, mitochondrial	GCAT	5	2	2	2	11.9	19.177	177	13.668	32308000
X6R6Z1;B4DY09;Q53FG3;F4ZW63;F4ZW62;Q12905	X6R6Z1;B4DY09;Q53FG3;F4ZW63;F4ZW62;Q12905	Interleukin enhancer-binding factor 2	ILF2	6	1	1	1	12.2	12.382	115	9.076	31970000
F8W696;A0A024R3E3;P02647	F8W696;A0A024R3E3;P02647	Apolipoprotein A-I;Proapolipoprotein A-I;Truncated apolipoprotein A-I	APOA1	3	1	1	1	3.7	27.908	245	5.5705	31944000
J3KRL2;H3BPV7;H3BVA8;Q15046	J3KRL2;H3BPV7;H3BVA8;Q15046	Lysine--tRNA ligase	KARS	4	1	1	1	12.7	12.103	102	5.6246	30553000
Q58F26;Q6PJK6;Q08211	Q58F26;Q6PJK6;Q08211	ATP-dependent RNA helicase A	DHX9	3	1	1	1	1.7	67.105	596	5.5169	30396000
A0A024R6K8;P23381	A0A024R6K8;P23381	Tryptophan--tRNA ligase, cytoplasmic;T1-TrpRS;T2-TrpRS	WARS	2	1	1	1	3.4	53.165	471	6.1867	30334000
Q9H8B9;A4FU77;O75643	Q9H8B9;A4FU77;O75643	U5 small nuclear ribonucleoprotein 200 kDa helicase	SNRNP200	3	1	1	1	1.9	87.884	774	10.737	29976000
P21912	P21912	Succinate dehydrogenase [ubiquinone] iron-sulfur subunit, mitochondrial	SDHB	1	1	1	1	3.2	31.629	280	6.1961	29719000
C9J4I3;Q8WW55;Q59H39;P51692	C9J4I3;Q8WW55;Q59H39;P51692	Signal transducer and activator of transcription;Signal transducer and activator of transcription 5B	STAT5B	4	1	1	1	9	18.02	156	8.4962	29311000
E5RIP1;E5RJX2;P60866	E5RIP1;E5RJX2;P60866	40S ribosomal protein S20	RPS20	3	1	1	1	23.9	5.4292	46	5.6229	28918000
Q9Y295	Q9Y295	Developmentally-regulated GTP-binding protein 1	DRG1	1	1	1	1	3.8	40.542	367	7.2274	28117000
A0A024RCW3;Q1JQ76;P62906	A0A024RCW3;Q1JQ76;P62906	Ribosomal protein;60S ribosomal protein L10a	RPL10A	3	1	1	1	6	15.108	133	5.7041	28028000
B4DZC9;Q9H2G2	B4DZC9;Q9H2G2	STE20-like serine/threonine-protein kinase	SLK	2	1	1	1	1	119.86	1048	6.2098	27371000
C9JTY3;C9JUE0;C9JJP5;Q7Z427;Q05BK6;Q7Z426;Q8TDJ5;Q92734	C9JTY3;C9JUE0;C9JJP5;Q7Z427;Q05BK6;Q7Z426;Q8TDJ5;Q92734	Tyrosine-protein kinase receptor;Protein TFG	TFG;TFG/ALK fusion	8	1	1	1	7.8	14.759	128	6.532	27335000
B2R4M6;P06702	B2R4M6;P06702	Protein S100;Protein S100-A9	S100A9	2	1	1	1	13.2	13.21	114	5.6981	26866000
K7EK06;K7ER16;Q6IBR2;Q9Y285	K7EK06;K7ER16;Q6IBR2;Q9Y285	Phenylalanine--tRNA ligase alpha subunit	FARSA;FARSLA	4	1	1	1	6.5	18.389	168	8.4805	26501000
Q9NW36;A0A087WSW7;F6XU50;Q6I7N8;A0A0B4J1V9;Q9NRZ9	Q9NW36;A0A087WSW7;F6XU50;Q6I7N8;A0A0B4J1V9;Q9NRZ9	Lymphoid-specific helicase	HELLS	6	1	1	1	3.2	35.131	310	6.0186	25811000
J3QLE5;Q66K91;Q5XPV6;B4DVS0;X5DP00;Q53HE7;Q9UIS4;Q15182;P63162;P14678;J3KRY3;S4R3P3;Q6LBS1	J3QLE5;Q66K91;Q5XPV6;B4DVS0;X5DP00;Q53HE7;Q9UIS4;Q15182;P63162;P14678;J3KRY3;S4R3P3;Q6LBS1	Small nuclear ribonucleoprotein-associated protein;Small nuclear ribonucleoprotein-associated protein N;Small nuclear ribonucleoprotein-associated proteins B and B	SNRPN;SNRPB	13	2	2	2	9.5	17.546	169	13.645	25178000
E9PNW8;Q9H600;B2RDG1;Q8WVX9	E9PNW8;Q9H600;B2RDG1;Q8WVX9	Fatty acyl-CoA reductase 1	FAR1	4	1	1	1	3.9	37.481	335	9.1078	24831000
A0A2R8YD90;A0A2R8YCS7;Q9Y3Z3	A0A2R8YD90;A0A2R8YCS7;Q9Y3Z3	Deoxynucleoside triphosphate triphosphohydrolase SAMHD1	SAMHD1	3	1	1	1	3.6	47.296	413	6.3257	24197000
H3BR35;Q7KZX8;B2RCT6;A8K2W7;B4DQM6;P15170;Q8IYD1	H3BR35;Q7KZX8;B2RCT6;A8K2W7;B4DQM6;P15170;Q8IYD1	Eukaryotic peptide chain release factor GTP-binding subunit ERF3A;Eukaryotic peptide chain release factor GTP-binding subunit ERF3B	GSPT1;GSPT2	7	1	1	1	1.7	52.832	475	5.496	24098000
B4E231;A0A024R1N5;H0Y720;A0A024R1T4;Q9UPQ9	B4E231;A0A024R1N5;H0Y720;A0A024R1T4;Q9UPQ9	Trinucleotide repeat-containing gene 6B protein	TNRC6B	5	1	1	1	1.8	81.819	762	7.6429	23500000
A0A024QYX0;Q15125	A0A024QYX0;Q15125	3-beta-hydroxysteroid-Delta(8),Delta(7)-isomerase	EBP	2	1	1	1	5.2	26.352	230	7.8794	23156000
B3KW17;H7C5E4;Q8IZH2	B3KW17;H7C5E4;Q8IZH2	5-3 exoribonuclease 1	XRN1	3	1	1	1	1.7	93.609	805	5.9071	23112000
Q6ZMV5	Q6ZMV5	Putative SMEK homolog 3	SMEK3P	1	1	1	1	1.3	95.803	832	6.6828	23072000
A0A087WVQ6;Q00610	A0A087WVQ6;Q00610	Clathrin heavy chain;Clathrin heavy chain 1	CLTC	2	1	1	1	0.5	192.06	1679	6.293	22786000
B4DE77;P04350;B4DJ43;B4DFH6;B4E386;K7ESM5;B3KS31;B4DP54;Q3ZCM7;Q9BUF5;M0R2D3;A0A183YE00;A1L196;M0QY85;M0R042;M0QZL7;M0QYM7;M0R278;M0R1I1;M0R0X0;M0QY37;M0QX14;K7ES63;A0A075B724	B4DE77;P04350;B4DJ43;B4DFH6	Tubulin beta-4A chain	TUBB4A	24	14	1	1	42.3	45.841	409	5.6336	22685000
C9JJZ7;H7BXH8;A0A0S2Z610;B7WPG3;C9IYN3;A8K894;D6W592;A0A0S2Z6K1;A0A0S2Z5U3;Q8WVV9	C9JJZ7;H7BXH8;A0A0S2Z610;B7WPG3;C9IYN3;A8K894;D6W592;A0A0S2Z6K1;A0A0S2Z5U3;Q8WVV9	Heterogeneous nuclear ribonucleoprotein L-like	HNRNPLL;HNRPLL	10	1	1	1	6.7	16.424	149	5.8024	22263000
C9JEL3;B9A044;B8ZZ50;Q59FE1;Q53RG0;O60573	C9JEL3;B9A044;B8ZZ50;Q59FE1;Q53RG0;O60573	Eukaryotic translation initiation factor 4E type 2	EIF4E2;tmp_locus_9	6	1	1	1	6.1	24.602	213	7.1369	22243000
A0A0S2Z5N1;B4DV47;A0A0S2Z5M9;A0A2R8YHB3;Q6P1J9	A0A0S2Z5N1;B4DV47;A0A0S2Z5M9;A0A2R8YHB3;Q6P1J9	Parafibromin	CDC73	5	1	1	1	4.4	26.122	226	6.4268	22199000
Q6P6C2	Q6P6C2	RNA demethylase ALKBH5	ALKBH5	1	3	3	3	11.4	44.255	394	21.754	22107000
Q8N123	Q8N123	CPX chromosomal region candidate gene 1 protein	CPXCR1	1	1	1	1	3.3	34.727	301	5.507	22101000
B4DVQ2;H0Y3K4;Q96EV2	B4DVQ2;H0Y3K4;Q96EV2	RNA-binding protein 33	RBM33	3	1	1	1	1.4	93.983	854	5.8438	21699000
B7Z9U2;B4DH19;B4DGR3;B4DSK5;I3L0N3;B7Z5J7;P46459	B7Z9U2;B4DH19;B4DGR3;B4DSK5;I3L0N3;B7Z5J7;P46459	Vesicle-fusing ATPase	NSF	7	1	1	1	1.5	72.228	650	6.4868	21099000
F8WE98;A6NDY9;A0A087WWY3;Q60FE6;Q60FE5;A0A024R321;O75369;P21333;Q14315	F8WE98;A6NDY9;A0A087WWY3;Q60FE6;Q60FE5;A0A024R321;O75369;P21333;Q14315	Filamin-B;Filamin-A;Filamin-C	FLNA;FLNB;FLNC	9	1	1	1	1.8	66.591	604	6.2862	20007000
A8CLK2;B4DFX9;B4E0I9;Q5GJ54;Q59EV3;A5YM51;V9HWC1;P12883;P13535;Q9UKX3;P13533;P12882;Q9UKX2	A8CLK2;B4DFX9;B4E0I9;Q5GJ54;Q59EV3;A5YM51;V9HWC1;P12883;P13535;Q9UKX3;P13533;P12882;Q9UKX2	Myosin-7;Myosin-8;Myosin-13;Myosin-6;Myosin-1;Myosin-2	MYH7;HEL71;MYH8;MYH13;MYH6;MYH1;MYH2	13	1	1	1	24.4	5.3163	45	6.83	19446000
E7ENZ3;B4DYC8;B7ZAR1;B4DDU6;B4DZT5;B4DXI1;E9PCA1;B4DX08;Q9BU08;V9HW37;P48643;B4DZY9;Q96GI1;B4DE30;H0Y914	E7ENZ3;B4DYC8;B7ZAR1;B4DDU6;B4DZT5;B4DXI1;E9PCA1;B4DX08;Q9BU08;V9HW37;P48643;B4DZY9;Q96GI1;B4DE30	T-complex protein 1 subunit epsilon	CCT5;HEL-S-69	15	3	3	3	7.6	53.848	486	20.936	19376000
Q5VVC8;Q08ES8;Q5VVD0;P62913	Q5VVC8;Q08ES8;Q5VVD0;P62913	60S ribosomal protein L11	RPL11	4	1	1	1	4.8	19.024	167	8.0199	19133000
H0YFX4;A0A024R599;B4E2Z3;F5GZS6;J3KPF3;P08195	H0YFX4;A0A024R599;B4E2Z3;F5GZS6;J3KPF3;P08195	4F2 cell-surface antigen heavy chain	SLC3A2	6	1	1	1	9.8	13.175	122	5.87	19012000
H7C4X2;F8WDT3;F8WAV5;F8WAX2;B7Z972;F6S8N6;A0A0A0MRJ6;H7BY58;P22061	H7C4X2;F8WDT3;F8WAV5;F8WAX2;B7Z972;F6S8N6;A0A0A0MRJ6;H7BY58;P22061	Protein-L-isoaspartate O-methyltransferase;Protein-L-isoaspartate(D-aspartate) O-methyltransferase	PCMT1	9	1	1	1	20.9	7.1214	67	6.2846	18702000
Q9UE37;E9PLF1;E9PHN7;A8HT81;E9PHN6;Q0D2I8;F6XZQ7;P28161	Q9UE37;E9PLF1;E9PHN7;A8HT81;E9PHN6;Q0D2I8;F6XZQ7;P28161	Glutathione S-transferase Mu 2	GSTmu3;GSTM2	8	2	1	1	31.7	9.779	82	5.6049	18692000
H3BV11;H3BRI8;H3BM93;A8K897;H3BVG0;Q8N1F7	H3BV11;H3BRI8;H3BM93;A8K897;H3BVG0;Q8N1F7	Nuclear pore complex protein Nup93	NUP93	6	1	1	1	8.1	15.23	136	7.6631	18492000
A0A2R8Y6J3;B3KTM6;A2RUM7;Q59GX9;P46777	A0A2R8Y6J3;B3KTM6;A2RUM7;Q59GX9;P46777	60S ribosomal protein L5	RPL5	5	1	1	1	4.2	27.045	238	5.8588	17855000
Q9UK59	Q9UK59	Lariat debranching enzyme	DBR1	1	1	1	1	1.8	61.554	544	5.9638	17536000
B4DSR0;E5KNY5;P42704	B4DSR0;E5KNY5;P42704	Leucine-rich PPR motif-containing protein, mitochondrial	LRPPRC	3	1	1	1	1	123.25	1087	6.8355	14482000
Q08AR5;Q99543	Q08AR5;Q99543	DnaJ homolog subfamily C member 2;DnaJ homolog subfamily C member 2, N-terminally processed	DNAJC2	2	1	1	1	3.7	27.856	246	5.7185	13002000
H0YF36;A0A0A0MSW3;A0A024R8B6;P35658	H0YF36;A0A0A0MSW3;A0A024R8B6;P35658	Nuclear pore complex protein Nup214	NUP214	4	1	1	1	15.7	14.232	140	5.8759	12239000
Q13914;C0LYZ4;F1JU33;K4LBP8;K4L955;A0A023PX70;Q59F19;A0A024R8E2;Q59FK4;A9UEZ6;A9UF02;A9UF07;P00519;P42684	Q13914;C0LYZ4;F1JU33;K4LBP8;K4L955;A0A023PX70;Q59F19;A0A024R8E2;Q59FK4;A9UEZ6;A9UF02;A9UF07;P00519;P42684	Non-specific protein-tyrosine kinase;Tyrosine-protein kinase ABL1;Abelson tyrosine-protein kinase 2	ABL1;BCR/ABL fusion;ABL2	14	1	1	1	21.9	6.9689	64	5.5286	12148000
A0A024R6S1;O60884;T2DN57;A0A087WT48	A0A024R6S1;O60884	DnaJ homolog subfamily A member 2	DNAJA2	4	3	3	3	6.3	45.745	412	17.182	11045000
B4E3A8;V9HWH1;P30740	B4E3A8;V9HWH1;P30740	Leukocyte elastase inhibitor	HEL57;SERPINB1	3	1	1	1	2.6	38.685	341	5.7614	10636000
B3KN59;B3KM36;O95816	B3KN59;B3KM36;O95816	BAG family molecular chaperone regulator 2	BAG2	3	1	1	1	4.3	23.748	211	5.7662	3420100
B3KXA5	B3KXA5			1	1	1	1	1.5	54.322	472	-2	0	7
I3L4P1;I3L445;E7EV54;B4DEX7;O15451;A8K548;C9JFV4;B4DR36;Q8IZL8	I3L4P1;I3L445;E7EV54;B4DEX7;O15451;A8K548;C9JFV4;B4DR36;Q8IZL8	Proline-, glutamic acid- and leucine-rich protein 1	PELP1	9	1	1	1	6.1	10.92	99	5.6522	0	63
J3KPU9;Q6ZN79	J3KPU9;Q6ZN79	Zinc finger protein 705A	ZNF705A	2	1	1	1	4.3	24.13	207	5.9584	0	184
A0A140VKD3;B2RCL8;O00327	A0A140VKD3;B2RCL8;O00327	Aryl hydrocarbon receptor nuclear translocator-like protein 1	ARNTL	3	1	1	1	1	68.69	625	-2	0	240
C9JD32;B9ZVP7;J3KT29;Q9BTQ7;A0A024R1Q8;P62829	C9JD32;B9ZVP7;J3KT29;Q9BTQ7;A0A024R1Q8;P62829	60S ribosomal protein L23	RPL23	6	1	1	1	22	9.6694	91	6.562	0
C9K0E3;B4DFV1;A0A087X0I9;A0A024R328;Q05655;Q04759	C9K0E3;B4DFV1;A0A087X0I9;A0A024R328;Q05655;Q04759	Protein kinase C;Protein kinase C delta type;Protein kinase C delta type;Protein kinase C delta type regulatory subunit;Protein kinase C delta type catalytic subunit;Protein kinase C theta type	PRKCD;PRKCQ	6	1	1	1	4.5	25.476	223	5.9958	0
A0A024R4G1;Q8N1G4	A0A024R4G1;Q8N1G4	Leucine-rich repeat-containing protein 47	LRRC47	2	1	1	1	1.9	63.472	583	5.7424	0
A0A024R9Z0;O00483	A0A024R9Z0;O00483	Cytochrome c oxidase subunit NDUFA4	NDUFA4	2	1	1	1	14.8	9.3697	81	7.7417	0
B4DSL6;A8K5D9;A0A024RA49;Q9NQW6;H7C3S1	B4DSL6;A8K5D9;A0A024RA49;Q9NQW6;H7C3S1	Actin-binding protein anillin	ANLN	5	2	2	2	2.4	110.85	1001	14.246	0
A0A024RA94;P55001	A0A024RA94;P55001	Microfibrillar-associated protein 2	MFAP2	2	1	1	1	6	20.825	183	5.6592	0
B3KVA7;B2R8A3;A0A024RAK5;P12532;P17540	B3KVA7;B2R8A3;A0A024RAK5;P12532;P17540	Creatine kinase U-type, mitochondrial;Creatine kinase S-type, mitochondrial	CKMT2;CKMT1A	5	1	1	1	4.5	40.479	356	7.3683	0
B3KWG6;B4E0R6;A0A024RDY0;H0Y8C6;O00410	B3KWG6;B4E0R6;A0A024RDY0;H0Y8C6;O00410	Importin-5	RANBP5;IPO5	5	1	1	1	2.1	81.23	718	8.2222	0
A0A0D9SFE5;Q6DC98;B4DZT3;E9PBF6;P20700	A0A0D9SFE5;Q6DC98;B4DZT3;E9PBF6;P20700	Lamin-B1	LMNB1	5	1	1	1	4.3	37.581	329	12.038	0
D6RB45;A0A1B0GX04;D6R9F3;D6RBS2;D6RCM3;D6REK4;D6R8Z5;Q68E03;D6R991;D6REM6;Q68D11;A0A0R4J2E8;A8MXP9;P43243	D6RB45;A0A1B0GX04;D6R9F3;D6RBS2;D6RCM3;D6REK4;D6R8Z5;Q68E03;D6R991;D6REM6;Q68D11;A0A0R4J2E8;A8MXP9;P43243	Matrin-3	MATR3;DKFZp686L22104;DKFZp686K23100	14	1	1	1	19.1	4.8504	47	7.205	0
A8K787;A0A0S2Z3H3;P12235;A0A0S2Z359;V9GYG0;Q9H0C2;A0A0S2Z3C4;Q59EP7;O75961	A8K787;A0A0S2Z3H3;P12235;A0A0S2Z359;V9GYG0;Q9H0C2	ADP/ATP translocase 1;ADP/ATP translocase 4;ADP/ATP translocase 4, N-terminally processed	SLC25A4;SLC25A31	9	6	1	1	18.5	33.08	298	5.7879	0
A0A0X1KG79;Q15822	A0A0X1KG79;Q15822	Neuronal acetylcholine receptor subunit alpha-2	CHRNA2	2	1	1	1	1.8	57.277	507	5.6514	0
H0YC23;B3KQ51;Q8WZ56;Q6I9T8;Q5U0I7;B3KUN1;B3KRM2;A0A140VJS0;P67775;P62714	H0YC23;B3KQ51;Q8WZ56;Q6I9T8;Q5U0I7;B3KUN1;B3KRM2;A0A140VJS0;P67775;P62714	Serine/threonine-protein phosphatase;Serine/threonine-protein phosphatase 2A catalytic subunit alpha isoform;Serine/threonine-protein phosphatase 2A catalytic subunit beta isoform	PPP2CB;PPP2CA	10	1	1	1	11.3	13.87	124	8.3615	0
A0A2P9ADF8	A0A2P9ADF8			1	1	1	1	2.2	64.301	590	5.9125	0
A0A2R8Y602	A0A2R8Y602			1	3	1	0	10.7	43.351	382	7.6397	0
A0A2R8Y8A7;Q96L92	A0A2R8Y8A7;Q96L92	Sorting nexin-27	SNX27	2	1	1	1	2.2	46.675	407	5.9462	0
A2RUA4;Q8IUE6	A2RUA4;Q8IUE6	Histone H2A;Histone H2A type 2-B	HIST2H2AB	2	1	1	1	5.4	13.686	130	5.8575	0
B7Z9J7;A6NF51;V9HWF9;O95861	B7Z9J7;A6NF51;V9HWF9;O95861	3(2),5-bisphosphate nucleotidase 1	BPNT1;HEL20	4	1	1	1	6.3	27.471	253	8.469	0
F2Z2S8;H0YF32;A7E2S3;H0YCJ7;Q9NQS8;Q53G83;P23396	F2Z2S8;H0YF32;A7E2S3;H0YCJ7;Q9NQS8;Q53G83;P23396	40S ribosomal protein S3	RPS3	7	1	1	1	10.3	13.069	117	7.1918	0
B7ZB32;Q9BR63;A8K666;Q9NSD9	B7ZB32;Q9BR63;A8K666;Q9NSD9	Phenylalanine--tRNA ligase beta subunit	FARSB	4	1	1	1	1.8	54.814	490	6.5049	0
H0YEU5;B4DRT0;Q5JP02;H0YCT5;H0YF10;H0YDK2;E9PC52;Q6FHQ0;A8K6A2;Q16576;Q09028	H0YEU5;B4DRT0;Q5JP02;H0YCT5;H0YF10;H0YDK2;E9PC52;Q6FHQ0;A8K6A2;Q16576;Q09028	Histone-binding protein RBBP7;Histone-binding protein RBBP4	RBBP4;RBBP7	11	1	1	1	4.8	18.992	167	6.7945	0
H9KV93;B3KU32;A8KA77;Q7Z4L5	H9KV93;B3KU32;A8KA77;Q7Z4L5	Tetratricopeptide repeat protein 21B	TTC21B	4	1	1	1	3.5	32.587	283	5.637	0
Q6ICN0;B3KR50;B0LPF3;P62993	Q6ICN0;B3KR50;B0LPF3;P62993	Growth factor receptor-bound protein 2	GRB2	4	1	1	1	5.5	25.148	217	5.8983	0
B1AJY5;B1AJY6	B1AJY5;B1AJY6		PSMD10	2	23	1	1	88.1	20.217	185	23.323	0
Q7L4N0;B1AK87;B1AK85;B2R7T8;B1AK88;B4DWA6;P47756	Q7L4N0;B1AK87;B1AK85;B2R7T8;B1AK88;B4DWA6;P47756	F-actin-capping protein subunit beta	CAPZB	7	1	1	1	25	9.1683	80	7.6121	0
H7BZN1;H7C1T3;C9J2E1;D3DXB2;C9J050;B4E322;B2R8P1;C9JEJ2;P49585	H7BZN1;H7C1T3;C9J2E1;D3DXB2;C9J050;B4E322;B2R8P1;C9JEJ2;P49585	Choline-phosphate cytidylyltransferase A	PCYT1A;hCG_2002711	9	1	1	1	5.8	15.769	137	6.2553	0
Q4W5A6;Q7L8P5;H0YA05;B2RTX2;Q8WX93	Q4W5A6;Q7L8P5;H0YA05;B2RTX2;Q8WX93	Palladin	KIAA0992;DKFZp586L0518;PALLD	5	1	1	1	12.6	11.562	103	9.3004	0
B3KN10;B4DWG1;B3KM47;Q9Y6Y8	B3KN10;B4DWG1;B3KM47;Q9Y6Y8	SEC23-interacting protein	SEC23IP	4	1	1	1	4	42.557	376	5.5963	0
E9PIX6;B4DJ87;E9PKG1;Q99873;E9PMZ2;E9PMW9;E9PNR9;E9PQ98;H0YDE4;Q5U8W9	E9PIX6;B4DJ87;E9PKG1;Q99873;E9PMZ2;E9PMW9;E9PNR9;E9PQ98;H0YDE4;Q5U8W9	Protein arginine N-methyltransferase 1	PRMT1;HRMT1L2	10	2	2	2	8.2	23.836	207	12.042	0
Q9P0B4;B4DSX4;Q6P1Q9	Q9P0B4;B4DSX4;Q6P1Q9	Methyltransferase-like protein 2B	METTL2B	3	1	1	1	6.9	22.391	188	7.3194	0
V9HWD6;B5BU24;P31946;Q2F831	V9HWD6;B5BU24;P31946;Q2F831	14-3-3 protein beta/alpha;14-3-3 protein beta/alpha, N-terminally processed	HEL-S-1;YWHAB	4	3	1	1	8.5	28.082	246	10.089	0
C9JV77;B7Z8Q2;P02765	C9JV77;B7Z8Q2;P02765	Alpha-2-HS-glycoprotein;Alpha-2-HS-glycoprotein chain A;Alpha-2-HS-glycoprotein chain B	AHSG	3	1	1	1	1.9	39.411	368	5.6751	0
F8WCJ1;C9J7B5;C9J4W5;I3L397;I3L504;Q9GZV4;Q6IS14;P63241	F8WCJ1;C9J7B5;C9J4W5;I3L397;I3L504;Q9GZV4;Q6IS14;P63241	Eukaryotic translation initiation factor 5A;Eukaryotic translation initiation factor 5A-2;Eukaryotic translation initiation factor 5A-1-like;Eukaryotic translation initiation factor 5A-1	EIF5A2;EIF5A;EIF5AL1	8	1	1	1	17.1	11.687	105	12.232	0
C9JL85;Q69YG1;P58546	C9JL85;Q69YG1;P58546	Myotrophin	MTPN;DKFZp761E1322	3	1	1	1	19.2	5.7044	52	6.3765	0
D3DUJ0;Q8TA92;Q9Y4W6	D3DUJ0;Q8TA92;Q9Y4W6	AFG3-like protein 2	AFG3L2	3	1	1	1	1.2	84.444	759	7.1402	0
E5RGM3;E7ERH2;F8W8N3;E5RJR5;P63208	E5RGM3;E7ERH2;F8W8N3;E5RJR5;P63208	S-phase kinase-associated protein 1	SKP1	5	1	1	1	12.7	11.575	102	7.8574	0
E9PJT3;E9PJ04;H0YCG1;Q7Z3K9;Q13435	E9PJT3;E9PJ04;H0YCG1;Q7Z3K9;Q13435	Splicing factor 3B subunit 2	SF3B2;DKFZp781L0540	5	1	1	1	3.3	29.134	273	5.6947	0
F4YA14	F4YA14			1	1	1	1	9.9	10.745	91	5.6651	0
Q53GA7;F5H5D3;Q9BQE3;B7Z1K5;A0A1W2PQM2;Q8N532	Q53GA7;F5H5D3;Q9BQE3;B7Z1K5;A0A1W2PQM2;Q8N532	Tubulin alpha-1C chain	TUBA1C	6	12	1	0	35.4	49.823	449	8.9374	0
G3V3Q2;Q53XC8;O43542	G3V3Q2;Q53XC8;O43542	DNA repair protein XRCC3	XRCC3	3	1	1	1	7.8	15.147	141	6.2069	0
L0R8E5;H7C0N4;H7C561	L0R8E5;H7C0N4;H7C561		SF1	3	1	1	1	11.7	11.695	111	9.0781	0
U3KQA4;K7ESF4;Q9BRP1	U3KQA4;K7ESF4;Q9BRP1	Programmed cell death protein 2-like	PDCD2L	3	1	1	1	6.8	14.55	132	5.5736	0
O15541	O15541	RING finger protein 113A	RNF113A	1	1	1	1	2	38.787	343	5.6036	0
O75663	O75663	TIP41-like protein	TIPRL	1	1	1	1	4.4	31.444	272	8.7861	0
Q53R32;P49247	Q53R32;P49247	Ribose-5-phosphate isomerase	RPIA	2	1	1	1	9.6	19.596	177	7.1591	0
P78527	P78527	DNA-dependent protein kinase catalytic subunit	PRKDC	1	2	2	2	1	469.08	4128	14.784	0
Q06210	Q06210	Glutamine--fructose-6-phosphate aminotransferase [isomerizing] 1	GFPT1	1	1	1	1	2.4	78.806	699	6.4042	0
Q4ZG57;Q14566	Q4ZG57;Q14566	DNA replication licensing factor MCM6	MCM6	2	1	1	1	1	88.945	785	6.3749	0
Q53GF0;Q8NFW8	Q53GF0;Q8NFW8	N-acylneuraminate cytidylyltransferase	CMAS	2	1	1	1	3.7	48.329	434	6.7488	0
Q8IUF8	Q8IUF8	Bifunctional lysine-specific demethylase and histidyl-hydroxylase MINA	MINA	1	1	1	1	2.2	52.8	465	5.6156	0
Q8N6N6	Q8N6N6	Protein NATD1	NATD1	1	1	1	1	16.8	13.032	113	14.747	0
Q8WVY7	Q8WVY7	Ubiquitin-like domain-containing CTD phosphatase 1	UBLCP1	1	1	1	1	2.8	36.804	318	6.4322	0
Q96BH1	Q96BH1	E3 ubiquitin-protein ligase RNF25	RNF25	1	1	1	1	2.2	51.218	459	6.6503	0
Q9GZP4	Q9GZP4	PITH domain-containing protein 1	PITHD1	1	1	1	1	3.8	24.178	211	7.2554	0

## Sheet: PSMD10 peptides
Sequence	Length	Missed cleavages	Mass	Proteins	Leading razor protein	Start position	End position	Gene names	Protein names	Unique (Groups)	Charges	PEP	Score	PSM 251	Intensity	Methyl (C) site IDs
LCSGAR	6	0	605.296	A0A140VKD3;B2RCL8;O00327	A0A140VKD3	239	244	ARNTL	Aryl hydrocarbon receptor nuclear translocator-like protein 1	yes	1	0.036027	50.31	1	0	YES
ACGSLK	6	0	577.289	I3L4P1;I3L445;E7EV54;B4DEX7;O15451;A8K548;C9JFV4;B4DR36;Q8IZL8	I3L4P1	62	67	PELP1	Proline-, glutamic acid- and leucine-rich protein 1	yes	1	0.022275	86.344	1	0	YES
KMQVFCK	7	1	882.446	B3KXA5	B3KXA5	2	8			yes	2	0.039991	42.773	1	0	YES
AYTNCFRLR	9	1	1142.57	J3KPU9;Q6ZN79	J3KPU9	180	188	ZNF705A	Zinc finger protein 705A	yes	2	0.011004	53.554	1	0	YES
CPGCYK	6	0	669.261	P42677;H0YMV8;Q71UM5;C9J1C5;C9JLI6	P42677	37	42	RPS27;RPS27L	40S ribosomal protein S27;40S ribosomal protein S27-like	yes	2	0.024927	61.006	1	0	YES
AAAASVTGR	9	0	802.43	Q8NHH1	Q8NHH1	2	10	TTLL11	Tubulin polyglutamylase TTLL11	yes	2	0.011192	54.205	1	45623000
AAAGGQGSAVAAEAEPGKEEPPAR	24	1	2220.08	R4SCQ0;R4SCP5;R4SCF3;R4SCC4;R4S1C5;R4RZ18;R4RYZ7;R4RYY7;Q9GZT9	R4SCQ0	129	152	EGLN1	Egl nine homolog 1	yes	3	0.00012649	50.426	1	61112000
AAAIGIDLGTTYSCVGVFQHGK	22	0	2207.1	A8K5I0;A0A0G2JIW1;P0DMV9;P0DMV8;A0A1U9X7W4;Q59EJ3;B4DWK5;B4DI39;B4E1S9;B4DFN9;B4E388;B4DVU9;V9GZ37;B3KTT5;B4DNX1;B4E1T6;B4DNV4	A8K5I0	4	25	HEL-S-103;HSPA1B;HSPA1A	Heat shock 70 kDa protein 1B;Heat shock 70 kDa protein 1A	yes	2;3	8.0612e-11	88.56	2	0
AAAKGNLK	8	1	771.46	B1AJY5;O75832;B1AJY7	O75832	146	153	PSMD10	26S proteasome non-ATPase regulatory subunit 10	no	2	0.0065573	128.75	1	0
AAAVPVEFQEHHLSEVQNMASEEKLEQVLSSMK	33	1	3694.8	A0A087WZN1;O43837;A0A087X2E5;L0R875;B4DU38	A0A087WZN1	73	105	IDH3B	Isocitrate dehydrogenase [NAD] subunit, mitochondrial;Isocitrate dehydrogenase [NAD] subunit beta, mitochondrial	yes	3;4;5	2.2009e-06	52.198	3	2463100000
AAEEIGIK	8	0	829.455	A0A024R652;F5H2F4;B7Z809;P11586	A0A024R652	59	66	MTHFD1	C-1-tetrahydrofolate synthase, cytoplasmic;Methylenetetrahydrofolate dehydrogenase;Methenyltetrahydrofolate cyclohydrolase;Formyltetrahydrofolate synthetase;C-1-tetrahydrofolate synthase, cytoplasmic, N-terminally processed	yes	2	0.029263	79.451	1	25518000
AAESVSKPDVSEEAPGPSK	19	1	1883.91	A2A2L5;B2RB99;B4DXL5;A0A0A0MQR2;Q9BY42	A2A2L5	234	252	RTFDC1	Protein RTF2 homolog	yes	2;3	3.1112e-06	66.393	2	108910000
AAGGDHGSPDSYR	13	0	1288.54	A0A1B0GWJ0;A0A1B0GTJ7;X5D8S6;Q71UA4;B4DP46;A0A0A6YY92;P30566;A0A096LNY5;X5DP48;X5D2Z4;A0A1B0GTG9;A0A1B0GWF8;X5D7W4;X5D7V4;B4DEP1;A0A1W2PRX2;A0A096LP72;A0A096LNY4	A0A1B0GWJ0	2	14	ADSL	Adenylosuccinate lyase	yes	2	8.8973e-07	83.869	1	0
AAGTLYTYPENWR	13	0	1540.73	Q53YD7;P26641;B4DUK7;Q2F838;B4DSR4	Q53YD7	2	14	EEF1G	Elongation factor 1-gamma	yes	2	6.0068e-06	91.584	1	63828000
AAHSEGNTTAGLDMR	15	0	1529.69	V9HW96;P78371;Q9H369;B7Z4R3	V9HW96	467	481	HEL-S-100n;CCT2	T-complex protein 1 subunit beta	yes	2	0.0044154	54.259	1	94568000
AAPGAEFAPNK	11	0	1071.53	A8K525;A0A0S2Z4Z9;Q15233	A8K525	457	467	NONO	Non-POU domain-containing octamer-binding protein	yes	2	0.014371	56.916	1	46016000
AAPGAEFAPNKR	12	1	1227.64	A8K525;A0A0S2Z4Z9;Q15233	A8K525	457	468	NONO	Non-POU domain-containing octamer-binding protein	yes	2	5.8203e-05	83.948	1	132280000
AAQAPSSFQLLYDLK	15	0	1650.86	A0A024R652;F5H2F4;B7Z809;P11586	A0A024R652	805	819	MTHFD1	C-1-tetrahydrofolate synthase, cytoplasmic;Methylenetetrahydrofolate dehydrogenase;Methenyltetrahydrofolate cyclohydrolase;Formyltetrahydrofolate synthetase;C-1-tetrahydrofolate synthase, cytoplasmic, N-terminally processed	yes	2	8.0921e-05	91.961	1	75314000
AASIFGGAKPVDTAAR	16	1	1530.82	Q7Z5Y0;F8VX11;B4DS01;B4DEP6;E7EX17;B4DRM3;P23588	Q7Z5Y0	95	110	EIF4B	Eukaryotic translation initiation factor 4B	yes	2	9.222e-07	83.182	2	62481000
AASLEAVSYAIDTLK	15	0	1550.82	A0A024QZS1;O96007	A0A024QZS1	145	159	MOCS2	Molybdopterin synthase catalytic subunit	yes	2	0.0055574	63.727	1	49063000
AATASAGAGGIDGKPR	16	1	1398.72	I3L1P8;Q6IBH0;Q02978	I3L1P8	2	17	SLC25A11	Mitochondrial 2-oxoglutarate/malate carrier protein	yes	2	5.4229e-07	125.97	1	366290000
AAVESLGFILFR	12	0	1321.74	Q99460;B2R6D0;A0A087WW66;Q05CW6;Q05BX4;H7C378	Q99460	617	628	PSMD1	26S proteasome non-ATPase regulatory subunit 1	yes	2	1.4116e-07	164.57	1	110220000
AAVEWFDGKDFQGSK	15	1	1683.79	H7BY36;A0A0D9SFL3;B0QYK0;C9JGE3;Q01844	H7BY36	81	95	EWSR1	RNA-binding protein EWS	yes	2;3	5.7743e-07	114.86	2	148450000
AAVKDVEEEKFPTQLSR	17	2	1946.01	A0MNN4;Q2TAY7	A0MNN4	191	207	SMU1	WD40 repeat-containing protein SMU1;WD40 repeat-containing protein SMU1, N-terminally processed	yes	3	7.9055e-06	73.168	1	68586000
AAVLLEQER	9	0	1027.57	E9PJT3;E9PJ04;H0YCG1;Q7Z3K9;Q13435	E9PJT3	183	191	SF3B2;DKFZp781L0540	Splicing factor 3B subunit 2	yes	2	0.020199	82.452	1	0
AAYFGIYDTAK	11	0	1218.59	Q6NVC0;P05141	Q6NVC0	214	224	SLC25A5	ADP/ATP translocase 2;ADP/ATP translocase 2, N-terminally processed	yes	2	0.0011049	83.948	1	83744000
ADAPVALVVHMAPASVLVDSR	21	0	2117.13	B3KSU9;G5E9D5;B3KT00;B4DT15;A0A0S2Z5M8;Q9BQ52;H7C2I4	B3KSU9	93	113	ELAC2	Zinc phosphodiesterase ELAC protein 2	yes	3	0.0046194	39.171	1	60500000
ADEASELACPTPK	13	0	1330.61	A0A0U1RQF0;P49327	A0A0U1RQF0	2192	2204	FASN	Fatty acid synthase;[Acyl-carrier-protein] S-acetyltransferase;[Acyl-carrier-protein] S-malonyltransferase;3-oxoacyl-[acyl-carrier-protein] synthase;3-oxoacyl-[acyl-carrier-protein] reductase;3-hydroxyacyl-[acyl-carrier-protein] dehydratase;Enoyl-[acyl-carrier-protein] reductase;Oleoyl-[acyl-carrier-protein] hydrolase	yes	2	3.9819e-06	90.685	1	0
ADEGISFR	8	0	893.424	Q06830;A0A0A0MSI0;B2R4P2	Q06830	121	128	PRDX1	Peroxiredoxin-1	yes	2	1.0356e-07	170.73	1	154300000
ADGQVAELLLR	11	0	1183.66	K7EK06;K7ER16;Q6IBR2;Q9Y285	K7EK06	2	12	FARSA;FARSLA	Phenylalanine--tRNA ligase alpha subunit	yes	2	3.3077e-05	147.75	1	26501000
ADHDFVVQEDFMK	13	0	1579.7	A0A087X2I1;P62333;V9HW24	A0A087X2I1	371	383	PSMC6;HEL-S-73	26S protease regulatory subunit 10B	yes	3	1.0903e-05	84.169	1	45789000
ADTLDPALLRPGR	13	1	1393.77	A8K2M0;P43686	A8K2M0	314	326	PSMC4	26S protease regulatory subunit 6B	yes	2	0.00071147	123.35	1	96883000
AEAGDNLGALVR	12	0	1184.61	P49411	P49411	316	327	TUFM	Elongation factor Tu, mitochondrial	yes	2	6.3225e-08	166.16	1	87667000
AEDKEWMPVTK	11	1	1332.64	E9PQD7;Q6IPX5;Q3KQT6;P15880;E9PMM9;Q8N5L9;D3DU83;E9PPT0;Q8NI61	E9PQD7	55	65	RPS2;OK/KNS-cl.7	40S ribosomal protein S2	yes	2	0.020815	65.933	1	45021000
AELRDDPIISTHLAK	15	1	1677.9	O00231	O00231	311	325	PSMD11	26S proteasome non-ATPase regulatory subunit 11	yes	2;3	3.6185e-07	106.26	2	665030000
AENYDIPSADR	11	0	1249.56	A0A024R1A3;P22314;B4DDE4;B4DL67;Q8WY81;Q5JRR6;B3KUJ2	A0A024R1A3	870	880	UBE1;UBA1	Ubiquitin-like modifier-activating enzyme 1	yes	2	0.016857	54.982	1	129290000
AESMLQQADK	10	0	1119.52	B4DPW9;Q53GY0;P13797;A0A0A0MSQ0;Q96HI1;B4DG31;H7C4N2	B4DPW9	310	319	PLS3	Plastin-3	yes	2	0.0018616	122.13	1	943760000
AEYLCR	6	0	753.348	Q15008;B3KT66;C9J0E9;C9J7B7	Q15008	108	113	PSMD6	26S proteasome non-ATPase regulatory subunit 6	yes	2	0.017147	113.82	1	0
AFAMIIDKLEEDISSSMTNSTAASRPPVTLR	31	2	3350.68	B4DRD7;H3BRU6;F8VZX2;Q15366;F8VXH9;B4DLC0;F8W0G4;F8W1G6;H3BND9	B4DRD7	33	63	PCBP2	Poly(rC)-binding protein 2	yes	3;4	1.123e-22	108.1	2	165200000
AFDSGIIPMEFVNK	14	0	1566.78	A0A024R1Y2;A0A024R1T9;Q4LE36;P53396;Q8N9C4	A0A024R1Y2	939	952	ACLY;ACLY variant protein	ATP-citrate synthase	yes	2	0.0045416	69.979	1	87511000
AFGFSHLEALLDDSKELQR	19	1	2175.1	F5GYN4;J3KR44;F5H6Q1;F5GYJ8;B4DPD5;Q96FW1	F5GYN4	65	83	OTUB1	Ubiquitin thioesterase OTUB1	yes	3	1.0468e-09	111.01	1	89281000
AFLADPSAFVAAAPVAAATTAAPAAAAAPAK	31	0	2751.46	Q6NSF2;F8VWS0;Q53HW2;Q53HK9;A8K4Z4;A0A024RBS2;P05388;B4E3D5;F8W1K8;Q3MHV2	Q6NSF2	204	234	RPLP0	60S acidic ribosomal protein P0	yes	3	0.0002076	48.422	1	96183000
AFLDALQNQAEASSK	15	0	1591.78	Q8N9Z3;K0A7K7;Q9BV61;Q59EK6;Q53G55;Q53FS6;A0A140VJY2;Q12931	Q8N9Z3	175	189	TRAP1	Heat shock protein 75 kDa, mitochondrial	yes	2	3.3227e-09	89.403	1	0
AFQYVETHGEVCPANWTPDSPTIKPSPAASK	31	1	3327.59	P30048	P30048	218	248	PRDX3	Thioredoxin-dependent peroxide reductase, mitochondrial	yes	4	0.00080154	41.434	1	0
AFVDFLSDEIKEER	14	1	1696.83	Q07021;A8K651	Q07021	81	94	C1QBP	Complement component 1 Q subcomponent-binding protein, mitochondrial	yes	2;3	2.6944e-06	107.37	2	238380000
AFYPEEISSMVLTK	14	0	1613.8	A8K5I0;A0A0G2JIW1;P0DMV9;P0DMV8;A0A1U9X7W4;B4DNT8;Q59EJ3;B4DWK5;B4DI39;Q9UQC1;Q53FA3;B2RCQ9;A0A1U9X7X9;A0A1U9X7X4;A0A1U9X7W7;B4DI54;P34931;B4DXY3	A8K5I0	113	126	HEL-S-103;HSPA1B;HSPA1A;HSP70-1;HSPA1L	Heat shock 70 kDa protein 1B;Heat shock 70 kDa protein 1A;Heat shock 70 kDa protein 1-like	yes	2;3	6.6751e-06	90.653	2	2095300000
AGAIAPCEVTVPAQNTGLGPEK	22	0	2122.07	Q6NSF2;F8VWS0;Q53HW2;Q53HK9;A8K4Z4;A0A024RBS2;P05388;F8VQY6;F8VPE8;F8VRK7;G3V210;F8VU65;B4E3D5;Q8NHW5;F8VW21	Q6NSF2	112	133	RPLP0;RPLP0P6	60S acidic ribosomal protein P0;60S acidic ribosomal protein P0-like	yes	2	1.1147e-09	77.527	1	0
AGGAAVVITEPEHTK	15	0	1478.77	A5PLK7;A0A024RAC5;Q9P258	A5PLK7	13	27	RCC2	Protein RCC2	yes	2	5.6646e-07	91.549	1	141310000
AGGIETIANEFSDR	14	0	1478.7	A0A024RDQ0;A0A024RDS1;Q92598;R4GN69	A0A024RDQ0	20	33	HSPH1	Heat shock protein 105 kDa	yes	2	2.0656e-05	103.31	1	102970000
AGKPVICATQMLESMIK	17	1	1818.94	H3BTN5;V9HWB8;A0A024R5Z9;P14618;B4DRT3;Q8WUW7;Q504U3;H3BR70;B4DNK4	H3BTN5	320	336	PKM;HEL-S-30;PKM2	Pyruvate kinase;Pyruvate kinase PKM	yes	2	0.0013583	53.967	1	0
AGLLGLLEEMR	11	0	1200.65	A8CLK2;B4DFX9;B4E0I9;Q5GJ54;Q59EV3;A5YM51;V9HWC1;P12883;P13535;Q9UKX3;P13533;P12882;Q9UKX2	A8CLK2	5	15	MYH7;HEL71;MYH8;MYH13;MYH6;MYH1;MYH2	Myosin-7;Myosin-8;Myosin-13;Myosin-6;Myosin-1;Myosin-2	yes	2	0.0014792	124.98	1	19446000
AGPESDAQYQFTGIK	15	0	1610.76	Q96IX5	Q96IX5	2	16	USMG5	Up-regulated during skeletal muscle growth protein 5	yes	2	3.7303e-06	129	1	73686000
AGVMALANLLQIQR	14	0	1496.85	G3V4C6;Q5RLJ0;Q549M8;Q9Y224;H0YJB9	G3V4C6	132	145	C14orf166	UPF0568 protein C14orf166	yes	2	7.1205e-05	127.3	1	132830000
AHSAAAVPLGALEQGCPIR	19	0	1859.97	Q8N6N6	Q8N6N6	2	20	NATD1	Protein NATD1	yes	2	1.7927e-11	140.39	1	0
AHTDVGPGPESSPVLVR	17	0	1716.88	Q59FI2;H0Y6Z7;P10586;Q5W9G3	Q59FI2	342	358	PTPRF;LAR	Receptor-type tyrosine-protein phosphatase F	yes	2	4.9387e-09	143.42	1	83060000
AIACLLFGGSR	11	0	1106.59	B1AHB0;P33992;Q53FG5;A8K521;B1AHB1;B4DQ39;B3KVF0;B4DVK5;Q59F49	B1AHB0	352	362	MCM5	DNA helicase;DNA replication licensing factor MCM5	yes	2	6.7864e-05	101.25	1	0
AICTEAGLMALR	12	0	1247.64	Q53XL8;Q53HB3;P62191	Q53XL8	397	408	PSMC1	26S protease regulatory subunit 4	yes	2	0.00013512	110.87	1	0
AIEALHGHELRPGR	14	1	1554.84	A0A0S2Z4Z0;Q96PK6;A0A0A6YYI9;A0A0S2Z5V2;F8WDX3;A0A0A0MSL8;A0A0S2Z567;B8ZZ74	A0A0S2Z4Z0	51	64	RBM14;RBM14-RBM4	RNA-binding protein 14	yes	3	0.0015845	54.871	1	34284000
AILCLLLGGVER	12	0	1255.73	Q53HJ4;B2R7C5;A0A0S2Z4T1;P25205;Q8NHX6;B4DUQ9;J3KQ69;A0A0S2Z492;B4DS46	Q53HJ4	316	327	MCM3;HCC5	DNA helicase;DNA replication licensing factor MCM3	yes	2	7.7382e-05	137.95	1	0
AILVDLEPGTMDSVR	15	0	1614.83	B7ZAF0;Q5JP53;Q5SU16;P07437;Q6LC01;B4DY90;B2R6L0;B4DMJ5;A5D907;A5D906;Q9BVA1;Q13885	B7ZAF0	34	48	TUBB;TUBB2A;TUBB2B	Tubulin beta chain;Tubulin beta-2B chain;Tubulin beta-2A chain	no	2	8.6032e-06	116.55	1	699060000
AINCATSGVVGLVNCLR	17	0	1688.87	A0A0U1RQF0;P49327;Q6PJJ3	A0A0U1RQF0	1443	1459	FASN	Fatty acid synthase;[Acyl-carrier-protein] S-acetyltransferase;[Acyl-carrier-protein] S-malonyltransferase;3-oxoacyl-[acyl-carrier-protein] synthase;3-oxoacyl-[acyl-carrier-protein] reductase;3-hydroxyacyl-[acyl-carrier-protein] dehydratase;Enoyl-[acyl-carrier-protein] reductase;Oleoyl-[acyl-carrier-protein] hydrolase	yes	2	2.485e-07	118.48	1	0
AIQLEYSEARR	11	1	1334.69	Q6IBN0;O43242;B3KNN7;Q96N86;B4DV84;B4DEB0;B4DPM7;Q8N9M2	Q6IBN0	297	307	PSMD3	26S proteasome non-ATPase regulatory subunit 3	yes	2	0.0019401	110.41	1	80546000
AIRDGVIEASINHEK	15	1	1650.87	Q6IBN0;O43242;B3KNN7;Q96N86;B4DV84;B4DEB0;B4DPM7;Q8N9M2;O95325	Q6IBN0	441	455	PSMD3	26S proteasome non-ATPase regulatory subunit 3	yes	3	0.036926	24.881	1	279870000
AITAVALK	8	0	785.501	Q9NQX4	Q9NQX4	799	806	MYO5C	Unconventional myosin-Vc	yes	2	0.015977	95.793	1	196870000
AITIAGIPQSIIECVK	16	0	1654.93	B4DRD7;H3BRU6;F8VZX2;Q15366;F8VXH9;B4DLC0;F8VRH0	B4DRD7	107	122	PCBP2	Poly(rC)-binding protein 2	yes	2	5.645e-07	109.6	1	0
AKDPFAHLPK	10	1	1122.62	Q53YD7;P26641;B4DUP0	Q53YD7	276	285	EEF1G	Elongation factor 1-gamma	yes	3	0.023869	41.109	1	39763000
AKFEELNMDLFR	12	1	1511.74	V9HWB4;P11021	V9HWB4	325	336	HEL-S-89n;HSPA5	78 kDa glucose-regulated protein	yes	2;3	1.2439e-07	133.81	2	318290000
AKPPPGGGEQEPPPPPAPQDVEMKEEAATGGGSTGEADGK	40	2	3866.79	Q6IBN0;O43242;B4DPM7	Q6IBN0	15	54	PSMD3	26S proteasome non-ATPase regulatory subunit 3	yes	4	0.0062648	34.08	1	145060000
ALADLVHSHIQSNELCSK	18	0	1963.98	B4DSA4;Q7KZA3;Q53FU1;Q5TZY0;P22830	B4DSA4	238	255	DKFZp686P18130;FECH	Ferrochelatase;Ferrochelatase, mitochondrial	yes	3	2.0333e-06	71.558	1	0
ALALTGNQGIEAAMDWLMEHEDDPDVDEPLETPLGHILGR	40	0	4368.07	E9PRQ7;A0A024R598;Q04323;E9PJ81;A0A024R539;B4DU88;B4DNC6	E9PRQ7	23	62	UBXN1;LOC51035	UBX domain-containing protein 1	yes	4	0.0035224	35.973	1	109050000
ALASLGK	7	0	658.401	B3KSU9;G5E9D5;B3KT00;B4DT15;A0A0S2Z5M8;Q9BQ52;B4E365;E7ES68	B3KSU9	325	331	ELAC2	Zinc phosphodiesterase ELAC protein 2	yes	1	0.014047	90.986	1	78413000
ALCWVCAQSR	10	0	1135.53	P19474	P19474	109	118	TRIM21	E3 ubiquitin-protein ligase TRIM21	yes	2	0.00023849	138.78	1	0
ALDEGDIALLK	11	0	1156.63	A0A140VK70;P35998;C9JLS9	A0A140VK70	24	34	PSMC2	26S protease regulatory subunit 7	yes	2	7.1425e-05	148.52	1	232640000
ALDGPEQMELEEGKAGSGLR	20	1	2086	A0A140VJS3;P62195;J3QQM1;J3QSE0;J3KTQ9	A0A140VJS3	2	21	PSMC5	26S protease regulatory subunit 8	yes	2	5.8694e-09	92.457	1	201010000
ALEFAPACHR	10	0	1113.54	K7ER44;K7EPP7;K7ESP1;K7EIH8;B7Z9W6;Q59EH7;A8K4T2;Q99615;B4DKK3	K7ER44	112	121	DNAJC7	DnaJ homolog subfamily C member 7	yes	2	0.016156	47.082	1	0
ALEHSALAINHK	12	0	1302.7	P17812;B4E1E0;B4DMB5;A0A024RC00;Q9NRF8	P17812	320	331	CTPS1;CTPS2	CTP synthase 1;CTP synthase;CTP synthase 2	yes	2	0.00014316	140.14	1	35956000
ALESAVQHETLNYIGLLDCVAEYQGK	26	0	2863.41	Q9BQP7;Q5QPE8	Q9BQP7	221	246	MGME1	Mitochondrial genome maintenance exonuclease 1	yes	3	0.00061291	47.018	1	0
ALESSIAPIVIFASNR	16	0	1686.93	B5BUB1;Q9Y265;J3QLR1;H7C4G5;E7ETR0;B3KRS7;H7C4I3	B5BUB1	318	333	RUVBL1	RuvB-like 1	yes	2	0.0020023	58.04	1	31501000
ALGSEVQDASK	11	0	1103.55	B4DZC9;Q9H2G2	B4DZC9	641	651	SLK	STE20-like serine/threonine-protein kinase	yes	2	0.0061681	65.157	1	27371000
ALGTEVIQLFPEK	13	0	1443.8	O95831	O95831	325	337	AIFM1	Apoptosis-inducing factor 1, mitochondrial	yes	2	1.8786e-05	94.692	1	69196000
ALIAAQYSGAQVR	13	0	1346.73	Q53YD7;P26641;B4DUK7;Q2F838;B4DSR4	Q53YD7	18	30	EEF1G	Elongation factor 1-gamma	yes	2	0.00014233	127.4	1	17237000
ALIAGGGAPEIELALR	16	0	1549.88	B7Z9L0;B7Z2Z8;A8K3C3;P50991;B7Z2F4	B7Z9L0	364	379	CCT4	T-complex protein 1 subunit delta	yes	2	4.6664e-07	96.103	1	49320000
ALIEVLQPLIAEHQAR	16	0	1800.03	A0A024R6K8;P23381	A0A024R6K8	433	448	WARS	Tryptophan--tRNA ligase, cytoplasmic;T1-TrpRS;T2-TrpRS	yes	3	0.0065062	45.14	1	30334000
ALKDFVASIDATYAK	15	1	1611.85	Q53HJ4;B2R7C5;A0A0S2Z4T1;P25205;Q8NHX6;B4DUQ9;J3KQ69;A0A0S2Z492;B4DS46	Q53HJ4	79	93	MCM3;HCC5	DNA helicase;DNA replication licensing factor MCM3	yes	3	0.0010016	55.815	1	24724000
ALLANALTSALR	12	0	1212.72	D6RAA6;A6QKW0;A0A024R9W7;P57088	D6RAA6	58	69	TMEM33;SHINC3	Transmembrane protein 33	yes	2	1.2458e-19	196.88	1	67799000
ALLELQLEPEELYQTFQR	18	0	2219.15	P13639;Q6PK56;B4DPU3;B4DRE8;B4DMC6	P13639	163	180	EEF2	Elongation factor 2	yes	2	5.956e-10	131.13	1	99737000
ALLQQQPEDDSKR	13	1	1526.77	Q96K98;Q96K97;B4DVI7;Q9UHB9	Q96K98	145	157	SRP68	Signal recognition particle subunit SRP68	yes	2	0.0020324	67.207	1	50584000
ALLTPVAIAAGR	12	0	1151.7	V9HW90;P00390	V9HW90	380	391	HEL-75;GSR	Glutathione reductase, mitochondrial	yes	2	0.00061187	131.41	1	34119000
ALLVEPVINSYLLAER	16	0	1799.02	B4DIT7;B4DTN7;V9HWG3;P21980	B4DIT7	484	499	HEL-S-45;TGM2	Protein-glutamine gamma-glutamyltransferase 2	yes	2	1.5203e-07	88.441	1	36693000
ALQSVGQIVGEVLK	14	0	1439.83	A0A087X2I1;P62333;V9HW24;H0YJC0;H0YJE9;H0YJT1	A0A087X2I1	63	76	PSMC6;HEL-S-73	26S protease regulatory subunit 10B	yes	2	1.1865e-05	97.911	1	496910000
ALSAIADLLTNEHER	15	0	1651.85	Q96FS1;Q68DU0;C9JZR2;O60716;Q7KZJ3;A0A024R4Z0;A0A024R4Y7	Q96FS1	602	616	CTNND1;DKFZp781O2021	Catenin delta-1	yes	3	9.0929e-12	166.38	1	115090000
ALSSQHQAR	9	0	996.51	V9HWB4;P11021	V9HWB4	298	306	HEL-S-89n;HSPA5	78 kDa glucose-regulated protein	yes	2	0.0026201	132.09	1	56315000
ALTDYR	6	0	737.371	O00231	O00231	305	310	PSMD11	26S proteasome non-ATPase regulatory subunit 11	yes	2	0.04101	130.84	1	68186000
ALTGDAAIQPR	11	0	1111.6	O43824	O43824	313	323	GTPBP6	Putative GTP-binding protein 6	yes	2	0.00021727	101.64	1	68340000
ALTVPELTQQMFDAK	15	0	1690.86	B4DE77;P04350;B4DJ43;B4DFH6;Q8IZ29;Q8IWP6;P68371;Q8N6N5;B3KML9;Q96HX0	Q8IZ29	283	297	TUBB4A;TUBB2C;TUBB4B	Tubulin beta-4A chain;Tubulin beta-4B chain	no	2	3.3593e-07	89.548	1	116440000
ALTVPELTQQMFDSK	15	0	1706.85	Q9BVA1;Q13885;A0A024QZU2;O43209;B7Z4N1;Q9UGA2	Q9BVA1	283	297	TUBB2B;TUBB2A;DKFZp566F223	Tubulin beta-2B chain;Tubulin beta-2A chain	yes	2	6.8126e-06	121.08	1	87137000
ALTVPELTQQVFDAK	15	0	1658.89	B7ZAF0;Q5JP53;Q5SU16;P07437;Q5ST81;B4DY90;B7ZAK1;Q9BUU9;B4E052;B4DQN9;Q96B85;B4DXZ5;B4DMU8;Q1KSF8	B7ZAF0	254	268	TUBB;XTP3TPATP1	Tubulin beta chain	yes	2	7.1841e-05	72.531	1	917860000
ALVDHENVISCPHLGASTK	19	0	1989.99	A0A286YFL2;A0A286YFA2;B3KSC3;A0A286YF22;A0A2C9F2M7;V9HW79;O43175;A0A286YF78;Q9UMY2;Q8N5M8	A0A286YFL2	271	289	HEL-S-113;PHGDH;PGDH3	D-3-phosphoglycerate dehydrogenase	yes	3	0.0064427	41.615	1	0
ALVNQLHER	9	0	1078.59	A0A140VK29;Q9HCC0;A0A0G2JM88;D6R9R1;D6RDF7;A0A0S2Z5R4	A0A140VK29	51	59	MCCC2	Methylcrotonoyl-CoA carboxylase beta chain, mitochondrial	yes	2	0.020334	71.379	1	48153000
AMLDQLMGTSR	11	0	1221.58	Q9Y383;B3KSL5;Q75M91;V9GZ75;F8WEU3	Q9Y383	9	19	LUC7L2;CGI-59;C7orf55-LUC7L2	Putative RNA-binding protein Luc7-like 2	yes	2	1.2779e-06	155.95	1	93141000
AMQDAEVSKSDIGEVILVGGMTR	23	1	2405.19	B7Z4V2;V9HW84;P38646;Q8N1C8;B7Z1V7;B7Z4T3;A1XP52;H0YBG6	B7Z4V2	355	377	HEL-S-124m;HSPA9	Stress-70 protein, mitochondrial	yes	2	3.8052e-07	74.257	1	0
ANDDIIVNWVNR	12	0	1427.72	B4DPW9;Q53GY0;P13797;A0A0A0MSQ0;Q96HI1;B4DG31;B4DI60;A7E2S2	B4DPW9	492	503	PLS3	Plastin-3	yes	2	0.00067414	117.7	1	307860000
APGFGDNR	8	0	832.383	A0A024R3X4;P10809;B3GQS7;B7Z5E7;B7Z4F6;B7Z597;B7Z532	A0A024R3X4	302	309	HSPD1	60 kDa heat shock protein, mitochondrial	yes	2	0.016323	97.033	1	24664000
APGIIPR	7	0	722.444	V9HW26;P25705;K7EJP1;B4DGW3;K7ENJ4;K7ERX7;K7EK77;A0A2P9ARL3	V9HW26	176	182	HEL-S-123m;ATP5A1	ATP synthase subunit alpha;ATP synthase subunit alpha, mitochondrial	yes	2	0.03867	84.025	1	13118000
APILIATDVASR	12	0	1225.7	A0A1X7SBZ2;A0A1W2PQ51;Q59F66;Q92841;B4DZQ7;A0A0U1RQJ0;B4DN41;J3KTA4;B5BUE6;P17844;Q7Z2V5;Q59E92;B4DNG2	A0A1X7SBZ2	469	480	DDX17;DDX5;DKFZp686J01190	Probable ATP-dependent RNA helicase DDX17;Probable ATP-dependent RNA helicase DDX5	no	2	5.9496e-06	96.89	1	0
APLPDLYPFGTMR	13	0	1476.74	A0A1X7SBZ2;A0A1W2PQ51;Q59F66;Q92841	A0A1X7SBZ2	69	81	DDX17	Probable ATP-dependent RNA helicase DDX17	yes	2	0.0019816	81.771	1	194070000
APLVPPGSPVVNALFR	16	0	1632.94	A0A140VK73;Q9NPH2;B3KSG0;B7Z3K3;J3QS51	A0A140VK73	466	481	ISYNA1	Inositol-3-phosphate synthase 1	yes	2	2.4821e-06	113.63	1	124340000
APPPGLPAETIKDLMR	16	1	1704.92	F8VYH9;F8VTV8;F8VWX7;A0A024RBB6;P11802;F8VXD2;F8VZZ0;F8VZ51;Q6LC83	F8VYH9	107	122	CDK4	Cyclin-dependent kinase 4	yes	3	2.4151e-07	102.65	1	38362000
APQETYADIGGLDNQIQEIK	20	0	2202.08	Q53XL8;Q53HB3;P62191;G3V4X1	Q53XL8	179	198	PSMC1	26S protease regulatory subunit 4	yes	2;3	3.736e-10	83.423	2	690150000
APQHTAVGFK	10	0	1054.56	Q6IBN0;O43242;B3KNN7;Q96N86;B4DV84;B4DEB0;B4DPM7	Q6IBN0	316	325	PSMD3	26S proteasome non-ATPase regulatory subunit 3	yes	2	0.007828	73.665	1	567360000
APVQPQQSPAAAPGGTDEKPSGK	23	1	2217.1	Q59EG8;Q13200;B4DM22;Q9NSM5;C9JPC0;F8WBS8	Q59EG8	14	36	PSMD2;DKFZp564A2282	26S proteasome non-ATPase regulatory subunit 2	yes	3	9.0249e-06	62.589	1	82709000
APVQVIHR	8	0	918.54	A0A024R5N4;F5H0C4;Q9BRP4	A0A024R5N4	296	303	WDR71;PAAF1	Proteasomal ATPase-associated factor 1	yes	2	0.0015917	106.76	1	0
AQAAAPASVPAQAPK	15	0	1376.74	A0A024R326;Q6IPI1;P47914	A0A024R326	133	147	RPL29	60S ribosomal protein L29	yes	2	0.000244	63.624	1	58030000
AQAALQAVNSVQSGNLALAASAAAVDAGMAMAGQSPVLR	39	0	3679.88	P26599;A6NLN1;A0A0U1RRM4;Q59H49;A0A087WU68	P26599	147	185	PTBP1	Polypyrimidine tract-binding protein 1	yes	3	3.6834e-21	89.742	1	292620000
AQCPIVER	8	0	914.464	M0R0F0;Q53G25;A0A024R4Q8;M0R0R2;P46782;Q59EK8	M0R0F0	64	71	RPS5	40S ribosomal protein S5;40S ribosomal protein S5, N-terminally processed	yes	2	0.032984	77.923	1	0
AQDEIPALSVSRPQTGLSFLGPEPEDLEDLYSR	33	1	3628.79	A8K2M0;P43686	A8K2M0	11	43	PSMC4	26S protease regulatory subunit 6B	yes	3;4	3.8725e-10	73.817	2	1338800000
AQFEGIVTDLIR	12	0	1360.74	B7Z4V2;V9HW84;P38646;Q8N1C8;B7Z1V7;B7Z4T3;A1XP52;H0YBG6	B7Z4V2	335	346	HEL-S-124m;HSPA9	Stress-70 protein, mitochondrial	yes	2	0.00058289	82.261	2	1029600000
AQIHDLVLVGGSTR	14	0	1464.8	A8K5I0;A0A0G2JIW1;P0DMV9;P0DMV8;A0A1U9X7W4;B4DNT8;Q59EJ3;B4DWK5;B4DI39;B4E1S9;B4DFN9;B4E388;B4DVU9;V9GZ37;B3KTT5	A8K5I0	329	342	HEL-S-103;HSPA1B;HSPA1A	Heat shock 70 kDa protein 1B;Heat shock 70 kDa protein 1A	yes	2;3	6.5183e-06	103.13	2	372030000
AQPSSASYQPVPADPFAIVSR	21	0	2187.1	Q4VCS5;A6NP16;A2BDD9;E7ERM3	Q4VCS5	413	433	AMOT	Angiomotin	yes	2	0.020461	39.163	1	70879000
AQQLEQIR	8	0	984.535	A0A140VK73;Q9NPH2	A0A140VK73	201	208	ISYNA1	Inositol-3-phosphate synthase 1	yes	2	0.014813	91.626	1	72084000
AQSLLSTDR	9	0	989.514	O00231;B4DTS5;J3QRY4	O00231	12	20	PSMD11	26S proteasome non-ATPase regulatory subunit 11	yes	2	0.0034788	124.98	1	262110000
AQSLLSTDREASIDILHSIVK	21	1	2295.24	O00231;B4DTS5;J3QRY4	O00231	12	32	PSMD11	26S proteasome non-ATPase regulatory subunit 11	yes	4	0.033014	23.873	1	51214000
AQSLLSTDREASIDILHSIVKR	22	2	2451.34	O00231;B4DTS5;J3QRY4	O00231	12	33	PSMD11	26S proteasome non-ATPase regulatory subunit 11	yes	4	0.00080922	48.315	1	40434000
AQTEGINISEEALNHLGEIGTK	22	0	2323.17	B5BUB1;Q9Y265;J3QLR1;H7C4G5	B5BUB1	379	400	RUVBL1	RuvB-like 1	yes	3	3.3589e-05	70.352	1	0
AQVADVVVSR	10	0	1042.58	A0A0U1RQF0;P49327	A0A0U1RQF0	1073	1082	FASN	Fatty acid synthase;[Acyl-carrier-protein] S-acetyltransferase;[Acyl-carrier-protein] S-malonyltransferase;3-oxoacyl-[acyl-carrier-protein] synthase;3-oxoacyl-[acyl-carrier-protein] reductase;3-hydroxyacyl-[acyl-carrier-protein] dehydratase;Enoyl-[acyl-carrier-protein] reductase;Oleoyl-[acyl-carrier-protein] hydrolase	yes	2	0.012422	66.299	1	58445000
ARFEELCSDLFR	12	1	1484.71	A8K5I0;A0A0G2JIW1;P0DMV9;P0DMV8;A0A1U9X7W4;B4DNT8;Q59EJ3;B4DWK5;B4DI39;B4E1S9;B4DFN9;B4E388;B4DVU9;V9GZ37;B3KTT5;B4DNV4;B4DHP5;Q53FC7;B3KSM6;B2R6X5;P17066;P48741	A8K5I0	300	311	HEL-S-103;HSPA1B;HSPA1A;HSPA6;HSPA7	Heat shock 70 kDa protein 1B;Heat shock 70 kDa protein 1A;Heat shock 70 kDa protein 6;Putative heat shock 70 kDa protein 7	no	2;3	1.7914e-10	173.04	2	0
ARFEELNADLFR	12	1	1479.75	V9HW22;Q53GZ6;P11142;E9PKE3;Q96IS6;B3KTV0;Q53HF2;E9PNE6;E9PN89;B4E1Q1;A8K7Q2;A0A024R6B5;P54652	V9HW22	300	311	HEL-S-72p;HSPA8;HSPA2	Heat shock cognate 71 kDa protein;Heat shock-related 70 kDa protein 2	yes	2;3	8.5471e-26	248.05	2	556670000
ARPAEVGGMQLR	12	1	1283.68	H0YMM5;H0YNJ9;H0YNW5;H0YKC5;H0YKI0;P33316	H0YMM5	19	30	DUT	Deoxyuridine 5-triphosphate nucleotidohydrolase, mitochondrial	yes	2	0.0018076	110.39	1	60192000
ARPFPDGLAEDIDKGEVSAR	20	2	2142.07	P13639;Q8TA90;B4DPU3;Q6W6M8	P13639	606	625	EEF2	Elongation factor 2	yes	3	3.2889e-16	161.51	2	208560000
ASAAQLR	7	0	715.398	A0A024R4T4;P61081	A0A024R4T4	27	33	UBE2M	NEDD8-conjugating enzyme Ubc12	yes	2	0.02069	127.66	1	0
ASEMAGPPQMPNDFLSFQDIATEAAHPIR	29	0	3140.47	Q6P2Q9	Q6P2Q9	1058	1086	PRPF8	Pre-mRNA-processing-splicing factor 8	yes	3	0.017998	29.906	1	27007000
ASGFEESMK	9	0	984.422	Q6P2Q9;B4DK16;I3L3Z8;Q6JH02;Q6JH03	Q6P2Q9	1506	1514	PRPF8	Pre-mRNA-processing-splicing factor 8	yes	2	0.030598	71.379	1	27985000
ASLPTLGFTHFQPAQLTTVGK	21	0	2213.18	A0A1B0GWJ0;A0A1B0GTJ7;X5D8S6;Q71UA4;B4DP46;A0A0A6YY92;P30566;A0A096LNY6;A0A096LNY5;X5DP48;X5D2Z4;A0A1B0GTG9;A0A1B0GWF8;A8K4X6	A0A1B0GWJ0	150	170	ADSL	Adenylosuccinate lyase	yes	3	0.011708	26.84	1	96032000
ASTNIQDTEGNTPLHLACDEER	22	0	2413.08	B1AJY5;O75832;B1AJY7	O75832	163	184	PSMD10	26S proteasome non-ATPase regulatory subunit 10	no	2;3;4	3.4243e-13	101.36	7	2149800000
ASTNIQDTEGNTPLHLACDEERVEEAK	27	1	2969.37	B1AJY5;O75832;B1AJY7	O75832	163	189	PSMD10	26S proteasome non-ATPase regulatory subunit 10	no	2;3;4	1.7693e-17	163.41	4	31370000000
ATAEVLNIGKK	11	1	1142.67	E9PBS1;A0A024RD93;P22234;B4DGX3	E9PBS1	2	12	PAICS	Multifunctional protein ADE2;Phosphoribosylaminoimidazole-succinocarboxamide synthase;Phosphoribosylaminoimidazole carboxylase	yes	2	2.8092e-05	144.09	1	30519000
ATAGDTHLGGEDFDNR	16	0	1674.72	A8K5I0;A0A0G2JIW1;P0DMV9;P0DMV8;A0A1U9X7W4;B4DNT8;Q59EJ3;B4DWK5;B4DI39;B4E1S9;B4DFN9;B4E388;B4DVU9;V9GZ37;B3KTT5;Q9UQC1;B4DNV4;B4DHP5;Q53FA3;B2RCQ9;A0A1U9X7X9;A0A1U9X7X4;A0A1U9X7W7;B4DI54;P34931;B4DXY3;Q53FC7;B3KSM6;B2R6X5;P17066;P48741	A8K5I0	221	236	HEL-S-103;HSPA1B;HSPA1A;HSP70-1;HSPA1L;HSPA6;HSPA7	Heat shock 70 kDa protein 1B;Heat shock 70 kDa protein 1A;Heat shock 70 kDa protein 1-like;Heat shock 70 kDa protein 6;Putative heat shock 70 kDa protein 7	no	2;3	0.00040426	83.182	2	674730000
ATAVMPDGQFK	11	0	1163.56	Q06830;A0A0A0MSI0;B2R4P2	Q06830	17	27	PRDX1	Peroxiredoxin-1	yes	2	0.003409	60.828	1	0
ATAVVDGAFK	10	0	977.518	B4DF70;V9HW12;P32119;A6NIW5;A0A024R7F2	B4DF70	17	26	HEL-S-2a;PRDX2	Peroxiredoxin-2	yes	2	0.0053719	79.059	1	59783000
ATENDIYNFFSPLNPMR	17	0	2027.94	P55795;B4DFK9;B4DP00	P55795	300	316	HNRNPH2	Heterogeneous nuclear ribonucleoprotein H2	yes	2	7.9873e-07	110.66	1	124560000
ATENDIYNFFSPLNPVR	17	0	1995.97	B4DKS8;A0A024R7T3;P52597;E9PCY7;G8JLB6;P31943;H0YB39;B4DP51;H0YBG7;Q68DG4;H0YBD7	E9PCY7	300	316	HNRPF;HNRNPF;HNRNPH1;DKFZp686A15170	Heterogeneous nuclear ribonucleoprotein F;Heterogeneous nuclear ribonucleoprotein F, N-terminally processed;Heterogeneous nuclear ribonucleoprotein H;Heterogeneous nuclear ribonucleoprotein H, N-terminally processed	no	2	5.6565e-07	106.49	1	486780000
ATMAMRDSR	9	1	1037.47	F4YA14	F4YA14	30	38			yes	2	0.02162	46.016	1	0
ATQLLEGLVQELQK	14	0	1568.88	C9J4I3;Q8WW55;Q59H39;P51692	C9J4I3	57	70	STAT5B	Signal transducer and activator of transcription;Signal transducer and activator of transcription 5B	yes	2	3.1901e-05	104.79	1	29311000
ATSFLLALEPELEAR	15	0	1658.89	F8WF32;Q96HX3;Q6IBR0;Q53EP4;P04843	F8WF32	66	80	RPN1	Dolichyl-diphosphooligosaccharide--protein glycosyltransferase subunit 1	yes	2	1.3756e-06	85.813	1	44877000
AVAHHTDCTFIR	12	0	1369.66	A0A140VJS3;P62195;Q59GS3;J3KRP2;J3QSA9;J3QQM1;J3QLH6;J3QRW1;J3QRR3	A0A140VJS3	202	213	PSMC5	26S protease regulatory subunit 8	yes	2;3	5.7817e-05	90.653	2	0
AVAHHTTAAFIR	12	0	1293.69	A8K2M0;P43686	A8K2M0	218	229	PSMC4	26S protease regulatory subunit 6B	yes	2;3	0.00010683	111.46	2	4070900000
AVANQTSATFLR	12	0	1277.67	Q53XL8;Q53HB3;P62191	Q53XL8	238	249	PSMC1	26S protease regulatory subunit 4	yes	2	2.86e-42	232.46	1	165110000
AVANTMR	7	0	761.385	E7ENZ3;B4DYC8;B7ZAR1;B4DDU6;B4DZT5;B4DXI1;E9PCA1;B4DX08;Q9BU08;V9HW37;P48643;H0Y914	E7ENZ3	43	49	CCT5;HEL-S-69	T-complex protein 1 subunit epsilon	yes	2	0.022011	141.98	1	0
AVAVVVDPIQSVK	13	0	1323.78	A0A140VKF2;O00487;Q4ZG77	A0A140VKF2	140	152	PSMD14	26S proteasome non-ATPase regulatory subunit 14	yes	2	1.9969e-05	95.573	1	35739000
AVCMLSNTTAIAEAWAR	17	0	1806.88	B3KT06;B3KPS3;P68363;A8JZY9;P68366;B4DDU2;B4DN58;Q15670	B3KT06	339	355	TUBA1B;TUBA4A	Tubulin alpha-1B chain;Tubulin alpha-4A chain	no	2	3.0465e-07	114.72	1	0
AVEEEDKMTPEQLAIK	16	1	1829.91	A0A140VKF2;O00487;Q53TH1;Q59G89;Q96DE8	A0A140VKF2	258	273	PSMD14	26S proteasome non-ATPase regulatory subunit 14	yes	2;3	0.00014558	98.156	2	411920000
AVFPSIVGRPR	11	1	1197.7	Q8WVW5;Q53GK6;Q53G99;Q53G76;Q1KLZ0;P63261;P60709;B4DVQ0;B4DW52;B4E335;B4E3A4;A0A2R8Y793;I3L3I0;I3L1U9;I3L4N8;B3KUD3;A1E282;G5E9R0;K7EM38;E7EVS6;I3L3R2;A0A2R8YGF8;J3KT65;Q6S8J3;A5A3E0;C9JUM1;C9JZR7;P0CG38;C9JTX5;F8WCH0;B7Z6P1;A8K3K1;P68133;P68032;Q7Z7J6;A6NL76;D2JYH4;P63267;P62736;Q13707;B3KW67;F8WB63;B8ZZJ2;C9JFL5;F6UVQ4;F6QUT6;B7Z6I1	Q8WVW5	17	27	PS1TP5BP1;ACTG1;ACTB;POTEE;POTEF;POTEI;ACTG2;ACTA1;ACTC1;ACTA2	Actin, cytoplasmic 2;Actin, cytoplasmic 2, N-terminally processed;Actin, cytoplasmic 1;Actin, cytoplasmic 1, N-terminally processed;POTE ankyrin domain family member E;POTE ankyrin domain family member F;POTE ankyrin domain family member I;Actin, alpha skeletal muscle;Actin, alpha cardiac muscle 1;Actin, gamma-enteric smooth muscle;Actin, aortic smooth muscle	no	2;3	3.7749e-09	170.66	3	581210000
AVFVDLEPTVIDEVR	15	0	1700.9	B3KT06;B3KPS3;P68363;A8JZY9;F8VVB9;F8VQQ4;B4DN58;F8VX09;F8VWV9;F8VRZ4;F8VS66;F8VRK0;Q53GA7;F5H5D3;Q9BQE3;B7Z1K5;A0A1W2PQM2;Q8N532	B3KT06	30	44	TUBA1B;TUBA1A;TUBA1C	Tubulin alpha-1B chain;Tubulin alpha-1C chain	no	2	2.0809e-06	134.75	1	452450000
AVGDGIVLCK	10	0	973.527	B4DPW9;Q53GY0;P13797;A0A0A0MSQ0;U3KQI3	B4DPW9	132	141	PLS3	Plastin-3	yes	2	0.002726	71.501	1	0
AVGPTAEADKSAAEK	15	1	1443.72	Q9Y3Z5;D6REL4;Q9H4P6;E7EQZ7;Q9UK43;Q95HA6;B2R5Y4;Q13123	Q9Y3Z5	128	142	DKFZp564B112;IK;CSA2	Protein Red	yes	2	0.014996	56.087	1	88882000
AVGVQCPVCR	10	0	1030.51	Q96BH1	Q96BH1	193	202	RNF25	E3 ubiquitin-protein ligase RNF25	yes	2	0.0022373	73.324	1	0
AVITSLLDQIPEMFADTR	18	0	2019.03	B4DSN3;G5EA31;A0A024QZM6;P53992	B4DSN3	477	494	SEC24C	Protein transport protein Sec24C	yes	3	0.018259	34.274	1	18942000
AVLIAGQPGTGK	12	0	1110.64	B4DW30;X6R2L4;Q9Y230;M0QXI6;M0R0Y3;B3KNL2	B4DW30	72	83	RUVBL2	RuvB-like 2	yes	2	0.00030028	88.496	1	100570000
AVLSAEQLRDEEVHAGLGELLR	22	1	2404.27	A0A024R5K8;P50454;E9PJH8;E9PIG2;E9PRS3;E9PNX1;E9PK86;E9PMI5;E9PR70;E9PPV6;E9PQ34	A0A024R5K8	95	116	SERPINH1	Serpin H1	yes	3;4	7.2604e-15	137.64	2	324230000
AVLVDLEPGTMDSVR	15	0	1600.81	B4DE77;P04350;B4DJ43;Q3ZCM7;A0A183YE00;M0QY85;M0QZL7;M0R278;M0R0X0;M0QY37;M0QX14;A0A075B724;Q8IZ29;Q8IWP6;P68371;Q8N6N5;B3KML9;B4DNW1	Q8IZ29	63	77	TUBB4A;TUBB8;TUBB2C;TUBB4B	Tubulin beta-4A chain;Tubulin beta-8 chain;Tubulin beta-4B chain	no	2	6.9848e-05	72.652	1	119490000
AVQGFFTSNNATR	13	0	1411.68	Q6IBN0;O43242;B3KNN7;Q96N86;B4DV84;B4DEB0;B4DPM7;Q8N9M2	Q6IBN0	116	128	PSMD3	26S proteasome non-ATPase regulatory subunit 3	yes	2	5.6573e-06	141.88	1	229930000
AVVIVDDR	8	0	885.492	A8K525;A0A0S2Z4Z9;Q15233;H7C367;C9IZL7;Q9BSV4;Q86VG2;P23246;Q6PIX2	A8K525	177	184	NONO;SFPQ	Non-POU domain-containing octamer-binding protein;Splicing factor, proline- and glutamine-rich	no	2	0.0048657	117.93	1	0
AVVPSYIPLVK	11	0	1184.72	P36551	P36551	360	370	CPOX	Oxygen-dependent coproporphyrinogen-III oxidase, mitochondrial	yes	2	0.042701	47.198	1	46941000
AYFHLLNQIAPK	12	0	1413.78	B4DPW9;Q53GY0;P13797;A0A0A0MSQ0;Q96HI1;H7C4N2;C9JAM8;Q14651	B4DPW9	274	285	PLS3;PLS1	Plastin-3;Plastin-1	yes	2;3	0.00016435	109.21	2	156530000
AYLPVNESFGFTADLR	16	0	1798.89	P13639;Q8TA90;B4DPU3	P13639	786	801	EEF2	Elongation factor 2	yes	2	4.6664e-07	96.103	4	184810000
AYTNFDAER	9	0	1085.48	V9HW65;A0A024R5Z7;P07355;H0YMD0;H0YMU9;H0YN42;H0YKS4;B4DNH8;A6NMY6;H0YMM1;H0YKZ7;H0YLV6;H0YMT9;H0YKX9;H0YKL9;H0YMW4;H0YMD9;H0YKV8;H0YNB8;H0YKN4	V9HW65	29	37	HEL-S-270;ANXA2;ANXA2P2	Annexin;Annexin A2;Putative annexin A2-like protein	yes	2	0.003587	122.74	1	75469000
AYTNFDAERDALNIETAIK	19	1	2154.06	V9HW65;A0A024R5Z7;P07355;H0YMD0;H0YMU9;H0YN42;H0YKS4;B4DNH8;A6NMY6;H0YMM1;H0YKZ7;H0YLV6;H0YMT9;H0YKX9;H0YKL9;H0YMW4;H0YMD9;H0YKV8;H0YNB8;H0YKN4	V9HW65	29	47	HEL-S-270;ANXA2;ANXA2P2	Annexin;Annexin A2;Putative annexin A2-like protein	yes	3	2.202e-05	50.178	1	61660000
CCTESLVNR	9	0	1023.45	C9JKR2;H0YA55;D6RHD5;B7WNR0;B4DPR2;F6KPG5;A0A0C4DGB6;A8K9P0;B2RBS8;B4DPP6;P02768;A0A087WWT3	C9JKR2	308	316	ALB	Serum albumin	yes	2	0.0027125	84.568	1	0
CDKEFMWALK	10	1	1269.59	C9JL85;Q69YG1;P58546	C9JL85	2	11	MTPN;DKFZp761E1322	Myotrophin	yes	2	0.0042025	69.825	1	0
CDVDIRK	7	1	847.422	Q8WVW5;Q53GK6;Q53G99;Q53G76;Q1KLZ0;P63261;P60709;B4DVQ0;B4DW52;B4E335;B4E3A4;A0A2R8Y793;B3KWQ3;Q6PJ43;B7ZAP6;Q96DE1;Q96FU6;V9HVZ7;F1BXA6;A4UCT3;A5GZ75;Q562R1;Q9UE89	Q8WVW5	273	279	PS1TP5BP1;ACTG1;ACTB;HEL-176;ACTBL2	Actin, cytoplasmic 2;Actin, cytoplasmic 2, N-terminally processed;Actin, cytoplasmic 1;Actin, cytoplasmic 1, N-terminally processed;Beta-actin-like protein 2	yes	2	0.0085936	97.068	1	0
CEFDSQASAPR	11	0	1209.51	G3V3Q2;Q53XC8;O43542	G3V3Q2	16	26	XRCC3	DNA repair protein XRCC3	yes	2	0.0062105	53.751	1	0
CEFFNAGGSVK	11	0	1157.52	P0DN79;P35520;B7Z2D6;C9JMA6;B7Z6W5;Q9NTF0	P0DN79	109	119	CBS;DKFZp727E011	Cystathionine beta-synthase	yes	2	9.343e-05	98.249	1	0
CEFQDAYVLLSEK	13	0	1543.72	A0A024R3X4;P10809;B3GQS7;B7Z5E7;B7Z4F6;B7Z597;B9VPB4;B9VP19;Q53QD5	A0A024R3X4	237	249	HSPD1	60 kDa heat shock protein, mitochondrial	yes	2	2.3179e-05	79.693	1	0
CEFQDAYVLLSEKK	14	1	1671.82	A0A024R3X4;P10809;B3GQS7;B7Z5E7;B7Z4F6;B7Z597;B9VPB4;B9VP19;Q53QD5	A0A024R3X4	237	250	HSPD1	60 kDa heat shock protein, mitochondrial	yes	3	0.00088007	57.414	1	0
CELLYEGPPDDEAAMGIK	18	0	1949.88	P13639;Q8TA90;Q6PK56;B4DRE8;B4DMC6	P13639	369	386	EEF2	Elongation factor 2	yes	2	1.5717e-09	118.87	1	0
CFIVGADNVGSK	12	0	1208.59	Q6NSF2;F8VWS0;Q53HW2;Q53HK9;A8K4Z4;A0A024RBS2;P05388;F8VQY6;F8VPE8;F8VRK7;G3V210;F8VU65;Q8NHW5;F8VWV4;F8VS58;F8VZS0	Q6NSF2	27	38	RPLP0;RPLP0P6	60S acidic ribosomal protein P0;60S acidic ribosomal protein P0-like	yes	2	5.2646e-05	104.39	1	0
CGSVLVR	7	0	732.395	E9PQD7;Q6IPX5;Q3KQT6;P15880;H0YEN5;E9PMM9;Q8J014;Q8N5L9;I3L404;E9PM36	E9PQD7	130	136	RPS2;rps2	40S ribosomal protein S2	yes	2	0.0077152	92.191	1	0
CGVTSVPDIR	10	0	1045.52	Q9H0C8;H7C2I8;F8SNU7	Q9H0C8	301	310	ILKAP;ILKAP3	Integrin-linked kinase-associated serine/threonine phosphatase 2C	yes	2	0.002726	71.501	1	0
CIPALDSLTPANEDQK	16	0	1713.82	A0A024R3X4;P10809;B3GQS7;B7Z5E7;B7Z4F6;B7Z597	A0A024R3X4	447	462	HSPD1	60 kDa heat shock protein, mitochondrial	yes	2	0.0078329	47.288	1	0
CLDDHKYK	8	1	1020.47	Q99460;B2R6D0;A0A087WW66;Q05CW6;Q05BX4;C9J9M4;H7BZR6	Q99460	141	148	PSMD1	26S proteasome non-ATPase regulatory subunit 1	yes	2	0.012443	85.265	1	0
CLIATGGTPR	10	0	987.517	O95831;Q5RZ99;Q5RZA0	O95831	256	265	AIFM1	Apoptosis-inducing factor 1, mitochondrial	yes	2	0.00049518	105.57	1	0
CMPTFQFFK	9	0	1147.52	H9ZYJ2;P10599	H9ZYJ2	73	81	TXN	Thioredoxin	yes	2	0.013576	54.157	1	0
CNEIINWLDK	10	0	1246.6	V9HW22;Q53GZ6;P11142;E9PKE3;Q96IS6;B3KTV0;E9PNE6;B4E1Q1;A8K7Q2;E9PS65;Q96BE0;E9PM13;Q96H53;Q9NZ87;Q9NWW3	V9HW22	574	583	HEL-S-72p;HSPA8	Heat shock cognate 71 kDa protein	yes	2	0.0037576	65.933	1	0
CNLLAEK	7	0	789.405	C9JV77;B7Z8Q2;P02765	C9JV77	220	226	AHSG	Alpha-2-HS-glycoprotein;Alpha-2-HS-glycoprotein chain A;Alpha-2-HS-glycoprotein chain B	yes	2	0.021129	69.176	1	0
CPEALFQPSFLGMESCGIHETTFNSIMK	28	0	3116.41	Q8WVW5;Q53GK6;Q53G99;Q53G76;Q1KLZ0;P63261;P60709;B4DVQ0;B4DW52;B4E335;B4E3A4;A0A2R8Y793;B3KWQ3;Q6PJ43;B7ZAP6;Q96DE1;Q96FU6;V9HVZ7;F1BXA6;A4UCT3;A5GZ75	Q8WVW5	245	272	PS1TP5BP1;ACTG1;ACTB;HEL-176	Actin, cytoplasmic 2;Actin, cytoplasmic 2, N-terminally processed;Actin, cytoplasmic 1;Actin, cytoplasmic 1, N-terminally processed	yes	3	0.00060959	44.931	1	0
CPLDPYFIMPDK	12	0	1437.67	B1AHB0;P33992;Q53FG5;A8K521;B1AHB1;B4DQ39;B3KVF0;B4DVK5;B1AHB2	B1AHB0	207	218	MCM5	DNA helicase;DNA replication licensing factor MCM5	yes	2	0.00047513	72.325	1	0
CQEVISWLDANTLAEKDEFEHK	22	1	2604.22	A8K5I0;A0A0G2JIW1;P0DMV9;P0DMV8;A0A1U9X7W4;B4DNT8;Q59EJ3;B4DWK5;B4DI39;B4E1S9;B4DFN9;B4E388;B4DVU9;V9GZ37;B3KTT5;B4DNX1;B4E1T6	A8K5I0	574	595	HEL-S-103;HSPA1B;HSPA1A	Heat shock 70 kDa protein 1B;Heat shock 70 kDa protein 1A	yes	2;3;4	2.0392e-13	89.668	3	0
CSEGSFLLTTFPR	13	0	1456.7	A8K525;A0A0S2Z4Z9;Q15233;H7C367	A8K525	208	220	NONO	Non-POU domain-containing octamer-binding protein	yes	2	2.6839e-05	106.62	1	0
CSLVRPK	7	1	801.453	Q53HJ4;B2R7C5;A0A0S2Z4T1;P25205;Q8NHX6;B4DUQ9;J3KQ69;A0A0S2Z492;B4DS46	Q53HJ4	134	140	MCM3;HCC5	DNA helicase;DNA replication licensing factor MCM3	yes	2	0.031737	84.359	1	0
CSNPLDTSVK	10	0	1062.5	P17812;B4E1E0;B7Z9C4;B4DMB5	P17812	218	227	CTPS1	CTP synthase 1;CTP synthase	yes	2	0.0013242	90.15	1	0
CSPIGVYTSGK	11	0	1110.54	B1AHB0;P33992;Q53FG5;A8K521;B1AHB1;B4DQ39;B3KVF0;B4DVK5;Q59F49	B1AHB0	397	407	MCM5	DNA helicase;DNA replication licensing factor MCM5	yes	2	0.0018747	63.184	1	0
CSVLAAANSVFGR	13	0	1293.65	B1AHB0;P33992;Q53FG5;A8K521;B1AHB1;B4DQ39;B3KVF0;B4DVK5;Q59F49	B1AHB0	482	494	MCM5	DNA helicase;DNA replication licensing factor MCM5	yes	2	2.5364e-05	106.29	1	0
CTWQLGR	7	0	862.412	P0DN79;P35520;C9JMA6	P0DN79	52	58	CBS	Cystathionine beta-synthase	yes	2	0.0021971	142.74	1	0
CVDFQTLK	8	0	952.469	B1AHB0;P33992;Q53FG5;A8K521;B1AHB1;B4DQ39;B3KVF0;B4DVK5;B1AHB2	B1AHB0	221	228	MCM5	DNA helicase;DNA replication licensing factor MCM5	yes	2	0.014257	68.787	1	0
DAGQISGLNVLR	12	0	1241.67	B7Z4V2;V9HW84;P38646;Q8N1C8;B7Z1V7;B7Z4T3	B7Z4V2	193	204	HEL-S-124m;HSPA9	Stress-70 protein, mitochondrial	yes	2	1.8949e-06	112.8	1	0
DAGTIAGLNVLR	12	0	1198.67	V9HW22;Q53GZ6;P11142;E9PKE3;Q96IS6;B3KTV0;Q53HF2;E9PN89;B4E1Q1;E9PQQ4;E9PQK7;E9PK54;E9PLF4;B4DTX2;E9PI65;A4D111	V9HW22	160	171	HEL-S-72p;HSPA8;LOC401308	Heat shock cognate 71 kDa protein	yes	2	2.5798e-10	174.02	1	513930000
DAGVIAGLNVLR	12	0	1196.69	A8K5I0;A0A0G2JIW1;P0DMV9;P0DMV8;A0A1U9X7W4;B4DNT8;Q59EJ3;B4DWK5;B4DI39;B4E1S9;B4DVU9;Q9UQC1;Q53FA3;B2RCQ9;A0A1U9X7X9;A0A1U9X7X4;A0A1U9X7W7;B4DI54;P34931;B4DXY3	A8K5I0	160	171	HEL-S-103;HSPA1B;HSPA1A;HSP70-1;HSPA1L	Heat shock 70 kDa protein 1B;Heat shock 70 kDa protein 1A;Heat shock 70 kDa protein 1-like	yes	2	0.0059801	60.828	1	204250000
DALSDLALHFLNK	13	0	1455.77	B7Z9L0;B7Z2Z8;A8K3C3;P50991;B7Z2F4	B7Z9L0	251	263	CCT4	T-complex protein 1 subunit delta	yes	2;3	0.0003617	99.013	2	42489000
DCHEEVYAGSHQYPGR	16	0	1846.77	A0A024R3P9;Q9H3P7	A0A024R3P9	486	501	ACBD3	Golgi resident protein GCP60	yes	3	1.3943e-05	71.08	1	0
DCLINAAK	8	0	846.427	P17987;F5H136;E7ERF2;F5H7Y1	P17987	146	153	TCP1	T-complex protein 1 subunit alpha	yes	2	0.028506	49.058	1	0
DDAGWSPLHIAASAGRDEIVK	21	1	2207.1	O75832	O75832	70	90	PSMD10	26S proteasome non-ATPase regulatory subunit 10	yes	2;3;4	1.2792e-11	124.16	5	8353400000
DEFRPNLSHTGR	12	1	1427.69	B4DRD4;A8K0I0;A0A024R1C1;Q13356	B4DRD4	331	342	PPIL2	Peptidyl-prolyl cis-trans isomerase-like 2	yes	3	0.0049371	50.314	1	46060000
DEPDWESLIFLAR	13	0	1589.77	B4DUT7;Q53F90;A0A140VJK6;P49915	B4DUT7	485	497	GMPS	GMP synthase [glutamine-hydrolyzing]	yes	2	0.0085501	52.79	1	0
DFLAGGVAAAISK	13	0	1218.66	Q6NVC0;P05141	Q6NVC0	36	48	SLC25A5	ADP/ATP translocase 2;ADP/ATP translocase 2, N-terminally processed	yes	2	0.005194	58.274	3	43753000
DFLLKPELLR	10	1	1242.73	B4DX78;O00148;K7EPJ3;K7EQN7;A0A024R7H0;Q5STU3;A0A024RCM3;Q13838;A0A286SD68;A0A286SD67;A0A286SD65;A0A286SD64;A0A286SD63;A0A286SD59;A0A286SD52;K7ENP6;A0A0G2JHN7;K7EL56;K7EIL8;F6U6E2;K7EN69;F6S2B7;F6SXL5;B4DH55;Q7KYK3;B4DF34;F6QYI9;A0A0G2JJL7;F6R6M7;F6S4E6;A0A0A0MT12;F6TRA5;F6WLT2;Q59G92	B4DX78	91	100	DDX39A;DDX39;DDX39B;hCG_2005638;BAT1	ATP-dependent RNA helicase DDX39A;Spliceosome RNA helicase DDX39B	yes	2	0.0074597	121.05	1	103200000
DGAGFLINLIDSPGHVDFSSEVTAALR	27	0	2800.4	P13639;Q6PK56;B4DPU3;B4DRE8;B4DMC6	P13639	94	120	EEF2	Elongation factor 2	yes	3	0.025041	26.659	1	136810000
DGNASGTTLLEALDCILPPTRPTDKPLR	28	2	2963.54	Q6IPT9;Q6IPS9;Q6IPN6;Q53HR5;Q53HQ7;Q53HM9;Q5VTE0;P68104;Q96RE1;A0A087WVQ9;A8K9C4;Q53GA1;Q53GE9;Q53G85;Q8IUB0;B4DNE0;B4DV42;Q504Z0;Q53HR1;A0A087WV01;Q9H2I7;Q53G89;Q96C29;Q8TBL1;Q6P082;Q96CD8;Q6P4C9	Q6IPT9	220	247	EEF1A1;EEF1A1P5;EEF1A1L14	Elongation factor 1-alpha;Putative elongation factor 1-alpha-like 3;Elongation factor 1-alpha 1	yes	3;4	2.1967e-18	117.82	2	0
DGQILPVPNVVVR	13	0	1404.81	A5PLK7;A0A024RAC5;Q9P258	A5PLK7	256	268	RCC2	Protein RCC2	yes	2	0.0014113	63.283	1	58995000
DHPPIPITDLADNIER	16	0	1814.92	Q59FI2;H0Y6Z7;P10586;H0Y4H1;H0Y7Z9;Q5W9G3;Q7Z3X4;B3KWM1;B3KXA8;H0Y380;B3KXJ7	Q59FI2	973	988	PTPRF;LAR;DKFZp686B1310	Receptor-type tyrosine-protein phosphatase F;Protein-tyrosine-phosphatase	yes	2;3	6.208e-08	139.89	2	243020000
DHQPCIIFMDEIDAIGGR	18	0	2028.94	A0A087X2I1;P62333;V9HW24;H0YJX2	A0A087X2I1	238	255	PSMC6;HEL-S-73	26S protease regulatory subunit 10B	yes	3	1.6244e-10	129.88	1	0
DHYEATAMHR	10	0	1229.52	B1AJY5;B1AJY6;O75832;B1AJY7	O75832	136	145	PSMD10	26S proteasome non-ATPase regulatory subunit 10	no	1;2;3	1.3619e-17	221.7	52	78104000000
DHYEATAMHRAAAK	14	1	1570.73	B1AJY5;B1AJY6;O75832;B1AJY7	O75832	136	149	PSMD10	26S proteasome non-ATPase regulatory subunit 10	no	2	0.006664	86.189	1	170800000
DIKDTTVGTLSQR	13	1	1432.75	P51665;B2RD27;B4DXI8	P51665	178	190	PSMD7	26S proteasome non-ATPase regulatory subunit 7	yes	2	8.5032e-06	149.96	1	269340000
DISCLNRDPAR	11	1	1258.61	Q0VAB1;A0A024R0M6;Q3ZCQ8;M0R2Q2;M0R1Y4;M0R003	Q0VAB1	336	346	TIMM50	Mitochondrial import inner membrane translocase subunit TIM50	yes	2	0.00015958	103.56	1	0
DKPHVNVGTIGHVDHGK	17	1	1808.93	P49411;H3BNU3	P49411	54	70	TUFM	Elongation factor Tu, mitochondrial	yes	3;4	1.2122e-07	62.765	2	236380000
DLEEDHACIPIKK	13	1	1509.75	P13639;Q8TA90;Q6PK56;B4DPU3	P13639	560	572	EEF2	Elongation factor 2	yes	2	6.0897e-05	116.52	1	0
DLEKPFLLPVEAVYSVPGR	19	1	2128.16	P49411	P49411	253	271	TUFM	Elongation factor Tu, mitochondrial	yes	3	0.0056505	43.598	1	542770000
DLHDANTDLIGR	12	0	1338.65	B4E106;B4DKS0;A0A024R0H1;P53985;Q5T8R3;Q5T8R5;B2R6A5	B4E106	205	216	SLC16A1	Monocarboxylate transporter 1	yes	2	1.245e-14	188.87	1	40769000
DLLDLLVEAK	10	0	1127.64	F6S8Q4;A0A0D9SFB3;A0A2R8YF78;A0A2R8YCW1;A0A0D9SG12;A0A2R8YFR4;A0A2U3TZJ9;A0A2R8YFS5;B5BTY4;A0A2R8Y4A4;Q59GX6;A0A2R8Y645;A0A0D9SF53;O00571;A0A2R8YDT5;A0A2R8Y7T2;A0A2R8Y5G6;Q5S4N1;B4DLU5;A0A024R9A4;O15523;A0A0J9YVQ7;B4E132;A0A087WVZ1	F6S8Q4	522	531	DDX3X;DDX3Y	ATP-dependent RNA helicase DDX3X;ATP-dependent RNA helicase DDX3Y	yes	2	0.0016307	107.15	2	57832000
DLLHPSPEEEKRK	13	2	1576.82	P42677	P42677	6	18	RPS27	40S ribosomal protein S27	yes	2;3	8.043e-05	101.39	2	998770000
DLSLDDFK	8	0	951.455	P30048;A4UCS5;Q53HC2	P30048	84	91	PRDX3	Thioredoxin-dependent peroxide reductase, mitochondrial	yes	1	0.0162	98.629	1	71417000
DLYDAGVKR	9	1	1035.53	V9HW65;A0A024R5Z7;P07355;H0YMD0;H0YMU9;H0YN42;H0YNP5;H0YM50;B3KRQ1;H0YN28;H0YL33	V9HW65	197	205	HEL-S-270;ANXA2	Annexin;Annexin A2	yes	2	0.0043541	128.57	1	0
DMALATK	7	0	748.379	E7EVA0;P27816;H7C456;Q05D06;Q6NX68;A0A024R2V2;A0A024R2S1;B4DM10	E7EVA0	280	286	MAP4	Microtubule-associated protein;Microtubule-associated protein 4	yes	1	0.014475	89.296	1	15631000
DMGGYSTTTDFIK	13	0	1434.63	A0A087WZN1;O43837;A0A0D9SG66;Q9UIC5	A0A087WZN1	362	374	IDH3B	Isocitrate dehydrogenase [NAD] subunit, mitochondrial;Isocitrate dehydrogenase [NAD] subunit beta, mitochondrial	yes	2	0.0035631	60.434	1	20681000
DMVGIAQTGSGK	12	0	1162.57	A0A1X7SBZ2;A0A1W2PQ51;Q59F66;Q92841;B4DZQ7	A0A1X7SBZ2	210	221	DDX17	Probable ATP-dependent RNA helicase DDX17	yes	2	1.865e-07	163.64	1	57673000
DNHLLGTFDLTGIPPAPR	18	0	1933.01	V9HWB4;P11021	V9HWB4	475	492	HEL-S-89n;HSPA5	78 kDa glucose-regulated protein	yes	2;3	6.3241e-11	106.36	2	106480000
DNIQGITKPAIR	12	1	1324.75	Q0VAS5;B2R4R0;P62805	Q0VAS5	25	36	HIST1H4H;HIST1H4A	Histone H4	yes	2	6.7789e-10	176.38	1	33340000
DNMALQR	7	0	846.402	B7Z4V2;V9HW84;P38646;Q8N1C8;B7Z1V7;B7Z4T3;Q2F839;H0YBG6	B7Z4V2	287	293	HEL-S-124m;HSPA9	Stress-70 protein, mitochondrial	yes	2	0.025064	126.16	1	70601000
DNNLLGK	7	0	772.408	V9HW22;Q53GZ6;P11142;E9PKE3;Q96IS6;B3KTV0;Q53HF2;E9PNE6;B4E1Q1;A8K7Q2;E9PS65;Q96BE0;A0A024R6B5;P54652;E9PM13;Q96H53;B3KUS2;A4D110	V9HW22	452	458	HEL-S-72p;HSPA8;HSPA2;LOC401309	Heat shock cognate 71 kDa protein;Heat shock-related 70 kDa protein 2	yes	2	0.03336	86.512	1	68573000
DNNLLGR	7	0	800.414	A8K5I0;A0A0G2JIW1;P0DMV9;P0DMV8;A0A1U9X7W4;B4DNT8;Q59EJ3;B4DWK5;B4DI39;B4E1S9;B4DFN9;B4E388;B4DVU9;V9GZ37;B3KTT5;B4DNX1;B4E1T6;B4DHP5;Q53FA3;B2RCQ9;A0A1U9X7X9;A0A1U9X7X4;A0A1U9X7W7;B4DI54;P34931;B4DXY3;Q53FC7;B3KSM6;B2R6X5;P17066	A8K5I0	452	458	HEL-S-103;HSPA1B;HSPA1A;HSPA1L;HSPA6	Heat shock 70 kDa protein 1B;Heat shock 70 kDa protein 1A;Heat shock 70 kDa protein 1-like;Heat shock 70 kDa protein 6	no	2	0.030402	122.15	1	293470000
DNNMAPYYEALCK	13	0	1530.65	Q15008	Q15008	47	59	PSMD6	26S proteasome non-ATPase regulatory subunit 6	yes	2	0.00016451	70.808	1	0
DPNNLFMVR	9	0	1104.54	Q59EG8;Q13200;B4DM22;Q13041;H7C1H2	Q59EG8	760	768	PSMD2	26S proteasome non-ATPase regulatory subunit 2	yes	2	2.2254e-06	166.17	1	148870000
DPNNLLNDWSQK	12	0	1442.68	A0A0S2Z489;O00232	A0A0S2Z489	420	431	PSMD12	26S proteasome non-ATPase regulatory subunit 12	yes	2	0.00058289	82.261	1	79155000
DPSQQELPR	9	0	1068.52	A0A0U1RQF0;P49327;Q6PJJ3	A0A0U1RQF0	1172	1180	FASN	Fatty acid synthase;[Acyl-carrier-protein] S-acetyltransferase;[Acyl-carrier-protein] S-malonyltransferase;3-oxoacyl-[acyl-carrier-protein] synthase;3-oxoacyl-[acyl-carrier-protein] reductase;3-hydroxyacyl-[acyl-carrier-protein] dehydratase;Enoyl-[acyl-carrier-protein] reductase;Oleoyl-[acyl-carrier-protein] hydrolase	yes	2	0.003587	122.74	1	71740000
DQGGFGDRNEYGSR	14	1	1556.66	A0A087WTP3;Q92945;B4DV73;M0R0I5	A0A087WTP3	307	320	KHSRP	Far upstream element-binding protein 2	yes	3	4.8928e-05	67.964	1	15815000
DREEALHQFR	10	1	1299.63	F6S8Q4;A0A0D9SFB3;A0A2R8YF78;A0A2R8YCW1;A0A0D9SG12;A0A2R8YFR4;A0A2U3TZJ9;A0A2R8YFS5;B5BTY4;A0A2R8Y4A4;Q59GX6;A0A2R8Y645;A0A0D9SF53;O00571;A0A2R8YDT5;A0A2R8Y7T2;A0A2R8Y5G6;Q5S4N1;A0A2R8YDH3;A0A024R9A4;O15523;A0A0J9YVQ7;B4E132;A0A087WVZ1	F6S8Q4	446	455	DDX3X;DDX3Y	ATP-dependent RNA helicase DDX3X;ATP-dependent RNA helicase DDX3Y	yes	2;3	2.024e-05	185.6	2	1769100000
DRPFFPGLVK	10	1	1174.65	Q6FHN3;J3KPD9;Q32Q12;P22392;F6XY72;O60361	Q6FHN3	57	66	NME2;NME1-NME2;NME2P1	Nucleoside diphosphate kinase;Nucleoside diphosphate kinase B;Putative nucleoside diphosphate kinase	yes	2	0.0036752	69.812	1	36022000
DSANLESLAK	10	0	1046.52	Q6P9C2;B2RAL9;Q99956;Q8N4A4	Q6P9C2	218	227	DUSP9	Dual specificity protein phosphatase;Dual specificity protein phosphatase 9	yes	2	0.001671	105.4	1	37788000
DSLLGDKGQTAR	12	1	1259.65	B2RBA6;A0A0S2Z4A5;P33993;Q9H4N9;B3KUD7;B4DDF5;C6EMX8	B2RBA6	642	653	MCM7	DNA helicase;DNA replication licensing factor MCM7	yes	2	0.0091779	68.893	1	17259000
DSYLILETLPTEYDSR	16	0	1913.93	R4GNH3;A0A140VK42;P17980;E9PM69;A8K781;E9PKD5;E9PMD8;E9PN50;E9PLG2	R4GNH3	140	155	PSMC3	26S protease regulatory subunit 6A	yes	2	4.3855e-07	85.288	1	66330000
DTTVGTLSQR	10	0	1076.55	P51665;B2RD27;B4DXI8	P51665	181	190	PSMD7	26S proteasome non-ATPase regulatory subunit 7	yes	2	0.0021101	129.72	1	88161000
DVACGANHTLVLDSQKR	17	1	1825.91	A5PLK7;A0A024RAC5;Q9P258	A5PLK7	269	285	RCC2	Protein RCC2	yes	3	1.1053e-05	65.716	1	0
DVNAAIATIK	10	0	1014.57	B3KT06;B3KPS3;P68363;A8JZY9;B4DDU2;Q53GA7;F5H5D3;Q9BQE3;A0A1W2PQM2;Q8N532	B3KT06	292	301	TUBA1B;TUBA1C	Tubulin alpha-1B chain;Tubulin alpha-1C chain	no	1;2	1.2335e-07	144.28	2	83999000
DWLFAPHYR	9	0	1203.58	Q15008;B3KT66	Q15008	285	293	PSMD6	26S proteasome non-ATPase regulatory subunit 6	yes	2	0.00047558	146.94	1	32376000
DYGNSPLHR	9	0	1057.49	P26599;A6NLN1;A0A0U1RRM4;A0A0D9SF20;A0A087WUW5;K7ELW5	P26599	429	437	PTBP1	Polypyrimidine tract-binding protein 1	yes	2	0.0016383	137.18	1	586510000
EAAAAAAAAVAAAAAAAAAAEPYPVSGAK	29	0	2453.26	Q6P6C2	Q6P6C2	29	57	ALKBH5	RNA demethylase ALKBH5	yes	3	9.9903e-07	67.285	1	0
EAGGGGVGGPGAK	13	0	1012.49	Q8NC51;Q63HR1;Q5VU21;D3DQ70;D3DQ69	Q8NC51	40	52	SERBP1;DKFZp686P17171	Plasminogen activator inhibitor 1 RNA-binding protein	yes	2	0.0003886	72.928	1	54913000
EAIEGTYIDKK	11	1	1265.65	M0QZC5;P62280	M0QZC5	49	59	RPS11	40S ribosomal protein S11	yes	2	0.003078	82.287	1	96847000
EAINLLEPMTNDPVNYVR	18	0	2087.04	Q99460;B2R6D0;A0A087WW66;Q05CW6;Q05BX4	Q99460	667	684	PSMD1	26S proteasome non-ATPase regulatory subunit 1	yes	2	3.391e-08	77.062	1	276030000
EALGDAQQSVR	11	0	1172.58	K7ER44;K7EPP7;K7ESP1;K7EIH8;B7Z9W6;Q59EH7;A8K4T2;Q99615;K7EJL5;K7EN19;K7EJV7;K7EJE9;K7EK03;K7ELJ8	K7ER44	24	34	DNAJC7	DnaJ homolog subfamily C member 7	yes	2	0.0014168	80.688	1	29640000
EALLSSAVDHGSDEVK	16	0	1655.8	V9HW96;P78371;F5GWF6;F8VQ14	V9HW96	139	154	HEL-S-100n;CCT2	T-complex protein 1 subunit beta	yes	2;3	0.0017759	77.062	2	73953000
EANMPLPGYK	10	0	1118.54	B4DPW9;Q53GY0;P13797;A0A0A0MSQ0;U3KQI3;B4DPU6	B4DPW9	43	52	PLS3	Plastin-3	yes	2	0.0034582	86.833	1	99242000
EAPADMGAHQGVAVLGIALIAMGEEIGAEMALR	33	0	3290.65	Q59EG8;Q13200;B4DM22	Q59EG8	646	678	PSMD2	26S proteasome non-ATPase regulatory subunit 2	yes	3	0.037412	19.375	1	120910000
EASIDILHSIVK	12	0	1323.74	O00231;B4DTS5;J3QRY4	O00231	21	32	PSMD11	26S proteasome non-ATPase regulatory subunit 11	yes	3	0.01547	41.383	1	41044000
EATTNAPFR	9	0	1005.49	B4E3A8;V9HWH1;P30740	B4E3A8	140	148	HEL57;SERPINB1	Leukocyte elastase inhibitor	yes	2	0.017323	74.127	1	10636000
EAVELPLTHFELYK	14	0	1687.88	A8K2M0;P43686	A8K2M0	179	192	PSMC4	26S protease regulatory subunit 6B	yes	2;3	0.011585	66.056	2	441000000
EAWDLGVCR	9	0	1047.48	P19474	P19474	352	360	TRIM21	E3 ubiquitin-protein ligase TRIM21	yes	2	0.0010463	124.08	1	0
EAYTAVVYHNR	11	0	1321.64	A0A2X0SSK2;Q96N67	A0A2X0SSK2	252	262	DOCK7	Dedicator of cytokinesis protein 7	yes	2	0.00053368	90.601	1	61279000
EDIKITKER	9	2	1130.63	Q6PJ96;Q5T200	Q6PJ96	125	133	ZC3H13	Zinc finger CCCH domain-containing protein 13	yes	2	0.023846	44.447	1	44142000
EDLQLDKPASGVK	13	1	1398.74	X5D2J9;Q499G6;X5D939;X5DNP5;B4DH52;X5DR09;P78347;A0A1W6S962;A8K9W7	X5D2J9	403	415	GTF2I	General transcription factor II-I	yes	2	0.00065618	111.06	1	349410000
EDLYLKPIQR	10	1	1273.7	P13639;Q8TA90;Q6PK56;B4DRE8	P13639	440	449	EEF2	Elongation factor 2	yes	2;3	2.5474e-08	176.29	2	562420000
EDVLTLLLPVMGDSK	15	0	1628.87	Q59EG8;Q13200;B4DM22;Q9NSM5;Q13041	Q59EG8	500	514	PSMD2;DKFZp564A2282	26S proteasome non-ATPase regulatory subunit 2	yes	2	3.3576e-06	78.692	1	48852000
EEKTPLQVAK	10	1	1141.63	B1AJY5;O75832;B1AJY7	O75832	204	213	PSMD10	26S proteasome non-ATPase regulatory subunit 10	no	1;2	0.00069429	93.178	2	2753300000
EETQPPVALKK	11	1	1238.69	Q8NC51;Q63HR1;Q5VU21;D3DQ70;D3DQ69	Q8NC51	93	103	SERBP1;DKFZp686P17171	Plasminogen activator inhibitor 1 RNA-binding protein	yes	3	0.034157	41.109	1	203000000
EFANFTFPR	9	0	1127.54	A0A2R8Y8A7;Q96L92	A0A2R8Y8A7	89	97	SNX27	Sorting nexin-27	yes	2	0.011319	85.212	1	0
EFFNGKEPSR	10	1	1209.58	V9HWB4;P11021	V9HWB4	377	386	HEL-S-89n;HSPA5	78 kDa glucose-regulated protein	yes	2	0.0080823	100.02	1	30114000
EFLHAQEEVKR	11	1	1384.71	A8K2M0;P43686	A8K2M0	71	81	PSMC4	26S protease regulatory subunit 6B	yes	2	1.1193e-06	163.32	1	790810000
EGFDPAIVKDPLFYLDAQK	19	1	2165.1	Q9BTA1;B3KQE8;B3KNH1;A0A024R8D2;Q6P1M0	Q9BTA1	219	237	SLC27A4	Long-chain fatty acid transport protein 4	yes	3	0.0088972	39.203	1	36800000
EGGLGPLNIPLLADVTR	17	0	1733.97	B4DF70;V9HW12;P32119;A6NIW5	B4DF70	93	109	HEL-S-2a;PRDX2	Peroxiredoxin-2	yes	2	0.019138	53.377	1	48913000
EGIPALDNFLDKL	13	1	1443.76	P13639;Q8TA90;B4DPU3	P13639	846	858	EEF2	Elongation factor 2	yes	2	0.001895	67.93	2	288280000
EHLLLAR	7	0	850.502	P49411	P49411	163	169	TUFM	Elongation factor Tu, mitochondrial	yes	2	0.018572	131.65	1	317190000
EIAEAYLGK	9	0	992.518	V9HW22;Q53GZ6;P11142;E9PKE3;Q96IS6;B3KTV0;Q53HF2;E9PN89;E9PQQ4;E9PQK7;E9PK54;E9PLF4;B4DTX2;E9PPY6;E9PI65;A4D111	V9HW22	129	137	HEL-S-72p;HSPA8;LOC401308	Heat shock cognate 71 kDa protein	yes	2	0.019123	72.485	1	78488000
EIAEAYLGYPVTNAVITVPAYFNDSQR	27	0	3000.49	A8K5I0;A0A0G2JIW1;P0DMV9;P0DMV8;A0A1U9X7W4;B4DNT8;Q59EJ3;B4DWK5;B4E1S9;Q9UQC1	A8K5I0	129	155	HEL-S-103;HSPA1B;HSPA1A;HSP70-1	Heat shock 70 kDa protein 1B;Heat shock 70 kDa protein 1A	yes	3	0.031961	22.723	1	47303000
EIFLSQPILLELEAPLK	17	0	1952.12	A0A087WYY5;F8VR82;Q9UPN1;F8VYE8;A0A024RBP2;F8W0W8;P36873;F8WE71;C9J9S3;C9JP48;F5H1L6;E7ETD8;F5H037;B4E163;E9PMD7;B7ZB67;B4DJ75;V9HW04;A0A140VJS9;B3KXM2;P62140;P62136	A0A087WYY5	44	60	PPP1CC;PPP1CB;PPP1CA;HEL-S-80p	Serine/threonine-protein phosphatase;Serine/threonine-protein phosphatase PP1-gamma catalytic subunit;Serine/threonine-protein phosphatase PP1-beta catalytic subunit;Serine/threonine-protein phosphatase PP1-alpha catalytic subunit	yes	2	0.00035304	62.408	1	56368000
EIKEVIELPVKHPELFEALGIAQPK	25	2	2826.59	A0A140VJS3;P62195;Q59GS3;J3KRP2;J3QSA9;J3QQM1;J3QLH6;J3QRW1;J3QSE0;J3QRR3	A0A140VJS3	160	184	PSMC5	26S protease regulatory subunit 8	yes	3;5	0.00020806	50.271	2	352540000
EIQMLAR	7	0	859.459	F6S8Q4;A0A0D9SFB3;A0A2R8YF78;A0A2R8YCW1;A0A0D9SG12;A0A2R8YFR4;A0A2U3TZJ9;A0A2R8YFS5;B5BTY4;A0A2R8Y4A4;Q59GX6;A0A2R8Y645;A0A0D9SF53;O00571;A0A2R8YDT5;A0A2R8Y7T2;A0A2R8Y5G6;Q5S4N1;A0A2R8YDH3;B4DLU5;A0A024R9A4;O15523;B4E132;B4E010	F6S8Q4	355	361	DDX3X;DDX3Y	ATP-dependent RNA helicase DDX3X;ATP-dependent RNA helicase DDX3Y	yes	2	0.030778	121.87	1	31777000
EITALAPSTMK	11	0	1160.61	Q8WVW5;Q53GK6;Q53G99;Q53G76;Q1KLZ0;P63261;P60709;B4DVQ0;B4DW52;B4E335;B4E3A4;B3KWQ3;Q6PJ43;B7ZAP6;Q96DE1;Q96FU6;F1BXA6;A4UCT3;A5GZ75;B3KUD3;Q9UE89;A0A2R8YFE2;B3KPP5;B7Z6P1;A8K3K1;P68133;P68032;Q7Z7J6;A6NL76;D2JYH4;P63267;P62736;Q13707;B4DUI8	Q8WVW5	304	314	PS1TP5BP1;ACTG1;ACTB;ACTA1;ACTC1;ACTA2;ACTG2	Actin, cytoplasmic 2;Actin, cytoplasmic 2, N-terminally processed;Actin, cytoplasmic 1;Actin, cytoplasmic 1, N-terminally processed;Actin, alpha skeletal muscle;Actin, alpha cardiac muscle 1;Actin, gamma-enteric smooth muscle;Actin, aortic smooth muscle	no	2	0.00089915	70.256	1	60302000
EIYENMAPGENKR	13	1	1549.72	Q59EG8;Q13200;B4DM22;Q9NSM5;H7C2Q3;C9JPC0	Q59EG8	113	125	PSMD2;DKFZp564A2282	26S proteasome non-ATPase regulatory subunit 2	yes	2;3	3.0144e-05	117.71	2	333700000
EKAPSIIFIDELDAIGTK	18	1	1959.06	R4GNH3;A0A140VK42;P17980;E9PM69;A8K781;E9PKD5;E9PMD8;E9PN50	R4GNH3	261	278	PSMC3	26S protease regulatory subunit 6A	yes	2	0.0049275	72.175	1	65484000
EKFENLGIQPPK	12	1	1398.75	R4GNH3;A0A140VK42;P17980;E9PM69;A8K781;E9PKD5;E9PMD8;E9PN50	R4GNH3	194	205	PSMC3	26S protease regulatory subunit 6A	yes	2;3	0.0020282	88.496	2	100840000
EKLEMEMEAAR	11	1	1335.62	A8K525;A0A0S2Z4Z9;Q15233;H7C367;C9JYS8	A8K525	294	304	NONO	Non-POU domain-containing octamer-binding protein	yes	2;3	0.0022819	107.21	2	20566000
EKPYFPIPEEYTFIQNVPLEDR	22	1	2723.35	Q7Z4Q5;A0A1W2PQL0;A0A1W2PP34;A0A1W2PPL4;A0A1W2PPH7;Q5RI18;Q96BA7;A0A1W2PP35;A0A1X7SBS1;B3KX72;B4DLR3;A0A1W2PPS1;Q00839;A0A1W2PRZ7;A0A1W2PQ74	Q7Z4Q5	151	172	HNRPU;HNRNPU	Heterogeneous nuclear ribonucleoprotein U	yes	3	0.0049284	38.175	1	57643000
ELAEQTLNNIK	11	0	1271.67	A3RJH1;Q92499;F1T0B3;A0A087X2G1;B4DP70	A3RJH1	297	307	DDX1	ATP-dependent RNA helicase DDX1	yes	2	1.1394e-06	157.2	1	39106000
ELAILLGMLDPAEKDEK	17	1	1883.99	A4UCS6;V9HWC7;P30041	A4UCS6	18	34	HEL-S-128m;PRDX6	Peroxiredoxin-6	yes	2;3	2.0655e-08	85.845	2	79644000
ELAQQVQQVADDYGK	15	0	1690.82	A0A1X7SBZ2;A0A1W2PQ51;Q59F66;Q92841;B4DZQ7	A0A1X7SBZ2	255	269	DDX17	Probable ATP-dependent RNA helicase DDX17	yes	2	0.0028222	57.836	1	62749000
ELDTVTLEDIKEHVK	15	1	1767.93	Q6IBN0;O43242;B3KNN7;Q96N86;B4DV84;B4DEB0;Q8N9M2	Q6IBN0	66	80	PSMD3	26S proteasome non-ATPase regulatory subunit 3	yes	3	5.8772e-07	82.908	1	353010000
ELEEIVQPIISK	12	0	1396.78	V9HWB4;P11021	V9HWB4	622	633	HEL-S-89n;HSPA5	78 kDa glucose-regulated protein	yes	2	0.0022123	68.847	1	101010000
ELFEMAR	7	0	894.427	A0A140VK70;P35998;A0A1W2PQS1;Q75L23	A0A140VK70	259	265	PSMC2	26S protease regulatory subunit 7	yes	2	0.011397	100.07	1	0
ELGGLGMLSMGHVLIPQSDLR	21	0	2222.16	Q6P2Q9;B4DK16;I3L3Z8	Q6P2Q9	1321	1341	PRPF8	Pre-mRNA-processing-splicing factor 8	yes	3	0.000613	49.528	1	46907000
ELGIWEPLAVK	11	0	1253.7	B4DUR8;B3KX11;Q2TU64;Q59H77;P49368	B4DUR8	447	457	CCT3	T-complex protein 1 subunit gamma	yes	2	0.00035983	96.668	1	47565000
ELGLPEELVSR	11	0	1240.67	B4DUT7;Q53F90;A0A140VJK6;P49915	B4DUT7	374	384	GMPS	GMP synthase [glutamine-hydrolyzing]	yes	2	0.00073886	109.66	1	33211000
ELISNASDALDKIR	14	1	1543.82	B4DMA2;B4DGL0;A0A024RD80;P08238;Q6PK50;F8W026;B4DQX3;Q96GW1;A0A1W2PRR1;Q59FC6;Q5CAQ5;V9HWP2;P14625	B4DMA2	42	55	HSP90AB1;HSP90B1;TRA1;HEL-S-125m	Heat shock protein HSP 90-beta;Endoplasmin	yes	3	3.0596e-06	139.78	1	29366000
ELKTDSSPNQAR	12	1	1344.66	P26599;A6NLN1;Q59H49;A0A087WU68;K7ES59	P26599	135	146	PTBP1	Polypyrimidine tract-binding protein 1	yes	2	0.0017973	134.77	1	60872000
ELLKPNASVALHK	13	1	1418.82	A8K2M0;P43686	A8K2M0	122	134	PSMC4	26S protease regulatory subunit 6B	yes	3	0.0019991	55.314	1	1309500000
ELLNPVVEFVSHPSTTCR	18	0	2027.01	P78527	P78527	2453	2470	PRKDC	DNA-dependent protein kinase catalytic subunit	yes	3	0.0016791	49.224	1	0
ELYDKGGEQAIK	12	1	1349.68	P31689	P31689	62	73	DNAJA1	DnaJ homolog subfamily A member 1	yes	2	0.014071	63.426	1	79693000
EMFNYAR	7	0	929.407	A0A087X2I1;P62333;V9HW24;H0YJC0;H0YJS8;H0YJX2	A0A087X2I1	231	237	PSMC6;HEL-S-73	26S protease regulatory subunit 10B	yes	2	0.037447	116.87	1	27051000
EMQEVETNLQEVVFDYLHATAYQNTALGR	29	0	3368.6	Q9UG64;B3KQ85;B4DM90;Q96CP5;B3KM34;A8K1E9;G3V0E4;O75439	Q9UG64	8	36	DKFZp586I1223;PMPCB	Mitochondrial-processing peptidase subunit beta	yes	3	0.041715	15.764	1	31404000
EMQPTHPIR	9	0	1107.55	V9HWD6;B5BU24;P31946;Q2F831;D0PNI1;E7EX29;P63104;B7Z2E6;H0YB80;B0AZS6;P27348;B4DY04;Q53S41;B4DMT8	P27348	159	167	HEL-S-1;YWHAB;YWHAZ;YWHAQ	14-3-3 protein beta/alpha;14-3-3 protein beta/alpha, N-terminally processed;14-3-3 protein zeta/delta;14-3-3 protein theta	no	2	0.0063707	98.523	1	272900000
EMTLDEWK	8	0	1050.47	Q8NC51;Q63HR1;Q5VU21;D3DQ70;D3DQ69	Q8NC51	287	294	SERBP1;DKFZp686P17171	Plasminogen activator inhibitor 1 RNA-binding protein	yes	2	0.020685	85.265	1	45794000
ENAPAIIFIDEIDAIATKR	19	1	2099.13	A8K2M0;P43686	A8K2M0	256	274	PSMC4	26S protease regulatory subunit 6B	yes	3	2.3377e-10	89.468	2	91542000
ENLISALEEAKK	12	1	1343.73	Q15374;Q3B7A7;Q59HH3;P22102	Q15374	394	405	GART	Trifunctional purine biosynthetic protein adenosine-3;Phosphoribosylamine--glycine ligase;Phosphoribosylformylglycinamidine cyclo-ligase;Phosphoribosylglycinamide formyltransferase	yes	2	0.01502	60.641	1	31209000
ENVIRPILK	9	1	1080.67	A0A2U3TZY2;A0A140VK11;H0YGM0;Q9H078;Q7Z777;A0A2R8Y602	A0A2U3TZY2	527	535	CLPB	Caseinolytic peptidase B protein homolog	no	2	0.0057238	138.54	1	48666000
EPPAASWAVQPHYQLPTAFR	20	0	2265.13	Q8IYS1	Q8IYS1	69	88	PM20D2	Peptidase M20 domain-containing protein 2	yes	3	0.0038236	47.047	1	45852000
EPQLAFHQR	9	0	1124.57	Q6IBN0;O43242;B3KNN7;Q96N86;B4DV84;B4DEB0;B4DPM7;Q8N9M2;O95325	Q6IBN0	471	479	PSMD3	26S proteasome non-ATPase regulatory subunit 3	yes	2	0.011735	81.297	1	320380000
EQGIHSLEVLITR	13	0	1493.82	A0A2R8Y602	A0A2R8Y602	37	49			no	2	0.00022924	63.408	2	0
EQGVLSFWR	9	0	1120.57	Q6NVC0;P05141;Q6I9V5;P12236;Q59EI9	Q6NVC0	89	97	SLC25A5;SLC25A6	ADP/ATP translocase 2;ADP/ATP translocase 2, N-terminally processed;ADP/ATP translocase 3;ADP/ATP translocase 3, N-terminally processed	no	2	0.0033541	127.56	1	1210600000
EQHQHSDLDSNQTHSSGTVTSSSSTANIDDLKK	33	1	3553.62	Q8IYN5;Q14008	Q8IYN5	911	943	CKAP5	Cytoskeleton-associated protein 5	yes	5	0.015049	38.57	1	58281000
EQSILELGSLLAK	13	0	1399.79	O00231;B4DTS5;J3QRY4	O00231	47	59	PSMD11	26S proteasome non-ATPase regulatory subunit 11	yes	2	0.0093113	73.327	1	406850000
EQVANSAFVER	11	0	1248.61	B4DMA2;B4DGL0;A0A024RD80;P08238;Q9H6X9;A8K3W9;Q58FF7	B4DMA2	454	464	HSP90AB1;HSP90AB3P	Heat shock protein HSP 90-beta;Putative heat shock protein HSP 90-beta-3	yes	2	0.00099206	164.46	1	318520000
EQVPGFTPR	9	0	1029.52	A0A024R652;F5H2F4;B7Z809;P11586	A0A024R652	29	37	MTHFD1	C-1-tetrahydrofolate synthase, cytoplasmic;Methylenetetrahydrofolate dehydrogenase;Methenyltetrahydrofolate cyclohydrolase;Formyltetrahydrofolate synthetase;C-1-tetrahydrofolate synthase, cytoplasmic, N-terminally processed	yes	2	0.0026219	132.08	1	34924000
ERVEAVNMAEGIIHDTETK	19	1	2141.04	B7Z4V2;V9HW84;P38646;Q8N1C8;B7Z4T3;A1XP52	B7Z4V2	563	581	HEL-S-124m;HSPA9	Stress-70 protein, mitochondrial	yes	2;3	1.4407e-20	177.41	2	369940000
ESDTGLAPPALWDLAADK	18	0	1868.92	A0A140VK70;P35998;A0A1W2PQS1;Q75L23;C9JLS9;B7Z571	A0A140VK70	67	84	PSMC2	26S protease regulatory subunit 7	yes	2	3.3489e-08	77.22	1	97479000
ESILADK	7	0	774.412	B1AJY5;B1AJY6;O75832;B1AJY7	O75832	24	30	PSMD10	26S proteasome non-ATPase regulatory subunit 10	no	1	0.018418	83.753	1	43296000
ESILADKSLATR	12	1	1302.71	B1AJY5;B1AJY6;O75832;B1AJY7	O75832	24	35	PSMD10	26S proteasome non-ATPase regulatory subunit 10	no	2;3	4.6905e-33	224.02	3	228200000
ESKEEETSIDVAGKPNEVTK	20	2	2189.07	B4E106;B4DKS0;A0A024R0H1;P53985	B4E106	440	459	SLC16A1	Monocarboxylate transporter 1	yes	3	0.041889	31.488	1	64104000
ESTLHLVLR	9	0	1066.61	J3QS39;J3QTR3;F5H6Q2;Q3MIH3;F5GYU3;F5H2Z3;A0A248RGE3;F5H265;Q5UGI3;B4DV12;F5H388;Q5RKT7;B2RDW1;F5H747;F5GXK7;J3QKN0;Q5U5U6;Q5PY61;Q9UFQ0;Q96C32;Q96MH4;L8B4I8;L8B196;Q96H31;L8B4R0;A8K674;L8B4Z6;L8B4M0;L8B4J3;Q66K58;Q59EM9;P62987;P62979;P0CG47;P0CG48;M0R1M6;M0R2S1;A0A2R8Y422;Q8WYN9	J3QS39	64	72	UBB;RPS27A;UBC;UBA52;HEL112;DKFZp434K0435;UbC	Ubiquitin-60S ribosomal protein L40;Ubiquitin;60S ribosomal protein L40;Ubiquitin-40S ribosomal protein S27a;Ubiquitin;40S ribosomal protein S27a;Polyubiquitin-B;Ubiquitin;Polyubiquitin-C;Ubiquitin	yes	2	0.014173	77.282	1	59481000
ETIEDVEEMLNNLPGVTSVHSR	22	0	2468.19	A0A024R201;J3KNQ3;Q53GN6;Q9Y6E3;Q9UNM6;B2RBM7;A0A087WUL9;B4DJ66;E9PL38;H0YD73	A0A024R201	133	154	PSMD13	26S proteasome non-ATPase regulatory subunit 13	yes	2;3	3.7131e-14	136.17	2	572860000
ETSMVHELNR	10	0	1214.57	B3KNG2;B3KME8;B4DM08;B3KNF6;B4DR61;P61619	B3KNG2	39	48	SEC61A1	Protein transport protein Sec61 subunit alpha isoform 1	yes	2	0.0037444	85.67	1	48902000
EVADEVTRPR	10	1	1170.6	B1AHB0;P33992;Q53FG5;A8K521;B1AHA9	B1AHB0	105	114	MCM5	DNA helicase;DNA replication licensing factor MCM5	yes	2	0.0092092	127.56	1	21357000
EVADEVTRPRPSGEEVLQDIQVMLK	25	2	2837.46	B1AHB0;P33992;Q53FG5;A8K521;B1AHA9	B1AHB0	105	129	MCM5	DNA helicase;DNA replication licensing factor MCM5	yes	3	0.00057727	50.426	1	84331000
EVDEQMLNVQNK	12	0	1445.68	B7ZAF0;Q5JP53;Q5SU16;P07437;Q5ST81;Q6LC01;B4DY90;B7ZAK1;Q9BUU9;B4E052;B4DQN9;B2R6L0;Q96B85;B4DXZ5;B4DMU8;B4DMJ5;Q1KSF8;Q6P602;Q8IZ29;Q8IWP6;P68371;Q8N6N5;B3KML9;Q96HX0;A4UCT2;Q9BVA1;Q13885;A0A024QZU2;O43209;B7Z4N1;Q9UGA2	B7ZAF0	296	307	TUBB;XTP3TPATP1;TUBB2C;TUBB4B;TUBB2B;TUBB2A;DKFZp566F223	Tubulin beta chain;Tubulin beta-4B chain;Tubulin beta-2B chain;Tubulin beta-2A chain	no	2	0.00056069	82.75	1	473790000
EVDPLVYNMSHEDPGNVSYSEIGGLSEQIR	30	0	3333.55	A0A087X2I1;P62333;V9HW24;H0YJC0;H0YJS8;B4DR91	A0A087X2I1	128	157	PSMC6;HEL-S-73	26S protease regulatory subunit 10B	yes	3	0.00022315	48.422	1	133100000
EVIELPLTNPELFQR	15	0	1796.97	A0A087X2I1;P62333;V9HW24;H0YJC0;H0YJS8;B4DR91	A0A087X2I1	161	175	PSMC6;HEL-S-73	26S protease regulatory subunit 10B	yes	2	7.8353e-08	147.37	1	251530000
EVIELPVKHPELFEALGIAQPK	22	1	2456.37	A0A140VJS3;P62195;Q59GS3;J3KRP2;J3QSA9;J3QQM1;J3QLH6;J3QRW1;J3QSE0;J3QRR3	A0A140VJS3	163	184	PSMC5	26S protease regulatory subunit 8	yes	2;3;4	5.1312e-11	96.464	3	1981500000
EVIPITNSELR	11	0	1269.69	Q6ZMV5	Q6ZMV5	250	260	SMEK3P	Putative SMEK homolog 3	yes	2	0.0020759	75.738	1	23072000
EVLQNLGPK	9	0	996.56	Q6DEN2;A0A140VK07	Q6DEN2	117	125	DPYSL3		yes	2	0.035579	77.674	1	0
EVVETPLLHPER	12	0	1417.76	A0A140VK70;P35998;A0A1W2PQS1;Q75L23	A0A140VK70	189	200	PSMC2	26S protease regulatory subunit 7	yes	2;3	1.1847e-05	135.55	2	102640000
EWHGCR	6	0	786.323	A3RJH1;Q92499;F1T0B3;A0A087X2G1;B4DP70	A3RJH1	118	123	DDX1	ATP-dependent RNA helicase DDX1	yes	2	0.026035	70.49	1	0
EYFSWEGAFQHVGK	14	0	1683.77	Q53YD7;P26641;B4DUP0	Q53YD7	415	428	EEF1G	Elongation factor 1-gamma	yes	3	0.0028022	49.929	1	68954000
FAALMQHQAK	10	0	1143.59	Q9UK59	Q9UK59	231	240	DBR1	Lariat debranching enzyme	yes	2	0.01087	68.787	1	17536000
FAAQNLHQNLIR	12	0	1423.77	Q9H0C8;E9PC05	Q9H0C8	162	173	ILKAP	Integrin-linked kinase-associated serine/threonine phosphatase 2C	yes	3	0.010785	45.077	1	35535000
FACHSASLTVR	11	0	1190.59	A8K525;A0A0S2Z4Z9;Q15233;C9JYS8;C9IZL7	A8K525	143	153	NONO	Non-POU domain-containing octamer-binding protein	yes	2	0.0010052	71.349	1	0
FAEAFEAIPR	10	0	1149.58	Q7Z759;Q53HU0;P50990	Q7Z759	390	399	CCT8	T-complex protein 1 subunit theta	yes	2	0.00028846	146.81	1	16674000
FAEALGSTEAK	11	0	1122.56	X5D2J9;Q499G6;X5D939;X5DNP5;B4DH52;X5DR09;P78347;A0A1W6S962;A8K9W7;B4DRA9	X5D2J9	437	447	GTF2I	General transcription factor II-I	yes	2	0.00054779	90.108	1	200830000
FCEVIPGLNDTAENLLR	17	0	1902.95	A0A140VK73;Q9NPH2;B3KSG0;B7Z3K3;J3KRH4	A0A140VK73	234	250	ISYNA1	Inositol-3-phosphate synthase 1	yes	2	3.3999e-08	87.001	1	0
FDDAVVQSDMK	11	0	1253.56	V9HW22;Q53GZ6;P11142;E9PKE3;Q96IS6;Q53HF2;E9PNE6;E9PN89;E9PQQ4;E9PQK7;E9PK54;E9PLF4;B4DTX2;E9PPY6;E9PN25;A4D111	V9HW22	78	88	HEL-S-72p;HSPA8;LOC401308	Heat shock cognate 71 kDa protein	yes	2	0.00097542	112.71	1	91121000
FDLLFIMLDQMDPEQDREISDHVLR	25	1	3074.48	Q53HJ4;B2R7C5;A0A0S2Z4T1;P25205;Q8NHX6;B4DUQ9;J3KQ69;A0A0S2Z492;B4DS46	Q53HJ4	479	503	MCM3;HCC5	DNA helicase;DNA replication licensing factor MCM3	yes	3	0.012099	33.909	1	45140000
FDLLWLIQDRPDRDNDLR	18	2	2299.17	B2RBA6;A0A0S2Z4A5;P33993;Q9H4N9;B3KUD7;B4DDF5;C6EMX8	B2RBA6	515	532	MCM7	DNA helicase;DNA replication licensing factor MCM7	yes	4	0.038363	22.63	1	50713000
FEAHPNDLYVEGLPENIPFR	20	0	2356.15	X5D2J9;Q499G6;X5D939;X5DNP5;B4DH52;X5DR09;P78347;A0A1W6S962;A8K9W7;B4DRA9	X5D2J9	454	473	GTF2I	General transcription factor II-I	yes	3	1.8747e-06	66.12	1	43691000
FEELCSDLFR	10	0	1257.57	A8K5I0;A0A0G2JIW1;P0DMV9;P0DMV8;A0A1U9X7W4;B4DNT8;Q59EJ3;B4DWK5;B4DI39;B4E1S9;B4DFN9;B4E388;B4DVU9;V9GZ37;B3KTT5;B4DNV4;B4DHP5;Q53FC7;B3KSM6;B2R6X5;P17066;P48741	A8K5I0	302	311	HEL-S-103;HSPA1B;HSPA1A;HSPA6;HSPA7	Heat shock 70 kDa protein 1B;Heat shock 70 kDa protein 1A;Heat shock 70 kDa protein 6;Putative heat shock 70 kDa protein 7	no	2	0.00067262	128.38	1	0
FEELNADLFR	10	0	1252.61	V9HW22;Q53GZ6;P11142;E9PKE3;Q96IS6;B3KTV0;Q53HF2;E9PNE6;E9PN89;B4E1Q1;A8K7Q2;A0A024R6B5;P54652;B3KUS2	V9HW22	302	311	HEL-S-72p;HSPA8;HSPA2	Heat shock cognate 71 kDa protein;Heat shock-related 70 kDa protein 2	yes	2	4.7198e-06	161.37	1	187240000
FENAFLSHVVSQHQALLGTIR	21	0	2366.25	V9HW26;P25705	V9HW26	507	527	HEL-S-123m;ATP5A1	ATP synthase subunit alpha;ATP synthase subunit alpha, mitochondrial	yes	3;4	5.3071e-13	117.37	2	220840000
FFADLLDYIK	10	0	1243.65	Q6LET3;A0A140VJL3;P00492;A0A0H3YEQ7	Q6LET3	74	83	HPRT1	Hypoxanthine-guanine phosphoribosyltransferase	yes	2	0.010231	69.812	1	24529000
FFDDPMLLELAK	12	0	1437.72	Q8IXJ3;B4DZB1;B3KX19;Q6IBM8;A8KAP3;Q15029;K7EP67	Q8IXJ3	830	841	SNRP116;U5-116KD;EFTUD2	116 kDa U5 small nuclear ribonucleoprotein component	yes	2	0.0029376	64.73	1	43818000
FFSDCK	6	0	745.311	E9PCY7;G8JLB6;P31943;D6RIT2;D6RIU0;D6RBM0;E7EQJ0;D6RAM1;D6R9T0;D6RFM3;D6RDU3;D6RJ04;D6RIH9;E7EN40;D6RF17;D6RDL0;P55795;B4DFK9;B4DP00	E9PCY7	30	35	HNRNPH1;HNRNPH2	Heterogeneous nuclear ribonucleoprotein H;Heterogeneous nuclear ribonucleoprotein H, N-terminally processed;Heterogeneous nuclear ribonucleoprotein H2	no	2	0.018601	84.025	1	0
FGDPVVQSDMK	11	0	1221.57	A8K5I0;A0A0G2JIW1;P0DMV9;P0DMV8;A0A1U9X7W4;B4DNT8;Q59EJ3;B4DFN9;B4E388;B4DNX1	A8K5I0	78	88	HEL-S-103;HSPA1B;HSPA1A	Heat shock 70 kDa protein 1B;Heat shock 70 kDa protein 1A	yes	2	0.00051464	91.265	1	504870000
FGEYHKDDPSSFR	13	1	1583.7	F5H365;B4DSQ5;Q15436;B4DF60	F5H365	528	540	SEC23A	Protein transport protein Sec23A	yes	3	0.019416	39.424	1	60235000
FGGSGSQVDSAR	12	0	1166.53	Q59EG8;Q13200;B4DM22;Q9NSM5	Q59EG8	363	374	PSMD2;DKFZp564A2282	26S proteasome non-ATPase regulatory subunit 2	yes	2	2.8442e-07	161.63	1	141410000
FGNPGER	7	0	775.361	A0A1X7SBZ2;A0A1W2PQ51;Q59F66;Q92841;B4DZQ7	A0A1X7SBZ2	110	116	DDX17	Probable ATP-dependent RNA helicase DDX17	yes	2	0.018948	131.3	1	43997000
FGQGGAGPVGGQGPR	15	0	1340.66	Q9BSV4;Q86VG2;P23246	Q9BSV4	594	608	SFPQ	Splicing factor, proline- and glutamine-rich	yes	2	4.8057e-06	107.79	1	204190000
FHWEQDQIAHMK	12	0	1568.72	A0A090N7X1;A0A090N7Y2;Q9UG63	A0A090N7X1	328	339	ABCF2	ATP-binding cassette sub-family F member 2	yes	3	0.0083027	47.288	1	0
FICEQDHQNFLR	12	0	1548.71	A0A024RDQ0;A0A024RDS1;Q92598;B4DY72;B4DF68;A0A0A0MSM0	A0A024RDQ0	612	623	HSPH1	Heat shock protein 105 kDa	yes	2;3	6.2888e-05	94.692	2	0
FICGTQSIHK	10	0	1132.57	C9IZC9;H7BZ75;O75600;A8K228	C9IZC9	130	139	GCAT	2-amino-3-ketobutyrate coenzyme A ligase, mitochondrial	yes	2	0.0042922	63.419	1	0
FIGEGAR	7	0	748.387	A0A140VJS3;P62195;Q59GS3;J3KRP2;J3QSA9;J3QQM1	A0A140VJS3	223	229	PSMC5	26S protease regulatory subunit 8	yes	2	0.038207	113.08	1	357280000
FIGSPPGYVGHEEGGQLTK	19	0	1971.97	A0A2U3TZY2;A0A140VK11;H0YGM0;Q9H078;Q7Z777;A0A2R8Y602	A0A2U3TZY2	408	426	CLPB	Caseinolytic peptidase B protein homolog	no	3	2.3228e-06	68.088	1	62805000
FIHDQTSPNPK	11	0	1282.63	Q6LAP8;D9HTE9;P53007;B4DP62	Q6LAP8	157	167	SLC25A1	Tricarboxylate transport protein, mitochondrial	yes	2	0.00029593	119.75	1	272370000
FITHAPPGEFNEVFNDVR	18	0	2088.01	A8K0T9;A0A024R0E5;P52907	A8K0T9	20	37	CAPZA1	F-actin-capping protein subunit alpha-1	yes	3	0.042555	21.987	1	41940000
FLEEEVYPLLKPYESVMK	18	1	2213.13	A0A1B0GWJ0;A0A1B0GTJ7;X5D8S6;Q71UA4;B4DP46;A0A0A6YY92;P30566;A0A096LNY6;B4DUM2;A8K4X6;V9GY96;A0A096LP76	A0A1B0GWJ0	460	477	ADSL	Adenylosuccinate lyase	yes	3	0.033406	23.1	1	59185000
FLILPDMLK	9	0	1088.63	P62318	P62318	70	78	SNRPD3	Small nuclear ribonucleoprotein Sm D3	yes	2	0.024947	67.169	1	67865000
FLNAENAQK	9	0	1033.52	C9JXG8;D3DX26;B3KUP2;A0A140VK94;C9JGV6;F6WQW2;P43487	C9JXG8	92	100	RANBP1	Ran-specific GTPase-activating protein	yes	2	0.037482	58.782	1	38166000
FLVLDEADGLLSQGYSDFINR	21	0	2371.17	A3RJH1;Q92499;F1T0B3;A0A087X2G1;B4DP70	A3RJH1	366	386	DDX1	ATP-dependent RNA helicase DDX1	yes	2	0.0001265	61.375	1	58615000
FMSVQRPGPYDRPGTAR	17	2	1933.96	B4DKS8;A0A024R7T3;P52597	B4DKS8	124	140	HNRPF;HNRNPF	Heterogeneous nuclear ribonucleoprotein F;Heterogeneous nuclear ribonucleoprotein F, N-terminally processed	yes	3;4	3.0465e-07	121.82	2	595510000
FNQVLDQFGEK	11	0	1323.65	Q6IBN0;O43242;B3KNN7;Q96N86;B4DV84;B4DEB0;B4DPM7;Q8N9M2	Q6IBN0	375	385	PSMD3	26S proteasome non-ATPase regulatory subunit 3	yes	2	0.00045984	93.178	1	83125000
FPGQLNADLR	10	0	1129.59	B4DE77;P04350;B4DJ43;B4E386;K7ESM5;B3KS31;B4DP54;Q3ZCM7;Q9BUF5;M0R2D3;A0A183YE00;A1L196;B7ZAF0;Q5JP53;Q5SU16;P07437;Q5ST81;Q6LC01;B4DY90;B7ZAK1;Q9BUU9;B4E052;B4DQN9;B2R6L0;Q96B85;B4DXZ5;B4DMU8;Q1KSF8;A5D907;A5D906;A1L195;A0A075B736;Q5SQY0;A6NNZ2;Q8IZ29;Q8IWP6;P68371;Q8N6N5;B3KML9;Q96HX0;Q9BVA1;Q13885;A0A024QZU2;O43209;B7Z4N1;Q9UGA2	B7ZAF0	213	222	TUBB4A;TUBB6;TUBB8;TUBB;XTP3TPATP1;TUBB2A;TUBB2B;TUBB2C;TUBB4B;DKFZp566F223	Tubulin beta-4A chain;Tubulin beta-8 chain;Tubulin beta-6 chain;Tubulin beta chain;Tubulin beta-8 chain-like protein LOC260334;Tubulin beta-4B chain;Tubulin beta-2B chain;Tubulin beta-2A chain	no	2	0.00016365	140.35	2	57531000
FPGQLNADLRK	11	1	1257.68	B4DE77;P04350;B4DJ43;B4E386;K7ESM5;B3KS31;B4DP54;Q3ZCM7;Q9BUF5;M0R2D3;A0A183YE00;A1L196;B7ZAF0;Q5JP53;Q5SU16;P07437;Q5ST81;Q6LC01;B4DY90;B7ZAK1;Q9BUU9;B4E052;B4DQN9;B2R6L0;Q96B85;B4DXZ5;B4DMU8;Q1KSF8;A5D907;A5D906;A1L195;A0A075B736;Q5SQY0;A6NNZ2;Q8IZ29;Q8IWP6;P68371;Q8N6N5;B3KML9;Q96HX0;Q9BVA1;Q13885;A0A024QZU2;O43209;B7Z4N1;Q9UGA2	B7ZAF0	213	223	TUBB4A;TUBB6;TUBB8;TUBB;XTP3TPATP1;TUBB2A;TUBB2B;TUBB2C;TUBB4B;DKFZp566F223	Tubulin beta-4A chain;Tubulin beta-8 chain;Tubulin beta-6 chain;Tubulin beta chain;Tubulin beta-8 chain-like protein LOC260334;Tubulin beta-4B chain;Tubulin beta-2B chain;Tubulin beta-2A chain	no	3	0.0007785	76.927	1	38821000
FQFLYDVQVPIVDK	14	0	1709.9	B2RD24;A0A087WVM4;B7ZM99;Q6UB35	B2RD24	610	623	MTHFD1L	Monofunctional C1-tetrahydrofolate synthase, mitochondrial	yes	2	5.4064e-06	79.741	1	36538000
FQTEIQTVNK	10	0	1206.62	H7BZ35;Q53T60;D3DP78;A0A140VJW5;P14868	H7BZ35	35	44	DARS	Aspartate--tRNA ligase, cytoplasmic	yes	2	0.012294	66.504	1	57873000
FRDQDLASCDR	11	1	1324.58	Q9Y383;B3KSL5;A0A0A6YYJ8;B3KRR1;B3KSP8	Q9Y383	340	350	LUC7L2	Putative RNA-binding protein Luc7-like 2	yes	2	1.3365e-19	199.08	1	0
FREALGDAQQSVR	13	1	1475.75	K7ER44;K7EPP7;K7ESP1;K7EIH8;B7Z9W6;Q59EH7;A8K4T2;Q99615;K7EJL5;K7EN19;K7EJV7;K7EJE9;K7EK03;K7ELJ8	K7ER44	22	34	DNAJC7	DnaJ homolog subfamily C member 7	yes	2	0.00060926	126.83	1	81061000
FSDIQIR	7	0	877.466	A0A024R652;F5H2F4;B7Z809;P11586	A0A024R652	489	495	MTHFD1	C-1-tetrahydrofolate synthase, cytoplasmic;Methylenetetrahydrofolate dehydrogenase;Methenyltetrahydrofolate cyclohydrolase;Formyltetrahydrofolate synthetase;C-1-tetrahydrofolate synthase, cytoplasmic, N-terminally processed	yes	2	0.017456	113.85	1	0
FSELPTQMFPEGATPAEITK	20	0	2193.07	A2A2Q9;Q9Y312	A2A2Q9	208	227	AAR2	Protein AAR2 homolog	yes	2	0.0097055	46.746	1	91455000
FSGGFGAR	8	0	797.382	F6S8Q4;A0A0D9SFB3;A0A2R8YF78;A0A2R8YCW1;A0A0D9SG12;A0A2R8YFR4;A0A2U3TZJ9;A0A2R8YFS5;B5BTY4;A0A2R8Y4A4;Q59GX6;A0A2R8Y645;A0A0D9SF53;O00571;A0A2R8YDT5;A0A2R8Y7T2;A0A2R8Y5G6;Q5S4N1;B4DLU5;A0A024R9A4;O15523;A0A0J9YVQ7;B4E132;A0A087WVZ1	F6S8Q4	560	567	DDX3X;DDX3Y	ATP-dependent RNA helicase DDX3X;ATP-dependent RNA helicase DDX3Y	yes	2	0.0052777	128.38	1	204610000
FSGSGSGTAFTLR	13	0	1286.63	A0A125QYY8	A0A125QYY8	67	79			yes	2	3.1813e-37	221.52	1	4972200000
FSVSPVVR	8	0	889.502	P13639;Q8TA90;Q6PK56	P13639	499	506	EEF2	Elongation factor 2	yes	2	0.0095693	120.65	1	277720000
FTLRDEGK	8	1	964.498	H3BR35;Q7KZX8;B2RCT6;A8K2W7;B4DQM6;P15170;Q8IYD1	H3BR35	453	460	GSPT1;GSPT2	Eukaryotic peptide chain release factor GTP-binding subunit ERF3A;Eukaryotic peptide chain release factor GTP-binding subunit ERF3B	yes	2	0.031912	124.08	1	24098000
FVNLGIEPPK	10	0	1112.62	A0A140VK70;P35998;A0A1W2PQS1;Q75L23	A0A140VK70	201	210	PSMC2	26S protease regulatory subunit 7	yes	2	0.0025463	92.439	1	60900000
FVNLGIEPPKGVLLFGPPGTGK	22	1	2236.26	A0A140VK70;P35998;A0A1W2PQS1;Q75L23	A0A140VK70	201	222	PSMC2	26S protease regulatory subunit 7	yes	3	0.00012835	51.834	1	88165000
FVVDVDKNIDINDVTPNCR	19	1	2175.06	A0A140VJS3;P62195;Q59GS3;J3KRP2;J3QSA9;J3QLH6;J3QRW1	A0A140VJS3	95	113	PSMC5	26S protease regulatory subunit 8	yes	2	1.1324e-09	123.64	1	0
FVVQNVSAQK	10	0	1118.61	A0A024RDQ0;A0A024RDS1;Q92598;B4DY72;B4DF68;A0A0A0MSM0;B4DZB4	A0A024RDQ0	462	471	HSPH1	Heat shock protein 105 kDa	yes	2	0.012177	66.692	1	154300000
FYAFGR	6	0	759.37	P13639;Q8TA90;Q6PK56;B4DRE8	P13639	410	415	EEF2	Elongation factor 2	yes	1;2	0.035583	130.16	2	238040000
FYGPEGPYGVFAGR	14	0	1515.71	Q6IB11;O00264	Q6IB11	106	119	PGRMC1	Membrane-associated progesterone receptor component 1	yes	2	6.2855e-06	90.108	1	50495000
GACHGQTGMFPR	12	0	1260.55	Q6ICN0;B3KR50;B0LPF3;P62993	Q6ICN0	196	207	GRB2	Growth factor receptor-bound protein 2	yes	2	0.01264	46.001	1	0
GAEAANVTGPGGVPVQGSK	19	0	1694.86	Q6PKI6;Q7KZ24;H0Y449;P67809	Q6PKI6	119	137	YBX1	Nuclease-sensitive element-binding protein 1	yes	2	1.1936e-05	66.708	1	42548000
GAEILEVLHSLPAVR	15	0	1602.91	Q15008;B3KT66;H7C531	Q15008	243	257	PSMD6	26S proteasome non-ATPase regulatory subunit 6	yes	2;3	8.3456e-09	123.02	2	351220000
GALALAQAVQR	11	0	1096.64	A0A024R652;F5H2F4;B7Z809;P11586	A0A024R652	794	804	MTHFD1	C-1-tetrahydrofolate synthase, cytoplasmic;Methylenetetrahydrofolate dehydrogenase;Methenyltetrahydrofolate cyclohydrolase;Formyltetrahydrofolate synthetase;C-1-tetrahydrofolate synthase, cytoplasmic, N-terminally processed	yes	2	0.0014521	124.08	1	145590000
GALLGCVPR	9	0	884.49	A0A0X1KG79;Q15822	A0A0X1KG79	346	354	CHRNA2	Neuronal acetylcholine receptor subunit alpha-2	yes	2	0.022314	46.663	1	0
GANFLTQILLRPGASDLTGSFR	22	1	2333.25	Q5QPJ9;A0A0S2Z4Y5;Q5QPK2;H0Y368;O60762	Q5QPJ9	162	183	DPM1	Dolichol-phosphate mannosyltransferase subunit 1	yes	3	4.0594e-31	186.3	1	70637000
GANPVEIR	8	0	854.461	A0A024R3X4;P10809;B3GQS7;B7Z4F6;Q53SE2;E7ESH4;B9VPB4;B9VP19;E7EXB4;A0A0S2Z415;B9VP24	A0A024R3X4	134	141	HSPD1	60 kDa heat shock protein, mitochondrial	yes	2	0.0032151	134.66	1	159340000
GAQDVAGGSNPGAHNPSANLAR	22	0	2059.98	O14654	O14654	1177	1198	IRS4	Insulin receptor substrate 4	yes	3	0.0027134	42.618	1	51844000
GAQVNAVNQNGCTPLHYAASK	21	0	2142.03	O75832;B1AJY7	O75832	96	116	PSMD10	26S proteasome non-ATPase regulatory subunit 10	yes	2;3;4	1.0621e-06	65.085	7	2440800000
GATQQILDEAER	12	0	1329.65	V9HW96;P78371;Q9H369;B7Z4R3;F5GWF6;F8VQ14	V9HW96	377	388	HEL-S-100n;CCT2	T-complex protein 1 subunit beta	yes	2	0.00016983	104.22	1	132100000
GAWSNVLR	8	0	901.477	A8K787;A0A0S2Z3H3;P12235;A0A0S2Z3C4;Q6NVC0;P05141;Q6I9V5;P12236;Q59EI9	Q6NVC0	298	305	SLC25A4;SLC25A5;SLC25A6	ADP/ATP translocase 1;ADP/ATP translocase 2;ADP/ATP translocase 2, N-terminally processed;ADP/ATP translocase 3;ADP/ATP translocase 3, N-terminally processed	no	2	0.0055188	127.95	1	112160000
GCHLLVATPGR	11	0	1122.6	F6S8Q4;A0A0D9SFB3;A0A2R8YF78;A0A2R8YCW1;A0A0D9SG12;A0A2R8YFR4;A0A2U3TZJ9;A0A2R8YFS5;B5BTY4;A0A2R8Y4A4;Q59GX6;A0A2R8Y645;A0A0D9SF53;O00571;A0A2R8YDT5;A0A2R8Y7T2;A0A2R8Y5G6;Q5S4N1;A0A2R8YDH3;B4DLU5;A0A024R9A4;O15523;B4E010	F6S8Q4	283	293	DDX3X;DDX3Y	ATP-dependent RNA helicase DDX3X;ATP-dependent RNA helicase DDX3Y	yes	2;3	0.00023222	85.731	2	0
GCLLYGPPGTGK	12	0	1161.59	A0A087X2I1;P62333;V9HW24;H0YJC0;H0YJS8;B4DR91	A0A087X2I1	183	194	PSMC6;HEL-S-73	26S protease regulatory subunit 10B	yes	1;2	0.00024473	76.943	2	0
GCTATLGNFAK	11	0	1081.52	E9PQD7;Q6IPX5;Q3KQT6;P15880;H0YEN5;Q8J014;Q8N5L9;Q9BSW5;O60249;Q8NI62	E9PQD7	170	180	RPS2;rps2;OK/KNS-cl.6	40S ribosomal protein S2	yes	2	1.3392e-06	108.74	1	0
GDAAVRDELMAAVR	14	1	1472.74	Q15008;C9J7B7	Q15008	33	46	PSMD6	26S proteasome non-ATPase regulatory subunit 6	yes	2	2.5403e-08	160.15	1	63954000
GDAGQPGEK	9	0	857.388	P02461	P02461	924	932	COL3A1	Collagen alpha-1(III) chain	yes	1	0.027018	49.715	1	79220000
GDATVSYEDPPTAK	14	0	1449.66	H7BY36;A0A0D9SFL3;B0QYK0;C9JGE3;Q01844	H7BY36	67	80	EWSR1	RNA-binding protein EWS	yes	2	0.024619	47.559	1	128940000
GDGPICLVLAPTR	13	0	1310.7	A0A1X7SBZ2;A0A1W2PQ51;Q59F66;Q92841;B4DZQ7;J3KRZ1;B4DN41;J3KTA4;B5BUE6;P17844;Q7Z2V5;Q59E92;B4DNG2;J3QRQ7	A0A1X7SBZ2	242	254	DDX17;DDX5;DKFZp686J01190	Probable ATP-dependent RNA helicase DDX17;Probable ATP-dependent RNA helicase DDX5	no	2	0.00020613	69.01	1	0
GDHAWSFLK	9	0	1059.51	A8K787;A0A0S2Z3H3;P12235;A0A0S2Z359;V9GYG0;A0A0S2Z3C4	A8K787	2	10	SLC25A4	ADP/ATP translocase 1	yes	2	0.016298	74.415	1	0
GDLENAFLNLVQCIQNKPLYFADR	24	1	2780.4	V9HW65;A0A024R5Z7;P07355;H0YM50;B3KRQ1	V9HW65	250	273	HEL-S-270;ANXA2	Annexin;Annexin A2	yes	3	1.8803e-10	78.976	1	0
GDLNDCFIPCTPK	13	0	1421.63	A0A024R652;F5H2F4;B7Z809;P11586	A0A024R652	138	150	MTHFD1	C-1-tetrahydrofolate synthase, cytoplasmic;Methylenetetrahydrofolate dehydrogenase;Methenyltetrahydrofolate cyclohydrolase;Formyltetrahydrofolate synthetase;C-1-tetrahydrofolate synthase, cytoplasmic, N-terminally processed	yes	2	0.0035562	51.762	1	0
GDPYPQEVSATVQK	14	0	1517.74	B4DSA4;Q7KZA3;Q53FU1;Q5TZY0;P22830;K7ELX4;K7EJX5	B4DSA4	131	144	DKFZp686P18130;FECH	Ferrochelatase;Ferrochelatase, mitochondrial	yes	2	0.036484	45.257	1	42750000
GEAIEAILAALEVVSEPFR	19	0	2013.08	Q59EG8;Q13200;B4DM22;Q9NSM5;Q13041;H7C1H2	Q59EG8	575	593	PSMD2;DKFZp564A2282	26S proteasome non-ATPase regulatory subunit 2	yes	2;3	3.1072e-20	178.67	2	1060800000
GEELGGGQDPVQLLSGFPR	19	0	1954.97	E9PRQ7;A0A024R598;Q04323;B4E0P8;A0A087WTZ5;E9PJ81;A0A024R539	E9PRQ7	244	262	UBXN1;LOC51035	UBX domain-containing protein 1	yes	2	1.6908e-08	80.522	1	36774000
GEGMPQYR	8	0	936.412	A0A024R6S1;O60884	A0A024R6S1	314	321	DNAJA2	DnaJ homolog subfamily A member 2	yes	2	0.016021	89.673	1	0
GELASYDMR	9	0	1040.46	A0A087WZN1;O43837;A0A087X2E5;L0R875;B4DU38;Q99855	A0A087WZN1	123	131	IDH3B	Isocitrate dehydrogenase [NAD] subunit, mitochondrial;Isocitrate dehydrogenase [NAD] subunit beta, mitochondrial	yes	1;2	0.0038776	116.73	2	78427000
GETVNDCHAEIISR	14	0	1542.71	A0A024DAK3;Q59EC0;P55265;D3DV75;B7Z8Y3;H0YCK3	A0A024DAK3	903	916	ADAR	Double-stranded RNA-specific adenosine deaminase	yes	2;3	0.00011029	69.672	2	0
GETVPLDVLQIK	12	0	1310.74	E9PG39;B4DR72;E9PC15;B4E2Z8;A4D1U5;Q53H12	E9PG39	182	193	AGK;FLJ10842	Acylglycerol kinase, mitochondrial	yes	2	0.0015436	72.643	1	43752000
GFFNIYHPLDPVAYR	15	0	1807.9	B3KN10;B4DWG1;B3KM47;Q9Y6Y8	B3KN10	192	206	SEC23IP	SEC23-interacting protein	yes	3	0.025334	40.477	1	0
GFLKEEDLTEK	11	1	1307.66	P0DN79;P35520;B7Z2D6;B7Z6W5;Q9NTF0;Q96EH7;H7C2H4	P0DN79	395	405	CBS;DKFZp727E011	Cystathionine beta-synthase	yes	2	0.0030765	109.66	1	155880000
GFYDKDSSGWSSSK	14	1	1549.67	F6S8Q4;A0A0D9SFB3;A0A2R8YF78;A0A2R8YCW1;A0A0D9SG12;A0A2R8YFR4;A0A2U3TZJ9;A0A2R8YFS5;B5BTY4;A0A2R8Y4A4;Q59GX6;A0A2R8Y645;A0A0D9SF53;O00571;A0A2R8YDH3;B4DLU5;B4E3C4;A0A2R8YF89;A0A087WX09;B4DLA0;A0A2R8YCU0;A0A2R8Y650	F6S8Q4	51	64	DDX3X	ATP-dependent RNA helicase DDX3X	yes	2	0.041984	35.664	1	146200000
GGDLMAYDRR	10	1	1152.53	B4DUQ1;A0A024R228;P61978;B4DFF1;Q5EC54;Q5T6W2;B3KU16	B4DUQ1	293	302	HNRPK;HNRNPK	Heterogeneous nuclear ribonucleoprotein K	yes	3	0.0011958	90.15	1	85811000
GGGQIIPTAR	10	0	968.54	P13639;Q8TA90;B4DPU3;Q8IXJ3;B4DZB1;B3KX19;Q6IBM8;A8KAP3;Q15029;K7EP67;K7EJ74	P13639	717	726	EEF2;SNRP116;U5-116KD;EFTUD2	Elongation factor 2;116 kDa U5 small nuclear ribonucleoprotein component	no	2	0.0016616	105.81	1	800100000
GGGSVCPVCR	10	0	933.416	P19474	P19474	46	55	TRIM21	E3 ubiquitin-protein ligase TRIM21	yes	2	0.00013107	141.78	1	0
GGIVGMTLPIAR	12	0	1183.67	A0A0S2Z410;Q99714	A0A0S2Z410	173	184	HSD17B10	3-hydroxyacyl-CoA dehydrogenase type-2	yes	2	0.00019529	94.309	1	193570000
GGLGLILKR	9	1	925.607	B1AJY5;O75832;B1AJY7	O75832	214	222	PSMD10	26S proteasome non-ATPase regulatory subunit 10	no	2	0.0016927	118.01	10	27035000000
GGLGVSSSTDGTMK	14	0	1295.6	A0A024R5N4;F5H0C4;Q9BRP4;F5H103;F5H3I1;F5H5D4	A0A024R5N4	87	100	WDR71;PAAF1	Proteasomal ATPase-associated factor 1	yes	2	0.00011352	115.57	1	176420000
GGPGGPGGPGGPMGR	15	0	1206.56	H7BY36;A0A0D9SFL3;B0QYK0;C9JGE3;Q01844	H7BY36	128	142	EWSR1	RNA-binding protein EWS	yes	2	0.0030394	57.348	1	33433000
GGPLQALTR	9	0	911.519	A0A024RBE7;P42167	A0A024RBE7	240	248	TMPO	Lamina-associated polypeptide 2, isoforms beta/gamma;Thymopoietin;Thymopentin	yes	2	0.0008966	146.54	1	0
GGPNIITLADIVKDPVSR	18	1	1864.04	A0A2R8YEW1;V9GYA2;A0A2R8Y4D6;A0A2R8Y4H0;A0A2R8Y5A0;A0A2R8YF43;A0A2R8YD58;Q2I0Y7;E7EU96;B5BUH5;B2R6D7;Q5U5J2;Q8NEV1;P68400	A0A2R8YEW1	90	107	CSNK2A1;CSNK2A3	Casein kinase II subunit alpha 3;Casein kinase II subunit alpha	yes	3	0.00027681	56.817	1	55350000
GGPPPPNWR	9	0	976.488	Q96FS1;Q68DU0;C9JZR2;O60716;Q7KZJ3;A0A024R4Z0;A0A024R4Y7;E9PKY0	Q96FS1	253	261	CTNND1;DKFZp781O2021	Catenin delta-1	yes	2	0.011668	86.086	1	17536000
GGSGSHNWGTVKDELTESPK	20	1	2084.98	Q8NC51;D3DQ70	Q8NC51	217	236	SERBP1	Plasminogen activator inhibitor 1 RNA-binding protein	yes	2;3;4	5.6168e-11	145	3	158400000
GGVDTAAAPAGGAPPAHAPGPGR	23	0	1950.97	Q14657	Q14657	25	47	LAGE3	EKC/KEOPS complex subunit LAGE3	yes	3	5.6843e-05	54.834	1	48135000
GGYIGSTYFER	11	0	1248.58	A0A024R4T4;P61081	A0A024R4T4	170	180	UBE2M	NEDD8-conjugating enzyme Ubc12	yes	2	3.8177e-05	92.062	1	0
GHAAFTSDPKPTIEVSGK	18	1	1840.93	V9HW90;P00390	V9HW90	172	189	HEL-75;GSR	Glutathione reductase, mitochondrial	yes	2	0.006025	53.967	1	92555000
GHFLLSSK	8	0	887.486	P19474	P19474	367	374	TRIM21	E3 ubiquitin-protein ligase TRIM21	yes	2	0.032794	77.058	1	227070000
GHVDILAPTVQELAALEK	18	0	1903.04	A3RJH1;Q92499;F1T0B3;A0A087X2G1	A3RJH1	703	720	DDX1	ATP-dependent RNA helicase DDX1	yes	2;3	1.4427e-09	89.866	2	124230000
GHVELSEAR	9	0	996.499	Q96H79	Q96H79	28	36	ZC3HAV1L	Zinc finger CCCH-type antiviral protein 1-like	yes	2	0.0064609	95.909	1	418700000
GHVFEESQVAGTPMFVVK	18	0	1960.97	P13639;Q8TA90;B4DPU3	P13639	768	785	EEF2	Elongation factor 2	yes	2;3	7.8794e-10	110.08	2	356330000
GHYTEGAELVDSVLDVVR	18	0	1957.97	B7ZAF0;Q5JP53;Q5SU16;P07437;Q5ST81;Q6LC01;B7ZAK1;B2R6L0;B4DMJ5;A5D907;A5D906;A1L195;Q8IZ29;Q8IWP6;P68371;Q8N6N5;Q9BVA1;Q13885;A0A024QZU2;O43209	B7ZAF0	75	92	TUBB;TUBB2A;TUBB2B;TUBB2C;TUBB4B	Tubulin beta chain;Tubulin beta-4B chain;Tubulin beta-2B chain;Tubulin beta-2A chain	no	2;3	4.7471e-32	162.7	2	1116900000
GHYTEGAELVDSVLDVVRK	19	1	2086.07	B7ZAF0;Q5JP53;Q5SU16;P07437;Q5ST81;Q6LC01;B7ZAK1;B2R6L0;B4DMJ5;A5D907;A5D906;A1L195;Q8IZ29;Q8IWP6;P68371;Q8N6N5;Q9BVA1;Q13885;A0A024QZU2;O43209	B7ZAF0	75	93	TUBB;TUBB2A;TUBB2B;TUBB2C;TUBB4B	Tubulin beta chain;Tubulin beta-4B chain;Tubulin beta-2B chain;Tubulin beta-2A chain	no	2;3;4	6.8262e-13	144.73	3	566460000
GIAFALNTK	9	0	933.528	Q546R4;Q9H2T7	Q546R4	726	734	RANBP17	Ran-binding protein 17	yes	2	0.02514	66.993	1	159070000
GIDPFSLDALSK	12	0	1261.66	B4DN39;A1JUI8;B4DPJ8;Q59ET3;B2R9K8;A0A024RDL1;P40227	B4DN39	154	165	CCT6A	T-complex protein 1 subunit zeta	yes	2	0.00015912	97.456	1	48865000
GIGDCVR	7	0	718.343	Q6LAP8;D9HTE9;P53007	Q6LAP8	73	79	SLC25A1	Tricarboxylate transport protein, mitochondrial	yes	2	0.012081	83.087	1	0
GIGIENIHYLNDGLWHMK	18	0	2109.05	Q9ULC4	Q9ULC4	161	178	MCTS1	Malignant T-cell-amplified sequence 1	yes	3	0.0004188	51.193	1	73061000
GIIDPTK	7	0	742.423	A0A024R3X4;P10809;B3GQS7;B7Z5E7;B7Z4F6;B7Z597	A0A024R3X4	517	523	HSPD1	60 kDa heat shock protein, mitochondrial	yes	2	0.038785	114.54	1	62096000
GILEGELEGIR	11	0	1184.64	C9IZC9;H7BZ75;O75600;F2Z340	C9IZC9	29	39	GCAT	2-amino-3-ketobutyrate coenzyme A ligase, mitochondrial	yes	2	0.00050097	106.6	1	32308000
GITINAAHVEYSTAAR	16	0	1672.85	P49411	P49411	105	120	TUFM	Elongation factor Tu, mitochondrial	yes	2	1.0752e-06	103.88	1	59525000
GIVEFASKPAAR	12	1	1244.69	Q9BSV4;Q86VG2;P23246;Q6PIX2	Q9BSV4	341	352	SFPQ	Splicing factor, proline- and glutamine-rich	yes	2	0.00092122	92.051	1	27513000
GKNQAFIEMNTEEAANTMVNYYTSVTPVLR	30	1	3390.62	P26599;A6NLN1;A0A0U1RRM4;Q59H49;K7EKJ7;K7ES59	P26599	93	122	PTBP1	Polypyrimidine tract-binding protein 1	yes	3	0.0056851	36.092	1	111570000
GLCAIAQAESLR	12	0	1230.64	F2Z2S8;H0YF32;A7E2S3;H0YCJ7;Q9NQS8;Q53G83;P23396	F2Z2S8	95	106	RPS3	40S ribosomal protein S3	yes	2	0.00064303	67.334	1	0
GLDISNVK	8	0	844.465	F6S8Q4;A0A0D9SFB3;A0A2R8YF78;A0A2R8YCW1;A0A0D9SG12;A0A2R8YFR4;A0A2U3TZJ9;A0A2R8YFS5;B5BTY4;A0A2R8Y4A4;Q59GX6;A0A2R8Y645;A0A0D9SF53;O00571;A0A2R8YDT5;A0A2R8Y7T2;A0A2R8Y5G6;Q5S4N1;A0A0J9YVQ7;A0A087WVZ1	F6S8Q4	471	478	DDX3X	ATP-dependent RNA helicase DDX3X	yes	2	0.014474	110.63	1	106150000
GLFIIDDK	8	0	919.501	Q06830;A0A0A0MSI0;B2R4P2;A0A0A0MRQ5;V9HW63;Q13162;H7C3T4	Q06830	129	136	PRDX1;HEL-S-97n;PRDX4	Peroxiredoxin-1;Peroxiredoxin-4	no	2	0.0075183	124.34	1	171860000
GLFIIDGK	8	0	861.496	B4DF70;V9HW12;P32119	B4DF70	128	135	HEL-S-2a;PRDX2	Peroxiredoxin-2	yes	2	0.0015945	105.39	1	0
GLGTDEDSLIEIICSR	16	0	1719.83	V9HW65;A0A024R5Z7;P07355;H0YMD0;H0YMU9;H0YN42;H0YKS4;B4DNH8;A6NMY6;H0YMM1;H0YNP5;H0YM50;B3KRQ1;H0YN28;H0YL33;H0YN52;H0YNA0;H0YLE2	V9HW65	120	135	HEL-S-270;ANXA2;ANXA2P2	Annexin;Annexin A2;Putative annexin A2-like protein	yes	2	3.1384e-07	103.75	1	0
GLLPQLLGVAPEK	13	0	1333.8	Q53GR7;Q9UJS0	Q53GR7	393	405	SLC25A13	Calcium-binding mitochondrial carrier protein Aralar2	yes	2	6.8341e-05	105.17	1	46428000
GLNLLIRK	8	1	925.607	Q9HBQ9;A7E261;O14841	Q9HBQ9	265	272	OPLAH	5-oxoprolinase	yes	2	0.0084688	108.98	2	905790000
GLPWSCSADEVQR	13	0	1446.66	E9PCY7;G8JLB6;P31943;D6RIT2;D6RIU0;D6RBM0;E7EQJ0;D6RAM1;E5RGV0;D6R9T0;D6RFM3;D6RDU3;D6RJ04;D6RIH9;E7EN40;D6RF17;D6RDL0;D6R9D3	E9PCY7	17	29	HNRNPH1	Heterogeneous nuclear ribonucleoprotein H;Heterogeneous nuclear ribonucleoprotein H, N-terminally processed	yes	2	6.2614e-05	117.7	1	0
GLQKEEVVLLTHGDSVDK	18	1	1966.04	B4DUT7;Q53F90;A0A140VJK6;P49915	B4DUT7	91	108	GMPS	GMP synthase [glutamine-hydrolyzing]	yes	3	2.2112e-06	71.637	1	55619000
GLVAVITGGASGLGLATAER	20	0	1812.01	A0A0S2Z410;Q99714;Q5H928;A0A0S2Z434	A0A0S2Z410	10	29	HSD17B10	3-hydroxyacyl-CoA dehydrogenase type-2	yes	2;3	2.9751e-14	117.92	2	49527000
GLVLDHGAR	9	0	936.514	B4DN39;A1JUI8;B4DPJ8;Q59ET3;B2R9K8;A0A024RDL1;P40227	B4DN39	67	75	CCT6A	T-complex protein 1 subunit zeta	yes	2	0.01431	77.058	1	75287000
GLVMVKPGSIKPHQK	15	2	1617.94	P49411	P49411	337	351	TUFM	Elongation factor Tu, mitochondrial	yes	2;3	0.00093497	92.538	2	353230000
GLVQALQTK	9	0	956.565	A0A0U1RQF0;P49327;Q6PJJ3	A0A0U1RQF0	1143	1151	FASN	Fatty acid synthase;[Acyl-carrier-protein] S-acetyltransferase;[Acyl-carrier-protein] S-malonyltransferase;3-oxoacyl-[acyl-carrier-protein] synthase;3-oxoacyl-[acyl-carrier-protein] reductase;3-hydroxyacyl-[acyl-carrier-protein] dehydratase;Enoyl-[acyl-carrier-protein] reductase;Oleoyl-[acyl-carrier-protein] hydrolase	yes	2	0.0043148	113.41	1	87193000
GLWHEEMK	8	0	1028.47	B4DNN4;Q53GZ5;P23921;B4DXD1;E9PL69;B4DXB0;B4DS95;B4E0I8	B4DNN4	619	626	RRM1	Ribonucleoside-diphosphate reductase;Ribonucleoside-diphosphate reductase large subunit	yes	2	0.022917	83.753	1	103100000
GMGGAFVLVLYDELKK	16	1	1738.93	Q6I9V5;P12236;Q59EI9	Q6I9V5	281	296	SLC25A6	ADP/ATP translocase 3;ADP/ATP translocase 3, N-terminally processed	yes	3	3.2248e-05	53.169	2	100110000
GMTTVDDFFQGTK	13	0	1445.65	Q6DEN2;A0A140VK07;Q8IXW6;Q14195	Q6DEN2	196	208	DPYSL3	Dihydropyrimidinase-related protein 3	yes	2	0.0073637	55.401	1	34869000
GMYDGPVFDLTTTPK	15	0	1640.78	Q6DEN2;A0A140VK07;Q8IXW6;Q14195;B4DLZ4;H0YBT4	Q6DEN2	611	625	DPYSL3	Dihydropyrimidinase-related protein 3	yes	2	0.029508	45.915	1	53200000
GNLANVIR	8	0	855.493	A8K787;A0A0S2Z3H3;P12235;A0A0S2Z359;V9GYG0;Q9H0C2;Q59EP7;O75961;Q6NVC0;P05141;Q6I9V5;P12236;Q59EI9	Q6NVC0	98	105	SLC25A4;SLC25A31;SLC25A5;SLC25A6	ADP/ATP translocase 1;ADP/ATP translocase 4;ADP/ATP translocase 4, N-terminally processed;ADP/ATP translocase 2;ADP/ATP translocase 2, N-terminally processed;ADP/ATP translocase 3;ADP/ATP translocase 3, N-terminally processed	no	2	0.0064642	126.24	1	444990000
GPAVGIDLGTTYSCVGVFQHGK	22	0	2205.09	V9HW22;Q53GZ6;P11142;E9PKE3;B3KTV0;Q53HF2;E9PNE6;E9PQQ4;E9PQK7;E9PK54;E9PLF4;B4DTX2;E9PPY6;E9PI65;E9PN25	V9HW22	4	25	HEL-S-72p;HSPA8	Heat shock cognate 71 kDa protein	yes	2;3	1.6172e-10	87.486	2	0
GPILMELQTYR	11	0	1319.69	A5YPB6;A5PHJ9;A0A024RBX9;P29803;P08559	A5YPB6	149	159	PDHA1;PDHA1/LOC79064;PDHA2	Pyruvate dehydrogenase E1 component subunit alpha;Pyruvate dehydrogenase E1 component subunit alpha, testis-specific form, mitochondrial;Pyruvate dehydrogenase E1 component subunit alpha, somatic form, mitochondrial	yes	2	0.00015663	141.48	1	46399000
GPLMMYISK	9	0	1038.52	P13639;Q8TA90;Q6PK56;B4DRE8	P13639	392	400	EEF2	Elongation factor 2	yes	2	0.038115	58.426	1	128560000
GPSSVEDIK	9	0	930.466	A0A0S2Z4G7;A0A0S2Z491;P06748;Q9BTI9;A0A140VJQ2;A4ZU86;Q9NX34;A0A024R3V9	A0A0S2Z4G7	211	219	NPM1;hCG_37498	Nucleophosmin	yes	2	0.01783	73.665	1	48103000
GPVGLEGLLTTK	12	0	1183.68	P54886	P54886	750	761	ALDH18A1	Delta-1-pyrroline-5-carboxylate synthase;Glutamate 5-kinase;Gamma-glutamyl phosphate reductase	yes	2	0.0015436	72.643	1	31648000
GPVKPTGGPGGGGTQTQQQMNQLK	24	1	2365.18	Q8IV96;B2R858;P26196	Q8IV96	23	46	DDX6	Probable ATP-dependent RNA helicase DDX6	yes	3	5.2027e-06	62.611	1	151050000
GPYESGSGHSSGLGHR	16	0	1583.71	Q86YZ3	Q86YZ3	1038	1053	HRNR	Hornerin	yes	2;3	2.5195e-06	117.09	2	117500000
GQTHTLEDFQR	11	0	1330.63	A0A0S2Z410;Q99714;Q5H928;A0A0S2Z434	A0A0S2Z410	106	116	HSD17B10	3-hydroxyacyl-CoA dehydrogenase type-2	yes	2	8.0465e-05	147.75	1	234290000
GQVCVMIHSGSR	12	0	1272.61	Q9Y3I0;B4DNA0	Q9Y3I0	252	263	RTCB	tRNA-splicing ligase RtcB homolog	yes	2	0.00022168	78.655	1	0
GSGEQDWVNRPK	12	1	1371.65	Q7Z5L9	Q7Z5L9	292	303	IRF2BP2	Interferon regulatory factor 2-binding protein 2	yes	2	0.0041389	56.258	1	38542000
GSGPLSPSIQSR	12	0	1184.61	Q59FI2;H0Y6Z7;P10586;H0Y7Z9;Q7Z3X4;B3KWM1	Q59FI2	640	651	PTPRF;DKFZp686B1310	Receptor-type tyrosine-protein phosphatase F;Protein-tyrosine-phosphatase	yes	2	0.00052676	83.499	1	117340000
GSIDEVDKR	9	1	1017.51	A0A024R201;J3KNQ3;Q53GN6;Q9Y6E3;Q9UNM6;B2RBM7;A0A087WUL9;B4DJ66;Q9UNM7	A0A024R201	322	330	PSMD13	26S proteasome non-ATPase regulatory subunit 13	yes	2	0.012987	107.66	1	342500000
GSLESPATDVFGSTEEGEKR	20	1	2094.97	A0A0S2Z489;O00232	A0A0S2Z489	331	350	PSMD12	26S proteasome non-ATPase regulatory subunit 12	yes	2	1.6641e-09	95.651	1	37234000
GSYVSIHSSGFR	12	0	1295.63	B4DX78;O00148;K7EPJ3;K7EQN7;A0A024R7H0;Q5STU3;A0A024RCM3;Q13838;A0A286SD68;A0A286SD67;A0A286SD65;A0A286SD64;A0A286SD63;A0A286SD59;A0A286SD52;K7ENP6;A0A0G2JHN7;K7EL56;K7EIL8;F6U6E2;K7EN69;F6S2B7;F6SXL5;B4DH55;Q7KYK3;B4DF34;F6QYI9;A0A0G2JJL7;F6R6M7;F6S4E6;A0A0A0MT12;F6TRA5;F6WLT2;Q59G92	B4DX78	79	90	DDX39A;DDX39;DDX39B;hCG_2005638;BAT1	ATP-dependent RNA helicase DDX39A;Spliceosome RNA helicase DDX39B	yes	2	0.013407	51.528	1	0
GTAVVNGEFK	10	0	1020.52	P30048;A4UCS5	P30048	74	83	PRDX3	Thioredoxin-dependent peroxide reductase, mitochondrial	yes	2	0.0014693	116.05	1	57732000
GTAYTFFTPGNLK	13	0	1415.71	A0A1X7SBZ2;A0A1W2PQ51;Q59F66;Q92841	A0A1X7SBZ2	516	528	DDX17	Probable ATP-dependent RNA helicase DDX17	yes	2	9.6324e-05	76.943	1	171710000
GTGIVSAPVPK	11	0	1024.59	E9PQD7;Q6IPX5;Q3KQT6;P15880;H0YEN5;E9PMM9;Q8J014;Q9BSW5;I3L404;E9PM36	E9PQD7	143	153	RPS2;rps2	40S ribosomal protein S2	yes	2	0.022228	50.805	1	103100000
GTLTLCPYHSDR	12	0	1361.64	Q59EG8;Q13200;B4DM22;Q13041	Q59EG8	779	790	PSMD2	26S proteasome non-ATPase regulatory subunit 2	yes	3	0.00020956	76.522	1	0
GTTGTQASFLQLFEGDDHKVEQLDK	25	1	2763.34	A0A1B0GWJ0;A0A1B0GTJ7;X5D8S6;Q71UA4;B4DP46;A0A0A6YY92;P30566;A0A096LNY6;A0A096LNY5;B4DUM2;X5DP48;X5D2Z4;A0A1B0GTG9;A0A1B0GWF8;A8K4X6;A0A096LP92;A0A096LPA2	A0A1B0GWJ0	200	224	ADSL	Adenylosuccinate lyase	yes	4	0.042851	12.346	1	93019000
GTVVTGTLER	10	0	1031.56	P49411	P49411	272	281	TUFM	Elongation factor Tu, mitochondrial	yes	2	0.00149	116.37	1	684110000
GVCTEAGMYALR	12	0	1269.58	A0A140VJS3;P62195	A0A140VJS3	361	372	PSMC5	26S protease regulatory subunit 8	yes	2	0.000111	108.98	1	0
GVDEVTIVNILTNR	14	0	1541.84	V9HW65;A0A024R5Z7;P07355;H0YMD0;H0YMU9;H0YN42;H0YKS4;B4DNH8;H0YMM1;H0YKZ7;H0YLV6;H0YMT9;H0YKX9;H0YKL9;H0YMW4;H0YMD9;H0YKV8	V9HW65	50	63	HEL-S-270;ANXA2	Annexin;Annexin A2	yes	2	0.0019846	61.435	1	59972000
GVIQVYDLGQDGQGMSR	17	0	1821.87	E9PF10;A0A024R071;O75694;B4DLT2	E9PF10	298	314	NUP155	Nuclear pore complex protein Nup155	yes	2	4.7251e-08	90.793	1	46573000
GVLLFGPPGTGK	12	0	1141.65	A0A140VK70;P35998;A0A1W2PQS1;Q75L23	A0A140VK70	211	222	PSMC2	26S protease regulatory subunit 7	yes	2	0.00030028	88.496	1	146700000
GVLLYGPPGTGK	12	0	1157.64	A0A140VJS3;P62195;Q59GS3;J3KRP2;J3QSA9;J3QQM1;J3QLH6;J3QRW1;J3QRR3;Q8NB90	A0A140VJS3	185	196	PSMC5;SPATA5	26S protease regulatory subunit 8;Spermatogenesis-associated protein 5	yes	1;2	0.00011123	99.815	3	406880000
GVLMYGPPGTGK	12	0	1175.6	R4GNH3;A0A140VK42;P17980;E9PM69;A8K781;E9PKD5;E9PMD8;E9PN50	R4GNH3	206	217	PSMC3	26S protease regulatory subunit 6A	yes	2	0.00036132	87.149	1	106890000
GVMLAVDAVIAELKK	15	1	1555.9	A0A024R3X4;P10809;B3GQS7;B7Z4F6;B7Z597;Q53SE2;E7ESH4;E7EXB4	A0A024R3X4	143	157	HSPD1	60 kDa heat shock protein, mitochondrial	yes	2;3	0.0005118	75.045	2	370580000
GVPTGFILPIR	11	0	1168.7	A0A024R652;F5H2F4;B7Z809;P11586;V9GYY3	A0A024R652	879	889	MTHFD1	C-1-tetrahydrofolate synthase, cytoplasmic;Methylenetetrahydrofolate dehydrogenase;Methenyltetrahydrofolate cyclohydrolase;Formyltetrahydrofolate synthetase;C-1-tetrahydrofolate synthase, cytoplasmic, N-terminally processed	yes	2	0.0011449	114.89	1	101190000
GVQYLNEIKDSVVAGFQWATK	21	1	2352.21	P13639;Q8TA90;B4DPU3;Q6W6M8	P13639	668	688	EEF2	Elongation factor 2	yes	3	9.8484e-13	100.28	1	273190000
GVVDSEDLPLNISR	14	0	1512.78	B4DMA2;B4DGL0;A0A024RD80;P08238;Q9H6X9;A8K3W9;Q86U12;Q96HX7;O75322;Q2VPJ6;Q8TBA7;K9JA46;P07900	B4DMA2	341	354	HSP90AB1;HSP90AA1;EL52	Heat shock protein HSP 90-beta;Heat shock protein HSP 90-alpha	yes	2	3.0914e-05	82.171	1	104570000
GVVEVTHDLQK	11	0	1223.65	A0A024R5K8;P50454;B4DN87;A8K259;E9PKH2	A0A024R5K8	309	319	SERPINH1	Serpin H1	yes	2	0.00089781	134.77	1	530770000
GVYPDLLATSGDYLR	15	0	1638.83	B4DH46;P61962	B4DH46	82	96	DCAF7	DDB1- and CUL4-associated factor 7	yes	2	7.1486e-07	88.187	1	52035000
GWVLGPNNYYSFASQQQKPEDTTIPSTELAK	31	1	3468.68	R4GMR5;V9HW09;P48556	R4GMR5	244	274	PSMD8;HEL-S-91n	26S proteasome non-ATPase regulatory subunit 8	yes	3	0.0074542	35.376	1	233480000
GYELLFQPEVVR	12	0	1448.77	Q96FS1;Q68DU0;C9JZR2;O60716;Q7KZJ3;A0A024R4Z0;A0A024R4Y7	Q96FS1	546	557	CTNND1;DKFZp781O2021	Catenin delta-1	yes	2	0.00084688	72.325	1	0
GYISPYFINTSK	12	0	1388.7	A0A024R3X4;P10809;B3GQS7;B7Z5E7;B7Z4F6;B7Z597;B7Z532;Q53SE2;E7ESH4;B9VPB4;B9VP19	A0A024R3X4	222	233	HSPD1	60 kDa heat shock protein, mitochondrial	yes	2	0.010771	56.043	1	49726000
GYLPSHYER	9	0	1120.53	Q6P2Q9;B4DK16;I3L1T8;Q53GM6	Q6P2Q9	2250	2258	PRPF8	Pre-mRNA-processing-splicing factor 8	yes	2	0.031827	61.962	1	65714000
GYQTSPDLR	9	0	1035.5	A0A2X0SSK2;Q96N67;B3KRG0;B4DSH0;A0A1B0GWE0	A0A2X0SSK2	1286	1294	DOCK7	Dedicator of cytokinesis protein 7	yes	2	9.855e-06	161.68	1	61530000
GYQVTYVR	8	0	984.503	Q59FI2;H0Y6Z7;P10586;H0Y4H1;H0Y7Z9;Q5W9G3;Q7Z3X4;B3KWM1	Q59FI2	399	406	PTPRF;LAR;DKFZp686B1310	Receptor-type tyrosine-protein phosphatase F;Protein-tyrosine-phosphatase	yes	2	0.0018642	138.85	1	65660000
GYSFTTTAER	10	0	1131.52	Q8WVW5;Q53GK6;Q53G99;Q53G76;Q1KLZ0;P63261;P60709;B4DVQ0;B4DW52;B4E335;B4E3A4;A0A2R8Y793;B3KWQ3;Q6PJ43;B7ZAP6;V9HVZ7;I3L3I0;I3L1U9;I3L4N8;A0A2R8YEA7	Q8WVW5	185	194	PS1TP5BP1;ACTG1;ACTB;HEL-176	Actin, cytoplasmic 2;Actin, cytoplasmic 2, N-terminally processed;Actin, cytoplasmic 1;Actin, cytoplasmic 1, N-terminally processed	yes	2	0.00034854	145.16	1	546190000
HAVVVGR	7	0	736.434	A0A024R652;F5H2F4;B7Z809;P11586	A0A024R652	167	173	MTHFD1	C-1-tetrahydrofolate synthase, cytoplasmic;Methylenetetrahydrofolate dehydrogenase;Methenyltetrahydrofolate cyclohydrolase;Formyltetrahydrofolate synthetase;C-1-tetrahydrofolate synthase, cytoplasmic, N-terminally processed	yes	2	0.019442	130.84	1	72013000
HCSQVDSVR	9	0	1029.47	Q53HG7;Q14247;A0A024R5M3;Q76MU0	Q53HG7	111	119	CTTN;EMS1	Src substrate cortactin	yes	2	0.0059381	71.692	1	0
HDADGQATLLNLLLR	15	0	1648.89	Q6IBN0;O43242;B3KNN7;Q96N86;B4DV84;B4DEB0;B4DPM7;Q8N9M2	Q6IBN0	242	256	PSMD3	26S proteasome non-ATPase regulatory subunit 3	yes	2;3	1.6837e-70	327.1	2	387450000
HDNLLHGTK	9	0	1033.53	Q53HJ4;B2R7C5;A0A0S2Z4T1;P25205;Q8NHX6;B4DUQ9;J3KQ69;A0A0S2Z492;B4DS46;Q7Z6P5	Q53HJ4	548	556	MCM3;HCC5	DNA helicase;DNA replication licensing factor MCM3	yes	2	0.0050445	109.29	1	388300000
HEHQVMLMR	9	0	1179.56	A8K525;A0A0S2Z4Z9;Q15233;H7C367;C9JYS8	A8K525	305	313	NONO	Non-POU domain-containing octamer-binding protein	yes	3	0.00091334	111.74	1	0
HEIAVMLLEGGANPDAK	17	0	1763.89	B1AJY5;B1AJY6;O75832;B1AJY7	O75832	119	135	PSMD10	26S proteasome non-ATPase regulatory subunit 10	no	2;3	3.3298e-34	210.41	39	37419000000
HEIAVMLLEGGANPDAKDHYEATAMHR	27	1	2975.4	B1AJY5;B1AJY6;O75832;B1AJY7	O75832	119	145	PSMD10	26S proteasome non-ATPase regulatory subunit 10	no	2;3;4;5	6.9211e-38	186.55	56	34672000000
HELQANCYEEVKDR	14	1	1732.78	G3V1A4;E9PP50;V9HWI5;E9PK25;P23528	G3V1A4	116	129	CFL1;HEL-S-15	Cofilin-1	yes	2;3	3.7257e-06	135.02	2	0
HFEALANR	8	0	956.483	F5H365;B4DSQ5;Q15436;B4DF60;B4E0Q9	F5H365	301	308	SEC23A	Protein transport protein Sec23A	yes	2	0.015702	88.643	1	97782000
HFLLEEDKPEEPTAHAFVSTLTR	23	1	2666.33	A0A0U1RQF0;P49327;Q6PJJ3	A0A0U1RQF0	1514	1536	FASN	Fatty acid synthase;[Acyl-carrier-protein] S-acetyltransferase;[Acyl-carrier-protein] S-malonyltransferase;3-oxoacyl-[acyl-carrier-protein] synthase;3-oxoacyl-[acyl-carrier-protein] reductase;3-hydroxyacyl-[acyl-carrier-protein] dehydratase;Enoyl-[acyl-carrier-protein] reductase;Oleoyl-[acyl-carrier-protein] hydrolase	yes	3;4	3.442e-07	70.453	2	105170000
HGEVCPAGWKPGSDTIKPDVQK	22	2	2348.16	Q06830;A0A0A0MRQ5	Q06830	169	190	PRDX1	Peroxiredoxin-1	yes	2;3	1.8649e-09	77.776	2	0
HGLYLPTR	8	0	955.524	A0A0U1RQF0;P49327	A0A0U1RQF0	1044	1051	FASN	Fatty acid synthase;[Acyl-carrier-protein] S-acetyltransferase;[Acyl-carrier-protein] S-malonyltransferase;3-oxoacyl-[acyl-carrier-protein] synthase;3-oxoacyl-[acyl-carrier-protein] reductase;3-hydroxyacyl-[acyl-carrier-protein] dehydratase;Enoyl-[acyl-carrier-protein] reductase;Oleoyl-[acyl-carrier-protein] hydrolase	yes	2	0.014363	89.55	1	262990000
HGWQIER	7	0	924.457	O15541	O15541	228	234	RNF113A	RING finger protein 113A	yes	2	0.024912	87.284	1	0
HIEWESVLTNTAGCLR	16	0	1827.89	Q96FS1;Q68DU0;C9JZR2;O60716;Q7KZJ3;A0A024R4Z0;A0A024R4Y7	Q96FS1	417	432	CTNND1;DKFZp781O2021	Catenin delta-1	yes	2;3	8.9775e-35	215.51	2	0
HIVAVLPEIDPVLFQGK	17	0	1874.07	H7C286;C9JEV6;Q9UJ70	H7C286	97	113	NAGK	N-acetyl-D-glucosamine kinase	yes	2;3	4.1475e-06	55.213	2	26720000
HLAEHSPYYEAMK	13	0	1574.72	Q8N9Z3;K0A7K7;Q9BV61;Q59EK6;Q53G55;Q53FS6;A0A140VJY2;Q12931;Q5CAQ4;I3L0K7	Q8N9Z3	499	511	TRAP1	Heat shock protein 75 kDa, mitochondrial	yes	3	0.0003516	63.091	1	66726000
HLAGEVAK	8	0	823.455	Q59EG8;Q13200;Q9NSM5	Q59EG8	166	173	PSMD2;DKFZp564A2282	26S proteasome non-ATPase regulatory subunit 2	yes	2	0.017091	104.45	1	765370000
HLAGYEQQDAHEFLIAALDVLHR	23	0	2645.34	Q9UPT9	Q9UPT9	254	276	USP22	Ubiquitin carboxyl-terminal hydrolase 22	yes	4	3.5461e-13	104.18	1	85324000
HLCAVYYNK	9	0	1109.53	B7ZB32;Q9BR63;A8K666;Q9NSD9	B7ZB32	397	405	FARSB	Phenylalanine--tRNA ligase beta subunit	yes	2	0.0031267	83.287	1	0
HLIPAANTGESK	12	0	1236.65	V9HW98;G9K389;G9K388;P62258;B7ZA86	V9HW98	107	118	HEL2;YWHAE/FAM22B fusion;YWHAE/FAM22A fusion;YWHAE	14-3-3 protein epsilon	yes	2	0.015383	51.436	1	41787000
HLKEIQDLQSR	11	1	1365.74	A5D8Z4;D3DUP2;F5GWT4;D3DUP1;Q9H4A3	A5D8Z4	1238	1248	WNK1	Serine/threonine-protein kinase WNK1	yes	2	0.021658	44.349	5	402580000
HLLQAPLDDAQEILQAR	17	0	1930.03	Q5QPE1;B4DS04;B4DRA5;B4DJW8;A0A2R8YFH5;Q15437	Q5QPE1	164	180	SEC23B	Protein transport protein Sec23B	yes	3	1.0316e-07	77.746	1	43663000
HLQLAIR	7	0	849.518	C9J386;H0YFX9;B4E0B3;C9J0D1;A3KPC7;A0A024RAS2;Q08AJ9;B2R5B6;B2R5B3;A4FTV9;A0A024R017;A0A0U1RR32;A0A0U1RRH7;Q99878;Q96KK5;Q71UI9;P0C0S5;Q9BTM1;Q16777;Q93077;Q7L7L0;Q6FI13;P20671;P0C0S8;P04908;Q96QV6;P16104	C9J386	48	54	H2AFV;H2AFJ;HIST1H2AH;HIST1H2AB;HIST1H2AK;HIST1H2AC;HIST1H2AJ;H2AFZ;HIST2H2AC;HIST3H2A;HIST2H2AA3;HIST1H2AD;HIST1H2AG;HIST1H2AA;H2AFX	Histone H2A;Histone H2A type 1-J;Histone H2A type 1-H;Histone H2A.V;Histone H2A.Z;Histone H2A.J;Histone H2A type 2-C;Histone H2A type 1-C;Histone H2A type 3;Histone H2A type 2-A;Histone H2A type 1-D;Histone H2A type 1;Histone H2A type 1-B/E;Histone H2A type 1-A;Histone H2AX	yes	2	0.027824	91.584	1	134510000
HLQLAVR	7	0	835.503	A2RUA4;Q8IUE6	A2RUA4	83	89	HIST2H2AB	Histone H2A;Histone H2A type 2-B	yes	2	0.013882	105.42	1	0
HLSDSINQK	9	0	1040.53	D3DUJ0;Q8TA92;Q9Y4W6	D3DUJ0	497	505	AFG3L2	AFG3-like protein 2	yes	2	0.00072413	114.65	1	0
HLSVNDLPVGR	11	0	1205.65	P30048;Q53HC2	P30048	197	207	PRDX3	Thioredoxin-dependent peroxide reductase, mitochondrial	yes	2	0.001265	131.44	1	200210000
HLTHAQSTLDAK	12	0	1320.68	A0A024QYX0;Q15125	A0A024QYX0	210	221	EBP	3-beta-hydroxysteroid-Delta(8),Delta(7)-isomerase	yes	2	0.00013201	99.815	1	23156000
HLVSPEALDLLDK	13	0	1448.79	H3BSA1;P19784;H3BV19	H3BSA1	172	184	CSNK2A2	Casein kinase II subunit alpha	yes	2	5.5819e-09	102.52	1	0
HMQLYCDR	8	0	1064.45	B1AHB0;P33992;Q53FG5;A8K521;B1AHB1;B4DQ39;B3KVF0;B4DVK5;B1AHB2	B1AHB0	244	251	MCM5	DNA helicase;DNA replication licensing factor MCM5	yes	2	0.002682	121.62	1	0
HNLITEMVALNPDFKPPADYKPPATR	26	2	2934.51	A0A024R588;A0A024R566;B4DJU4;A0A024R5D9;A0A024R572;Q15637	A0A024R588	110	135	SF1	Splicing factor 1	yes	4	3.4999e-11	78.451	1	105460000
HPDYAILAAR	10	0	1125.59	B4DNN4;Q53GZ5;P23921	B4DNN4	41	50	RRM1	Ribonucleoside-diphosphate reductase;Ribonucleoside-diphosphate reductase large subunit	yes	2	0.004033	84.498	1	48748000
HPELFEALGIAQPK	14	0	1548.83	A0A140VJS3;P62195;Q59GS3;J3KRP2;J3QSA9;J3QQM1;J3QLH6;J3QRW1;J3QSE0;J3QRR3	A0A140VJS3	171	184	PSMC5	26S protease regulatory subunit 8	yes	2	4.6021e-05	77.662	1	58951000
HPENYDLATLK	11	0	1299.65	X5D2J9;Q499G6;X5D939;X5DNP5;B4DH52;X5DR09;P78347;A0A1W6S962;A8K9W7;X5D7Q9;A0A0A0VEB4	X5D2J9	161	171	GTF2I;GTF2I-RARA	General transcription factor II-I	yes	2	0.00029265	99.013	1	269050000
HPIQVSR	7	0	835.466	H0Y2W2;Q9NVI7;Q8N3E6;Q9H834;Q96T67;Q5T9A4	H0Y2W2	285	291	ATAD3A;DKFZp761L1023;ATAD3B	ATPase family AAA domain-containing protein 3A;ATPase family AAA domain-containing protein 3B	yes	2	0.021545	128.86	1	90205000
HPQPGAVELAAK	12	0	1216.66	Q53SY7;F8VPD4;P27708;H7C2E4	Q53SY7	1951	1962	CAD	CAD protein;Glutamine-dependent carbamoyl-phosphate synthase;Aspartate carbamoyltransferase;Dihydroorotase	yes	2	0.016028	50.791	1	82052000
HPVSLEQYLMEGSYNK	16	0	1893.89	R4GMR5;V9HW09;P48556;Q5U0B3;B4E2Y4;K7EJR3;K7EJC1	R4GMR5	165	180	PSMD8;HEL-S-91n	26S proteasome non-ATPase regulatory subunit 8	yes	2;3	3.4918e-08	101.5	2	247170000
HQDVPSQDDSKPTQR	15	1	1736.81	Q9NRN7	Q9NRN7	253	267	AASDHPPT	L-aminoadipate-semialdehyde dehydrogenase-phosphopantetheinyl transferase	yes	3	1.6691e-07	71.98	1	40814000
HQGVMVGMGQK	11	0	1170.56	Q8WVW5;Q53GK6;Q53G99;Q53G76;Q1KLZ0;P63261;P60709;B4DVQ0;B4E335;B4E3A4;A0A2R8Y793;I3L3I0;I3L1U9;B3KUD3;A1E282;G5E9R0;K7EM38;E7EVS6;I3L3R2;A0A2R8YGF8;J3KT65;Q562R1;C9JUM1;C9JZR7;C9JTX5;B7Z6P1;A8K3K1;P68133;P68032;Q7Z7J6;A6NL76;D2JYH4;P63267;P62736;Q13707;B3KW67;F8WB63;B8ZZJ2;C9JFL5;F6UVQ4;F6QUT6;B7Z6I1	Q8WVW5	28	38	PS1TP5BP1;ACTG1;ACTB;ACTBL2;ACTA1;ACTC1;ACTA2;ACTG2	Actin, cytoplasmic 2;Actin, cytoplasmic 2, N-terminally processed;Actin, cytoplasmic 1;Actin, cytoplasmic 1, N-terminally processed;Beta-actin-like protein 2;Actin, alpha skeletal muscle;Actin, alpha cardiac muscle 1;Actin, gamma-enteric smooth muscle;Actin, aortic smooth muscle	no	2	0.00012317	144.12	3	1990500000
HQNVQLPR	8	0	990.536	P26599;A6NLN1;A0A0U1RRM4;A0A0D9SF20;K7EK45;A0A087WUW5	P26599	411	418	PTBP1	Polypyrimidine tract-binding protein 1	yes	2	0.0036005	133.47	1	2151300000
HSEVQQANLK	10	0	1152.59	P35606	P35606	319	328	COPB2	Coatomer subunit beta	yes	2	0.0020567	125.16	1	38140000
HSGPNSADSANDGFVR	16	0	1629.71	B4DKS8;A0A024R7T3;P52597	B4DKS8	22	37	HNRPF;HNRNPF	Heterogeneous nuclear ribonucleoprotein F;Heterogeneous nuclear ribonucleoprotein F, N-terminally processed	yes	2;3	3.0844e-12	122.63	2	180830000
HSNALVDVLPPEADSSIMMLTSDQKPDVMYADIGGMDIQK	40	1	4331.05	A8K2M0;P43686	A8K2M0	135	174	PSMC4	26S protease regulatory subunit 6B	yes	3;4	0.00020971	41.021	2	488510000
HTGPNSPDTANDGFVR	16	0	1683.76	E9PCY7;G8JLB6;P31943;D6RIT2;D6RIU0;D6RBM0;E7EQJ0;D6RAM1;E5RGV0;D6R9T0;D6RFM3;D6RDU3;D6RJ04;D6RIH9;E5RGH4;H0YAQ2;P55795	E9PCY7	99	114	HNRNPH1;HNRNPH2	Heterogeneous nuclear ribonucleoprotein H;Heterogeneous nuclear ribonucleoprotein H, N-terminally processed;Heterogeneous nuclear ribonucleoprotein H2	no	2;3	2.4258e-06	113.24	2	2177400000
HVINFDLPSDIEEYVHR	17	0	2082.02	F6S8Q4;A0A0D9SFB3;A0A2R8YF78;A0A2R8YCW1;A0A0D9SG12;A0A2R8YFR4;A0A2U3TZJ9;A0A2R8YFS5;B5BTY4;A0A2R8Y4A4;Q59GX6;A0A2R8Y645;A0A0D9SF53;O00571;A0A2R8YDT5;A0A2R8Y7T2;A0A2R8Y5G6;Q5S4N1;A0A024R9A4;O15523;A0A0J9YVQ7;B4E132;A0A087WVZ1	F6S8Q4	479	495	DDX3X;DDX3Y	ATP-dependent RNA helicase DDX3X;ATP-dependent RNA helicase DDX3Y	yes	2;3;4	3.5242e-08	134.25	3	1003500000
HVIPMNPNTDDLFK	14	0	1639.8	B4DPW9;Q53GY0;P13797;A0A0A0MSQ0;U3KQI3	B4DPW9	118	131	PLS3	Plastin-3	yes	2	6.1484e-05	108.7	1	235380000
HWPFMVVNDAGRPK	14	1	1652.82	V9HW22;Q53GZ6;P11142;E9PKE3;Q96IS6;Q53HF2;E9PNE6;E9PN89;E9PQQ4;E9PQK7;E9PK54;E9PLF4;B4DTX2;E9PPY6;E9PN25	V9HW22	89	102	HEL-S-72p;HSPA8	Heat shock cognate 71 kDa protein	yes	3	6.7181e-06	103.88	1	120610000
HWPFQVINDGDKPK	14	1	1679.84	A8K5I0;A0A0G2JIW1;P0DMV9;P0DMV8;A0A1U9X7W4;B4DNT8;Q59EJ3;B4DWK5;B4DI39;Q9UQC1	A8K5I0	89	102	HEL-S-103;HSPA1B;HSPA1A;HSP70-1	Heat shock 70 kDa protein 1B;Heat shock 70 kDa protein 1A	yes	2;3	7.6635e-05	71.548	2	319570000
HYPVFENPK	9	0	1129.56	A0A024DAK3;Q59EC0;P55265;D3DV75;H0YCK3	A0A024DAK3	988	996	ADAR	Double-stranded RNA-specific adenosine deaminase	yes	2	0.024947	67.169	1	45048000
HYYEVSCHDQGLCR	14	0	1708.71	A3RJH1;Q92499;F1T0B3;A0A087X2G1	A3RJH1	133	146	DDX1	ATP-dependent RNA helicase DDX1	yes	2;3	6.5494e-07	143.89	2	0
IAELLSPGSVDPLTR	15	0	1566.86	A0A2R8Y6A7;A0A2R8YD12;A0A024QZX3;A0A024QZX5;A0A087X1N8;P35237;Q8IXH2	A0A2R8Y6A7	92	106	SERPINB6	Serpin B6	yes	2	1.6969e-06	84.658	1	52623000
IAELMPGASGAEVK	14	0	1371.71	A0A140VJS3;P62195	A0A140VJS3	347	360	PSMC5	26S protease regulatory subunit 8	yes	2	0.00017634	73.9	1	109860000
IAILTCPFEPPKPK	14	1	1552.87	E7ENZ3;B4DYC8;B7ZAR1;B4DDU6;B4DZT5;B4DXI1;E9PCA1;B4DX08;Q9BU08;V9HW37;P48643;B4DZY9;Q96GI1;B4DE30	E7ENZ3	193	206	CCT5;HEL-S-69	T-complex protein 1 subunit epsilon	yes	3	0.017592	41.644	1	0
IAIPGLAGAGNSVLLVSNLNPER	23	0	2274.27	P26599;A6NLN1;A0A0U1RRM4;K7EK45	P26599	326	348	PTBP1	Polypyrimidine tract-binding protein 1	yes	2;3	6.0614e-15	107.98	2	769360000
IAIYELLFK	9	0	1108.65	A0A2R8Y6L3;F6U211;Q59GE4;A0A2R8Y7H1;A0A2R8YFH6;A0A1W2PQS6;P46783	A0A2R8Y6L3	9	17	RPS10	40S ribosomal protein S10	yes	2	0.0053323	107.66	1	58029000
IANPVEGSTDR	11	0	1157.57	B4DRD7;H3BRU6;F8VZX2;Q15366;F8VRH0;H3BSS4	B4DRD7	240	250	PCBP2	Poly(rC)-binding protein 2	yes	2	0.018741	53.517	1	212050000
IAPLEEGTLPFNLAEAQR	18	0	1968.03	Q53GR7;Q9UJS0;Q75KX8;B7Z2E2	Q53GR7	293	310	SLC25A13	Calcium-binding mitochondrial carrier protein Aralar2	yes	2	9.4379e-06	70.889	1	68570000
IASHSHVK	8	0	877.477	B5BUB1;Q9Y265	B5BUB1	15	22	RUVBL1	RuvB-like 1	yes	2	0.040566	72.789	1	9688500
IASPEGQDYLK	11	0	1219.61	Q9Y3I0;B4DNA0	Q9Y3I0	298	308	RTCB	tRNA-splicing ligase RtcB homolog	yes	2	0.0043777	68.016	1	56573000
IATEKDFLEAVNK	13	1	1476.78	A0A140VK70;P35998;A0A1W2PQS1;Q75L23	A0A140VK70	403	415	PSMC2	26S protease regulatory subunit 7	yes	2	9.6941e-05	98.04	1	71717000
IDAVNAETIR	10	0	1100.58	Q9UG64;B3KQ85;B4DM90;Q96CP5;B3KM34;A8K1E9;G3V0E4;O75439	Q9UG64	269	278	DKFZp586I1223;PMPCB	Mitochondrial-processing peptidase subunit beta	yes	2	0.0022355	96.331	1	115770000
IDDIVSGHKK	10	1	1110.6	B4DUR8;B3KX11;Q2TU64;Q59H77;P49368	B4DUR8	474	483	CCT3	T-complex protein 1 subunit gamma	yes	2	0.013559	78.264	1	54857000
IDEPLEGSEDRIITITGTQDQIQNAQYLLQNSVK	34	1	3828.94	B4DUQ1;A0A024R228;P61978;B4DFF1;Q5EC54;B3KU16	B4DUQ1	399	432	HNRPK;HNRNPK	Heterogeneous nuclear ribonucleoprotein K	yes	3	0.042501	20.444	1	45437000
IDILDSALLRPGR	13	1	1437.83	A0A140VJS3;P62195;Q59GS3	A0A140VJS3	298	310	PSMC5	26S protease regulatory subunit 8	yes	2;3	1.2008e-05	137.59	2	1321800000
IDKVNEIVETNRPDSK	16	2	1855.96	Q15008;B3KT66	Q15008	347	362	PSMD6	26S proteasome non-ATPase regulatory subunit 6	yes	2;3;4	9.3736e-08	132.79	3	1175100000
IDPTVTMMQVEEKPDVTYSDVGGCK	25	1	2741.26	A0A140VK70;P35998;A0A1W2PQS1;Q75L23	A0A140VK70	157	181	PSMC2	26S protease regulatory subunit 7	yes	3	1.5577e-05	58.627	1	0
IEELQLIVNDK	11	0	1312.72	A0A140VJS3;P62195;Q59GS3;J3KRP2;J3QSA9;J3QQM1;J3QLH6;J3QSE0	A0A140VJS3	28	38	PSMC5	26S protease regulatory subunit 8	yes	2	0.00052131	120.31	3	75231000
IEFSLPDLEGR	11	0	1274.65	A0A140VK70;P35998;A0A1W2PQS1;Q75L23	A0A140VK70	341	351	PSMC2	26S protease regulatory subunit 7	yes	2	0.00028974	103.88	1	50544000
IESILMSLPLTAR	13	0	1442.82	P36551;H0YA22	P36551	414	426	CPOX	Oxygen-dependent coproporphyrinogen-III oxidase, mitochondrial	yes	2	8.5133e-07	152.62	1	69174000
IETLDPALIRPGR	13	1	1449.83	Q53XL8;Q53HB3;P62191	Q53XL8	334	346	PSMC1	26S protease regulatory subunit 4	yes	2;3	6.5745e-06	141.2	2	305320000
IEWLESHQDADIEDFKAK	18	1	2173.03	V9HWB4;P11021	V9HWB4	602	619	HEL-S-89n;HSPA5	78 kDa glucose-regulated protein	yes	3	0.0072519	43.208	1	65199000
IFHTVTTTDDPVIR	14	0	1613.84	B4E1K8;O15371;B0QYA4;B0QYA5	B4E1K8	126	139	EIF3D	Eukaryotic translation initiation factor 3 subunit D	yes	3	3.4625e-08	86.772	1	0
IFQIHTSR	8	0	1000.55	Q53XL8;Q53HB3;P62191	Q53XL8	364	371	PSMC1	26S protease regulatory subunit 4	yes	2	0.016105	96.253	1	572210000
IGDKEGALTAFR	12	1	1276.68	Q15008;B3KT66;C9J0E9	Q15008	114	125	PSMD6	26S proteasome non-ATPase regulatory subunit 6	yes	2;3	2.0707e-25	210.08	2	248050000
IGDTPMVR	8	0	887.453	P0DN79;P35520;B7Z2D6;C9JMA6;Q9NTF0	P0DN79	84	91	CBS;DKFZp727E011	Cystathionine beta-synthase	yes	2	1.1209e-05	163.84	1	228050000
IGGALSVALPALLLR	15	0	1462.92	Q6P9C2;B2RAL9;Q99956	Q6P9C2	38	52	DUSP9	Dual specificity protein phosphatase;Dual specificity protein phosphatase 9	yes	2	1.155e-06	137.98	1	52230000
IGGIGTVPVGR	11	0	1024.6	Q6IPT9;Q6IPS9;Q6IPN6;Q53HR5;Q53HQ7;Q53HM9;Q5VTE0;P68104;Q96RE1;A0A087WVQ9;A8K9C4;Q53GA1;Q53GE9;Q53G85;Q8IUB0;B4DNE0;Q504Z0;Q53HR1;Q9NZS6;Q53G89;Q96C29;Q8TBL1;Q6P082;Q96CD8;Q6P4C9;B4E2C5;Q16577;A0A2U3TZH3;Q05639;Q59GP5;Q14222	Q6IPT9	256	266	EEF1A1;EEF1A1P5;EEF1A1L14;PTI-1;EEF1A2;EEF1A	Elongation factor 1-alpha;Putative elongation factor 1-alpha-like 3;Elongation factor 1-alpha 1;Elongation factor 1-alpha 2	yes	2	0.0015811	128.38	1	1766400000
IGHPAPNFK	9	0	979.524	Q06830;A0A0A0MSI0;B2R4P2;A0A0A0MRQ5	Q06830	8	16	PRDX1	Peroxiredoxin-1	yes	2	0.0083527	86.866	1	76936000
IGIEIIKR	8	1	940.607	A0A024R3X4;P10809;B3GQS7;B7Z5E7;B7Z4F6;B7Z597	A0A024R3X4	463	470	HSPD1	60 kDa heat shock protein, mitochondrial	yes	2	0.00033821	153.15	1	51676000
IGLFYMDNDLITR	13	0	1569.79	Q15008;B3KT66;C9J0E9	Q15008	147	159	PSMD6	26S proteasome non-ATPase regulatory subunit 6	yes	2	0.0061413	57.019	1	89132000
IGNTGGMLDNILASK	15	0	1502.78	A0A024R1Y2;A0A024R1T9;Q4LE36;P53396;Q8N9C4	A0A024R1Y2	626	640	ACLY;ACLY variant protein	ATP-citrate synthase	yes	2	0.00011579	69.864	1	141180000
IGPILDNSTLQSEVKPILEK	20	1	2193.23	B3KQV6;Q8NB89;B4DE69;B4DQY1;B4DDF7;A8K7B7;A8K3H8;P30153;E9PH38;B4E1Q0	B3KQV6	368	387	PPP2R1A	Serine/threonine-protein phosphatase 2A 65 kDa regulatory subunit A alpha isoform	yes	3	0.00090063	49.655	1	104110000
IHAEFVQQK	9	0	1098.58	P19474	P19474	178	186	TRIM21	E3 ubiquitin-protein ligase TRIM21	yes	2;3	0.0028373	71.877	2	1047800000
IHAGPITK	8	0	835.492	A0A087X2I1;P62333;V9HW24	A0A087X2I1	329	336	PSMC6;HEL-S-73	26S protease regulatory subunit 10B	yes	2	0.015726	107.67	1	118220000
IHALPESVSIFSLK	14	0	1539.87	F5H6Z0;B4DGP5;A0A024RBH0;Q00537	F5H6Z0	427	440	CDK17;PCTK2	Cyclin-dependent kinase 17	yes	3	0.0029993	53.754	1	0
IHFPLATYAPVISAEK	16	0	1755.96	B3KT06;B3KPS3;P68363;P68366;B4DDU2;F8VVB9;C9JDS9;Q53GA7;F5H5D3;Q9BQE3;B7Z1K5;A0A1W2PQM2	B3KT06	230	245	TUBA1B;TUBA4A;TUBA1C	Tubulin alpha-1B chain;Tubulin alpha-4A chain;Tubulin alpha-1C chain	no	2;3	3.4641e-07	86.028	2	302450000
IHTPMEYK	8	0	1017.5	A0A087WZN1;O43837;A0A087X2E5;L0R875;B4DU38;Q99855	A0A087WZN1	115	122	IDH3B	Isocitrate dehydrogenase [NAD] subunit, mitochondrial;Isocitrate dehydrogenase [NAD] subunit beta, mitochondrial	yes	2	0.022408	84.097	1	155750000
IHVILAQK	8	0	920.581	A0A0S2Z5P5;Q9BTE3	A0A0S2Z5P5	307	314	MCMBP	Mini-chromosome maintenance complex-binding protein	yes	2	0.016048	96.048	1	53542000
IIAHAQLLEQHR	12	0	1427.8	Q53SY7;F8VPD4;P27708	Q53SY7	769	780	CAD	CAD protein;Glutamine-dependent carbamoyl-phosphate synthase;Aspartate carbamoyltransferase;Dihydroorotase	yes	3	0.00083922	63.091	1	70362000
IIANALSSEPACLAEIEEDKAR	22	1	2342.18	P78527	P78527	3336	3357	PRKDC	DNA-dependent protein kinase catalytic subunit	yes	3	9.7892e-05	54.672	1	0
IIAPPER	7	0	794.465	Q8WVW5;Q53GK6;Q53G99;Q53G76;Q1KLZ0;P63261;P60709;B4DVQ0;B4DW52;B4E335;B4E3A4;B3KWQ3;Q6PJ43;B7ZAP6;Q96DE1;Q96FU6;V9HVZ7;F1BXA6;A4UCT3;A5GZ75;B3KUD3;Q562R1;A0A2R8YFE2;B3KPP5;B7Z6P1;A8K3K1;P68133;P68032;Q7Z7J6;A6NL76;D2JYH4;P63267;P62736;B3KW67;B4DUI8	Q8WVW5	317	323	PS1TP5BP1;ACTG1;ACTB;HEL-176;ACTBL2;ACTA1;ACTC1;ACTA2;ACTG2	Actin, cytoplasmic 2;Actin, cytoplasmic 2, N-terminally processed;Actin, cytoplasmic 1;Actin, cytoplasmic 1, N-terminally processed;Beta-actin-like protein 2;Actin, alpha skeletal muscle;Actin, alpha cardiac muscle 1;Actin, gamma-enteric smooth muscle;Actin, aortic smooth muscle	no	2	0.03663	109.11	1	177890000
IIDRRPER	8	2	1053.6	Q8NC51;Q63HR1;Q5VU21;D3DQ70;D3DQ69	Q8NC51	123	130	SERBP1;DKFZp686P17171	Plasminogen activator inhibitor 1 RNA-binding protein	yes	3	0.01762	73.208	1	55106000
IILDLISESPIK	12	0	1339.8	B4DUQ1;A0A024R228;P61978;B4DFF1;Q5EC54;Q5T6W2	B4DUQ1	184	195	HNRPK;HNRNPK	Heterogeneous nuclear ribonucleoprotein K	yes	2	0.00076391	128.27	1	992920000
IILPPEKELAMPGEDLK	17	1	1892.03	P49411	P49411	389	405	TUFM	Elongation factor Tu, mitochondrial	yes	3	9.0772e-06	69.979	1	58257000
IINADSEDPKYIINVK	16	1	1830.97	A0A140VK70;P35998;A0A1W2PQS1;Q75L23;C9JLS9;B7Z571	A0A140VK70	101	116	PSMC2	26S protease regulatory subunit 7	yes	2;3	1.4806e-06	94.465	2	170110000
IINDLLQSLR	10	0	1183.69	A0A087WTP3;Q92945	A0A087WTP3	385	394	KHSRP	Far upstream element-binding protein 2	yes	2	0.0046548	81.972	1	46839000
IINEPTAAAIAYGLDKR	17	1	1814.99	V9HWB4;P11021;B4DEF7	V9HWB4	198	214	HEL-S-89n;HSPA5	78 kDa glucose-regulated protein	yes	2	1.2195e-06	124.86	1	117050000
IINEPTAAAIAYGLDR	16	0	1686.89	A8K5I0;A0A0G2JIW1;P0DMV9;P0DMV8;A0A1U9X7W4;B4DNT8;Q59EJ3;B4DWK5;B4DI39;B4E1S9;B4DFN9;B4DVU9;Q9UQC1;B4DHP5;Q53FC7;B3KSM6;B2R6X5;P17066	A8K5I0	172	187	HEL-S-103;HSPA1B;HSPA1A;HSP70-1;HSPA6	Heat shock 70 kDa protein 1B;Heat shock 70 kDa protein 1A;Heat shock 70 kDa protein 6	no	2;3	4.6061e-07	110.56	2	1937500000
IINEPTAAALAYGLDK	16	0	1658.89	A0A2P9AAP7	A0A2P9AAP7	226	241			yes	2	7.0456e-07	82.362	1	269020000
IINEPTAAALAYGLDKK	17	1	1786.98	A0A2P9AAP7	A0A2P9AAP7	226	242			yes	2;3	1.756e-08	97.121	2	2085700000
IISSIEQK	8	0	916.523	V9HW98;G9K389;G9K388;P62258;B4DJF2;I3L3T1;K7EIT4;B4DJB0	V9HW98	62	69	HEL2;YWHAE/FAM22B fusion;YWHAE/FAM22A fusion;YWHAE	14-3-3 protein epsilon	yes	2	0.033212	76.774	1	24354000
IITITGTQDQIQNAQYLLQNSVK	23	0	2588.38	B4DUQ1;A0A024R228;P61978;B4DFF1;Q5EC54;B3KU16	B4DUQ1	410	432	HNRPK;HNRNPK	Heterogeneous nuclear ribonucleoprotein K	yes	2;3	2.6521e-07	92.063	2	1426600000
IITLTGPTNAIFK	13	0	1387.81	Q53SS8;Q15365	Q53SS8	58	70	PCBP1	Poly(rC)-binding protein 1	yes	2	0.0038422	60.064	1	267480000
IKDLLQQMEEGLK	13	1	1543.83	B4DWZ7;B3KTN5;Q9NS86	B4DWZ7	63	75	LANCL2	LanC-like protein 2	yes	2;3	5.5892e-06	97.452	2	216300000
IKDYLLMEEEFIR	13	1	1697.87	Q53XL8;Q53HB3;P62191	Q53XL8	68	80	PSMC1	26S protease regulatory subunit 4	yes	2;3	5.9189e-05	96.734	3	363260000
IKPVLMMNK	9	1	1072.61	P13639;Q6PK56;B4DPU3;B4DRE8;B4DMC6	P13639	151	159	EEF2	Elongation factor 2	yes	2;3	0.0017003	100.02	3	167990000
IKVPVDWSK	9	1	1070.61	B4DPW9;Q53GY0;P13797;A0A0A0MSQ0;Q96HI1;B4DG31;B4DI60;H7C4N2;B4DPU6	B4DPW9	409	417	PLS3	Plastin-3	yes	2	0.0033343	85.161	1	103110000
ILAEGGGAK	9	0	814.455	P49411	P49411	80	88	TUFM	Elongation factor Tu, mitochondrial	yes	2	0.003486	124.83	1	204000000
ILDLGITGPEGHVLSRPEEVEAEAVNR	27	1	2899.5	Q53ET2;Q86U75;Q59GB4;A0A1C7CYX9;Q16555	Q53ET2	212	238	DPYSL2	Dihydropyrimidinase-related protein 2	yes	4	0.012129	32.164	1	47584000
ILFFNTPK	8	0	978.554	R4GMR5;V9HW09;P48556;Q5U0B3;B4E2Y4;K7EJR3;K7EJC1	R4GMR5	227	234	PSMD8;HEL-S-91n	26S proteasome non-ATPase regulatory subunit 8	yes	2	0.0096562	120.49	1	95404000
ILFTEATR	8	0	949.523	R4GMR5;V9HW09;P48556;Q5U0B3;B4E2Y4;K7EJR3;K7EJC1	R4GMR5	219	226	PSMD8;HEL-S-91n	26S proteasome non-ATPase regulatory subunit 8	yes	2	1.1068e-07	170.06	1	195250000
ILGLLDAYLK	10	0	1117.67	Q53YD7;P26641;B4DUP0;B4DUK7	Q53YD7	138	147	EEF1G	Elongation factor 1-gamma	yes	2	0.0050323	80.438	1	42591000
ILGPGLNK	8	0	810.496	A0A024RCW3;Q1JQ76;P62906	A0A024RCW3	39	46	RPL10A	Ribosomal protein;60S ribosomal protein L10a	yes	2	0.019763	85.89	1	28028000
ILGPQGNTIK	10	0	1039.6	B4E043;B4DDX2;Q07666;B2R7B5	B4E043	80	89	KHDRBS1	KH domain-containing, RNA-binding, signal transduction-associated protein 1	yes	2	0.0059213	76.827	1	799520000
ILGPQGNTIKR	11	1	1195.7	B4E043;B4DDX2;Q07666;B2R7B5	B4E043	80	90	KHDRBS1	KH domain-containing, RNA-binding, signal transduction-associated protein 1	yes	2	0.0036817	126.07	1	60020000
ILHENTQTDK	10	0	1197.6	B2RD24;A0A087WVM4;B7ZM99;Q6UB35	B2RD24	262	271	MTHFD1L	Monofunctional C1-tetrahydrofolate synthase, mitochondrial	yes	2	0.018216	60.91	1	57575000
ILLELLNQMDGFDQNVNVK	19	0	2202.14	A8K2M0;P43686	A8K2M0	288	306	PSMC4	26S protease regulatory subunit 6B	yes	2;3	4.0821e-13	115.31	2	549110000
ILPNKVDPLVSLMMVEK	17	1	1925.07	A0A140VJS3;P62195;Q59GS3;J3KRP2;J3QSA9;J3QQM1;J3QLH6;J3QRW1;J3QSE0	A0A140VJS3	126	142	PSMC5	26S protease regulatory subunit 8	yes	2	0.012063	51.135	1	253650000
ILPTLEAVAALGNK	14	0	1408.83	X6R6Z1;B4DY09;Q53FG3;F4ZW63;F4ZW62;Q12905	X6R6Z1	90	103	ILF2	Interleukin enhancer-binding factor 2	yes	2	8.3946e-06	93.058	1	31970000
ILRPWQSSETR	11	1	1371.73	A0A024R588;A0A024R566;B4DJU4;A0A024R5D9;A0A024R572;Q15637;B4DSE4;B4DX42	A0A024R588	261	271	SF1	Splicing factor 1	yes	2	4.9171e-06	156.83	1	110300000
ILSISADIETIGEILKK	17	1	1842.07	B4DUQ1;A0A024R228;P61978;Q5T6W2	B4DUQ1	87	103	HNRPK;HNRNPK	Heterogeneous nuclear ribonucleoprotein K	yes	3	7.1768e-06	73.464	3	104600000
ILSTIDRELLKPNASVALHK	20	2	2217.28	A8K2M0;P43686	A8K2M0	115	134	PSMC4	26S protease regulatory subunit 6B	yes	3;4	2.4058e-06	69.763	2	225140000
ILVATNLFGR	10	0	1102.65	B4DX78;O00148;Q5STU3;A0A024RCM3;Q13838;Q69YT6;H0Y400;A0A140T9X3;A0A0G2JJZ9;B4DP52	B4DX78	382	391	DDX39A;DDX39B;hCG_2005638;DKFZp547B159	ATP-dependent RNA helicase DDX39A;Spliceosome RNA helicase DDX39B	yes	2	4.3954e-05	102.51	1	0
ILYNGQSVEVDGHSMR	16	0	1803.86	Q59FI2;H0Y6Z7;P10586;H0Y4H1;H0Y7Z9;Q5W9G3;Q7Z3X4;B3KWM1;B3KXA8;H0Y380	Q59FI2	691	706	PTPRF;LAR;DKFZp686B1310	Receptor-type tyrosine-protein phosphatase F;Protein-tyrosine-phosphatase	yes	3	0.015168	42.314	1	21267000
IMGPNYTPGK	10	0	1076.53	P13639;Q8TA90;Q6PK56	P13639	429	438	EEF2	Elongation factor 2	yes	2	0.0056984	77.732	1	1030000000
IMGPNYTPGKK	11	1	1204.63	P13639;Q8TA90;Q6PK56	P13639	429	439	EEF2	Elongation factor 2	yes	2;3	0.0063284	73.985	2	336320000
IMLEDGNLHVTQGAGR	16	0	1709.85	Q6DEN2;A0A140VK07;Q8IXW6;Q14195;B4DLZ4	Q6DEN2	566	581	DPYSL3	Dihydropyrimidinase-related protein 3	yes	3	4.6397e-07	89.541	1	34813000
IMLNTPEDVQALVSGK	16	0	1713.9	O00231;B4DTS5	O00231	259	274	PSMD11	26S proteasome non-ATPase regulatory subunit 11	yes	2	8.2999e-05	68.515	1	292850000
IMNTFSVVPSPK	12	0	1318.7	B4DE77;P04350;M0R2D3;M0R042;M0QYM7;B7ZAF0;Q5JP53;Q5SU16;P07437;Q5ST81;Q6LC01;B4DY90;B7ZAK1;Q9BUU9;B4E052;B4DQN9;Q1KSF8;Q8IZ29;Q8IWP6;P68371;Q8N6N5;B3KML9	B7ZAF0	134	145	TUBB4A;TUBB;XTP3TPATP1;TUBB2C;TUBB4B	Tubulin beta-4A chain;Tubulin beta chain;Tubulin beta-4B chain	no	2	0.0014689	73.067	1	136660000
INISEGNCPER	11	0	1230.57	B4DRD7;H3BRU6;F8VZX2;Q15366;F8VXH9;B4DLC0;F8W0G4;F8W1G6;J3QT27;Q5MJP6;E9PFP8;P57721;F8VTZ0;Q53SS8;Q15365	B4DRD7	9	19	PCBP2;PCBP3;PCBP1	Poly(rC)-binding protein 2;Poly(rC)-binding protein 3;Poly(rC)-binding protein 1	no	2	0.00039639	120.15	1	0
INLANCTSR	9	0	990.492	B4DSL6;A8K5D9;A0A024RA49;Q9NQW6;H7C3S1	B4DSL6	909	917	ANLN	Actin-binding protein anillin	yes	2	0.00053887	136.27	1	0
INNFSADIK	9	0	1020.52	B4DPW9;Q53GY0;P13797;A0A0A0MSQ0;Q96HI1	B4DPW9	262	270	PLS3	Plastin-3	yes	2	0.0070884	88.948	1	66165000
INVYYNEATGGK	12	0	1327.64	Q8IZ29;Q8IWP6;P68371;Q8N6N5;B3KML9;B4DNW1	Q8IZ29	47	58	TUBB2C;TUBB4B	Tubulin beta-4B chain	yes	2	1.9451e-05	90.108	1	0
IPAMTIAK	8	0	843.489	A0A024R3X4;P10809;B3GQS7;B7Z5E7;B7Z4F6;B7Z597	A0A024R3X4	474	481	HSPD1	60 kDa heat shock protein, mitochondrial	yes	2	0.01761	101.64	1	125590000
IPDEFDNDPILVQQLR	16	0	1910.97	Q0VAB1;A0A024R0M6;Q3ZCQ8;M0R047	Q0VAB1	201	216	TIMM50	Mitochondrial import inner membrane translocase subunit TIM50	yes	2	0.01039	49.35	1	34311000
IPDWFLNR	8	0	1059.55	P62269;J3JS69	P62269	79	86	RPS18	40S ribosomal protein S18	yes	2	0.0083874	122.78	1	48478000
IPGLLSPHPLLQLSYTATDR	20	0	2191.2	A0A0U1RQF0;P49327;Q6PJJ3	A0A0U1RQF0	1254	1273	FASN	Fatty acid synthase;[Acyl-carrier-protein] S-acetyltransferase;[Acyl-carrier-protein] S-malonyltransferase;3-oxoacyl-[acyl-carrier-protein] synthase;3-oxoacyl-[acyl-carrier-protein] reductase;3-hydroxyacyl-[acyl-carrier-protein] dehydratase;Enoyl-[acyl-carrier-protein] reductase;Oleoyl-[acyl-carrier-protein] hydrolase	yes	3	0.00019497	52.866	1	70188000
IPLLSDLTHQISK	13	0	1463.83	V9HW63;Q13162;H7C3T4;A6NJJ0	V9HW63	174	186	HEL-S-97n;PRDX4	Peroxiredoxin-4	yes	2;3	2.7416e-05	89.548	2	368280000
IPPPVIMVQNVSFK	14	0	1567.88	A0A090N7X1;A0A090N7Y2;Q9UG63	A0A090N7X1	391	404	ABCF2	ATP-binding cassette sub-family F member 2	yes	2	0.0013345	62.528	1	119450000
IQDKEGIPPDQQR	13	1	1522.77	J3QS39;J3QTR3;F5H6Q2;Q3MIH3;F5GYU3;F5H2Z3;A0A248RGE3;F5H265;Q5UGI3;B4DV12;F5H388;Q5RKT7;B2RDW1;F5H747;F5GXK7;J3QKN0;Q5U5U6;Q5PY61;Q9UFQ0;Q96C32;Q96MH4;L8B4I8;L8B196;Q96H31;L8B4R0;A8K674;L8B4Z6;L8B4M0;L8B4J3;Q66K58;Q59EM9;P62987;P62979;P0CG47;P0CG48;J3QSA3;F5GZ39;M0R1V7;Q49A90;M0R1M6;M0R2S1;A0A2R8Y422	J3QS39	30	42	UBB;RPS27A;UBC;UBA52;HEL112;DKFZp434K0435;UbC	Ubiquitin-60S ribosomal protein L40;Ubiquitin;60S ribosomal protein L40;Ubiquitin-40S ribosomal protein S27a;Ubiquitin;40S ribosomal protein S27a;Polyubiquitin-B;Ubiquitin;Polyubiquitin-C;Ubiquitin	yes	2	0.003195	68.069	1	35232000
IQEIIEQLDVTTSEYEKEK	19	1	2294.15	A0A024R3X4;P10809;B7Z5E7;B7Z597	A0A024R3X4	371	389	HSPD1	60 kDa heat shock protein, mitochondrial	yes	3	0.005387	43.955	1	141850000
IQKEEEEILMANKR	14	2	1729.9	Q4VCS5;A6NP16;A2BDD9;E7ERM3	Q4VCS5	727	740	AMOT	Angiomotin	yes	3;4	3.8092e-06	93.348	2	283230000
IQLLDLPGIIEGAK	14	0	1478.87	Q9Y295	Q9Y295	113	126	DRG1	Developmentally-regulated GTP-binding protein 1	yes	2	0.00059234	64.878	1	28117000
IQLQDAGR	8	0	899.482	K4DIB6;K4DIB3;K4DIB8;K4DIA8;E9PS95;A0A0D9SEI9;A0A0D9SFE1;A0A024RCA6;E9PJH7;A0A024R0W0;Q9H1K4;Q9H936	K4DIB6	129	136	SLC25A22;SLC25A18	Mitochondrial glutamate carrier 2;Mitochondrial glutamate carrier 1	yes	2	0.01576	107.59	1	85591000
IQSGQCLR	8	0	903.46	A0MNN4;Q2TAY7	A0MNN4	293	300	SMU1	WD40 repeat-containing protein SMU1;WD40 repeat-containing protein SMU1, N-terminally processed	yes	2	0.010693	101.69	1	0
IQTQPGYANTLR	12	0	1360.71	F8VVM2;Q8NCF7;Q53HC3;B2RE88;A0A024RBE8;A0A024RBH9;Q00325	F8VVM2	189	200	SLC25A3	Phosphate carrier protein, mitochondrial	yes	2	0.00053828	132.78	1	1106400000
IREEFPDR	8	1	1060.53	B4DE77;P04350;B4E386;K7ESM5;B3KS31;B4DP54;Q9BUF5;M0R042;M0QYM7;K7ES63	B4DE77	120	127	TUBB4A;TUBB6	Tubulin beta-4A chain;Tubulin beta-6 chain	yes	2	0.023249	62.969	1	22685000
ISDDLMQK	8	0	948.459	Q6IBN0;O43242;B3KNN7;Q96N86;B4DV84;B4DEB0;B4DPM7;Q8N9M2;H0YGV8	Q6IBN0	187	194	PSMD3	26S proteasome non-ATPase regulatory subunit 3	yes	2	0.037844	74.255	1	361450000
ISEQFTAMFR	10	0	1228.59	B4DE77;P04350;B4DJ43;B4DFH6;B7ZAF0;Q5JP53;Q5SU16;P07437;Q5ST81;Q6LC01;B4DY90;B7ZAK1;Q9BUU9;B4E052;B4DQN9;B2R6L0;Q96B85;B4DXZ5;B4DMU8;B4DMJ5;Q6P602;A4UCU2;Q8IZ29;Q8IWP6;P68371;Q8N6N5;B3KML9;Q96HX0;Q9BVA1;Q13885;A0A024QZU2;O43209;B7Z4N1	B7ZAF0	352	361	TUBB4A;TUBB;TUBB2C;TUBB4B;TUBB2B;TUBB2A	Tubulin beta-4A chain;Tubulin beta chain;Tubulin beta-4B chain;Tubulin beta-2B chain;Tubulin beta-2A chain	no	2	3.4245e-05	99.802	2	66095000
ISGADINSICQESGMLAVR	19	0	1962.95	A8K2M0;P43686	A8K2M0	370	388	PSMC4	26S protease regulatory subunit 6B	yes	2	2.8339e-10	126.83	1	0
ISIQCR	6	0	718.38	B1AHB0;P33992;Q53FG5;A8K521;B1AHB1;B4DQ39;B3KVF0;B4DVK5;B1AHA9;B1AHB2	B1AHB0	168	173	MCM5	DNA helicase;DNA replication licensing factor MCM5	yes	2	0.013139	130.65	1	0
ISKEEAMR	8	1	962.486	Q5VVC8;Q08ES8;Q5VVD0;P62913	Q5VVC8	146	153	RPL11	60S ribosomal protein L11	yes	2	9.5513e-05	160.03	1	19133000
ISLADIAQK	9	0	957.549	Q6IBN0;O43242;B3KNN7;Q96N86;B4DV84;B4DEB0;B4DPM7;Q8N9M2	Q6IBN0	417	425	PSMD3	26S proteasome non-ATPase regulatory subunit 3	yes	2	0.00047001	147.04	1	52252000
ISLGLPVGAVINCADNTGAK	20	0	1912.01	C9JD32;B9ZVP7;J3KT29;Q9BTQ7;A0A024R1Q8;P62829	C9JD32	20	39	RPL23	60S ribosomal protein L23	yes	2	0.0027413	46.964	1	0
ISLQAIQQLVR	11	0	1267.76	E9PF10;A0A024R071;O75694;B4DLT2	E9PF10	776	786	NUP155	Nuclear pore complex protein Nup155	yes	2	1.4003e-08	167.33	1	32200000
ISQMPVILTPLHFDRDPLQK	20	1	2347.27	B4DUT7;Q53F90;A0A140VJK6;P49915	B4DUT7	557	576	GMPS	GMP synthase [glutamine-hydrolyzing]	yes	3	0.00010989	67.43	1	0
ISVMGGEQAANVLATITK	18	0	1801.96	A0A140VK29;Q9HCC0;D6RD67	A0A140VK29	470	487	MCCC2	Methylcrotonoyl-CoA carboxylase beta chain, mitochondrial	yes	2	3.7498e-09	98.531	1	75648000
ISVYYNEATGGK	12	0	1300.63	B7ZAF0;Q5JP53;Q5SU16;P07437;Q6LC01;B4DY90;B4DMU8;B4DMJ5	B7ZAF0	18	29	TUBB	Tubulin beta chain	yes	1;2	0.00066231	116.3	2	173240000
ITFCTGIR	8	0	909.474	Q5VWC4;P55036;A6PVX3	Q5VWC4	84	91	PSMD4	26S proteasome non-ATPase regulatory subunit 4	yes	2	0.028664	79.451	1	0
ITIGQAPTEK	10	0	1056.58	A0A024R652;F5H2F4;B7Z809;P11586	A0A024R652	544	553	MTHFD1	C-1-tetrahydrofolate synthase, cytoplasmic;Methylenetetrahydrofolate dehydrogenase;Methenyltetrahydrofolate cyclohydrolase;Formyltetrahydrofolate synthetase;C-1-tetrahydrofolate synthase, cytoplasmic, N-terminally processed	yes	2	0.0029693	88.819	1	48354000
ITITNDKGR	9	1	1016.56	V9HW22;Q53GZ6;P11142;E9PKE3;Q96IS6;B3KTV0;E9PNE6;B4E1Q1;A8K7Q2;E9PS65;Q96BE0;A0A024R6B5;P54652;E9PM13;Q96H53;B3KUS2;A8K5I0;A0A0G2JIW1;P0DMV9;P0DMV8;A0A1U9X7W4;B4DNT8;Q59EJ3;B4DWK5;B4DI39;B4E1S9;B4DFN9;B4E388;B4DVU9;V9GZ37;B3KTT5;B4DNX1;B4E1T6;B4DHP5;Q53FA3;B2RCQ9;A0A1U9X7X9;A0A1U9X7X4;A0A1U9X7W7;B4DI54;P34931;B4DXY3;Q53FC7;B3KSM6;B2R6X5;P17066	A8K5I0	501	509	HEL-S-72p;HSPA8;HSPA2;HEL-S-103;HSPA1B;HSPA1A;HSPA1L;HSPA6	Heat shock cognate 71 kDa protein;Heat shock-related 70 kDa protein 2;Heat shock 70 kDa protein 1B;Heat shock 70 kDa protein 1A;Heat shock 70 kDa protein 1-like;Heat shock 70 kDa protein 6	no	2	3.155e-11	187.55	1	389800000
ITITNDQNR	9	0	1073.55	V9HWB4;P11021	V9HWB4	524	532	HEL-S-89n;HSPA5	78 kDa glucose-regulated protein	yes	2	0.00067642	143.61	1	52906000
ITPSYVAFTPEGER	14	0	1565.77	V9HWB4;P11021;B4DEF7	V9HWB4	61	74	HEL-S-89n;HSPA5	78 kDa glucose-regulated protein	yes	2	0.00013671	74.76	1	111380000
ITQSNAILR	9	0	1014.58	A4UJ43;A0A0A0MTN3;Q6FGJ9;Q59EJ5;P21266;Q6ZSP8;Q5T8Q9;Q5T8R2;Q5T8R1;P46439;Q9UE37;E9PLF1;E9PHN7;A8HT81;E9PHN6;Q0D2I8;F6XZQ7;P28161	A4UJ43	74	82	GSTM3;GSTM5;GSTmu3;GSTM2	Glutathione S-transferase Mu 3;Glutathione S-transferase Mu 5;Glutathione S-transferase Mu 2	no	2	0.0050937	109.01	1	55833000
IVAERPGTNSTGPAPMAPPR	20	1	2018.04	B2R8R5;Q13263;M0R0K9	B2R8R5	408	427	TRIM28	Transcription intermediary factor 1-beta	yes	3	3.8993e-10	105.77	1	139710000
IVAPGKGILAADESTGSIAKR	21	2	2053.15	H3BUH7;H3BPS8;H3BQN4;V9HWN7;J3KPS3;P04075	H3BUH7	23	43	ALDOA;HEL-S-87p	Fructose-bisphosphate aldolase;Fructose-bisphosphate aldolase A	yes	4	0.00067935	49.188	1	79297000
IVDQIRPDR	9	1	1110.61	A0A1X7SBZ2;A0A1W2PQ51;Q59F66;Q92841;J3KRZ1;J3QSF1;B4DN41;J3KTA4;B5BUE6;P17844;Q7Z2V5;Q59E92;B4DNG2	A0A1X7SBZ2	342	350	DDX17;DDX5;DKFZp686J01190	Probable ATP-dependent RNA helicase DDX17;Probable ATP-dependent RNA helicase DDX5	no	2	0.042653	83.753	1	98826000
IVFDSIDNLEAAPHDIGYVK	20	0	2215.12	H7C286;C9JEV6;Q9UJ70;E9PPU6;H7C3G9;H0YC94;H0YEB7	H7C286	18	37	NAGK	N-acetyl-D-glucosamine kinase	yes	3	0.00020508	52.298	1	69626000
IVGWYHTGPK	10	0	1156.6	P51665;B2RD27;H3BNT7;H3BTM8;B4DXI8	P51665	91	100	PSMD7	26S proteasome non-ATPase regulatory subunit 7	yes	2	0.010473	69.423	1	561680000
IWCFGPDGTGPNILTDITK	19	0	2047.01	P13639;Q8TA90;B4DPU3;Q6W6M8	P13639	649	667	EEF2	Elongation factor 2	yes	2	5.5477e-10	96.591	1	0
IWHHTFYNELR	11	0	1514.74	Q8WVW5;Q53GK6;Q53G99;Q53G76;Q1KLZ0;P63261;P60709;B4DVQ0;B4DW52;B4E335;B4E3A4;A0A2R8Y793;I3L3I0;I3L1U9;I3L4N8;A1E282;G5E9R0;K7EM38;E7EVS6;I3L3R2;A0A2R8YGF8;J3KT65;Q6S8J3;A5A3E0;C9JUM1;C9JZR7;Q562Z7;Q562Y6;Q562X9;Q562S0;Q562N8;Q562N0;Q562L5;Q9BYX7;P0CG38;Q562Y8;Q562N2;Q562M5;Q562M3;Q562U2;Q562P9;Q562N6;Q562N4;Q562L6;L0R5C4;P0CG39;Q562Y4;Q562X7;Q562X6;Q562X4;Q562X2;Q562X1;Q562X0;Q562W2;Q562U1;Q562U0…	Q8WVW5	73	83	PS1TP5BP1;ACTG1;ACTB;POTEE;POTEF;ACT;POTEKP;POTEI;POTEM;POTEJ;ACTA1;ACTC1	Actin, cytoplasmic 2;Actin, cytoplasmic 2, N-terminally processed;Actin, cytoplasmic 1;Actin, cytoplasmic 1, N-terminally processed;POTE ankyrin domain family member E;POTE ankyrin domain family member F;Putative beta-actin-like protein 3;Putative beta-actin-like protein 3, N-terminally processed;POTE ankyrin domain family member I;POTE ankyrin domain family member J;Actin, alpha skeletal muscle;…	no	2;3	0.00011008	97.813	3	1223000000
KACQIFVR	8	1	963.532	Q7KYM9;Q59ES8;A0A087X0X3;P52272;M0QY96;M0R2I7;Q6P2D7	Q7KYM9	491	498	ORF;HNRNPM;HNRPM	Heterogeneous nuclear ribonucleoprotein M	yes	2	0.021057	45.718	1	0
KAPQHTAVGFK	11	1	1182.65	Q6IBN0;O43242;B3KNN7;Q96N86;B4DV84;B4DEB0;B4DPM7	Q6IBN0	315	325	PSMD3	26S proteasome non-ATPase regulatory subunit 3	yes	2	0.0022753	85.731	1	429440000
KDDEENYLDLFSHK	14	1	1751.8	B4E043;B4DDX2;Q07666;B2R7B5	B4E043	43	56	KHDRBS1	KH domain-containing, RNA-binding, signal transduction-associated protein 1	yes	2;3	4.3885e-05	113.8	2	168360000
KDLYANTVLSGGTTMYPGIADR	22	1	2342.16	Q8WVW5;Q53GK6;Q53G99;Q53G76;Q1KLZ0;P63261;P60709;B4DVQ0;B4DW52;B4E335;B4E3A4;A0A2R8Y793;B3KWQ3;Q6PJ43;B7ZAP6;Q96DE1;Q96FU6;V9HVZ7;F1BXA6;A4UCT3;A5GZ75;Q9UE89	Q8WVW5	279	300	PS1TP5BP1;ACTG1;ACTB;HEL-176	Actin, cytoplasmic 2;Actin, cytoplasmic 2, N-terminally processed;Actin, cytoplasmic 1;Actin, cytoplasmic 1, N-terminally processed	yes	2	0.031503	41.967	1	59915000
KEDALLYQSK	10	1	1193.63	Q5HY57;P50402	Q5HY57	44	53	EMD	Emerin	yes	2	0.012997	79.201	1	43677000
KEDLYLKPIQR	11	2	1401.8	P13639;Q8TA90;Q6PK56;B4DRE8	P13639	439	449	EEF2	Elongation factor 2	yes	2;3	0.00063428	140.83	2	1522700000
KEETQPPVALKK	12	2	1366.78	Q8NC51;Q63HR1;Q5VU21;D3DQ70;D3DQ69	Q8NC51	92	103	SERBP1;DKFZp686P17171	Plasminogen activator inhibitor 1 RNA-binding protein	yes	3	0.011778	43.502	1	163050000
KEGGLGPLNIPLLADVTR	18	1	1862.06	B4DF70;V9HW12;P32119;A6NIW5	B4DF70	92	109	HEL-S-2a;PRDX2	Peroxiredoxin-2	yes	2;3	3.1281e-10	65.808	2	112550000
KEMQPTHPIR	10	1	1235.64	V9HWD6;B5BU24;P31946;Q2F831;D0PNI1;E7EX29;P63104;B7Z2E6;H0YB80;B0AZS6;P27348;B4DY04;Q53S41;B4DMT8	P27348	158	167	HEL-S-1;YWHAB;YWHAZ;YWHAQ	14-3-3 protein beta/alpha;14-3-3 protein beta/alpha, N-terminally processed;14-3-3 protein zeta/delta;14-3-3 protein theta	no	2	0.0054443	96.331	1	25314000
KFAEALGSTEAK	12	1	1250.65	X5D2J9;Q499G6;X5D939;X5DNP5;B4DH52;X5DR09;P78347;A0A1W6S962;A8K9W7;B4DRA9	X5D2J9	436	447	GTF2I	General transcription factor II-I	yes	2	0.015895	42.001	1	91154000
KFGDPVVQSDMK	12	1	1349.66	A8K5I0;A0A0G2JIW1;P0DMV9;P0DMV8;A0A1U9X7W4;B4DNT8;Q59EJ3;B4DFN9;B4E388;B4DNX1	A8K5I0	77	88	HEL-S-103;HSPA1B;HSPA1A	Heat shock 70 kDa protein 1B;Heat shock 70 kDa protein 1A	yes	2	0.00062962	106.29	1	1165600000
KFPVFK	6	1	764.458	Q76LA1;P04080;A0A1W2PS52	Q76LA1	34	39	CSTB	Cystatin-B	yes	1	0.041837	66.994	1	208530000
KGDECELLGHSK	12	1	1314.62	P49411	P49411	286	297	TUFM	Elongation factor Tu, mitochondrial	yes	2	0.00016653	114.24	1	0
KGDLLLNR	8	1	927.55	Q15008;B3KT66	Q15008	372	379	PSMD6	26S proteasome non-ATPase regulatory subunit 6	yes	2	0.00075783	150.84	1	570680000
KGQTHTLEDFQR	12	1	1458.72	A0A0S2Z410;Q99714;Q5H928;A0A0S2Z434	A0A0S2Z410	105	116	HSD17B10	3-hydroxyacyl-CoA dehydrogenase type-2	yes	2	0.0014196	82.261	1	53019000
KGSLESPATDVFGSTEEGEKR	21	2	2223.07	A0A0S2Z489;O00232	A0A0S2Z489	330	350	PSMD12	26S proteasome non-ATPase regulatory subunit 12	yes	3;4	5.3918e-14	129.44	2	150650000
KGTDIMYTGTLDCWR	15	1	1758.81	Q6NVC0;P05141	Q6NVC0	270	284	SLC25A5	ADP/ATP translocase 2;ADP/ATP translocase 2, N-terminally processed	yes	2	1.1994e-10	156.01	1	0
KGTVEGFEPADNK	13	1	1390.67	H0YLA2;P37108	H0YLA2	43	55	SRP14	Signal recognition particle 14 kDa protein	yes	2	0.00031368	109.16	1	65804000
KHELLNSTR	9	1	1096.6	X5D2J9;Q499G6;X5D939;X5DNP5;B4DH52;X5DR09;P78347;A0A1W6S962;A8K9W7	X5D2J9	394	402	GTF2I	General transcription factor II-I	yes	2	0.032693	78.516	1	83958000
KHLEINPDHPIVETLR	16	1	1910.04	B4DMA2;B4DGL0;A0A024RD80;P08238;Q9H6X9;A8K3W9	B4DMA2	586	601	HSP90AB1	Heat shock protein HSP 90-beta	yes	4	0.042826	15.022	1	58645000
KIAEGAQQGDPLSR	14	1	1468.76	H7C286;C9JEV6;Q9UJ70;E9PPU6;H7C3G9	H7C286	71	84	NAGK	N-acetyl-D-glucosamine kinase	yes	2	0.013699	55.314	1	33004000
KIATEKDFLEAVNK	14	2	1604.88	A0A140VK70;P35998;A0A1W2PQS1;Q75L23	A0A140VK70	402	415	PSMC2	26S protease regulatory subunit 7	yes	3	0.0002335	56.648	1	87586000
KIEEIKDFLLTAR	13	2	1574.9	J3KSP2;J3KT73;J3QL01;A0A024R8P8;P63173	J3KSP2	4	16	RPL38	60S ribosomal protein L38	yes	2;3	2.2295e-09	158.56	2	481600000
KIEFPLPDEK	10	1	1214.65	Q53XL8;Q53HB3;P62191	Q53XL8	350	359	PSMC1	26S protease regulatory subunit 4	yes	2	0.019973	73.067	1	37048000
KIEFPLPDRR	10	2	1269.72	A8K2M0;P43686	A8K2M0	330	339	PSMC4	26S protease regulatory subunit 6B	yes	2;3	0.0021349	89.886	2	730640000
KIEFPPPNEEAR	12	1	1425.73	A0A140VJS3;P62195;Q59GS3	A0A140VJS3	314	325	PSMC5	26S protease regulatory subunit 8	yes	2;3	0.001689	79.82	3	284710000
KIEFVVVGPEAPLAAGIVGNLR	22	1	2248.29	Q15374;Q3B7A7;Q59HH3;P22102;C9JZG2;C9JKQ7;C9JBJ1;C9JTV6;F8WD69	Q15374	66	87	GART	Trifunctional purine biosynthetic protein adenosine-3;Phosphoribosylamine--glycine ligase;Phosphoribosylformylglycinamidine cyclo-ligase;Phosphoribosylglycinamide formyltransferase	yes	3	6.5727e-05	60.032	1	38533000
KIHIDLPNEQAR	12	1	1432.78	A0A087X2I1;P62333;V9HW24	A0A087X2I1	312	323	PSMC6;HEL-S-73	26S protease regulatory subunit 10B	yes	2;3	0.00028475	103.34	2	182010000
KINELTGIK	9	1	1014.61	A0A140VK70;P35998;A0A1W2PQS1;Q75L23;C9JLS9;B7Z571	A0A140VK70	58	66	PSMC2	26S protease regulatory subunit 7	yes	2	0.015557	98.033	1	1018600000
KISSIQSIVPALEIANAHR	19	1	2046.16	A0A024R3X4;P10809;B3GQS7;B7Z5E7;B7Z4F6;B7Z597;B7Z532;Q53QD5	A0A024R3X4	250	268	HSPD1	60 kDa heat shock protein, mitochondrial	yes	3	8.2371e-09	79.489	1	80384000
KIVDQIRPDR	10	2	1238.71	A0A1X7SBZ2;A0A1W2PQ51;Q59F66;Q92841;J3KRZ1;J3QSF1;B4DN41;J3KTA4;B5BUE6;P17844;Q7Z2V5;Q59E92;B4DNG2	A0A1X7SBZ2	341	350	DDX17;DDX5;DKFZp686J01190	Probable ATP-dependent RNA helicase DDX17;Probable ATP-dependent RNA helicase DDX5	no	3	0.016386	50.108	1	66283000
KKELEEIVQPIISK	14	2	1652.97	V9HWB4;P11021	V9HWB4	620	633	HEL-S-89n;HSPA5	78 kDa glucose-regulated protein	yes	2	0.029152	36.32	1	30254000
KKEPEPNFQLLDNPAR	16	2	1894.99	Q99460;B2R6D0;A0A087WW66	Q99460	868	883	PSMD1	26S proteasome non-ATPase regulatory subunit 1	yes	3	5.8416e-06	75.463	2	133310000
KKYEPPVPTR	10	2	1213.68	Q53XL8;Q53HB3;P62191	Q53XL8	23	32	PSMC1	26S protease regulatory subunit 4	yes	2;3	0.004196	82.645	2	111940000
KLDEAVAEAHLGK	13	1	1379.74	Q1RMG2;P23526	Q1RMG2	263	275	AHCY	Adenosylhomocysteinase	yes	3	0.03025	39.999	1	314340000
KLDYGQHVVAGTPGR	15	1	1596.84	A0A024R8W0;P38919	A0A024R8W0	152	166	DDX48;EIF4A3	Eukaryotic initiation factor 4A-III;Eukaryotic initiation factor 4A-III, N-terminally processed	yes	3	0.00077338	60.209	1	43813000
KLENCNYAVELGKHPAK	17	2	1912.98	B4DPW9;Q53GY0;P13797;A0A0A0MSQ0;Q96HI1;B4DG31;B4DI60;B4DPU6	B4DPW9	432	448	PLS3	Plastin-3	yes	3	6.9372e-05	62.813	1	0
KLGNNCVFAPADVTSEKDVQTALALAK	27	2	2802.46	A0A0S2Z410;Q99714;Q5H928;A0A0S2Z434	A0A0S2Z410	53	79	HSD17B10	3-hydroxyacyl-CoA dehydrogenase type-2	yes	3;4	3.2825e-08	69.639	2	0
KLPIDVTEGEVISLGLPFGK	20	1	2111.19	P26599;A6NLN1;A0A0U1RRM4;Q59H49;K7EKJ7;K7ES59;K7ELW5	P26599	65	84	PTBP1	Polypyrimidine tract-binding protein 1	yes	2;3	4.1279e-11	114.74	2	1253600000
KLQCLGLQSR	10	1	1144.64	A0A024R5N4;F5H0C4;Q9BRP4;F5H0F7	A0A024R5N4	245	254	WDR71;PAAF1	Proteasomal ATPase-associated factor 1	yes	2	0.017852	45.368	1	0
KLQQELEFLEVQEEYIKDEQK	21	2	2665.35	A8K2M0;P43686	A8K2M0	46	66	PSMC4	26S protease regulatory subunit 6B	yes	3;4	9.7014e-13	94.188	2	474370000
KMALIQMGSVEEAVQALIDLHNHDLGENHHLR	32	1	3617.82	P26599;A6NLN1;A0A0U1RRM4;A0A0D9SF20	P26599	492	523	PTBP1	Polypyrimidine tract-binding protein 1	yes	5;6	2.5527e-26	139.93	2	411890000
KMNVSPDVNYEELAR	15	1	1763.85	R4GNH3;A0A140VK42;P17980;E9PM69;A8K781	R4GNH3	356	370	PSMC3	26S protease regulatory subunit 6A	yes	2	2.565e-06	95.273	1	95616000
KNPLPPSVGVVDKK	14	2	1476.87	Q8NC51;Q63HR1;Q5VU21;D3DQ70;D3DQ69	Q8NC51	79	92	SERBP1;DKFZp686P17171	Plasminogen activator inhibitor 1 RNA-binding protein	yes	2;3	2.8257e-09	110.98	4	301730000
KPANDITSQLEINFGDLGR	19	1	2087.06	Q8NC51;Q63HR1;Q5VU21;D3DQ70;D3DQ69	Q8NC51	346	364	SERBP1;DKFZp686P17171	Plasminogen activator inhibitor 1 RNA-binding protein	yes	2;3	1.8757e-10	129.42	3	218700000
KPHTLLQR	8	1	991.593	B4DUT7;Q53F90;A0A140VJK6;P49915	B4DUT7	427	434	GMPS	GMP synthase [glutamine-hydrolyzing]	yes	2	0.026898	46.426	1	125200000
KPLLESGTLGTK	12	1	1242.72	A0A024R1A3;P22314;B4DDE4;B4DL67	A0A024R1A3	593	604	UBE1;UBA1	Ubiquitin-like modifier-activating enzyme 1	yes	2	0.00059608	138.25	1	190950000
KPLVIIAEDVDGEALSTLVLNR	22	1	2364.33	A0A024R3X4;P10809;B3GQS7;B7Z5E7;B7Z4F6;B7Z597;B7Z532;B9VPB4;B9VP19	A0A024R3X4	269	290	HSPD1	60 kDa heat shock protein, mitochondrial	yes	2;3	9.8428e-13	110.67	2	134140000
KPNEGADGQWKK	12	2	1356.68	Q8NC51;Q63HR1;Q5VU21;D3DQ70;D3DQ69	Q8NC51	310	321	SERBP1;DKFZp686P17171	Plasminogen activator inhibitor 1 RNA-binding protein	yes	2;3	0.00029947	117.95	2	355220000
KPTLDKPSPETFVK	14	2	1585.87	A0A1B0GV93;B4DWS6;B3KQJ0;D3DR22;Q53GQ0	A0A1B0GV93	208	221	HSD17B12	Very-long-chain 3-oxoacyl-CoA reductase	yes	3	0.0033799	51.939	1	65466000
KQEGTPEGLYL	11	1	1233.62	Q53XL8;Q53HB3;P62191	Q53XL8	430	440	PSMC1	26S protease regulatory subunit 4	yes	2	0.01263	65.305	1	53196000
KQTIDNSQGAYQEAFDISKK	20	2	2270.12	P27348;B4DY04;Q53S41;B4DMT8	P27348	139	158	YWHAQ	14-3-3 protein theta	yes	4	0.00014524	54.877	1	39415000
KSQLQR	6	1	758.44	B1AHB0;P33992;Q53FG5;A8K521;B1AHB1;B3KVF0;B1AHA9;F8WFD7;B4DN96;Q17RA1;Q9BWT7;Q9NVE5	B1AHB0	28	33	MCM5;CARD10;USP40	DNA helicase;DNA replication licensing factor MCM5;Caspase recruitment domain-containing protein 10;Ubiquitin carboxyl-terminal hydrolase 40	yes	2	0.006926	99.511	1	43647000
KVDIEVLSVLASLGASVHK	19	1	1964.13	A0A1B0GWJ0;A0A1B0GTJ7;X5D8S6;Q71UA4;B4DP46;A0A0A6YY92;P30566;A0A096LNY6;A0A096LNY5;B4DUM2;X5DP48;X5D2Z4;A0A1B0GTG9;A0A1B0GWF8;A8K4X6;A0A096LP92;A0A096LPA2	A0A1B0GWJ0	246	264	ADSL	Adenylosuccinate lyase	yes	3	5.2327e-06	66.702	1	33192000
KVDIIADAAYSIFQKPK	17	2	1906.06	B4E136;Q6YN16;B2R923;A0A024R159;B4DWC7	B4E136	100	116	HSDL2	Hydroxysteroid dehydrogenase-like protein 2	yes	3	1.1456e-05	71.558	1	89908000
KVESTGAVPEFKEEK	15	2	1676.86	B4E136;Q6YN16;B2R923;A0A024R159;B4DWC7	B4E136	164	178	HSDL2	Hydroxysteroid dehydrogenase-like protein 2	yes	3	0.015896	31.614	1	228020000
KVPQVSTPTLVEVSR	15	1	1638.93	C9JKR2;H0YA55;D6RHD5;B7WNR0;B4DPR2;F6KPG5;A0A0C4DGB6;A8K9P0;B2RBS8;B4DPP6;P02768;A0A087WWT3;Q56G89	C9JKR2	246	260	ALB	Serum albumin	yes	2	5.225e-06	83.047	1	1259300000
KVVGDVAYDEAK	12	1	1292.66	A0A024R652;F5H2F4;B7Z809;P11586	A0A024R652	251	262	MTHFD1	C-1-tetrahydrofolate synthase, cytoplasmic;Methylenetetrahydrofolate dehydrogenase;Methenyltetrahydrofolate cyclohydrolase;Formyltetrahydrofolate synthetase;C-1-tetrahydrofolate synthase, cytoplasmic, N-terminally processed	yes	2	0.0003943	97.214	1	75889000
KVVGDVAYDEAKER	14	2	1577.8	A0A024R652;F5H2F4;B7Z809;P11586	A0A024R652	251	264	MTHFD1	C-1-tetrahydrofolate synthase, cytoplasmic;Methylenetetrahydrofolate dehydrogenase;Methenyltetrahydrofolate cyclohydrolase;Formyltetrahydrofolate synthetase;C-1-tetrahydrofolate synthase, cytoplasmic, N-terminally processed	yes	2	1.12e-05	71.555	1	24169000
KYAQAIK	7	1	820.481	X5D2J9;Q499G6;X5D939;X5DNP5;B4DH52;X5DR09;P78347;A0A1W6S962;A8K9W7	X5D2J9	331	337	GTF2I	General transcription factor II-I	yes	2	0.032747	117.7	1	0
KYEDICPSTHNMDVPNIK	18	1	2102.98	F8WCJ1;C9J7B5;C9J4W5;I3L397;I3L504;Q9GZV4;Q6IS14;P63241	F8WCJ1	68	85	EIF5A2;EIF5A;EIF5AL1	Eukaryotic translation initiation factor 5A;Eukaryotic translation initiation factor 5A-2;Eukaryotic translation initiation factor 5A-1-like;Eukaryotic translation initiation factor 5A-1	yes	3	5.8614e-09	78.848	1	0
KYEPPVPTR	9	1	1085.59	Q53XL8;Q53HB3;P62191	Q53XL8	24	32	PSMC1	26S protease regulatory subunit 4	yes	2;3	0.002892	91.867	2	762880000
LAATNALLNSLEFTK	15	0	1604.88	B7Z5M1;J3KTM9;B2RBR9;Q14974;B7Z752	B7Z5M1	47	61	KPNB1	Importin subunit beta-1	yes	2	5.6078e-06	124.12	1	37047000
LAAVDATVNQVLASR	15	0	1526.84	Q15084	Q15084	217	231	PDIA6	Protein disulfide-isomerase A6	yes	2	7.3313e-06	119.76	1	49410000
LAGIINFQRPK	11	1	1255.74	A0A0S2Z489;O00232	A0A0S2Z489	409	419	PSMD12	26S proteasome non-ATPase regulatory subunit 12	yes	2	1.1103e-05	96.492	1	0
LAGPQLVQMFIGDGAK	16	0	1643.87	R4GNH3;A0A140VK42;P17980;E9PM69;A8K781;E9PKD5;E9PMD8;E9PN50	R4GNH3	235	250	PSMC3	26S protease regulatory subunit 6A	yes	2	4.6664e-07	96.103	1	448280000
LALFNPDVCWDR	12	0	1447.69	A0A024R9Z0;O00483	A0A024R9Z0	36	47	NDUFA4	Cytochrome c oxidase subunit NDUFA4	yes	2	0.00018126	114.5	1	0
LALSQNQQSSGAAGPTGK	18	0	1713.86	D6RDI2;Q6PKC2;Q86Y74;B4DJ96;A8K3C5;J3KPP4;O95232	D6RDI2	156	173	LUC7L3;CROP	Luc7-like protein 3	yes	2	6.7635e-10	129.71	1	103780000
LAQGLTHLGK	10	0	1036.6	Q59EG8;Q13200;B4DM22;Q13041	Q59EG8	769	778	PSMD2	26S proteasome non-ATPase regulatory subunit 2	yes	2	0.02224	58.23	1	681740000
LAQHITYVHQHSR	13	0	1588.82	B2RBA6;A0A0S2Z4A5;P33993;Q9H4N9;B3KUD7;B4DDF5;C6EMX8	B2RBA6	533	545	MCM7	DNA helicase;DNA replication licensing factor MCM7	yes	2	0.0055246	57.836	1	129400000
LAQQSQALQELISELDRR	18	1	2097.12	P19474	P19474	218	235	TRIM21	E3 ubiquitin-protein ligase TRIM21	yes	2;3	2.6235e-15	155.22	2	1349100000
LASDGATWADIFKR	14	1	1549.79	Q8NHP8	Q8NHP8	355	368	PLBD2	Putative phospholipase B-like 2;Putative phospholipase B-like 2 32 kDa form;Putative phospholipase B-like 2 45 kDa form	yes	3	4.4533e-05	118.87	1	46032000
LATNAAVTVLR	11	0	1127.67	Q7Z759;Q53HU0;P50990;H7C2U0	Q7Z759	459	469	CCT8	T-complex protein 1 subunit theta	yes	2	0.00073886	109.66	1	35443000
LATNTSAPDLK	11	0	1129.6	E7EVA0;P27816;Q8NDS5;B4DSQ1;H0Y2V1;H7C4C5;A0A024R2V0;B5MEG9;F8W9U4;Q86Y04	E7EVA0	2068	2078	MAP4;DKFZp547H1810	Microtubule-associated protein;Microtubule-associated protein 4	yes	2	0.00029265	99.013	1	69097000
LAVNMVPFPR	10	0	1142.63	B4DE77;P04350;B4DJ43;B4DFH6;B4E386;K7ESM5;B3KS31;B4DP54;Q3ZCM7;Q9BUF5;A0A183YE00;B7ZAF0;Q5JP53;Q5SU16;P07437;Q5ST81;Q6LC01;B4DY90;Q9BUU9;B4E052;B4DQN9;B2R6L0;Q96B85;B4DXZ5;B4DMU8;Q1KSF8;A0A075B736;Q5SQY0;A6NNZ2;Q8IZ29;Q8IWP6;P68371;Q8N6N5;B3KML9;Q96HX0;Q9BVA1;Q13885;A0A024QZU2;O43209;B7Z4N1;Q9UGA2	B7ZAF0	224	233	TUBB4A;TUBB6;TUBB8;TUBB;XTP3TPATP1;TUBB2C;TUBB4B;TUBB2B;TUBB2A;DKFZp566F223	Tubulin beta-4A chain;Tubulin beta-8 chain;Tubulin beta-6 chain;Tubulin beta chain;Tubulin beta-8 chain-like protein LOC260334;Tubulin beta-4B chain;Tubulin beta-2B chain;Tubulin beta-2A chain	no	2	1.5176e-12	186.94	1	623310000
LCLWDLAEGR	10	0	1174.58	Q9BYB4;C9JPQ6	Q9BYB4	92	101	GNB1L	Guanine nucleotide-binding protein subunit beta-like protein 1	yes	2	0.0080544	54.982	1	0
LCMSLMQNK	9	0	1066.5	Q99460;B2R6D0;A0A087WW66;Q05CW6;Q05BX4;C9J9M4;H7BZR6	Q99460	183	191	PSMD1	26S proteasome non-ATPase regulatory subunit 1	yes	2	0.0012961	113.14	1	0
LCPNSTGAEIR	11	0	1159.57	A0A140VK70;P35998;A0A1W2PQS1;Q75L23	A0A140VK70	376	386	PSMC2	26S protease regulatory subunit 7	yes	2	0.00053062	76.827	1	0
LDHKFDLMYAK	11	1	1379.69	B3KT06;B3KPS3;P68363;A8JZY9;P68366;B4DDU2;B4DN58;Q15670;A6NHL2;Q53GA7;F5H5D3;Q9BQE3;B7Z1K5	B3KT06	356	366	TUBA1B;TUBA4A;TUBAL3;TUBA1C	Tubulin alpha-1B chain;Tubulin alpha-4A chain;Tubulin alpha chain-like 3;Tubulin alpha-1C chain	no	2;3	0.0011495	121.6	2	168100000
LDIDPSTITWQR	12	0	1443.74	B2RD24;A0A087WVM4;B7ZM99;Q6UB35	B2RD24	319	330	MTHFD1L	Monofunctional C1-tetrahydrofolate synthase, mitochondrial	yes	2	0.0003227	107.79	1	49111000
LDKSQIHDIVLVGGSTR	17	1	1837.01	V9HW22;Q53GZ6;P11142;E9PKE3;Q96IS6;B3KTV0;Q53HF2;E9PNE6;E9PN89;B4E1Q1;A8K7Q2	V9HW22	326	342	HEL-S-72p;HSPA8	Heat shock cognate 71 kDa protein	yes	2;3	8.6313e-07	99.941	2	46732000
LDLFANVVHVK	11	0	1253.71	A0A087WZN1;O43837;A0A087X2E5;L0R875	A0A087WZN1	136	146	IDH3B	Isocitrate dehydrogenase [NAD] subunit, mitochondrial;Isocitrate dehydrogenase [NAD] subunit beta, mitochondrial	yes	2	0.0083712	61.582	1	40193000
LDPGSEETQTLVR	13	0	1443.72	Q53YD7;P26641;B4DUP0	Q53YD7	402	414	EEF1G	Elongation factor 1-gamma	yes	2	0.020059	51.092	1	30716000
LEATINELV	9	0	1000.54	H9ZYJ2;P10599	H9ZYJ2	97	105	TXN	Thioredoxin	yes	1	0.014015	60.76	1	255640000
LEELKESILADK	12	1	1386.76	B1AJY5;B1AJY6;O75832;B1AJY7	O75832	19	30	PSMD10	26S proteasome non-ATPase regulatory subunit 10	no	2;3	1.5908e-09	185.77	70	87967000000
LEELKESILADKSLATR	17	2	1915.06	B1AJY5;B1AJY6;O75832;B1AJY7	O75832	19	35	PSMD10	26S proteasome non-ATPase regulatory subunit 10	no	2;3;4	9.3471e-30	172.09	5	600360000
LEELYTK	7	0	894.47	A0A024R201;J3KNQ3;Q53GN6;Q9Y6E3;Q9UNM6;B2RBM7;A0A087WUL9;E9PL38;E9PQG3;E9PPD2;Q5HYL3;F8W8J6	A0A024R201	25	31	PSMD13;DKFZp686H16220	26S proteasome non-ATPase regulatory subunit 13	yes	1;2	0.0050587	146.94	2	533290000
LEGIVNK	7	0	771.449	Q99460;B2R6D0;A0A087WW66;Q05CW6;Q05BX4;C9J9M4;H7BZR6	Q99460	130	136	PSMD1	26S proteasome non-ATPase regulatory subunit 1	yes	2	0.032232	99.384	1	102360000
LEHEEGAPCTAIR	13	0	1424.67	F5H6Z0;B4DGP5;A0A024RBH0;Q00537;B7Z461;Q6ZMU4;E5RGN0;Q96GA5;Q9BRL4;A0A087WZU2;A0A140VK97;A0A024R183;Q59FJ5;B7Z8T0;Q00536;D6RA44;A0A0A0MSJ6;B4DHU6;B4DER5;Q59G02;A0A024R996;B4DK03;A0A024R980;Q07002	F5H6Z0	172	184	CDK17;PCTK2;CDK16;PCTK1;CDK18;PCTK3	Cyclin-dependent kinase 17;Cyclin-dependent kinase 16;Cyclin-dependent kinase 18	yes	2;3	2.7751e-05	77.379	2	0
LEQVLSSMK	9	0	1033.55	A0A087WZN1;O43837;A0A087X2E5;L0R875;B4DU38;Q99855	A0A087WZN1	97	105	IDH3B	Isocitrate dehydrogenase [NAD] subunit, mitochondrial;Isocitrate dehydrogenase [NAD] subunit beta, mitochondrial	yes	2	0.00035545	101.43	1	0
LFADAVQELLPQYK	14	0	1633.87	B2RBA6;A0A0S2Z4A5;P33993;A0A0S2Z441	B2RBA6	76	89	MCM7	DNA helicase;DNA replication licensing factor MCM7	yes	2	0.0003143	70.908	1	77062000
LFDHPESPTPNPTEPLFLAQAEVYK	25	0	2839.41	A0A0U1RQF0;P49327	A0A0U1RQF0	968	992	FASN	Fatty acid synthase;[Acyl-carrier-protein] S-acetyltransferase;[Acyl-carrier-protein] S-malonyltransferase;3-oxoacyl-[acyl-carrier-protein] synthase;3-oxoacyl-[acyl-carrier-protein] reductase;3-hydroxyacyl-[acyl-carrier-protein] dehydratase;Enoyl-[acyl-carrier-protein] reductase;Oleoyl-[acyl-carrier-protein] hydrolase	yes	3	1.9463e-05	56.131	1	92292000
LFEQNVQR	8	0	1032.54	A0A024R4T4;P61081;M0QX69	A0A024R4T4	159	166	UBE2M	NEDD8-conjugating enzyme Ubc12	yes	2	0.015732	107.66	1	393960000
LFFWMQEPK	9	0	1224.6	Q16186;B4DMP7	Q16186	105	113	ADRM1	Proteasomal ubiquitin receptor ADRM1	yes	2	0.011162	82.241	1	65117000
LFLFHTSLPIAEAPGK	16	0	1739.96	B4DSN3;G5EA31;A0A024QZM6;P53992	B4DSN3	520	535	SEC24C	Protein transport protein Sec24C	yes	3	1.0993e-07	84.759	1	49163000
LFQECCPHSTDR	12	0	1434.6	B4DUQ1;A0A024R228;P61978;B4DFF1;Q5EC54;Q5T6W2	B4DUQ1	156	167	HNRPK;HNRNPK	Heterogeneous nuclear ribonucleoprotein K	yes	2;3	0.0026506	53.967	2	0
LFSQDECAK	9	0	1039.46	Q6P6C2	Q6P6C2	94	102	ALKBH5	RNA demethylase ALKBH5	yes	2	0.00741	67.169	1	0
LFTTMELMR	9	0	1140.57	A0A0S2Z489;O00232	A0A0S2Z489	308	316	PSMD12	26S proteasome non-ATPase regulatory subunit 12	yes	2	0.0036413	121.62	1	165430000
LFVGNLPADITEDEFK	16	0	1806.9	Q9BSV4;Q86VG2;P23246;Q6PIX2	Q9BSV4	226	241	SFPQ	Splicing factor, proline- and glutamine-rich	yes	2	0.042348	42.041	1	27572000
LFVGNLPADITEDEFKR	17	1	1963.01	Q9BSV4;Q86VG2;P23246;Q6PIX2	Q9BSV4	226	242	SFPQ	Splicing factor, proline- and glutamine-rich	yes	2;3	6.2808e-16	141.82	2	187260000
LFVGNLPPDITEEEMR	16	0	1858.91	A8K525;A0A0S2Z4Z9;Q15233;C9JYS8;C9IZL7;C9J4X2;A0A0S2Z4E7	A8K525	76	91	NONO	Non-POU domain-containing octamer-binding protein	yes	2	1.7513e-07	88.187	1	64255000
LFYADHPFIFLVR	13	0	1636.88	A0A024R5K8;P50454;B4DN87;A8K259;E9PKH2;H0YEP8	A0A024R5K8	381	393	SERPINH1	Serpin H1	yes	3	0.0013609	57.175	1	42248000
LGANSLLDLVVFGR	14	0	1472.84	B3KT34;A0A024QZ30;P31040;A0A087X1I3;Q0QF12;D6RFM5;B4DYN5;H0Y8X1	B3KT34	227	240	SDHA	Succinate dehydrogenase [ubiquinone] flavoprotein subunit, mitochondrial	yes	2	8.2574e-06	92.866	1	79533000
LGDTQQSIPGNEER	14	0	1542.73	P19474;H0YDP8	P19474	311	324	TRIM21	E3 ubiquitin-protein ligase TRIM21	yes	2	2.5247e-05	83.862	1	399900000
LGEGTYATVYK	11	0	1200.6	F5H6Z0;B4DGP5;A0A024RBH0;Q00537;B7Z461;Q6ZMU4;E5RGN0;Q96GA5;Q9BRL4;A0A087WZU2;A0A140VK97;A0A024R183;Q59FJ5;B7Z8T0;Q00536;H0YBX5;E5RJM2	F5H6Z0	145	155	CDK17;PCTK2;CDK16;PCTK1	Cyclin-dependent kinase 17;Cyclin-dependent kinase 16	yes	2	0.014824	56.563	1	66637000
LGELPSWILMR	11	0	1313.72	C9JJT5;C9JU26;G3V325;B4DJ38;P56134	C9JJT5	17	27	ATP5J2-PTCD1;ATP5J2	ATP synthase subunit f, mitochondrial	yes	2	0.0013345	120.15	1	68499000
LGFAGLVQEISFGTTK	16	0	1666.89	E7ENZ3;B4DYC8;B7ZAR1;B4DDU6;B4DZT5;B4DXI1;E9PCA1;B4DX08;Q9BU08;V9HW37;P48643;B4DZY9;Q96GI1;B4DE30	E7ENZ3	298	313	CCT5;HEL-S-69	T-complex protein 1 subunit epsilon	yes	2	2.9921e-06	72.089	1	19376000
LGGTCVNVGCVPK	13	0	1245.62	V9HW90;P00390;A0A2R8YF59;H0YC68	V9HW90	98	110	HEL-75;GSR	Glutathione reductase, mitochondrial	yes	2	0.01169	44.98	1	0
LGIKPESVQPHRPTTNPNTSK	21	2	2300.22	F8VQR7;A0A024RBB5;Q16527	F8VQR7	88	108	CSRP2	Cysteine and glycine-rich protein 2	yes	4	0.021623	29.84	1	65416000
LGLDFPNLPYLIDGTHK	17	0	1912.01	Q9UE37;E9PLF1;E9PHN7;A8HT81;E9PHN6;Q0D2I8;F6XZQ7;P28161	Q9UE37	15	31	GSTmu3;GSTM2	Glutathione S-transferase Mu 2	yes	3	0.024838	32.091	1	18692000
LGLVPVSEASIIIAVSSAHR	20	0	2018.15	A0A024QZS1;O96007	A0A024QZS1	125	144	MOCS2	Molybdopterin synthase catalytic subunit	yes	3	9.4815e-05	58.49	1	40314000
LGMPMCLR	8	0	919.444	Q9BYB4	Q9BYB4	162	169	GNB1L	Guanine nucleotide-binding protein subunit beta-like protein 1	yes	2	0.0049055	92.191	1	0
LGYILTCPSNLGTGLR	16	0	1676.89	B3KVA7;B2R8A3;A0A024RAK5;P12532;P17540	B3KVA7	248	263	CKMT2;CKMT1A	Creatine kinase U-type, mitochondrial;Creatine kinase S-type, mitochondrial	yes	2	0.00042828	59.731	1	0
LHEADIVVLGSPKPEEIPLTWIQPGTTVLNCSHDFLSGK	39	1	4240.19	B2RD24;A0A087WVM4;B7ZM99;Q6UB35;H0Y327	B2RD24	16	54	MTHFD1L	Monofunctional C1-tetrahydrofolate synthase, mitochondrial	yes	4;5	8.3538e-05	49.148	2	0
LHKNDIAINELMK	13	1	1537.83	P51665;B2RD27;H3BNT7;H3BTM8;B4DXI8	P51665	101	113	PSMD7	26S proteasome non-ATPase regulatory subunit 7	yes	3	0.0016348	57.106	1	75693000
LHLFCEK	7	0	888.453	P19474	P19474	99	105	TRIM21	E3 ubiquitin-protein ligase TRIM21	yes	2	0.041451	49.058	1	0
LHLSGIDANPNALFPPVEFPAPR	23	0	2471.3	A0A0U1RQF0;P49327	A0A0U1RQF0	803	825	FASN	Fatty acid synthase;[Acyl-carrier-protein] S-acetyltransferase;[Acyl-carrier-protein] S-malonyltransferase;3-oxoacyl-[acyl-carrier-protein] synthase;3-oxoacyl-[acyl-carrier-protein] reductase;3-hydroxyacyl-[acyl-carrier-protein] dehydratase;Enoyl-[acyl-carrier-protein] reductase;Oleoyl-[acyl-carrier-protein] hydrolase	yes	3	9.6992e-14	89.663	1	97546000
LHLSLNDAYDLVK	13	0	1499.8	Q6P9C2;B2RAL9;Q99956;Q8N4A4;P78512	Q6P9C2	309	321	DUSP9	Dual specificity protein phosphatase;Dual specificity protein phosphatase 9	yes	2	0.00019376	113.44	1	80321000
LHQLAMQQSHFPMTHGNTGFSGIESSSPEVK	31	0	3381.59	B4DRD7;H3BRU6;F8VZX2;Q15366;F8VRH0	B4DRD7	163	193	PCBP2	Poly(rC)-binding protein 2	yes	4;5	3.4485e-06	54.324	2	204520000
LIALLEVLSQK	11	0	1225.76	F8WE98;A6NDY9;A0A087WWY3;Q60FE6;Q60FE5;A0A024R321;O75369;P21333;Q14315	F8WE98	63	73	FLNA;FLNB;FLNC	Filamin-B;Filamin-A;Filamin-C	yes	2	0.0051734	65.347	1	20007000
LIANNTTVER	10	0	1129.61	D3DNS0;Q6FI97;Q53FS0;O96019	D3DNS0	177	186	ACTL6A;BAF53A	Actin-like protein 6A	yes	2	0.0070923	78.149	1	33249000
LICAMMTRR	9	1	1093.56	D3DW38;H7C1F9;Q2PPJ7	D3DW38	160	168	hCG_22457;RALGAPA2	Ral GTPase-activating protein subunit alpha-2	yes	2	0.027037	43.124	1	310730000
LIDWGLAEFYHPAQEYNVR	19	0	2320.13	H3BSA1;P19784	H3BSA1	54	72	CSNK2A2	Casein kinase II subunit alpha	yes	3	0.0025077	47.204	1	39369000
LIFSTITSK	9	0	1008.59	A8K2M0;P43686	A8K2M0	343	351	PSMC4	26S protease regulatory subunit 6B	yes	2	0.020374	71.342	1	323370000
LINANMMVLGHEPR	14	0	1593.81	A0A140VKF2;O00487;Q53TH1;Q59G89	A0A140VKF2	162	175	PSMD14	26S proteasome non-ATPase regulatory subunit 14	yes	2;3	2.0524e-06	94.023	2	203590000
LIQLMEEIMAEK	12	0	1446.75	A0A1X7SBZ2;A0A1W2PQ51;Q59F66;Q92841;B4DZQ7	A0A1X7SBZ2	406	417	DDX17	Probable ATP-dependent RNA helicase DDX17	yes	2	0.00028367	85.377	1	23340000
LIQLMEEIMAEKENK	15	1	1817.93	A0A1X7SBZ2;A0A1W2PQ51;Q59F66;Q92841;B4DZQ7	A0A1X7SBZ2	406	420	DDX17	Probable ATP-dependent RNA helicase DDX17	yes	2;3	6.4809e-07	109.24	2	316400000
LISQIVSSITASLR	14	0	1486.87	B3KT06;B3KPS3;P68363;A8JZY9;P68366;B4DDU2;F8VVB9;C9JDS9;Q9H853;Q53GA7;F5H5D3;Q9BQE3;B7Z1K5	B3KT06	195	208	TUBA1B;TUBA4A;TUBA4B;TUBA1C	Tubulin alpha-1B chain;Tubulin alpha-4A chain;Putative tubulin-like protein alpha-4B;Tubulin alpha-1C chain	no	2	1.2779e-07	153.95	1	196870000
LITEDVQGK	9	0	1001.54	D6RGE0;D6RED7;D6RAS7;B7Z3M5;H0Y8L7;D6RB09;E9PFI5;D6RG13;D6RAT0;Q6NXR8;A8K4W0;P61247	D6RGE0	49	57	RPS3A	40S ribosomal protein S3a	yes	2	0.030934	62.464	1	51479000
LIVGTAGR	8	0	785.476	J3QT28;A0A140VJF3;O43684;B4DDM6	J3QT28	150	157	BUB3	Mitotic checkpoint protein BUB3	yes	2	1.6669e-05	162.07	1	30592000
LIVNVNDLR	9	0	1054.61	Q53HJ4;B2R7C5;A0A0S2Z4T1;P25205;Q8NHX6;A0A0S2Z492	Q53HJ4	47	55	MCM3;HCC5	DNA helicase;DNA replication licensing factor MCM3	yes	2	0.0010572	116.73	1	0
LKEIYENMAPGENKR	15	2	1790.9	Q59EG8;Q13200;B4DM22;Q9NSM5;H7C2Q3;C9JPC0	Q59EG8	111	125	PSMD2;DKFZp564A2282	26S proteasome non-ATPase regulatory subunit 2	yes	3;4	4.8841e-05	70.197	2	814560000
LKPGDLVGVNK	11	1	1138.67	R4GNH3;A0A140VK42;P17980;E9PM69;A8K781;E9PKD5;E9PMD8;E9PLG2	R4GNH3	129	139	PSMC3	26S protease regulatory subunit 6A	yes	2	0.0096336	74.941	1	70704000
LLDAVDTYIPVPAR	14	0	1541.85	P49411	P49411	239	252	TUFM	Elongation factor Tu, mitochondrial	yes	2	0.00011114	116.23	1	764550000
LLDSEIK	7	0	816.459	R4GNH3;A0A140VK42;P17980;E9PM69;A8K781;E9PKD5;E9PMD8;E9PN50;E9PLG2	R4GNH3	31	37	PSMC3	26S protease regulatory subunit 6A	yes	2	0.028323	92.467	1	154370000
LLDVVHPAAK	10	0	1061.62	F8WAM2;Q6IBT3;Q53HV2;Q99832	F8WAM2	24	33	CCT7	T-complex protein 1 subunit eta	yes	2	0.0038698	85.161	1	89182000
LLEPVLLLGK	10	0	1093.71	M0QX76;M0R1M5;M0R3H0;M0R210;Q6IPX4;P62249	M0QX76	1	10	RPS16	40S ribosomal protein S16	yes	2	0.0016671	105.57	1	69123000
LLEQYKEESK	10	1	1265.65	Q7Z4Q5;A0A1W2PQL0;A0A1W2PP34;A0A1W2PPL4;A0A1W2PPH7;Q5RI18;Q96BA7;A0A1W2PP35;A0A1X7SBS1;B3KX72;B4DLR3;A0A1W2PPS1;Q00839;A0A1W2PQD4	Q7Z4Q5	353	362	HNRPU;HNRNPU	Heterogeneous nuclear ribonucleoprotein U	yes	2	0.0069663	119.21	1	21641000
LLETTDRPDGHQNNLR	16	1	1877.93	B7Z5M1;J3KTM9;B2RBR9;Q14974	B7Z5M1	294	309	KPNB1	Importin subunit beta-1	yes	3	6.1762e-07	118.51	1	53142000
LLEVEHPAAK	10	0	1105.61	P17987;F5H136;E7ERF2;F5H726;F5GZI8;F5H676	P17987	64	73	TCP1	T-complex protein 1 subunit alpha	yes	2	0.0024802	93.267	1	145170000
LLEVYDQLFK	10	0	1266.69	E9PF10;A0A024R071;O75694;B4DLT2;B3KMK3	E9PF10	1235	1244	NUP155	Nuclear pore complex protein Nup155	yes	2	0.011952	78.516	1	0
LLGQFTLIGIPPAPR	15	0	1591.94	B7Z4V2;V9HW84;P38646;Q8N1C8;B7Z4T3;A1XP52;H0Y8S0	B7Z4V2	485	499	HEL-S-124m;HSPA9	Stress-70 protein, mitochondrial	yes	2	1.1233e-06	110.54	1	156910000
LLHVAVSDVNDDVRR	15	1	1706.91	Q99460;B2R6D0;A0A087WW66;Q05CW6;Q05BX4;H7C378	Q99460	602	616	PSMD1	26S proteasome non-ATPase regulatory subunit 1	yes	2;3	1.5326e-05	74.769	2	147740000
LLIHQSLAGGIIGVK	15	0	1517.93	B4DUQ1;A0A024R228;P61978;B4DFF1;Q5EC54;Q5T6W2	B4DUQ1	125	139	HNRPK;HNRNPK	Heterogeneous nuclear ribonucleoprotein K	yes	2;3	2.9927e-08	151.79	2	189720000
LLLPWLEAR	9	0	1109.66	A0A087WVQ6;Q00610	A0A087WVQ6	861	869	CLTC	Clathrin heavy chain;Clathrin heavy chain 1	yes	2	0.0050937	109.01	1	22786000
LLLQVQHASK	10	0	1135.67	A8K787;A0A0S2Z3H3;P12235;A0A0S2Z359;V9GYG0;Q6NVC0;P05141;Q6I9V5;P12236;Q59EI9	Q6NVC0	59	68	SLC25A4;SLC25A5;SLC25A6	ADP/ATP translocase 1;ADP/ATP translocase 2;ADP/ATP translocase 2, N-terminally processed;ADP/ATP translocase 3;ADP/ATP translocase 3, N-terminally processed	no	2;3	0.0010484	82.029	2	2857000000
LLNNAFEELVAFQR	14	0	1662.87	Q53HJ4;B2R7C5;A0A0S2Z4T1;P25205;Q8NHX6;B4DUQ9;J3KQ69;A0A0S2Z492	Q53HJ4	65	78	MCM3;HCC5	DNA helicase;DNA replication licensing factor MCM3	yes	2;3	9.1683e-09	156.48	2	368880000
LLPGQSDLLVAHNTWNNYQHMLR	23	0	2719.37	Q8NHP8	Q8NHP8	250	272	PLBD2	Putative phospholipase B-like 2;Putative phospholipase B-like 2 32 kDa form;Putative phospholipase B-like 2 45 kDa form	yes	3	0.021438	29.476	1	31184000
LLQDFFNGR	9	0	1108.57	A8K5I0;A0A0G2JIW1;P0DMV9;P0DMV8;A0A1U9X7W4;B4DNT8;Q59EJ3;B4DWK5;B4DI39;B4E1S9;B4DFN9;B4E388;B4DVU9;V9GZ37;B3KTT5;B4DNX1;B4E1T6	A8K5I0	349	357	HEL-S-103;HSPA1B;HSPA1A	Heat shock 70 kDa protein 1B;Heat shock 70 kDa protein 1A	yes	2	1.6936e-05	157.52	1	234030000
LLQDHPWLLSQNLVVKPDQLIK	22	1	2596.47	A0A024R1Y2;A0A024R1T9;Q4LE36;P53396;K7ESG8	A0A024R1Y2	43	64	ACLY;ACLY variant protein	ATP-citrate synthase	yes	3	0.00010271	54.223	1	80913000
LLREELQLLQEQGSYVGEVVR	21	1	2457.32	A0A140VJS3;P62195;Q59GS3;J3KRP2;J3QSA9;J3QQM1;J3QLH6;J3QSE0	A0A140VJS3	58	78	PSMC5	26S protease regulatory subunit 8	yes	2;3	4.7034e-25	172.99	2	1859300000
LLSEGADVNAK	11	0	1115.58	A0A2U3TZY2;A0A140VK11;H0YGM0;Q9H078;F5H392;A0A2R8Y6R5	A0A2U3TZY2	153	163	CLPB	Caseinolytic peptidase B protein homolog	no	2	0.00039325	95.502	1	85900000
LLSNDEVTIK	10	0	1130.62	C9JTY3;C9JUE0;C9JJP5;Q7Z427;Q05BK6;Q7Z426;Q8TDJ5;Q92734	C9JTY3	48	57	TFG;TFG/ALK fusion	Tyrosine-protein kinase receptor;Protein TFG	yes	2	0.0029376	88.948	1	27335000
LLSQQLNMTSLHNSFYSKDTSLR	23	1	2682.34	Q6EHZ0;Q9H2N1;Q6ZP91	Q6EHZ0	54	76	STRF6		yes	3	0.027725	20.256	3	328600000
LLSRPQDALEGVVLSPSLEAR	21	1	2249.24	H0Y2W2;Q9NVI7	H0Y2W2	293	313	ATAD3A	ATPase family AAA domain-containing protein 3A	yes	3	1.887e-10	88.036	1	53916000
LLTDDGNKWLYK	12	1	1464.76	Q59EG8;Q13200;B4DM22;Q9NSM5;Q13041	Q59EG8	395	406	PSMD2;DKFZp564A2282	26S proteasome non-ATPase regulatory subunit 2	yes	2	0.012902	63.816	1	41985000
LLTGELLPTDGMIR	14	0	1527.83	A0A090N7X1;A0A090N7Y2;Q9UG63	A0A090N7X1	442	455	ABCF2	ATP-binding cassette sub-family F member 2	yes	2	0.00061911	64.297	1	32534000
LLTSFLPAQLLR	12	0	1370.83	H0YFX4;A0A024R599;B4E2Z3;F5GZS6;J3KPF3;P08195	H0YFX4	67	78	SLC3A2	4F2 cell-surface antigen heavy chain	yes	2	0.01349	53.327	1	19012000
LLVSQGASIYIENK	14	0	1533.84	B1AJY5;O75832;B1AJY7	O75832	190	203	PSMD10	26S proteasome non-ATPase regulatory subunit 10	no	2;3	1.9424e-08	103.22	35	13265000000
LLVSQGASIYIENKEEK	17	1	1920.02	B1AJY5;O75832;B1AJY7	O75832	190	206	PSMD10	26S proteasome non-ATPase regulatory subunit 10	no	2;3	8.2799e-09	138.94	26	76227000000
LLVSQGASIYIENKEEKTPLQVAK	24	2	2657.46	B1AJY5;O75832;B1AJY7	O75832	190	213	PSMD10	26S proteasome non-ATPase regulatory subunit 10	no	2;3;4	5.19e-15	102.8	31	6469500000
LLVVYPWTQR	10	0	1273.72	Q9UM85;Q3L3Q5;D5FZW3;A0A2S1CVU8;E9M263;Q9BXA2;Q9UBV6;Q14484;A9YUX2;A0A2R3Z0D6;A8MUF7;B5ANL9;Q9UP81;F8W6P5;Q4TZM4;Q14477;Q14476;E9PEW8;Q9BWU5;Q8IZI0;Q8IUL9;Q6V0K9;Q6J1Z7;Q670S4;Q52MT0;Q4F786;Q3LR79;Q0Z944;E9NGZ5;D1MGQ0;B7UCU6;B3VL31;B3VL05;B2M1S8;Q9BWV6;A0A2R8Y7R2;Q9GZL9;Q14474;Q9UK54;Q9UNL6;B3VL86;E9PFT6;E7CYP2;D9YZU9;D9YZU8;D9YZU7;D9YZU5;D3GKD9;D3GKD8;C8C504;A0N071;Q14403;A0A2R8Y7X9;Q14473;P6989…	Q9UM85	1	10	beta-globin;HBB;HBE1;HBD;HBG2;HBG1	Hemoglobin subunit gamma-2;Hemoglobin subunit gamma-1;Hemoglobin subunit beta;LVV-hemorphin-7;Spinorphin;Hemoglobin subunit epsilon;Hemoglobin subunit delta	yes	2	2.2731e-06	164.53	1	49442000
LMALLGQALK	10	0	1056.64	A0MNN4;Q2TAY7	A0MNN4	161	170	SMU1	WD40 repeat-containing protein SMU1;WD40 repeat-containing protein SMU1, N-terminally processed	yes	2	0.0024567	93.561	1	56072000
LMDVCATSR	9	0	994.458	F8VYH9;F8VTV8;F8VWX7;A0A024RBB6;P11802;Q96BE9;F8W1L8	F8VYH9	74	82	CDK4	Cyclin-dependent kinase 4	yes	2	0.001455	110.12	1	0
LMEPIYLVEIQCPEQVVGGIYGVLNR	26	0	2931.52	P13639;Q8TA90;B4DPU3	P13639	740	765	EEF2	Elongation factor 2	yes	2;4	1.7306e-15	90.725	3	0
LMQLVDHR	8	0	1010.53	A0A1X7SBZ2;A0A1W2PQ51;Q59F66;Q92841	A0A1X7SBZ2	548	555	DDX17	Probable ATP-dependent RNA helicase DDX17	yes	2	0.00083173	143.85	1	670620000
LMSSNSTDLPLNIECFMNDKDVSGK	25	1	2757.27	A0A024RDQ0;A0A024RDS1;Q92598;B4DY72;B4DF68;A0A0A0MSM0;B4DZB4	A0A024RDQ0	276	300	HSPH1	Heat shock protein 105 kDa	yes	3	2.0687e-05	56.95	1	0
LMTGDTYTAHAGAK	14	0	1435.68	Q13914;C0LYZ4;F1JU33;K4LBP8;K4L955;A0A023PX70;Q59F19;A0A024R8E2;Q59FK4;A9UEZ6;A9UF02;A9UF07;P00519;P42684	Q13914	25	38	ABL1;BCR/ABL fusion;ABL2	Non-specific protein-tyrosine kinase;Tyrosine-protein kinase ABL1;Abelson tyrosine-protein kinase 2	yes	3	0.029608	31.389	1	12148000
LNCQVIGASVDSHFCHLAWVNTPK	24	0	2638.28	Q06830;A0A0A0MSI0;B2R4P2	Q06830	69	92	PRDX1	Peroxiredoxin-1	yes	4	2.4425e-07	63.979	1	0
LNFSHGTHEYHAETIK	16	0	1882.9	H3BTN5;V9HWB8;A0A024R5Z9;P14618;H3BT25;H3BUW1;H3BTJ2;H3BQ34;A0A024R609;B4DRT3	H3BTN5	74	89	PKM;HEL-S-30;PKM2	Pyruvate kinase;Pyruvate kinase PKM	yes	2	0.00013859	63.662	1	58903000
LNHYVLYK	8	0	1048.57	Q6IBN0;O43242;B3KNN7;Q96N86;B4DV84;B4DEB0;B4DPM7;Q8N9M2	Q6IBN0	108	115	PSMD3	26S proteasome non-ATPase regulatory subunit 3	yes	2	0.015549	94.262	1	118660000
LNIGDLQVTK	10	0	1099.62	A0A024R201;J3KNQ3;Q53GN6;Q9Y6E3;Q9UNM6;B2RBM7;A0A087WUL9;B4DJ66;E9PL38;H0YD73	A0A024R201	123	132	PSMD13	26S proteasome non-ATPase regulatory subunit 13	yes	2	0.0030744	88.392	1	41175000
LNIPVSQVNPR	11	0	1235.7	B7Z1N5;B3KNQ8;B3KSY7;B3KV59;B7Z1Q9;M0R116;B7Z3F8;A0A2R8YEY8;Q53ES0;B7Z3V1;B7Z9V4;A0A0A0MT26;P13637;P05023	B7Z1N5	58	68	ATP1A3;ATP1A1	Sodium/potassium-transporting ATPase subunit alpha-3;Sodium/potassium-transporting ATPase subunit alpha-1	yes	2	0.00064941	90.761	1	75482000
LNLAFVANLFNK	12	0	1362.77	B4DPW9;Q53GY0;P13797;A0A0A0MSQ0;Q96HI1;B4DG31;H7C4N2	B4DPW9	338	349	PLS3	Plastin-3	yes	2	0.00013216	99.802	1	68099000
LNQPPEDGISSVK	13	0	1382.7	J3QT28;A0A140VJF3;O43684;J3QSX4	J3QT28	9	21	BUB3	Mitotic checkpoint protein BUB3	yes	2	6.9898e-05	80.916	1	140550000
LNSLMSLVNK	10	0	1117.62	A0A0S2Z489;O00232	A0A0S2Z489	432	441	PSMD12	26S proteasome non-ATPase regulatory subunit 12	yes	2	0.022797	57.859	1	51092000
LNSVQSSERPLFLVHPIEGSTTVFHSLASR	30	1	3307.73	A0A0U1RQF0;P49327	A0A0U1RQF0	2232	2261	FASN	Fatty acid synthase;[Acyl-carrier-protein] S-acetyltransferase;[Acyl-carrier-protein] S-malonyltransferase;3-oxoacyl-[acyl-carrier-protein] synthase;3-oxoacyl-[acyl-carrier-protein] reductase;3-hydroxyacyl-[acyl-carrier-protein] dehydratase;Enoyl-[acyl-carrier-protein] reductase;Oleoyl-[acyl-carrier-protein] hydrolase	yes	4	5.1596e-07	62.398	1	149090000
LPDGLTR	7	0	770.429	B1AHB0;P33992;Q53FG5;A8K521;B1AHB1;B4DQ39;B3KVF0;B4DVK5;Q59F49	B1AHB0	365	371	MCM5	DNA helicase;DNA replication licensing factor MCM5	yes	2	0.010914	138.85	1	50050000
LPDGTSLTQTFR	12	0	1334.68	E9PRQ7;A0A024R598;Q04323;B4E0P8;A0A087WTZ5;E9PJ81;A0A024R539	E9PRQ7	216	227	UBXN1;LOC51035	UBX domain-containing protein 1	yes	2	0.00030436	82.008	1	31277000
LPECAK	6	0	659.331	A0A0S2Z489;O00232;J3KTJ5;J3KSK1;A0A0S2Z476	A0A0S2Z489	28	33	PSMD12	26S proteasome non-ATPase regulatory subunit 12	yes	2	0.033044	57.453	1	0
LPEDPLLSGLLDSPALK	17	0	1776.99	A0A0U1RQF0;P49327;Q6PJJ3	A0A0U1RQF0	1209	1225	FASN	Fatty acid synthase;[Acyl-carrier-protein] S-acetyltransferase;[Acyl-carrier-protein] S-malonyltransferase;3-oxoacyl-[acyl-carrier-protein] synthase;3-oxoacyl-[acyl-carrier-protein] reductase;3-hydroxyacyl-[acyl-carrier-protein] dehydratase;Enoyl-[acyl-carrier-protein] reductase;Oleoyl-[acyl-carrier-protein] hydrolase	yes	2	2.3956e-07	83.617	1	75404000
LPLQDVYK	8	0	974.544	Q6IPT9;Q6IPS9;Q6IPN6;Q53HR5;Q53HQ7;Q53HM9;Q5VTE0;P68104;Q96RE1;A0A087WVQ9;A8K9C4;Q53GA1;Q53GE9;Q53G85;Q8IUB0;B4DNE0;B4DV42;Q504Z0;Q53HR1;Q9NZS6;A0A087WV01;Q9H2I7;Q96C29;Q8TBL1;Q6P082;Q96CD8;Q6P4C9;B4E2C5;A9X7H1;A0A2U3TZH3;Q05639;Q59GP5	Q6IPT9	248	255	EEF1A1;EEF1A1P5;EEF1A1L14;EEF1A2	Elongation factor 1-alpha;Putative elongation factor 1-alpha-like 3;Elongation factor 1-alpha 1;Elongation factor 1-alpha 2	yes	2	0.016871	98.997	1	167640000
LPLVTPHTQCR	11	0	1263.68	Q53XL8;Q53HB3;P62191	Q53XL8	49	59	PSMC1	26S protease regulatory subunit 4	yes	2;3	9.2228e-05	120.15	2	0
LQAQQDAVNIVCHSK	15	0	1652.83	Q5VWC4;P55036;A6PVX3	Q5VWC4	26	40	PSMD4	26S proteasome non-ATPase regulatory subunit 4	yes	2;3	4.9122e-07	106.49	2	0
LQCLGLQSR	9	0	1016.54	A0A024R5N4;F5H0C4;Q9BRP4;F5H0F7	A0A024R5N4	246	254	WDR71;PAAF1	Proteasomal ATPase-associated factor 1	yes	2	4.7675e-09	176.75	1	0
LQCLNESR	8	0	961.465	Q9GZP4	Q9GZP4	40	47	PITHD1	PITH domain-containing protein 1	yes	2	0.00055535	138.83	1	0
LQDPFSLYR	9	0	1137.58	P21912	P21912	234	242	SDHB	Succinate dehydrogenase [ubiquinone] iron-sulfur subunit, mitochondrial	yes	2	0.006367	98.629	1	29719000
LQLHESQKDYK	11	1	1387.71	Q53HG7;Q14247;Q76MU0	Q53HG7	256	266	CTTN;EMS1	Src substrate cortactin	yes	2	0.038023	38.754	1	55725000
LQNTGVADGYPVR	13	0	1388.7	Q4W5A6;Q7L8P5;H0YA05;B2RTX2;Q8WX93	Q4W5A6	13	25	KIAA0992;DKFZp586L0518;PALLD	Palladin	yes	2	5.0077e-06	80.763	1	0
LQPFATEADVEEALR	15	0	1687.84	B1AHB0;P33992;Q53FG5;A8K521;B1AHB1;Q59F49	B1AHB0	628	642	MCM5	DNA helicase;DNA replication licensing factor MCM5	yes	2	1.7927e-06	100.93	1	246380000
LQPLSPVPSDIEISR	15	0	1649.9	B2RD24;A0A087WVM4;B7ZM99;Q6UB35;H0Y327	B2RD24	108	122	MTHFD1L	Monofunctional C1-tetrahydrofolate synthase, mitochondrial	yes	2	7.943e-05	71.176	1	47898000
LQQELEFLEVQEEYIKDEQK	20	1	2537.25	A8K2M0;P43686	A8K2M0	47	66	PSMC4	26S protease regulatory subunit 6B	yes	3	0.0044055	43.696	1	509520000
LQTSSVLVSGLR	12	0	1258.72	A0A024R1A3;P22314;Q5JRS1;Q5JRS3;Q5JRS2;Q5JRR9;Q5JRS0	A0A024R1A3	70	81	UBE1;UBA1	Ubiquitin-like modifier-activating enzyme 1	yes	2	0.00029939	107.24	1	18336000
LQVALGELRR	10	1	1153.69	P19474	P19474	139	148	TRIM21	E3 ubiquitin-protein ligase TRIM21	yes	2	0.0041569	103.83	1	26698000
LQVVDQPLPVR	11	0	1262.73	A0A0U1RQF0;P49327	A0A0U1RQF0	374	384	FASN	Fatty acid synthase;[Acyl-carrier-protein] S-acetyltransferase;[Acyl-carrier-protein] S-malonyltransferase;3-oxoacyl-[acyl-carrier-protein] synthase;3-oxoacyl-[acyl-carrier-protein] reductase;3-hydroxyacyl-[acyl-carrier-protein] dehydratase;Enoyl-[acyl-carrier-protein] reductase;Oleoyl-[acyl-carrier-protein] hydrolase	yes	2	7.6927e-05	148.05	1	68613000
LREDENAEPVGTTYQK	16	1	1848.89	D6R9W4;B3KSQ7;A0A2Z6ATB6;Q16643	D6R9W4	149	164	DBN1	Drebrin	yes	2	0.0027503	62.088	1	36481000
LREVVETPLLHPER	14	1	1686.94	A0A140VK70;P35998;A0A1W2PQS1;Q75L23	A0A140VK70	187	200	PSMC2	26S protease regulatory subunit 7	yes	2;3	1.2404e-05	109.84	2	231090000
LRQENMELAER	11	1	1387.69	P40222	P40222	298	308	TXLNA	Alpha-taxilin	yes	2	0.0013207	98.156	1	37025000
LRSDCESQECVTK	13	1	1496.66	B4DWZ7;B3KTN5;Q9NS86	B4DWZ7	147	159	LANCL2	LanC-like protein 2	yes	2	6.3006e-06	94.767	1	0
LSDGFNGADLR	11	0	1163.56	A0A087X2I1;P62333;V9HW24;H0YJC0	A0A087X2I1	348	358	PSMC6;HEL-S-73	26S protease regulatory subunit 10B	yes	2	8.6985e-05	147.2	1	107020000
LSDGVAVLK	9	0	900.528	A0A024R3X4;P10809;B3GQS7;B7Z5E7;B7Z4F6;B7Z597	A0A024R3X4	397	405	HSPD1	60 kDa heat shock protein, mitochondrial	yes	2	0.016134	75.213	1	113440000
LSDYLFTLAR	10	0	1197.64	B4DHP4;S4R3P5;B2R6J3;Q96EY8	B4DHP4	125	134	MMAB	Cob(I)yrinic acid a,c-diamide adenosyltransferase, mitochondrial	yes	2	0.019687	59.931	1	45121000
LSEDYGVLK	9	0	1022.53	B4DF70;V9HW12;P32119;A6NIW5	B4DF70	111	119	HEL-S-2a;PRDX2	Peroxiredoxin-2	yes	2	0.015558	75.738	1	85576000
LSEHATAPTR	10	0	1081.55	H0YMM5;H0YNJ9;H0YNW5;H0YKC5;H0YKI0;P33316;A0A0C4DGL3	H0YMM5	34	43	DUT	Deoxyuridine 5-triphosphate nucleotidohydrolase, mitochondrial	yes	2	0.012237	76.827	1	56399000
LSPDAIPGK	9	0	896.497	A0A0U1RQF0;P49327;Q6PJJ3	A0A0U1RQF0	1581	1589	FASN	Fatty acid synthase;[Acyl-carrier-protein] S-acetyltransferase;[Acyl-carrier-protein] S-malonyltransferase;3-oxoacyl-[acyl-carrier-protein] synthase;3-oxoacyl-[acyl-carrier-protein] reductase;3-hydroxyacyl-[acyl-carrier-protein] dehydratase;Enoyl-[acyl-carrier-protein] reductase;Oleoyl-[acyl-carrier-protein] hydrolase	yes	2	0.018273	73.26	1	21856000
LSPEELLLR	9	0	1068.62	B4DPW9;Q53GY0;P13797;A0A0A0MSQ0;Q96HI1;Q59GX5;V9HWJ7;Q53FI1;A0A024RDT4;P13796;C9JAM8;Q14651	B4DPW9	240	248	PLS3;HEL-S-37;LCP1;PLS1	Plastin-3;Plastin-2;Plastin-1	yes	2	0.005564	106.36	1	111980000
LSQMILDKK	9	1	1074.61	O00231	O00231	365	373	PSMD11	26S proteasome non-ATPase regulatory subunit 11	yes	3	0.0057135	79.148	1	25101000
LSSEMNTSTVNSAR	14	0	1495.69	A0A0D9SFE5;Q6DC98;B4DZT3;E9PBF6;P20700	A0A0D9SFE5	277	290	LMNB1	Lamin-B1	yes	2	9.1569e-09	118.4	1	0
LSVDYGK	7	0	780.402	B3KT06;B3KPS3;P68363;A8JZY9;P68366;B4DDU2;F8VQQ4;C9JDS9;C9JEV8;C9JQ00;C9JJQ8;D3DX41;Q53GA7;F5H5D3;Q9BQE3;B7Z1K5	B3KT06	122	128	TUBA1B;TUBA4A;TUBA1A;MGC16703;TUBA1C	Tubulin alpha-1B chain;Tubulin alpha-4A chain;Tubulin alpha-1C chain	no	2	0.028811	88.643	1	68659000
LTEGCSFR	8	0	911.417	P42677;H0YMV8;Q71UM5;C9J1C5;A4D1G5	P42677	73	80	RPS27;RPS27L;LOC392748	40S ribosomal protein S27;40S ribosomal protein S27-like	yes	2	0.00389	113.89	1	0
LTMLNTVSK	9	0	1005.55	M0R0I3;Q9UQD4;Q6FGM0;Q99961;M0QYE0	M0R0I3	33	41	SH3GL1	Endophilin-A2	yes	2	0.006447	96.311	1	45748000
LTNSMMMHGR	10	0	1176.52	M0R0F0;Q53G25;A0A024R4Q8;M0R0R2;P46782;Q59EK8	M0R0F0	72	81	RPS5	40S ribosomal protein S5;40S ribosomal protein S5, N-terminally processed	yes	3	0.0019347	61.65	1	13023000
LTSLNVK	7	0	773.465	P26599;A6NLN1;A0A0U1RRM4;Q59H49;A0A087WU68;K7EK45;A0A024R163;O95758	P26599	260	266	PTBP1;ROD1;PTBP3	Polypyrimidine tract-binding protein 1;Polypyrimidine tract-binding protein 3	yes	2	0.032665	86.838	1	244170000
LTTPTYGDLNHLVSATMSGVTTCLR	25	0	2650.31	B4DE77;P04350;M0R2D3;A1L196;B7ZAF0;Q5JP53;Q5SU16;P07437;Q5ST81;B4DY90;B7ZAK1;Q9BUU9;B4E052;B4DQN9;B2R6L0;Q96B85;B4DXZ5;B4DMU8;Q1KSF8;A5D907;A5D906;A1L195;Q8IZ29;Q8IWP6;P68371;Q9BVA1;Q13885;A0A024QZU2;O43209;B7Z4N1;Q9UGA2	B7ZAF0	188	212	TUBB4A;TUBB;XTP3TPATP1;TUBB2A;TUBB2B;TUBB2C;TUBB4B;DKFZp566F223	Tubulin beta-4A chain;Tubulin beta chain;Tubulin beta-4B chain;Tubulin beta-2B chain;Tubulin beta-2A chain	no	2;3	1.4681e-05	58.418	2	0
LVAGEMGQNEPDQGGQR	17	0	1784.81	A0A0S2Z410;Q99714;Q5H928;A0A0S2Z434	A0A0S2Z410	131	147	HSD17B10	3-hydroxyacyl-CoA dehydrogenase type-2	yes	2;3	7.4879e-08	124.42	2	500680000
LVDMMER	7	0	892.415	F6S8Q4;A0A0D9SFB3;A0A2R8YF78;A0A2R8YCW1;A0A0D9SG12;A0A2R8YFR4;A0A2U3TZJ9;A0A2R8YFS5;B5BTY4;A0A2R8Y4A4;Q59GX6;A0A2R8Y645;A0A0D9SF53;O00571;A0A2R8YDT5;A0A2R8Y7T2;A0A2R8Y5G6;A0A2R8YDH3;B4DLU5;A0A024R9A4;O15523;B4E010	F6S8Q4	294	300	DDX3X;DDX3Y	ATP-dependent RNA helicase DDX3X;ATP-dependent RNA helicase DDX3Y	yes	2	0.01409	135.87	1	133900000
LVGQGASAVLLDLPNSGGEAQAK	23	0	2194.16	A0A0S2Z410;Q99714;Q5H928;A0A0S2Z434	A0A0S2Z410	30	52	HSD17B10	3-hydroxyacyl-CoA dehydrogenase type-2	yes	2;3	2.3118e-09	77.146	2	163420000
LVGSQEELASWGHEYVR	17	0	1958.95	Q59EG8;Q13200;Q9NSM5;H7C2Q3	Q59EG8	149	165	PSMD2;DKFZp564A2282	26S proteasome non-ATPase regulatory subunit 2	yes	2;3	4.4312e-08	128.28	2	540220000
LVLLELNFLPTTGTK	15	0	1657.97	R4GMR5;V9HW09;P48556;Q5U0B3;B4E2Y4;K7EJR3;K7ENY6	R4GMR5	58	72	PSMD8;HEL-S-91n	26S proteasome non-ATPase regulatory subunit 8	yes	2	6.8738e-06	111.63	1	64109000
LVMEEAPESYK	11	0	1294.61	Q9Y3I0	Q9Y3I0	466	476	RTCB	tRNA-splicing ligase RtcB homolog	yes	2	0.0013334	120.12	1	125120000
LVNHFVEEFK	10	0	1260.65	A8K5I0;A0A0G2JIW1;P0DMV9;P0DMV8;A0A1U9X7W4;B4DNT8;Q59EJ3;B4DWK5;B4DI39;B4E1S9;B4DFN9;B4E388;B4DVU9;V9GZ37;B3KTT5;B4DNV4	A8K5I0	237	246	HEL-S-103;HSPA1B;HSPA1A	Heat shock 70 kDa protein 1B;Heat shock 70 kDa protein 1A	yes	2;3	0.0014128	134.77	2	1329600000
LVNHFVEEFKR	11	1	1416.75	A8K5I0;A0A0G2JIW1;P0DMV9;P0DMV8;A0A1U9X7W4;B4DNT8;Q59EJ3;B4DWK5;B4DI39;B4E1S9;B4DFN9;B4E388;B4DVU9;V9GZ37;B3KTT5;B4DNV4	A8K5I0	237	247	HEL-S-103;HSPA1B;HSPA1A	Heat shock 70 kDa protein 1B;Heat shock 70 kDa protein 1A	yes	2;3	3.0058e-06	156.35	3	460120000
LVNIMPYELTR	11	0	1347.72	Q59FI2;H0Y6Z7;P10586;H0Y4H1;H0Y7Z9;Q5W9G3;Q7Z3X4;B3KWM1;B3KXA8;H0Y380;B3KXJ7;B4DWI5	Q59FI2	1315	1325	PTPRF;LAR;DKFZp686B1310	Receptor-type tyrosine-protein phosphatase F;Protein-tyrosine-phosphatase	yes	2	1.4332e-06	154.56	1	122310000
LVQAFQFTDK	10	0	1195.62	Q06830;A0A0A0MSI0;B2R4P2;A0A0A0MRQ5	Q06830	159	168	PRDX1	Peroxiredoxin-1	yes	2	0.0019939	130.56	1	74520000
LVQAFQYTDK	10	0	1211.62	V9HW63;Q13162;H7C3T4	V9HW63	231	240	HEL-S-97n;PRDX4	Peroxiredoxin-4	yes	2	0.0016211	107.57	1	178880000
LVQSPNSYFMDVK	13	0	1526.74	P42677;H0YMV8;Q71UM5;C9JLI6;A4D1G5	P42677	24	36	RPS27;RPS27L;LOC392748	40S ribosomal protein S27;40S ribosomal protein S27-like	yes	2	0.0045948	59.067	1	238460000
LVSSDPEINTK	11	0	1201.62	Q9Y266	Q9Y266	257	267	NUDC	Nuclear migration protein nudC	yes	2	0.0021831	75.378	1	89376000
LVTANTIDQK	10	0	1101.6	Q9NW36;A0A087WSW7;F6XU50;Q6I7N8;A0A0B4J1V9;Q9NRZ9	Q9NW36	159	168	HELLS	Lymphoid-specific helicase	yes	2	0.0095797	70.856	1	25811000
LVTDCVAAMNPDAVLR	16	0	1686.84	B7Z9J7;A6NF51;V9HWF9;O95861	B7Z9J7	147	162	BPNT1;HEL20	3(2),5-bisphosphate nucleotidase 1	yes	2	3.3966e-05	65.395	1	0
LVTDLTK	7	0	788.464	C9JKR2;H0YA55;D6RHD5;B7WNR0;B4DPR2;F6KPG5;A0A0C4DGB6;A8K9P0;B2RBS8;B4DPP6;P02768;Q56G89	C9JKR2	66	72	ALB	Serum albumin	yes	2	0.03508	105.2	1	156920000
LVVPASQCGSLIGK	14	0	1370.76	B4DRD7;H3BRU6;F8VZX2;Q15366;F8VXH9;B4DLC0;F8W0G4;F8W1G6;J3QT27;Q5MJP6;E9PFP8;P57721;H3BND9	B4DRD7	64	77	PCBP2;PCBP3	Poly(rC)-binding protein 2;Poly(rC)-binding protein 3	yes	2	0.00015242	66.595	1	0
LVVPATQCGSLIGK	14	0	1384.77	Q53SS8;Q15365	Q53SS8	102	115	PCBP1	Poly(rC)-binding protein 1	yes	2	7.9624e-06	83.397	1	0
LWDCGR	6	0	748.333	A0A024R5N4;F5H0C4;Q9BRP4;F5H0F7;F5H103;F5H3I1;F5H3E9;H0YGB1	A0A024R5N4	185	190	WDR71;PAAF1	Proteasomal ATPase-associated factor 1	yes	2	0.012778	94.95	1	0
LYDNLLEQNLIR	12	0	1502.81	O00231	O00231	326	337	PSMD11	26S proteasome non-ATPase regulatory subunit 11	yes	2	5.3082e-05	144.65	1	770090000
LYDVPANSMR	10	0	1164.56	J3QT28;A0A140VJF3;O43684;J3QSX4	J3QT28	41	50	BUB3	Mitotic checkpoint protein BUB3	yes	2	0.0021151	126.07	1	72969000
LYENFISEFEHR	12	0	1582.74	A0A024R201;J3KNQ3;Q53GN6;Q9Y6E3;Q9UNM6;A0A087WUL9;E9PQG3;E9PPD2	A0A024R201	59	70	PSMD13	26S proteasome non-ATPase regulatory subunit 13	yes	2;3	3.4409e-05	136.63	2	457270000
LYGPSSVSFADDFVR	15	0	1658.79	A0A024R5K8;P50454;B4DN87;A8K259;E9PJH8;E9PIG2;E9PRS3;E9PNX1;E9PK86;E9PMI5;E9PR70;E9PPV6;E9PQ34;Q9NPA9	A0A024R5K8	134	148	SERPINH1;ra-a47	Serpin H1	yes	2	4.4762e-06	107.18	1	231070000
LYSPSQIGAFVLMK	14	0	1552.83	B7Z4V2;V9HW84;P38646;Q8N1C8;B7Z1V7;Q2F839	B7Z4V2	146	159	HEL-S-124m;HSPA9	Stress-70 protein, mitochondrial	yes	2	9.4336e-05	71.349	2	224470000
MADLHAVPR	9	0	1008.52	Q6DEN2;A0A140VK07;Q8IXW6;Q14195;B4DLZ4	Q6DEN2	602	610	DPYSL3	Dihydropyrimidinase-related protein 3	yes	2	0.0068772	89.296	1	28949000
MALIQMGSVEEAVQALIDLHNHDLGENHHLR	31	0	3489.72	P26599;A6NLN1;A0A0U1RRM4;A0A0D9SF20	P26599	493	523	PTBP1	Polypyrimidine tract-binding protein 1	yes	3;4;5;6	3.3329e-38	170.27	4	628770000
MAQFDAK	7	0	809.374	Q53YD7;P26641	Q53YD7	213	219	EEF1G	Elongation factor 1-gamma	yes	2	0.031152	97.473	1	34946000
MAVTFIGNSTAIQELFK	17	0	1868.97	B7ZAF0;Q5JP53;Q5SU16;P07437;Q5ST81;Q6LC01;B4DY90;B7ZAK1;Q9BUU9;B4E052;B4DQN9;Q96B85;B4DXZ5;B4DMU8;B4DMJ5;Q6P602;A4UCU2	B7ZAF0	334	350	TUBB	Tubulin beta chain	yes	2	2.8985e-07	128.28	1	133030000
MDEMATTQISKDELDELKEAFAK	23	2	2642.25	B4DPW9;Q53GY0;P13797;U3KQI3;B4DPU6;F2Z2Z9	B4DPW9	1	23	PLS3	Plastin-3	yes	3	5.2585e-10	78.324	1	553720000
MDGIVPDIAVGTKR	14	1	1470.79	P26599;A0A0U1RRM4;A0A0D9SF20;K7EKJ7	P26599	1	14	PTBP1	Polypyrimidine tract-binding protein 1	yes	2	0.00011082	67.153	1	133550000
MDLGECLK	8	0	907.414	Q9Y383;B3KSL5;A0A0A6YYJ8;B3KRR1	Q9Y383	54	61	LUC7L2	Putative RNA-binding protein Luc7-like 2	yes	2	0.01077	75.109	1	0
MEEFKDQLPADECNK	15	1	1795.78	B7Z4V2;V9HW84;P38646;Q8N1C8;B7Z4T3	B7Z4V2	582	596	HEL-S-124m;HSPA9	Stress-70 protein, mitochondrial	yes	2	1.1568e-06	101.93	1	0
MEEIGILVEK	10	0	1159.62	A8K2M0;P43686	A8K2M0	1	10	PSMC4	26S protease regulatory subunit 6B	yes	2	0.014349	50.473	2	20639000
MEIVELEDHPFFVGVQYHPEFLSR	24	0	2917.41	P17812;B4E1E0	P17812	509	532	CTPS1	CTP synthase 1;CTP synthase	yes	3	4.791e-05	51.175	1	59050000
MERPGPSLK	9	1	1013.53	A0A140VK73;Q9NPH2;B3KSG0;B7Z3K3;J3QS51	A0A140VK73	508	516	ISYNA1	Inositol-3-phosphate synthase 1	yes	2	0.027132	76.17	1	0
MERPGPSLKR	10	2	1169.63	A0A140VK73;Q9NPH2;B3KSG0;B7Z3K3;J3QS51	A0A140VK73	508	517	ISYNA1	Inositol-3-phosphate synthase 1	yes	2	0.013016	49.418	1	36583000
MHDLNTDQENLVGTHDAPIR	20	0	2275.07	J3QT28;A0A140VJF3;O43684;J3QSX4;B4DDM6	J3QT28	81	100	BUB3	Mitotic checkpoint protein BUB3	yes	4	1.1584e-10	93.812	1	58787000
MIHILLYYK	9	0	1192.67	B1AJY5;O75832;B1AJY7	O75832	154	162	PSMD10	26S proteasome non-ATPase regulatory subunit 10	no	1;2;3	0.00040269	124.89	69	11784000000
MIKPFFHSLSEK	12	1	1462.76	H9ZYJ2;P10599	H9ZYJ2	37	48	TXN	Thioredoxin	yes	2;3;4	0.00013735	106.2	3	804650000
MIMATNRPDTLDPALLRPGR	20	2	2237.18	A0A087X2I1;P62333	A0A087X2I1	289	308	PSMC6	26S protease regulatory subunit 10B	yes	4	0.016413	32.926	1	164270000
MIMQDKLEK	9	1	1134.58	A0A024RDQ0;A0A024RDS1;Q92598;B4DY72;B4DF68;A0A0A0MSM0;B0AZU6;B4DSE8;B4E0H6;B4E354;B4DT47;A0A087WYC1;B4DIZ3;B4DUS3;Q59GF8;E9PDE8;B4DXT2;Q53ZP9;A0A140VKE7;V9HW33;B4DH02;B4DZR0;O95757;P34932	A0A024RDQ0	577	585	HSPH1;HSPA4;HSPA4L;HEL-S-5a	Heat shock protein 105 kDa;Heat shock 70 kDa protein 4L;Heat shock 70 kDa protein 4	yes	2	0.027598	91.069	1	75715000
MINLSVPDTIDER	13	0	1501.74	B4DPW9;Q53GY0;P13797;A0A0A0MSQ0;U3KQI3;Q59GX5;V9HWJ7;Q53FI1;A0A024RDT4;P13796;Q5TBN3	B4DPW9	142	154	PLS3;HEL-S-37;LCP1	Plastin-3;Plastin-2	yes	2	1.592e-05	140.49	1	149760000
MIPGVVDTGLFINMAER	17	0	1861.94	Q53R32;P49247	Q53R32	143	159	RPIA	Ribose-5-phosphate isomerase	yes	2	0.00069335	61.375	1	0
MISLSYSR	8	0	955.48	Q6IBN0;O43242;B3KNN7;Q96N86;B4DV84;B4DPM7;Q8N9M2	Q6IBN0	409	416	PSMD3	26S proteasome non-ATPase regulatory subunit 3	yes	2	0.011644	116.9	1	38808000
MITSAAGIISLLDEDEPQLKEFALHK	26	1	2868.49	Q99460;B2R6D0;Q05CW6;Q05BX4;C9J9M4;F8WCE3	Q99460	1	26	PSMD1	26S proteasome non-ATPase regulatory subunit 1	yes	4	2.0289e-05	52.321	1	128750000
MKDVPGFLQQSQSSGPGQPAVWHR	24	1	2636.29	A0A024R201;Q5HYL3	A0A024R201	1	24	PSMD13;DKFZp686H16220		yes	3;4	4.724e-05	53.342	2	109510000
MKEIAEAYLGK	11	1	1251.65	V9HW22;Q53GZ6;P11142;E9PKE3;Q96IS6;B3KTV0;Q53HF2;E9PN89;E9PQQ4;E9PQK7;E9PK54;E9PLF4;B4DTX2;E9PPY6;E9PI65;A4D111	V9HW22	127	137	HEL-S-72p;HSPA8;LOC401308	Heat shock cognate 71 kDa protein	yes	2	0.0027146	88.681	1	603670000
MKEIAEAYLGYPVTNAVITVPAYFNDSQR	29	1	3259.62	A8K5I0;A0A0G2JIW1;P0DMV9;P0DMV8;A0A1U9X7W4;B4DNT8;Q59EJ3;B4DWK5;B4E1S9;Q9UQC1	A8K5I0	127	155	HEL-S-103;HSPA1B;HSPA1A;HSP70-1	Heat shock 70 kDa protein 1B;Heat shock 70 kDa protein 1A	yes	3;4	7.3194e-06	51.9	2	561470000
MKETAENYLGHTAK	14	1	1591.77	B7Z4V2;V9HW84;P38646;B7Z1V7;B7Z4T3;Q2F839	B7Z4V2	160	173	HEL-S-124m;HSPA9	Stress-70 protein, mitochondrial	yes	3	0.041769	28.64	1	470540000
MLATLEPEQR	10	0	1186.6	P54886	P54886	376	385	ALDH18A1	Delta-1-pyrroline-5-carboxylate synthase;Glutamate 5-kinase;Gamma-glutamyl phosphate reductase	yes	2	0.0015509	87.639	1	0
MLDMGFEPQIR	11	0	1335.63	F6S8Q4;A0A0D9SFB3;A0A2R8YF78;A0A2R8YCW1;A0A0D9SG12;A0A2R8YFR4;A0A2U3TZJ9;A0A2R8YFS5;B5BTY4;A0A2R8Y4A4;Q59GX6;A0A2R8Y645;A0A0D9SF53;O00571;A0A2R8YDT5;A0A2R8Y7T2;A0A2R8Y5G6;Q5S4N1;A0A2R8YDH3;B4DLU5;A0A024R9A4;O15523;B4E132;B4E010;A0A1X7SBZ2;A0A1W2PQ51;Q59F66;Q92841;B4DZQ7;J3KRZ1;J3QSF1;B4DN41;J3KTA4;B5BUE6;P17844;Q7Z2V5;Q59E92;B4DNG2	A0A1X7SBZ2	330	340	DDX3X;DDX3Y;DDX17;DDX5;DKFZp686J01190	ATP-dependent RNA helicase DDX3X;ATP-dependent RNA helicase DDX3Y;Probable ATP-dependent RNA helicase DDX17;Probable ATP-dependent RNA helicase DDX5	no	2	0.0011049	83.948	1	348010000
MLENTDNSSPSTEHSQGLEK	20	0	2202.97	Q96H79	Q96H79	249	268	ZC3HAV1L	Zinc finger CCCH-type antiviral protein 1-like	yes	2;3	4.0156e-11	109.87	2	431250000
MLGTEGGEGFVVK	13	0	1322.65	E9PCY7;G8JLB6;P31943;D6RIT2;D6RIU0;D6RBM0;E7EQJ0;D6RAM1;E5RGV0;D6R9T0;D6RFM3;D6RDU3;D6RJ04;D6RIH9;E7EN40;D6RF17;D6RDL0;D6R9D3;E5RJ94	E9PCY7	2	14	HNRNPH1	Heterogeneous nuclear ribonucleoprotein H;Heterogeneous nuclear ribonucleoprotein H, N-terminally processed	yes	2	0.0020031	58.699	1	25237000
MLPDKDCR	8	1	976.447	G3V1A4;E9PP50;V9HWI5;E9PK25;P23528;E9PLJ3;E9PS23;B4E112;E9PQB7	G3V1A4	57	64	CFL1;HEL-S-15	Cofilin-1	yes	2	0.0099144	97.602	1	0
MLQHIDYR	8	0	1074.53	J3QLE5;Q66K91;Q5XPV6;B4DVS0;X5DP00;Q53HE7;Q9UIS4;Q15182;P63162;P14678;J3KRY3;S4R3P3	J3QLE5	9	16	SNRPN;SNRPB	Small nuclear ribonucleoprotein-associated protein;Small nuclear ribonucleoprotein-associated protein N;Small nuclear ribonucleoprotein-associated proteins B and B	yes	3	0.0041504	86.833	1	25178000
MLQVASQASR	10	0	1089.56	K7EIN1;K7ESN4;K7EIJ0;K7EIK1;K7ENL2;A6NG10;K7EMC9;Q7Z511;A0A024R8L1;Q969T9	K7EIN1	50	59	WBP2	WW domain-binding protein 2	yes	2	0.004209	83.783	1	57333000
MLVELSK	7	0	818.457	B7Z9L0;B7Z2Z8;A8K3C3;P50991	B7Z9L0	34	40	CCT4	T-complex protein 1 subunit delta	yes	1	0.01509	86.866	1	28382000
MLVTFDEELRPLPVSVR	17	1	2000.08	Q59EG8;Q13200;B4DM22;Q13041	Q59EG8	834	850	PSMD2	26S proteasome non-ATPase regulatory subunit 2	yes	2;3	6.2448e-22	191.86	2	864510000
MMASGLTER	9	0	994.458	A0A090N7X1;A0A090N7Y2;Q9UG63	A0A090N7X1	366	374	ABCF2	ATP-binding cassette sub-family F member 2	yes	2	6.4013e-05	153.78	1	42679000
MMCGAPSATQPATAETQHIADQVR	24	0	2513.15	Q76LA1;P04080;A0A1W2PS52	Q76LA1	1	24	CSTB	Cystatin-B	yes	2	1.8121e-10	82.908	1	0
MMLGTEGGEGFVVK	14	0	1453.69	E9PCY7;G8JLB6;P31943;D6RIT2;D6RIU0;D6RBM0;E7EQJ0;D6RAM1;E5RGV0;D6R9T0;D6RFM3;D6RDU3;D6RJ04;D6RIH9;E7EN40;D6RF17;D6RDL0;D6R9D3;E5RJ94	E9PCY7	1	14	HNRNPH1	Heterogeneous nuclear ribonucleoprotein H;Heterogeneous nuclear ribonucleoprotein H, N-terminally processed	yes	2	0.014891	43.77	1	0
MNLASSFVNGFVNAAFGQDK	20	0	2116	Q59EG8;Q13200;B4DM22;Q9NSM5	Q59EG8	375	394	PSMD2;DKFZp564A2282	26S proteasome non-ATPase regulatory subunit 2	yes	3	0.000599	49.973	1	38101000
MNLSEEVDLEDYVARPDK	18	1	2121.99	A8K2M0;P43686	A8K2M0	352	369	PSMC4	26S protease regulatory subunit 6B	yes	3	0.0031751	47.752	1	172890000
MSTEEIIQR	9	0	1105.54	R4GNH3;A0A140VK42;P17980;E9PM69;A8K781;E9PKD5;E9PMD8;E9PN50;E9PLG2	R4GNH3	20	28	PSMC3	26S protease regulatory subunit 6A	yes	2	0.001836	136.16	1	102250000
MSVQPTVSLGGFEITPPVVLR	21	0	2226.21	A0A0S2Z4G7;A0A0S2Z491;P06748;Q9BTI9;A0A140VJQ2;A4ZU86;Q9NX34;E5RI98	A0A0S2Z4G7	81	101	NPM1	Nucleophosmin	yes	2	1.8886e-12	92.935	1	94519000
MTDQEAIQDLWQWR	14	0	1818.84	A0A0S2Z4G7;A0A0S2Z491;P06748;Q9BTI9	A0A0S2Z4G7	249	262	NPM1	Nucleophosmin	yes	2	3.1901e-05	104.79	1	156020000
MTISQQEFGR	10	0	1195.57	Q5VWC4;P55036;H0Y3Y9	Q5VWC4	266	275	PSMD4	26S proteasome non-ATPase regulatory subunit 4	yes	2	9.7795e-18	201.39	1	290500000
MVDILAGPDAYR	12	0	1319.65	A0A0S2Z592;B4DI01;Q53H36;A0A0S2Z5J9;Q96SZ6;H0Y721	A0A0S2Z592	198	209	CDK5RAP1	CDK5 regulatory subunit-associated protein 1	yes	2	0.0002732	81.338	1	0
MVGGVLVER	9	0	958.527	B1AQP2;Q9UHV9	B1AQP2	73	81	PFDN2	Prefoldin subunit 2	yes	2	0.006628	91.069	1	40152000
MVNDAEKFAEEDKK	14	2	1652.77	V9HWB4;P11021	V9HWB4	541	554	HEL-S-89n;HSPA5	78 kDa glucose-regulated protein	yes	3	0.002522	55.196	1	201910000
MVNHFIAEFK	10	0	1234.62	V9HW22;Q53GZ6;P11142;E9PKE3;Q96IS6;B3KTV0;Q53HF2;E9PN89;B4E1Q1;A8K7Q2	V9HW22	237	246	HEL-S-72p;HSPA8	Heat shock cognate 71 kDa protein	yes	2	0.0024927	93.111	2	85410000
MVQEAEKYK	9	1	1124.55	V9HW22;Q53GZ6;P11142;E9PKE3;Q96IS6;B3KTV0;E9PNE6;B4E1Q1;A8K7Q2;E9PS65;Q96BE0;E9PM13;Q96H53;Q9NZ87;Q9NWW3;A8K5I0;A0A0G2JIW1;P0DMV9;P0DMV8;A0A1U9X7W4;B4DNT8;B4DWK5;B4DI39;B4E1S9;B4DFN9;B4E388;B4DVU9;V9GZ37;B3KTT5;B4DNX1;B4E1T6	A8K5I0	518	526	HEL-S-72p;HSPA8;HEL-S-103;HSPA1B;HSPA1A	Heat shock cognate 71 kDa protein;Heat shock 70 kDa protein 1B;Heat shock 70 kDa protein 1A	no	2	0.026124	101.33	1	127510000
MVQEAEKYKAEDEVQR	16	2	1951.93	A8K5I0;A0A0G2JIW1;P0DMV9;P0DMV8;A0A1U9X7W4;B4DNT8;B4DWK5;B4DI39;B4E1S9;B4DFN9;B4E388;B4DVU9;V9GZ37;B3KTT5;B4DNX1;B4E1T6	A8K5I0	518	533	HEL-S-103;HSPA1B;HSPA1A	Heat shock 70 kDa protein 1B;Heat shock 70 kDa protein 1A	yes	2;3;4	1.5917e-07	107.07	3	577450000
MVSALQQQQQQQQR	14	0	1699.84	B4E231;A0A024R1N5;H0Y720;A0A024R1T4;Q9UPQ9	B4E231	373	386	TNRC6B	Trinucleotide repeat-containing gene 6B protein	yes	2	0.00022754	72.79	1	23500000
MVVPVAALFTPLK	13	0	1384.82	F5H365;B4DSQ5;Q15436;B4E0Q9;G3V5X8;G3V4Q2;G3V4V1;G3V1W4;G3V3G5;G3V2R6	F5H365	34	46	SEC23A	Protein transport protein Sec23A	yes	2	2.745e-05	87.298	1	47099000
NAEPLINLDVNNPDFK	16	0	1811.91	G3V4C6;Q5RLJ0;Q549M8;Q9Y224;H0YJB9	G3V4C6	116	131	C14orf166	UPF0568 protein C14orf166	yes	2	1.1441e-07	90.697	1	105350000
NALESYAFNMK	11	0	1286.6	A8K5I0;A0A0G2JIW1;P0DMV9;P0DMV8;A0A1U9X7W4;B4DNT8;Q59EJ3;B4DWK5;B4DI39;B4E1S9;B4DFN9;B4E388;B4DVU9;V9GZ37;B3KTT5;B4DNX1;B4E1T6;Q53FA3;B2RCQ9;A0A1U9X7X9;A0A1U9X7X4;A0A1U9X7W7;B4DI54;P34931	A8K5I0	540	550	HEL-S-103;HSPA1B;HSPA1A;HSPA1L	Heat shock 70 kDa protein 1B;Heat shock 70 kDa protein 1A;Heat shock 70 kDa protein 1-like	yes	2	0.0014567	124.23	1	585490000
NAMGSLASQATK	12	0	1177.58	Q5VWC4;P55036;H0Y3Y9;H0Y561	Q5VWC4	357	368	PSMD4	26S proteasome non-ATPase regulatory subunit 4	yes	2	0.00053828	132.78	1	1173100000
NANAVMEYEK	10	0	1167.52	K7ER44;K7EPP7;K7ESP1;K7EIH8;B7Z9W6;Q59EH7;A8K4T2;Q99615;K7EJL5;K7EN19;K7EJV7;B4DKK3	K7ER44	82	91	DNAJC7	DnaJ homolog subfamily C member 7	yes	2	0.027116	54.982	1	74634000
NAQAIEDMVGYAQETQHEK	19	0	2160.97	Q99460;B2R6D0;A0A087WW66;Q05CW6;Q05BX4;H7C378	Q99460	525	543	PSMD1	26S proteasome non-ATPase regulatory subunit 1	yes	3	0.00014656	58.024	1	111240000
NCPHVVVGTPGR	12	0	1234.62	B4DX78;O00148;K7EPJ3;K7EQN7;A0A024R7H0;A0A0D9SEM9	B4DX78	206	217	DDX39A;DDX39	ATP-dependent RNA helicase DDX39A	yes	2	0.01967	42.743	1	0
NCTIVSPDAGGAK	13	0	1231.59	B1ALA9;Q53FW2;A0A2R8Y7H4;P60891	B1ALA9	131	143	PRPS1	Ribose-phosphate pyrophosphokinase 1	yes	2	3.2689e-05	130.98	1	0
NDGAAILAAVSSIAQK	16	0	1527.83	B4DJ81;E5KRK5;P28331;Q9P1A0	B4DJ81	368	383	NDUFS1	NADH-ubiquinone oxidoreductase 75 kDa subunit, mitochondrial	yes	2	2.5959e-07	92.925	1	36128000
NEALAALLRDGETLEELMK	19	1	2115.09	B4DPW9;Q53GY0;P13797;A0A0A0MSQ0;Q96HI1	B4DPW9	221	239	PLS3	Plastin-3	yes	3	0.002973	47.223	1	42791000
NECDPALALLSDYVLHNSNTMR	22	0	2475.15	Q59EG8;Q13200;B4DM22;Q9NSM5	Q59EG8	462	483	PSMD2;DKFZp564A2282	26S proteasome non-ATPase regulatory subunit 2	yes	3	6.213e-13	100.53	1	0
NEEDAAELVALAQAVNAR	18	0	1882.94	A0A024R1A3;P22314	A0A024R1A3	351	368	UBE1;UBA1	Ubiquitin-like modifier-activating enzyme 1	yes	2	1.9543e-09	124.12	1	67615000
NELESYAYSLK	11	0	1315.63	V9HWB4;P11021	V9HWB4	563	573	HEL-S-89n;HSPA5	78 kDa glucose-regulated protein	yes	2	0.00065194	88.681	1	181810000
NFGSYVTHETK	11	0	1281.6	Q6FGH9;Q96FJ2;P63167	Q6FGH9	61	71	DNCL1;DYNLL2;DYNLL1	Dynein light chain 2, cytoplasmic;Dynein light chain 1, cytoplasmic	yes	2	0.01266	58.246	1	120720000
NFIVWLEDQK	10	0	1290.66	G3V4C6;Q5RLJ0;Q549M8;Q9Y224;G3V4E7	G3V4C6	27	36	C14orf166	UPF0568 protein C14orf166	yes	2	0.0020995	98.033	1	93808000
NFPNAIEHTLQWAR	14	0	1695.85	A0A024R1A3;P22314;B4DDE4;B4DL67	A0A024R1A3	636	649	UBE1;UBA1	Ubiquitin-like modifier-activating enzyme 1	yes	3	0.0024607	50.222	1	26889000
NFYQEHPDLAR	11	0	1388.65	B4DN41;J3KTA4;B5BUE6;P17844;Q7Z2V5;Q59E92;B4DNG2;J3QRQ7;X6RLV5;J3QR02;J3KRX8;J3KTQ4;C1IK54	B4DN41	46	56	DDX5;DKFZp686J01190;DDX5-ETV4 fusion	Probable ATP-dependent RNA helicase DDX5	yes	3	6.4366e-05	99.283	1	70227000
NFYVEHPEVAR	11	0	1359.66	A0A1X7SBZ2;A0A1W2PQ51;Q59F66;Q92841;B4DZQ7	A0A1X7SBZ2	133	143	DDX17	Probable ATP-dependent RNA helicase DDX17	yes	2;3	8.884e-05	93.111	2	798180000
NIANPTAMLLSASNMLR	17	0	1815.93	A0A087WZN1;O43837;A0A087X2E5;A0A0D9SG66;Q9UIC5	A0A087WZN1	318	334	IDH3B	Isocitrate dehydrogenase [NAD] subunit, mitochondrial;Isocitrate dehydrogenase [NAD] subunit beta, mitochondrial	yes	2;3	3.3961e-10	131.13	2	508960000
NIEDVIAQGIGK	12	0	1255.68	A0A024RCA7;P05387;H0YDD8	A0A024RCA7	50	61	RPLP2	60S acidic ribosomal protein P2	yes	2	0.00013155	99.855	1	89860000
NIETIINTFHQYSVK	15	0	1805.93	B2R4M6;P06702	B2R4M6	11	25	S100A9	Protein S100;Protein S100-A9	yes	3	0.020041	35.711	1	26866000
NIFAILQSVK	10	0	1131.67	A0A0S2Z5N1;B4DV47;A0A0S2Z5M9;A0A2R8YHB3;Q6P1J9	A0A0S2Z5N1	72	81	CDC73	Parafibromin	yes	2	0.003743	85.676	1	22199000
NIILEEGKEILVGDVGQTVDDPYATFVK	28	1	3061.59	G3V1A4;E9PP50;V9HWI5;E9PK25;P23528;E9PLJ3;E9PS23;B4E112;E9PQB7	G3V1A4	29	56	CFL1;HEL-S-15	Cofilin-1	yes	3	6.9863e-06	56.914	1	103990000
NLDIERPTYTNLNR	14	1	1717.87	B3KT06;B3KPS3;P68363;A8JZY9;P68366;B4DDU2;F8VVB9;F8VQQ4;C9JDS9;Q53GA7;F5H5D3;Q9BQE3;B7Z1K5	B3KT06	181	194	TUBA1B;TUBA4A;TUBA1A;TUBA1C	Tubulin alpha-1B chain;Tubulin alpha-4A chain;Tubulin alpha-1C chain	no	2;3	7.3735e-13	162.93	2	1180600000
NLGQNLWGPHR	11	0	1290.66	A5PLK7;A0A024RAC5;Q9P258	A5PLK7	66	76	RCC2	Protein RCC2	yes	2	0.0014458	74.301	1	0
NLIDAGVDALR	11	0	1155.62	H0Y4R1;P12268;Q6RUP8;B7Z1G4	H0Y4R1	244	254	IMPDH2	Inosine-5-monophosphate dehydrogenase 2	yes	2	0.00027674	99.568	1	39402000
NLLLALVGEVGELAELFQWK	20	0	2241.24	Q9H773	Q9H773	55	74	DCTPP1	dCTP pyrophosphatase 1	yes	3	0.015842	33.836	1	30207000
NLPLPPPPPPR	11	0	1193.69	B4DUQ1;A0A024R228;P61978;B4DFF1;Q5EC54;Q5T6W2;B3KU16	B4DUQ1	282	292	HNRPK;HNRNPK	Heterogeneous nuclear ribonucleoprotein K	yes	2	0.0010322	133.55	1	351190000
NLQEIQQAGER	11	0	1284.64	H3BV11;H3BRI8;H3BM93;A8K897;H3BVG0;Q8N1F7	H3BV11	32	42	NUP93	Nuclear pore complex protein Nup93	yes	2	0.0002172	101.65	1	18492000
NMMAACDPR	9	0	1007.4	B4DE77;P04350;B4DJ43;B4DFH6;B4E386;K7ESM5;B3KS31;B4DP54;Q3ZCM7;Q9BUF5;B7ZAF0;Q5JP53;Q5SU16;P07437;Q5ST81;Q6LC01;B4DY90;B7ZAK1;Q9BUU9;B4E052;B4DQN9;B2R6L0;Q96B85;B4DXZ5;B4DMU8;Q1KSF8;A0A075B736;Q5SQY0;A6NNZ2;Q8IZ29;Q8IWP6;P68371;Q8N6N5;B3KML9;Q96HX0;A4UCT2;Q9BVA1;Q13885;A0A024QZU2;O43209;B7Z4N1;Q9UGA2	B7ZAF0	269	277	TUBB4A;TUBB6;TUBB8;TUBB;XTP3TPATP1;TUBB2C;TUBB4B;TUBB2B;TUBB2A;DKFZp566F223	Tubulin beta-4A chain;Tubulin beta-8 chain;Tubulin beta-6 chain;Tubulin beta chain;Tubulin beta-8 chain-like protein LOC260334;Tubulin beta-4B chain;Tubulin beta-2B chain;Tubulin beta-2A chain	no	2	0.002487	86.833	1	0
NMSVIAHVDHGK	12	0	1306.65	P13639;Q6PK56;B4DPU3;B4DRE8;B4DMC6	P13639	21	32	EEF2	Elongation factor 2	yes	2;3	0.00018627	122.26	4	1508900000
NNQFQALLQYADPVSAQHAK	20	0	2242.11	P26599;A6NLN1;A0A0U1RRM4;Q59H49;A0A087WU68;K7EKJ7;K7EK45	P26599	219	238	PTBP1	Polypyrimidine tract-binding protein 1	yes	3	1.0432e-10	65.022	1	882740000
NPATTNQTEFER	12	0	1406.64	B5BU53;B2R9L6;A0A024R880;P50750	B5BU53	359	370	CDK9	Cyclin-dependent kinase 9	yes	2	4.6481e-05	145.89	1	43561000
NPEHFVVCNR	10	0	1213.57	A0MNN4;Q2TAY7	A0MNN4	409	418	SMU1	WD40 repeat-containing protein SMU1;WD40 repeat-containing protein SMU1, N-terminally processed	yes	2	0.00036258	136.16	1	0
NQDVSISNVQPK	12	0	1327.67	B4DVQ2;H0Y3K4;Q96EV2	B4DVQ2	595	606	RBM33	RNA-binding protein 33	yes	2	0.014328	52.49	1	21699000
NQLTSNPENTVFDAK	15	0	1676.8	V9HWB4;P11021;B4DEF7	V9HWB4	82	96	HEL-S-89n;HSPA5	78 kDa glucose-regulated protein	yes	2	0.00010549	70.488	1	115650000
NQVALNPQNTVFDAK	15	0	1657.84	A8K5I0;A0A0G2JIW1;P0DMV9;P0DMV8;A0A1U9X7W4;B4DNT8;Q59EJ3;B4DFN9;B4E388;B4DNX1;B4E1T6	A8K5I0	57	71	HEL-S-103;HSPA1B;HSPA1A	Heat shock 70 kDa protein 1B;Heat shock 70 kDa protein 1A	yes	2	5.9068e-06	76.533	1	656400000
NQVAMNPTNTVFDAK	15	0	1648.79	V9HW22;Q53GZ6;P11142;E9PKE3;Q53HF2;E9PNE6;E9PQQ4;E9PQK7;E9PK54;E9PLF4;B4DTX2;E9PPY6;E9PN25	V9HW22	57	71	HEL-S-72p;HSPA8	Heat shock cognate 71 kDa protein	yes	2	1.1782e-06	124.1	2	322320000
NRHEIAVMLLEGGANPDAK	19	1	2034.03	B1AJY5;B1AJY6;O75832;B1AJY7	O75832	117	135	PSMD10	26S proteasome non-ATPase regulatory subunit 10	no	2;3;4	1.4069e-38	251.91	65	32144000000
NRHEIAVMLLEGGANPDAKDHYEATAMHR	29	2	3245.55	B1AJY5;B1AJY6;O75832;B1AJY7	O75832	117	145	PSMD10	26S proteasome non-ATPase regulatory subunit 10	no	3;4;5;6	3.7609e-38	167.78	78	153970000000
NRPEDYQGGR	10	1	1190.54	Q15084	Q15084	109	118	PDIA6	Protein disulfide-isomerase A6	yes	2	0.017357	83.948	1	33914000
NSEEQPSGGTTVLQR	15	0	1601.76	Q4VCS5	Q4VCS5	3	17	AMOT	Angiomotin	yes	2	1.7418e-06	124.1	1	53841000
NSLESYAFNMK	11	0	1302.59	V9HW22;Q53GZ6;P11142;E9PKE3;Q96IS6;B3KTV0;E9PNE6;B4E1Q1;A8K7Q2;E9PS65;Q96BE0;E9PM13;Q96H53;Q9NZ87;Q9NWW3	V9HW22	540	550	HEL-S-72p;HSPA8	Heat shock cognate 71 kDa protein	yes	2	0.0083456	61.602	1	151710000
NSMFHNR	7	0	904.397	E9PIX6;B4DJ87;E9PKG1;Q99873;E9PMZ2;E9PMW9;E9PNR9;E9PQ98;H0YDE4	E9PIX6	32	38	PRMT1	Protein arginine N-methyltransferase 1	yes	2	0.021158	90.706	1	0
NSMPASSFQQQK	12	0	1351.62	Q9Y383;B3KSL5;A0A0A6YYJ8;B3KRR1;B8ZZ10;A8MYV2;D3DU41;Q1W6G4;Q9NQ29;Q53G47	Q9Y383	175	186	LUC7L2;LUC7L	Putative RNA-binding protein Luc7-like 2;Putative RNA-binding protein Luc7-like 1	yes	2	0.00020907	93.111	1	144570000
NSQFAGGPLGNPNTTAK	17	0	1672.82	E9PF10;A0A024R071;O75694;B4DLT2	E9PF10	724	740	NUP155	Nuclear pore complex protein Nup155	yes	2	0.024617	45.115	1	67875000
NSSYFVEWIPNNVK	14	0	1695.83	B4DE77;P04350;B4DJ43;B4DFH6;B4E386;K7ESM5;B3KS31;B4DP54;Q9BUF5;B7ZAF0;Q5JP53;Q5SU16;P07437;Q5ST81;Q6LC01;B4DY90;B7ZAK1;Q9BUU9;B4E052;B4DQN9;B2R6L0;Q96B85;B4DXZ5;B4DMJ5;Q6P602;Q8IZ29;Q8IWP6;P68371;Q8N6N5;B3KML9;Q96HX0;A4UCT2;Q9BVA1;Q13885;A0A024QZU2;O43209;B7Z4N1;Q9UGA2	B7ZAF0	308	321	TUBB4A;TUBB6;TUBB;TUBB2C;TUBB4B;TUBB2B;TUBB2A;DKFZp566F223	Tubulin beta-4A chain;Tubulin beta-6 chain;Tubulin beta chain;Tubulin beta-4B chain;Tubulin beta-2B chain;Tubulin beta-2A chain	no	2	0.015386	49.35	1	322140000
NSVCHTATVIANSFMHCGTTSDQFLR	26	0	2839.28	Q99460;A0A087WW66;Q05CW6;Q05BX4	Q99460	362	387	PSMD1	26S proteasome non-ATPase regulatory subunit 1	yes	3;4	3.3542e-22	142.32	2	0
NTFDHPYPTTK	11	0	1319.61	B4DH46;P61962	B4DH46	63	73	DCAF7	DDB1- and CUL4-associated factor 7	yes	2	0.0009158	96.665	1	80356000
NTLTNIAMRPGLEGYALPR	19	1	2086.1	B1AHB0;P33992;Q53FG5;A8K521;B1AHB1;B4DQ39;B3KVF0;B1AHA9;B1AHB2	B1AHB0	177	195	MCM5	DNA helicase;DNA replication licensing factor MCM5	yes	2;3	0.0010926	76.073	2	194970000
NTVVATGGYGR	11	0	1093.55	B3KT34;A0A024QZ30;P31040;Q0QF12;D6RFM5;B4DYN5	B3KT34	26	36	SDHA	Succinate dehydrogenase [ubiquinone] flavoprotein subunit, mitochondrial	yes	2	0.0049988	65.933	1	34257000
NVCTEAGMFAIR	12	0	1310.61	A0A087X2I1;P62333;V9HW24	A0A087X2I1	359	370	PSMC6;HEL-S-73	26S protease regulatory subunit 10B	yes	2	0.00013365	110.76	1	0
NVLLDPQLVPGGGASEMAVAHALTEK	26	0	2616.36	B4DUR8;B3KX11;Q2TU64;Q59H77;P49368	B4DUR8	355	380	CCT3	T-complex protein 1 subunit gamma	yes	3	0.024649	26.9	1	174150000
NVLLNNSEK	9	0	1029.55	Q08J23	Q08J23	569	577	NSUN2	tRNA (cytosine(34)-C(5))-methyltransferase	yes	2	0.025843	66.351	1	36610000
NVLLTGATGFLGK	13	0	1289.73	E9PNW8;Q9H600;B2RDG1;Q8WVX9	E9PNW8	12	24	FAR1	Fatty acyl-CoA reductase 1	yes	2	7.8026e-06	81.865	1	24831000
NVQLQENEIR	10	0	1241.64	A0A087WYY5;F8VR82;Q9UPN1;F8VYE8;A0A024RBP2;F8W0W8;P36873	A0A087WYY5	27	36	PPP1CC	Serine/threonine-protein phosphatase;Serine/threonine-protein phosphatase PP1-gamma catalytic subunit	yes	2	0.0028492	109.71	1	24963000
NVVTIFSAPNYCYR	14	0	1645.79	H0YC23;B3KQ51;Q8WZ56;Q6I9T8;Q5U0I7;B3KUN1;B3KRM2;A0A140VJS0;P67775;P62714	H0YC23	93	106	PPP2CB;PPP2CA	Serine/threonine-protein phosphatase;Serine/threonine-protein phosphatase 2A catalytic subunit alpha isoform;Serine/threonine-protein phosphatase 2A catalytic subunit beta isoform	yes	2	4.3499e-05	69.349	1	0
NWQYQETIK	9	0	1208.58	Q15008;B3KT66	Q15008	363	371	PSMD6	26S proteasome non-ATPase regulatory subunit 6	yes	2	0.0098697	84.368	1	203020000
PAASITSKPATLTTTSATSK	20	1	1933.04	Q8N395;J3KS31;B4DQT7;J3QRS9;Q59G94;X6R4W8;O43670	Q8N395	205	224	DKFZp761N202;ZNF207	BUB3-interacting and GLEBS motif-containing protein ZNF207	yes	3	0.0032809	45.608	1	131860000
PDYLGADQR	9	0	1033.48	A0A140VK70;P35998;C9JLS9;B7Z571	A0A140VK70	2	10	PSMC2	26S protease regulatory subunit 7	yes	2	0.019152	94.302	1	358160000
PDYLGADQRK	10	1	1161.58	A0A140VK70;P35998;C9JLS9;B7Z571	A0A140VK70	2	11	PSMC2	26S protease regulatory subunit 7	yes	3	0.035779	42.336	1	23362000
PELAVQK	7	0	783.449	P51665;B2RD27;H3BNT7;H3BTM8;H3BQV2	P51665	2	8	PSMD7	26S proteasome non-ATPase regulatory subunit 7	yes	2	0.038645	114.19	1	168150000
PGHLQEGFGCVVTNR	15	0	1612.78	Q8NC51;Q63HR1;Q5VU21	Q8NC51	2	16	SERBP1;DKFZp686P17171	Plasminogen activator inhibitor 1 RNA-binding protein	yes	2;3	1.3725e-07	140.39	2	0
PGHLQEGFGCVVTNRFDQLFDDESDPFEVLK	31	1	3537.65	Q8NC51;Q63HR1;Q5VU21	Q8NC51	2	32	SERBP1;DKFZp686P17171	Plasminogen activator inhibitor 1 RNA-binding protein	yes	4	0.00035177	46.671	1	0
PGQSPQLLIYR	11	0	1270.7	A0A1W6IYK3	A0A1W6IYK3	45	55			yes	2	2.5245e-10	177.7	1	639050000
PIKPSPPYFGLLLASVGR	18	1	1911.1	P17812;B4E1E0	P17812	533	550	CTPS1	CTP synthase 1;CTP synthase	yes	3	4.7072e-06	65.949	1	23710000
PPKSLIKR	8	2	937.607	A0A2P9ATY7	A0A2P9ATY7	101	108			yes	2	0.021523	54.525	1	170470000
PSETPQAEVGPTGCPHR	17	0	1761.81	P0DN79;P35520;B7Z2D6;C9JMA6	P0DN79	2	18	CBS	Cystathionine beta-synthase	yes	2;3	1.4662e-07	105.2	2	0
PSSLLGAAMPASTSAAALQEALENAGR	27	0	2583.3	E9PF10;A0A024R071;O75694;D6RA13	E9PF10	2	28	NUP155	Nuclear pore complex protein Nup155	yes	3	6.9365e-16	92.275	1	90963000
QAASGLVGQENAR	13	0	1299.65	B5BUB1;Q9Y265	B5BUB1	34	46	RUVBL1	RuvB-like 1	yes	2	3.1123e-22	196.07	1	139750000
QAASSLQQASLK	12	0	1230.66	B7Z4V2;V9HW84;P38646;Q8N1C8;B7Z4T3;A1XP52	B7Z4V2	621	632	HEL-S-124m;HSPA9	Stress-70 protein, mitochondrial	yes	2	0.0031812	63.624	1	2109800000
QADFEAHNILR	11	0	1312.65	B4DUT7;Q53F90;A0A140VJK6;P49915	B4DUT7	539	549	GMPS	GMP synthase [glutamine-hydrolyzing]	yes	2	0.001426	123.21	1	69895000
QAQIEVVPSASALIIK	16	0	1665.97	D3DS95;Q59FI9;P30050	D3DS95	68	83	hCG_21173;RPL12	60S ribosomal protein L12	yes	2	0.0013527	60	1	101650000
QASQGMVGQLAAR	13	0	1315.67	B4DW30;X6R2L4;Q9Y230	B4DW30	41	53	RUVBL2	RuvB-like 2	yes	2	2.0174e-05	88.392	1	98602000
QAVDVSPLR	9	0	983.54	M0R0F0;Q53G25;A0A024R4Q8;M0R0R2;P46782;M0QZN2	M0R0F0	137	145	RPS5	40S ribosomal protein S5;40S ribosomal protein S5, N-terminally processed	yes	2	0.0026111	94.806	1	0
QCVENADLPEGEKKPIDQR	19	2	2168.05	Q99460;B2R6D0;A0A087WW66;Q05CW6;Q05BX4;C9J9M4;H7BZR6	Q99460	111	129	PSMD1	26S proteasome non-ATPase regulatory subunit 1	yes	2;3	1.0212e-08	78.763	2	0
QDVYGPQPQVR	11	0	1285.64	Q96FS1;Q68DU0;C9JZR2;O60716;E9PRE2	Q96FS1	151	161	CTNND1;DKFZp781O2021	Catenin delta-1	yes	2	5.8133e-05	149.65	1	81856000
QEPLLIGSTK	10	0	1084.61	A0A0U1RQF0;P49327	A0A0U1RQF0	317	326	FASN	Fatty acid synthase;[Acyl-carrier-protein] S-acetyltransferase;[Acyl-carrier-protein] S-malonyltransferase;3-oxoacyl-[acyl-carrier-protein] synthase;3-oxoacyl-[acyl-carrier-protein] reductase;3-hydroxyacyl-[acyl-carrier-protein] dehydratase;Enoyl-[acyl-carrier-protein] reductase;Oleoyl-[acyl-carrier-protein] hydrolase	yes	2	0.0030334	85.67	1	0
QEYDESGPSIVHR	13	0	1515.7	Q8WVW5;Q53GK6;Q53G99;Q53G76;Q1KLZ0;P63261;P60709;B4DVQ0;B4DW52;B4E335;B4E3A4;B3KWQ3;Q6PJ43;B7ZAP6;Q96DE1;Q96FU6;V9HVZ7;Q6S8J3;A5A3E0;A0A2R8YFE2;Q9BYX7;P0CG38;L0R5C4;P0CG39	Q8WVW5	348	360	PS1TP5BP1;ACTG1;ACTB;HEL-176;POTEE;POTEF;POTEKP;POTEI;POTEM;POTEJ	Actin, cytoplasmic 2;Actin, cytoplasmic 2, N-terminally processed;Actin, cytoplasmic 1;Actin, cytoplasmic 1, N-terminally processed;POTE ankyrin domain family member E;POTE ankyrin domain family member F;Putative beta-actin-like protein 3;Putative beta-actin-like protein 3, N-terminally processed;POTE ankyrin domain family member I;POTE ankyrin domain family member J	yes	2;3	6.0264e-06	87.568	2	1399200000
QFLFRPWDVTK	11	1	1435.76	A0A024R1A3;P22314;B4DDE4;B4DL67	A0A024R1A3	516	526	UBE1;UBA1	Ubiquitin-like modifier-activating enzyme 1	yes	2	0.021541	85.733	1	47791000
QFQFTDWPEQGVPK	14	0	1705.81	Q59FI2;H0Y6Z7;P10586;H0Y4H1;H0Y7Z9;Q5W9G3;Q7Z3X4;B3KXA8;H0Y380;B4DWI5;B4DK48;Q59H90;Q3KPI9;G8JL96;Q9UM81;F5GWR7;A0A0A0MR60;Q59FX6;Q2HXI4;P23468;Q13332	Q59FI2	1442	1455	PTPRF;LAR;DKFZp686B1310;PTPRD;PTPRS;PTPsigma	Receptor-type tyrosine-protein phosphatase F;Protein-tyrosine-phosphatase;Receptor-type tyrosine-protein phosphatase delta;Receptor-type tyrosine-protein phosphatase S	yes	2	0.00059917	64.73	1	217820000
QGANINEIR	9	0	1013.53	Q53SS8;Q15365	Q53SS8	298	306	PCBP1	Poly(rC)-binding protein 1	yes	2	0.0065557	93.162	1	268290000
QGGGGGGGSVPGIER	15	0	1283.62	Q7KYM9;Q59ES8;A0A087X0X3;P52272;M0R019;M0R2T0;B4DEG4	Q7KYM9	229	243	ORF;HNRNPM	Heterogeneous nuclear ribonucleoprotein M	yes	2	0.00010676	70.412	1	35593000
QGGLGPIR	8	0	796.456	V9HW63;Q13162;H7C3T4;A6NJJ0	V9HW63	166	173	HEL-S-97n;PRDX4	Peroxiredoxin-4	yes	2	0.017696	103.02	1	28822000
QGIETPEDQNDLRK	14	1	1641.8	A0A024R588;A0A024R566;B4DJU4;A0A024R5D9;A0A024R572;Q15637;B4DSE4;B4DX42	A0A024R588	228	241	SF1	Splicing factor 1	yes	2;3	1.7905e-05	66.595	2	136280000
QGRPVVICDKEDTETIK	17	2	1929.98	Q06210	Q06210	631	647	GFPT1	Glutamine--fructose-6-phosphate aminotransferase [isomerizing] 1	yes	3	0.0039431	47.64	1	0
QIFLGGVDKR	10	1	1131.64	Q6NVC0;P05141	Q6NVC0	122	131	SLC25A5	ADP/ATP translocase 2;ADP/ATP translocase 2, N-terminally processed	yes	2;3	0.001143	144.12	2	429810000
QIGTFASVEQFWR	13	0	1567.78	C9JEL3;B9A044;B8ZZ50;Q59FE1;Q53RG0;O60573	C9JEL3	79	91	EIF4E2;tmp_locus_9	Eukaryotic translation initiation factor 4E type 2	yes	2	0.0007297	68.551	1	22243000
QIGVEHVVVYVNK	13	0	1482.82	P49411	P49411	170	182	TUFM	Elongation factor Tu, mitochondrial	yes	3	0.034934	18.73	1	33055000
QIPISDHWSQNLSR	14	0	1679.84	Q6P9C2;B2RAL9;Q99956;Q8N4A4	Q6P9C2	254	267	DUSP9	Dual specificity protein phosphatase;Dual specificity protein phosphatase 9	yes	3	3.4172e-08	86.944	1	0
QIQELVEAIVLPMNHK	16	0	1861.01	R4GNH3;A0A140VK42;P17980;E9PM69;A8K781;E9PMD8;E9PN50	R4GNH3	178	193	PSMC3	26S protease regulatory subunit 6A	yes	3	1.8049e-07	124.81	1	268240000
QITLNDLPVGR	11	0	1224.68	V9HW63;Q13162;H7C3T4	V9HW63	213	223	HEL-S-97n;PRDX4	Peroxiredoxin-4	yes	2	0.00014761	142.04	1	44265000
QITVNDLPVGR	11	0	1210.67	Q06830;A0A0A0MSI0;B2R4P2;A0A0A0MRQ5;B4DF70;V9HW12;P32119	Q06830	141	151	PRDX1;HEL-S-2a;PRDX2	Peroxiredoxin-1;Peroxiredoxin-2	no	2	0.0010791	133.12	1	413470000
QKLHELQEK	9	1	1151.63	F8W696;A0A024R3E3;P02647	F8W696	134	142	APOA1	Apolipoprotein A-I;Proapolipoprotein A-I;Truncated apolipoprotein A-I	yes	2	0.026886	96.027	1	31944000
QLAEDFLR	8	0	990.513	A0A1X7SBZ2;A0A1W2PQ51;Q59F66;Q92841;B4DZQ7	A0A1X7SBZ2	365	372	DDX17	Probable ATP-dependent RNA helicase DDX17	yes	2	0.011073	117.93	1	51876000
QLANMVNNLK	10	0	1143.61	P19474	P19474	68	77	TRIM21	E3 ubiquitin-protein ligase TRIM21	yes	2	0.0046107	106.14	2	311520000
QLFHPEQLITGK	12	0	1409.77	B3KT06;B3KPS3;P68363;A8JZY9;P68366;F8VVB9;F8VQQ4;F8VX09;F8VWV9;F8VRZ4;F8VS66;C9JEV8;C9JQ00;C9JJQ8;C9K0S6;Q6QMJ5;C9JDL2;Q53GA7;F5H5D3;Q9BQE3;B7Z1K5;A0A1W2PQM2;Q8N532	B3KT06	50	61	TUBA1B;TUBA4A;TUBA1A;TUBA1C;TUBA8;TUBA1	Tubulin alpha-1B chain;Tubulin alpha-4A chain;Tubulin alpha-1C chain	no	2;3	0.00074564	153.97	2	645620000
QLFHPEQLITGKEDAANNYAR	21	1	2414.2	B3KT06;B3KPS3;P68363;A8JZY9;P68366;F8VVB9;F8VQQ4;F8VX09;F8VWV9;F8VRZ4;F8VS66;C9JEV8;C9JQ00;C9JJQ8;C9K0S6;Q6QMJ5;C9JDL2;Q53GA7;F5H5D3;Q9BQE3;B7Z1K5;A0A1W2PQM2;Q8N532	B3KT06	50	70	TUBA1B;TUBA4A;TUBA1A;TUBA1C;TUBA8;TUBA1	Tubulin alpha-1B chain;Tubulin alpha-4A chain;Tubulin alpha-1C chain	no	3;4	9.7193e-31	144.51	2	158290000
QLIVGVNK	8	0	869.533	Q6IPT9;Q6IPS9;Q6IPN6;Q53HR5;Q53HQ7;Q53HM9;Q5VTE0;P68104;Q96RE1;A8K9C4;Q53GA1;Q53GE9;Q53G85;Q8IUB0;B4DV42;Q53HR1;Q9NZS6;A0A087WV01;Q9H2I7;Q53G89;A9X7H1;Q16577;A0A2U3TZH3;Q05639;Q59GP5;A0A2R8Y488	Q6IPT9	147	154	EEF1A1;EEF1A1P5;EEF1A1L14;PTI-1;EEF1A2	Elongation factor 1-alpha;Putative elongation factor 1-alpha-like 3;Elongation factor 1-alpha 1;Elongation factor 1-alpha 2	yes	2	0.018323	86.866	1	1330900000
QLQELEKDEREQLR	14	2	1812.93	P19474	P19474	196	209	TRIM21	E3 ubiquitin-protein ligase TRIM21	yes	2;3;4	7.6973e-23	194.7	3	1034900000
QLVTNACLIK	10	0	1101.62	E9PIX6;B4DJ87;E9PKG1;Q99873;Q5U8W9	E9PIX6	198	207	PRMT1;HRMT1L2	Protein arginine N-methyltransferase 1	yes	2	0.0042922	63.419	1	0
QMEKDETVSDCSPHIANIGR	20	1	2229.02	Q7L4N0;B1AK87;B1AK85;B2R7T8;B1AK88;B4DWA6;P47756	Q7L4N0	4	23	CAPZB	F-actin-capping protein subunit beta	yes	3	0.00024427	52.298	1	0
QMQVLHPAAR	10	0	1149.61	B7Z9L0;B7Z2Z8;A8K3C3;P50991	B7Z9L0	24	33	CCT4	T-complex protein 1 subunit delta	yes	2;3	0.0018283	121.62	2	127370000
QMSGAQIK	8	0	861.438	B4DRD7;H3BRU6;F8VZX2;Q15366;F8VRH0;J3QT27;Q5MJP6;E9PFP8;P57721;H3BSS4;Q53SS8;Q15365	B4DRD7	232	239	PCBP2;PCBP3;PCBP1	Poly(rC)-binding protein 2;Poly(rC)-binding protein 3;Poly(rC)-binding protein 1	no	1	0.039906	111.29	1	279230000
QNLFLGSLTSR	11	0	1234.67	Q0VAB1;A0A024R0M6;Q3ZCQ8;M0R0C3;M0R2F8	Q0VAB1	438	448	TIMM50	Mitochondrial import inner membrane translocase subunit TIM50	yes	2	0.00052131	82.645	1	0
QNSVQEQPGTACLSK	15	0	1588.75	B4DSL6;A8K5D9;A0A024RA49;Q9NQW6	B4DSL6	100	114	ANLN	Actin-binding protein anillin	yes	2	0.0010541	56.205	1	0
QPAEHLQLLEEAAK	14	0	1575.83	B1AHB0;P33992;Q53FG5;A8K521;B1AHA9	B1AHB0	91	104	MCM5	DNA helicase;DNA replication licensing factor MCM5	yes	2	0.0089926	52.49	1	0
QQEVVVAGSSLPTSSK	16	0	1615.84	A0A024R3P9;Q9H3P7	A0A024R3P9	307	322	ACBD3	Golgi resident protein GCP60	yes	2	4.009e-07	95.094	1	38001000
QSSGASSSSFSSSR	14	0	1360.59	F6S8Q4;A0A0D9SFB3;A0A2R8YF78;A0A2R8YCW1;A0A0D9SG12;A0A2R8YFR4;A0A2U3TZJ9;A0A2R8YFS5;B5BTY4;A0A2R8Y4A4;Q59GX6;A0A2R8Y645;A0A0D9SF53;O00571;A0A2R8YDT5;A0A2R8Y7T2;A0A2R8Y5G6;Q5S4N1;B4DLU5;A0A0J9YVQ7;A0A087WVZ1	F6S8Q4	571	584	DDX3X	ATP-dependent RNA helicase DDX3X	yes	2	1.5031e-05	86.911	1	150240000
QTLMWSATWPK	11	0	1347.66	A0A1X7SBZ2;A0A1W2PQ51;Q59F66;Q92841;B4DZQ7;J3KRZ1;J3QSF1;B4DN41;J3KTA4;B5BUE6;P17844;Q7Z2V5;Q59E92;B4DNG2	A0A1X7SBZ2	351	361	DDX17;DDX5;DKFZp686J01190	Probable ATP-dependent RNA helicase DDX17;Probable ATP-dependent RNA helicase DDX5	no	2	0.016752	55.064	1	193450000
QTLQSEQPLQVAR	13	0	1496.79	A0A140VK70;P35998;A0A1W2PQS1;Q75L23;C9JLS9;B7Z571	A0A140VK70	85	97	PSMC2	26S protease regulatory subunit 7	yes	2	5.9832e-12	169.76	1	118390000
QTYFLPVIGLVDAEK	15	0	1691.91	R4GNH3;A0A140VK42;P17980;E9PM69;A8K781;E9PKD5;E9PMD8;E9PLG2	R4GNH3	114	128	PSMC3	26S protease regulatory subunit 6A	yes	2	2.5951e-06	81.431	1	235600000
QVIEYAR	7	0	877.466	R4GMR5;V9HW09;P48556;Q5U0B3	R4GMR5	275	281	PSMD8;HEL-S-91n	26S proteasome non-ATPase regulatory subunit 8	yes	2	0.034648	104.11	1	290640000
QVLEPSFR	8	0	974.519	Q53YD7;P26641	Q53YD7	174	181	EEF1G	Elongation factor 1-gamma	yes	2	0.016871	98.997	1	34936000
QVLVAPGNAGTACSEK	16	0	1543.77	Q15374;Q3B7A7;Q59HH3;P22102;C9JZG2;C9JKQ7;C9JBJ1;C9JTV6;F8WD69	Q15374	29	44	GART	Trifunctional purine biosynthetic protein adenosine-3;Phosphoribosylamine--glycine ligase;Phosphoribosylformylglycinamidine cyclo-ligase;Phosphoribosylglycinamide formyltransferase	yes	2	6.6468e-07	111.94	1	0
QVQPEGPYR	9	0	1072.53	A0A0U1RQF0;P49327	A0A0U1RQF0	2293	2301	FASN	Fatty acid synthase;[Acyl-carrier-protein] S-acetyltransferase;[Acyl-carrier-protein] S-malonyltransferase;3-oxoacyl-[acyl-carrier-protein] synthase;3-oxoacyl-[acyl-carrier-protein] reductase;3-hydroxyacyl-[acyl-carrier-protein] dehydratase;Enoyl-[acyl-carrier-protein] reductase;Oleoyl-[acyl-carrier-protein] hydrolase	yes	2	0.0030167	130.04	1	30618000
QVSDLISVLR	10	0	1128.65	B4DN41;J3KTA4;B5BUE6;P17844;B4DNG2	B4DN41	441	450	DDX5	Probable ATP-dependent RNA helicase DDX5	yes	2	0.0023017	95.502	1	42517000
RAAELGAR	8	1	842.472	V9HW90;P00390;A0A2R8YF59;H0YC68	V9HW90	82	89	HEL-75;GSR	Glutathione reductase, mitochondrial	yes	2	0.017664	127.46	1	0
RAFSEADMERPLQELGLVPSAVLIVAK	27	2	2938.59	E9PRQ7;A0A024R598;Q04323;B4E0P8;A0A087WTZ5	E9PRQ7	263	289	UBXN1;LOC51035	UBX domain-containing protein 1	yes	4	1.6356e-05	50.986	1	39959000
RALDLVAAK	9	1	955.581	Q6IBN0;O43242;B3KNN7;Q96N86;B4DV84;B4DEB0;Q8N9M2;H0YGV8	Q6IBN0	201	209	PSMD3	26S proteasome non-ATPase regulatory subunit 3	yes	2	0.010279	113.94	1	92357000
RALSSQHQAR	10	1	1152.61	V9HWB4;P11021	V9HWB4	297	306	HEL-S-89n;HSPA5	78 kDa glucose-regulated protein	yes	2	0.032752	64.654	1	8562000
RAVIILR	7	1	839.571	Q6P6C2	Q6P6C2	277	283	ALKBH5	RNA demethylase ALKBH5	yes	2	0.023811	139.92	1	22107000
RDYDDMSPR	9	1	1153.48	B4DUQ1;A0A024R228;P61978;B4DFF1;Q5EC54;Q5T6W2;B3KU16	B4DUQ1	254	262	HNRPK;HNRNPK	Heterogeneous nuclear ribonucleoprotein K	yes	2	0.0017482	142.92	1	23146000
REDIVDTMVFKPSDVMLVHFR	21	2	2533.28	H3BSQ5;H3BUE3;H3BSK9;A0A024QZC0;A0A024QZB7;A0A024QZ91;H3BUF6;Q8WWM7	H3BSQ5	54	74	ATXN2L	Ataxin-2-like protein	yes	4	6.4981e-13	98.175	1	59637000
RFDAQTGADR	10	1	1135.54	A8K2M0;P43686	A8K2M0	274	283	PSMC4	26S protease regulatory subunit 6B	yes	2	0.0040772	132.88	1	802370000
RFDAQTGADREVQR	14	2	1647.81	A8K2M0;P43686	A8K2M0	274	287	PSMC4	26S protease regulatory subunit 6B	yes	2;3	2.0878e-13	175.29	2	82774000
RFPGYDSESK	10	1	1184.55	A0A2R8Y6J3;B3KTM6;A2RUM7;Q59GX9;P46777	A0A2R8Y6J3	129	138	RPL5	60S ribosomal protein L5	yes	2	0.013842	46.39	1	17855000
RFSEGTSADR	10	1	1124.52	A0A087X2I1;P62333;V9HW24;H0YJX2	A0A087X2I1	256	265	PSMC6;HEL-S-73	26S protease regulatory subunit 10B	yes	2	0.012527	79.986	1	37167000
RGDIIGVQGNPGK	13	1	1309.71	J3KRL2;H3BPV7;H3BVA8;Q15046	J3KRL2	22	34	KARS	Lysine--tRNA ligase	yes	2	0.023733	52.247	1	30553000
RGDINLLMLGDPGTAK	16	1	1669.88	B1AHB0;P33992;Q53FG5;A8K521;B1AHB1;B4DQ39;B3KVF0;B4DVK5;Q59F49	B1AHB0	372	387	MCM5	DNA helicase;DNA replication licensing factor MCM5	yes	2;3	8.04e-07	98.182	2	135550000
RGEDMMHPLK	10	1	1212.57	A0A024R6S1;O60884;T2DN57;A0A087WT48	A0A024R6S1	112	121	DNAJA2	DnaJ homolog subfamily A member 2	yes	3	0.041633	18.816	1	11045000
RGPFELEAFYSDPQGVPYPEAK	22	1	2496.2	A0A024RDQ0;A0A024RDS1;Q92598;B4DY72;B4DF68;A0A0A0MSM0;B4DZB4	A0A024RDQ0	437	458	HSPH1	Heat shock protein 105 kDa	yes	3	0.00022052	51.175	1	70710000
RGVMLAVDAVIAELKK	16	2	1712	A0A024R3X4;P10809;B3GQS7;B7Z4F6;Q53SE2;E7ESH4;E7EXB4	A0A024R3X4	142	157	HSPD1	60 kDa heat shock protein, mitochondrial	yes	3	6.2267e-06	75.376	1	131760000
RIFQIHTSR	9	1	1156.65	Q53XL8;Q53HB3;P62191	Q53XL8	363	371	PSMC1	26S protease regulatory subunit 4	yes	3	0.00517	68.371	1	24600000
RIQEIIEQLDVTTSEYEKEK	20	2	2450.25	A0A024R3X4;P10809;B7Z5E7;B7Z597	A0A024R3X4	370	389	HSPD1	60 kDa heat shock protein, mitochondrial	yes	3	0.00033735	54.15	1	54907000
RISAVSVAER	10	1	1086.61	Q58F26;Q6PJK6;Q08211	Q58F26	447	456	DHX9	ATP-dependent RNA helicase A	yes	2	0.030418	66.19	1	30396000
RKELEQVCNPIISGLYQGAGGPGPGGFGAQGPK	33	2	3281.66	A8K5I0;A0A0G2JIW1;P0DMV9;P0DMV8;A0A1U9X7W4;B4DNT8;Q59EJ3;B4DWK5;B4DI39;B4E1S9;B4DFN9;B4E388;B4DVU9;V9GZ37;B3KTT5;B4E1T6	A8K5I0	596	628	HEL-S-103;HSPA1B;HSPA1A	Heat shock 70 kDa protein 1B;Heat shock 70 kDa protein 1A	yes	4	0.0002533	47.159	1	0
RLDECEEAFQGTK	13	1	1524.69	K7ENH2;B3KQ25;K7ESG5;K9J957;V9HWJ8;Q6FHK7;A0A024R203;P61289;K7EMD0;K7EPX6;K7EKR3	K7ENH2	88	100	PSME3;HEL-S-283	Proteasome activator complex subunit 3	yes	2	7.6227e-06	139.32	1	0
RLDEELEDAEKNLGESEIR	19	2	2244.09	Q15008;B3KT66;C9J0E9;C9J7B7	Q15008	83	101	PSMD6	26S proteasome non-ATPase regulatory subunit 6	yes	3	2.7887e-13	152.71	1	101870000
RLDFDYK	7	1	955.476	M0R0I3;Q9UQD4;Q6FGM0;Q99961;B7Z7W3;Q3V639;Q8IZ09;B7Z7M7;D3DRJ2;B7Z1K6;Q99962;Q3V638;Q7Z376	M0R0I3	130	136	SH3GL1;SH3GL2;DKFZp686B23205	Endophilin-A2;Endophilin-A1	yes	2	0.031368	49.59	1	106410000
RLDFDYKK	8	2	1083.57	M0R0I3;Q9UQD4;Q6FGM0;Q99961;B7Z7W3;Q3V639;Q8IZ09;B7Z7M7;D3DRJ2;B7Z1K6;Q99962;Q3V638;Q7Z376	M0R0I3	130	137	SH3GL1;SH3GL2;DKFZp686B23205	Endophilin-A2;Endophilin-A1	yes	3	0.0006215	95.741	1	0
RLDVFEK	7	1	905.497	Q99460;B2R6D0;A0A087WW66;Q05CW6;Q05BX4;C9J9M4;H7BZR6	Q99460	159	165	PSMD1	26S proteasome non-ATPase regulatory subunit 1	yes	2	0.024329	58.782	1	999310000
RLEAFEHPNVVR	12	1	1465.78	F8VYH9;F8VTV8;F8VWX7;A0A024RBB6;P11802;Q96BE9;F8W1L8;F8VYY1	F8VYH9	62	73	CDK4	Cyclin-dependent kinase 4	yes	3	0.0017557	62.799	1	266940000
RLEELITIFREEATK	15	2	1847.02	A0A0S2Z592;B4DI01;Q53H36;A0A0S2Z5J9;Q96SZ6;H0Y721	A0A0S2Z592	407	421	CDK5RAP1	CDK5 regulatory subunit-associated protein 1	yes	3	0.00020468	63.134	1	24228000
RLLHVAVSDVNDDVR	15	1	1706.91	Q99460;B2R6D0;A0A087WW66;Q05CW6;Q05BX4;H7C378	Q99460	601	615	PSMD1	26S proteasome non-ATPase regulatory subunit 1	yes	3	0.002435	51.695	1	265360000
RLLHVAVSDVNDDVRR	16	2	1863.01	Q99460;B2R6D0;A0A087WW66;Q05CW6;Q05BX4;H7C378	Q99460	601	616	PSMD1	26S proteasome non-ATPase regulatory subunit 1	yes	3;4	6.2473e-07	124.09	2	351680000
RLPDGLTR	8	1	926.53	B1AHB0;P33992;Q53FG5;A8K521;B1AHB1;B4DQ39;B3KVF0;B4DVK5;Q59F49	B1AHB0	364	371	MCM5	DNA helicase;DNA replication licensing factor MCM5	yes	2	0.0075664	135	1	92017000
RLSEDYGVLK	10	1	1178.63	B4DF70;V9HW12;P32119;A6NIW5	B4DF70	110	119	HEL-S-2a;PRDX2	Peroxiredoxin-2	yes	2	0.00090705	144.5	1	82198000
RMEELHNQEMQK	12	1	1571.72	Q9BSV4;Q86VG2;P23246;H0Y9K7	Q9BSV4	475	486	SFPQ	Splicing factor, proline- and glutamine-rich	yes	2	0.0017273	121.83	1	130050000
RMEELHNQEVQK	12	1	1539.75	A8K525;A0A0S2Z4Z9;Q15233;H7C367;C9JYS8	A8K525	325	336	NONO	Non-POU domain-containing octamer-binding protein	yes	2	0.00078591	107.79	1	95506000
RMEELHNQEVQKR	13	2	1695.85	A8K525;A0A0S2Z4Z9;Q15233;H7C367;C9JYS8	A8K525	325	337	NONO	Non-POU domain-containing octamer-binding protein	yes	3	0.0077847	49.483	1	97713000
RNTTIPTK	8	1	929.529	V9HW22;Q53GZ6;P11142;E9PKE3;Q96IS6;B3KTV0;E9PNE6;B4E1Q1;A8K7Q2;E9PS65;Q96BE0;A0A024R6B5;P54652;B3KUS2	V9HW22	416	423	HEL-S-72p;HSPA8;HSPA2	Heat shock cognate 71 kDa protein;Heat shock-related 70 kDa protein 2	yes	2	0.032671	113.14	1	218370000
RPAEDMEEEQAFKR	14	2	1734.8	B4DUQ1;A0A024R228;P61978;B4DFF1;Q5EC54;Q5T6W2;S4R457	B4DUQ1	22	35	HNRPK;HNRNPK	Heterogeneous nuclear ribonucleoprotein K	yes	2;3;4	6.2785e-46	262.15	3	2379400000
RPANQFVPR	9	1	1083.59	A0A1U9X7J2;N0E4C7;Q5SRQ6;P67870	A0A1U9X7J2	175	183	CSNK2B	Casein kinase II subunit beta	yes	2	1.2144e-24	189.53	1	48142000
RPDQQLQGEGK	11	1	1254.63	Q8NC51;Q63HR1;Q5VU21;D3DQ70;D3DQ69	Q8NC51	112	122	SERBP1;DKFZp686P17171	Plasminogen activator inhibitor 1 RNA-binding protein	yes	2;3	0.00023402	107.03	2	2651000000
RPELLTHSTTEVTQPR	16	1	1863.98	X5D2J9;Q499G6;X5D939;X5DNP5;B4DH52;X5DR09;P78347;A0A1W6S962;A8K9W7;B4DRA9	X5D2J9	499	514	GTF2I	General transcription factor II-I	yes	2	9.8307e-07	85.672	1	82953000
RPESFTTPEGPKPR	14	2	1597.82	H7C4H8;Q53XR2;B3KST9;F8W8D3;Q14493	H7C4H8	64	77	SLBP	Histone RNA hairpin-binding protein	yes	3	4.6426e-06	95.98	1	39331000
RPIVACELGR	10	1	1112.61	A2A2L5;B2RB99;B4DXL5;A0A0A0MQR2;Q9BY42;B4DEJ8;A2A2L6	A2A2L5	76	85	RTFDC1	Protein RTF2 homolog	yes	2	0.0041137	63.184	1	0
RPSPDEPMTNLELK	14	1	1625.81	A0A024R3C3;A0A024R394;Q9UHD1;E9PPQ5	A0A024R3C3	89	102	CHORDC1	Cysteine and histidine-rich domain-containing protein 1	yes	2	0.00025269	118.28	1	40611000
RPTPQDSPIFLPVDDTSFR	19	1	2187.1	A0A0U1RQF0;P49327;Q6PJJ3	A0A0U1RQF0	1403	1421	FASN	Fatty acid synthase;[Acyl-carrier-protein] S-acetyltransferase;[Acyl-carrier-protein] S-malonyltransferase;3-oxoacyl-[acyl-carrier-protein] synthase;3-oxoacyl-[acyl-carrier-protein] reductase;3-hydroxyacyl-[acyl-carrier-protein] dehydratase;Enoyl-[acyl-carrier-protein] reductase;Oleoyl-[acyl-carrier-protein] hydrolase	yes	2;3	1.6604e-09	89.011	2	99706000
RQAVDVSPLR	10	1	1139.64	M0R0F0;Q53G25;A0A024R4Q8;M0R0R2;P46782;M0QZN2	M0R0F0	136	145	RPS5	40S ribosomal protein S5;40S ribosomal protein S5, N-terminally processed	yes	2	0.008393	86.882	1	66885000
RQLPVTR	7	1	868.524	A8K0T9;A0A024R0E5;P52907;B4DE01;Q53GE2;Q53GC7;A4D0V4;P47755	A8K0T9	260	266	CAPZA1;CAPZA2	F-actin-capping protein subunit alpha-1;F-actin-capping protein subunit alpha-2	yes	2	0.027834	54.205	1	85629000
RVAAMSVAQR	10	1	1087.59	B4E0S6;O43143	B4E0S6	184	193	DHX15	Pre-mRNA-splicing factor ATP-dependent RNA helicase DHX15	yes	2	0.0038194	109.88	1	126060000
RVAIFIEK	8	1	974.591	A5PLK7;A0A024RAC5;Q9P258	A5PLK7	246	253	RCC2	Protein RCC2	yes	2	0.042275	100.74	1	61109000
RVEHNQSYSQAGITETEWTSGSSK	24	1	2681.23	A0A024RBE7;P42167	A0A024RBE7	216	239	TMPO	Lamina-associated polypeptide 2, isoforms beta/gamma;Thymopoietin;Thymopentin	yes	3	2.3317e-17	141.91	1	112020000
RVHVTQEDFEMAVAK	15	1	1758.87	A0A140VJS3;P62195	A0A140VJS3	375	389	PSMC5	26S protease regulatory subunit 8	yes	2;3	2.7793e-07	144.1	2	403940000
RYDDPEVQKDIK	12	2	1504.75	B7Z4V2;V9HW84;P38646;Q8N1C8;B7Z1V7;D6RJI2	B7Z4V2	113	124	HEL-S-124m;HSPA9	Stress-70 protein, mitochondrial	yes	2	0.026924	37.717	1	50141000
RYTLNVLEDLGDGQK	15	1	1719.88	B4DPW9;Q53GY0;P13797;A0A0A0MSQ0;Q96HI1;B4DG31;B4DI60;A7E2S2	B4DPW9	477	491	PLS3	Plastin-3	yes	2	0.00017011	72.652	1	55878000
SAADLISQAR	10	0	1030.54	Q6DEN2;A0A140VK07;Q8IXW6;Q14195	Q6DEN2	373	382	DPYSL3	Dihydropyrimidinase-related protein 3	yes	2	0.011077	68.456	1	31251000
SAGLAFSLYQAMAK	14	0	1456.74	A0A024R5K8;P50454;B4DN87;A8K259;E9PJH8;E9PIG2;E9PRS3;E9PNX1;E9PK86;E9PMI5;E9PR70;E9PPV6;E9PLA6	A0A024R5K8	47	60	SERPINH1	Serpin H1	yes	2	0.00016428	74.162	1	49899000
SAINEVVTR	9	0	987.535	B8ZZK4;H7C2W9;C9JU56;B7Z4E3;B2R4C1;B7Z4C8;P62899	B8ZZK4	15	23	RPL31	60S ribosomal protein L31	yes	2	0.0062602	101.72	1	41814000
SAKPTKPAASDLPVPAEGVR	20	2	1990.08	B4E3I0;C9J813;Q9NYG1;B4DPW5;E9PGZ1;A0A140VKA0;B7Z6G4;E7EX44;Q05682;Q7Z2Y9	B4E3I0	210	229	CALD1;DKFZp686P03208	Caldesmon	yes	3	0.00043917	51.234	1	191060000
SALSGHLETVILGLLK	16	0	1649.97	V9HW65;A0A024R5Z7;P07355;H0YMD0;H0YMU9;H0YN42;H0YKS4;B4DNH8;A6NMY6;H0YMM1;H0YNP5;H0YM50;H0YKZ7;H0YLV6;H0YMT9;H0YKX9;H0YKL9;H0YMW4	V9HW65	89	104	HEL-S-270;ANXA2;ANXA2P2	Annexin;Annexin A2;Putative annexin A2-like protein	yes	2;3	1.6247e-06	143	2	176270000
SANPAMQLDR	10	0	1101.52	Q9UBV8	Q9UBV8	233	242	PEF1	Peflin	yes	2	0.030503	52.725	1	46654000
SAVGHEYQSK	10	0	1104.52	Q53HG7;Q14247;A0A024R5M3;Q76MU0	Q53HG7	98	107	CTTN;EMS1	Src substrate cortactin	yes	2	0.00028934	146.79	1	53711000
SCDFLSSFR	9	0	1060.46	A0A2R8Y6A7;A0A2R8YD12;A0A024QZX3;A0A024QZX5;A0A087X1N8;P35237	A0A2R8Y6A7	45	53	SERPINB6	Serpin B6	yes	2	0.025003	42.864	1	0
SCKPKPIGK	9	2	956.548	A0A024R652;F5H2F4;B7Z809;P11586	A0A024R652	325	333	MTHFD1	C-1-tetrahydrofolate synthase, cytoplasmic;Methylenetetrahydrofolate dehydrogenase;Methenyltetrahydrofolate cyclohydrolase;Formyltetrahydrofolate synthetase;C-1-tetrahydrofolate synthase, cytoplasmic, N-terminally processed	yes	2	0.032576	48.561	1	0
SDEAVKPFGLK	11	1	1189.63	A0A0U1RQF0;P49327	A0A0U1RQF0	523	533	FASN	Fatty acid synthase;[Acyl-carrier-protein] S-acetyltransferase;[Acyl-carrier-protein] S-malonyltransferase;3-oxoacyl-[acyl-carrier-protein] synthase;3-oxoacyl-[acyl-carrier-protein] reductase;3-hydroxyacyl-[acyl-carrier-protein] dehydratase;Enoyl-[acyl-carrier-protein] reductase;Oleoyl-[acyl-carrier-protein] hydrolase	yes	2	0.00016281	85.161	1	0
SDKPNASDPSVPLK	14	1	1453.74	Q9BQP7;Q5QPE7	Q9BQP7	109	122	MGME1	Mitochondrial genome maintenance exonuclease 1	yes	2	0.02551	54.471	1	53499000
SDMMSHLVK	9	0	1046.49	B1AHB0;P33992;A8K521;B4DQ39;B4DVK5;B1AHA9	B1AHB0	142	150	MCM5	DNA helicase;DNA replication licensing factor MCM5	yes	2	0.024624	67.464	1	256940000
SDPVVSYR	8	0	921.456	P13639;Q8TA90;B4DPU3;Q6W6M8	P13639	573	580	EEF2	Elongation factor 2	yes	2	0.0090858	121.52	1	536360000
SEEAHAEDSVMDHHFR	16	0	1895.79	Q8NC51;Q63HR1;Q5VU21;D3DQ70;D3DQ69	Q8NC51	330	345	SERBP1;DKFZp686P17171	Plasminogen activator inhibitor 1 RNA-binding protein	yes	3;4	1.5086e-09	148.7	2	290670000
SEIIPMFSNLASDEQDSVR	19	0	2137	B3KQV6;Q8NB89;B4DE69;B4DQY1;B4DDF7;A8K7B7;A8K3H8;P30153;C9J9C1	B3KQV6	24	42	PPP2R1A	Serine/threonine-protein phosphatase 2A 65 kDa regulatory subunit A alpha isoform	yes	2	9.4187e-06	68.809	1	33137000
SESWNLKDLDITSPELR	17	1	2002	P19474	P19474	254	270	TRIM21	E3 ubiquitin-protein ligase TRIM21	yes	3	7.1605e-09	89.982	1	168460000
SETELKDTYAR	11	1	1311.63	Q59EG8;Q13200;B4DM22;Q9NSM5;Q13041;H7C1H2	Q59EG8	551	561	PSMD2;DKFZp564A2282	26S proteasome non-ATPase regulatory subunit 2	yes	2;3	3.3143e-05	139.98	2	381000000
SFAGAVSPQEEEEFRR	16	1	1837.86	B1AHB0;P33992;Q53FG5;A8K521;B1AHB1;B4DQ39;B4DVK5	B1AHB0	309	324	MCM5	DNA helicase;DNA replication licensing factor MCM5	yes	3	3.6083e-09	147.35	1	87838000
SFLLDLLNATGK	12	0	1290.72	F6S8Q4;A0A0D9SFB3;A0A2R8YF78;A0A2R8YCW1;A0A0D9SG12;A0A2R8YFR4;A0A2U3TZJ9;A0A2R8YFS5;B5BTY4;A0A2R8Y4A4;Q59GX6;A0A2R8Y645;A0A0D9SF53;O00571;A0A2R8YDT5;A0A2R8Y7T2;A0A2R8Y5G6;Q5S4N1;A0A2R8YDH3;A0A0J9YVQ7	F6S8Q4	396	407	DDX3X	ATP-dependent RNA helicase DDX3X	yes	2	0.00069753	120.45	1	104240000
SFQQSSLSR	9	0	1038.51	D6RB45;A0A1B0GX04;D6R9F3;D6RBS2;D6RCM3;D6REK4;D6R8Z5;Q68E03;D6R991;D6REM6;Q68D11;A0A0R4J2E8;A8MXP9;P43243	D6RB45	4	12	MATR3;DKFZp686L22104;DKFZp686K23100	Matrin-3	yes	2	0.00062369	99.139	1	0
SFYPEEVSSMVLTK	14	0	1615.78	V9HW22;Q53GZ6;P11142;E9PKE3;Q96IS6;B3KTV0;Q53HF2;E9PN89;E9PQQ4;E9PQK7;E9PK54;E9PLF4;B4DTX2;E9PPY6;E9PI65;E9PN25	V9HW22	113	126	HEL-S-72p;HSPA8	Heat shock cognate 71 kDa protein	yes	2	1.3755e-05	100.55	1	986290000
SGAPVLSLLSVR	12	0	1197.71	A0A024R5N4;F5H0C4;Q9BRP4	A0A024R5N4	304	315	WDR71;PAAF1	Proteasomal ATPase-associated factor 1	yes	2	0.00038959	135.55	1	141610000
SGAVEETFR	9	0	994.472	B4E136;Q6YN16;B2R923;A0A024R159;B4DWC7	B4E136	187	195	HSDL2	Hydroxysteroid dehydrogenase-like protein 2	yes	2	0.0057036	105.57	1	67263000
SGDAAIVDMVPGKPMCVESFSDYPPLGR	28	1	2937.37	Q6IPT9;Q6IPS9;Q6IPN6;Q53HR5;Q53HQ7;Q53HM9;Q5VTE0;P68104;Q96RE1;A0A087WVQ9;A8K9C4;Q53GA1;Q53GE9;Q53G85;Q8IUB0;B4DNE0;B4DV42;Q504Z0;Q53HR1;Q9NZS6;Q53G89;Q96C29;Q8TBL1;Q6P082;Q96CD8;Q6P4C9;B4E2C5;Q2F837;Q96EB3	Q6IPT9	396	423	EEF1A1;EEF1A1P5;EEF1A1L14	Elongation factor 1-alpha;Putative elongation factor 1-alpha-like 3;Elongation factor 1-alpha 1	yes	2;3	6.8952e-18	116.86	2	0
SGGASHSELIHNLR	14	0	1476.74	H7C4X2;F8WDT3;F8WAV5;F8WAX2;B7Z972;F6S8N6;A0A0A0MRJ6;H7BY58;P22061	H7C4X2	34	47	PCMT1	Protein-L-isoaspartate O-methyltransferase;Protein-L-isoaspartate(D-aspartate) O-methyltransferase	yes	2;3	0.0051932	75.387	2	18702000
SGMVQTEAQYR	11	0	1268.58	A0A0U1RRI0;Q06124	A0A0U1RRI0	173	183	PTPN11	Tyrosine-protein phosphatase non-receptor type 11	yes	2	0.0010795	84.213	1	32855000
SGNYPSSLSNETDR	14	0	1525.66	B4DWZ7;B3KTN5;Q9NS86	B4DWZ7	285	298	LANCL2	LanC-like protein 2	yes	2	0.00033366	70.488	1	232450000
SGPFGQIFRPDNFVFGQSGAGNNWAK	26	1	2797.34	B4DE77;P04350;B4DJ43;M0QY85;M0QZL7;M0R278;M0R1I1;B7ZAF0;Q5JP53;Q5SU16;P07437;Q5ST81;Q6LC01;B4DY90;B7ZAK1;B4DQN9;B2R6L0;B4DMJ5;A5D907;A5D906;A1L195;Q8IZ29;Q8IWP6;P68371;Q8N6N5;Q9BVA1;Q13885;A0A024QZU2	B7ZAF0	49	74	TUBB4A;TUBB;TUBB2A;TUBB2B;TUBB2C;TUBB4B	Tubulin beta-4A chain;Tubulin beta chain;Tubulin beta-4B chain;Tubulin beta-2B chain;Tubulin beta-2A chain	no	3	6.0822e-08	70.316	1	264540000
SGVSLAALKK	10	1	972.597	Q4VB24;B2R984;A3R0T8;A3R0T7;P16403;P10412;P16402	Q4VB24	55	64	HIST1H1E;HIST1H1C;HIST1H1D	Histone H1.2;Histone H1.4;Histone H1.3	yes	2	0.0098221	84.498	1	127320000
SHGFAAEFK	9	0	992.472	A0A024DAK3;Q59EC0;P55265;D3DV75;B7Z8Y3;H0YCK3	A0A024DAK3	737	745	ADAR	Double-stranded RNA-specific adenosine deaminase	yes	2	0.024828	67.277	1	65454000
SHIEIIR	7	0	866.497	V9HW90;P00390;Q03504	V9HW90	165	171	HEL-75;GSR	Glutathione reductase, mitochondrial	yes	2	0.029628	94.777	1	176920000
SHLLNCCPHDVLSGTR	16	0	1750.82	Q9Y383;A0A0A6YYJ8	Q9Y383	38	53	LUC7L2	Putative RNA-binding protein Luc7-like 2	yes	3	7.4115e-10	151.38	1	0
SHLVHGSSPGVMGTSVATSASK	22	0	2096.03	H0YF36;A0A0A0MSW3;A0A024R8B6;P35658	H0YF36	36	57	NUP214	Nuclear pore complex protein Nup214	yes	3	0.013307	33.747	1	12239000
SHQLIHAASLK	11	0	1203.67	Q96H79	Q96H79	210	220	ZC3HAV1L	Zinc finger CCCH-type antiviral protein 1-like	yes	2	0.0042567	66.056	1	0
SIIGVIPYFPYSK	13	0	1482.81	C9JDH0;E7EW35;C9JDU5;C9JJS3;C9K0K7;E7EPA1;B2R7R5;A0A024QYY3;O60256	C9JDH0	103	115	PRPSAP2	Phosphoribosyl pyrophosphate synthase-associated protein 2	yes	2	0.00042711	72.434	1	26013000
SILSPGGSCGPIK	13	0	1214.63	X5D2J9;Q499G6;X5D939;X5DNP5;B4DH52;X5DR09;P78347;A0A1W6S962;A8K9W7;X5D7Q9	X5D2J9	207	219	GTF2I	General transcription factor II-I	yes	2	5.8002e-09	110.38	1	0
SINPDEAVAYGAAVQAAILSGDK	23	0	2259.14	V9HW22;Q53GZ6;P11142;E9PKE3;Q96IS6;B3KTV0;Q53HF2;E9PNE6;B4E1Q1;A8K7Q2	V9HW22	362	384	HEL-S-72p;HSPA8	Heat shock cognate 71 kDa protein	yes	2;3	8.2296e-05	52.522	2	169590000
SIQFVDWCPTGFK	13	0	1526.72	B3KT06;B3KPS3;P68363;A8JZY9;P68366;B4DDU2	B3KT06	305	317	TUBA1B;TUBA4A	Tubulin alpha-1B chain;Tubulin alpha-4A chain	yes	2	6.5339e-05	115.18	1	0
SIRPDNMSEYSK	12	1	1425.66	E5RFI6;E5RJ04;E5RGV4;E5RHE7;E5RH52;E5RG37;E5RFP9;H3BM24;B7Z3S4;Q5TEE2;B4DSK9;B3KUJ5;Q6IT96;B5BU61;Q13547;Q92769	E5RFI6	49	60	HDAC2;HDAC1	Histone deacetylase;Histone deacetylase 1;Histone deacetylase 2	yes	2;3	0.0032055	78.136	2	74607000
SKSEEAHAEDSVMDHHFR	18	1	2110.91	Q8NC51;Q63HR1;Q5VU21;D3DQ70;D3DQ69	Q8NC51	328	345	SERBP1;DKFZp686P17171	Plasminogen activator inhibitor 1 RNA-binding protein	yes	2;3;4;5	1.4905e-09	132.86	4	1959200000
SLAPSIHGHDYVK	13	0	1422.73	Q53HJ4;B2R7C5;A0A0S2Z4T1;P25205;Q8NHX6;B4DUQ9;J3KQ69;A0A0S2Z492;B4DS46	Q53HJ4	302	314	MCM3;HCC5	DNA helicase;DNA replication licensing factor MCM3	yes	2;3	0.013568	56.548	2	262670000
SLATRTDQDSR	11	1	1248.61	B1AJY5;B1AJY6;O75832	O75832	31	41	PSMD10	26S proteasome non-ATPase regulatory subunit 10	no	2;3	0.0010412	166.09	2	403550000
SLDQDPVVR	9	0	1027.53	A0A024RDQ0;A0A024RDS1;Q92598;B4DY72;B4DF68;A0A0A0MSM0;Q5TBM3	A0A024RDQ0	729	737	HSPH1	Heat shock protein 105 kDa	yes	2	0.028977	63.565	1	98002000
SLEQNIQLPAALLSR	15	0	1651.93	B2RBA6;A0A0S2Z4A5;P33993;Q9H4N9;B3KUD7;B4DDF5;C6EMX8	B2RBA6	500	514	MCM7	DNA helicase;DNA replication licensing factor MCM7	yes	2	1.3969e-09	95.401	1	0
SLESTTLTEK	10	0	1107.57	F8VQR7;A0A024RBB5;Q16527;F8VW96	F8VQR7	152	161	CSRP2	Cysteine and glycine-rich protein 2	yes	2	0.018623	73.233	1	0
SLIEEGGDWDRR	12	1	1431.67	Q15008;B3KT66;C9J0E9;H7C531	Q15008	166	177	PSMD6	26S proteasome non-ATPase regulatory subunit 6	yes	3	0.00020254	134.2	1	50724000
SLKEEGVQR	9	1	1044.56	P40222	P40222	254	262	TXLNA	Alpha-taxilin	yes	2	0.027788	89.752	1	14619000
SLLVIPNTLAVNAAQDSTDLVAK	23	0	2352.29	P17987;F5H282;E7EQR6	P17987	444	466	TCP1	T-complex protein 1 subunit alpha	yes	2	0.00015668	58.21	1	105700000
SLLVNPEGPTLMR	13	0	1425.77	A0A0U1RQF0;P49327	A0A0U1RQF0	2219	2231	FASN	Fatty acid synthase;[Acyl-carrier-protein] S-acetyltransferase;[Acyl-carrier-protein] S-malonyltransferase;3-oxoacyl-[acyl-carrier-protein] synthase;3-oxoacyl-[acyl-carrier-protein] reductase;3-hydroxyacyl-[acyl-carrier-protein] dehydratase;Enoyl-[acyl-carrier-protein] reductase;Oleoyl-[acyl-carrier-protein] hydrolase	yes	2	0.00012126	129.85	1	54505000
SLPGYMTR	8	0	923.453	A0A087WZN1;O43837;A0A087X2E5;L0R875	A0A087WZN1	147	154	IDH3B	Isocitrate dehydrogenase [NAD] subunit, mitochondrial;Isocitrate dehydrogenase [NAD] subunit beta, mitochondrial	yes	2	0.0044732	130.77	1	108840000
SLTLVFEYLDKDLK	14	1	1682.91	F5H6Z0;B4DGP5;A0A024RBH0;Q00537;B7Z461;Q6ZMU4;E5RGN0;Q96GA5;Q9BRL4;A0A087WZU2;A0A140VK97;A0A024R183;Q59FJ5;B7Z8T0;Q00536	F5H6Z0	209	222	CDK17;PCTK2;CDK16;PCTK1	Cyclin-dependent kinase 17;Cyclin-dependent kinase 16	yes	3	0.0014589	55.656	1	29939000
SLVASLAEPDFVVTDFAK	18	0	1907.99	A0A024R1A3;P22314	A0A024R1A3	305	322	UBE1;UBA1	Ubiquitin-like modifier-activating enzyme 1	yes	2	2.5248e-08	80.31	1	142220000
SLVSVTK	7	0	732.438	B4DMA2;B4DGL0;A0A024RD80;P08238;Q9H6X9;A8K3W9;Q58FF7;Q58FF8	B4DMA2	494	500	HSP90AB1;HSP90AB3P;HSP90AB2P	Heat shock protein HSP 90-beta;Putative heat shock protein HSP 90-beta-3;Putative heat shock protein HSP 90-beta 2	yes	2	0.02942	94.407	1	18318000
SLYYYIQQDTK	11	0	1420.69	V9HW65;A0A024R5Z7;P07355;B4DNH8;A6NMY6	V9HW65	314	324	HEL-S-270;ANXA2;ANXA2P2	Annexin;Annexin A2;Putative annexin A2-like protein	yes	2	0.00026388	100.02	1	53699000
SMQNHAAVFR	10	0	1159.56	B3KT34;A0A024QZ30;P31040;A0A087X1I3;Q0QF12;B3KYA5;B4DYN5	B3KT34	293	302	SDHA	Succinate dehydrogenase [ubiquinone] flavoprotein subunit, mitochondrial	yes	2	0.0018862	122.52	1	133130000
SMQPGTSLAK	10	0	1018.51	Q7L0Y3	Q7L0Y3	316	325	TRMT10C	Mitochondrial ribonuclease P protein 1	yes	2	0.024598	56.659	1	65751000
SMVPVQVQLDVPVVK	15	0	1636.92	C9JRH2;C9JMJ4;C9J3R0;C9JQZ4;C9JW69;Q5T081;A0A0S2Z3I4;A0A0S2Z404;P18754	C9JRH2	162	176	RCC1	Regulator of chromosome condensation	yes	2	0.00016259	67.022	1	48353000
SNCKPSTFAYPAPLEVPKEK	20	2	2205.11	Q99460;B2R6D0;A0A087WW66;Q05CW6	Q99460	804	823	PSMD1	26S proteasome non-ATPase regulatory subunit 1	yes	4	1.0055e-06	70.538	1	0
SNDEEAFTFAR	11	0	1285.56	P0DN79;P35520;B7Z2D6;B7Z6W5	P0DN79	326	336	CBS	Cystathionine beta-synthase	yes	2	2.9226e-05	152.11	1	33444000
SNEILTAIIQGMR	13	0	1444.77	B7Z5M1;J3KTM9;B2RBR9;Q14974;B7Z752;J3QRG4	B7Z5M1	25	37	KPNB1	Importin subunit beta-1	yes	2	9.5422e-08	93.096	1	0
SNNVEMDWVLK	11	0	1333.63	E9PCY7;G8JLB6;P31943;D6RIT2;D6RIU0;D6RBM0;E7EQJ0;D6RAM1;E5RGV0;D6R9T0;D6RFM3;D6RDU3;D6RJ04;D6RIH9;E5RGH4;H0YAQ2	E9PCY7	88	98	HNRNPH1	Heterogeneous nuclear ribonucleoprotein H;Heterogeneous nuclear ribonucleoprotein H, N-terminally processed	yes	2	0.0072384	62.463	1	54593000
SNTGGQAFPQCVFDHWQILPGDPFDNSSRPSQVVAETR	38	1	4186.96	P13639;Q8TA90;B4DPU3	P13639	802	839	EEF2	Elongation factor 2	yes	4	7.4755e-07	51.544	1	0
SPVESTTEPPAVR	13	0	1368.69	B4DSN3;G5EA31;A0A024QZM6;P53992;B7ZAY6	B4DSN3	838	850	SEC24C	Protein transport protein Sec24C	yes	2	9.2255e-05	132.78	1	116750000
SQCLQVPER	9	0	1058.52	U3KQA4;K7ESF4;Q9BRP1	U3KQA4	93	101	PDCD2L	Programmed cell death protein 2-like	yes	2	0.026695	64.04	1	0
SQIFSTASDNQPTVTIK	17	0	1835.93	V9HWB4;P11021	V9HWB4	448	464	HEL-S-89n;HSPA5	78 kDa glucose-regulated protein	yes	2	0.043264	40.287	1	48850000
SQIHDIVLVGGSTR	14	0	1480.8	V9HW22;Q53GZ6;P11142;E9PKE3;Q96IS6;B3KTV0;Q53HF2;E9PNE6;E9PN89;B4E1Q1;A8K7Q2	V9HW22	329	342	HEL-S-72p;HSPA8	Heat shock cognate 71 kDa protein	yes	2;3	1.8057e-29	208.74	2	244130000
SQSAAVTPSSTTSSTR	16	0	1566.75	Q16186;Q68E00;A0A087WX59	Q16186	211	226	ADRM1;DKFZp686G2045	Proteasomal ubiquitin receptor ADRM1	yes	2	7.0761e-07	128.54	1	116810000
SQVVAGTNYFIK	12	0	1325.7	Q76LA1;P04080;A0A1W2PS52	Q76LA1	45	56	CSTB	Cystatin-B	yes	2	0.00053823	75.509	1	0
SRNTDEMVELR	11	1	1348.64	B4DUQ1;A0A024R228;P61978;B4DFF1;Q5EC54;Q5T6W2;S4R457	B4DUQ1	36	46	HNRPK;HNRNPK	Heterogeneous nuclear ribonucleoprotein K	yes	2;3	0.0032659	84.479	2	434740000
SRPIASILEEVKK	13	2	1468.86	A0A0S2Z592;B4DI01;Q53H36;A0A0S2Z5J9;Q96SZ6	A0A0S2Z592	276	288	CDK5RAP1	CDK5 regulatory subunit-associated protein 1	yes	3	0.017753	45.334	1	43543000
SSDEAVILCK	10	0	1063.52	A0A024R201;J3KNQ3;Q53GN6;Q9Y6E3;Q9UNM6;B2RBM7;A0A087WUL9;B4DJ66;E9PL38;H0YD73	A0A024R201	106	115	PSMD13	26S proteasome non-ATPase regulatory subunit 13	yes	2	0.0013494	82.426	1	0
SSFSHYSGLK	10	0	1111.53	Q8NC51	Q8NC51	202	211	SERBP1	Plasminogen activator inhibitor 1 RNA-binding protein	yes	3	0.020333	40.883	1	91019000
SSILAGGQPR	10	0	984.535	Q9BYB4;C9JPQ6	Q9BYB4	118	127	GNB1L	Guanine nucleotide-binding protein subunit beta-like protein 1	yes	2	0.0056515	77.923	1	54663000
SSPATADKR	9	1	931.472	Q6ZVL3;B4E244;B3KY47;A0A2R8Y5P9;Q8TF72	Q6ZVL3	753	761	SHROOM3	Protein Shroom3	yes	2	0.016976	89.142	1	210330000
SSQSSSQQFSGIGR	14	0	1454.67	A0A1X7SBZ2;A0A1W2PQ51;Q59F66;Q92841;Q9UQL5	A0A1X7SBZ2	671	684	DDX17	Probable ATP-dependent RNA helicase DDX17	yes	2	5.8892e-17	186.95	1	851010000
SSTPLPTISSSAENTR	16	0	1646.81	A0A024RBE7;P42167;H0YJH7;A0A024RBH7;Q59G12;G5E972;P42166	A0A024RBE7	158	173	TMPO	Lamina-associated polypeptide 2, isoforms beta/gamma;Thymopoietin;Thymopentin;Lamina-associated polypeptide 2, isoform alpha;Thymopoietin;Thymopentin	yes	2	1.3031e-05	75.479	1	98575000
SSTTSMTSVPKPLK	14	1	1462.77	Q59EG8;Q13200;B4DM22;Q9NSM5;H7C2Q3;C9JPC0	Q59EG8	89	102	PSMD2;DKFZp564A2282	26S proteasome non-ATPase regulatory subunit 2	yes	2;3	0.00056973	68.355	2	1625000000
STAGDTHLGGEDFDNR	16	0	1690.72	V9HW22;Q53GZ6;P11142;E9PKE3;Q96IS6;B3KTV0;Q53HF2;E9PN89;A0A024R6B5;P54652	V9HW22	221	236	HEL-S-72p;HSPA8;HSPA2	Heat shock cognate 71 kDa protein;Heat shock-related 70 kDa protein 2	yes	2	2.6622e-07	87.184	1	49035000
STGEAFVQFASQEIAEK	17	0	1840.88	E9PCY7;G8JLB6;P31943;D6RIU0;D6RBM0;E5RGV0;E7EN40;H0YB39;E5RGH4;P55795;B4DFK9	E9PCY7	151	167	HNRNPH1;HNRNPH2	Heterogeneous nuclear ribonucleoprotein H;Heterogeneous nuclear ribonucleoprotein H, N-terminally processed;Heterogeneous nuclear ribonucleoprotein H2	no	2	6.0331e-07	107.17	1	189530000
STHQAAIVSK	10	0	1040.56	B4E3I0;C9J813;Q9NYG1;B4DPW5;E9PGZ1;A0A140VKA0;B7Z6G4;E7EX44;Q05682	B4E3I0	184	193	CALD1	Caldesmon	yes	2	7.6512e-05	111.61	1	0
STLTDSLVCK	10	0	1065.54	P13639;Q6PK56;B4DPU3;B4DRE8;B4DMC6	P13639	33	42	EEF2	Elongation factor 2	yes	2	0.0041789	63.673	1	0
STNGDTFLGGEDFDQALLR	19	0	2054.95	B7Z4V2;V9HW84;P38646;Q8N1C8;B7Z1V7;B7Z4T3;Q2F839	B7Z4V2	252	270	HEL-S-124m;HSPA9	Stress-70 protein, mitochondrial	yes	2	0.0053204	49.31	1	68137000
STSIQSFK	8	0	896.46	B4DPW9;Q53GY0;P13797;A0A0A0MSQ0;Q96HI1;B4DG31;B4DI60;A7E2S2	B4DPW9	511	518	PLS3	Plastin-3	yes	2	0.036109	75.189	1	204880000
STTTGHLIYK	10	0	1119.59	Q6IPT9;Q6IPS9;Q6IPN6;Q53HR5;Q53HQ7;Q53HM9;Q5VTE0;P68104;A0A087WVQ9;Q53GA1;Q53GE9;Q53G85;B4DNE0;A0A087WV01;Q9H2I7;A0A2U3TZH3;Q05639;A6PW80;Q5JR01;A0A2R8Y488;Q6NS35;A0A2R8YDN5;Q6NSH7;A0A2R8Y660	Q6IPT9	21	30	EEF1A1;EEF1A1P5;EEF1A2	Elongation factor 1-alpha;Putative elongation factor 1-alpha-like 3;Elongation factor 1-alpha 1;Elongation factor 1-alpha 2	yes	2;3	0.0092548	60.019	2	1281600000
STVHEILCK	9	0	1028.53	V9HW65;A0A024R5Z7;P07355;H0YMD0;H0YMU9;H0YN42;H0YKS4;B4DNH8;A6NMY6;H0YMM1;H0YNP5;H0YKZ7;H0YLV6;H0YMT9;H0YKX9;H0YKL9;H0YMD9;H0YKV8;H0YNB8;H0YKN4	V9HW65	2	10	HEL-S-270;ANXA2;ANXA2P2	Annexin;Annexin A2;Putative annexin A2-like protein	yes	2	0.00023519	145.34	1	0
STVVPVPYEK	10	0	1117.6	X5D2J9;Q499G6;X5D939;X5DNP5;B4DH52;X5DR09;P78347;A0A1W6S962;A8K9W7;X5D7Q9;A0A0A0VEB4	X5D2J9	131	140	GTF2I;GTF2I-RARA	General transcription factor II-I	yes	2	0.013412	64.711	1	64319000
SVCHVPGLKK	10	1	1066.6	P19474	P19474	271	280	TRIM21	E3 ubiquitin-protein ligase TRIM21	yes	2	0.0049276	77.072	1	0
SVCTEAGMFAIR	12	0	1283.6	A0A140VK70;P35998;A0A1W2PQS1;Q75L23	A0A140VK70	387	398	PSMC2	26S protease regulatory subunit 7	yes	2	8.7783e-05	107.15	1	0
SVFPEQANNNEWAR	14	0	1660.76	Q6IBN0;O43242;B3KNN7;Q96N86;B4DV84;B4DEB0;B4DPM7;Q8N9M2	Q6IBN0	274	287	PSMD3	26S proteasome non-ATPase regulatory subunit 3	yes	2	3.9922e-10	166.97	1	90435000
SVHYCPATK	9	0	1004.48	Q53HJ4;B2R7C5;A0A0S2Z4T1;P25205;Q8NHX6;B4DUQ9;J3KQ69;A0A0S2Z492;B4DS46	Q53HJ4	144	152	MCM3;HCC5	DNA helicase;DNA replication licensing factor MCM3	yes	2	0.0011988	114.99	1	0
SVIGHLQTK	9	0	981.561	A0A087WZN1;O43837;A0A0D9SG66;Q9UIC5	A0A087WZN1	375	383	IDH3B	Isocitrate dehydrogenase [NAD] subunit, mitochondrial;Isocitrate dehydrogenase [NAD] subunit beta, mitochondrial	yes	2	0.0096421	84.743	1	591620000
SVVALHNLINNK	12	0	1320.75	P51665;B2RD27;B4DXI8	P51665	268	279	PSMD7	26S proteasome non-ATPase regulatory subunit 7	yes	3	0.00010626	62.633	1	40461000
SVVCQESDLPDELLYGR	17	0	1921.91	B4DWZ7;B3KTN5;Q9NS86	B4DWZ7	166	182	LANCL2	LanC-like protein 2	yes	2	1.9051e-07	107.85	1	0
SWMEGLTLQDYSEHCK	16	0	1925.83	A0A140VKF2;O00487;Q53TH1;Q59G89;Q96DE8	A0A140VKF2	224	239	PSMD14	26S proteasome non-ATPase regulatory subunit 14	yes	2	2.8719e-05	67.153	1	0
SYELPDGQVITIGNER	16	0	1789.88	Q8WVW5;Q53GK6;Q53G99;Q53G76;Q1KLZ0;P63261;P60709;B4DVQ0;B4DW52;B4E335;B4E3A4;A0A2R8Y793;B3KWQ3;Q6PJ43;B7ZAP6;Q96DE1;Q96FU6;V9HVZ7;F1BXA6;A4UCT3;A5GZ75;B3KUD3;Q562R1;Q6S8J3;A5A3E0;A0A2R8YEA7;B3KPP5;Q9BYX7;A0A173GMX0;K4EQ44;K4EP00;K4ENJ5;G8FSY7;B7Z6P1;A8K3K1;P68133;P68032;D2JYH4;P63267;P62736;Q13707;B3KW67;B4DUI8	Q8WVW5	227	242	PS1TP5BP1;ACTG1;ACTB;HEL-176;ACTBL2;POTEE;POTEF;POTEKP;ACTA1;ACTC1;ACTA2;ACTG2	Actin, cytoplasmic 2;Actin, cytoplasmic 2, N-terminally processed;Actin, cytoplasmic 1;Actin, cytoplasmic 1, N-terminally processed;Beta-actin-like protein 2;POTE ankyrin domain family member E;POTE ankyrin domain family member F;Putative beta-actin-like protein 3;Putative beta-actin-like protein 3, N-terminally processed;Actin, alpha skeletal muscle;Actin, alpha cardiac muscle 1;Actin, gamma-ent…	no	2	1.2175e-06	104.87	1	910540000
SYSSGGEDGYVR	12	0	1275.54	Q9P1D9;Q5U0F4;Q53HU7;Q13347	Q9P1D9	47	58	EIF3I	Eukaryotic translation initiation factor 3 subunit I	yes	2	5.5224e-08	166.33	1	40229000
TAAFLLPILSQIYSDGPGEALR	22	0	2331.25	F6S8Q4;A0A0D9SFB3;A0A2R8YF78;A0A2R8YCW1;A0A0D9SG12;A0A2R8YFR4;A0A2U3TZJ9;A0A2R8YFS5;B5BTY4;A0A2R8Y4A4;Q59GX6;A0A2R8Y645;A0A0D9SF53;O00571;A0A2R8YDT5;A0A2R8Y7T2;A0A2R8Y5G6;A0A2R8YDH3;B4DLU5	F6S8Q4	231	252	DDX3X	ATP-dependent RNA helicase DDX3X	yes	2	1.6809e-12	95.264	1	115900000
TAATLATHELR	11	0	1182.64	A0A024R4G1;Q8N1G4	A0A024R4G1	371	381	LRRC47	Leucine-rich repeat-containing protein 47	yes	3	0.018096	43.544	1	0
TAFQEALDAAGDK	13	0	1335.63	H9ZYJ2;P10599	H9ZYJ2	9	21	TXN	Thioredoxin	yes	2	8.4954e-05	78.653	1	184370000
TAIHEVMEQGR	11	0	1269.61	Q53HJ4;B2R7C5;A0A0S2Z4T1;P25205;Q8NHX6;B4DUQ9;J3KQ69;A0A0S2Z492;B4DS46	Q53HJ4	420	430	MCM3;HCC5	DNA helicase;DNA replication licensing factor MCM3	yes	2	0.0012557	117.53	1	513620000
TAIHTAAMDMLGGPGIESQCR	21	0	2158	B4E136;Q6YN16;B2R923;A0A024R159	B4E136	79	99	HSDL2	Hydroxysteroid dehydrogenase-like protein 2	yes	2;3	2.121e-14	132.9	2	0
TALHWACSAGHTEIVEFLLQLGVPVNDKDDAASK	34	1	3634.81	B1AJY5;B1AJY6	B1AJY5	42	75	PSMD10		yes	3;4;5;6	4.7484e-20	91.398	7	0
TAPDLLPHKPLPASAYIEDGRFDLSMPHVQDPSLVR	36	2	3982.04	Q59FI2;H0Y6Z7;P10586;H0Y4H1;H0Y7Z9;Q5W9G3;Q7Z3X4;B3KWM1;B3KXA8;H0Y380	Q59FI2	740	775	PTPRF;LAR;DKFZp686B1310	Receptor-type tyrosine-protein phosphatase F;Protein-tyrosine-phosphatase	yes	5	0.023233	25.457	1	104940000
TATESFASDPILYRPVAVALDTK	23	1	2464.28	H3BTN5;V9HWB8;A0A024R5Z9;P14618;H3BT25;H3BUW1;H3BTJ2;H3BQ34;A0A024R609	H3BTN5	93	115	PKM;HEL-S-30;PKM2	Pyruvate kinase;Pyruvate kinase PKM	yes	3	0.0040271	37.896	1	96823000
TAVAPIER	8	0	855.481	A8K787;A0A0S2Z3H3;P12235;A0A0S2Z359;V9GYG0;Q9H0C2;Q6NVC0;P05141;Q6I9V5;P12236;Q59EI9	Q6NVC0	49	56	SLC25A4;SLC25A31;SLC25A5;SLC25A6	ADP/ATP translocase 1;ADP/ATP translocase 4;ADP/ATP translocase 4, N-terminally processed;ADP/ATP translocase 2;ADP/ATP translocase 2, N-terminally processed;ADP/ATP translocase 3;ADP/ATP translocase 3, N-terminally processed	no	2	0.01032	119.29	1	398960000
TAVCDIPPR	9	0	970.491	B4DE77;P04350;B4DJ43;B4DFH6;Q3ZCM7;B7ZAF0;Q5JP53;Q5SU16;P07437;Q5ST81;Q6LC01;B4DY90;B7ZAK1;Q9BUU9;B4E052;B4DQN9;B2R6L0;Q96B85;B4DXZ5;B4DMU8;B4DMJ5;Q6P602;A0A075B736;Q5SQY0;A6NNZ2;Q8IZ29;Q8IWP6;P68371;Q8N6N5;B3KML9;Q96HX0;A4UCT2;Q9BVA1;Q13885;A0A024QZU2;O43209;B7Z4N1;Q9UGA2	B7ZAF0	322	330	TUBB4A;TUBB8;TUBB;TUBB2C;TUBB4B;TUBB2B;TUBB2A;DKFZp566F223	Tubulin beta-4A chain;Tubulin beta-8 chain;Tubulin beta chain;Tubulin beta-8 chain-like protein LOC260334;Tubulin beta-4B chain;Tubulin beta-2B chain;Tubulin beta-2A chain	no	2	0.0019156	96.253	2	0
TAWGQQPDLAANEAQLLR	18	0	1981	A0A024R201;J3KNQ3;Q53GN6;Q9Y6E3;Q9UNM6;B2RBM7;A0A087WUL9;B4DJ66;E9PL38;H0YD73;Q9UNM7	A0A024R201	253	270	PSMD13	26S proteasome non-ATPase regulatory subunit 13	yes	2;3	6.8977e-07	59.294	2	216370000
TCAVHITLDPDTANPWLILSEDRR	24	1	2735.37	P19474;H0YDP8	P19474	284	307	TRIM21	E3 ubiquitin-protein ligase TRIM21	yes	4	2.5286e-15	135.21	2	0
TCFVDCLIEQTHPEIR	16	0	1902.9	Q8IXJ3;B4DZB1;B3KX19;Q6IBM8;A8KAP3;Q15029	Q8IXJ3	21	36	SNRP116;U5-116KD;EFTUD2	116 kDa U5 small nuclear ribonucleoprotein component	yes	3	9.9395e-06	71.98	1	0
TDACFIR	7	0	824.385	A0A140VK70;P35998;A0A1W2PQS1;Q75L23	A0A140VK70	233	239	PSMC2	26S protease regulatory subunit 7	yes	2	0.029497	54.787	1	0
TDDIPVWDQEFLK	13	0	1604.77	E5RGM3;E7ERH2;F8W8N3;E5RJR5;P63208	E5RGM3	82	94	SKP1	S-phase kinase-associated protein 1	yes	2	0.00013887	67.704	1	0
TDGEPGPQGWSPR	13	0	1382.62	Q9H773	Q9H773	75	87	DCTPP1	dCTP pyrophosphatase 1	yes	2	1.6591e-05	93.058	1	25690000
TDLEKDIISDTSGDFRK	17	2	1938.95	V9HW65;A0A024R5Z7;P07355;H0YMD0;H0YMU9;H0YN42;H0YKS4;A6NMY6;H0YNP5;H0YM50;B3KRQ1;H0YN28;H0YL33;H0YN52;H0YNA0	V9HW65	153	169	HEL-S-270;ANXA2;ANXA2P2	Annexin;Annexin A2;Putative annexin A2-like protein	yes	3	9.1953e-06	72.583	1	70980000
TEEALQLYNQIIK	13	0	1561.84	D6RDY6;Q86X80;A0PJJ5;Q0D2M6;V9HWK0;Q71V07;O76094	D6RDY6	209	221	SRP72;HEL103	Signal recognition particle subunit SRP72	yes	2	7.0754e-05	80.787	1	48651000
TEQAISFAK	9	0	993.513	Q6I9V5;P12236	Q6I9V5	2	10	SLC25A6	ADP/ATP translocase 3;ADP/ATP translocase 3, N-terminally processed	yes	2	0.023186	41.876	1	0
TFCQLILDPIFK	12	0	1436.77	P13639;Q6PK56;B4DRE8;B4DMC6	P13639	288	299	EEF2	Elongation factor 2	yes	2	6.8979e-05	91.095	1	0
TFEHVTSEIGAEEAEEVGVEHLLR	24	0	2680.3	P51665;B2RD27;H3BNT7;H3BTM8;B4DXI8	P51665	154	177	PSMD7	26S proteasome non-ATPase regulatory subunit 7	yes	3;4	9.0386e-22	112.53	2	515940000
TFIAIKPDGVQR	12	1	1343.76	Q6FHN3;J3KPD9;Q32Q12;P22392;F6XY72;E7ERL0;P15531;C9K028;E5RHP0	Q6FHN3	7	18	NME2;NME1-NME2;NME1	Nucleoside diphosphate kinase;Nucleoside diphosphate kinase B;Nucleoside diphosphate kinase A	yes	3	0.00011323	110.08	1	20428000
TFVSSFMSELSPVR	14	0	1585.78	A0A0S2Z5P5	A0A0S2Z5P5	333	346			yes	2	8.7479e-05	112.13	1	25499000
TGAFSIPVIQIVYETLKDQQEGK	23	1	2563.35	A3RJH1;Q92499	A3RJH1	53	75	DDX1	ATP-dependent RNA helicase DDX1	yes	3	0.035805	25.52	1	40994000
TGEAIVDAALSALR	14	0	1385.75	Q15084	Q15084	119	132	PDIA6	Protein disulfide-isomerase A6	yes	2	2.8242e-12	152.07	1	0
TGEGFIDFIGQVHK	14	0	1546.78	Q59FI2;H0Y6Z7;P10586;H0Y4H1;H0Y7Z9;Q5W9G3;Q7Z3X4;B3KWM1;B3KXA8;H0Y380;B4DWI5	Q59FI2	1456	1469	PTPRF;LAR;DKFZp686B1310	Receptor-type tyrosine-protein phosphatase F;Protein-tyrosine-phosphatase	yes	2;3	0.0015815	60.434	2	161450000
TGEQAPSSPPR	11	0	1125.54	Q59FI2;H0Y6Z7;P10586;H0Y4H1	Q59FI2	64	74	PTPRF	Receptor-type tyrosine-protein phosphatase F	yes	2	0.001379	121.64	1	32130000
TGQAAELGGLLK	12	0	1156.65	O00231;B4DTS5;J3QRY4	O00231	60	71	PSMD11	26S proteasome non-ATPase regulatory subunit 11	yes	2	0.00074632	78.655	1	208740000
TGTITTFEHAHNMR	14	0	1614.76	P13639;Q8TA90;Q6PK56	P13639	482	495	EEF2	Elongation factor 2	yes	2;3;4	1.7781e-06	173.37	3	4961700000
THLSLSHNPEQK	12	0	1389.7	A0A024R652;F5H2F4;B7Z809;P11586;V9GYY3	A0A024R652	867	878	MTHFD1	C-1-tetrahydrofolate synthase, cytoplasmic;Methylenetetrahydrofolate dehydrogenase;Methenyltetrahydrofolate cyclohydrolase;Formyltetrahydrofolate synthetase;C-1-tetrahydrofolate synthase, cytoplasmic, N-terminally processed	yes	2	3.3392e-06	119.21	1	0
THLSLSHQPDKK	12	1	1389.74	B2RD24;A0A087WVM4;B7ZM99;Q6UB35;Q4VXM1;Q4VXM0	B2RD24	665	676	MTHFD1L	Monofunctional C1-tetrahydrofolate synthase, mitochondrial	yes	2	0.0004967	93.556	1	69011000
TIAECLADELINAAK	15	0	1573.8	M0R0F0;Q53G25;A0A024R4Q8;M0R0R2;P46782;M0QZN2	M0R0F0	168	182	RPS5	40S ribosomal protein S5;40S ribosomal protein S5, N-terminally processed	yes	2	5.2015e-05	66.262	1	0
TIAIIAEGIPEALTR	15	0	1566.9	A0A024R1Y2;A0A024R1T9;Q4LE36;P53396;Q8N9C4	A0A024R1Y2	583	597	ACLY;ACLY variant protein	ATP-citrate synthase	yes	2	5.5852e-06	109.24	1	39407000
TIAPCQK	7	0	759.395	B7Z4V2;V9HW84;P38646;Q8N1C8;B7Z1V7;B7Z4T3;A1XP52;H0YBG6	B7Z4V2	348	354	HEL-S-124m;HSPA9	Stress-70 protein, mitochondrial	yes	2	0.019239	72.021	1	0
TIAQDYGVLK	10	0	1106.6	Q06830;A0A0A0MSI0;B2R4P2	Q06830	111	120	PRDX1	Peroxiredoxin-1	yes	2	0.0090583	71.692	1	621570000
TIEYLQPNPASR	12	0	1387.71	M0R0I3;Q9UQD4;Q6FGM0;Q99961;B7Z7W3;Q3V639;Q8IZ09;B7Z7M7;D3DRJ2;B7Z1K6;Q99962;M0QYE0	M0R0I3	19	30	SH3GL1;SH3GL2	Endophilin-A2;Endophilin-A1	yes	2	3.6512e-05	147.75	1	35873000
TIGGGDDSFNTFFSETGAGK	20	0	2006.89	B3KT06;B3KPS3;P68363;A8JZY9;F8VVB9;F8VQQ4;B4DN58;F8VX09;F8VWV9;F8VRZ4;F8VS66;F8VRK0;F8VXZ7;F8W0F6;Q53GA7;F5H5D3;Q9BQE3;B7Z1K5;A0A1W2PQM2;Q8N532	B3KT06	6	25	TUBA1B;TUBA1A;TUBA1C	Tubulin alpha-1B chain;Tubulin alpha-1C chain	no	2	1.1548e-09	100.55	1	242250000
TIGTGLVTNTLAMTEEEK	18	0	1906.96	P49411	P49411	430	447	TUFM	Elongation factor Tu, mitochondrial	yes	2	2.8794e-11	141.13	1	456420000
TILMMGR	7	0	820.43	P13639;Q8TA90;Q6PK56;B4DRE8	P13639	450	456	EEF2	Elongation factor 2	yes	2	0.037197	110.54	1	113000000
TIQFVDWCPTGFK	13	0	1540.74	Q53GA7;F5H5D3;Q9BQE3;B7Z1K5;A0A1W2PQM2;Q8N532	Q53GA7	340	352	TUBA1C	Tubulin alpha-1C chain	no	2	1.155e-05	103.22	1	0
TITGFQTHTTPVLLAHGER	19	0	2078.09	Q59EG8;Q13200;B4DM22;Q13041	Q59EG8	866	884	PSMD2	26S proteasome non-ATPase regulatory subunit 2	yes	2;3;4	8.5145e-10	109.38	3	882870000
TITLEVEPSDTIENVK	16	0	1786.92	J3QS39;J3QTR3;F5H6Q2;Q3MIH3;F5GYU3;F5H2Z3;A0A248RGE3;F5H265;Q5UGI3;B4DV12;F5H388;Q5RKT7;B2RDW1;F5H747;F5GXK7;J3QKN0;Q5U5U6;Q5PY61;Q9UFQ0;Q96C32;Q96MH4;L8B4I8;L8B196;Q96H31;L8B4R0;A8K674;L8B4Z6;L8B4M0;L8B4J3;Q66K58;Q59EM9;P62987;P62979;P0CG47;P0CG48;J3QSA3;F5GZ39;M0R1V7;Q49A90	J3QS39	12	27	UBB;RPS27A;UBC;UBA52;HEL112;DKFZp434K0435;UbC	Ubiquitin-60S ribosomal protein L40;Ubiquitin;60S ribosomal protein L40;Ubiquitin-40S ribosomal protein S27a;Ubiquitin;40S ribosomal protein S27a;Polyubiquitin-B;Ubiquitin;Polyubiquitin-C;Ubiquitin	yes	2	1.5382e-06	107.09	1	73756000
TKFEECR	7	1	911.417	C9JXG8;D3DX26;B3KUP2;A0A140VK94;C9JGV6;F6WQW2;P43487	C9JXG8	103	109	RANBP1	Ran-specific GTPase-activating protein	yes	2	0.026331	81.635	1	0
TLADRLEGTK	10	1	1102.6	Q8IUF8	Q8IUF8	314	323	MINA	Bifunctional lysine-specific demethylase and histidyl-hydroxylase MINA	yes	2	0.024235	59.908	1	0
TLAYLLPAIVHINHQPYLER	20	0	2360.3	A0A1X7SBZ2;A0A1W2PQ51;Q59F66;Q92841;B4DZQ7	A0A1X7SBZ2	222	241	DDX17	Probable ATP-dependent RNA helicase DDX17	yes	3;4	7.551e-07	72.421	2	230210000
TLDFDALSVGQR	12	0	1320.67	Q6DEN2;A0A140VK07	Q6DEN2	49	60	DPYSL3		yes	2	0.00024357	90.108	1	26601000
TLETLIR	7	0	844.502	Q53HJ4;B2R7C5;A0A0S2Z4T1;P25205;Q8NHX6;B4DUQ9;J3KQ69;A0A0S2Z492;B4DS46;Q7Z6P5	Q53HJ4	617	623	MCM3;HCC5	DNA helicase;DNA replication licensing factor MCM3	yes	2	0.009777	139.92	1	64078000
TLGILGLGR	9	0	898.56	A0A286YFL2;A0A286YFA2;B3KSC3;A0A286YF22;A0A2C9F2M7;V9HW79;O43175;A0A286YFM8;A0A286YF78;Q9UMY2;A0A286YFE1	A0A286YFL2	147	155	HEL-S-113;PHGDH;PGDH3	D-3-phosphoglycerate dehydrogenase	yes	2	0.00038757	107.67	1	0
TLHAQIIEK	9	0	1051.6	Q4VCS5;A6NP16;A2BDD9;E7ERM3	Q4VCS5	750	758	AMOT	Angiomotin	yes	2	0.013577	78.264	1	28494000
TLLEGSGLESIISIIHSSLAEPR	23	0	2421.31	A0A0U1RQF0;P49327	A0A0U1RQF0	2481	2503	FASN	Fatty acid synthase;[Acyl-carrier-protein] S-acetyltransferase;[Acyl-carrier-protein] S-malonyltransferase;3-oxoacyl-[acyl-carrier-protein] synthase;3-oxoacyl-[acyl-carrier-protein] reductase;3-hydroxyacyl-[acyl-carrier-protein] dehydratase;Enoyl-[acyl-carrier-protein] reductase;Oleoyl-[acyl-carrier-protein] hydrolase	yes	3	2.3796e-05	60.036	1	73492000
TLMECVSNTAK	11	0	1195.56	Q7L0Y3;C9JVB6	Q7L0Y3	119	129	TRMT10C	Mitochondrial ribonuclease P protein 1	yes	2	0.0076792	50.108	1	0
TLMELLNQMDGFDTLHR	17	0	2032.97	A0A087X2I1;P62333;V9HW24	A0A087X2I1	270	286	PSMC6;HEL-S-73	26S protease regulatory subunit 10B	yes	3	0.00086711	53.308	1	38509000
TLNDELEIIEGMK	13	0	1503.75	A0A024R3X4;P10809;B3GQS7;B7Z5E7;B7Z4F6;B7Z597;B7Z532;Q53SE2;E7ESH4;E7EXB4	A0A024R3X4	206	218	HSPD1	60 kDa heat shock protein, mitochondrial	yes	2	7.8918e-05	105.86	1	515750000
TLNMTTSPEEK	11	0	1249.59	B4DUT7;Q53F90;A0A140VJK6;P49915	B4DUT7	275	285	GMPS	GMP synthase [glutamine-hydrolyzing]	yes	2	0.0041163	68.893	1	126760000
TLPLTGSTFHDQIAMLSHR	19	0	2124.08	A0A024DAK3;Q59EC0;P55265;B7Z8Y3	A0A024DAK3	832	850	ADAR	Double-stranded RNA-specific adenosine deaminase	yes	3	0.0054325	47.082	1	44136000
TLQQNAESR	9	0	1045.52	B3KN59;B3KM36;O95816	B3KN59	201	209	BAG2	BAG family molecular chaperone regulator 2	yes	2	0.017133	74.301	1	3420100
TLSYLLPAIVHINHQPFLER	20	0	2360.3	B4DN41;J3KTA4;B5BUE6;P17844;Q7Z2V5;Q59E92;J3QRQ7;J3QRN5	B4DN41	134	153	DDX5;DKFZp686J01190	Probable ATP-dependent RNA helicase DDX5	yes	3;4	0.00018502	53.553	2	114350000
TLTGVLPER	9	0	984.56	Q8WVY7	Q8WVY7	34	42	UBLCP1	Ubiquitin-like domain-containing CTD phosphatase 1	yes	2	0.0036969	92.439	1	0
TLTLVDTGIGMTK	13	0	1348.73	B4DMA2;B4DGL0;A0A024RD80;P08238;Q6PK50;O14942	B4DMA2	83	95	HSP90AB1	Heat shock protein HSP 90-beta	yes	2	8.5133e-07	152.62	1	93734000
TMLELINQLDGFDPR	15	0	1760.88	A0A140VK70;P35998;A0A1W2PQS1;Q75L23	A0A140VK70	298	312	PSMC2	26S protease regulatory subunit 7	yes	2	0.017459	53.013	1	347900000
TMLELLNQLDGFDSR	15	0	1750.86	Q53XL8;Q53HB3;P62191	Q53XL8	308	322	PSMC1	26S protease regulatory subunit 4	yes	2	1.9032e-06	159.94	1	447340000
TMLELLNQLDGFEATK	16	0	1821.92	A0A140VJS3;P62195;Q59GS3	A0A140VJS3	272	287	PSMC5	26S protease regulatory subunit 8	yes	2	1.4301e-08	142.08	1	436670000
TMLELLNQLDGFQPNTQVK	19	0	2188.12	R4GNH3;A0A140VK42;P17980;E9PM69;E9PKD5	R4GNH3	293	311	PSMC3	26S protease regulatory subunit 6A	yes	2	1.4704e-09	125.54	1	173450000
TMQTLLSLVR	10	0	1160.66	Q6LET3;A0A140VJL3;P00492	Q6LET3	142	151	HPRT1	Hypoxanthine-guanine phosphoribosyltransferase	yes	2	0.0019967	124.23	1	72616000
TMSIVSYNHLGNNDGENLSAPLQFR	25	0	2776.32	A0A140VK73;Q9NPH2;B3KSG0;B7Z3K3	A0A140VK73	326	350	ISYNA1	Inositol-3-phosphate synthase 1	yes	3	2.9873e-05	52.061	1	102890000
TMTNALR	7	0	805.412	Q6IBN0;O43242;B3KNN7;Q96N86;B4DV84;B4DEB0;B4DPM7;Q8N9M2	Q6IBN0	308	314	PSMD3	26S proteasome non-ATPase regulatory subunit 3	yes	2	0.027052	137.44	1	0
TNLYQDDAVTGEAAGLALGLVMLGSK	26	0	2606.33	Q99460;B2R6D0;A0A087WW66;Q05CW6;Q05BX4	Q99460	499	524	PSMD1	26S proteasome non-ATPase regulatory subunit 1	yes	3	1.3359e-05	42.708	1	46309000
TNQELQEINR	10	0	1243.62	V9HW65;A0A024R5Z7;P07355;H0YMD0;H0YMU9;H0YN42;H0YKS4;B4DNH8;A6NMY6;H0YMM1;H0YNP5;H0YM50;B3KRQ1;H0YN28;H0YL33;H0YN52;H0YNA0;H0YLE2	V9HW65	136	145	HEL-S-270;ANXA2;ANXA2P2	Annexin;Annexin A2;Putative annexin A2-like protein	yes	2	0.00048057	141.52	1	293100000
TNTPVKEDWNVR	12	1	1457.73	X5D2J9;Q499G6;X5D939;X5DNP5;B4DH52;X5DR09;P78347;A0A1W6S962;A8K9W7;B4DRA9	X5D2J9	515	526	GTF2I	General transcription factor II-I	yes	2	0.00051801	100.48	1	170980000
TPAQYDASELK	11	0	1221.59	V9HW65;A0A024R5Z7;P07355;H0YMD0;H0YMU9;H0YN42;H0YKS4;B4DNH8;A6NMY6;H0YMM1;H0YNP5;H0YM50;H0YKZ7;H0YLV6;H0YMT9;H0YKX9;H0YMW4	V9HW65	105	115	HEL-S-270;ANXA2;ANXA2P2	Annexin;Annexin A2;Putative annexin A2-like protein	yes	2	0.0011507	114.97	1	517280000
TPCNAGTFSQPEK	13	0	1378.62	J3QT28;A0A140VJF3;O43684;J3QSX4;B4DDM6	J3QT28	127	139	BUB3	Mitotic checkpoint protein BUB3	yes	2	0.013028	44.639	1	0
TPEQCPSVVSLLSESYNPHVR	21	0	2341.14	Q99460;B2R6D0;A0A087WW66;Q05CW6;Q05BX4;H7C378	Q99460	629	649	PSMD1	26S proteasome non-ATPase regulatory subunit 1	yes	2;3	1.1537e-14	136.85	2	0
TPGPGAQSALR	11	0	1053.56	E5RH77;A0A2R8Y811;P62263	E5RH77	107	117	RPS14	40S ribosomal protein S14	yes	2	0.0017064	77.662	1	119250000
TPLFDQIIDMLR	12	0	1460.77	P54886	P54886	627	638	ALDH18A1	Delta-1-pyrroline-5-carboxylate synthase;Glutamate 5-kinase;Gamma-glutamyl phosphate reductase	yes	2	0.00014204	98.943	1	23645000
TPLQVAK	7	0	755.454	B1AJY5;O75832;B1AJY7	O75832	207	213	PSMD10	26S proteasome non-ATPase regulatory subunit 10	no	2	0.02537	104.76	6	434720000
TPLQVAKGGLGLILK	15	1	1506.95	B1AJY5;O75832;B1AJY7	O75832	207	221	PSMD10	26S proteasome non-ATPase regulatory subunit 10	no	3	0.00038777	60.937	2	151090000
TPVEPEVAIHR	11	0	1246.67	E5RIP1;E5RJX2;P60866	E5RIP1	9	19	RPS20	40S ribosomal protein S20	yes	3	0.023831	38.021	1	28918000
TQPMTAQAASYR	12	0	1323.62	A0A0S2Z4Z0;Q96PK6;Q59GV2	A0A0S2Z4Z0	263	274	RBM14	RNA-binding protein 14	yes	2	0.00072156	79.201	1	41743000
TQTPPVEENVTQK	13	0	1469.74	Q9P0B4;B4DSX4;Q6P1Q9	Q9P0B4	140	152	METTL2B	Methyltransferase-like protein 2B	yes	2	0.00047929	60.641	1	0
TQTPPVSPAPQPTEER	16	0	1733.86	Q53HG7;Q14247;A0A024R5M3;B3KRK4;B4E358;H0YEV2;H0YCD9	Q53HG7	399	414	CTTN	Src substrate cortactin	yes	2	3.325e-05	73.466	1	40106000
TRFRLSTSWR	10	2	1308.71	Q8N123	Q8N123	130	139	CPXCR1	CPX chromosomal region candidate gene 1 protein	yes	3	0.031114	34.692	1	22101000
TRLELEENQMK	11	1	1389.69	A0A090N7X1;A0A090N7Y2;Q9UG63	A0A090N7X1	316	326	ABCF2	ATP-binding cassette sub-family F member 2	yes	2	0.015642	70.1	1	41053000
TSDLIVLGLPWK	12	0	1340.77	K7EJM5;A0A0A0N0N3;A0A087WX29;A0A0A0N0M3;K7EN94;B1AKP7;G3V162;A0A087X260;A0A087WYY0;A0A0A0N0L3;A0A024R4E2;Q13148;A0A087WXQ5;A0A087WV68;B4DRW3	K7EJM5	103	114	TARDBP;TDP43	TAR DNA-binding protein 43	yes	2	0.00023758	90.629	1	42563000
TSFTQEQIEALEKEFER	17	1	2084.01	A0A1W2PRS6;A0A1W2PQL7;A0A1W2PRA4;Q59GD2;A0A1W2PQM7;A0A1W2PS91;D1KF47;A0A1W2PSA8;A0A1W2PPN2;E9PKM0;A0A1W2PQA8;Q66SS1;B3KQG1;F1T0F8;D3DQZ8;A0A1W2PQG7;P26367;A0A1W2PRW7;A0A1W2PSB5;A0A1W2PQG3;A0A1W2PPG3;A0A1W2PP89;A0A1W2PP27;A0A1W2PRU4;A0A1W2PQJ8;A0A1W2PQ31;A0A1W2PNS7;A0A1W2PPJ2;A0A1W2PPH0;A0A1W2PRA8;A0A1W2PRH6;A0A1W2PPM5;B1B1I8;A0A1X7SBT0;B1B1I9;A0A1W2PRG3	A0A1W2PRS6	216	232	PAX6	Paired box protein Pax-6	yes	3	0.00019455	60.768	1	42375000
TSSAQVEGGVHSLHSYEK	18	0	1914.91	H0Y4R1;P12268	H0Y4R1	450	467	IMPDH2	Inosine-5-monophosphate dehydrogenase 2	yes	2;4	3.5067e-06	52.784	2	80528000
TSYEEFTHK	9	0	1140.51	Q6P2Q9	Q6P2Q9	1202	1210	PRPF8	Pre-mRNA-processing-splicing factor 8	yes	2	0.028785	63.673	1	57434000
TTGIVMDSGDGVTHTVPIYEGYALPHAILR	30	0	3182.61	Q8WVW5;Q53GK6;Q53G99;Q53G76;Q1KLZ0;P63261;P60709;B4DW52;A0A2R8Y793;B3KWQ3;Q6PJ43;B7ZAP6;I3L3I0;I3L1U9;I3L4N8;Q562Z7;Q562Y6;Q562X9;Q562S0;Q562N8;Q562N0;Q562L5;A0A2R8YEA7;Q562R8;Q562P0;Q562L9;Q562Y8;Q562N2;Q562M5;Q562M3;Q562Z6;A0AUL6	Q8WVW5	136	165	PS1TP5BP1;ACTG1;ACTB;ACT	Actin, cytoplasmic 2;Actin, cytoplasmic 2, N-terminally processed;Actin, cytoplasmic 1;Actin, cytoplasmic 1, N-terminally processed	yes	3;4;5	1.7619e-09	72.425	6	7624200000
TTLTAAITK	9	0	918.539	P49411;H3BNU3	P49411	71	79	TUFM	Elongation factor Tu, mitochondrial	yes	2	0.032331	61.679	1	398160000
TTNFAGILSQGLR	13	0	1376.74	B4E0E1;B2R5W3;A0A024R3T8;P09874	B4E0E1	845	857	PARP1	Poly [ADP-ribose] polymerase 1	yes	2	0.00016075	111.27	1	33404000
TTPGKENFR	9	1	1048.53	C9J352;C9JWD9;F2Z3G4;C9J4U1;C9JYI4;Q5BKZ2;P52294	C9J352	2	10	KPNA1	Importin subunit alpha;Importin subunit alpha-5;Importin subunit alpha-5, N-terminally processed	yes	2	0.019749	57.047	1	62343000
TTPSVVAFTADGER	14	0	1449.71	B7Z4V2;V9HW84;P38646;Q8N1C8;B7Z1V7;D6RJI2;D6RA73	B7Z4V2	72	85	HEL-S-124m;HSPA9	Stress-70 protein, mitochondrial	yes	2	2.8445e-05	98.353	1	97833000
TTSAGTGGMWR	11	0	1123.51	P60468	P60468	47	57	SEC61B	Protein transport protein Sec61 subunit beta	yes	2	0.00048729	106.42	1	95938000
TVALGHR	7	0	752.429	Q15008;B3KT66;C9J0E9	Q15008	131	137	PSMD6	26S proteasome non-ATPase regulatory subunit 6	yes	2	0.024372	126.68	1	114600000
TVALWDLR	8	0	972.539	H0YEU5;B4DRT0;Q5JP02;H0YCT5;H0YF10;H0YDK2;E9PC52;Q6FHQ0;A8K6A2;Q16576;Q09028	H0YEU5	35	42	RBBP4;RBBP7	Histone-binding protein RBBP7;Histone-binding protein RBBP4	yes	2	0.0016051	100.19	1	0
TVDLQDAEEAVELVQYAYFK	20	0	2330.13	Q53HJ4;B2R7C5;A0A0S2Z4T1;P25205;Q8NHX6;B4DUQ9;J3KQ69;A0A0S2Z492;B4DS46;Q7Z6P5	Q53HJ4	636	655	MCM3;HCC5	DNA helicase;DNA replication licensing factor MCM3	yes	2	0.00045512	58.04	1	91349000
TVESEAASYLDQISR	15	0	1667.8	K7ENH2;B3KQ25;K7ESG5;K9J957;V9HWJ8;Q6FHK7;A0A024R203;P61289;J7FRP4;A0A087WTV2	K7ENH2	144	158	PSME3;HEL-S-283	Proteasome activator complex subunit 3	yes	2	5.0473e-06	125.54	1	91863000
TVIIEQSWGSPK	12	0	1343.71	A0A024R3X4;P10809;B3GQS7;B7Z5E7;B7Z597;Q53SE2;E7ESH4;E7EXB4;A0A0S2Z415;C9JL19;C9JCQ4;C9JL25	A0A024R3X4	61	72	HSPD1	60 kDa heat shock protein, mitochondrial	yes	2	0.00043645	134.68	1	52259000
TVIKKDEQEHEFYK	14	2	1792.9	A8K2M0;P43686	A8K2M0	405	418	PSMC4	26S protease regulatory subunit 6B	yes	3	0.014302	46.069	1	68386000
TVIPGMPTVIPPGLTR	16	0	1647.94	A0A024R588;A0A024R566;B4DJU4;A0A024R5D9;A0A024R572;Q15637;Q14820;F8WEV5;C9J792	A0A024R588	31	46	SF1	Splicing factor 1	yes	2	5.4032e-07	84.169	1	58780000
TVLDQQQTPSR	11	0	1271.65	B4DSR0;E5KNY5;P42704	B4DSR0	1029	1039	LRPPRC	Leucine-rich PPR motif-containing protein, mitochondrial	yes	2	0.0014606	80.231	1	14482000
TVLEHYALEDDPLAAFK	17	0	1930.97	Q0VAB1;A0A024R0M6;Q3ZCQ8;M0R0C3;M0R2F8	Q0VAB1	399	415	TIMM50	Mitochondrial import inner membrane translocase subunit TIM50	yes	2;3	7.8051e-06	66.267	2	66888000
TVLIACNVK	9	0	959.547	Q53HJ4;B2R7C5;A0A0S2Z4T1;P25205;Q8NHX6;B4DUQ9;J3KQ69;A0A0S2Z492;B4DS46	Q53HJ4	258	266	MCM3;HCC5	DNA helicase;DNA replication licensing factor MCM3	yes	2	0.0032378	82.671	1	0
TVPVEAVTSK	10	0	1029.57	Q53HG7;Q14247;A0A024R5M3;B3KRK4;B4E358	Q53HG7	337	346	CTTN	Src substrate cortactin	yes	2	0.0041559	83.998	1	140270000
TVQGSGHQEHINIHK	15	0	1683.84	Q53HG7;Q14247;A0A024R5M3;Q76MU0	Q53HG7	43	57	CTTN;EMS1	Src substrate cortactin	yes	2	0.00020308	84.169	1	110990000
TVQVVPHITDAIQEWVMR	18	0	2121.1	P17812;B7Z9C4	P17812	110	127	CTPS1	CTP synthase 1	yes	3	0.037762	34.649	1	147980000
TVSLGAGAKDELHIVEAEAMNYEGSPIK	28	1	2928.45	A0A0S2Z4G7;A0A0S2Z491;P06748;A0A140VJQ2;A4ZU86	A0A0S2Z4G7	46	73	NPM1	Nucleophosmin	yes	4	4.6866e-09	74.287	1	75861000
TVTAMDVVYALK	12	0	1309.7	Q0VAS5;B2R4R0;P62805	Q0VAS5	81	92	HIST1H4H;HIST1H4A	Histone H4	yes	2	0.00073367	78.934	1	18549000
TVTNAVVTVPAYFNDSQR	18	0	1980.99	V9HW22;Q53GZ6;P11142;Q96IS6;B3KTV0;Q53HF2;E9PN89;E9PQQ4;E9PQK7;E9PK54;E9PLF4;B4DTX2;E9PI65	V9HW22	138	155	HEL-S-72p;HSPA8	Heat shock cognate 71 kDa protein	yes	2	6.2938e-09	145	1	467800000
TVVTGIEMFHK	11	0	1260.65	P49411	P49411	301	311	TUFM	Elongation factor Tu, mitochondrial	yes	2	0.0056297	63.816	1	36550000
TVYCNVHK	8	0	962.464	B2R8R5;Q13263;M0R2I3;M0R3C0	B2R8R5	206	213	TRIM28	Transcription intermediary factor 1-beta	yes	2	0.030526	47.916	1	0
TVYGGGCSEMLMAHAVTQLANR	22	0	2308.08	V9HW96;P78371;Q9H369;B7Z4R3;F5GWF6	V9HW96	406	427	HEL-S-100n;CCT2	T-complex protein 1 subunit beta	yes	3	0.00011621	51.834	1	0
TYEAALETIQNMSK	14	0	1597.77	O00231	O00231	396	409	PSMD11	26S proteasome non-ATPase regulatory subunit 11	yes	2	0.00010392	118.23	1	225600000
TYHALSNLPK	10	0	1142.61	O00231;B4DTS5;J3QS13	O00231	176	185	PSMD11	26S proteasome non-ATPase regulatory subunit 11	yes	2;3	0.0023868	95.358	2	824690000
TYPVNTPER	9	0	1075.53	Q08AR5;Q99543	Q08AR5	193	201	DNAJC2	DnaJ homolog subfamily C member 2;DnaJ homolog subfamily C member 2, N-terminally processed	yes	2	0.019123	72.485	1	13002000
TYQGLESLEEVCVYHSGVPIFHEGMK	26	0	2951.38	A0A024R3C3;A0A024R394;Q9UHD1	A0A024R3C3	146	171	CHORDC1	Cysteine and histidine-rich domain-containing protein 1	yes	4	0.00095347	43.494	1	0
TYSTSFTPMYHAVTK	15	0	1732.81	V9HW90;P00390	V9HW90	442	456	HEL-75;GSR	Glutathione reductase, mitochondrial	yes	3	0.04081	25.957	1	222330000
VAAAESMPLLLECAR	15	0	1572.8	B3KWG6;B4E0R6;A0A024RDY0;H0Y8C6;O00410	B3KWG6	342	356	RANBP5;IPO5	Importin-5	yes	2	5.9954e-05	64.64	1	0
VAEEHAPSIVFIDEIDAIGTK	21	0	2253.15	Q53XL8;Q53HB3;P62191	Q53XL8	273	293	PSMC1	26S protease regulatory subunit 4	yes	2;3	1.3659e-07	75.358	3	204760000
VAEEHAPSIVFIDEIDAIGTKR	22	1	2409.25	Q53XL8;Q53HB3;P62191	Q53XL8	273	294	PSMC1	26S protease regulatory subunit 4	yes	3	0.0022938	47.392	1	36312000
VAHILNISPPLNLNPVWFK	19	0	2171.23	B4E136;Q6YN16	B4E136	25	43	HSDL2	Hydroxysteroid dehydrogenase-like protein 2	yes	3	1.1549e-10	90.754	1	83562000
VALDMTTLTIMR	12	0	1363.72	A0A087X2I1;P62333;V9HW24;H0YJC0;H0YJS8;B4DR91	A0A087X2I1	112	123	PSMC6;HEL-S-73	26S protease regulatory subunit 10B	yes	2	0.00069097	119.68	1	95834000
VALIGSPVDLTYTYDHLGDSPK	22	0	2360.19	B4DJ81;E5KRK5;P28331;A0A291FIZ5	B4DJ81	313	334	NDUFS1	NADH-ubiquinone oxidoreductase 75 kDa subunit, mitochondrial	yes	3	2.2016e-07	73.758	1	52204000
VALLDVFR	8	0	931.549	Q53HJ4;B2R7C5;A0A0S2Z4T1;P25205;B4DUQ9;J3KQ69;B4DS46	Q53HJ4	749	756	MCM3	DNA helicase;DNA replication licensing factor MCM3	yes	2	1.6669e-05	162.07	1	72305000
VANLCGINQK	10	0	1058.55	C9K0E3;B4DFV1;A0A087X0I9;A0A024R328;Q05655;Q04759	C9K0E3	204	213	PRKCD;PRKCQ	Protein kinase C;Protein kinase C delta type;Protein kinase C delta type;Protein kinase C delta type regulatory subunit;Protein kinase C delta type catalytic subunit;Protein kinase C theta type	yes	2	0.010097	50.632	1	0
VAPEEHPVLLTEAPLNPK	18	0	1953.06	Q8WVW5;Q53GK6;Q53G99;Q53G76;Q1KLZ0;P63261;P60709;B4DVQ0;B4DW52;B4E335;B4E3A4;A0A2R8Y793;I3L3I0;I3L1U9;I3L4N8;A1E282;G5E9R0;K7EM38;E7EVS6;I3L3R2;A0A2R8YGF8;J3KT65;Q562Z7;Q562Y6;Q562X9;Q562S0;Q562N8;Q562N0;Q562L5;Q562R8;Q562P0;Q562L9;Q562U2;Q562P9;Q562N6;Q562N4;Q562L6;Q562Z4;Q562V5	Q8WVW5	84	101	PS1TP5BP1;ACTG1;ACTB;ACT	Actin, cytoplasmic 2;Actin, cytoplasmic 2, N-terminally processed;Actin, cytoplasmic 1;Actin, cytoplasmic 1, N-terminally processed	yes	2;3	2.9528e-09	123.84	2	1055000000
VASEAPLEHKPQVEASSPR	19	1	2031.04	Q6PKF2;A0A024R6D1;Q8TD19	Q6PKF2	196	214	NEK9	Serine/threonine-protein kinase Nek9	yes	3;4	0.00012978	59.512	2	115890000
VATQAVEDVLNIAK	14	0	1469.81	A0A0C4DGV3;A0A024R048;B7Z8V7;Q4G0N4	A0A0C4DGV3	131	144	NADK2;FLJ30596	NAD kinase 2, mitochondrial	yes	2	3.7385e-05	80.24	1	246330000
VCEVCSAYLGLHDNDRR	17	1	1948.89	Q9Y383;B3KSL5;A0A0A6YYJ8;B3KRR1;B8ZZ10;A8MYV2;D3DU41;Q1W6G4;Q9NQ29	Q9Y383	189	205	LUC7L2;LUC7L	Putative RNA-binding protein Luc7-like 2;Putative RNA-binding protein Luc7-like 1	yes	4	2.459e-07	107.07	1	0
VCLQPIR	7	0	827.469	Q59FI2;H0Y6Z7;P10586;H0Y4H1;H0Y7Z9;Q5W9G3;Q7Z3X4;B3KWM1;B3KXA8;H0Y380;B3KXJ7;B4DWI5;B4DK48;Q59H90;Q3KPI9;G8JL96;Q9UM81;F5GWR7;A0A0A0MR60;Q59FX6;Q2HXI4;P23468;Q13332;A8E4L7	Q59FI2	1326	1332	PTPRF;LAR;DKFZp686B1310;PTPRD;PTPRS;PTPsigma	Receptor-type tyrosine-protein phosphatase F;Protein-tyrosine-phosphatase;Receptor-type tyrosine-protein phosphatase delta;Receptor-type tyrosine-protein phosphatase S	yes	2	0.0092814	97.64	1	0
VCQGIGMVNR	10	0	1075.53	A0A024RCX8;Q9Y3C6	A0A024RCX8	132	141	PPIL1	Peptidyl-prolyl cis-trans isomerase;Peptidyl-prolyl cis-trans isomerase-like 1	yes	2	0.00043851	113.89	1	0
VDILDPALLR	10	0	1123.66	R4GNH3;A0A140VK42;P17980;E9PM69;A8K781;E9PKD5	R4GNH3	319	328	PSMC3	26S protease regulatory subunit 6A	yes	2	0.001987	124.08	1	168000000
VDQETLTEMVKPSIDYVR	18	1	2122.06	B4DWZ7;B3KTN5;Q9NS86	B4DWZ7	262	279	LANCL2	LanC-like protein 2	yes	2;3	2.8059e-06	76.262	2	340970000
VEAVNMAEGIIHDTETK	17	0	1855.9	B7Z4V2;V9HW84;P38646;Q8N1C8;B7Z4T3;A1XP52	B7Z4V2	565	581	HEL-S-124m;HSPA9	Stress-70 protein, mitochondrial	yes	2;3	1.6501e-07	95.417	2	608980000
VEEQEPELTSTPNFVVEVIKNDDGKK	26	2	2943.47	Q07021;I3L3Q7;I3L3B0	Q07021	155	180	C1QBP	Complement component 1 Q subcomponent-binding protein, mitochondrial	yes	4	3.6615e-09	76.161	1	104390000
VEILANDQGNR	11	0	1227.62	Q53FC7;B3KSM6;B2R6X5;P17066;P48741	Q53FC7	28	38	HSPA6;HSPA7	Heat shock 70 kDa protein 6;Putative heat shock 70 kDa protein 7	yes	2	0.0013939	122.13	1	3786000000
VETGVLKPGMVVTFAPVNVTTEVK	24	1	2514.38	Q6IPT9;Q6IPS9;Q6IPN6;Q53HR5;Q53HQ7;Q53HM9;Q5VTE0;P68104;Q96RE1;A0A087WVQ9;A8K9C4;Q53GE9;Q53G85;Q8IUB0;B4DNE0;B4DV42;Q504Z0;Q9NZS6;Q53G89;Q96C29;Q8TBL1;Q6P082;Q96CD8;Q6P4C9;B4E2C5;Q14222	Q6IPT9	267	290	EEF1A1;EEF1A1P5;EEF1A1L14;EEF1A	Elongation factor 1-alpha;Putative elongation factor 1-alpha-like 3;Elongation factor 1-alpha 1	yes	2;3;4	3.9978e-05	71.692	3	5344600000
VETSEHFR	8	0	1003.47	A0A024RBE7;P42167	A0A024RBE7	262	269	TMPO	Lamina-associated polypeptide 2, isoforms beta/gamma;Thymopoietin;Thymopentin	yes	2	6.6381e-08	174.21	1	77525000
VFNTTPDDLDLHVIYDVSHNIAK	23	0	2625.31	Q9Y3I0;B4DNA0	Q9Y3I0	335	357	RTCB	tRNA-splicing ligase RtcB homolog	yes	4	0.039885	19.109	1	56740000
VFQSLPHENKPLTLSNYQTNK	21	1	2457.27	Q76LA1;P04080;A0A1W2PQG6	Q76LA1	69	89	CSTB	Cystatin-B	yes	2;3;4	2.1581e-05	88.561	3	3174300000
VFSGLVSTGLK	11	0	1106.63	P13639;Q8TA90;Q6PK56;B4DRE8	P13639	416	426	EEF2	Elongation factor 2	yes	2	0.013906	55.064	1	0
VFTTQELVQAFTHAPATLEADR	22	0	2444.23	H0YJ63;G3V438;H0YJG7;O95433	H0YJ63	27	48	AHSA1	Activator of 90 kDa heat shock protein ATPase homolog 1	yes	3	6.3324e-13	102.07	1	74225000
VFVGGDDFK	9	0	982.476	A0A140VK73;Q9NPH2;B3KSG0;B7Z3K3	A0A140VK73	297	305	ISYNA1	Inositol-3-phosphate synthase 1	yes	2	0.0060274	103.74	1	41010000
VGCRALVTAVKFK	13	2	1390.81	A0A2P9ADF8	A0A2P9ADF8	144	156			yes	3	0.012233	42.031	1	0
VGEVIVTK	8	0	843.507	A0A024R3X4;P10809;B3GQS7;B7Z5E7;B7Z4F6;B7Z597;B7Z532	A0A024R3X4	345	352	HSPD1	60 kDa heat shock protein, mitochondrial	yes	2	0.03509	75.738	1	199250000
VGEVIVTKDDAMLLK	15	1	1629.9	A0A024R3X4;P10809;B3GQS7;B7Z5E7;B7Z4F6;B7Z532	A0A024R3X4	345	359	HSPD1	60 kDa heat shock protein, mitochondrial	yes	2	0.00039327	71.159	1	99102000
VGGSMLTPR	9	0	916.48	Q59FI2;H0Y6Z7;P10586;H0Y4H1;H0Y7Z9;Q5W9G3;Q7Z3X4;B3KWM1;B3KXA8;H0Y380	Q59FI2	787	795	PTPRF;LAR;DKFZp686B1310	Receptor-type tyrosine-protein phosphatase F;Protein-tyrosine-phosphatase	yes	2	0.0033541	127.56	1	66562000
VGGTSDVEVNEKK	13	1	1360.68	A0A024R3X4;P10809;B3GQS7;B7Z5E7;B7Z4F6;B7Z597	A0A024R3X4	406	418	HSPD1	60 kDa heat shock protein, mitochondrial	yes	2	0.029549	33.875	1	89734000
VGINYQPPTVVPGGDLAK	18	0	1823.98	B3KT06;B3KPS3;P68363;A8JZY9;P68366;B4DDU2;B4DN58;Q53GA7;F5H5D3;Q9BQE3;B7Z1K5;A0A1W2PQM2;Q8N532	B3KT06	318	335	TUBA1B;TUBA4A;TUBA1C	Tubulin alpha-1B chain;Tubulin alpha-4A chain;Tubulin alpha-1C chain	no	2	0.0013651	54.524	1	128600000
VGLQVVAVK	9	0	911.58	A0A024R3X4;P10809;B3GQS7;B7Z5E7;B7Z4F6;B7Z597;B7Z532	A0A024R3X4	293	301	HSPD1	60 kDa heat shock protein, mitochondrial	yes	2	0.0018441	136.11	1	164350000
VGLSGAPADACSTAQK	16	0	1474.71	Q53GF0;Q8NFW8	Q53GF0	384	399	CMAS	N-acylneuraminate cytidylyltransferase	yes	2	0.0017833	50.354	1	0
VGMVETNSQDRPVDDVK	17	1	1887.9	A0A024RCX8;Q9Y3C6	A0A024RCX8	142	158	PPIL1	Peptidyl-prolyl cis-trans isomerase;Peptidyl-prolyl cis-trans isomerase-like 1	yes	2;3	0.00075939	72.958	2	336880000
VGNIIDTMITDAFLK	15	0	1649.87	A0A2R8YD90;A0A2R8YCS7;Q9Y3Z3	A0A2R8YD90	354	368	SAMHD1	Deoxynucleoside triphosphate triphosphohydrolase SAMHD1	yes	2	0.0047237	53.567	1	24197000
VGNNFHNLQEIR	12	0	1439.73	D6R9Q5;A0A286YEY6;D6RD74;D6RA92;Q9UM13	D6R9Q5	98	109	ANAPC10	Anaphase-promoting complex subunit 10	yes	3	0.00026446	74.76	1	67338000
VGPVAATYPMLNK	13	0	1359.72	A0A140VK73;Q9NPH2;B3KSG0;B7Z3K3;J3QS51	A0A140VK73	518	530	ISYNA1	Inositol-3-phosphate synthase 1	yes	2	7.1413e-05	80.688	1	43812000
VGQAVDVVGQAGKPK	15	1	1451.81	Q59EG8;Q13200;B4DM22;Q13041	Q59EG8	851	865	PSMD2	26S proteasome non-ATPase regulatory subunit 2	yes	2;3	4.9517e-07	129.67	2	3840500000
VGSTSENITQK	11	0	1162.58	F6S8Q4;A0A0D9SFB3;A0A2R8YF78;A0A2R8YCW1;A0A0D9SG12;A0A2R8YFR4;A0A2U3TZJ9;A0A2R8YFS5;B5BTY4;A0A2R8Y4A4;Q59GX6;A0A2R8Y645;A0A0D9SF53;O00571;A0A2R8YDT5;A0A2R8Y7T2;A0A2R8Y5G6;Q5S4N1;A0A2R8YDH3;A0A024R9A4;O15523;B4E132	F6S8Q4	375	385	DDX3X;DDX3Y	ATP-dependent RNA helicase DDX3X;ATP-dependent RNA helicase DDX3Y	yes	2	0.00040759	105.4	1	261630000
VGSVLQEGCGK	11	0	1075.53	B3KT34;A0A024QZ30;P31040;A0A087X1I3;Q0QF12;B3KYA5	B3KT34	303	313	SDHA	Succinate dehydrogenase [ubiquinone] flavoprotein subunit, mitochondrial	yes	2	0.00023306	135.79	1	0
VHAVIGVLMDDTDPLVTVMK	20	0	2152.13	Q53XL8;Q53HB3;P62191	Q53XL8	156	175	PSMC1	26S protease regulatory subunit 4	yes	2;3	7.1928e-11	67.449	2	278520000
VHIEIGPDGR	10	0	1091.57	B4DKS8;A0A024R7T3;P52597;E9PCY7;G8JLB6;P31943;H0YB39;B4DP51;H0YBG7;Q68DG4;H0YBD7;P55795;B4DFK9;B4DP00	E9PCY7	317	326	HNRPF;HNRNPF;HNRNPH1;DKFZp686A15170;HNRNPH2	Heterogeneous nuclear ribonucleoprotein F;Heterogeneous nuclear ribonucleoprotein F, N-terminally processed;Heterogeneous nuclear ribonucleoprotein H;Heterogeneous nuclear ribonucleoprotein H, N-terminally processed;Heterogeneous nuclear ribonucleoprotein H2	no	2;3	0.00072709	126.52	2	1066400000
VHMTWVQPR	9	0	1152.59	A0A024R201;J3KNQ3;Q53GN6;Q9Y6E3;Q9UNM6;B2RBM7;A0A087WUL9;B4DJ66;Q9UNM7	A0A024R201	331	339	PSMD13	26S proteasome non-ATPase regulatory subunit 13	yes	2;3	0.001498	111.04	2	660420000
VHPAMATAAGGCR	13	0	1240.58	L0R8E5;H7C0N4;H7C561	L0R8E5	41	53	SF1		yes	2	8.3535e-06	101.65	1	0
VHVGDEDFVHLR	12	0	1421.71	Q76LA1;P04080	Q76LA1	57	68	CSTB	Cystatin-B	yes	2;3	7.6849e-05	166.07	2	514870000
VHVTQEDFEMAVAK	14	0	1602.77	A0A140VJS3;P62195	A0A140VJS3	376	389	PSMC5	26S protease regulatory subunit 8	yes	2	0.0033928	59.067	1	52873000
VIAATNR	7	0	743.429	R4GNH3;A0A140VK42;P17980;E9PM69;A8K781;E9PKD5	R4GNH3	312	318	PSMC3	26S protease regulatory subunit 6A	yes	2	0.029303	122.98	1	128850000
VIAATNRVDILDPALLR	17	1	1849.08	R4GNH3;A0A140VK42;P17980;E9PM69;A8K781;E9PKD5	R4GNH3	312	328	PSMC3	26S protease regulatory subunit 6A	yes	3	1.5508e-05	46.892	1	55078000
VICAEEPYICK	11	0	1266.6	B4DUT7;Q53F90;A0A140VJK6;P49915	B4DUT7	396	406	GMPS	GMP synthase [glutamine-hydrolyzing]	yes	2	0.00095211	71.223	1	0
VIDVFAMPQSGTGVSVEAVDPVFQAK	26	0	2690.36	A0A140VKF2;O00487;Q4ZG77	A0A140VKF2	69	94	PSMD14	26S proteasome non-ATPase regulatory subunit 14	yes	2;3	5.5546e-06	42.813	2	618390000
VIEPGCVR	8	0	871.459	A0A024R6S1;O60884	A0A024R6S1	303	310	DNAJA2	DnaJ homolog subfamily A member 2	yes	2	0.0098559	97.068	1	0
VIEPLKDFHKDEVR	14	2	1723.93	B4DUT7;Q53F90;A0A140VJK6;P49915	B4DUT7	356	369	GMPS	GMP synthase [glutamine-hydrolyzing]	yes	4	0.00021176	62.891	1	144750000
VIFPDAEMEDVNNPGLR	17	0	1914.91	A0A0S2Z592;B4DI01;Q53H36;A0A0S2Z5J9;Q96SZ6;H0Y721	A0A0S2Z592	456	472	CDK5RAP1	CDK5 regulatory subunit-associated protein 1	yes	2	2.9304e-07	82.171	1	36077000
VIHDNFGIVEGLMTTVHAITATQK	24	0	2594.35	A4UCT1;Q0QET7;E7EUT5;V9HVZ4;Q2TSD0;P04406	A4UCT1	75	98	GAPDH;HEL-S-162eP	Glyceraldehyde-3-phosphate dehydrogenase	yes	3	5.3797e-08	74.222	1	42581000
VILTSIDGVPGSDYINANYIDGYR	24	0	2614.29	Q59FI2;H0Y6Z7;P10586;H0Y4H1;H0Y7Z9;Q5W9G3;Q7Z3X4;B3KWM1;B3KXA8;H0Y380;B3KXJ7	Q59FI2	1037	1060	PTPRF;LAR;DKFZp686B1310	Receptor-type tyrosine-protein phosphatase F;Protein-tyrosine-phosphatase	yes	2	0.0024855	48.112	1	63310000
VILTSIDGVPGSDYINANYIDGYRK	25	1	2742.39	Q59FI2;H0Y6Z7;P10586;H0Y4H1;H0Y7Z9;Q5W9G3;Q7Z3X4;B3KWM1;B3KXA8;H0Y380;B3KXJ7	Q59FI2	1037	1061	PTPRF;LAR;DKFZp686B1310	Receptor-type tyrosine-protein phosphatase F;Protein-tyrosine-phosphatase	yes	3	1.476e-05	60.765	1	70562000
VIMVTGDHPITAK	13	0	1380.74	B7Z1N5;B3KNQ8;B3KSY7;B3KV59;B7Z1Q9;M0R116;B7Z3F8;A0A2R8YEY8;Q53ES0;B7Z3V1;B7Z9V4;A0A0A0MT26;P13637;P05023;B3KX35;B4E0R9;H0Y7C1;B4DIQ8;B3KW93;B3KRI1;Q658V6;B1AKY9;B2RAQ4;A0A0S2Z3W6;Q53FM3;P50993;Q13733;P20648;P54707	B7Z1N5	23	35	ATP1A3;ATP1A1;ATP1A2;DKFZp666G172;ATP1A4;ATP4A;ATP12A	Sodium/potassium-transporting ATPase subunit alpha-3;Sodium/potassium-transporting ATPase subunit alpha-1;Sodium/potassium-transporting ATPase subunit alpha-2;Sodium/potassium-transporting ATPase subunit alpha-4;Potassium-transporting ATPase alpha chain 1;Potassium-transporting ATPase alpha chain 2	yes	2;3	9.1539e-05	77.662	2	69085000
VINDKHDDVMAK	12	1	1383.68	Q99460;B2R6D0;A0A087WW66;Q05CW6;Q05BX4	Q99460	716	727	PSMD1	26S proteasome non-ATPase regulatory subunit 1	yes	2;3	0.00087124	93.096	2	1556900000
VINEPTAAALAYGLDK	16	0	1644.87	B7Z4V2;V9HW84;P38646;Q8N1C8;B7Z1V7;Q2F839	B7Z4V2	205	220	HEL-S-124m;HSPA9	Stress-70 protein, mitochondrial	yes	2	6.4228e-07	83.047	1	544560000
VINEPTAAALAYGLDKSEDK	20	1	2104.07	B7Z4V2;V9HW84;P38646;Q8N1C8;B7Z1V7;Q2F839	B7Z4V2	205	224	HEL-S-124m;HSPA9	Stress-70 protein, mitochondrial	yes	2;3	3.4385e-09	77.39	2	76572000
VITIMQNPR	9	0	1070.59	P62269	P62269	67	75	RPS18	40S ribosomal protein S18	yes	2	0.0012327	139.28	1	39010000
VLAVNSIGR	9	0	927.55	Q59FI2;H0Y6Z7;P10586;H0Y4H1	Q59FI2	45	53	PTPRF	Receptor-type tyrosine-protein phosphatase F	yes	2	1.6606e-12	192.11	1	49871000
VLDLQQIK	8	0	955.57	A0A024R201;J3KNQ3;Q53GN6;Q9Y6E3;Q9UNM6;B2RBM7;B4DJ66	A0A024R201	340	347	PSMD13	26S proteasome non-ATPase regulatory subunit 13	yes	2	0.025052	82.305	1	110670000
VLDVSNSFAVPFDEDDKDDSVWFLDHDYLENMYGMFK	37	1	4401.94	P51665;H3BNT7;H3BTM8	P51665	47	83	PSMD7	26S proteasome non-ATPase regulatory subunit 7	yes	4	0.02398	24.769	1	217380000
VLDWGLQEQLWPHMEALRPR	20	1	2473.27	A0A140VK73;Q9NPH2;B3KSG0	A0A140VK73	156	175	ISYNA1	Inositol-3-phosphate synthase 1	yes	4	1.21e-10	125.18	1	209920000
VLEALLPLK	9	0	994.643	A0A0U1RQF0;P49327	A0A0U1RQF0	2381	2389	FASN	Fatty acid synthase;[Acyl-carrier-protein] S-acetyltransferase;[Acyl-carrier-protein] S-malonyltransferase;3-oxoacyl-[acyl-carrier-protein] synthase;3-oxoacyl-[acyl-carrier-protein] reductase;3-hydroxyacyl-[acyl-carrier-protein] dehydratase;Enoyl-[acyl-carrier-protein] reductase;Oleoyl-[acyl-carrier-protein] hydrolase	yes	2	0.012845	79.469	1	21411000
VLENAEGAR	9	0	957.488	B7Z4V2;V9HW84;P38646;Q8N1C8;B7Z1V7;D6RJI2;D6RA73	B7Z4V2	63	71	HEL-S-124m;HSPA9	Stress-70 protein, mitochondrial	yes	2	8.8049e-07	166.96	1	662530000
VLFSSNGGVVK	11	0	1105.61	P26599;A6NLN1;A0A0U1RRM4;A0A0D9SF20	P26599	472	482	PTBP1	Polypyrimidine tract-binding protein 1	yes	2	0.0014618	80.219	1	40445000
VLGLVLLR	8	0	881.606	J3QLE5;Q66K91;Q5XPV6;B4DVS0;X5DP00;Q53HE7;Q9UIS4;Q15182;P63162;P14678;Q6LBS1	J3QLE5	66	73	SNRPN;SNRPB	Small nuclear ribonucleoprotein-associated protein;Small nuclear ribonucleoprotein-associated protein N;Small nuclear ribonucleoprotein-associated proteins B and B	yes	2	0.00054578	153.67	1	0
VLIVSEDPELPYMRPPLSK	19	1	2182.17	O95831;Q5RZ99;Q5RZA0	O95831	159	177	AIFM1	Apoptosis-inducing factor 1, mitochondrial	yes	3	0.0067441	42.118	1	107640000
VLLSLEHGLWAPNLHFHSPNPEIPALLDGR	30	0	3341.77	A0A0U1RQF0;P49327	A0A0U1RQF0	344	373	FASN	Fatty acid synthase;[Acyl-carrier-protein] S-acetyltransferase;[Acyl-carrier-protein] S-malonyltransferase;3-oxoacyl-[acyl-carrier-protein] synthase;3-oxoacyl-[acyl-carrier-protein] reductase;3-hydroxyacyl-[acyl-carrier-protein] dehydratase;Enoyl-[acyl-carrier-protein] reductase;Oleoyl-[acyl-carrier-protein] hydrolase	yes	5	0.0012466	43.554	1	119650000
VLMATNR	7	0	803.432	A0A140VK70;P35998;A0A1W2PQS1;Q75L23	A0A140VK70	317	323	PSMC2	26S protease regulatory subunit 7	yes	2	0.002439	158.53	1	0
VLMATNRPDTLDPALMR	17	1	1912.99	A0A140VK70;P35998;A0A1W2PQS1;Q75L23	A0A140VK70	317	333	PSMC2	26S protease regulatory subunit 7	yes	2;3	0.00016439	70.942	2	111940000
VLMATNRPDTLDPALMRPGR	20	2	2223.16	A0A140VK70;P35998;A0A1W2PQS1;Q75L23	A0A140VK70	317	336	PSMC2	26S protease regulatory subunit 7	yes	2;4	2.8734e-10	118.53	2	298820000
VLNTNIDGR	9	0	1000.53	P62269;A0A0G2JQH2;Q5GGW2	P62269	15	23	RPS18	40S ribosomal protein S18	yes	2	0.0053978	107.29	1	79918000
VLSGEFQIVNPHLLK	15	0	1692.96	B4DNN4;Q53GZ5;P23921;B4DXD1;E9PL69;B4DXB0;B4DS95;B4E0I8	B4DNN4	599	613	RRM1	Ribonucleoside-diphosphate reductase;Ribonucleoside-diphosphate reductase large subunit	yes	3	0.030154	30.961	1	28375000
VLSGTIHAGQPVK	13	0	1305.74	Q8IXJ3;B4DZB1;B3KX19;Q6IBM8;A8KAP3;Q15029;B3KWY2	Q8IXJ3	374	386	SNRP116;U5-116KD;EFTUD2	116 kDa U5 small nuclear ribonucleoprotein component	yes	2	0.030027	59.426	1	59275000
VLSQQAASVVK	11	0	1128.65	A0A1B0GWJ0;A0A1B0GTJ7;X5D8S6;Q71UA4;B4DP46;A0A0A6YY92;P30566;A0A096LNY6;B4DUM2	A0A1B0GWJ0	405	415	ADSL	Adenylosuccinate lyase	yes	2	0.0051858	65.305	1	269450000
VLSTSENEISQKVSDSSVK	19	1	2036.03	F8VRI7;A0A024RBD7;Q9H0E7	F8VRI7	245	263	USP44	Ubiquitinyl hydrolase 1;Ubiquitin carboxyl-terminal hydrolase;Ubiquitin carboxyl-terminal hydrolase 44	yes	2	0.018601	43.991	1	815510000
VLTMPETCR	9	0	1048.5	Q99460;B2R6D0;A0A087WW66	Q99460	891	899	PSMD1	26S proteasome non-ATPase regulatory subunit 1	yes	2	0.00097818	128.61	1	0
VLVWDLR	7	0	899.523	J3QT28;A0A140VJF3;O43684;B4DDM6	J3QT28	159	165	BUB3	Mitotic checkpoint protein BUB3	yes	2	0.014176	97.071	1	0
VMIPQDEYPEINFVGLLIGPR	21	0	2399.26	A0A024R588;A0A024R566;B4DJU4;A0A024R5D9;A0A024R572;Q15637;B4DSE4;B4DX42	A0A024R588	140	160	SF1	Splicing factor 1	yes	2;3	0.012674	47.915	2	57163000
VMLGETNPADSKPGTIR	17	1	1784.91	Q6FHN3;J3KPD9;Q32Q12;P22392;E7ERL0;O60361;P15531	Q6FHN3	89	105	NME2;NME1-NME2;NME1;NME2P1	Nucleoside diphosphate kinase;Nucleoside diphosphate kinase B;Putative nucleoside diphosphate kinase;Nucleoside diphosphate kinase A	yes	2;3	2.2843e-06	130.56	2	423990000
VMTIAPGLFGTPLLTSLPEK	20	0	2084.16	A0A0S2Z410;Q99714	A0A0S2Z410	193	212	HSD17B10	3-hydroxyacyl-CoA dehydrogenase type-2	yes	2	0.00020507	61.212	1	239600000
VMTIPYQPMPASSPVICAGGQDR	23	0	2417.15	Q53SS8;Q15365	Q53SS8	178	200	PCBP1	Poly(rC)-binding protein 1	yes	2	5.7208e-08	75.764	1	0
VNEIVETNRPDSK	13	1	1499.76	Q15008;B3KT66	Q15008	350	362	PSMD6	26S proteasome non-ATPase regulatory subunit 6	yes	2	9.671e-06	149.33	1	52344000
VNFTVDQIR	9	0	1090.58	P13639;Q6PK56;B4DPU3;B4DRE8;B4DMC6	P13639	2	10	EEF2	Elongation factor 2	yes	2	0.00067642	143.61	1	142210000
VNPLSLVEIILHVVR	15	0	1700.03	A0A024R201;J3KNQ3;Q53GN6;Q9Y6E3;Q9UNM6;B2RBM7;A0A087WUL9;B4DJ66;E9PL38;E9PQG3	A0A024R201	71	85	PSMD13	26S proteasome non-ATPase regulatory subunit 13	yes	2;3	6.4159e-12	114.83	2	240020000
VNPYEEVDQEKYSNLVQSVLSSR	23	1	2682.31	Q9BQP7;Q5QPE7;Q5QPE8	Q9BQP7	41	63	MGME1	Mitochondrial genome maintenance exonuclease 1	yes	3	0.0030953	40.937	1	39350000
VPAINVNDSVTK	12	0	1255.68	Q1RMG2;P23526	Q1RMG2	49	60	AHCY	Adenosylhomocysteinase	yes	2	0.0002878	81.017	1	0
VPDSTYEMIGGLDK	14	0	1523.72	A0A140VJS3;P62195;Q59GS3;J3KRP2;J3QSA9;J3QQM1;J3QLH6;J3QRW1;J3QSE0	A0A140VJS3	143	156	PSMC5	26S protease regulatory subunit 8	yes	2	2.7675e-05	83.137	1	706670000
VPFCPMVGSEVYSTEIK	17	0	1884.9	B5BUB1;Q9Y265;E7ETR0;B3KRS7	B5BUB1	91	107	RUVBL1	RuvB-like 1	yes	2	0.00082081	51.727	1	0
VPGLPTPIENMILR	14	0	1548.87	Q6P2Q9;I3L0J9	Q6P2Q9	728	741	PRPF8	Pre-mRNA-processing-splicing factor 8	yes	2	9.2894e-06	94.309	1	64607000
VPLPSLSPTMQAGTIAR	17	0	1737.94	B4E1P6;B4DLQ2;H0YDD4;E9PEJ4;B4DJX1;Q86YI5;A0A024R3D8;P10515	B4E1P6	94	110	DLAT	Acetyltransferase component of pyruvate dehydrogenase complex;Dihydrolipoyllysine-residue acetyltransferase component of pyruvate dehydrogenase complex, mitochondrial	yes	2	1.0155e-07	92.925	1	43758000
VPYPVFESNPEFLYVEGLPEGIPFR	25	0	2894.45	X5D2J9;Q499G6;X5D939;X5DNP5;B4DH52;X5DR09;P78347;B4DRA9	X5D2J9	554	578	GTF2I	General transcription factor II-I	yes	2	0.0040671	45.33	1	53320000
VQAAEHTLR	9	0	1023.55	C9J5W5;C9JRV9;E7EWE1;E7EQ61;Q9GZZ9	C9J5W5	72	80	UBA5	Ubiquitin-like modifier-activating enzyme 5	yes	2	0.013534	78.334	1	60641000
VQELGLSAPLTVLPTITCGHTIEILR	26	0	2773.54	P0DN79;P35520;B7Z2D6;B7Z6W5;Q9NTF0;Q96EH7;H7C2H4	P0DN79	414	439	CBS;DKFZp727E011	Cystathionine beta-synthase	yes	2;3	5.9e-08	71.085	2	0
VQIEHISSLIK	11	0	1265.73	O00231	O00231	345	355	PSMD11	26S proteasome non-ATPase regulatory subunit 11	yes	2	0.00093984	93.561	1	87530000
VQISPDSGGLPER	13	0	1353.69	A0A087WTP3;Q92945;B4DV73;M0QXW7;M0QYH3	A0A087WTP3	178	190	KHSRP	Far upstream element-binding protein 2	yes	2	7.0769e-05	70.942	1	0
VQQLLHICSEHFDSK	15	0	1782.87	Q59EG8;Q13200;B4DM22;Q9NSM5;Q13041;H7C1H2	Q59EG8	614	628	PSMD2;DKFZp564A2282	26S proteasome non-ATPase regulatory subunit 2	yes	2;3	2.2606e-07	88.021	2	0
VQQTVQDLFGR	11	0	1289.67	B7Z4V2;V9HW84;P38646;Q8N1C8;B7Z1V7;B7Z4T3;A1XP52	B7Z4V2	381	391	HEL-S-124m;HSPA9	Stress-70 protein, mitochondrial	yes	2	6.8668e-11	179.68	1	246380000
VQREPLLTLVK	11	1	1294.8	Q59EG8;Q13200;Q9NSM5	Q59EG8	184	194	PSMD2;DKFZp564A2282	26S proteasome non-ATPase regulatory subunit 2	yes	3	0.0082852	50.354	1	0
VQSQYFR	7	0	926.461	Q4VCS5	Q4VCS5	114	120	AMOT	Angiomotin	yes	2	0.00078431	155.73	1	42176000
VQVSYKGETK	10	1	1137.6	A8K5I0;A0A0G2JIW1;P0DMV9;P0DMV8;B4DI39;Q9UQC1	A8K5I0	103	112	HEL-S-103;HSPA1B;HSPA1A;HSP70-1	Heat shock 70 kDa protein 1B;Heat shock 70 kDa protein 1A	yes	2	0.0091031	96.948	1	337910000
VQVVGTYR	8	0	920.508	Q53HJ4;B2R7C5;A0A0S2Z4T1;P25205;Q8NHX6;B4DUQ9;J3KQ69;A0A0S2Z492;B4DS46	Q53HJ4	235	242	MCM3;HCC5	DNA helicase;DNA replication licensing factor MCM3	yes	2	6.6953e-16	200.12	1	163100000
VQVYQEPNR	9	0	1131.57	C9JDH0;E7EW35;C9JDU5;C9JJS3;C9K0K7;E7EPA1;B2R7R5;A0A024QYY3;O60256;I3L331;I3L164	C9JDH0	49	57	PRPSAP2	Phosphoribosyl pyrophosphate synthase-associated protein 2	yes	2	0.016134	75.213	1	38092000
VRPCVVYGGADIGQQIR	17	1	1829.96	F6S8Q4;A0A0D9SFB3;A0A2R8YF78;A0A2R8YCW1;A0A0D9SG12;A0A2R8YFR4;A0A2U3TZJ9;A0A2R8YFS5;B5BTY4;A0A2R8Y4A4;Q59GX6;A0A2R8Y645;A0A0D9SF53;O00571;A0A2R8YDT5;A0A2R8Y7T2;A0A2R8Y5G6;Q5S4N1;A0A2R8YDH3;B4DLU5;A0A024R9A4;O15523;B4E010	F6S8Q4	262	278	DDX3X;DDX3Y	ATP-dependent RNA helicase DDX3X;ATP-dependent RNA helicase DDX3Y	yes	2;3	3.8774e-27	199.13	2	0
VSEAYENLVK	10	0	1150.59	Q4VCS5;A6NP16;A2BDD9;E7ERM3	Q4VCS5	472	481	AMOT	Angiomotin	yes	2	0.024213	56.916	1	63669000
VSGSELVQK	9	0	945.513	A0A140VJS3;P62195;Q59GS3;J3KRP2;J3QSA9;J3QQM1;J3QLH6;J3QRR3	A0A140VJS3	214	222	PSMC5	26S protease regulatory subunit 8	yes	2	0.0062703	101.43	1	430740000
VSVADHSLHLSK	12	0	1291.69	V9HW63;Q13162;A6NG45	V9HW63	67	78	HEL-S-97n;PRDX4	Peroxiredoxin-4	yes	2;3	0.000111	110.47	2	707160000
VSVSPVVHVR	10	0	1077.63	C9JJZ7;H7BXH8;A0A0S2Z610;B7WPG3;C9IYN3;A8K894;D6W592;A0A0S2Z6K1;A0A0S2Z5U3;Q8WVV9	C9JJZ7	11	20	HNRNPLL;HNRPLL	Heterogeneous nuclear ribonucleoprotein L-like	yes	2	0.01576	62.546	1	22263000
VTADVINAAEK	11	0	1129.6	A0A286YFL2;A0A286YFA2;B3KSC3;A0A286YF22;A0A2C9F2M7;V9HW79;O43175;A0A286YFM8;A0A286YF34;A0A286YER3;A0A286YFC8;A0A286YFB2	A0A286YFL2	59	69	HEL-S-113;PHGDH	D-3-phosphoglycerate dehydrogenase	yes	2	0.0002053	102.06	1	105980000
VTAIHIDPATHR	12	0	1329.72	A0A0U1RQF0;P49327	A0A0U1RQF0	1052	1063	FASN	Fatty acid synthase;[Acyl-carrier-protein] S-acetyltransferase;[Acyl-carrier-protein] S-malonyltransferase;3-oxoacyl-[acyl-carrier-protein] synthase;3-oxoacyl-[acyl-carrier-protein] reductase;3-hydroxyacyl-[acyl-carrier-protein] dehydratase;Enoyl-[acyl-carrier-protein] reductase;Oleoyl-[acyl-carrier-protein] hydrolase	yes	2	0.00041227	109.88	1	77028000
VTAVIPCFPYAR	12	0	1335.7	B1ALA9;Q53FW2;A0A2R8Y7H4;P60891;B2R860;A0A0B4J207;A0A140VK41;P21108;P11908;A6NMS2;B1ALA7;D3YTJ7	B1ALA9	85	96	PRPS1;PRPS1L1;PRPS2	Ribose-phosphate pyrophosphokinase 1;Ribose-phosphate pyrophosphokinase 3;Ribose-phosphate pyrophosphokinase 2	yes	2	9.3136e-05	107.57	1	0
VTCDQTYLLR	10	0	1210.6	B4DWZ7;B3KTN5;Q9NS86	B4DWZ7	101	110	LANCL2	LanC-like protein 2	yes	2	8.0514e-05	147.29	1	0
VTDALNATR	9	0	959.504	A0A024R3X4;P10809;B3GQS7;B7Z5E7;B7Z4F6;B7Z597	A0A024R3X4	421	429	HSPD1	60 kDa heat shock protein, mitochondrial	yes	2	0.0018142	136.27	1	118440000
VTFDPTSSYTLEDLKPDTLYR	21	1	2460.21	Q59FI2;H0Y6Z7;P10586;H0Y4H1;H0Y7Z9;Q5W9G3;B3KWM1	Q59FI2	215	235	PTPRF;LAR	Receptor-type tyrosine-protein phosphatase F;Protein-tyrosine-phosphatase	yes	3	9.5369e-05	57.009	1	64551000
VTHAVVTVPAYFNDAQR	17	0	1886.96	V9HWB4;P11021;B4DEF7	V9HWB4	165	181	HEL-S-89n;HSPA5	78 kDa glucose-regulated protein	yes	2;3	1.9185e-15	104.94	2	49030000
VTHELQAMKDK	11	1	1298.67	R4GNH3;A0A140VK42;P17980;A8K781;E9PKD5;E9PMD8;E9PN50;E9PLG2	R4GNH3	46	56	PSMC3	26S protease regulatory subunit 6A	yes	2;3	0.00062275	141.88	2	1107600000
VTIASLPR	8	0	855.518	F8W9L6;F5H006;B4DZV0;A0A024RAY9;A0A1B0GU45;Q12912	F8W9L6	318	325	LRMP	Lymphoid-restricted membrane protein;Processed lymphoid-restricted membrane protein	yes	1	0.025782	66.138	1	2055500000
VTLEYRPVIDK	11	1	1331.74	B3KT34;A0A024QZ30;P31040;A0A087X1I3;B3KYA5;D6RFM5	B3KT34	412	422	SDHA	Succinate dehydrogenase [ubiquinone] flavoprotein subunit, mitochondrial	yes	2	0.0020848	91.752	1	40171000
VTSAHKGPDETLR	13	1	1409.73	E9PBS1;A0A024RD93;P22234;D6RF62	E9PBS1	299	311	PAICS	Multifunctional protein ADE2;Phosphoribosylaminoimidazole-succinocarboxamide synthase;Phosphoribosylaminoimidazole carboxylase	yes	2;3	7.8528e-05	96.957	2	126150000
VVDSLYNK	8	0	936.492	O00231	O00231	410	417	PSMD11	26S proteasome non-ATPase regulatory subunit 11	yes	2	0.015549	94.262	1	238890000
VVEHNIR	7	0	865.477	A0A0S2Z489;O00232	A0A0S2Z489	358	364	PSMD12	26S proteasome non-ATPase regulatory subunit 12	yes	2	0.026761	89.703	1	174740000
VVGSEFVQK	9	0	991.534	A8K2M0;P43686	A8K2M0	230	238	PSMC4	26S protease regulatory subunit 6B	yes	2	0.0063707	98.523	1	2451000000
VVGSELIQK	9	0	971.565	Q53XL8;Q53HB3;P62191	Q53XL8	250	258	PSMC1	26S protease regulatory subunit 4	yes	2	0.014173	77.282	1	675900000
VVGVLLGSWQK	11	0	1184.69	P51665;B2RD27;H3BNT7;H3BTM8	P51665	35	45	PSMD7	26S proteasome non-ATPase regulatory subunit 7	yes	2	0.00066736	108.74	1	70726000
VVHLGDKEQSNWAK	14	1	1609.82	B3KW17;H7C5E4;Q8IZH2	B3KW17	620	633	XRN1	5-3 exoribonuclease 1	yes	3	0.012386	43.405	1	23112000
VVLIGGKPDR	10	1	1052.63	B4DUQ1;A0A024R228;P61978;B4DFF1;Q5EC54;Q5T6W2	B4DUQ1	168	177	HNRPK;HNRNPK	Heterogeneous nuclear ribonucleoprotein K	yes	2;3	0.00057874	113.1	2	1037700000
VVPTTDHIDTEK	12	0	1353.68	O75663	O75663	129	140	TIPRL	TIP41-like protein	yes	2	1.6365e-05	91.658	1	0
VVSSSIVDK	9	0	932.518	A0A087X2I1;P62333;V9HW24;H0YJC0;H0YJS8	A0A087X2I1	212	220	PSMC6;HEL-S-73	26S protease regulatory subunit 10B	yes	2	0.007883	87.639	1	342050000
VVVHPLVLLSVVDHFNR	17	0	1942.12	P51665;B2RD27;H3BNT7;H3BTM8;H3BQV2	P51665	9	25	PSMD7	26S proteasome non-ATPase regulatory subunit 7	yes	2;4	2.2711e-12	154.72	2	385940000
VVVQVLAEEPEAVLK	15	0	1621.93	A0A0U1RQF0;P49327	A0A0U1RQF0	1850	1864	FASN	Fatty acid synthase;[Acyl-carrier-protein] S-acetyltransferase;[Acyl-carrier-protein] S-malonyltransferase;3-oxoacyl-[acyl-carrier-protein] synthase;3-oxoacyl-[acyl-carrier-protein] reductase;3-hydroxyacyl-[acyl-carrier-protein] dehydratase;Enoyl-[acyl-carrier-protein] reductase;Oleoyl-[acyl-carrier-protein] hydrolase	yes	2	0.013478	54.471	1	134900000
VVWVEESDKR	10	1	1245.64	F6S8Q4;A0A0D9SFB3;A0A2R8YF78;A0A2R8YCW1;A0A0D9SG12;A0A2R8YFR4;A0A2U3TZJ9;A0A2R8YFS5;B5BTY4;A0A2R8Y4A4;Q59GX6;A0A2R8Y645;A0A0D9SF53;O00571;A0A2R8YDT5;A0A2R8Y7T2;A0A2R8Y5G6;Q5S4N1;A0A2R8YDH3	F6S8Q4	386	395	DDX3X	ATP-dependent RNA helicase DDX3X	yes	2;3	0.0047338	92.439	2	495000000
VYAILTHGIFSGPAISR	17	0	1800.99	B1ALA9;Q53FW2;A0A2R8Y7H4;P60891;B2R860;A0A0B4J207;A0A140VK41;P21108;P11908;B7ZB02;H7C540	B1ALA9	211	227	PRPS1;PRPS1L1;PRPS2	Ribose-phosphate pyrophosphokinase 1;Ribose-phosphate pyrophosphokinase 3;Ribose-phosphate pyrophosphokinase 2	yes	2	5.7832e-08	138.99	1	121690000
VYALPEDLVEVKPK	14	1	1598.89	B4DPW9;Q53GY0;P13797;A0A0A0MSQ0;Q96HI1;B4DG31;B4DI60;A7E2S2	B4DPW9	573	586	PLS3	Plastin-3	yes	2;3	5.997e-05	72.891	2	81884000
VYEFLDKLDVVR	12	1	1494.81	Q6IBN0;O43242;B3KNN7;Q96N86;B4DV84;B4DEB0;B4DPM7;Q8N9M2;H0YGV8	Q6IBN0	217	228	PSMD3	26S proteasome non-ATPase regulatory subunit 3	yes	2;3	0.00013686	122.26	2	359280000
VYVINKEICVR	11	1	1334.74	A0A024RA94;P55001	A0A024RA94	129	139	MFAP2	Microfibrillar-associated protein 2	yes	2	0.021917	40.352	1	0
WDETKGEDNIDFMPTILSR	19	1	2266.06	B1AHB0;P33992;Q53FG5;B1AHB1;B4DQ39;B3KVF0;B4DVK5;Q59F49	B1AHB0	495	513	MCM5	DNA helicase;DNA replication licensing factor MCM5	yes	2;3	2.5611e-10	78.373	2	214930000
WFLTCINQPQFR	12	0	1551.77	Q53YD7;P26641	Q53YD7	190	201	EEF1G	Elongation factor 1-gamma	yes	2	0.00018125	131.44	1	0
WLPLGLGLNHLGK	13	0	1416.82	Q59EG8;Q13200;B4DM22;Q9NSM5;Q13041;H7C1H2	Q59EG8	562	574	PSMD2;DKFZp564A2282	26S proteasome non-ATPase regulatory subunit 2	yes	2	0.0014862	63.184	1	398260000
WNQDTMEQK	9	0	1178.5	A0A024R588;A0A024R566;B4DJU4;A0A024R5D9;A0A024R572;Q15637;B4DSE4;Q14820;F8WEV5	A0A024R588	22	30	SF1	Splicing factor 1	yes	2	0.028192	64.207	1	104720000
WSTLVEDYGMELR	13	0	1597.74	A0A0S2Z489;O00232	A0A0S2Z489	317	329	PSMD12	26S proteasome non-ATPase regulatory subunit 12	yes	2	0.00016558	124.1	1	90316000
WTELGALDILQMLGR	15	0	1714.91	Q9H8B9;A4FU77;O75643	Q9H8B9	516	530	SNRNP200	U5 small nuclear ribonucleoprotein 200 kDa helicase	yes	2	1.8343e-07	90.653	1	29976000
YAFVNWINK	9	0	1153.59	B4DPW9;Q53GY0;P13797;A0A0A0MSQ0;U3KQI3;Q59GX5;V9HWJ7;Q53FI1;A0A024RDT4;P13796;Q5TBN3	B4DPW9	100	108	PLS3;HEL-S-37;LCP1	Plastin-3;Plastin-2	yes	2	0.010328	83.614	1	44887000
YANVIAYDHSR	11	0	1307.63	Q59FI2;H0Y6Z7;P10586;H0Y4H1;H0Y7Z9;Q5W9G3;Q7Z3X4;B3KWM1;B3KXA8;H0Y380;B3KXJ7;B4DK48;Q59H90;Q3KPI9;G8JL96;Q9UM81;F5GWR7;A0A0A0MR60;Q59FX6;Q2HXI4;P23468;Q13332;A8E4L7	Q59FI2	1026	1036	PTPRF;LAR;DKFZp686B1310;PTPRD;PTPRS;PTPsigma	Receptor-type tyrosine-protein phosphatase F;Protein-tyrosine-phosphatase;Receptor-type tyrosine-protein phosphatase delta;Receptor-type tyrosine-protein phosphatase S	yes	2;3	0.00019501	130.66	2	342730000
YAVSMAR	7	0	796.39	B4DPW9;Q53GY0;P13797;A0A0A0MSQ0;Q96HI1;B4DG31;B4DI60;A7E2S2	B4DPW9	561	567	PLS3	Plastin-3	yes	2	0.0038816	149.06	1	145190000
YDAVQHCR	8	0	990.434	H7BZN1;H7C1T3;C9J2E1;D3DXB2;C9J050;B4E322;B2R8P1;C9JEJ2;P49585	H7BZN1	6	13	PCYT1A;hCG_2002711	Choline-phosphate cytidylyltransferase A	yes	2	0.0055556	91.041	1	0
YDDMAACMK	9	0	1046.39	D0PNI1;E7EX29;P63104;E5RGE1;Q6LD62;E5RIR4;E9PD24;E7EVZ2;E7ESK7	D0PNI1	19	27	YWHAZ;14-3-3 protein	14-3-3 protein zeta/delta	yes	2	0.0078297	65.88	1	0
YDDMATCMK	9	0	1076.4	P27348;E9PG15;Q3YBA8;Q53RR5	P27348	19	27	YWHAQ	14-3-3 protein theta	yes	2	0.0032821	82.426	1	0
YDMAEDLLKR	10	1	1252.61	H9KV93;B3KU32;A8KA77;Q7Z4L5	H9KV93	180	189	TTC21B	Tetratricopeptide repeat protein 21B	yes	2	0.023068	41.652	1	0
YDWDLLAAR	9	0	1121.55	Q8IXJ3;B4DZB1;B3KX19;Q6IBM8;A8KAP3;Q15029;K7EP67;B3KWY2;K7EJ74	Q8IXJ3	600	608	SNRP116;U5-116KD;EFTUD2	116 kDa U5 small nuclear ribonucleoprotein component	yes	2	0.006449	96.253	1	32169000
YEEIVKEVSTYIK	13	1	1599.84	Q6IPT9;Q6IPS9;Q6IPN6;Q53HR5;Q53HQ7;Q53HM9;Q5VTE0;P68104;Q96RE1;A0A087WVQ9;A8K9C4;Q53GA1;Q8IUB0;B4DV42;Q504Z0;Q53HR1;A0A087WV01;Q9H2I7;Q53G89;B4E2C5;A9X7H1;Q16577	Q6IPT9	167	179	EEF1A1;EEF1A1P5;EEF1A1L14;PTI-1	Elongation factor 1-alpha;Putative elongation factor 1-alpha-like 3;Elongation factor 1-alpha 1	yes	2	6.2421e-05	89.171	1	42021000
YEPPVPTR	8	0	957.492	Q53XL8;Q53HB3;P62191	Q53XL8	25	32	PSMC1	26S protease regulatory subunit 4	yes	2	0.01761	101.64	1	52000000
YEWDVAEAR	9	0	1137.51	P13639;Q8TA90;B4DPU3;Q6W6M8	P13639	639	647	EEF2	Elongation factor 2	yes	2	4.9703e-08	169.06	1	88128000
YFDPANGK	8	0	910.418	P13639;Q6PK56;B4DRE8;B4DMC6	P13639	265	272	EEF2	Elongation factor 2	yes	2	0.016709	98.415	1	130930000
YFPTQALNFAFK	12	0	1445.73	A8K787;A0A0S2Z3H3;P12235;A0A0S2Z359;V9GYG0;Q9H0C2;Q59EP7;Q6NVC0;P05141;Q6I9V5;P12236;Q59EI9	Q6NVC0	106	117	SLC25A4;SLC25A31;SLC25A5;SLC25A6	ADP/ATP translocase 1;ADP/ATP translocase 4;ADP/ATP translocase 4, N-terminally processed;ADP/ATP translocase 2;ADP/ATP translocase 2, N-terminally processed;ADP/ATP translocase 3;ADP/ATP translocase 3, N-terminally processed	no	2	0.00012969	100.02	1	571180000
YGCLAGVR	8	0	837.417	A5PLK7;A0A024RAC5;Q9P258	A5PLK7	77	84	RCC2	Protein RCC2	yes	2	0.0026712	121.68	1	0
YGDGGSSFQSTTGHCVHMR	19	0	2025.84	P55795;B4DFK9;B4DP00	P55795	276	294	HNRNPH2	Heterogeneous nuclear ribonucleoprotein H2	yes	2;3;4	9.9268e-10	113.47	3	0
YGDGGSTFQSTTGHCVHMR	19	0	2039.86	E9PCY7;G8JLB6;P31943;D6RIT2;H0YB39;B4DP51;H0YBG7;Q68DG4;H0YBD7	E9PCY7	276	294	HNRNPH1;DKFZp686A15170	Heterogeneous nuclear ribonucleoprotein H;Heterogeneous nuclear ribonucleoprotein H, N-terminally processed	yes	2;3;4	5.4573e-05	61.821	3	0
YGEPTLR	7	0	834.424	Q59EG8;Q13200;B4DM22;Q13041;H7C1H2	Q59EG8	686	692	PSMD2	26S proteasome non-ATPase regulatory subunit 2	yes	2	0.024949	126.24	1	282700000
YGGEAQMR	8	0	910.397	E9PF10;A0A024R071;O75694;B4DLT2	E9PF10	576	583	NUP155	Nuclear pore complex protein Nup155	yes	2	0.015549	94.262	1	50168000
YHIEVNR	7	0	929.472	Q8IXJ3;B4DZB1;B3KX19;Q6IBM8;A8KAP3;Q15029;B3KWY2	Q8IXJ3	415	421	SNRP116;U5-116KD;EFTUD2	116 kDa U5 small nuclear ribonucleoprotein component	yes	2	0.017366	94.163	1	0
YIDTEHGGSQAR	12	0	1332.61	F5H365;B4DSQ5;Q15436;B4DF60	F5H365	676	687	SEC23A	Protein transport protein Sec23A	yes	2	0.029757	50.353	1	93299000
YILNVTPNLPNFFEK	15	0	1807.95	Q6P9C2;B2RAL9;Q99956;Q8N4A4	Q6P9C2	232	246	DUSP9	Dual specificity protein phosphatase;Dual specificity protein phosphatase 9	yes	2	0.00017512	66.262	1	87029000
YIQPWESEFIDSQR	14	0	1796.84	Q6P2Q9;B4DK16	Q6P2Q9	1371	1384	PRPF8	Pre-mRNA-processing-splicing factor 8	yes	2	2.7984e-05	83.045	1	63307000
YIQQTKPLTLER	12	1	1488.83	Q5HYH5;B2R6U8;A0A024R6W2;O43809	Q5HYH5	24	35	DKFZp313O211;NUDT21	Cleavage and polyadenylation specificity factor subunit 5	yes	2;3	0.00015203	147.75	2	93594000
YKPQPLINHAPR	12	1	1432.79	F5H6Z0;B4DGP5;A0A024RBH0;Q00537	F5H6Z0	377	388	CDK17;PCTK2	Cyclin-dependent kinase 17	yes	3	0.0039207	52.247	1	43084000
YLAEFATGNDRK	12	1	1383.68	V9HW98;G9K389;G9K388;P62258;B7ZA86;K7EM20;B3KT37	V9HW98	131	142	HEL2;YWHAE/FAM22B fusion;YWHAE/FAM22A fusion;YWHAE	14-3-3 protein epsilon	yes	2	0.0017233	121.64	1	53425000
YLAEVAAGDDKK	12	1	1278.65	D0PNI1;E7EX29;P63104;B7Z2E6;H0YB80;B0AZS6	D0PNI1	128	139	YWHAZ	14-3-3 protein zeta/delta	yes	2;3	0.00029915	137.98	2	196750000
YLAEVACGDDRK	12	1	1338.62	P27348;B4DY04;Q53S41;B4DMT8;E9PG15	P27348	128	139	YWHAQ	14-3-3 protein theta	yes	2	0.011194	46.406	1	0
YLGEGPR	7	0	790.397	A8K2M0;P43686	A8K2M0	239	245	PSMC4	26S protease regulatory subunit 6B	yes	2	0.015948	134.12	1	164420000
YLPELMAEKDSLDPSFTHAMQLLTAEIEK	29	1	3319.64	B4E043;B4DDX2;Q07666	B4E043	7	35	KHDRBS1	KH domain-containing, RNA-binding, signal transduction-associated protein 1	yes	3;4	0.0096464	34.558	2	1152800000
YLPHSAGR	8	0	899.461	M0R0F0;Q53G25;A0A024R4Q8;M0R0R2;P46782	M0R0F0	48	55	RPS5	40S ribosomal protein S5;40S ribosomal protein S5, N-terminally processed	yes	2	0.012971	114.19	1	73482000
YLSEVASGDNK	11	0	1181.56	V9HWD6;B5BU24;P31946	V9HWD6	130	140	HEL-S-1;YWHAB	14-3-3 protein beta/alpha;14-3-3 protein beta/alpha, N-terminally processed	yes	2	8.1516e-07	100.25	1	0
YLTVAAVFR	9	0	1038.59	B4DE77;P04350;B4DJ43;B4DFH6;B7ZAF0;Q5JP53;Q5SU16;P07437;Q5ST81;Q6LC01;B4DY90;B7ZAK1;Q9BUU9;B4E052;Q96B85;B4DXZ5;B4DMU8;Q1KSF8;Q8IZ29;Q8IWP6;P68371;Q8N6N5;B3KML9;Q96HX0;A4UCT2	B7ZAF0	281	289	TUBB4A;TUBB;XTP3TPATP1;TUBB2C;TUBB4B	Tubulin beta-4A chain;Tubulin beta chain;Tubulin beta-4B chain	no	2	0.0022882	133.81	1	72683000
YMDLLWR	7	0	995.49	E9PF10;A0A024R071;O75694;B4DLT2;B3KMK3	E9PF10	1013	1019	NUP155	Nuclear pore complex protein Nup155	yes	2	0.021227	129.16	1	53232000
YNFPNPNPFVEDDMDKNEIASVAYR	25	1	2944.33	B4E1K8;O15371	B4E1K8	238	262	EIF3D	Eukaryotic translation initiation factor 3 subunit D	yes	3	0.001902	41.208	1	50243000
YNPTWHCIVGR	11	0	1344.64	Q6FGH9;Q96FJ2;P63167	Q6FGH9	50	60	DNCL1;DYNLL2;DYNLL1	Dynein light chain 2, cytoplasmic;Dynein light chain 1, cytoplasmic	yes	2	0.0070703	52.591	1	0
YPALTKPENQDIDWTLLEGETR	22	1	2588.28	B4DPW9;Q53GY0;P13797;A0A0A0MSQ0;Q96HI1;B4DG31;H7C4N2	B4DPW9	350	371	PLS3	Plastin-3	yes	2;3	9.8011e-09	101.36	2	488670000
YPIEHGIITNWDDMEK	16	0	1959.9	B7Z6P1;A8K3K1;P68133;P68032;Q7Z7J6;A6NL76;D2JYH4;P63267;P62736;Q13707;B3KW67;B4DUI8;F8WB63;B8ZZJ2;C9JFL5;F6UVQ4;F6QUT6;B7Z6I1	B7Z6P1	71	86	ACTA1;ACTC1;ACTA2;ACTG2	Actin, alpha skeletal muscle;Actin, alpha cardiac muscle 1;Actin, gamma-enteric smooth muscle;Actin, aortic smooth muscle	yes	3	0.029276	19.672	1	527140000
YQEAAPNVANNTGPHAASCFGAK	23	0	2317.05	Q96FS1;Q68DU0;C9JZR2;O60716;Q7KZJ3;A0A024R4Z0;A0A024R4Y7	Q96FS1	497	519	CTNND1;DKFZp781O2021	Catenin delta-1	yes	3	3.3423e-05	58.904	1	0
YQEALHLGSQLLR	13	0	1526.82	O00231;B4DTS5	O00231	143	155	PSMD11	26S proteasome non-ATPase regulatory subunit 11	yes	2	2.085e-05	96.229	1	49357000
YQIHIPLPPK	10	0	1204.7	A0A140VK70;P35998;A0A1W2PQS1;Q75L23	A0A140VK70	147	156	PSMC2	26S protease regulatory subunit 7	yes	2	0.013078	65.246	1	34473000
YRDELKR	7	2	978.525	B1AHB0;P33992;Q53FG5;A8K521;B1AHB1;B3KVF0	B1AHB0	55	61	MCM5	DNA helicase;DNA replication licensing factor MCM5	yes	2	0.00066547	166.05	1	194150000
YRNPVSQCMR	10	1	1252.58	K7EJM5;A0A0A0N0N3;A0A087WX29;A0A0A0N0M3;K7EN94;B1AKP7;G3V162;A0A087X260;A0A087WYY0;A0A0A0N0L3;A0A024R4E2;Q13148;K7EJ99;A0A0A0MSV7;A0A1W2PNU8	K7EJM5	43	52	TARDBP;TDP43	TAR DNA-binding protein 43	yes	2	0.0022456	85.716	1	0
YSIGGLSPFSEYAFR	15	0	1692.81	Q59FI2;H0Y6Z7;P10586;H0Y4H1	Q59FI2	30	44	PTPRF	Receptor-type tyrosine-protein phosphatase F	yes	2	0.00025244	64.199	1	0
YTCGEAPDYDR	11	0	1288.5	A4UJ43;A0A0A0MTN3;Q6FGJ9;Q59EJ5;P21266	A4UJ43	37	47	GSTM3	Glutathione S-transferase Mu 3	yes	2	0.016228	45.137	1	0
YTLNVLEDLGDGQK	14	0	1563.78	B4DPW9;Q53GY0;P13797;A0A0A0MSQ0;Q96HI1;B4DG31;B4DI60;A7E2S2	B4DPW9	478	491	PLS3	Plastin-3	yes	2	6.014e-05	129.88	1	71166000
YTQPNICR	8	0	993.47	Q4ZG57;Q14566	Q4ZG57	138	145	MCM6	DNA replication licensing factor MCM6	yes	2	0.0042181	111.28	1	0
YTRPTPVQK	9	1	1088.6	F6S8Q4;A0A0D9SFB3;A0A2R8YF78;A0A2R8YCW1;A0A0D9SG12;A0A2R8YFR4;A0A2U3TZJ9;A0A2R8YFS5;B5BTY4;A0A2R8Y4A4;Q59GX6;A0A2R8Y645;A0A0D9SF53;O00571;A0A2R8YDT5;A0A2R8Y7T2;A0A2R8Y5G6;A0A2R8YDH3;B4DLU5;A0A024R9A4;O15523;B4E010;B4E3C4;A0A2R8Y4D2;C9J8G5;C9J081	F6S8Q4	200	208	DDX3X;DDX3Y	ATP-dependent RNA helicase DDX3X;ATP-dependent RNA helicase DDX3Y	yes	3	0.0026557	69.915	1	91862000
YVASYLLAALGGNSSPSAK	19	0	1867.97	A0A024RCA7;P05387	A0A024RCA7	3	21	RPLP2	60S acidic ribosomal protein P2	yes	2	0.0012931	52.265	1	32851000
YVGEGAR	7	0	750.366	A0A140VK70;P35998;A0A1W2PQS1;Q75L23	A0A140VK70	249	255	PSMC2	26S protease regulatory subunit 7	yes	2	0.03453	119.06	1	107060000
YVGESEANIR	10	0	1136.55	B7Z9U2;B4DH19;B4DGR3;B4DSK5;I3L0N3;B7Z5J7;P46459	B7Z9U2	200	209	NSF	Vesicle-fusing ATPase	yes	2	0.0032596	87.639	1	21099000
YVHPLTEEAIEEMERDGLER	20	1	2415.14	B4DSA4;Q7KZA3;Q53FU1;Q5TZY0;P22830;K7ELX4	B4DSA4	23	42	DKFZp686P18130;FECH	Ferrochelatase;Ferrochelatase, mitochondrial	yes	3	0.0072341	38.888	1	49524000
YVLCTAPR	8	0	921.474	Q53HJ4;B2R7C5;A0A0S2Z4T1;P25205;Q8NHX6;B4DUQ9;J3KQ69;A0A0S2Z492;B4DS46	Q53HJ4	357	364	MCM3;HCC5	DNA helicase;DNA replication licensing factor MCM3	yes	2	4.1249e-05	153.15	1	0
YVLKPATEGK	10	1	1104.62	H0Y2W2;Q9NVI7;Q5SV16	H0Y2W2	478	487	ATAD3A	ATPase family AAA domain-containing protein 3A	yes	2	0.0080823	100.02	1	49613000
YVLVAGITPTPLGEGK	16	0	1613.9	B2RD24;A0A087WVM4;B7ZM99;Q6UB35	B2RD24	169	184	MTHFD1L	Monofunctional C1-tetrahydrofolate synthase, mitochondrial	yes	2	5.8402e-09	86.313	1	37105000
YVPYVGDSKR	10	1	1182.6	A0A140VK73;Q9NPH2;B3KSG0;B7Z3K3;J3QS51	A0A140VK73	385	394	ISYNA1	Inositol-3-phosphate synthase 1	yes	2;3	0.00081681	124.98	2	73462000
YYETGSIRPR	10	1	1240.62	A0A1W2PRS6;A0A1W2PQL7;A0A1W2PRA4;Q59GD2;A0A1W2PQM7;A0A1W2PS91;D1KF47;A0A1W2PSA8;A0A1W2PPN2;E9PKM0;A0A1W2PQA8;Q66SS1;B3KQG1;F1T0F8;D3DQZ8;A0A1W2PQG7;P26367;E5LBD7;Q2XU31;Q7Z5Y4;Q56H36;A0A1W2PQW3;B1B1J0	A0A1W2PRS6	61	70	PAX6	Paired box protein Pax-6	yes	2	0.0076466	101.33	1	43936000
YYQTIGNHASYYK	13	0	1606.74	A0A024R201;J3KNQ3;Q53GN6;Q9Y6E3;Q9UNM6;B2RBM7;A0A087WUL9;B4DJ66;E9PL38;H0YD73	A0A024R201	162	174	PSMD13	26S proteasome non-ATPase regulatory subunit 13	yes	3	0.025796	33.685	1	451480000
YYVTIIDAPGHR	12	0	1403.72	Q6IPT9;Q6IPS9;Q6IPN6;Q53HR5;Q53HQ7;Q53HM9;Q5VTE0;P68104;Q96RE1;A0A087WVQ9;A8K9C4;Q53GA1;Q53GE9;Q53G85;B4DNE0;B4DV42;Q9NZS6;A0A087WV01;Q9H2I7;A9X7H1;Q16577;A6PW80;Q5JR01	Q6IPT9	85	96	EEF1A1;EEF1A1P5;EEF1A1L14;PTI-1	Elongation factor 1-alpha;Putative elongation factor 1-alpha-like 3;Elongation factor 1-alpha 1	yes	2;3	5.8386e-08	117.14	2	172640000

## Sheet: PSMD10+NleE proteinGroups
Protein IDs	Majority protein IDs	Protein names	Gene names	Number of proteins	Peptides	Razor + unique peptides	Unique peptides	Sequence coverage [%]	Mol. weight [kDa]	Sequence length	Score	Intensity	Methyl (C) site positions
O75832;B1AJY7	O75832;B1AJY7	26S proteasome non-ATPase regulatory subunit 10	PSMD10	2	29	29	4	96	24.428	226	323.31	626000000000
A8K2M0;P43686	A8K2M0;P43686	26S protease regulatory subunit 6B	PSMC4	2	29	29	29	77.5	47.366	418	262.78	31894000000
Q13200;Q59EG8;B4DM22;Q9NSM5;Q13041;H7C1H2;H7C2Q3;C9JPC0	Q13200;Q59EG8;B4DM22;Q9NSM5;Q13041	26S proteasome non-ATPase regulatory subunit 2	PSMD2;DKFZp564A2282	8	34	34	34	49	100.2	908	301.38	31319000000
P13639;Q8TA90;B4DPU3;Q6PK56;B4DRE8;B4DMC6;Q6W6M8;K7EJ74	P13639;Q8TA90;B4DPU3;Q6PK56	Elongation factor 2	EEF2	8	35	35	34	51.5	95.337	858	299.35	22279000000
P63261;B4E3A4;Q8WVW5;Q53GK6;Q53G99;Q53G76;Q1KLZ0;P60709;B4DVQ0;B4DW52;B4E335;A0A2R8Y793;B3KWQ3;Q6PJ43;B7ZAP6;V9HVZ7;Q96DE1;Q96FU6;I3L3I0;I3L1U9;F1BXA6;A4UCT3;A5GZ75;I3L4N8;K7EM38;I3L3R2;J3KT65;Q562R1;A1E282;G5E9R0;E7EVS6;A0A2R8YGF8;Q6S8J3;A5A3E0;Q9UE89;A0A2R8YFE2;C9JUM1;C9JZR7;A0A2R8YEA7;P0CG38;C9JTX5;Q562Z7;Q562Y6;Q562X9;Q562S0;Q562N8;Q562N0;Q562L5;L0R5C4;Q9BYX7;P0CG39;F8WCH0;K4EQ44;K4EP00;K4ENJ…	P63261;B4E3A4;Q8WVW5;Q53GK6;Q53G99;Q53G76;Q1KLZ0;P60709;B4DVQ0;B4DW52;B4E335;A0A2R8Y793;B3KWQ3;Q6PJ43;B7ZAP6;V9HVZ7;Q96DE1;Q96FU6;I3L3I0;I3L1U9	Actin, cytoplasmic 2;Actin, cytoplasmic 2, N-terminally processed;Actin, cytoplasmic 1;Actin, cytoplasmic 1, N-terminally processed	ACTG1;PS1TP5BP1;ACTB;HEL-176	100	18	18	9	61.3	41.792	375	166	19743000000
A8K5I0;A0A0G2JIW1;P0DMV9;P0DMV8;A0A1U9X7W4;B4DNT8;Q59EJ3;B4DI39;B4DWK5;B4DFN9;B4E1S9;B4E388;B4DVU9;V9GZ37;B3KTT5;B4E1T6;B4DNX1;Q53FA3;B2RCQ9;A0A1U9X7X9;A0A1U9X7X4;A0A1U9X7W7;B4DI54;P34931;Q9UQC1;B4DXY3;B4DNV4	A8K5I0;A0A0G2JIW1;P0DMV9;P0DMV8;A0A1U9X7W4;B4DNT8;Q59EJ3;B4DI39;B4DWK5;B4DFN9;B4E1S9;B4E388;B4DVU9;V9GZ37;B3KTT5;B4E1T6;B4DNX1	Heat shock 70 kDa protein 1B;Heat shock 70 kDa protein 1A	HEL-S-103;HSPA1B;HSPA1A	27	30	30	23	54.4	70.051	641	255.14	18462000000
A0A140VJS3;P62195;Q59GS3;J3QQM1;J3QSA9;J3KRP2;J3QLH6;J3QRW1;J3QSE0;J3QRR3;J3KTQ9;Q8NB90	A0A140VJS3;P62195;Q59GS3;J3QQM1	26S protease regulatory subunit 8	PSMC5	12	25	25	25	63.1	45.626	406	240.85	16221000000
Q53XL8;Q53HB3;P62191;G3V4X1	Q53XL8;Q53HB3;P62191	26S protease regulatory subunit 4	PSMC1	4	18	18	18	49.1	49.184	440	174.24	14629000000
Q6IBN0;O43242;B3KNN7;B4DEB0;Q96N86;B4DV84;Q8N9M2;B4DPM7;O95325;H0YGV8	Q6IBN0;O43242;B3KNN7;B4DEB0;Q96N86;B4DV84;Q8N9M2;B4DPM7	26S proteasome non-ATPase regulatory subunit 3	PSMD3	10	27	27	27	54.1	60.945	534	238.22	14396000000
V9HW22;Q53GZ6;P11142;E9PKE3;Q96IS6;B3KTV0;E9PNE6;Q53HF2;B4E1Q1;E9PN89;A8K7Q2;E9PQQ4;E9PQK7;E9PK54;E9PLF4;B4DTX2;E9PPY6;E9PS65;Q96BE0;Q96H53;A0A024R6B5;P54652;E9PN25;E9PM13;Q9NZ87;Q9NWW3;E9PI65;A4D111;B3KUS2	V9HW22;Q53GZ6;P11142;E9PKE3;Q96IS6;B3KTV0;E9PNE6;Q53HF2;B4E1Q1;E9PN89;A8K7Q2	Heat shock cognate 71 kDa protein	HEL-S-72p;HSPA8	29	29	26	24	43.8	70.897	646	245.08	11528000000
Q53GN6;A0A024R201;Q9Y6E3;Q9UNM6;J3KNQ3;B2RBM7;A0A087WUL9;B4DJ66;E9PL38;H0YD73;Q9UNM7;E9PQG3;E9PPD2;Q5HYL3;F8W8J6	Q53GN6;A0A024R201;Q9Y6E3;Q9UNM6;J3KNQ3;B2RBM7;A0A087WUL9;B4DJ66;E9PL38;H0YD73	26S proteasome non-ATPase regulatory subunit 13	PSMD13	15	17	17	17	48.7	42.917	376	143.96	11267000000
B7Z4V2;V9HW84;P38646;Q8N1C8;B7Z1V7;B7Z4T3;A1XP52;Q2F839;D6RJI2;D6RA73;H0YBG6;H0Y8S0	B7Z4V2;V9HW84;P38646;Q8N1C8;B7Z1V7;B7Z4T3	Stress-70 protein, mitochondrial	HEL-S-124m;HSPA9	12	26	25	25	43.6	72.4	665	215.19	9446700000
Q6IPT9;Q6IPS9;Q6IPN6;Q53HR5;Q53HQ7;Q53HM9;A8K9C4;Q5VTE0;P68104;Q96RE1;A0A087WVQ9;Q53GA1;Q53GE9;Q53G85;Q8IUB0;B4DNE0;B4DV42;Q9NZS6;Q53G89;Q504Z0;Q53HR1;A0A087WV01;Q9H2I7;Q96C29;Q8TBL1;Q6P082;Q96CD8;Q6P4C9;B4E2C5;Q16577;A9X7H1;A0A2U3TZH3;Q05639;Q59GP5;Q2F837;A6PW80;Q5JR01;Q96EB3;A0A2R8Y488;Q14222;A0A2R8YDN5;Q6NSH7;A0A2R8Y660	Q6IPT9;Q6IPS9;Q6IPN6;Q53HR5;Q53HQ7;Q53HM9;A8K9C4;Q5VTE0;P68104;Q96RE1;A0A087WVQ9;Q53GA1;Q53GE9;Q53G85;Q8IUB0;B4DNE0;B4DV42;Q9NZS6;Q53G89;Q504Z0;Q53HR1;A0A087WV01;Q9H2I7;Q96C29;Q8TBL1;Q6P082;Q96CD8;Q6P4C9;B4E2C5;Q16577	Elongation factor 1-alpha;Putative elongation factor 1-alpha-like 3;Elongation factor 1-alpha 1	EEF1A1;EEF1A1P5;EEF1A1L14;PTI-1	43	10	10	10	30.1	50.184	462	105.83	9357200000
A0A140VK70;P35998;Q75L23;A0A1W2PQS1;C9JLS9;B7Z571;D6RAE5;D6R9M8;Q59G18;A0A024RAP4;Q9UBT6	A0A140VK70;P35998;Q75L23;A0A1W2PQS1	26S protease regulatory subunit 7	PSMC2	11	30	30	30	65.4	48.633	433	240	8763200000
A0A087X2I1;P62333;V9HW24;H0YJC0;H0YJS8;B4DR91;H0YJX2;H0YJE9;H0YJT1;H0YJD2;H0YJY8	A0A087X2I1;P62333;V9HW24;H0YJC0	26S protease regulatory subunit 10B	PSMC6;HEL-S-73	11	19	19	19	56.3	45.796	403	217.08	8083200000
O00231;B4DTS5;J3QRY4;J3QS13	O00231;B4DTS5	26S proteasome non-ATPase regulatory subunit 11	PSMD11	4	22	22	22	50.7	47.463	422	164.38	7891200000
Q15008;B3KT66;C9J0E9;C9J7B7;H7C531	Q15008;B3KT66	26S proteasome non-ATPase regulatory subunit 6	PSMD6	5	20	20	20	49.6	45.531	389	175.31	7317000000
Q99460;B2R6D0;A0A087WW66;Q05CW6;Q05BX4;C9J9M4;H7C378;H7BZR6;F8WCE3	Q99460;B2R6D0;A0A087WW66;Q05CW6;Q05BX4	26S proteasome non-ATPase regulatory subunit 1	PSMD1	9	26	26	26	34.2	105.84	953	244.03	7209000000
Q6NVC0;P05141	Q6NVC0;P05141	ADP/ATP translocase 2;ADP/ATP translocase 2, N-terminally processed	SLC25A5	2	12	12	5	34.4	35.293	323	84.554	7076800000
B2RD27;P51665;H3BNT7;H3BTM8;B4DXI8;H3BQV2	B2RD27;P51665;H3BNT7;H3BTM8;B4DXI8	26S proteasome non-ATPase regulatory subunit 7	PSMD7	6	10	10	10	40.4	37.011	324	92.822	6981600000
Q5JP53;Q5SU16;P07437;B7ZAF0;Q6LC01;B4DY90;Q5ST81;B7ZAK1;B4DMU8;Q9BUU9;B4E052;B4DQN9;B2R6L0;Q96B85;B4DXZ5;Q1KSF8;B4DMJ5;A5D907;A5D906;A1L195;A0A075B736;Q5SQY0;A6NNZ2;G3V2A3;B4E386;K7ESM5;B3KS31;B4DP54;Q9BUF5;Q9H4B7;Q6P602;A1L196;M0R2D3;A4UCT2;A4UCU2;M0R1I1;G3V5W4;G3V2R8;M0R042;G3V3R4;M0QYM7;G3V2N6;I0CMK4	Q5JP53;Q5SU16;P07437;B7ZAF0;Q6LC01;B4DY90;Q5ST81;B7ZAK1;B4DMU8;Q9BUU9;B4E052;B4DQN9;B2R6L0;Q96B85;B4DXZ5;Q1KSF8;B4DMJ5	Tubulin beta chain	TUBB;XTP3TPATP1	43	20	20	4	58.9	47.766	426	184.6	6966800000
R4GNH3;A8K781;E9PN50	R4GNH3;A8K781;E9PN50		PSMC3	3	22	22	1	53	47.352	423	192.68	6693700000
P26599;A6NLN1;A0A0U1RRM4;Q59H49;A0A0D9SF20;K7ES59;K7EKJ7;A0A087WU68;K7EK45;K7ELW5;A0A087WUW5;A0A024R163;O95758	P26599;A6NLN1;A0A0U1RRM4;Q59H49	Polypyrimidine tract-binding protein 1	PTBP1	13	17	17	17	47.5	57.221	531	171.5	6270500000
Q53FC7;B3KSM6;B2R6X5;P17066;B4DHP5;P48741	Q53FC7;B3KSM6;B2R6X5;P17066;B4DHP5	Heat shock 70 kDa protein 6	HSPA6	6	8	1	1	12.4	71.003	643	6.9282	5757800000
A0A087WZN1;O43837;A0A087X2E5;L0R875;B4DU38;Q99855;A0A0D9SG66;Q9UIC5	A0A087WZN1;O43837;A0A087X2E5;L0R875;B4DU38	Isocitrate dehydrogenase [NAD] subunit, mitochondrial;Isocitrate dehydrogenase [NAD] subunit beta, mitochondrial	IDH3B	8	15	15	15	43.4	42.41	387	107.88	5551600000
P49411;H3BNU3	P49411	Elongation factor Tu, mitochondrial	TUFM	2	18	18	18	50.7	49.541	452	142.26	5545200000
Q63HR1;Q5VU21;D3DQ69;D3DQ70;Q8NC51	Q63HR1;Q5VU21;D3DQ69;D3DQ70;Q8NC51	Plasminogen activator inhibitor 1 RNA-binding protein	DKFZp686P17171;SERBP1	5	14	14	14	42.9	42.44	387	107.76	5411800000
A0A0S2Z489;O00232;A0A0S2Z476	A0A0S2Z489;O00232	26S proteasome non-ATPase regulatory subunit 12	PSMD12	3	18	18	18	38.2	52.904	456	165.46	5225200000
B4DUQ1;A0A024R228;P61978;Q5EC54;Q5T6W2;B4DFF1;B3KU16;S4R457	B4DUQ1;A0A024R228;P61978;Q5EC54;Q5T6W2;B4DFF1	Heterogeneous nuclear ribonucleoprotein K	HNRPK;HNRNPK	8	17	17	17	40.1	48.51	439	137.04	5214100000
A0A2R8Y5G6;F6S8Q4;A0A0D9SFB3;A0A2R8YF78;A0A2R8YCW1;A0A0D9SG12;A0A2R8YFR4;A0A2U3TZJ9;A0A2R8YFS5;B5BTY4;A0A2R8Y4A4;Q59GX6;A0A2R8Y645;A0A0D9SF53;O00571;A0A2R8YDT5;A0A2R8Y7T2;A0A024R9A4;O15523;A0A2R8YDH3;B4DLU5;Q5S4N1;A0A0J9YVQ7;B4E132;B4E010;A0A087WVZ1;C9J081;B4E3C4;C9J8G5;A0A2R8Y4D2;A0A2R8YCU0;A0A2R8Y650;A0A2R8YF89;B4DLA0;H0Y960;D6RCM4;Q9NQI0	A0A2R8Y5G6;F6S8Q4;A0A0D9SFB3;A0A2R8YF78;A0A2R8YCW1;A0A0D9SG12;A0A2R8YFR4;A0A2U3TZJ9;A0A2R8YFS5;B5BTY4;A0A2R8Y4A4;Q59GX6;A0A2R8Y645;A0A0D9SF53;O00571;A0A2R8YDT5;A0A2R8Y7T2;A0A024R9A4;O15523;A0A2R8YDH3;B4DLU5;Q5S4N1	ATP-dependent RNA helicase DDX3X;ATP-dependent RNA helicase DDX3Y	DDX3X;DDX3Y	37	19	19	19	38.4	69.047	622	166.07	5168100000
B3KT06;B3KPS3;P68363;A8JZY9;P68366;B4DDU2;F8VVB9;F8VWV9;F8VRZ4;F8VS66;C9JDS9;B4DN58;F8VX09;C9JEV8;C9JQ00;C9JJQ8;Q6QMJ5;C9JDL2;C9K0S6;F8VRK0;Q15670;F8VXZ7;D3DX41;F8W0F6;Q9H853;A6NHL2	B3KT06;B3KPS3;P68363;A8JZY9;P68366;B4DDU2;F8VVB9	Tubulin alpha-1B chain;Tubulin alpha-4A chain	TUBA1B;TUBA4A	26	15	15	1	49	46.341	416	144.85	4555400000
E9PCY7;G8JLB6;P31943;H0YB39;E5RGV0;Q68DG4;H0YBD7;D6RBM0;B4DP51;D6RIU0;H0YBG7;E5RGH4;E7EQJ0;D6RAM1;D6R9T0;D6RFM3;D6RIT2;E7EN40;D6RDU3;D6RJ04;D6RIH9;H0YBK1;H0YAQ2;D6R9D3;D6RF17;Q8NI96;D6RDL0	E9PCY7;G8JLB6;P31943;H0YB39;E5RGV0;Q68DG4;H0YBD7;D6RBM0	Heterogeneous nuclear ribonucleoprotein H;Heterogeneous nuclear ribonucleoprotein H, N-terminally processed	HNRNPH1;DKFZp686A15170	27	9	9	2	22.8	47.087	429	68.401	3908000000
P19474;H0YDP8	P19474	E3 ubiquitin-protein ligase TRIM21	TRIM21	2	15	15	15	36	54.169	475	127.05	3839100000
R4GMR5;V9HW09;P48556;Q5U0B3;K7EJR3;K7EJC1;B4E2Y4;K7ERW6;K7ENY6	R4GMR5;V9HW09;P48556;Q5U0B3;K7EJR3;K7EJC1;B4E2Y4	26S proteasome non-ATPase regulatory subunit 8	PSMD8;HEL-S-91n	9	7	7	7	33.1	32.551	287	54.999	3801300000
A0A125QYY8	A0A125QYY8			1	1	1	1	11.6	12.167	112	37.39	3544700000
B4DPW9;Q53GY0;P13797;A0A0A0MSQ0;Q96HI1;B4DG31;U3KQI3;A7E2S2;H7C4N2;B4DI60;Q59GX5;V9HWJ7;Q53FI1;A0A024RDT4;P13796;Q5TBN3;B4DPU6;C9JAM8;Q14651;F2Z2Z9	B4DPW9;Q53GY0;P13797;A0A0A0MSQ0;Q96HI1	Plastin-3	PLS3	20	19	19	19	35.2	67.599	603	168.94	3520000000
A0A1X7SBZ2;A0A1W2PQ51;Q59F66;Q92841;B4DZQ7;Q9UQL5	A0A1X7SBZ2;A0A1W2PQ51;Q59F66;Q92841;B4DZQ7	Probable ATP-dependent RNA helicase DDX17	DDX17	6	14	14	12	23.7	80.253	729	116.09	3508700000
A0A024R3X4;P10809;B3GQS7;B7Z4F6;B7Z597;B7Z5E7;B7Z532;E7EXB4;Q53SE2;E7ESH4;B9VPB4;B9VP19;Q53QD5;A0A0S2Z415;C9JL19;C9JCQ4;C9JL25;B9VP24	A0A024R3X4;P10809;B3GQS7;B7Z4F6;B7Z597;B7Z5E7	60 kDa heat shock protein, mitochondrial	HSPD1	18	18	18	18	40.3	61.054	573	143.31	3102700000
V9HWB4;P11021;B4DEF7;REV__B4DLB6;REV__Q0IJ45;REV__H3BUZ0;REV__Q0IJ46;REV__A0A024R211;REV__X5D300;REV__X5D963;REV__Q9NXD2	V9HWB4;P11021	78 kDa glucose-regulated protein	HEL-S-89n;HSPA5	11	17	17	17	31.8	72.332	654	118.79	2992300000
Q5VWC4;P55036;A6PVX3;H0Y3Y9;H0Y561;A2A3N6	Q5VWC4;P55036;A6PVX3	26S proteasome non-ATPase regulatory subunit 4	PSMD4	6	7	7	7	20.3	41.079	380	56.486	2877400000
B4DDX2;Q07666;B4E043;B2R7B5;B3KTS3;Q5VWX1;E5RG12;E5RJZ9;O75525;H0YAQ1;H0YAQ3	B4DDX2;Q07666;B4E043;B2R7B5	KH domain-containing, RNA-binding, signal transduction-associated protein 1	KHDRBS1	11	8	8	8	20.1	46.459	423	56.379	2852300000
A0A140VKF2;O00487;Q4ZG77;Q53TH1;Q59G89;C9JW37;Q96DE8	A0A140VKF2;O00487;Q4ZG77	26S proteasome non-ATPase regulatory subunit 14	PSMD14	7	6	6	6	36.1	34.577	310	48.925	2691100000
Q76LA1;P04080;A0A1W2PS52;A0A1W2PQG6	Q76LA1;P04080;A0A1W2PS52	Cystatin-B	CSTB	4	4	4	4	70.4	11.139	98	35.438	2465300000
Q53HJ4;B2R7C5;A0A0S2Z4T1;P25205;Q8NHX6;A0A0S2Z492;B4DUQ9;J3KQ69;B4DS46;Q7Z6P5	Q53HJ4;B2R7C5;A0A0S2Z4T1;P25205;Q8NHX6;A0A0S2Z492;B4DUQ9;J3KQ69;B4DS46	DNA helicase;DNA replication licensing factor MCM3	MCM3;HCC5	10	20	20	20	25.6	90.98	808	139.26	2235900000
V9HW65;A0A024R5Z7;P07355;H0YKS4;H0YMD0;H0YMU9;H0YN42;H0YMM1;B4DNH8;A6NMY6;H0YM50;H0YKZ7;H0YLV6;H0YMT9;H0YKX9;H0YNP5;H0YKL9;H0YMW4;H0YKV8;B3KRQ1;H0YN52;H0YMD9;H0YNA0;H0YN28;H0YL33;H0YNB8;H0YKN4;H0YLE2	V9HW65;A0A024R5Z7;P07355;H0YKS4;H0YMD0;H0YMU9;H0YN42;H0YMM1;B4DNH8;A6NMY6;H0YM50;H0YKZ7;H0YLV6;H0YMT9;H0YKX9;H0YNP5;H0YKL9;H0YMW4	Annexin;Annexin A2;Putative annexin A2-like protein	HEL-S-270;ANXA2;ANXA2P2	28	12	12	12	45.1	38.576	339	97.757	2076600000
H0Y6Z7;P10586;Q59FI2;H0Y4H1;Q5W9G3;H0Y7Z9;Q7Z3X4;B3KWM1;B3KXA8;H0Y380;B3KXJ7;B4DWI5;B4DK48;Q59H90;Q3KPI9;G8JL96;Q9UM81;F5GWR7;A0A0A0MR60;Q59FX6;Q2HXI4;P23468;Q13332;A8E4L7;Q16343	H0Y6Z7;P10586;Q59FI2;H0Y4H1;Q5W9G3;H0Y7Z9;Q7Z3X4;B3KWM1;B3KXA8;H0Y380	Receptor-type tyrosine-protein phosphatase F;Protein-tyrosine-phosphatase	PTPRF;LAR;DKFZp686B1310	25	21	21	21	20.2	174.84	1553	179.62	2071500000
Q53FG5;B1AHB0;P33992;A8K521;B4DQ39;B1AHB1;B3KVF0;B4DVK5;B1AHB2;Q59F49;B1AHA9	Q53FG5;B1AHB0;P33992;A8K521;B4DQ39;B1AHB1;B3KVF0;B4DVK5	DNA helicase;DNA replication licensing factor MCM5	MCM5	11	23	23	23	33.4	82.236	734	176.08	2026200000
A0A0S2Z410;Q99714;Q5H928;A0A0S2Z434	A0A0S2Z410;Q99714;Q5H928;A0A0S2Z434	3-hydroxyacyl-CoA dehydrogenase type-2	HSD17B10	4	8	8	8	50.2	26.923	261	93.299	1880500000
P49327;A0A0U1RQF0;Q6PJJ3;A0A0U1RRG3;A0A1B0GTR5;Q13587;J3KTF0	P49327;A0A0U1RQF0	Fatty acid synthase;[Acyl-carrier-protein] S-acetyltransferase;[Acyl-carrier-protein] S-malonyltransferase;3-oxoacyl-[acyl-carrier-protein] synthase;3-oxoacyl-[acyl-carrier-protein] reductase;3-hydroxyacyl-[acyl-carrier-protein] dehydratase;Enoyl-[acyl-carrier-protein] reductase;Oleoyl-[acyl-carrier-protein] hydrolase	FASN	7	32	32	32	18.3	273.42	2511	274.96	1874400000
A0A2P9AAP7	A0A2P9AAP7			1	3	2	2	3.4	74.941	696	19.768	1824100000
V9HW63;Q13162;H7C3T4;A6NJJ0;A6NG45	V9HW63;Q13162;H7C3T4	Peroxiredoxin-4	HEL-S-97n;PRDX4	5	8	7	7	44.6	30.54	271	52.73	1585100000
P0DN79;P35520;B7Z2D6;Q9NTF0;B7Z6W5;C9JMA6;H7C2H4;Q96EH7;H7C1W6;H7C2W0	P0DN79;P35520;B7Z2D6;Q9NTF0;B7Z6W5;C9JMA6;H7C2H4	Cystathionine beta-synthase	CBS;DKFZp727E011	10	10	10	10	25.2	60.586	551	87.483	1518000000
X5D2J9;Q499G6;X5D939;X5DNP5;B4DH52;X5DR09;P78347;A8K9W7;A0A1W6S962;B4DRA9;X5D7Q9;C9J6M0;A0A0A0VEB4	X5D2J9;Q499G6;X5D939;X5DNP5;B4DH52;X5DR09;P78347;A8K9W7;A0A1W6S962;B4DRA9	General transcription factor II-I	GTF2I	13	11	11	11	17.9	107.97	957	93.082	1386600000
Q06830;A0A0A0MSI0;B2R4P2;A0A0A0MRQ5	Q06830;A0A0A0MSI0;B2R4P2	Peroxiredoxin-1	PRDX1	4	10	10	8	61.8	22.11	199	75.312	1321500000
Q9Y383;B3KSL5;A0A0A6YYJ8;B3KRR1;B8ZZ10;A8MYV2;D3DU41;Q1W6G4;Q9NQ29;Q53G47;Q75M91;V9GZ75;F8WEU3;B8ZZ09;B3KSP8	Q9Y383;B3KSL5;A0A0A6YYJ8;B3KRR1	Putative RNA-binding protein Luc7-like 2	LUC7L2	15	8	8	8	24	46.513	392	65.415	1309800000
P42677;C9JLI6;H0YMV8;A4D1G5;Q71UM5	P42677	40S ribosomal protein S27	RPS27	5	4	4	4	31	9.461	84	31.258	1199800000
A0A024R5N4;F5H0C4;Q9BRP4;F5H3I1;F5H103;F5H0F7;F5H3E9;F5H5D4;H0YGB1;Q15465	A0A024R5N4;F5H0C4;Q9BRP4;F5H3I1;F5H103;F5H0F7	Proteasomal ATPase-associated factor 1	WDR71;PAAF1	10	8	8	8	23.7	40.439	375	57.539	1050900000
F8VVM2;Q8NCF7;Q53HC3;B2RE88;A0A024RBE8;A0A024RBH9;Q00325	F8VVM2;Q8NCF7;Q53HC3;B2RE88;A0A024RBE8;A0A024RBH9;Q00325	Phosphate carrier protein, mitochondrial	SLC25A3	7	2	2	2	5.9	36.161	324	13.217	989790000
A0A024R5K8;P50454;B4DN87;A8K259;E9PR70;E9PPV6;E9PQ34;E9PJH8;E9PIG2;E9PRS3;E9PKH2;E9PNX1;E9PK86;E9PMI5;H0YEP8;Q9NPA9	A0A024R5K8;P50454;B4DN87;A8K259;E9PR70;E9PPV6;E9PQ34;E9PJH8;E9PIG2;E9PRS3;E9PKH2;E9PNX1;E9PK86;E9PMI5	Serpin H1	SERPINH1	16	6	6	6	21.8	46.44	418	52.204	883990000
B7ZM99;Q6UB35;A0A087WVM4;B2RD24;H0Y327;Q5JYA8;Q5JYA3	B7ZM99;Q6UB35;A0A087WVM4;B2RD24	Monofunctional C1-tetrahydrofolate synthase, mitochondrial	MTHFD1L	7	9	9	9	11.1	105.89	979	78.886	871120000
H9ZYJ2;P10599	H9ZYJ2;P10599	Thioredoxin	TXN	2	3	3	3	30.5	11.737	105	21.377	844550000
P27348;E9PG15;Q53RR5;B4DMT8;B4DY04;Q53S41	P27348;E9PG15;Q53RR5;B4DMT8	14-3-3 protein theta	YWHAQ	6	5	5	3	20.4	27.764	245	35.102	835440000
B4DRD7;H3BRU6;F8VZX2;Q15366;B4DLC0;F8VXH9;F8W0G4;F8W1G6;F8VRH0;F8VTZ0;H3BSS4;J3QT27;Q5MJP6;E9PFP8;P57721;H3BND9	B4DRD7;H3BRU6;F8VZX2;Q15366;B4DLC0;F8VXH9;F8W0G4;F8W1G6;F8VRH0	Poly(rC)-binding protein 2	PCBP2	16	6	6	5	30.5	29.737	282	63.368	807390000
B4E1E0;P17812;B4DMB5;B7Z9C4;A0A024RC00;Q9NRF8	B4E1E0;P17812;B4DMB5	CTP synthase;CTP synthase 1	CTPS1	6	6	6	6	25.3	49.694	435	53.873	803900000
Q6P9C2;B2RAL9;Q99956;Q8N4A4;P78512	Q6P9C2;B2RAL9;Q99956;Q8N4A4	Dual specificity protein phosphatase;Dual specificity protein phosphatase 9	DUSP9	5	10	10	10	40.4	41.934	384	78.433	755640000
A0A1W6IYK3	A0A1W6IYK3			1	1	1	1	9.7	12.221	113	21.071	752030000
B4DKS8;A0A024R7T3;P52597	B4DKS8;A0A024R7T3;P52597	Heterogeneous nuclear ribonucleoprotein F;Heterogeneous nuclear ribonucleoprotein F, N-terminally processed	HNRPF;HNRNPF	3	5	2	2	19.5	37.255	338	19.938	747100000
Q68DU0;C9JZR2;O60716;Q96FS1;Q7KZJ3;A0A024R4Z0;A0A024R4Y7;H0YC95;E9PKY0;E9PRE2	Q68DU0;C9JZR2;O60716;Q96FS1;Q7KZJ3;A0A024R4Z0;A0A024R4Y7	Catenin delta-1	DKFZp781O2021;CTNND1	10	10	10	10	14.9	104.82	938	83.024	739070000
A0A024R1A3;P22314;B4DDE4;B4DL67;Q5JRS2;Q5JRR9;Q5JRS0;Q5JRR6;B3KUJ2;Q8WY81;Q5JRS1;Q5JRS3	A0A024R1A3;P22314;B4DDE4	Ubiquitin-like modifier-activating enzyme 1	UBE1;UBA1	12	10	10	10	14.4	117.85	1058	75.549	731920000
A0A0S2Z4G7;A0A0S2Z491;P06748;A0A140VJQ2;A4ZU86;Q9BTI9;E5RGW4;E5RI98;V9HVU7;A0A024RAP1	A0A0S2Z4G7;A0A0S2Z491;P06748;A0A140VJQ2;A4ZU86;Q9BTI9	Nucleophosmin	NPM1	10	4	4	4	23.4	29.464	265	35.008	693060000
Q6I9V5;P12236;Q59EI9;Q9H0C2;O75961;Q59EP7	Q6I9V5;P12236;Q59EI9	ADP/ATP translocase 3;ADP/ATP translocase 3, N-terminally processed	SLC25A6	6	12	5	5	38.3	32.866	298	31.585	684210000
A0A024R1Y2;A0A024R1T9;Q4LE36;P53396;Q8N9C4;K7ESG8;K7EIE7	A0A024R1Y2;A0A024R1T9;Q4LE36;P53396;Q8N9C4	ATP-citrate synthase	ACLY;ACLY variant protein	7	10	10	10	11.5	119.77	1091	74.384	679380000
B2R4S9;A8K9J7;A0A024RCL8;A0A024RCJ9;A0A024RCJ2;A0A024QZZ7;I6L9F7;U3KQK0;B4DR52;Q99880;Q99879;Q99877;Q93079;Q8N257;Q5QNW6;Q16778;P62807;P58876;P57053;P33778;P23527;P06899;O60814;Q0D2M2;Q96A08;L0R4T3;A0A2R8Y619	B2R4S9;A8K9J7;A0A024RCL8;A0A024RCJ9;A0A024RCJ2;A0A024QZZ7;I6L9F7;U3KQK0;B4DR52;Q99880;Q99879;Q99877;Q93079;Q8N257;Q5QNW6;Q16778;P62807;P58876;P57053;P33778;P23527;P06899;O60814;Q0D2M2;Q96A08	Histone H2B;Histone H2B type 1-L;Histone H2B type 1-M;Histone H2B type 1-N;Histone H2B type 1-H;Histone H2B type 3-B;Histone H2B type 2-F;Histone H2B type 2-E;Histone H2B type 1-C/E/F/G/I;Histone H2B type 1-D;Histone H2B type F-S;Histone H2B type 1-B;Histone H2B type 1-O;Histone H2B type 1-J;Histone H2B type 1-K;Histone H2B type 1-A	HIST1H2BI;HIST1H2BK;HIST1H2BN;HIST1H2BJ;HIST1H2BD;HIST1H2BM;HIST1H2BL;HIST1H2BH;HIST3H2BB;HIST2H2BF;HIST2H2BE;HIST1H2BC;H2BFS;HIST1H2BB;HIST1H2BO;HIST1H2BA	27	3	3	3	27	13.906	126	22.12	662100000
A0A024RDQ0;A0A024RDS1;Q92598;B4DF68;A0A0A0MSM0;B4DY72;B4DZB4;R4GN69	A0A024RDQ0;A0A024RDS1;Q92598;B4DF68;A0A0A0MSM0;B4DY72;B4DZB4	Heat shock protein 105 kDa	HSPH1	8	8	8	8	14.6	92.115	814	67.068	639560000
B3KSG0;A0A140VK73;Q9NPH2;B7Z3K3;J3QS51;J3KRH4	B3KSG0;A0A140VK73;Q9NPH2;B7Z3K3	Inositol-3-phosphate synthase 1	ISYNA1	6	9	9	9	32.4	44.772	408	77.948	634370000
A0A140VJK6;P49915;B4DUT7;Q53F90;A0A2P9ADM6	A0A140VJK6;P49915;B4DUT7;Q53F90	GMP synthase [glutamine-hydrolyzing]	GMPS	5	8	8	8	16.5	76.715	693	63.833	624760000
Q6P2Q9;B4DK16;I3L3Z8;I3L0J9;Q53GM6;I3L1T8;Q6JH02;Q6JH03	Q6P2Q9	Pre-mRNA-processing-splicing factor 8	PRPF8	8	11	11	11	6.3	273.6	2335	73.144	608540000
V9HW98;G9K389;G9K388;P62258;B7ZA86;K7EM20;B3KT37	V9HW98;G9K389;G9K388;P62258;B7ZA86	14-3-3 protein epsilon	HEL2;YWHAE/FAM22B fusion;YWHAE/FAM22A fusion;YWHAE	7	5	4	4	19.2	29.174	255	26.741	564200000
O95831;Q5RZ99;Q5RZA0	O95831;Q5RZ99;Q5RZA0	Apoptosis-inducing factor 1, mitochondrial	AIFM1	3	5	5	5	10.4	66.9	613	34.063	558020000
F1T0B3;A0A087X2G1;A3RJH1;Q92499;B4DP70	F1T0B3;A0A087X2G1;A3RJH1;Q92499;B4DP70	ATP-dependent RNA helicase DDX1	DDX1	5	8	8	8	16.4	73.915	659	73.71	556200000
B4E106;B4DKS0;A0A024R0H1;P53985;Q5T8R3;Q5T8R5;B2R6A5	B4E106;B4DKS0;A0A024R0H1;P53985;Q5T8R3;Q5T8R5;B2R6A5	Monocarboxylate transporter 1	SLC16A1	7	2	2	2	6.7	51.878	480	29.604	547270000
Q16186;B4DMP7;Q68E00;A0A087WX59;A0A087WUX6	Q16186;B4DMP7;Q68E00;A0A087WX59	Proteasomal ubiquitin receptor ADRM1	ADRM1;DKFZp686G2045	5	6	6	6	15.2	42.153	407	39.304	546670000
A0A2P9ACV8	A0A2P9ACV8			1	1	1	1	16.9	7.4362	71	6.5043	500770000
A0A024RCX8;Q9Y3C6	A0A024RCX8;Q9Y3C6	Peptidyl-prolyl cis-trans isomerase;Peptidyl-prolyl cis-trans isomerase-like 1	PPIL1	2	2	2	2	16.3	18.237	166	14.435	500530000
[truncated: 283 more rows]

## Sheet: PSMD10+NleE peptides
Sequence	Length	Missed cleavages	Mass	Proteins	Leading razor protein	Start position	End position	Gene names	Protein names	Unique (Groups)	Charges	PEP	Score	PSM 252	Intensity	Methyl (C) site IDs
[truncated: 1,707 more rows]
