# Supplementary material for: Genetically incorporated crosslinkers reveal NleE attenuates host autophagy dependent on PSMD10
Source: eLife. 2021 Jul 13;10:e69047. doi: 10.7554/eLife.69047 (PMC8324295; doi:10.7554/eLife.69047)
Supplement: Figure 4—figure supplement 2—source data 1. [file elife-69047-fig4-figsupp2-data1.xls]

## Sheet: Sheet1
Sample	NleE level	actin level	NleE/actin	normalized
NleE-I174BetY	7561	9757	0.774931	0.63465
NleE-M175BetY	5912	6614	0.893862	0.732051
NleE-A187BetY	6828	9040	0.75531	0.61858
NleE-V188BetY	6613	9014	0.733637	0.600831
NleE-K189BetY	6197	8111	0.764024	0.625717
NleE-S190BetY	4599	8271	0.556039	0.455383
NleE-F191BetY	6099	8534	0.714671	0.585298
NleE-WT	14313	11722	1.22104	1
