# Supplementary material for: Genetically incorporated crosslinkers reveal NleE attenuates host autophagy dependent on PSMD10
Source: eLife. 2021 Jul 13;10:e69047. doi: 10.7554/eLife.69047 (PMC8324295; doi:10.7554/eLife.69047)
Supplement: Figure 5—source data 1. [file elife-69047-fig5-data1.xls]

## Sheet: Sheet1
Sample	PSMD10 dimer/monomer rep1	PSMD10 dimer/monomer rep2	PSMD10 dimer/monomer rep3	Mean	Standard deviation
PSMD10-M9Azi	0.863688	0.964064	0.855831	0.894528	0.060348
PSMD10-M9Azi+NleE	0.525833	0.688608	0.566622	0.593687	0.0846955
PSMD10-D37Azi	1.0267	1.02308	1.04059	1.03012	0.00924392
PSMD10-D37Azi+NleE	0.813573	0.847222	0.740842	0.800546	0.0543732
PSMD10-E204Azi	2.5597	2.00198	1.65277	2.07149	0.45744
PSMD10-E204Azi+NleE	0.571602	0.348163	0.522624	0.480797	0.117446
