# Supplementary material for: Genetically incorporated crosslinkers reveal NleE attenuates host autophagy dependent on PSMD10
Source: eLife. 2021 Jul 13;10:e69047. doi: 10.7554/eLife.69047 (PMC8324295; doi:10.7554/eLife.69047)
Supplement: Figure 6—source data 1. [file elife-69047-fig6-data1.xls]

## Sheet: Sheet1
Sample	Relative ATG7 mRNA level rep1	Relative ATG7 mRNA level rep2	Relative ATG7 mRNA level rep3	Mean	Standard deviation
Ctrl	1.01407	0.976877	1.00905	1	0.0201819
OE NleE	0.985422	1.05068	0.991885	1.00933	0.0359594
OE PSMD10	1.19163	1.13296	1.23332	1.18597	0.0504213
