# Supplementary material for: Genetically incorporated crosslinkers reveal NleE attenuates host autophagy dependent on PSMD10
Source: eLife. 2021 Jul 13;10:e69047. doi: 10.7554/eLife.69047 (PMC8324295; doi:10.7554/eLife.69047)
Supplement: Figure 7—figure supplement 2—source data 1. [file elife-69047-fig7-figsupp2-data1.xls]

## Sheet: Sheet1
Sample	Ctrl	PSMD10-C4S
	40	47
	42	50
	29	52
	11	44
	46	56
	42	35
	50	56
	54	30
	55	24
	38	29
	40	30
	28	41
	40	36
	42	52
	34	29
	53	30
	30	33
	39	22
	67	26
	88	46
Mean	43.4	38.4
Standard deviation	15.8725	11.1421
