# Supplementary material for: Genetically incorporated crosslinkers reveal NleE attenuates host autophagy dependent on PSMD10
Source: eLife. 2021 Jul 13;10:e69047. doi: 10.7554/eLife.69047 (PMC8324295; doi:10.7554/eLife.69047)
Supplement: Figure 7—figure supplement 2—source data 2. [file elife-69047-fig7-figsupp2-data2.xls]

## Sheet: Sheet1
Sample	Ctrl	PSMD10-C4S
	69	102
	84	64
	159	58
	119	118
	117	166
	62	135
	96	38
	62	125
	161	58
	198	73
	96	88
	78	139
	97	56
	146	140
	89	156
	89	80
	123	129
	206	205
	119	79
	82	70
	109	140
	149	90
	92	76
	104	62
	39	81
	76	121
	128	102
	107	290
	106	48
	94	200
	106	114
	112	95
	84	138
	53	94
	62	47
Mean	104.943	107.914
Standard deviation	37.5311	52.4468
