# Supplementary material for: Genetically incorporated crosslinkers reveal NleE attenuates host autophagy dependent on PSMD10
Source: eLife. 2021 Jul 13;10:e69047. doi: 10.7554/eLife.69047 (PMC8324295; doi:10.7554/eLife.69047)
Supplement: Figure 7—figure supplement 2—source data 3. [file elife-69047-fig7-figsupp2-data3.xls]

## Sheet: Sheet1
Sample	Ctrl	PSMD10-C4S-M1C
	32	76
	25	73
	49	90
	42	72
	45	47
	48	49
	67	63
	60	85
	53	36
	47	65
	59	44
	60	48
	64	59
	66	29
	57	89
	31	43
	68	46
	43	50
	55	68
	32	47
	48	74
	27	78
	42	67
	61	36
	65	59
	26	63
	47	61
	63	40
	41	35
Mean	49.069	58.3448
Standard deviation	13.32	17.0258
