# Supplementary material for: Genetically incorporated crosslinkers reveal NleE attenuates host autophagy dependent on PSMD10
Source: eLife. 2021 Jul 13;10:e69047. doi: 10.7554/eLife.69047 (PMC8324295; doi:10.7554/eLife.69047)
Supplement: Figure 7—figure supplement 2—source data 4. [file elife-69047-fig7-figsupp2-data4.xls]

## Sheet: Sheet1
Sample	PSMD10-C4S	PSMD10-C4S+NleE
	37	41
	66	57
	71	63
	62	52
	37	49
	42	50
	59	47
	38	35
	36	52
	29	54
	44	48
	65	65
	19	67
	85	71
	61	67
	35	56
	57	55
	41	28
	43	49
	66	42
	27	52
	55	49
	66	41
Mean	49.6087	51.7391
Standard deviation	16.7053	10.515
