# Supplementary material for: Genetically incorporated crosslinkers reveal NleE attenuates host autophagy dependent on PSMD10
Source: eLife. 2021 Jul 13;10:e69047. doi: 10.7554/eLife.69047 (PMC8324295; doi:10.7554/eLife.69047)
Supplement: Figure 7—figure supplement 2—source data 5. [file elife-69047-fig7-figsupp2-data5.xls]

## Sheet: Sheet1
Sample	PSMD10-C11S	PSMD10-C11S+NleE
	47	39
	45	47
	47	51
	78	39
	89	56
	44	82
	92	53
	33	63
	46	64
	97	37
	62	67
	75	52
	78	44
	77	81
	71	49
	85	75
	43	68
	49	43
	53	54
	70	34
	98	50
	58	28
	65	49
Mean	65.3043	53.2609
Standard deviation	19.3941	14.5484
