# Supplementary material for: Genetically incorporated crosslinkers reveal NleE attenuates host autophagy dependent on PSMD10
Source: eLife journal article supplement (doi:10.7554/elife.69047), 2021-07-13
Supplement: supp [file elife_poa_e69047_Figure_1_figure_supplement_1_source_data_3.xls]

## Sheet: Sheet1
Sample	IL-6 rep1	IL-6 rep2	IL-6 rep3	Mean	Standard deviation
EPEC WT	46.7065	30.2644	34.58	37.1836	8.52463
EPEC WT+Wortmannin	39.8075	25.3409	29.3222	31.4902	7.473
